# Supplementary material
Source: PubMed Central journal article supplement (PMC5164948)
Supplement: NIHMS819876-supplement-supplement_1.pdf [file NIHMS819876-supplement-supplement_1.pdf]

**Supplementary Figure 1:** Principal-components analysis (PCA) for the GWAS1 and GWAS2 samples. Cases and controls positions on first and second components axis are presented for 2936 GWAS1 samples (1258 cases and 1678 controls) and 4411 GWAS2 samples (1087 cases and 3324 controls). Shaded area highlights outlier samples excluded before association test based on the principal component analyses. Vertical and horizontal lines indicate threshold for inclusion / exclusion criteria. Cases are represented in orange and controls in dark blue.

**Supplementary Figure 2A, 2B and 2C:** LocusZoom plots of SNPs by chromosome position against  $-\log_{10} p$ -value for their genetic associations with the UC phenotype. **(A)** Chromosome 6, *HLA* association region; **(B)** Chromosome 3, *LSAMP* association region; **(C)** Chromosome 21, *USP25* association region. The top SNP is highlighted in purple. The surrounding SNPs, shown within 3000kb (*HLA*), 500kb (*LSAMP*), and 250kb (*USP25*) of the top SNP are color-coded to reflect their linkage disequilibrium in  $r^2$  with the top SNP (*see inset*). Estimated recombination rates are plotted in pale blue to reflect local LD structure on secondary y-axis.

**Supplementary Figure 3:** LocusZoom plots of SNPs by chromosome position against  $-\log_{10} p$ -value for their genetic associations with phenotype for *ZNF649* association region (chr19q13) with UC phenotype. The top associated SNP is highlighted in purple. The

surrounding SNPs, shown within 500kb of the top SNP are color-coded to reflect their linkage disequilibrium in  $r^2$  with the top SNP (see *inset*). Estimated recombination rates are plotted in pale blue to reflect local LD structure on secondary  $y$ -axis.

**Supplementary Figure 4:** Alleles intensity cluster plot for rs72947885 (*LSAMP*) for the IBD samples in our study. The SNP rs72947885 genotypes from GWAS 2 (Affymetrix Axiom Genome-Wide AFR 1 Array World Array 3) have been assigned based on cluster formation in scatter plots of normalized allele intensities on the X (allele A) and Y (Allele B) axis. Each data point represents one individual's genotype. The Blue and red cluster indicate homozygotes for rs72947885, yellow indicates heterozygote and grey indicates undetermined. The three distinct, tight clusters show good discrimination of the genotypes.

Supplementary Table 1 (Excel file): Results for all association with p-values  $<6.5 \times 10^{-5}$  in either GWAS1 or GWAS2 analyses for CD, UC and IBD. Suggestive SNPs at established European loci (specifically  $<1$  Mb of the maximal reported associations) for IBD, CD and UC are indicated in bold.

Supplementary Table 1: Suggestive SNPs at established European loci (specifically <1 Mb of the maximal reported associations) for CD are indicated in bold

| Chr | Position  | A1 | A2          | SNP Name               | GWAS1 (Omni2.5) |           |              |            |             | GWAS2 (Axiom) |           |              |             |             | Combined |                                       | nearest_gene(s)                                | Annotation     |
|-----|-----------|----|-------------|------------------------|-----------------|-----------|--------------|------------|-------------|---------------|-----------|--------------|-------------|-------------|----------|---------------------------------------|------------------------------------------------|----------------|
|     |           |    |             |                        | P_value         | Case_Freq | Control_Freq | OR         | OR_CI       | P_Value       | Case_Freq | Control_Freq | OR          | OR_CI       | OR       | P-value                               |                                                |                |
| 16  | 50709723  | G  | A           | rs6596                 | 3.55E-05        | 0.058     | 0.032        | 1.91       | 1.42 - 2.56 | 3.14E-04      | 0.062     | 0.049        | 1.28        | 1 - 1.64    | 2.06     | 1.14E-07                              | SNX20                                          | exonic         |
| 5   | 40424426  | A  | C           | rs6896969              | 5.46E-04        | 0.333     | 0.387        | 1.26       | 1.11 - 1.44 | 4.22E-05      | 0.330     | 0.391        | 1.30        | 1.15 - 1.47 | 1.28     | 1.69E-07                              | LINC00603(dist=371000), PTGER4(dist=255606)    | intergenic     |
| 5   | 40406130  | T  | A           | rs6871591              | 4.07E-04        | 0.334     | 0.390        | 1.27       | 1.12 - 1.45 | 5.90E-05      | 0.330     | 0.389        | 1.30        | 1.14 - 1.47 | 1.28     | 1.70E-07                              | LINC00603(dist=352704), PTGER4(dist=273902)    | intergenic     |
| 1   | 67665210  | A  | G           | rs1569923              | 2.91E-05        | 0.434     | 0.362        | 0.74       | 0.65 - 0.84 | 8.37E-04      | 0.425     | 0.389        | 0.86        | 0.76 - 0.97 | 0.78     | 1.88E-07                              | IL23R                                          | intronic       |
| 5   | 40419949  | C  | G           | rs10473192             | 5.84E-04        | 0.334     | 0.387        | 1.26       | 1.11 - 1.44 | 4.48E-05      | 0.333     | 0.393        | 1.30        | 1.15 - 1.47 | 1.28     | 1.90E-07                              | LINC00603(dist=366523), PTGER4(dist=260083)    | intergenic     |
| 5   | 40426420  | G  | T           | rs957100               | 5.21E-04        | 0.333     | 0.387        | 1.27       | 1.11 - 1.44 | 5.26E-05      | 0.330     | 0.390        | 1.30        | 1.15 - 1.47 | 1.28     | 1.96E-07                              | LINC00603(dist=372994), PTGER4(dist=253612)    | intergenic     |
| 5   | 40420666  | C  | G           | rs7705462              | 5.54E-04        | 0.333     | 0.387        | 1.26       | 1.11 - 1.44 | 5.01E-05      | 0.330     | 0.390        | 1.30        | 1.15 - 1.47 | 1.27     | 1.99E-07                              | LINC00603(dist=367240), PTGER4(dist=259366)    | intergenic     |
| 5   | 40419143  | G  | C           | rs114400949            | 5.40E-04        | 0.333     | 0.387        | 1.26       | 1.11 - 1.44 | 5.21E-05      | 0.330     | 0.391        | 1.30        | 1.15 - 1.47 | 1.27     | 2.01E-07                              | LINC00603(dist=365717), PTGER4(dist=260889)    | intergenic     |
| 5   | 40417841  | C  | T           | rs2371720              | 5.54E-04        | 0.333     | 0.387        | 1.26       | 1.11 - 1.44 | 5.09E-05      | 0.330     | 0.390        | 1.30        | 1.15 - 1.47 | 1.27     | 2.02E-07                              | LINC00603(dist=364415), PTGER4(dist=262191)    | intergenic     |
| 5   | 40425701  | G  | T           | rs6451498              | 5.44E-04        | 0.333     | 0.387        | 1.26       | 1.11 - 1.44 | 5.21E-05      | 0.330     | 0.390        | 1.30        | 1.15 - 1.47 | 1.27     | 2.03E-07                              | LINC00603(dist=372275), PTGER4(dist=254331)    | intergenic     |
| 5   | 40425190  | T  | G           | rs6879489              | 5.09E-04        | 0.333     | 0.387        | 1.27       | 1.11 - 1.44 | 5.61E-05      | 0.331     | 0.391        | 1.30        | 1.15 - 1.47 | 1.28     | 2.03E-07                              | LINC00603(dist=371764), PTGER4(dist=254842)    | intergenic     |
| 5   | 40423280  | G  | A           | rs7730591              | 5.46E-04        | 0.333     | 0.387        | 1.26       | 1.11 - 1.44 | 5.21E-05      | 0.330     | 0.390        | 1.30        | 1.15 - 1.47 | 1.27     | 2.03E-07                              | LINC00603(dist=369854), PTGER4(dist=256752)    | intergenic     |
| 5   | 40423234  | C  | T           | rs7716887              | 5.46E-04        | 0.333     | 0.387        | 1.26       | 1.11 - 1.44 | 5.21E-05      | 0.330     | 0.390        | 1.30        | 1.15 - 1.47 | 1.27     | 2.03E-07                              | LINC00603(dist=369808), PTGER4(dist=256798)    | intergenic     |
| 5   | 40422938  | A  | C           | rs6876242              | 5.50E-04        | 0.333     | 0.387        | 1.26       | 1.11 - 1.44 | 5.20E-05      | 0.330     | 0.391        | 1.30        | 1.15 - 1.47 | 1.27     | 2.05E-07                              | LINC00603(dist=369512), PTGER4(dist=257094)    | intergenic     |
| 5   | 40415067  | C  | T           | rs1992660              | 5.47E-04        | 0.333     | 0.387        | 1.26       | 1.11 - 1.44 | 5.54E-05      | 0.329     | 0.389        | 1.30        | 1.15 - 1.47 | 1.27     | 2.15E-07                              | LINC00603(dist=361641), PTGER4(dist=264965)    | intergenic     |
| 5   | 40406050  | A  | T           | rs6890268              | 5.10E-04        | 0.333     | 0.387        | 1.27       | 1.11 - 1.44 | 6.04E-05      | 0.330     | 0.389        | 1.30        | 1.14 - 1.47 | 1.27     | 2.17E-07                              | LINC00603(dist=352624), PTGER4(dist=273982)    | intergenic     |
| 13  | 97645439  | C  | T           | rs9300381              | 2.50E-03        | 0.072     | 0.052        | 1.40       | 1.08 - 1.8  | 1.09E-05      | 0.080     | 0.049        | 1.71        | 1.36 - 2.15 | 1.68     | 2.42E-07                              | OXGR1                                          | intronic       |
| 13  | 97644347  | T  | C           | rs9584460              | 2.59E-03        | 0.071     | 0.052        | 1.39       | 1.08 - 1.79 | 1.05E-05      | 0.080     | 0.049        | 1.71        | 1.36 - 2.15 | 1.68     | 2.43E-07                              | OXGR1                                          | intronic       |
| 5   | 40412944  | T  | A           | rs10473191             | 5.43E-04        | 0.333     | 0.387        | 1.26       | 1.11 - 1.44 | 6.46E-05      | 0.329     | 0.389        | 1.29        | 1.14 - 1.47 | 1.27     | 2.45E-07                              | LINC00603(dist=359518), PTGER4(dist=267088)    | intergenic     |
| 5   | 124293144 | T  | C           | rs386692020;rs73782531 | 1.32E-12        | 0.013     | 0.056        | 0.22       | 0.13 - 0.35 | 5.13E-01      | 0.042     | 0.044        | 0.95        | 0.71 - 1.27 | 0.55     | 2.53E-07                              | ZNF608(dist=212339), LOC101927421(dist=79380)  | intergenic     |
| 2   | 130406427 | C  | T           | rs79146219             | 2.00E-05        | 0.058     | 0.029        | 2.03       | 1.5 - 2.75  | 1.23E-03      | 0.063     | 0.054        | 1.16        | 0.91 - 1.48 | 2.11     | 2.78E-07                              | LOC151121(dist=374963), LOC389033(dist=274008) | intergenic     |
| 5   | 40391104  | C  | T           | rs6865484              | 1.06E-03        | 0.303     | 0.350        | 1.24       | 1.09 - 1.42 | 6.02E-05      | 0.298     | 0.358        | 1.31        | 1.15 - 1.49 | 1.27     | 4.50E-07                              | LINC00603(dist=337678), PTGER4(dist=288928)    | intergenic     |
| 16  | 17847781  | G  | A           | rs28714651             | 1.03E-05        | 0.126     | 0.177        | 0.67       | 0.56 - 0.8  | 3.14E-03      | 0.134     | 0.157        | 0.83        | 0.7 - 0.99  | 0.70     | 4.59E-07                              | XFLT1(dist=283043), NPIPA7(dist=563995)        | intergenic     |
| 5   | 40497604  | G  | A           | rs4286721              | 2.20E-05        | 0.320     | 0.384        | 1.32       | 1.16 - 1.51 | 4.11E-03      | 0.329     | 0.369        | 1.19        | 1.05 - 1.35 | 1.26     | 8.56E-07                              | LINC00603(dist=444178), PTGER4(dist=182428)    | intergenic     |
| 1   | 34536654  | G  | T           | rs56094621             | 5.75E-03        | 0.055     | 0.038        | 1.49       | 1.12 - 1.99 | 2.41E-05      | 0.070     | 0.056        | 1.27        | 1.01 - 1.61 | 2.01     | 1.10E-06                              | CSMD2                                          | intronic       |
| 14  | 53703764  | T  | G           | rs61986947             | 2.85E-02        | 0.040     | 0.024        | 1.71       | 1.21 - 2.42 | 3.03E-06      | 0.056     | 0.039        | 1.47        | 1.13 - 1.92 | 1.99     | 1.11E-06                              | LOC101927620(dist=79518), MIR5580(dist=711381) | intergenic     |
| 19  | 47042336  | A  | G           | rs2033502              | 5.18E-07        | 0.411     | 0.475        | 1.30       | 1.14 - 1.47 | 5.42E-02      | 0.468     | 0.483        | 1.06        | 0.94 - 1.19 | 1.31     | 1.74E-06                              | PPP5D1                                         | intronic       |
| 11  | 12501669  | G  | A           | rs140147980            | 2.90E-02        | 0.039     | 0.029        | 1.36       | 0.97 - 1.91 | 2.56E-06      | 0.044     | 0.025        | 1.82        | 1.34 - 2.46 | 2.18     | 1.87E-06                              | PARVA                                          | intronic       |
| 16  | 7598016   | T  | C           | rs79310683             | 5.31E-06        | 0.024     | 0.054        | 0.43       | 0.3 - 0.62  | 2.03E-02      | 0.034     | 0.046        | 0.72        | 0.52 - 0.98 | 0.58     | 1.99E-06                              | RBFOX1                                         | intronic       |
| 21  | 30922000  | G  | T           | rs9982017              | 5.45E-02        | 0.057     | 0.041        | 0.70       | 0.53 - 0.93 | 1.77E-06      | 0.085     | 0.063        | 0.73        | 0.59 - 0.91 | 0.58     | 2.20E-06                              | GRIK1                                          | intronic       |
| 3   | 3359278   | A  | rs149630218 | 2.73E-06               | 0.045           | 0.025     | 1.82         | 1.3 - 2.54 | 3.70E-01    | 0.025         | 0.021     | 1.19         | 0.81 - 1.75 | 2.80        | 2.42E-06 | CRBN(dist=137877), LRRN1(dist=481843) | intergenic                                     |                |
| 8   | 103659239 | T  | G           | rs76386016             | 2.74E-02        | 0.034     | 0.027        | 1.27       | 0.89 - 1.81 | 1.13E-06      | 0.038     | 0.021        | 1.82        | 1.31 - 2.53 | 2.44     | 2.50E-06                              | ODF1(dist=85994), KLF10(dist=1766)             | intergenic     |
| 7   | 40781394  | A  | G           | rs76287267             | 1.93E-06        | 0.038     | 0.022        | 1.76       | 1.23 - 2.52 | 1.20E-01      | 0.025     | 0.028        | 0.89        | 0.61 - 1.29 | 3.72     | 2.55E-06                              | SUGCT                                          | intronic       |
| 21  | 16799818  | G  | A           | rs7276764              | 7.76E-03        | 0.277     | 0.314        | 0.87       | 0.73 - 0.96 | 3.01E-05      | 0.276     | 0.320        | 0.81        | 0.71 - 0.92 | 0.76     | 2.59E-06                              | NRIP1(dist=362692), USP25(dist=302526)         | intergenic     |
| 16  | 7598511   | A  | G           | rs76208214             | 6.57E-06        | 0.025     | 0.055        | 0.45       | 0.31 - 0.64 | 2.17E-02      | 0.034     | 0.047        | 0.72        | 0.53 - 0.98 | 0.59     | 2.83E-06                              | RBFOX1                                         | intronic       |
| 6   | 153755461 | G  | A           | rs116820590            | 1.11E-02        | 0.042     | 0.029        | 1.43       | 1.03 - 1.99 | 2.68E-05      | 0.040     | 0.022        | 1.85        | 1.35 - 2.54 | 2.09     | 3.09E-06                              | MIR7641-2(dist=13800), OPRM1(dist=576170)      | intergenic     |
| 1   | 57229583  | T  | C           | rs17114291             | 5.83E-02        | 0.041     | 0.032        | 1.28       | 0.93 - 1.78 | 2.55E-06      | 0.065     | 0.045        | 1.47        | 1.15 - 1.88 | 2.07     | 3.72E-06                              | C1orf168                                       | intronic       |
| 16  | 7597886   | A  | T           | rs80029446             | 7.09E-06        | 0.026     | 0.056        | 0.45       | 0.31 - 0.64 | 2.82E-02      | 0.035     | 0.048        | 0.73        | 0.54 - 1    | 0.59     | 3.87E-06                              | RBFOX1                                         | intronic       |
| 2   | 25145173  | T  | A           | rs59086897             | 9.54E-03        | 0.192     | 0.204        | 1.08       | 0.92 - 1.26 | 4.54E-05      | 0.199     | 0.259        | 1.41        | 1.22 - 1.63 | 1.33     | 4.00E-06                              | ADCY3(dist=3118), DNAJC27(dist=21332)          | intergenic     |
| 1   | 67630341  | A  | T           | rs10889663             | 2.50E-02        | 0.299     | 0.331        | 0.87       | 0.76 - 0.99 | 1.19E-05      | 0.266     | 0.313        | 0.80        | 0.7 - 0.91  | 0.76     | 4.11E-06                              | C1orf141(dist=29687), IL23R(dist=1828)         | intergenic     |
| 13  | 97664072  | A  | G           | rs9584468              | 1.84E-02        | 0.078     | 0.061        | 1.29       | 1.01 - 1.64 | 1.73E-05      | 0.083     | 0.052        | 1.64        | 1.32 - 2.05 | 1.55     | 4.16E-06                              | OXGR1(dist=17468), LINC00456(dist=160564)      | intergenic     |
| 4   | 7057106   | G  | C           | rs10937782             | 4.13E-05        | 0.424     | 0.489        | 1.33       | 1.17 - 1.5  | 1.40E-02      | 0.436     | 0.459        | 1.10        | 0.98 - 1.24 | 1.23     | 4.26E-06                              | TADA2B(NM_152293;c.*325G>C)                    | UTR3           |
| 6   | 167541624 | T  | C           | rs41414848             | 2.88E-02        | 0.069     | 0.099        | 0.76       | 0.6 - 0.96  | 7.09E-06      | 0.068     | 0.068        | 0.58        | 0.44 - 0.77 | 0.64     | 4.42E-06                              | CCR6                                           | intronic       |
| 18  | 72212314  | C  | A           | rs147038768            | 4.64E-06        | 0.039     | 0.023        | 1.69       | 1.19 - 2.41 | 6.45E-01      | 0.027     | 0.028        | 0.98        | 0.68 - 1.41 | 3.38     | 4.70E-06                              | CNDP1                                          | intronic       |
| 3   | 64033043  | C  | T           | rs42456                | 1.25E-01        | 0.376     | 0.361        | 0.94       | 0.82 - 1.06 | 1.14E-06      | 0.423     | 0.358        | 0.76        | 0.68 - 0.86 | 0.80     | 4.93E-06                              | PSMD6(dist=23357), PRICKLE2-AS1(dist=20597)    | intergenic     |
| 13  | 97686626  | G  | A           | rs34085302             | 1.82E-02        | 0.076     | 0.060        | 1.30       | 1.02 - 1.66 | 2.98E-05      | 0.085     | 0.054        | 1.63        | 1.31 - 2.04 | 1.53     | 5.26E-06                              | OXGR1(dist=40022), LINC00456(dist=138010)      | intergenic     |
| 21  | 16800087  | C  | T           | rs7278277              | 1.85E-02        | 0.517     | 0.473        | 0.84       | 0.74 - 0.95 | 2.79E-05      | 0.516     | 0.476        | 0.85        | 0.76 - 0.96 | 0.78     | 5.49E-06                              | NRIP1(dist=362961), USP25(dist=302257)         | intergenic     |
| 4   | 106934908 | A  | C           | rs6854424              | 3.60E-05        | 0.055     | 0.033        | 1.71       | 1.27 - 2.3  | 2.75E-02      | 0.041     | 0.028        | 1.47        | 1.08 - 1.99 | 1.85     | 5.86E-06                              | LOC101929577, TBCK (dist=30566)                | ncRNA_intronic |
| 2   | 46188077  | G  | C           | rs6728240              | 4.04E-06        | 0.076     | 0.048        | 1.62       | 1.26 - 2.09 | 7.54E-01      | 0.056     | 0.054        | 1.05        | 0.81 - 1.35 | 2.14     | 6.05E-06                              | PRKCE                                          | intronic       |
| 1   | 183168489 | G  | A           | rs77484529             | 5.66E-05        | 0.047     | 0.030        | 1.60       | 1.16 - 2.2  | 1.59E-02      | 0.044     | 0.032        | 1.39        | 1.04 - 1.87 | 1.98     | 6.16E-06                              | LAMC2                                          | intronic       |
| 12  | 22992646  | A  | C           | rs7133927              | 3.12E-05        | 0.435     | 0.363        | 0.74       | 0.65 - 0.84 | 2.34E-02      | 0.425     | 0.404        | 0.92        | 0.82 - 1.03 | 0.80     | 6.54E-06                              | ETNK1(dist=149038), LOC101928441(dist=335924)  | intergenic     |
| 12  | 22992778  | A  | T           | rs2433643              | 3.42E-05        | 0.        |              |            |             |               |           |              |             |             |          |                                       |                                                |                |

|    |           |   |   |                       |          |       |       |      |      |       |          |       |       |      |      |       |      |          |                                                |                |
|----|-----------|---|---|-----------------------|----------|-------|-------|------|------|-------|----------|-------|-------|------|------|-------|------|----------|------------------------------------------------|----------------|
| 12 | 22992061  | A | C | rs2466871             | 2.29E-05 | 0.449 | 0.378 | 0.74 | 0.66 | -0.84 | 3.64E-02 | 0.439 | 0.421 | 0.93 | 0.82 | -1.04 | 0.80 | 9.22E-06 | ETNK1(dist=148453), LOC101928441(dist=336509)  | intergenic     |
| 16 | 7598054   | T | C | rs17144095            | 2.26E-05 | 0.031 | 0.059 | 0.51 | 0.36 | -0.71 | 2.84E-02 | 0.035 | 0.047 | 0.73 | 0.54 | -1    | 0.60 | 9.26E-06 | RBFOX1                                         | intronic       |
| 6  | 17086207  | A | G | rs9396749             | 4.50E-02 | 0.318 | 0.336 | 1.08 | 0.95 | -1.24 | 1.54E-05 | 0.307 | 0.380 | 1.39 | 1.22 | -1.57 | 1.24 | 9.37E-06 | ATXN1(dist=324486), STMND1(dist=16282)         | intergenic     |
| 8  | 103642111 | G | A | rs6998910             | 3.54E-02 | 0.033 | 0.026 | 1.27 | 0.88 | -1.82 | 6.43E-06 | 0.037 | 0.022 | 1.76 | 1.27 | -2.44 | 2.32 | 9.42E-06 | ODF1(dist=68866), KLF10(dist=18894)            | intergenic     |
| 13 | 97665992  | G | T | rs9582096             | 2.84E-02 | 0.077 | 0.061 | 1.28 | 1.01 | -1.63 | 3.15E-05 | 0.085 | 0.054 | 1.64 | 1.31 | -2.04 | 1.51 | 9.62E-06 | OXGR1(dist=19388), LINC00456(dist=158644)      | intergenic     |
| 12 | 22992924  | G | A | rs2466873             | 2.78E-05 | 0.437 | 0.365 | 0.74 | 0.65 | -0.84 | 3.42E-02 | 0.432 | 0.413 | 0.93 | 0.82 | -1.04 | 0.80 | 9.98E-06 | ETNK1(dist=149316), LOC101928441(dist=335646)  | intergenic     |
| 6  | 17085812  | C | G | rs9477319             | 4.46E-02 | 0.318 | 0.336 | 1.08 | 0.95 | -1.24 | 1.72E-05 | 0.307 | 0.380 | 1.38 | 1.22 | -1.57 | 1.23 | 1.01E-05 | ATXN1(dist=324091), STMND1(dist=16677)         | intergenic     |
| 19 | 20413113  | A | G | rs2336216             | 7.09E-02 | 0.306 | 0.289 | 1.09 | 0.95 | -1.25 | 6.23E-06 | 0.309 | 0.251 | 1.34 | 1.18 | -1.52 | 1.27 | 1.01E-05 | ZNF486(dist=101814), MIR1270(dist=96968)       | intergenic     |
| 10 | 51465920  | G | A | rs4043622             | 1.97E-06 | 0.241 | 0.183 | 1.42 | 1.22 | -1.64 | 8.56E-01 | 0.222 | 0.232 | 0.95 | 0.82 | -1.09 | 1.75 | 1.06E-05 | AGAP7P                                         | ncRNA_exonic   |
| 13 | 97668063  | A | G | rs10161685            | 2.98E-02 | 0.077 | 0.061 | 1.28 | 1    | -1.63 | 3.31E-05 | 0.085 | 0.054 | 1.64 | 1.31 | -2.04 | 1.50 | 1.06E-05 | OXGR1(dist=21459), LINC00456(dist=156573)      | intergenic     |
| 12 | 22992324  | A | T | rs540752718;rs2466872 | 3.31E-05 | 0.448 | 0.377 | 0.75 | 0.66 | -0.85 | 3.39E-02 | 0.438 | 0.418 | 0.92 | 0.82 | -1.04 | 0.80 | 1.07E-05 | ETNK1(dist=148716), LOC101928441(dist=336246)  | intergenic     |
| 2  | 225867366 | A | G | rs281527              | 4.66E-05 | 0.059 | 0.085 | 1.48 | 1.15 | -1.9  | 1.75E-02 | 0.084 | 0.108 | 1.31 | 1.06 | -1.61 | 1.46 | 1.10E-05 | DOCK10                                         | intronic       |
| 13 | 97682894  | T | G | rs11069252            | 3.21E-02 | 0.076 | 0.061 | 1.27 | 1    | -1.62 | 2.89E-05 | 0.085 | 0.054 | 1.64 | 1.31 | -2.04 | 1.51 | 1.11E-05 | OXGR1(dist=36290), LINC00456(dist=141742)      | intergenic     |
| 13 | 97675959  | C | T | rs12858533            | 3.22E-02 | 0.076 | 0.061 | 1.27 | 1    | -1.62 | 2.89E-05 | 0.085 | 0.054 | 1.64 | 1.31 | -2.04 | 1.51 | 1.11E-05 | OXGR1(dist=29355), LINC00456(dist=148677)      | intergenic     |
| 12 | 22993140  | A | G | rs2466875             | 3.45E-05 | 0.434 | 0.363 | 0.74 | 0.65 | -0.84 | 3.37E-02 | 0.427 | 0.408 | 0.92 | 0.82 | -1.04 | 0.80 | 1.15E-05 | ETNK1(dist=149532), LOC101928441(dist=335430)  | intergenic     |
| 13 | 97672631  | C | G | rs16953799            | 3.20E-02 | 0.076 | 0.061 | 1.27 | 1    | -1.62 | 3.28E-05 | 0.085 | 0.054 | 1.64 | 1.31 | -2.04 | 1.50 | 1.16E-05 | OXGR1(dist=26027), LINC00456(dist=152005)      | intergenic     |
| 12 | 22992839  | A | T | rs2467461             | 5.39E-05 | 0.439 | 0.370 | 0.75 | 0.66 | -0.85 | 2.56E-02 | 0.429 | 0.408 | 0.92 | 0.82 | -1.03 | 0.80 | 1.17E-05 | ETNK1(dist=149231), LOC101928441(dist=335731)  | intergenic     |
| 13 | 97684904  | C | T | rs9584472             | 3.29E-02 | 0.076 | 0.061 | 1.27 | 1    | -1.62 | 3.17E-05 | 0.084 | 0.053 | 1.63 | 1.31 | -2.04 | 1.50 | 1.22E-05 | OXGR1(dist=38300), LINC00456(dist=139732)      | intergenic     |
| 1  | 172869082 | C | T | rs4916198             | 7.23E-02 | 0.402 | 0.380 | 1.10 | 0.97 | -1.24 | 8.11E-06 | 0.433 | 0.368 | 1.31 | 1.17 | -1.48 | 1.23 | 1.26E-05 | FASLG(dist=233070), TNFSF18(dist=141278)       | intergenic     |
| 13 | 97692264  | A | G | rs35152259            | 3.47E-02 | 0.076 | 0.061 | 1.27 | 1    | -1.62 | 3.04E-05 | 0.085 | 0.054 | 1.63 | 1.31 | -2.03 | 1.50 | 1.27E-05 | OXGR1(dist=45660), LINC00456(dist=132372)      | intergenic     |
| 1  | 172866404 | T | C | rs12747422            | 3.34E-02 | 0.440 | 0.413 | 1.12 | 0.99 | -1.27 | 3.40E-05 | 0.464 | 0.403 | 1.28 | 1.14 | -1.44 | 1.23 | 1.27E-05 | FASLG(dist=230392), TNFSF18(dist=143956)       | intergenic     |
| 2  | 18448654  | G | T | rs10206460            | 5.21E-02 | 0.261 | 0.240 | 1.12 | 0.97 | -1.29 | 8.72E-06 | 0.269 | 0.208 | 1.40 | 1.22 | -1.6  | 1.27 | 1.30E-05 | KCNS3(dist=334429), RDH14(dist=287335)         | intergenic     |
| 12 | 22992389  | C | T | rs2467463             | 3.83E-05 | 0.449 | 0.379 | 0.75 | 0.66 | -0.85 | 8.38E-02 | 0.441 | 0.423 | 0.93 | 0.82 | -1.04 | 0.80 | 1.38E-05 | ETNK1(dist=148781), LOC101928441(dist=336181)  | intergenic     |
| 19 | 13719658  | C | T | rs114463198           | 7.50E-06 | 0.042 | 0.027 | 1.59 | 1.14 | -2.23 | 6.91E-01 | 0.024 | 0.023 | 1.02 | 0.69 | -1.5  | 3.14 | 1.39E-05 | CACNA1A(dist=102384), CCDC130(dist=139095)     | intergenic     |
| 6  | 142261391 | G | A | rs6920050             | 4.66E-02 | 0.271 | 0.299 | 0.87 | 0.76 | -1    | 2.32E-05 | 0.234 | 0.291 | 0.75 | 0.65 | -0.85 | 0.80 | 1.41E-05 | MIR4465(dist=1256371), NMBR(dist=135354)       | intergenic     |
| 15 | 99691010  | C | T | rs76019185            | 7.12E-02 | 0.049 | 0.065 | 0.75 | 0.57 | -0.99 | 1.83E-05 | 0.035 | 0.062 | 0.54 | 0.4  | -0.73 | 0.66 | 1.51E-05 | TTC23                                          | intronic       |
| 2  | 225870493 | T | C | rs2940191             | 3.51E-05 | 0.058 | 0.083 | 1.48 | 1.15 | -1.91 | 2.59E-02 | 0.082 | 0.104 | 1.30 | 1.06 | -1.61 | 1.46 | 1.52E-05 | DOCK10                                         | intronic       |
| 10 | 64649344  | A | T | rs76420112            | 5.16E-06 | 0.116 | 0.170 | 0.64 | 0.53 | -0.77 | 4.17E-02 | 0.131 | 0.146 | 0.88 | 0.74 | -1.05 | 0.74 | 1.54E-05 | EGR2(dist=70417), NRBF2(dist=243663)           | intergenic     |
| 20 | 3213378   | A | T | rs56660907            | 4.62E-02 | 0.093 | 0.081 | 1.16 | 0.94 | -1.45 | 2.47E-05 | 0.104 | 0.069 | 1.56 | 1.28 | -1.91 | 1.46 | 1.58E-05 | SLC4A11                                        | intronic       |
| 2  | 225866829 | A | G | rs281528              | 3.99E-05 | 0.055 | 0.080 | 1.51 | 1.16 | -1.95 | 2.55E-02 | 0.081 | 0.103 | 1.31 | 1.06 | -1.62 | 1.46 | 1.58E-05 | DOCK10                                         | intronic       |
| 11 | 5400971   | G | A | rs7948662             | 3.50E-02 | 0.322 | 0.354 | 0.87 | 0.76 | -0.99 | 5.42E-05 | 0.284 | 0.336 | 0.78 | 0.69 | -0.89 | 0.81 | 1.64E-05 | OR51B5                                         | intronic       |
| 12 | 23081130  | G | A | rs2467108             | 3.78E-05 | 0.265 | 0.201 | 1.44 | 1.24 | -1.66 | 3.25E-02 | 0.257 | 0.245 | 1.07 | 0.93 | -1.22 | 1.28 | 1.65E-05 | ETNK1(dist=237522), LOC101928441(dist=247440)  | intergenic     |
| 15 | 90482594  | A | T | rs7169779             | 2.29E-05 | 0.059 | 0.039 | 1.52 | 1.15 | -2.02 | 2.48E-01 | 0.065 | 0.069 | 0.94 | 0.74 | -1.19 | 2.25 | 1.71E-05 | C15orf38-AP3S2(dist=26372), ZNF710(dist=62129) | intergenic     |
| 6  | 142259390 | A | G | rs9389957             | 5.59E-02 | 0.276 | 0.303 | 0.88 | 0.76 | -1.01 | 2.12E-05 | 0.239 | 0.296 | 0.75 | 0.65 | -0.85 | 0.81 | 1.73E-05 | MIR4465(dist=1254370), NMBR(dist=137355)       | intergenic     |
| 6  | 142265773 | A | G | rs1252586             | 5.96E-02 | 0.275 | 0.302 | 0.88 | 0.76 | -1.01 | 1.90E-05 | 0.238 | 0.296 | 0.74 | 0.65 | -0.85 | 0.81 | 1.74E-05 | MIR4465(dist=1260753), NMBR(dist=130972)       | intergenic     |
| 6  | 142264851 | T | A | rs9399390             | 5.94E-02 | 0.275 | 0.302 | 0.88 | 0.76 | -1.01 | 1.91E-05 | 0.238 | 0.296 | 0.74 | 0.65 | -0.85 | 0.81 | 1.74E-05 | MIR4465(dist=1259831), NMBR(dist=131894)       | intergenic     |
| 6  | 142263542 | A | G | rs9373330             | 5.91E-02 | 0.275 | 0.302 | 0.88 | 0.76 | -1.01 | 1.93E-05 | 0.238 | 0.296 | 0.74 | 0.65 | -0.85 | 0.81 | 1.74E-05 | MIR4465(dist=1258522), NMBR(dist=133203)       | intergenic     |
| 3  | 105002806 | A | G | rs114417536           | 1.09E-05 | 0.075 | 0.046 | 1.67 | 1.29 | -2.16 | 1.11E-01 | 0.060 | 0.048 | 1.26 | 0.98 | -1.63 | 1.58 | 1.76E-05 | MIR548A3(dist=1056701), ALCAM(dist=82751)      | intergenic     |
| 3  | 105006813 | C | T | rs115537295           | 1.09E-05 | 0.075 | 0.046 | 1.67 | 1.29 | -2.16 | 1.11E-01 | 0.060 | 0.048 | 1.26 | 0.98 | -1.63 | 1.58 | 1.77E-05 | MIR548A3(dist=1060708), ALCAM(dist=78744)      | intergenic     |
| 6  | 142268395 | T | C | rs4486039             | 6.55E-02 | 0.279 | 0.306 | 0.88 | 0.77 | -1.01 | 1.65E-05 | 0.241 | 0.300 | 0.74 | 0.65 | -0.85 | 0.81 | 1.79E-05 | MIR4465(dist=1263375), NMBR(dist=128350)       | intergenic     |
| 6  | 142262201 | A | T | rs1819569             | 6.02E-02 | 0.275 | 0.302 | 0.88 | 0.77 | -1.01 | 1.97E-05 | 0.238 | 0.296 | 0.74 | 0.65 | -0.85 | 0.81 | 1.80E-05 | MIR4465(dist=1257181), NMBR(dist=134544)       | intergenic     |
| 2  | 18420493  | A | G | rs13422960            | 1.90E-01 | 0.189 | 0.183 | 1.04 | 0.89 | -1.22 | 8.48E-07 | 0.229 | 0.168 | 1.47 | 1.27 | -1.7  | 1.29 | 1.81E-05 | KCNS3(dist=306268), RDH14(dist=315496)         | intergenic     |
| 13 | 106143855 | C | T | rs12864685            | 4.26E-01 | 0.050 | 0.046 | 1.08 | 0.81 | -1.44 | 1.33E-05 | 0.052 | 0.041 | 1.26 | 0.96 | -1.65 | 2.77 | 1.85E-05 | DAOA-AS1                                       | ncRNA_intronic |
| 6  | 142245981 | T | C | rs9376660             | 4.84E-02 | 0.277 | 0.305 | 0.87 | 0.76 | -1    | 3.08E-05 | 0.243 | 0.299 | 0.75 | 0.66 | -0.86 | 0.81 | 1.90E-05 | MIR4465(dist=1240961), NMBR(dist=150764)       | intergenic     |
| 3  | 171166960 | G | T | rs55923799            | 5.54E-01 | 0.034 | 0.036 | 0.94 | 0.67 | -1.32 | 1.85E-05 | 0.044 | 0.031 | 1.45 | 1.08 | -1.95 | 3.21 | 1.92E-05 | TNIK                                           | intronic       |
| 15 | 99683043  | G | A | rs75392556            | 7.98E-02 | 0.050 | 0.065 | 0.76 | 0.58 | -0.99 | 2.05E-05 | 0.034 | 0.062 | 0.54 | 0.4  | -0.73 | 0.67 | 1.98E-05 | TTC23                                          | intronic       |
| 1  | 172868751 | C | T | rs35715673            | 7.36E-02 | 0.413 | 0.390 | 1.10 | 0.97 | -1.25 | 1.43E-05 | 0.445 | 0.380 | 1.31 | 1.16 | -1.47 | 1.22 | 1.98E-05 | FASLG(dist=232739), TNFSF18(dist=141609)       | intergenic     |
| 1  | 67672911  | C | T | rs7539643             | 4.85E-02 | 0.280 | 0.249 | 1.17 | 1.02 | -1.35 | 3.24E-05 | 0.299 | 0.247 | 1.31 | 1.15 | -1.49 | 1.25 | 2.01E-05 | IL23R                                          | intronic       |
| 6  | 142245750 | C | T | rs9389955             | 5.89E-02 | 0.274 | 0.302 | 0.88 | 0.76 | -1    | 2.40E-05 | 0.237 | 0.294 | 0.75 | 0.65 | -0.85 | 0.81 | 2.02E-05 | MIR4465(dist=1240730), NMBR(dist=150995)       | intergenic     |
| 2  | 103055420 | G | A | rs17027166            | 4.87E-02 | 0.195 | 0.217 | 0.87 | 0.75 | -1.02 | 2.83E-05 | 0.178 | 0.228 | 0.73 | 0.63 | -0.85 | 0.79 | 2.07E-05 | IL18RAP                                        | intronic       |
| 1  | 12854930  | T | G | rs2744046             | 7.02E-02 | 0.229 | 0.203 | 1.16 | 1    | -1.35 | 1.46E-05 | 0.242 | 0.202 | 1.26 | 1.1  | -1.45 | 1.30 | 2.13E-05 | PRAMEF1(NM_001294139;c.-58T>G)                 | UTR5           |
| 11 | 110735980 | T | G | rs11600056            | 2.58E-01 | 0.187 | 0.196 | 0.94 | 0.81 | -1.1  | 7.05E-07 | 0.127 | 0.183 | 0.65 | 0.54 | -0.77 | 0.78 | 2.18E-05 | ARHGAP20(dist=152068), C11orf53(dist=390727)   | intergenic     |
| 11 | 125621914 | A | C | rs514807              | 7.10E-02 | 0.108 | 0.091 | 1.02 | 0.67 | -1.01 | 2.32E-05 | 0.128 | 0.096 | 0.72 | 0.6  | -0.86 | 0.72 | 2.22E-05 | PATE1(dist=2171), PATE2(dist=24114)            | intergenic     |
| 2  | 18465890  | G | A | rs6726057             | 2.51E-01 | 0.305 | 0.297 | 1.04 | 0.91 | -1.19 | 4.68E-07 | 0.346 | 0.269 | 1.43 | 1.27 | -1.62 | 1.24 | 2.23E-05 | KCNS3(dist=351665), RDH14(dist=270099)         | intergenic     |
| 11 | 125621991 | T | C | rs578915              | 7.24E-02 | 0.108 | 0.091 | 0.82 | 0.67 | -1.01 | 2.34E-05 | 0.129 | 0.096 | 0.72 | 0.6  | -0.86 | 0.72 | 2.30E-05 | PATE1(dist=2248), PATE2(dist=24037)            | intergenic     |
| 6  | 142266402 | A | G | rs9385982             | 5.67E-02 | 0.272 | 0.299 | 0.88 | 0.76 | -1.01 | 3.09E-05 |       |       |      |      |       |      |          |                                                |                |

|    |           |   |   |                       |          |       |       |      |      |       |          |       |       |      |      |       |      |          |                                               |            |
|----|-----------|---|---|-----------------------|----------|-------|-------|------|------|-------|----------|-------|-------|------|------|-------|------|----------|-----------------------------------------------|------------|
| 11 | 125621220 | T | C | rs497125              | 7.09E-02 | 0.108 | 0.091 | 0.82 | 0.67 | -1.01 | 2.85E-05 | 0.129 | 0.096 | 0.72 | 0.6  | -0.86 | 0.72 | 2.54E-05 | PATE1(dist=1477), PATE2(dist=24808)           | intergenic |
| 1  | 184576687 | A | G | rs10911621            | 3.06E-05 | 0.273 | 0.218 | 1.35 | 1.17 | -1.56 | 5.40E-02 | 0.262 | 0.233 | 1.17 | 1.02 | -1.34 | 1.25 | 2.55E-05 | C1orf21                                       | intronic   |
| 2  | 18448477  | A | G | rs10195586            | 1.32E-01 | 0.121 | 0.108 | 1.13 | 0.93 | -1.37 | 2.93E-06 | 0.146 | 0.101 | 1.52 | 1.28 | -1.8  | 1.36 | 2.55E-05 | KCNS3(dist=334252), RDH14(dist=287512)        | intergenic |
| 13 | 109500374 | C | T | rs1475142             | 1.67E-05 | 0.397 | 0.333 | 0.76 | 0.67 | -0.86 | 1.30E-01 | 0.368 | 0.353 | 0.94 | 0.83 | -1.06 | 0.80 | 2.55E-05 | MYO16                                         | intronic   |
| 15 | 99693488  | T | G | rs116407582           | 9.41E-02 | 0.051 | 0.065 | 0.77 | 0.59 | -1.01 | 2.23E-05 | 0.036 | 0.064 | 0.55 | 0.41 | -0.74 | 0.67 | 2.60E-05 | TTC23                                         | intronic   |
| 2  | 110263094 | A | T | rs71425251            | 4.35E-02 | 0.080 | 0.066 | 1.23 | 0.98 | -1.56 | 5.25E-05 | 0.109 | 0.082 | 1.38 | 1.14 | -1.67 | 1.54 | 2.69E-05 | SH3RF3                                        | downstream |
| 2  | 103056096 | A | G | rs56166614            | 6.55E-02 | 0.208 | 0.230 | 0.88 | 0.76 | -1.02 | 2.45E-05 | 0.186 | 0.238 | 0.73 | 0.63 | -0.85 | 0.80 | 2.85E-05 | IL18RAP                                       | intronic   |
| 15 | 99717369  | C | T | rs115781951           | 1.09E-01 | 0.053 | 0.068 | 0.77 | 0.59 | -1.01 | 1.83E-05 | 0.039 | 0.067 | 0.56 | 0.42 | -0.75 | 0.68 | 2.92E-05 | TTC23                                         | intronic   |
| 15 | 99700233  | T | G | rs114815684           | 1.16E-01 | 0.050 | 0.063 | 0.77 | 0.59 | -1.02 | 1.79E-05 | 0.035 | 0.063 | 0.54 | 0.4  | -0.73 | 0.67 | 2.97E-05 | TTC23                                         | intronic   |
| 7  | 49756509  | G | A | rs6964816             | 7.21E-02 | 0.048 | 0.040 | 1.21 | 0.9  | -1.64 | 8.67E-06 | 0.055 | 0.033 | 1.72 | 1.31 | -2.25 | 1.74 | 3.05E-05 | CDC14C(dist=789460), VWC2(dist=56748)         | intergenic |
| 7  | 49753861  | G | A | rs115617084           | 7.25E-02 | 0.048 | 0.040 | 1.21 | 0.9  | -1.63 | 9.11E-06 | 0.055 | 0.033 | 1.71 | 1.3  | -2.24 | 1.74 | 3.10E-05 | CDC14C(dist=786812), VWC2(dist=59396)         | intergenic |
| 15 | 99687470  | A | C | rs111601164           | 1.75E-01 | 0.069 | 0.079 | 0.86 | 0.68 | -1.1  | 7.95E-06 | 0.050 | 0.083 | 0.58 | 0.45 | -0.76 | 0.70 | 3.13E-05 | TTC23                                         | intronic   |
| 2  | 103055661 | C | T | rs55645612            | 7.04E-02 | 0.208 | 0.230 | 0.88 | 0.76 | -1.03 | 2.42E-05 | 0.186 | 0.238 | 0.73 | 0.63 | -0.85 | 0.80 | 3.14E-05 | IL18RAP                                       | intronic   |
| 3  | 5589614   | A | G | rs72998680            | 1.72E-01 | 0.190 | 0.173 | 1.12 | 0.96 | -1.32 | 7.57E-06 | 0.231 | 0.184 | 1.34 | 1.16 | -1.54 | 1.29 | 3.18E-05 | MIR4790(dist=297674), GRM7-AS3(dist=1084431)  | intergenic |
| 1  | 12856982  | A | G | rs1736770             | 7.78E-02 | 0.247 | 0.219 | 1.17 | 1.01 | -1.35 | 2.78E-05 | 0.268 | 0.226 | 1.25 | 1.1  | -1.43 | 1.27 | 3.19E-05 | PRAMEF1                                       | downstream |
| 15 | 99671806  | G | A | rs115301553           | 1.02E-01 | 0.050 | 0.064 | 0.77 | 0.58 | -1.01 | 2.93E-05 | 0.036 | 0.063 | 0.56 | 0.41 | -0.75 | 0.67 | 3.27E-05 | SYNM                                          | exonic     |
| 15 | 99736784  | C | T | rs79418549            | 1.25E-01 | 0.050 | 0.064 | 0.77 | 0.59 | -1.02 | 1.91E-05 | 0.036 | 0.064 | 0.55 | 0.4  | -0.74 | 0.68 | 3.30E-05 | TTC23                                         | intronic   |
| 2  | 103057159 | C | T | rs17027179            | 7.21E-02 | 0.208 | 0.230 | 0.88 | 0.76 | -1.03 | 2.52E-05 | 0.186 | 0.238 | 0.73 | 0.63 | -0.85 | 0.80 | 3.32E-05 | IL18RAP                                       | intronic   |
| 15 | 99703039  | C | T | rs140951063           | 1.25E-01 | 0.050 | 0.063 | 0.78 | 0.59 | -1.02 | 1.79E-05 | 0.035 | 0.063 | 0.54 | 0.4  | -0.73 | 0.68 | 3.33E-05 | TTC23                                         | intronic   |
| 11 | 125621696 | T | C | rs516661              | 7.77E-02 | 0.130 | 0.111 | 0.84 | 0.7  | -1.01 | 3.42E-05 | 0.155 | 0.124 | 0.77 | 0.65 | -0.91 | 0.73 | 3.33E-05 | PATE1(dist=1953), PATE2(dist=24332)           | intergenic |
| 15 | 99703600  | T | A | rs114667414           | 1.26E-01 | 0.050 | 0.063 | 0.78 | 0.59 | -1.02 | 1.79E-05 | 0.035 | 0.063 | 0.54 | 0.4  | -0.73 | 0.68 | 3.33E-05 | TTC23                                         | intronic   |
| 11 | 100742862 | T | A | rs10750596            | 8.18E-02 | 0.307 | 0.288 | 0.91 | 0.8  | -1.05 | 2.60E-05 | 0.334 | 0.276 | 0.76 | 0.67 | -0.86 | 0.81 | 3.35E-05 | ARHGAP42                                      | intronic   |
| 20 | 12448314  | A | G | rs6041369             | 1.63E-05 | 0.171 | 0.131 | 1.37 | 1.15 | -1.62 | 8.91E-02 | 0.157 | 0.135 | 1.20 | 1.02 | -1.41 | 1.33 | 3.36E-05 | BTBD3(dist=541071), LOC101929486(dist=397538) | intergenic |
| 15 | 99708259  | C | T | rs75280345            | 1.28E-01 | 0.050 | 0.064 | 0.78 | 0.59 | -1.03 | 1.77E-05 | 0.036 | 0.064 | 0.54 | 0.4  | -0.73 | 0.68 | 3.37E-05 | TTC23                                         | intronic   |
| 15 | 99729253  | T | G | rs182263465           | 1.29E-01 | 0.050 | 0.064 | 0.78 | 0.59 | -1.02 | 1.86E-05 | 0.036 | 0.064 | 0.54 | 0.4  | -0.74 | 0.68 | 3.40E-05 | TTC23                                         | intronic   |
| 15 | 99728222  | T | C | rs74760586            | 1.29E-01 | 0.050 | 0.064 | 0.78 | 0.59 | -1.02 | 1.84E-05 | 0.036 | 0.064 | 0.54 | 0.4  | -0.74 | 0.68 | 3.42E-05 | TTC23                                         | intronic   |
| 15 | 99724296  | C | T | rs114556713           | 1.31E-01 | 0.050 | 0.064 | 0.78 | 0.59 | -1.03 | 1.81E-05 | 0.036 | 0.064 | 0.54 | 0.4  | -0.74 | 0.68 | 3.48E-05 | TTC23                                         | intronic   |
| 19 | 20415185  | A | G | rs75343420            | 1.43E-01 | 0.302 | 0.288 | 1.07 | 0.93 | -1.22 | 8.77E-06 | 0.308 | 0.251 | 1.33 | 1.17 | -1.51 | 1.25 | 3.57E-05 | ZNF486(dist=103886), MIR1270(dist=94896)      | intergenic |
| 2  | 103058803 | C | T | rs11123927            | 7.60E-02 | 0.208 | 0.229 | 0.88 | 0.76 | -1.03 | 2.60E-05 | 0.186 | 0.237 | 0.73 | 0.63 | -0.85 | 0.80 | 3.64E-05 | IL18RAP                                       | intronic   |
| 11 | 100737731 | T | A | rs1943501             | 7.05E-02 | 0.318 | 0.298 | 0.91 | 0.8  | -1.04 | 4.21E-05 | 0.347 | 0.289 | 0.77 | 0.68 | -0.87 | 0.81 | 3.68E-05 | ARHGAP42                                      | intronic   |
| 2  | 103059237 | T | G | rs10490203            | 7.67E-02 | 0.208 | 0.229 | 0.88 | 0.76 | -1.03 | 2.67E-05 | 0.186 | 0.237 | 0.73 | 0.63 | -0.85 | 0.80 | 3.75E-05 | IL18RAP                                       | intronic   |
| 11 | 125619227 | G | A | rs568195              | 7.29E-02 | 0.109 | 0.091 | 0.82 | 0.67 | -1    | 4.83E-05 | 0.130 | 0.097 | 0.72 | 0.6  | -0.86 | 0.73 | 3.87E-05 | PATE1(NM_138294:c.*599G>A)                    | UTR3       |
| 1  | 12857814  | C | T | rs1614814             | 8.88E-02 | 0.247 | 0.220 | 1.16 | 1.01 | -1.35 | 2.98E-05 | 0.267 | 0.225 | 1.25 | 1.1  | -1.43 | 1.26 | 4.00E-05 | PRAMEF1(dist=1037), PRAMEF11(dist=26804)      | intergenic |
| 10 | 55226154  | T | G | rs4935440             | 1.16E-01 | 0.104 | 0.085 | 1.25 | 1.02 | -1.55 | 1.17E-05 | 0.108 | 0.080 | 1.40 | 1.15 | -1.69 | 1.45 | 4.02E-05 | MBL2(dist=694694), PCDH15(dist=336379)        | intergenic |
| 2  | 18418256  | G | A | rs10206173            | 1.86E-01 | 0.134 | 0.126 | 1.07 | 0.89 | -1.29 | 2.77E-06 | 0.169 | 0.121 | 1.48 | 1.26 | -1.74 | 1.33 | 4.03E-05 | KCNS3(dist=304031), RDH14(dist=317733)        | intergenic |
| 5  | 25308266  | G | A | rs191517305           | 5.33E-01 | 0.031 | 0.030 | 1.03 | 0.72 | -1.48 | 2.12E-05 | 0.050 | 0.033 | 1.54 | 1.16 | -2.04 | 2.68 | 4.05E-05 | LOC340107(dist=467574), CDH9(dist=1572443)    | intergenic |
| 14 | 85308328  | A | G | rs17120306            | 4.85E-07 | 0.053 | 0.032 | 1.68 | 1.24 | -2.27 | 5.38E-01 | 0.029 | 0.026 | 1.12 | 0.79 | -1.6  | 2.01 | 4.15E-05 | NONE(dist=NONE), LINC00911(dist=551895)       | intergenic |
| 2  | 18416928  | C | G | rs11898461            | 1.84E-01 | 0.134 | 0.126 | 1.07 | 0.89 | -1.29 | 2.83E-06 | 0.169 | 0.121 | 1.48 | 1.26 | -1.74 | 1.33 | 4.16E-05 | KCNS3(dist=302703), RDH14(dist=319061)        | intergenic |
| 2  | 18421964  | T | G | rs13432352            | 1.92E-01 | 0.134 | 0.126 | 1.07 | 0.89 | -1.29 | 2.63E-06 | 0.169 | 0.121 | 1.48 | 1.26 | -1.74 | 1.33 | 4.21E-05 | KCNS3(dist=307739), RDH14(dist=314025)        | intergenic |
| 16 | 87835224  | C | G | rs58424110            | 2.37E-05 | 0.322 | 0.260 | 1.36 | 1.18 | -1.55 | 3.68E-01 | 0.352 | 0.376 | 0.90 | 0.8  | -1.02 | 1.46 | 4.24E-05 | LOC102724467(dist=22470), SLC7A5(dist=28405)  | intergenic |
| 2  | 18420372  | T | C | rs13425583            | 1.93E-01 | 0.133 | 0.126 | 1.07 | 0.89 | -1.29 | 2.63E-06 | 0.169 | 0.121 | 1.48 | 1.26 | -1.74 | 1.33 | 4.26E-05 | KCNS3(dist=306147), RDH14(dist=315617)        | intergenic |
| 9  | 115701601 | T | C | rs75092738            | 1.32E-01 | 0.033 | 0.026 | 1.28 | 0.89 | -1.83 | 1.01E-05 | 0.050 | 0.031 | 1.65 | 1.24 | -2.18 | 1.90 | 4.28E-05 | SLC46A2(dist=48408), ZNF883(dist=57799)       | intergenic |
| 10 | 64477836  | G | A | rs224143              | 6.91E-02 | 0.249 | 0.210 | 0.80 | 0.69 | -0.93 | 6.36E-05 | 0.279 | 0.237 | 0.80 | 0.7  | -0.92 | 0.79 | 4.28E-05 | ZNF365(dist=46065), ADO(dist=86680)           | intergenic |
| 3  | 192682466 | G | A | rs184225255           | 4.71E-05 | 0.038 | 0.025 | 1.53 | 1.08 | -2.17 | 7.67E-01 | 0.025 | 0.025 | 1.02 | 0.7  | -1.48 | 3.25 | 4.29E-05 | MB21D2(dist=46516), HRASLS(dist=276451)       | intergenic |
| 7  | 49807446  | G | A | rs115230173           | 7.05E-02 | 0.044 | 0.036 | 1.22 | 0.89 | -1.66 | 5.36E-06 | 0.043 | 0.023 | 1.87 | 1.37 | -2.54 | 1.78 | 4.32E-05 | CDC14C(dist=840397), VWC2(dist=5811)          | intergenic |
| 13 | 109502665 | A | G | rs9301328             | 1.96E-05 | 0.393 | 0.330 | 0.76 | 0.67 | -0.86 | 1.75E-01 | 0.369 | 0.357 | 0.95 | 0.84 | -1.07 | 0.80 | 4.32E-05 | MYO16                                         | intronic   |
| 1  | 201919674 | C | T | rs2790898             | 2.35E-05 | 0.142 | 0.178 | 0.76 | 0.64 | -0.91 | 8.43E-02 | 0.168 | 0.197 | 0.82 | 0.7  | -0.96 | 0.77 | 4.35E-05 | LMOD1(dist=3958), TIMM17A(dist=4945)          | intergenic |
| 7  | 49797890  | T | G | rs143179427           | 3.68E-02 | 0.053 | 0.043 | 1.23 | 0.92 | -1.64 | 4.91E-05 | 0.051 | 0.031 | 1.68 | 1.27 | -2.23 | 1.68 | 4.55E-05 | CDC14C(dist=830841), VWC2(dist=15367)         | intergenic |
| 2  | 18404520  | C | T | rs13390392            | 1.78E-01 | 0.133 | 0.125 | 1.07 | 0.89 | -1.29 | 3.79E-06 | 0.171 | 0.123 | 1.47 | 1.25 | -1.72 | 1.33 | 4.57E-05 | KCNS3(dist=290295), RDH14(dist=331469)        | intergenic |
| 12 | 22992541  | C | A | rs2433642             | 2.32E-05 | 0.472 | 0.401 | 0.75 | 0.66 | -0.85 | 1.14E-01 | 0.468 | 0.453 | 0.94 | 0.84 | -1.06 | 0.82 | 4.63E-05 | ETNK1(dist=148933), LOC101928441(dist=336029) | intergenic |
| 17 | 78354661  | C | T | rs4889848             | 1.17E-01 | 0.052 | 0.037 | 0.70 | 0.52 | -0.95 | 1.61E-05 | 0.107 | 0.086 | 0.79 | 0.65 | -0.95 | 0.64 | 4.64E-05 | RNF213                                        | exonic     |
| 11 | 115655434 | T | C | rs1393275:rs386757738 | 5.15E-02 | 0.256 | 0.240 | 1.09 | 0.95 | -1.26 | 6.28E-05 | 0.257 | 0.205 | 1.34 | 1.17 | -1.54 | 1.26 | 4.66E-05 | LINC00900(dist=24516), BUD13(dist=963452)     | intergenic |
| 17 | 32786450  | A | G | rs12951119            | 4.37E-05 | 0.140 | 0.103 | 1.42 | 1.18 | -1.71 | 1.24E-01 | 0.124 | 0.141 | 0.86 | 0.73 | -1.03 | 1.77 | 4.75E-05 | CCL1(dist=96198), C17orf102(dist=114692)      | intergenic |
| 2  | 18411082  | A | T | rs10189664            | 1.85E-01 | 0.134 | 0.126 | 1.07 | 0.89 | -1.29 | 3.48E-06 | 0.169 | 0.121 | 1.48 | 1.26 | -1.73 | 1.33 | 4.78E-05 | KCNS3(dist=296857), RDH14(dist=324907)        | intergenic |
| 4  | 8000943   | C | T | rs34336913            | 4.52E-05 | 0.023 | 0.041 | 0.54 | 0.37 | -0.8  | 3.39E-01 | 0.042 | 0.042 | 1.01 | 0.76 | -1.36 | 0.43 | 4.78E-05 | ABLIM2                                        | intronic   |
| 11 | 125609409 | T | A | rs550623              | 7.44E-02 | 0.110 | 0.091 | 0.82 | 0.67 | -1    | 5.89E-05 | 0.128 | 0.096 | 0.73 | 0.61 | -0.87 | 0.74 | 4.83E-05 | ACRV1(dist=58616), PATE1(dist=6779)           | intergenic |
| 11 | 125617467 | G | T | rs495356              | 8.23E-02 | 0.108 | 0.091 | 0.82 | 0.67 | -1.01 | 5.31E-05 | 0.129 | 0.097 | 0.72 | 0.6  | -0.87 | 0.74 | 4.84E-05 | PATE1                                         | intronic   |

|    |           |   |   |                        |          |       |       |      |      |       |          |       |       |      |        |       |      |          |                                               |              |
|----|-----------|---|---|------------------------|----------|-------|-------|------|------|-------|----------|-------|-------|------|--------|-------|------|----------|-----------------------------------------------|--------------|
| 11 | 125616502 | T | A | rs2553829              | 7.88E-02 | 0.109 | 0.091 | 0.82 | 0.67 | -1.01 | 5.85E-05 | 0.129 | 0.097 | 0.72 | 0.61   | -0.87 | 0.74 | 5.01E-05 | PATE1                                         | intronic     |
| 11 | 125615464 | C | T | rs489063               | 7.74E-02 | 0.110 | 0.092 | 0.82 | 0.67 | -1.01 | 6.15E-05 | 0.129 | 0.097 | 0.73 | 0.61   | -0.87 | 0.74 | 5.03E-05 | PATE1                                         | upstream     |
| 16 | 87818569  | G | A | rs6540080              | 2.85E-05 | 0.125 | 0.082 | 1.61 | 1.31 | -1.96 | 7.82E-01 | 0.149 | 0.160 | 0.92 | 0.78   | -1.09 | 1.74 | 5.05E-05 | LOC102724467(dist=5815), SLC7A5(dist=45060)   | intergenic   |
| 11 | 125605212 | C | T | rs2553841              | 7.56E-02 | 0.109 | 0.091 | 0.82 | 0.67 | -1    | 6.07E-05 | 0.128 | 0.096 | 0.73 | 0.61   | -0.87 | 0.74 | 5.05E-05 | ACRV1(dist=54419), PATE1(dist=10976)          | intergenic   |
| 11 | 125614352 | T | C | rs560146               | 7.67E-02 | 0.110 | 0.091 | 0.82 | 0.67 | -1    | 6.11E-05 | 0.128 | 0.097 | 0.73 | 0.61   | -0.87 | 0.74 | 5.10E-05 | ACRV1(dist=63559), PATE1(dist=1836)           | intergenic   |
| 11 | 125614173 | A | G | rs472524               | 7.63E-02 | 0.110 | 0.091 | 0.82 | 0.67 | -1    | 6.19E-05 | 0.129 | 0.097 | 0.73 | 0.61   | -0.87 | 0.74 | 5.11E-05 | ACRV1(dist=63380), PATE1(dist=2015)           | intergenic   |
| 10 | 67779314  | T | A | rs114182315            | 2.71E-01 | 0.030 | 0.028 | 1.09 | 0.76 | -1.57 | 5.72E-06 | 0.044 | 0.024 | 1.91 | 1.4    | -2.59 | 1.87 | 5.16E-05 | CTNNA3                                        | intronic     |
| 4  | 58622776  | G | T | rs113284537            | 3.71E-01 | 0.045 | 0.040 | 1.13 | 0.83 | -1.54 | 7.11E-07 | 0.055 | 0.028 | 2.05 | 1.55   | -2.7  | 1.62 | 5.16E-05 | LOC101928851(dist=290624), NONE(dist=NONE)    | intergenic   |
| 11 | 125603301 | G | A | rs549994               | 7.63E-02 | 0.109 | 0.091 | 0.82 | 0.67 | -1    | 6.18E-05 | 0.128 | 0.096 | 0.73 | 0.61   | -0.87 | 0.74 | 5.18E-05 | ACRV1(dist=52508), PATE1(dist=12887)          | intergenic   |
| 11 | 5434873   | T | C | rs4910559              | 2.28E-01 | 0.399 | 0.396 | 0.99 | 0.87 | -1.12 | 5.63E-06 | 0.440 | 0.369 | 0.74 | 0.66   | -0.84 | 0.82 | 5.26E-05 | OR51B5                                        | intronic     |
| 19 | 10135284  | T | C | rs2431820              | 3.10E-05 | 0.136 | 0.110 | 1.27 | 1.06 | -1.54 | 6.95E-01 | 0.107 | 0.102 | 1.06 | 0.87   | -1.28 | 1.73 | 5.30E-05 | RDH8(dist=2330), MIR5589(dist=13746)          | intergenic   |
| 17 | 32115606  | T | C | rs77348305             | 4.96E-05 | 0.055 | 0.032 | 1.74 | 1.29 | -2.34 | 8.37E-01 | 0.059 | 0.063 | 0.93 | 0.73   | -1.19 | 2.43 | 5.39E-05 | ASIC2                                         | intronic     |
| 11 | 125606641 | T | G | rs515840               | 7.93E-02 | 0.110 | 0.091 | 0.82 | 0.67 | -1    | 6.07E-05 | 0.128 | 0.097 | 0.73 | 0.61   | -0.87 | 0.74 | 5.40E-05 | ACRV1(dist=55848), PATE1(dist=9547)           | intergenic   |
| 2  | 110267222 | G | T | rs71425254             | 7.76E-02 | 0.074 | 0.061 | 1.23 | 0.97 | -1.57 | 5.17E-05 | 0.103 | 0.076 | 1.39 | 1.14   | -1.7  | 1.51 | 5.57E-05 | SH3RF3(dist=5009), SEPT10(dist=33152)         | intergenic   |
| 15 | 99661412  | T | C | rs76915137             | 1.90E-01 | 0.053 | 0.065 | 0.81 | 0.62 | -1.06 | 1.17E-05 | 0.037 | 0.065 | 0.56 | 0.41   | -0.75 | 0.68 | 5.60E-05 | SYNM                                          | intronic     |
| 1  | 12865578  | C | T | rs2819611              | 7.49E-02 | 0.251 | 0.222 | 1.17 | 1.01 | -1.35 | 5.12E-05 | 0.277 | 0.238 | 1.23 | 1.08   | -1.4  | 1.25 | 5.66E-05 | PRAMEF1(dist=8801), PRAMEF11(dist=19040)      | intergenic   |
| 9  | 14233184  | G | A | rs79603924             | 9.05E-02 | 0.035 | 0.029 | 1.19 | 0.84 | -1.69 | 5.38E-05 | 0.046 | 0.029 | 1.64 | 1.23   | -2.2  | 1.93 | 5.67E-05 | NFIB                                          | intronic     |
| 14 | 76477246  | C | A | rs10146195             | 1.56E-01 | 0.225 | 0.211 | 0.92 | 0.79 | -1.07 | 1.94E-05 | 0.263 | 0.220 | 0.79 | 0.69   | -0.91 | 0.77 | 5.69E-05 | IFT43                                         | intronic     |
| 20 | 62412904  | G | A | rs6011110              | 8.71E-02 | 0.268 | 0.245 | 1.13 | 0.98 | -1.3  | 3.90E-05 | 0.290 | 0.241 | 1.28 | 1.13   | -1.46 | 1.25 | 5.82E-05 | ZBTB46                                        | intronic     |
| 2  | 18416404  | G | A | rs11886016             | 2.55E-01 | 0.139 | 0.133 | 1.05 | 0.88 | -1.26 | 1.78E-06 | 0.173 | 0.124 | 1.49 | 1.27   | -1.74 | 1.32 | 5.86E-05 | KCNS3(dist=302179), RDH14(dist=319585)        | intergenic   |
| 10 | 52717885  | A | G | rs7097894              | 1.04E-05 | 0.248 | 0.178 | 1.53 | 1.32 | -1.77 | 8.26E-02 | 0.240 | 0.233 | 1.04 | 0.9    | -1.19 | 1.30 | 5.90E-05 | A1CF(dist=72450), PRKG1(dist=33026)           | intergenic   |
| 1  | 172870004 | C | T | rs4145468              | 1.10E-01 | 0.477 | 0.459 | 1.08 | 0.95 | -1.22 | 3.33E-05 | 0.508 | 0.440 | 1.31 | 1.17   | -1.47 | 1.20 | 5.91E-05 | FASLG(dist=233992), TNFSF18(dist=140356)      | intergenic   |
| 6  | 16771473  | A | G | rs9477215              | 4.44E-05 | 0.102 | 0.079 | 1.33 | 1.07 | -1.64 | 8.74E-01 | 0.075 | 0.075 | 1.00 | 0.8    | -1.25 | 1.92 | 5.94E-05 | ATXN1(dist=9752), STMND1(dist=331016)         | intergenic   |
| 18 | 54724750  | C | T | rs115482094            | 6.26E-05 | 0.014 | 0.034 | 0.40 | 0.25 | -0.65 | 1.08E-01 | 0.018 | 0.024 | 0.75 | 0.49   | -1.15 | 0.55 | 5.95E-05 | LINC-ROR                                      | ncRNA_exonic |
| 15 | 99763323  | C | T | rs2861374              | 1.28E-01 | 0.054 | 0.068 | 0.78 | 0.6  | -1.01 | 4.42E-05 | 0.038 | 0.065 | 0.56 | 0.42   | -0.75 | 0.69 | 5.96E-05 | ITTC23                                        | intronic     |
| 1  | 172869674 | G | T | rs12025176             | 1.08E-01 | 0.477 | 0.459 | 1.08 | 0.95 | -1.22 | 3.50E-05 | 0.507 | 0.440 | 1.31 | 1.16   | -1.47 | 1.20 | 5.96E-05 | FASLG(dist=233662), TNFSF18(dist=140686)      | intergenic   |
| 10 | 127750268 | A | G | rs115386251            | 2.99E-06 | 0.040 | 0.021 | 1.93 | 1.35 | -2.76 | 1.31E-01 | 0.036 | 0.028 | 1.29 | 0.94   | -1.78 | 1.92 | 6.16E-05 | ADAM12                                        | intronic     |
| 5  | 5813344   | C | T | rs114394118            | 5.45E-05 | 0.030 | 0.054 | 0.54 | 0.39 | -0.76 | 4.05E-01 | 0.048 | 0.042 | 1.15 | 0.87   | -1.52 | 0.47 | 6.18E-05 | ICE1(dist=322997), FLJ33360(dist=497210)      | intergenic   |
| 4  | 59451731  | T | C | rs282746               | 2.04E-01 | 0.098 | 0.104 | 0.93 | 0.76 | -1.14 | 1.79E-05 | 0.076 | 0.120 | 0.60 | 0.49   | -1.74 | 0.74 | 6.19E-05 | LOC101928851(dist=119579), NONE(dist=NONE)    | intergenic   |
| 16 | 85065085  | A | G | rs7499978              | 1.43E-01 | 0.489 | 0.471 | 1.07 | 0.95 | -1.21 | 1.91E-05 | 0.519 | 0.459 | 1.27 | 1.13   | -1.43 | 1.22 | 6.23E-05 | KIAA0513                                      | intronic     |
| 2  | 18397856  | T | A | rs149857943            | 1.90E-01 | 0.132 | 0.125 | 1.07 | 0.89 | -1.28 | 4.63E-06 | 0.166 | 0.119 | 1.47 | 1.25   | -1.73 | 1.33 | 6.23E-05 | KCNS3(dist=283631), RDH14(dist=338133)        | intergenic   |
| 1  | 172881927 | G | C | rs2187893              | 8.46E-02 | 0.425 | 0.402 | 1.10 | 0.97 | -1.25 | 5.58E-05 | 0.457 | 0.398 | 1.27 | 1.13   | -1.43 | 1.20 | 6.25E-05 | FASLG(dist=245915), TNFSF18(dist=128433)      | intergenic   |
| 13 | 109500511 | A | G | rs1475141              | 1.77E-05 | 0.399 | 0.334 | 0.76 | 0.67 | -0.86 | 2.33E-01 | 0.372 | 0.361 | 0.95 | 0.84   | -1.07 | 0.81 | 6.28E-05 | MYO16                                         | intronic     |
| 14 | 30730863  | T | C | rs57816211             | 3.63E-01 | 0.035 | 0.042 | 0.82 | 0.59 | -1.14 | 8.13E-07 | 0.013 | 0.036 | 0.35 | 0.22   | -0.58 | 0.61 | 6.31E-05 | PRKD1(dist=333964), G2E3(dist=297466)         | intergenic   |
| 2  | 18399680  | G | A | rs10178572             | 1.85E-01 | 0.133 | 0.125 | 1.07 | 0.89 | -1.29 | 5.32E-06 | 0.167 | 0.121 | 1.46 | 1.25   | -1.72 | 1.32 | 6.43E-05 | KCNS3(dist=285455), RDH14(dist=336309)        | intergenic   |
| 2  | 18399568  | A | G | rs386643703;rs10167646 | 1.85E-01 | 0.133 | 0.125 | 1.07 | 0.89 | -1.29 | 5.33E-06 | 0.167 | 0.121 | 1.46 | 1.25   | -1.72 | 1.32 | 6.45E-05 | KCNS3(dist=285343), RDH14(dist=336421)        | intergenic   |
| 2  | 227296851 | G | A | rs6759304              | 1.82E-05 | 0.319 | 0.376 | 0.78 | 0.68 | -0.89 | 1.37E-01 | 0.374 | 0.398 | 0.90 | 0.8    | -1.02 | 0.81 | 6.48E-05 | LOC646736(dist=252073), MIR5702(dist=226575)  | intergenic   |
| 14 | 30725099  | T | C | rs57560944             | 3.74E-01 | 0.035 | 0.042 | 0.82 | 0.59 | -1.14 | 7.80E-07 | 0.013 | 0.036 | 0.35 | 0.22   | -0.58 | 0.61 | 6.49E-05 | PRKD1(dist=328200), G2E3(dist=303230)         | intergenic   |
| 6  | 10467433  | T | A | rs594162               | 2.00E-05 | 0.412 | 0.471 | 0.79 | 0.69 | -0.89 | 1.47E-01 | 0.465 | 0.487 | 0.92 | 0.81   | -1.03 | 0.81 | 6.50E-05 | MIR5689(dist=27406), GCNT2(dist=54135)        | intergenic   |
| 1  | 184573233 | A | G | rs7517366              | 5.79E-05 | 0.266 | 0.214 | 1.33 | 1.16 | -1.54 | 7.78E-02 | 0.257 | 0.230 | 1.16 | 1.01   | -1.32 | 1.24 | 6.57E-05 | C1orf21                                       | intronic     |
| 13 | 109501412 | C | G | rs7986961              | 1.78E-05 | 0.400 | 0.335 | 0.76 | 0.67 | -0.86 | 2.44E-01 | 0.378 | 0.367 | 0.95 | 0.85   | -1.08 | 0.81 | 6.57E-05 | MYO16                                         | intronic     |
| 2  | 18399164  | C | T | rs10202316             | 1.87E-01 | 0.133 | 0.125 | 1.07 | 0.89 | -1.29 | 5.34E-06 | 0.167 | 0.121 | 1.46 | 1.25   | -1.72 | 1.32 | 6.57E-05 | KCNS3(dist=284939), RDH14(dist=336825)        | intergenic   |
| 11 | 115655209 | G | C | rs56147711             | 1.15E-01 | 0.230 | 0.220 | 1.06 | 0.91 | -1.23 | 2.81E-05 | 0.245 | 0.191 | 1.37 | 1.2    | -1.58 | 1.25 | 6.59E-05 | LINC00900(dist=24291), BUD13(dist=963677)     | intergenic   |
| 21 | 16812882  | C | T | rs1736023              | 9.87E-02 | 0.439 | 0.407 | 0.88 | 0.77 | -0.99 | 6.28E-05 | 0.458 | 0.407 | 0.81 | 0.72   | -0.92 | 0.83 | 6.59E-05 | NRIP1(dist=375756), USP25(dist=289462)        | intergenic   |
| 19 | 20417407  | C | G | rs144647567            | 1.41E-01 | 0.103 | 0.087 | 1.22 | 0.99 | -1.5  | 3.20E-05 | 0.114 | 0.089 | 1.32 | 1.09   | -1.59 | 1.44 | 6.72E-05 | ZNF486(dist=106108), MIR1270(dist=92674)      | intergenic   |
| 21 | 45861790  | T | C | rs1055540              | 3.98E-05 | 0.142 | 0.108 | 1.37 | 1.14 | -1.65 | 4.89E-01 | 0.131 | 0.133 | 0.99 | 0.83   | -1.18 | 1.72 | 6.74E-05 | TRPM2(NM_003307.c.*90>T)                      | UTR3         |
| 10 | 51463695  | G | A | rs10995905             | 1.73E-05 | 0.191 | 0.142 | 1.43 | 1.21 | -1.69 | 9.84E-01 | 0.177 | 0.186 | 0.94 | 0.81   | -1.1  | 1.76 | 6.92E-05 | TIMM23B                                       | intronic     |
| 12 | 22998968  | A | C | rs2433635              | 1.16E-05 | 0.295 | 0.228 | 0.71 | 0.61 | -0.81 | 1.55E-01 | 0.266 | 0.260 | 0.97 | 0.85   | -1.11 | 0.81 | 6.95E-05 | ETNK1(dist=155360), LOC101928441(dist=329602) | intergenic   |
| 4  | 59454403  | A | G | rs282743               | 1.84E-01 | 0.078 | 0.082 | 0.95 | 0.75 | -1.19 | 2.71E-05 | 0.061 | 0.103 | 0.56 | 0.45   | -0.72 | 0.72 | 6.97E-05 | LOC101928851(dist=1122251), NONE(dist=NONE)   | intergenic   |
| 2  | 227288314 | T | C | rs4569468              | 4.21E-05 | 0.395 | 0.457 | 0.78 | 0.68 | -0.88 | 9.39E-02 | 0.431 | 0.456 | 0.91 | 0.81   | -1.02 | 0.83 | 7.00E-05 | LOC646736(dist=243536), MIR5702(dist=235112)  | intergenic   |
| 9  | 36138829  | G | T | rs78709825             | 6.61E-07 | 0.085 | 0.055 | 1.61 | 1.27 | -2.05 | 3.99E-01 | 0.066 | 0.056 | 1.17 | 0.92   | -1.49 | 1.52 | 7.04E-05 | GLIPR2                                        | intronic     |
| 15 | 99670804  | G | A | rs114631265            | 1.58E-01 | 0.051 | 0.063 | 0.79 | 0.6  | -1.04 | 2.86E-05 | 0.036 | 0.063 | 0.55 | 0.41   | -0.75 | 0.69 | 7.06E-05 | SYNM                                          | exonic       |
| 15 | 89841719  | T | C | rs60942503             | 9.64E-02 | 0.046 | 0.038 | 1.22 | 0.9  | -1.65 | 4.85E-05 | 0.053 | 0.031 | 1.75 | 1.32   | -2.31 | 1.63 | 7.08E-05 | FANCI                                         | intronic     |
| 1  | 161975281 | T | C | rs7522269              | 6.18E-05 | 0.414 | 0.352 | 1.30 | 1.14 | -1.47 | 1.58E-01 | 0.416 | 0.422 | 0.97 | 0.86   | -1.1  | 1.43 | 7.12E-05 | OLFML2B                                       | intronic     |
| 19 | 20413360  | G | A | rs2878646              | 1.50E-01 | 0.102 | 0.085 | 1.21 | 0.98 | -1.5  | 3.05E-05 | 0.113 | 0.088 | 1.33 | 1.1    | -1.6  | 1.43 | 7.17E-05 | ZNF486(dist=102061), MIR1270(dist=96721)      | intergenic   |
| 17 | 78401588  | G | T | rs8065290              | 1.84E-01 | 0.054 | 0.043 | 0.77 | 0.58 | -1.03 | 1.12E-05 | 0.101 | 0.081 | 0.79 | 0.65   | -0.96 | 0.62 | 7.29E-05 | ENDOV                                         | intronic     |
| 15 | 99659610  | G | A | rs115956252            | 2.21E-01 | 0.053 | 0.064 | 0.82 | 0.62 | -1.07 | 1.15E-05 | 0.037 | 0.065 | 0.55 | 0.41</ |       |      |          |                                               |              |

|    |           |   |   |                        |          |       |       |      |      |       |          |       |       |      |      |       |      |          |                                                |                |
|----|-----------|---|---|------------------------|----------|-------|-------|------|------|-------|----------|-------|-------|------|------|-------|------|----------|------------------------------------------------|----------------|
| 15 | 99736024  | C | T | rs80088609             | 1.94E-01 | 0.054 | 0.066 | 0.80 | 0.61 | -1.05 | 2.09E-05 | 0.038 | 0.066 | 0.56 | 0.42 | -0.75 | 0.69 | 7.39E-05 | TTC23                                          | intronic       |
| 21 | 16817938  | G | A | rs2823286              | 2.48E-01 | 0.251 | 0.271 | 0.90 | 0.78 | -1.04 | 4.48E-06 | 0.254 | 0.308 | 0.77 | 0.67 | -0.88 | 0.80 | 7.40E-05 | NRIP1(dist=380812), USP25(dist=284406)         | intergenic     |
| 2  | 18418031  | T | C | rs10197850;rs386643706 | 8.76E-02 | 0.097 | 0.085 | 1.16 | 0.94 | -1.44 | 3.82E-05 | 0.116 | 0.082 | 1.48 | 1.22 | -1.79 | 1.39 | 7.44E-05 | KCNS3(dist=303806), RDH14(dist=317958)         | intergenic     |
| 15 | 99661825  | G | C | rs77958135             | 2.07E-01 | 0.053 | 0.064 | 0.81 | 0.62 | -1.07 | 1.45E-05 | 0.037 | 0.065 | 0.56 | 0.41 | -0.75 | 0.69 | 7.45E-05 | SYNM                                           | intronic       |
| 15 | 99661005  | C | T | rs74854067             | 2.13E-01 | 0.053 | 0.064 | 0.82 | 0.62 | -1.07 | 1.33E-05 | 0.037 | 0.065 | 0.56 | 0.41 | -0.75 | 0.69 | 7.47E-05 | SYNM                                           | intronic       |
| 21 | 16823258  | T | A | rs1736034              | 1.49E-01 | 0.465 | 0.490 | 0.90 | 0.8  | -1.02 | 1.97E-05 | 0.532 | 0.478 | 0.80 | 0.72 | -0.9  | 0.83 | 7.50E-05 | NRIP1(dist=386132), USP25(dist=279086)         | intergenic     |
| 15 | 99661912  | G | A | rs76819907             | 2.08E-01 | 0.053 | 0.064 | 0.81 | 0.62 | -1.07 | 1.46E-05 | 0.037 | 0.065 | 0.56 | 0.41 | -0.75 | 0.69 | 7.50E-05 | SYNM                                           | intronic       |
| 4  | 59434110  | G | A | rs282717               | 2.21E-01 | 0.081 | 0.084 | 1.04 | 0.83 | -1.31 | 1.86E-05 | 0.060 | 0.103 | 1.79 | 1.41 | -2.27 | 1.38 | 7.51E-05 | LOC101928851(dist=1101958), NONE(dist=NONE)    | intergenic     |
| 16 | 52945636  | G | T | rs1345340              | 3.71E-05 | 0.349 | 0.418 | 1.34 | 1.18 | -1.53 | 9.37E-02 | 0.375 | 0.386 | 1.05 | 0.93 | -1.18 | 1.22 | 7.62E-05 | CASC16(dist=304749), CHD9(dist=143309)         | intergenic     |
| 15 | 99799110  | A | G | rs115501203            | 1.33E-01 | 0.053 | 0.068 | 0.78 | 0.6  | -1.02 | 5.80E-05 | 0.040 | 0.067 | 0.58 | 0.44 | -0.78 | 0.69 | 7.62E-05 | HSP90B2P                                       | ncRNA_exonic   |
| 7  | 14330288  | T | C | rs114260678            | 2.97E-05 | 0.055 | 0.035 | 1.62 | 1.2  | -2.17 | 1.31E-01 | 0.047 | 0.038 | 1.24 | 0.93 | -1.64 | 1.70 | 7.65E-05 | DGKB                                           | intronic       |
| 8  | 39046611  | G | A | rs57494041             | 2.06E-01 | 0.093 | 0.087 | 1.07 | 0.86 | -1.33 | 1.22E-05 | 0.118 | 0.081 | 1.51 | 1.25 | -1.83 | 1.42 | 7.68E-05 | ADAM32                                         | intronic       |
| 10 | 15456812  | A | G | rs11259648             | 3.26E-01 | 0.113 | 0.101 | 0.88 | 0.72 | -1.08 | 3.74E-06 | 0.129 | 0.093 | 0.69 | 0.58 | -0.83 | 0.73 | 7.77E-05 | FAM171A1(dist=43754), ITGA8(dist=99136)        | intergenic     |
| 2  | 18395888  | A | G | rs28686940             | 1.89E-01 | 0.132 | 0.124 | 1.07 | 0.89 | -1.28 | 7.22E-06 | 0.166 | 0.121 | 1.45 | 1.23 | -1.71 | 1.33 | 7.77E-05 | KCNS3(dist=281663), RDH14(dist=340101)         | intergenic     |
| 17 | 15887010  | C | T | rs11868809             | 9.25E-02 | 0.233 | 0.197 | 1.24 | 1.07 | -1.44 | 3.68E-05 | 0.278 | 0.246 | 1.18 | 1.04 | -1.35 | 1.25 | 7.80E-05 | ZSWIM7                                         | intronic       |
| 2  | 103060300 | T | C | rs4851583              | 1.22E-01 | 0.207 | 0.225 | 0.90 | 0.77 | -1.05 | 3.03E-05 | 0.184 | 0.235 | 0.73 | 0.63 | -0.85 | 0.80 | 7.80E-05 | IL18RAP                                        | intronic       |
| 10 | 72729308  | A | G | rs827267               | 1.70E-01 | 0.032 | 0.022 | 1.49 | 1.02 | -2.18 | 2.62E-05 | 0.038 | 0.024 | 1.62 | 1.18 | -2.23 | 2.03 | 7.81E-05 | PCBD1(dist=80765), UNC5B(dist=242984)          | intergenic     |
| 13 | 109501139 | T | G | rs7983596              | 2.19E-05 | 0.398 | 0.333 | 2.06 | 1.67 | -0.86 | 2.51E-01 | 0.376 | 0.365 | 0.96 | 0.85 | -1.08 | 0.81 | 7.85E-05 | MYO16                                          | intronic       |
| 8  | 66510993  | A | G | rs72664797             | 1.52E-01 | 0.037 | 0.025 | 1.53 | 1.07 | -2.17 | 4.28E-05 | 0.053 | 0.038 | 1.43 | 1.09 | -1.87 | 1.70 | 7.96E-05 | LINC01299(dist=36092), ARMC1(dist=3698)        | intergenic     |
| 13 | 109501308 | G | A | rs7982866              | 2.25E-05 | 0.398 | 0.333 | 0.76 | 0.67 | -0.86 | 2.52E-01 | 0.376 | 0.365 | 0.96 | 0.85 | -1.08 | 0.81 | 8.01E-05 | MYO16                                          | intronic       |
| 15 | 99746519  | C | T | rs80260407             | 1.82E-01 | 0.054 | 0.068 | 0.79 | 0.61 | -1.03 | 2.91E-05 | 0.038 | 0.066 | 0.56 | 0.42 | -0.75 | 0.70 | 8.05E-05 | TTC23                                          | intronic       |
| 2  | 18420438  | G | T | rs13383629             | 1.11E-01 | 0.100 | 0.088 | 1.14 | 0.93 | -1.41 | 2.68E-05 | 0.122 | 0.085 | 1.49 | 1.24 | -1.79 | 1.38 | 8.05E-05 | KCNS3(dist=306213), RDH14(dist=315551)         | intergenic     |
| 12 | 23000966  | T | C | rs1863657              | 1.21E-05 | 0.296 | 0.228 | 0.71 | 0.61 | -0.81 | 1.64E-01 | 0.265 | 0.259 | 0.97 | 0.85 | -1.11 | 0.81 | 8.06E-05 | ETNK1(dist=157358), LOC101928441(dist=327604)  | intergenic     |
| 15 | 99657816  | C | G | rs75842179             | 2.30E-01 | 0.053 | 0.064 | 0.82 | 0.63 | -1.07 | 1.14E-05 | 0.037 | 0.064 | 0.55 | 0.41 | -0.75 | 0.69 | 8.09E-05 | SYNM                                           | intronic       |
| 20 | 13343132  | A | C | rs6109828              | 1.72E-01 | 0.097 | 0.090 | 1.09 | 0.88 | -1.34 | 1.53E-05 | 0.116 | 0.088 | 1.37 | 1.13 | -1.65 | 1.52 | 8.12E-05 | ISM1(dist=61835), TASP1(dist=26904)            | intergenic     |
| 13 | 99084496  | C | T | rs8000488              | 5.68E-05 | 0.266 | 0.208 | 1.38 | 1.19 | -1.59 | 7.26E-01 | 0.240 | 0.242 | 0.99 | 0.86 | -1.13 | 1.38 | 8.22E-05 | FARP1                                          | intronic       |
| 11 | 2699860   | A | G | rs72850276             | 1.84E-05 | 0.138 | 0.102 | 1.41 | 1.17 | -1.7  | 1.50E-01 | 0.112 | 0.095 | 1.19 | 0.99 | -1.44 | 1.35 | 8.43E-05 | KCNQ1OT1                                       | ncRNA_exonic   |
| 11 | 100730087 | A | A | rs661237               | 1.12E-01 | 0.330 | 0.311 | 0.91 | 0.8  | -1.04 | 6.09E-05 | 0.365 | 0.310 | 0.78 | 0.69 | -0.88 | 0.82 | 8.46E-05 | ARHGAP42                                       | intronic       |
| 10 | 56071780  | T | C | rs12776029             | 6.75E-06 | 0.041 | 0.021 | 2.01 | 1.41 | -2.87 | 1.64E-01 | 0.028 | 0.024 | 1.18 | 0.83 | -1.7  | 2.12 | 8.47E-05 | PCDH15                                         | intronic       |
| 2  | 103061147 | G | A | rs11694360             | 1.26E-01 | 0.207 | 0.225 | 0.90 | 0.77 | -1.05 | 3.21E-05 | 0.184 | 0.235 | 0.74 | 0.63 | -0.85 | 0.81 | 8.47E-05 | IL18RAP                                        | intronic       |
| 15 | 99655887  | G | A | rs182376189            | 2.26E-01 | 0.054 | 0.065 | 0.82 | 0.63 | -1.07 | 1.29E-05 | 0.037 | 0.064 | 0.56 | 0.41 | -0.75 | 0.69 | 8.68E-05 | SYNM                                           | intronic       |
| 15 | 99658182  | T | C | rs74462310             | 2.51E-01 | 0.055 | 0.066 | 0.83 | 0.64 | -1.08 | 1.12E-05 | 0.037 | 0.064 | 0.55 | 0.41 | -0.75 | 0.69 | 8.83E-05 | SYNM                                           | intronic       |
| 1  | 184573082 | G | A | rs10911619             | 3.09E-05 | 0.266 | 0.213 | 1.34 | 1.16 | -1.55 | 1.36E-01 | 0.253 | 0.231 | 1.13 | 0.99 | -1.3  | 1.24 | 8.85E-05 | C1orf21                                        | intronic       |
| 1  | 201918527 | T | G | rs2820304              | 1.41E-05 | 0.115 | 0.148 | 0.75 | 0.62 | -0.9  | 1.75E-01 | 0.143 | 0.167 | 0.83 | 0.7  | -0.98 | 0.77 | 9.07E-05 | LMOD1(dist=2811), TIMM17A(dist=6092)           | intergenic     |
| 11 | 120526576 | C | T | rs116190226            | 1.04E-05 | 0.069 | 0.044 | 1.63 | 1.25 | -2.12 | 2.58E-01 | 0.047 | 0.038 | 1.26 | 0.95 | -1.67 | 1.55 | 9.10E-05 | GRIK4                                          | intronic       |
| 15 | 99744710  | C | T | rs116490776            | 1.82E-01 | 0.054 | 0.068 | 0.79 | 0.61 | -1.03 | 3.46E-05 | 0.038 | 0.066 | 0.56 | 0.41 | -0.75 | 0.70 | 9.11E-05 | TTC23                                          | intronic       |
| 15 | 99744786  | T | G | rs116099345            | 1.82E-01 | 0.054 | 0.068 | 0.79 | 0.61 | -1.03 | 3.46E-05 | 0.038 | 0.066 | 0.56 | 0.41 | -0.75 | 0.70 | 9.11E-05 | TTC23                                          | intronic       |
| 11 | 120526558 | C | T | rs115858321            | 1.04E-05 | 0.069 | 0.044 | 1.63 | 1.25 | -2.12 | 2.58E-01 | 0.047 | 0.038 | 1.26 | 0.95 | -1.67 | 1.55 | 9.11E-05 | GRIK4                                          | intronic       |
| 5  | 34513623  | T | C | rs146299078            | 5.45E-05 | 0.029 | 0.059 | 0.48 | 0.34 | -0.67 | 2.13E-01 | 0.032 | 0.035 | 0.90 | 0.65 | -1.26 | 0.63 | 9.14E-05 | C1QTNF3-AMACR(dist=388990), RAI14(dist=142810) | intergenic     |
| 15 | 99746196  | G | A | rs76975778             | 1.82E-01 | 0.054 | 0.068 | 0.79 | 0.61 | -1.03 | 3.50E-05 | 0.038 | 0.066 | 0.56 | 0.41 | -0.75 | 0.70 | 9.18E-05 | TTC23                                          | intronic       |
| 5  | 150585521 | C | G | rs6884144              | 4.75E-05 | 0.111 | 0.156 | 0.68 | 0.56 | -0.82 | 1.22E-01 | 0.127 | 0.136 | 0.92 | 0.78 | -1.1  | 0.75 | 9.22E-05 | CCDC69                                         | intronic       |
| 16 | 51272249  | A | C | rs72791164             | 6.47E-05 | 0.145 | 0.099 | 1.55 | 1.29 | -1.87 | 6.85E-02 | 0.134 | 0.128 | 1.05 | 0.89 | -1.25 | 1.36 | 9.24E-05 | SALL1(dist=87066), LINC01571(dist=524181)      | intergenic     |
| 15 | 99747822  | C | T | rs148724058            | 1.83E-01 | 0.054 | 0.068 | 0.79 | 0.61 | -1.03 | 3.53E-05 | 0.038 | 0.066 | 0.56 | 0.42 | -0.75 | 0.70 | 9.26E-05 | TTC23                                          | intronic       |
| 15 | 99648572  | A | C | rs372475451;rs74659359 | 1.85E-01 | 0.055 | 0.067 | 0.81 | 0.62 | -1.06 | 2.42E-05 | 0.038 | 0.064 | 0.58 | 0.43 | -0.78 | 0.69 | 9.31E-05 | SYNM                                           | intronic       |
| 4  | 58609794  | A | G | rs111936752            | 3.46E-01 | 0.051 | 0.046 | 1.12 | 0.84 | -1.5  | 2.58E-06 | 0.061 | 0.032 | 1.92 | 1.48 | -2.5  | 1.55 | 9.33E-05 | LOC101928851(dist=277642), NONE(dist=NONE)     | intergenic     |
| 4  | 58610780  | C | T | rs145949331            | 3.47E-01 | 0.051 | 0.046 | 1.12 | 0.84 | -1.49 | 2.58E-06 | 0.061 | 0.032 | 1.92 | 1.48 | -2.5  | 1.55 | 9.38E-05 | LOC101928851(dist=278628), NONE(dist=NONE)     | intergenic     |
| 14 | 30717422  | T | G | rs60524689             | 4.50E-01 | 0.036 | 0.042 | 0.84 | 0.61 | -1.16 | 7.74E-07 | 0.013 | 0.036 | 0.36 | 0.22 | -0.58 | 0.62 | 9.39E-05 | PRKD1(dist=320523), G2E3(dist=310907)          | intergenic     |
| 4  | 189474647 | A | G | rs13132574             | 2.01E-05 | 0.077 | 0.050 | 1.57 | 1.22 | -2.02 | 2.12E-01 | 0.068 | 0.060 | 1.14 | 0.9  | -1.45 | 1.54 | 9.40E-05 | LINC01060                                      | ncRNA_intronic |
| 4  | 58611479  | C | T | rs4865276              | 3.48E-01 | 0.051 | 0.046 | 1.12 | 0.84 | -1.49 | 2.57E-06 | 0.061 | 0.032 | 1.92 | 1.48 | -2.5  | 1.55 | 9.41E-05 | LOC101928851(dist=279327), NONE(dist=NONE)     | intergenic     |
| 19 | 20398720  | C | A | rs59326174             | 3.81E-01 | 0.286 | 0.283 | 1.02 | 0.89 | -1.17 | 4.09E-06 | 0.315 | 0.255 | 1.34 | 1.18 | -1.53 | 1.23 | 9.42E-05 | ZNF486(dist=87421), MIR1270(dist=111361)       | intergenic     |
| 2  | 18447945  | G | A | rs6754763              | 3.96E-01 | 0.345 | 0.339 | 1.03 | 0.9  | -1.17 | 1.33E-06 | 0.379 | 0.305 | 1.39 | 1.23 | -1.57 | 1.21 | 9.49E-05 | KCNS3(dist=333720), RDH14(dist=288044)         | intergenic     |
| 15 | 99668489  | G | A | rs78996612             | 1.94E-01 | 0.052 | 0.063 | 0.81 | 0.62 | -1.06 | 2.70E-05 | 0.036 | 0.063 | 0.55 | 0.41 | -0.75 | 0.69 | 9.50E-05 | SYNM                                           | intronic       |
| 4  | 59451567  | G | A | rs282747               | 2.79E-01 | 0.092 | 0.096 | 0.96 | 0.77 | -1.18 | 1.60E-05 | 0.071 | 0.116 | 0.58 | 0.47 | -0.73 | 0.75 | 9.55E-05 | LOC101928851(dist=1119415), NONE(dist=NONE)    | intergenic     |
| 7  | 78985139  | G | A | rs7784630              | 2.03E-01 | 0.067 | 0.060 | 1.12 | 0.84 | -1.44 | 9.96E-06 | 0.083 | 0.054 | 1.60 | 1.28 | -1.99 | 1.49 | 9.84E-05 | MAGI2                                          | intronic       |
| 7  | 78989040  | A | G | rs77292209;rs372478728 | 1.61E-01 | 0.067 | 0.059 | 1.14 | 0.89 | -1.47 | 1.63E-05 | 0.082 | 0.053 | 1.57 | 1.26 | -1.97 | 1.49 | 9.87E-05 | MAGI2                                          | intronic       |
| 19 | 6570174   | T | C | rs345602               | 6.01E-05 | 0.279 | 0.328 | 1.23 | 1.07 | -1.41 | 7.34E-01 | 0.304 | 0.314 | 1.05 | 0.92 | -1.19 | 1.40 | 9.88E-05 | TNFSF9(dist=34235), CD70(dist=15676)           | intergenic     |
| 9  | 115700318 | C | T | rs116032311            | 1.70E-01 | 0.035 | 0.028 | 1.26 | 0.89 | -1.8  | 9.71E-06 | 0.050 | 0.031 | 1.64 | 1.24 | -2.18 | 1.79 | 9.98E-05 | SLC46A2(dist=47125), ZNF883(dist=59082)        | intergenic     |
| 9  | 115700569 | G | C | rs145296266            | 1.70E-01 | 0.035 | 0.028 | 1.26 | 0.89 |       |          |       |       |      |      |       |      |          |                                                |                |



|    |           |   |   |                        |          |       |       |      |      |       |          |       |       |      |      |       |      |          |                                             |                |
|----|-----------|---|---|------------------------|----------|-------|-------|------|------|-------|----------|-------|-------|------|------|-------|------|----------|---------------------------------------------|----------------|
| 2  | 18452130  | T | A | rs10211036             | 1.73E-01 | 0.115 | 0.104 | 1.12 | 0.92 | -1.37 | 1.62E-05 | 0.135 | 0.094 | 1.50 | 1.26 | -1.79 | 1.33 | 1.08E-04 | KCNS3(dist=337905), RDH14(dist=283859)      | intergenic     |
| 2  | 18484682  | A | C | rs10153852             | 1.44E-01 | 0.289 | 0.278 | 1.06 | 0.92 | -1.21 | 2.15E-05 | 0.306 | 0.243 | 1.38 | 1.21 | -1.57 | 1.23 | 1.09E-04 | KCNS3(dist=370457), RDH14(dist=251307)      | intergenic     |
| 8  | 50846956  | G | A | rs74546587             | 1.16E-01 | 0.067 | 0.057 | 1.18 | 0.91 | -1.52 | 6.03E-05 | 0.081 | 0.058 | 1.45 | 1.16 | -1.81 | 1.51 | 1.09E-04 | SNVTG1                                      | intronic       |
| 10 | 51467783  | T | C | rs61850065             | 2.94E-05 | 0.257 | 0.201 | 1.37 | 1.18 | -1.59 | 6.65E-01 | 0.239 | 0.252 | 0.93 | 0.81 | -1.07 | 1.57 | 1.09E-04 | ACAP7P                                      | ncRNA_intronic |
| 9  | 21342332  | G | A | rs4526448              | 1.60E-01 | 0.270 | 0.256 | 0.93 | 0.81 | -1.07 | 4.72E-05 | 0.289 | 0.238 | 0.77 | 0.68 | -0.88 | 0.81 | 1.10E-04 | KLHL9(dist=6903), IFNA6(dist=7985)          | intergenic     |
| 12 | 98533972  | G | A | rs7298668              | 2.22E-01 | 0.083 | 0.076 | 1.11 | 0.88 | -1.39 | 2.65E-05 | 0.103 | 0.070 | 1.53 | 1.25 | -1.87 | 1.44 | 1.12E-04 | MIR4303(dist=144746), SLC9A7P1(dist=313647) | intergenic     |
| 6  | 141711296 | G | A | rs149952738            | 2.77E-01 | 0.060 | 0.055 | 1.09 | 0.84 | -1.42 | 8.59E-06 | 0.078 | 0.047 | 1.70 | 1.35 | -2.14 | 1.49 | 1.12E-04 | MIR4465(dist=706276), NMBR(dist=685449)     | intergenic     |
| 6  | 141707890 | C | G | rs150824548            | 2.78E-01 | 0.060 | 0.056 | 1.09 | 0.84 | -1.42 | 8.73E-06 | 0.078 | 0.047 | 1.70 | 1.35 | -2.14 | 1.49 | 1.14E-04 | MIR4465(dist=702870), NMBR(dist=688855)     | intergenic     |
| 6  | 141706496 | A | C | rs116839492            | 2.71E-01 | 0.060 | 0.055 | 1.09 | 0.84 | -1.42 | 9.89E-06 | 0.077 | 0.047 | 1.70 | 1.35 | -2.14 | 1.49 | 1.16E-04 | MIR4465(dist=701476), NMBR(dist=690249)     | intergenic     |
| 17 | 30051595  | C | T | rs373060172;rs770513   | 3.02E-05 | 0.057 | 0.029 | 0.49 | 0.36 | -0.66 | 1.20E-01 | 0.053 | 0.050 | 0.94 | 0.73 | -1.23 | 0.60 | 1.17E-04 | MIR365B(dist=149055), COPRS(dist=127289)    | intergenic     |
| 2  | 224780745 | C | G | rs73994435             | 3.97E-08 | 0.056 | 0.026 | 2.21 | 1.61 | -3.02 | 7.37E-01 | 0.033 | 0.033 | 1.01 | 0.73 | -1.4  | 1.70 | 1.17E-04 | WDFY1                                       | intronic       |
| 2  | 224695905 | T | G | rs60563766             | 3.66E-05 | 0.109 | 0.072 | 1.56 | 1.26 | -1.93 | 1.38E-01 | 0.102 | 0.088 | 1.18 | 0.97 | -1.44 | 1.39 | 1.18E-04 | AP1S3                                       | intronic       |
| 16 | 84543763  | G | A | rs7185740              | 1.97E-01 | 0.128 | 0.125 | 1.03 | 0.85 | -1.24 | 4.98E-05 | 0.129 | 0.185 | 0.65 | 0.55 | -0.77 | 0.77 | 1.24E-04 | TLDC1(dist=5475), COTL1(dist=554441)        | intergenic     |
| 1  | 1037313   | A | G | rs11260593             | 2.35E-01 | 0.460 | 0.458 | 1.01 | 0.89 | -1.14 | 1.64E-05 | 0.489 | 0.415 | 1.35 | 1.2  | -1.52 | 1.20 | 1.25E-04 | C1orf159                                    | intronic       |
| 4  | 58622334  | A | G | rs147270744            | 3.60E-01 | 0.048 | 0.043 | 1.13 | 0.84 | -1.52 | 4.76E-06 | 0.059 | 0.033 | 1.86 | 1.43 | -2.43 | 1.57 | 1.26E-04 | LOC101928851(dist=290182), NONE(dist=NONE)  | intergenic     |
| 14 | 62731831  | G | C | rs11621514             | 4.93E-01 | 0.394 | 0.393 | 1.00 | 0.88 | -1.13 | 3.15E-06 | 0.423 | 0.348 | 0.73 | 0.65 | -0.82 | 0.84 | 1.28E-04 | LINC00644(dist=125140), KCNH5(dist=441460)  | intergenic     |
| 2  | 18429834  | C | G | rs28565330             | 1.63E-01 | 0.162 | 0.153 | 1.07 | 0.91 | -1.27 | 3.39E-05 | 0.186 | 0.138 | 1.43 | 1.22 | -1.66 | 1.28 | 1.29E-04 | KCNS3(dist=315609), RDH14(dist=306155)      | intergenic     |
| 4  | 59475638  | A | G | rs2662836              | 2.55E-01 | 0.099 | 0.103 | 0.95 | 0.77 | -1.17 | 3.42E-05 | 0.074 | 0.118 | 0.60 | 0.49 | -0.75 | 0.75 | 1.29E-04 | LOC101928851(dist=1143486), NONE(dist=NONE) | intergenic     |
| 19 | 50304439  | T | C | rs10421754             | 5.96E-01 | 0.403 | 0.393 | 1.05 | 0.92 | -1.19 | 3.82E-06 | 0.436 | 0.376 | 1.28 | 1.14 | -1.44 | 1.21 | 1.30E-04 | AP2A1                                       | intronic       |
| 2  | 18430432  | G | A | rs10181532             | 1.61E-01 | 0.162 | 0.153 | 1.07 | 0.91 | -1.27 | 2.81E-05 | 0.189 | 0.142 | 1.41 | 1.21 | -1.64 | 1.28 | 1.32E-04 | KCNS3(dist=316207), RDH14(dist=305557)      | intergenic     |
| 2  | 224788923 | T | C | rs73994441             | 5.43E-08 | 0.056 | 0.027 | 2.17 | 1.59 | -2.97 | 7.41E-01 | 0.033 | 0.033 | 1.01 | 0.73 | -1.4  | 1.70 | 1.34E-04 | WDFY1                                       | intronic       |
| 2  | 224791466 | C | T | rs76170429             | 5.46E-08 | 0.056 | 0.027 | 2.17 | 1.59 | -2.97 | 7.41E-01 | 0.033 | 0.033 | 1.01 | 0.73 | -1.4  | 1.70 | 1.34E-04 | WDFY1                                       | intronic       |
| 2  | 224795310 | G | A | rs61607350             | 5.52E-08 | 0.056 | 0.027 | 2.17 | 1.59 | -2.96 | 7.41E-01 | 0.033 | 0.033 | 1.01 | 0.73 | -1.4  | 1.69 | 1.34E-04 | WDFY1                                       | intronic       |
| 17 | 25695084  | G | A | rs1676581              | 2.08E-01 | 0.051 | 0.041 | 1.27 | 0.95 | -1.7  | 2.25E-05 | 0.085 | 0.061 | 1.43 | 1.15 | -1.78 | 1.54 | 1.35E-04 | WSB1(dist=54439), TBC1D3P5(dist=49947)      | intergenic     |
| 14 | 62756802  | T | A | rs6573430              | 2.11E-01 | 0.262 | 0.252 | 1.06 | 0.92 | -1.22 | 2.96E-05 | 0.280 | 0.223 | 1.35 | 1.18 | -1.54 | 1.23 | 1.35E-04 | LINC00644(dist=150111), KCNH5(dist=416489)  | intergenic     |
| 2  | 18401496  | A | G | rs10174281             | 1.16E-01 | 0.100 | 0.090 | 1.13 | 0.92 | -1.4  | 5.59E-05 | 0.119 | 0.084 | 1.47 | 1.22 | -1.77 | 1.37 | 1.36E-04 | KCNS3(dist=287271), RDH14(dist=334493)      | intergenic     |
| 2  | 103062116 | A | G | rs7597017              | 1.44E-01 | 0.210 | 0.228 | 0.90 | 0.78 | -1.05 | 4.90E-05 | 0.188 | 0.238 | 0.74 | 0.64 | -0.86 | 0.81 | 1.36E-04 | IL18RAP                                     | intronic       |
| 2  | 103062754 | T | A | rs4851585              | 1.52E-01 | 0.220 | 0.236 | 0.91 | 0.79 | -1.06 | 4.70E-05 | 0.195 | 0.245 | 0.75 | 0.65 | -0.86 | 0.81 | 1.38E-04 | IL18RAP                                     | intronic       |
| 9  | 36138332  | C | G | rs7037771              | 2.65E-06 | 0.081 | 0.050 | 1.69 | 1.32 | -2.16 | 4.36E-01 | 0.065 | 0.056 | 1.17 | 0.92 | -1.48 | 1.48 | 1.39E-04 | GLIPR2                                      | intronic       |
| 1  | 1040824   | T | C | rs6656379              | 2.40E-01 | 0.477 | 0.476 | 1.01 | 0.89 | -1.14 | 1.82E-05 | 0.500 | 0.424 | 1.36 | 1.21 | -1.53 | 1.19 | 1.40E-04 | C1orf159                                    | intronic       |
| 12 | 32955330  | G | A | rs74072938             | 4.03E-05 | 0.149 | 0.200 | 1.70 | 0.59 | -0.82 | 1.44E-01 | 0.169 | 0.177 | 0.94 | 0.81 | -1.1  | 0.80 | 1.41E-04 | PKP2                                        | intronic       |
| 12 | 98531468  | G | C | rs79589706             | 2.92E-01 | 0.080 | 0.073 | 1.10 | 0.87 | -1.39 | 1.26E-05 | 0.104 | 0.069 | 1.55 | 1.27 | -1.89 | 1.42 | 1.41E-04 | MIR4303(dist=142242), SLC9A7P1(dist=316151) | intergenic     |
| 17 | 25686369  | A | G | rs322200               | 1.77E-01 | 0.043 | 0.033 | 1.34 | 0.97 | -1.84 | 5.28E-05 | 0.078 | 0.056 | 1.42 | 1.14 | -1.78 | 1.58 | 1.45E-04 | WSB1(dist=45724), TBC1D3P5(dist=58662)      | intergenic     |
| 4  | 59452393  | A | G | rs282745               | 3.56E-01 | 0.095 | 0.098 | 0.97 | 0.79 | -1.2  | 1.60E-05 | 0.071 | 0.116 | 0.58 | 0.47 | -0.73 | 0.75 | 1.45E-04 | LOC101928851(dist=1120241), NONE(dist=NONE) | intergenic     |
| 12 | 98556393  | T | C | rs12316958             | 4.65E-01 | 0.098 | 0.095 | 1.03 | 0.84 | -1.27 | 4.75E-06 | 0.134 | 0.093 | 1.51 | 1.27 | -1.81 | 1.35 | 1.47E-04 | MIR4303(dist=167167), SLC9A7P1(dist=291226) | intergenic     |
| 6  | 31745518  | A | G | rs707927               | 1.76E-01 | 0.150 | 0.140 | 1.08 | 0.9  | -1.28 | 4.83E-05 | 0.179 | 0.129 | 1.47 | 1.26 | -1.72 | 1.28 | 1.48E-04 | VARS                                        | intronic       |
| 2  | 18459548  | C | G | rs9808223              | 1.42E-01 | 0.119 | 0.107 | 1.12 | 0.93 | -1.36 | 4.20E-05 | 0.137 | 0.098 | 1.47 | 1.23 | -1.75 | 1.32 | 1.50E-04 | KCNS3(dist=345323), RDH14(dist=276441)      | intergenic     |
| 15 | 99661156  | C | T | rs77244447             | 2.86E-01 | 0.055 | 0.064 | 0.84 | 0.64 | -1.1  | 1.84E-05 | 0.038 | 0.065 | 0.57 | 0.42 | -0.76 | 0.70 | 1.54E-04 | SYNM                                        | intronic       |
| 4  | 76060129  | A | G | rs10034825             | 6.04E-05 | 0.337 | 0.285 | 1.28 | 1.12 | -1.46 | 1.63E-01 | 0.312 | 0.284 | 1.14 | 1    | -1.3  | 1.21 | 1.54E-04 | PARM1(dist=84804), LOC441025(dist=219157)   | intergenic     |
| 4  | 76057984  | A | G | rs10028446             | 2.94E-05 | 0.319 | 0.265 | 1.30 | 1.13 | -1.48 | 2.12E-01 | 0.297 | 0.273 | 1.13 | 0.99 | -1.28 | 1.21 | 1.55E-04 | PARM1(dist=82659), LOC441025(dist=221302)   | intergenic     |
| 15 | 66227360  | A | G | rs79164400             | 2.11E-01 | 0.079 | 0.064 | 1.25 | 0.99 | -1.59 | 5.54E-05 | 0.096 | 0.072 | 1.37 | 1.12 | -1.68 | 1.41 | 1.55E-04 | MEGF11                                      | intronic       |
| 1  | 237838717 | C | T | rs78222358             | 9.96E-02 | 0.090 | 0.082 | 1.11 | 0.89 | -1.39 | 2.89E-05 | 0.085 | 0.059 | 1.47 | 1.19 | -1.83 | 1.47 | 1.57E-04 | RYR2                                        | intronic       |
| 11 | 5436004   | C | G | rs7119357              | 2.31E-01 | 0.419 | 0.415 | 0.98 | 0.87 | -1.12 | 2.60E-05 | 0.475 | 0.411 | 0.77 | 0.68 | -0.87 | 0.83 | 1.58E-04 | OR51B5                                      | intronic       |
| 7  | 14281800  | T | A | rs116116450            | 2.42E-01 | 0.087 | 0.079 | 1.11 | 0.89 | -1.38 | 1.13E-05 | 0.096 | 0.061 | 1.63 | 1.33 | -2.01 | 1.40 | 1.60E-04 | DGKB                                        | intronic       |
| 4  | 59487504  | C | G | rs282697               | 2.68E-01 | 0.105 | 0.108 | 0.96 | 0.79 | -1.18 | 3.83E-05 | 0.079 | 0.122 | 0.62 | 0.5  | -0.76 | 0.75 | 1.60E-04 | LOC101928851(dist=1155352), NONE(dist=NONE) | intergenic     |
| 19 | 50301844  | T | G | rs7248071              | 6.05E-01 | 0.394 | 0.384 | 1.05 | 0.92 | -1.19 | 2.63E-06 | 0.424 | 0.362 | 1.30 | 1.15 | -1.46 | 1.19 | 1.62E-04 | AP2A1                                       | intronic       |
| 11 | 102677830 | T | A | rs115066265            | 4.17E-01 | 0.029 | 0.026 | 1.12 | 0.77 | -1.63 | 8.26E-06 | 0.046 | 0.023 | 2.04 | 1.5  | -2.76 | 1.72 | 1.65E-04 | WTAPP1                                      | ncRNA_intronic |
| 2  | 234695224 | T | G | rs10929304             | 2.52E-05 | 0.393 | 0.335 | 0.78 | 0.69 | -0.89 | 2.04E-01 | 0.357 | 0.332 | 0.89 | 0.79 | -1.01 | 0.83 | 1.66E-04 | MROH2A                                      | intronic       |
| 1  | 1047374   | T | A | rs12743678;rs386627440 | 2.60E-01 | 0.474 | 0.474 | 1.00 | 0.88 | -1.13 | 1.75E-05 | 0.493 | 0.418 | 1.36 | 1.21 | -1.52 | 1.19 | 1.68E-04 | C1orf159                                    | intronic       |
| 6  | 32207181  | G | A | rs3130304              | 6.37E-05 | 0.203 | 0.159 | 1.34 | 1.15 | -1.58 | 1.51E-01 | 0.167 | 0.157 | 1.08 | 0.92 | -1.26 | 1.27 | 1.70E-04 | NOTCH4(dist=15337), C6orf10(dist=53294)     | intergenic     |
| 11 | 122784803 | A | G | rs7118375              | 1.81E-05 | 0.186 | 0.236 | 0.74 | 0.64 | -0.87 | 2.87E-01 | 0.198 | 0.201 | 0.98 | 0.85 | -1.14 | 0.77 | 1.70E-04 | C11orf63                                    | intronic       |
| 15 | 89857804  | T | C | rs16943013             | 3.06E-01 | 0.063 | 0.060 | 1.05 | 0.81 | -1.36 | 1.88E-05 | 0.077 | 0.046 | 1.71 | 1.35 | -2.15 | 1.46 | 1.70E-04 | FANCI                                       | intronic       |
| 19 | 20404935  | G | T | rs4309516              | 3.38E-01 | 0.284 | 0.280 | 1.02 | 0.89 | -1.17 | 1.41E-05 | 0.305 | 0.247 | 1.34 | 1.18 | -1.52 | 1.22 | 1.71E-04 | ZNF486(dist=93636), MIR1270(dist=105146)    | intergenic     |
| 17 | 78384745  | A | C | rs9900214              | 2.24E-01 | 0.057 | 0.045 | 0.77 | 0.59 | -1.02 | 2.56E-05 | 0.109 | 0.089 | 0.80 | 0.66 | -0.97 | 0.66 | 1.71E-04 | LOC100294362                                | ncRNA_intronic |
| 7  | 49795069  | A | G | rs149533983            | 1.47E-01 | 0.046 | 0.040 | 1.16 | 0.86 | -1.57 | 2.00E-05 | 0.053 | 0.032 | 1.71 | 1.3  | -2.25 | 1.62 | 1.72E-04 | CDC14C(dist=828020), VWC2(dist=18188)       | intergenic     |
| 2  | 18451855  | A | T | rs1597823;rs200592303  | 4.35E-01 | 0.335 | 0.328 | 1.03 | 0.9  | -1.17 | 2.80E-06 | 0.369 | 0.297 | 1.39 | 1.23 | -1.57 | 1.20 | 1.75E-04 | KCNS3(dist=337630), RDH14(dist=284134)      | intergenic     |
| 14 | 62731060  | A | G | rs386778159;rs1160225  | 5.60E-01 | 0.394 | 0.395 | 1.00 | 0.88 | -1.14 | 3.49E-06 | 0.423 | 0.348 | 0.73 | 0.65 | -0.82 | 0.84 |          |                                             |                |

|    |           |   |   |             |          |       |       |      |             |          |       |       |      |             |      |          |                                                  |                |
|----|-----------|---|---|-------------|----------|-------|-------|------|-------------|----------|-------|-------|------|-------------|------|----------|--------------------------------------------------|----------------|
| 20 | 61998443  | T | C | rs6062905   | 2.13E-01 | 0.327 | 0.356 | 1.14 | 1 - 1.3     | 4.96E-05 | 0.275 | 0.313 | 1.20 | 1.06 - 1.37 | 1.21 | 1.80E-04 | LOC100130587                                     | ncRNA_exonic   |
| 4  | 58636091  | A | G | rs147377103 | 4.21E-01 | 0.047 | 0.043 | 1.09 | 0.81 - 1.47 | 5.76E-06 | 0.058 | 0.030 | 1.96 | 1.5 - 2.57  | 1.52 | 1.81E-04 | LOC101928851(dist=303939), NONE(dist=NONE)       | intergenic     |
| 15 | 99640809  | G | A | rs114783288 | 2.29E-01 | 0.058 | 0.069 | 0.83 | 0.64 - 1.08 | 3.97E-05 | 0.040 | 0.065 | 0.60 | 0.45 - 0.8  | 0.69 | 1.81E-04 | LUNAR1(dist=66534), SYNM(dist=4477)              | intergenic     |
| 1  | 1049950   | A | G | rs12726255  | 2.73E-01 | 0.476 | 0.477 | 1.00 | 0.88 - 1.13 | 1.72E-05 | 0.490 | 0.415 | 1.35 | 1.2 - 1.52  | 1.19 | 1.84E-04 | C1orf159                                         | intronic       |
| 3  | 64001925  | C | T | rs9879045   | 2.96E-01 | 0.495 | 0.494 | 1.00 | 0.89 - 1.14 | 2.89E-05 | 0.528 | 0.462 | 1.30 | 1.16 - 1.46 | 1.19 | 1.85E-04 | PSMD6                                            | intronic       |
| 7  | 20533001  | G | T | rs67630182  | 1.06E-05 | 0.192 | 0.255 | 0.69 | 0.6 - 0.81  | 3.59E-01 | 0.227 | 0.233 | 0.97 | 0.84 - 1.11 | 0.81 | 1.86E-04 | ITGB8(dist=77619), ABCB5(dist=122244)            | intergenic     |
| 7  | 46076308  | A | C | rs812570    | 2.40E-01 | 0.422 | 0.397 | 0.90 | 0.79 - 1.02 | 2.81E-05 | 0.497 | 0.445 | 0.81 | 0.72 - 0.91 | 0.84 | 1.86E-04 | IGFBP3(dist=115437), TNS3(dist=1238444)          | intergenic     |
| 4  | 58637102  | G | A | rs187655745 | 4.30E-01 | 0.046 | 0.043 | 1.09 | 0.81 - 1.47 | 5.72E-06 | 0.058 | 0.030 | 1.97 | 1.5 - 2.58  | 1.52 | 1.86E-04 | LOC101928851(dist=304950), NONE(dist=NONE)       | intergenic     |
| 14 | 62730813  | T | A | rs10873147  | 5.49E-01 | 0.397 | 0.398 | 1.00 | 0.88 - 1.14 | 4.28E-06 | 0.425 | 0.350 | 0.73 | 0.65 - 0.82 | 0.84 | 1.88E-04 | LINC00644(dist=124122), KCNH5(dist=442478)       | intergenic     |
| 8  | 38952925  | T | C | rs55985346  | 5.52E-01 | 0.089 | 0.090 | 0.99 | 0.79 - 1.22 | 2.82E-06 | 0.117 | 0.075 | 1.63 | 1.35 - 1.97 | 1.37 | 1.88E-04 | ADAM9                                            | intronic       |
| 19 | 20397555  | A | C | rs11085307  | 4.03E-01 | 0.282 | 0.279 | 1.01 | 0.88 - 1.16 | 9.97E-06 | 0.311 | 0.253 | 1.33 | 1.17 - 1.51 | 1.22 | 1.89E-04 | ZNF486(dist=86256), MIR1270(dist=112526)         | intergenic     |
| 3  | 57032400  | G | A | rs9311636   | 3.10E-05 | 0.040 | 0.022 | 1.85 | 1.3 - 2.63  | 2.28E-01 | 0.029 | 0.022 | 1.30 | 0.91 - 1.87 | 1.75 | 1.91E-04 | ARHGEF3                                          | intronic       |
| 14 | 30731259  | A | G | rs74043212  | 4.00E-01 | 0.043 | 0.049 | 0.88 | 0.65 - 1.18 | 6.05E-06 | 0.021 | 0.046 | 0.45 | 0.31 - 0.66 | 0.67 | 1.92E-04 | PRKD1(dist=334360), G2E3(dist=297070)            | intergenic     |
| 1  | 67747023  | G | C | rs12141431  | 2.02E-01 | 0.087 | 0.065 | 1.36 | 1.08 - 1.72 | 4.93E-05 | 0.110 | 0.091 | 1.23 | 1.02 - 1.49 | 1.41 | 1.93E-04 | IL23R(dist=21373), IL12RB2(dist=26024)           | intergenic     |
| 19 | 20401367  | T | A | rs11668982  | 3.85E-01 | 0.280 | 0.278 | 1.01 | 0.88 - 1.16 | 1.19E-05 | 0.306 | 0.248 | 1.34 | 1.18 - 1.52 | 1.22 | 1.93E-04 | ZNF486(dist=90068), MIR1270(dist=108714)         | intergenic     |
| 14 | 62732065  | C | T | rs12587137  | 5.72E-01 | 0.394 | 0.395 | 1.00 | 0.88 - 1.14 | 3.57E-06 | 0.422 | 0.347 | 0.73 | 0.65 - 0.82 | 0.84 | 1.94E-04 | LINC00644(dist=125374), KCNH5(dist=441226)       | intergenic     |
| 8  | 50360812  | C | A | rs142570366 | 1.40E-05 | 0.057 | 0.035 | 1.66 | 1.24 - 2.23 | 2.73E-01 | 0.046 | 0.038 | 1.23 | 0.93 - 1.63 | 1.60 | 1.95E-04 | C8orf22(dist=372170), SNTG1(dist=461537)         | intergenic     |
| 19 | 20398680  | T | C | rs61627828  | 4.04E-01 | 0.283 | 0.280 | 1.01 | 0.88 - 1.16 | 1.07E-05 | 0.311 | 0.253 | 1.33 | 1.17 - 1.51 | 1.22 | 1.97E-04 | ZNF486(dist=87381), MIR1270(dist=111401)         | intergenic     |
| 2  | 18399755  | A | T | rs13385815  | 1.72E-01 | 0.073 | 0.065 | 1.13 | 0.88 - 1.44 | 2.11E-05 | 0.080 | 0.052 | 1.60 | 1.28 - 2.01 | 1.47 | 1.98E-04 | KCNS3(dist=285530), RDH14(dist=336234)           | intergenic     |
| 19 | 20397253  | C | T | rs74183971  | 4.18E-01 | 0.282 | 0.280 | 1.01 | 0.88 - 1.16 | 9.79E-06 | 0.312 | 0.254 | 1.33 | 1.17 - 1.51 | 1.22 | 1.98E-04 | ZNF486(dist=85954), MIR1270(dist=112828)         | intergenic     |
| 4  | 58641087  | C | T | rs1858149   | 4.30E-01 | 0.046 | 0.042 | 1.09 | 0.81 - 1.47 | 4.13E-06 | 0.059 | 0.033 | 1.87 | 1.43 - 2.44 | 1.53 | 2.00E-04 | LOC101928851(dist=308935), NONE(dist=NONE)       | intergenic     |
| 16 | 58989225  | A | G | rs73564105  | 4.45E-01 | 0.050 | 0.046 | 1.09 | 0.81 - 1.45 | 6.28E-06 | 0.074 | 0.046 | 1.66 | 1.31 - 2.09 | 1.52 | 2.02E-04 | GOT2(dist=220964), APOOP5(dist=798820)           | intergenic     |
| 2  | 205081598 | A | G | rs10932052  | 1.74E-01 | 0.304 | 0.283 | 1.10 | 0.96 - 1.26 | 3.70E-05 | 0.350 | 0.305 | 1.23 | 1.08 - 1.39 | 1.22 | 2.04E-04 | ICOS(dist=255300), PAR3B(dist=328918)            | intergenic     |
| 8  | 57779558  | A | G | rs16921235  | 2.68E-01 | 0.287 | 0.278 | 1.04 | 0.91 - 1.2  | 3.26E-05 | 0.317 | 0.258 | 1.34 | 1.18 - 1.52 | 1.21 | 2.06E-04 | LINC00968(dist=307176), IMPAD1(dist=90930)       | intergenic     |
| 7  | 49795152  | T | C | rs114595294 | 1.85E-01 | 0.046 | 0.042 | 1.12 | 0.83 - 1.5  | 2.20E-05 | 0.053 | 0.032 | 1.70 | 1.29 - 2.24 | 1.64 | 2.06E-04 | CDC14C(dist=828103), VWC2(dist=18105)            | intergenic     |
| 8  | 57783987  | T | A | rs2873554   | 2.72E-01 | 0.288 | 0.279 | 1.04 | 0.91 - 1.2  | 3.16E-05 | 0.318 | 0.258 | 1.34 | 1.18 - 1.52 | 1.21 | 2.06E-04 | LINC00968(dist=311605), IMPAD1(dist=86501)       | intergenic     |
| 2  | 241405483 | G | A | rs61737165  | 2.71E-01 | 0.027 | 0.024 | 1.16 | 0.79 - 1.72 | 3.02E-05 | 0.042 | 0.026 | 1.68 | 1.24 - 2.29 | 1.88 | 2.07E-04 | GPC1                                             | exonic         |
| 1  | 159084368 | C | T | rs4233471   | 2.41E-01 | 0.444 | 0.410 | 1.15 | 1.02 - 1.3  | 2.35E-05 | 0.486 | 0.450 | 1.15 | 1.03 - 1.3  | 1.20 | 2.08E-04 | AIM2(dist=37721), CADM3(dist=57009)              | intergenic     |
| 14 | 63978361  | A | T | rs8009130   | 1.41E-05 | 0.110 | 0.072 | 1.59 | 1.29 - 1.97 | 2.97E-01 | 0.096 | 0.091 | 1.07 | 0.87 - 1.3  | 1.38 | 2.10E-04 | PPP2R5E                                          | intronic       |
| 7  | 158015560 | A | G | rs6944416   | 3.77E-01 | 0.288 | 0.284 | 0.98 | 0.86 - 1.13 | 1.33E-05 | 0.270 | 0.336 | 1.37 | 1.2 - 1.56  | 1.21 | 2.10E-04 | PTRN2                                            | intronic       |
| 8  | 66488718  | T | C | rs67020592  | 3.42E-01 | 0.077 | 0.068 | 1.15 | 0.91 - 1.46 | 1.95E-05 | 0.100 | 0.072 | 1.44 | 1.18 - 1.77 | 1.38 | 2.12E-04 | LINC01299(dist=13817), ARMC1(dist=25973)         | intergenic     |
| 16 | 59002638  | G | T | rs16960701  | 6.05E-01 | 0.052 | 0.050 | 1.04 | 0.79 - 1.38 | 1.01E-06 | 0.077 | 0.049 | 1.62 | 1.29 - 2.04 | 1.54 | 2.12E-04 | GOT2(dist=234377), APOOP5(dist=785407)           | intergenic     |
| 1  | 247110336 | G | A | rs113486416 | 5.07E-05 | 0.192 | 0.154 | 1.30 | 1.11 - 1.53 | 2.68E-01 | 0.153 | 0.133 | 1.17 | 0.99 - 1.38 | 1.27 | 2.13E-04 | ZNF670-ZNF695                                    | ncRNA_intronic |
| 12 | 98534766  | C | A | rs79555181  | 2.68E-01 | 0.081 | 0.073 | 1.11 | 0.88 - 1.4  | 2.66E-05 | 0.103 | 0.070 | 1.53 | 1.25 - 1.87 | 1.40 | 2.13E-04 | MIR4303(dist=145540), SLC9A7P1(dist=312853)      | intergenic     |
| 8  | 66487345  | G | A | rs77019597  | 3.42E-01 | 0.077 | 0.068 | 1.15 | 0.91 - 1.46 | 1.98E-05 | 0.100 | 0.072 | 1.44 | 1.18 - 1.77 | 1.38 | 2.14E-04 | LINC01299(dist=12444), ARMC1(dist=27346)         | intergenic     |
| 8  | 66487080  | G | A | rs67578031  | 3.42E-01 | 0.077 | 0.068 | 1.15 | 0.91 - 1.46 | 1.99E-05 | 0.100 | 0.072 | 1.44 | 1.18 - 1.77 | 1.38 | 2.14E-04 | LINC01299(dist=12179), ARMC1(dist=27611)         | intergenic     |
| 7  | 79025250  | C | T | rs76530656  | 3.20E-01 | 0.038 | 0.033 | 1.16 | 0.83 - 1.61 | 1.08E-05 | 0.053 | 0.032 | 1.71 | 1.3 - 2.25  | 1.67 | 2.16E-04 | MAGI2                                            | intronic       |
| 21 | 16817051  | A | G | rs1297265   | 1.83E-01 | 0.435 | 0.458 | 0.91 | 0.81 - 1.03 | 5.96E-05 | 0.438 | 0.489 | 0.81 | 0.72 - 0.91 | 0.84 | 2.16E-04 | NRIP1(dist=379925), USP25(dist=285293)           | intergenic     |
| 5  | 92135678  | A | C | rs26720     | 3.33E-05 | 0.416 | 0.484 | 1.32 | 1.16 - 1.49 | 2.92E-01 | 0.427 | 0.444 | 1.07 | 0.95 - 1.2  | 1.19 | 2.17E-04 | ARRDC3-AS1(dist=1419146), NR2F1-AS1(dist=609384) | intergenic     |
| 12 | 98555234  | G | T | rs12307886  | 2.84E-01 | 0.091 | 0.086 | 1.07 | 0.86 - 1.32 | 3.36E-05 | 0.116 | 0.079 | 1.53 | 1.27 - 1.85 | 1.35 | 2.20E-04 | MIR4303(dist=166008), SLC9A7P1(dist=292385)      | intergenic     |
| 7  | 14280706  | T | C | rs56697957  | 2.21E-01 | 0.086 | 0.079 | 1.10 | 0.88 - 1.37 | 3.12E-05 | 0.091 | 0.059 | 1.59 | 1.29 - 1.97 | 1.42 | 2.23E-04 | DGKB                                             | intronic       |
| 8  | 66530244  | G | A | rs144483374 | 3.98E-01 | 0.077 | 0.068 | 1.14 | 0.9 - 1.45  | 1.30E-05 | 0.101 | 0.072 | 1.45 | 1.19 - 1.78 | 1.38 | 2.25E-04 | ARMC1                                            | intronic       |
| 8  | 66536135  | C | T | rs147230370 | 3.98E-01 | 0.077 | 0.068 | 1.14 | 0.9 - 1.45  | 1.30E-05 | 0.101 | 0.072 | 1.45 | 1.19 - 1.78 | 1.38 | 2.25E-04 | ARMC1                                            | intronic       |
| 8  | 66538975  | G | A | rs66850618  | 3.98E-01 | 0.077 | 0.068 | 1.14 | 0.9 - 1.45  | 1.30E-05 | 0.101 | 0.072 | 1.45 | 1.19 - 1.78 | 1.38 | 2.25E-04 | ARMC1                                            | intronic       |
| 8  | 66545781  | C | G | rs68077070  | 3.98E-01 | 0.077 | 0.068 | 1.14 | 0.9 - 1.45  | 1.30E-05 | 0.101 | 0.072 | 1.45 | 1.19 - 1.78 | 1.38 | 2.25E-04 | ARMC1                                            | intronic       |
| 1  | 33626154  | C | T | rs10798929  | 3.59E-01 | 0.092 | 0.074 | 1.27 | 1.02 - 1.58 | 5.05E-06 | 0.131 | 0.115 | 1.16 | 0.97 - 1.38 | 1.43 | 2.25E-04 | TRIM62                                           | intronic       |
| 1  | 1056715   | C | T | rs7538862   | 3.17E-01 | 0.475 | 0.477 | 0.99 | 0.88 - 1.12 | 1.37E-05 | 0.478 | 0.403 | 1.35 | 1.2 - 1.52  | 1.19 | 2.26E-04 | C1orf159(dist=4979), LINC01342(dist=15682)       | intergenic     |
| 3  | 3350835   | A | T | rs116556690 | 1.17E-05 | 0.049 | 0.028 | 1.79 | 1.3 - 2.46  | 6.77E-01 | 0.029 | 0.026 | 1.11 | 0.78 - 1.58 | 1.75 | 2.29E-04 | CRBN(dist=129434), LRRN1(dist=490286)            | intergenic     |
| 12 | 1625663   | T | C | rs12817716  | 9.68E-01 | 0.060 | 0.054 | 0.90 | 0.69 - 1.17 | 3.25E-07 | 0.031 | 0.069 | 2.31 | 1.68 - 3.17 | 1.47 | 2.31E-04 | LINC00942(dist=12073), FBXL14(dist=49496)        | intergenic     |
| 2  | 224815458 | T | C | rs60476567  | 6.37E-07 | 0.052 | 0.026 | 2.11 | 1.54 - 2.91 | 8.69E-01 | 0.029 | 0.029 | 1.02 | 0.72 - 1.45 | 1.69 | 2.32E-04 | WDFY1(dist=5354), MRPL44(dist=6663)              | intergenic     |
| 2  | 236506403 | T | G | rs35898683  | 1.36E-06 | 0.280 | 0.238 | 1.24 | 1.08 - 1.43 | 7.97E-01 | 0.212 | 0.202 | 1.06 | 0.92 - 1.22 | 1.28 | 2.33E-04 | AGAP1                                            | intronic       |
| 2  | 224813548 | T | G | rs73992129  | 6.54E-07 | 0.052 | 0.026 | 2.11 | 1.53 - 2.91 | 8.70E-01 | 0.029 | 0.029 | 1.02 | 0.72 - 1.45 | 1.69 | 2.36E-04 | WDFY1(dist=3444), MRPL44(dist=8573)              | intergenic     |
| 8  | 66555442  | C | G | rs66851666  | 4.00E-01 | 0.077 | 0.068 | 1.14 | 0.9 - 1.44  | 1.43E-05 | 0.101 | 0.072 | 1.45 | 1.19 - 1.77 | 1.38 | 2.36E-04 | ARMC1(dist=8990), MTFR1(dist=1446)               | intergenic     |
| 14 | 62726515  | G | A | rs1567953   | 5.96E-01 | 0.395 | 0.397 | 1.01 | 0.89 - 1.14 | 4.72E-06 | 0.428 | 0.353 | 0.73 | 0.65 - 0.82 | 0.84 | 2.36E-04 | LINC00644(dist=119824), KCNH5(dist=446776)       | intergenic     |
| 14 | 85459876  | A | G | rs114508225 | 1.06E-05 | 0.054 | 0.035 | 1.59 | 1.18 - 2.14 | 6.20E-01 | 0.027 | 0.024 | 1.10 | 0.77 - 1.59 | 1.85 | 2.38E-04 | NONE(dist=NONE), LINC00911(dist=400347)          | intergenic     |
| 8  | 66482521  | T | C | rs149718031 | 3.41E-01 | 0.078 | 0.068 | 1.15 | 0.91 - 1.46 | 2.35E-05 | 0.100 | 0.072 | 1.44 | 1.18 - 1.76 | 1.38 | 2.38E-04 | LINC01299(dist=7620), ARMC1(dist=32170)          | intergenic     |
| 14 | 62731724  | T | G | rs11158386  | 5.36E-01 | 0.395 | 0.395 | 1.00 | 0.88 - 1.14 | 6.08E-06 | 0.432 | 0.361 | 0.74 | 0.66 - 0.84 | 0.84 | 2.39E-04 | LINC00644(dist=125033), KCNH5(dist=441567)       | intergenic     |
| 2  | 140216853 | C | T | rs11899681  | 3.00E-01 | 0.481 | 0.488 | 1.03 | 0.91 - 1.16 | 1.62E-05 | 0.533 | 0.466 | 1.31 | 1.16        |      |          |                                                  |                |

|    |           |   |   |                       |          |       |       |      |             |          |       |       |      |             |      |          |                                              |                |
|----|-----------|---|---|-----------------------|----------|-------|-------|------|-------------|----------|-------|-------|------|-------------|------|----------|----------------------------------------------|----------------|
| 14 | 62730168  | T | A | rs4899068             | 5.83E-01 | 0.398 | 0.399 | 1.00 | 0.89 - 1.14 | 5.53E-06 | 0.427 | 0.352 | 0.73 | 0.65 - 0.82 | 0.84 | 2.45E-04 | LINC00644(dist=123477), KCNH5(dist=443123)   | intergenic     |
| 6  | 52086896  | C | T | rs524207              | 5.25E-05 | 0.389 | 0.438 | 1.22 | 1.08 - 1.39 | 2.15E-01 | 0.430 | 0.467 | 1.16 | 1.03 - 1.3  | 1.19 | 2.46E-04 | IL17A(dist=31460), IL17F(dist=14588)         | intergenic     |
| 8  | 127654091 | C | T | rs7461025             | 5.98E-01 | 0.243 | 0.216 | 1.16 | 1 - 1.35    | 1.61E-06 | 0.292 | 0.258 | 1.19 | 1.04 - 1.35 | 1.28 | 2.47E-04 | FAM84B(dist=83380), PCAT1(dist=371308)       | intergenic     |
| 8  | 66481105  | A | G | rs61124236            | 3.41E-01 | 0.078 | 0.068 | 1.15 | 0.91 - 1.46 | 2.50E-05 | 0.100 | 0.072 | 1.44 | 1.18 - 1.76 | 1.38 | 2.47E-04 | LINC01299(dist=6204), ARMC1(dist=33586)      | intergenic     |
| 4  | 58654764  | A | G | rs73191470            | 4.46E-01 | 0.045 | 0.041 | 1.09 | 0.8 - 1.47  | 7.86E-06 | 0.057 | 0.030 | 1.95 | 1.49 - 2.56 | 1.51 | 2.48E-04 | LOC101928851(dist=322612), NONE(dist=NONE)   | intergenic     |
| 8  | 66480622  | G | A | rs35416733            | 3.41E-01 | 0.078 | 0.068 | 1.15 | 0.91 - 1.46 | 2.52E-05 | 0.100 | 0.072 | 1.44 | 1.18 - 1.76 | 1.38 | 2.48E-04 | LINC01299(dist=5721), ARMC1(dist=34069)      | intergenic     |
| 8  | 66528604  | G | A | rs142339926           | 4.30E-01 | 0.079 | 0.069 | 1.15 | 0.91 - 1.45 | 9.07E-06 | 0.097 | 0.069 | 1.43 | 1.17 - 1.76 | 1.40 | 2.48E-04 | ARMC1                                        | intronic       |
| 3  | 146392038 | C | T | rs56367938            | 6.26E-05 | 0.040 | 0.063 | 0.62 | 0.46 - 0.84 | 2.25E-01 | 0.065 | 0.076 | 0.84 | 0.66 - 1.06 | 0.70 | 2.55E-04 | PLSCR5(dist=68035), ZIC4(dist=711797)        | intergenic     |
| 8  | 38898288  | A | G | rs58971487            | 7.72E-01 | 0.079 | 0.082 | 0.95 | 0.76 - 1.2  | 1.26E-06 | 0.115 | 0.073 | 1.65 | 1.36 - 2    | 1.37 | 2.55E-04 | ADAM9                                        | intronic       |
| 19 | 20407227  | C | A | rs56291329            | 2.90E-01 | 0.093 | 0.081 | 1.17 | 0.94 - 1.45 | 5.25E-05 | 0.111 | 0.086 | 1.32 | 1.09 - 1.6  | 1.40 | 2.55E-04 | ZNF486(dist=95928), MIR1270(dist=102854)     | intergenic     |
| 8  | 57792222  | G | A | rs4304324             | 2.93E-01 | 0.287 | 0.279 | 1.04 | 0.91 - 1.19 | 3.64E-05 | 0.318 | 0.259 | 1.34 | 1.18 - 1.52 | 1.20 | 2.56E-04 | LINC00968(dist=319840), IMPAD1(dist=78266)   | intergenic     |
| 15 | 89860931  | T | G | rs3176231             | 3.01E-01 | 0.064 | 0.061 | 1.07 | 0.83 - 1.38 | 2.83E-05 | 0.078 | 0.048 | 1.66 | 1.32 - 2.09 | 1.43 | 2.59E-04 | POLG                                         | intronic       |
| 1  | 1054893   | T | C | rs4970412;rs386627442 | 3.03E-01 | 0.476 | 0.477 | 1.00 | 0.88 - 1.13 | 2.00E-05 | 0.482 | 0.408 | 1.35 | 1.2 - 1.52  | 1.19 | 2.59E-04 | C1orf159(dist=3157), LINC01342(dist=17504)   | intergenic     |
| 4  | 58395759  | C | T | rs6814252             | 3.16E-01 | 0.032 | 0.028 | 1.19 | 0.83 - 1.7  | 3.42E-05 | 0.041 | 0.021 | 2.00 | 1.45 - 2.75 | 1.71 | 2.59E-04 | LOC101928851(dist=63607), NONE(dist=NONE)    | intergenic     |
| 11 | 102694600 | G | A | rs142132409           | 2.41E-01 | 0.034 | 0.029 | 1.17 | 0.83 - 1.66 | 4.74E-05 | 0.046 | 0.025 | 1.89 | 1.4 - 2.55  | 1.66 | 2.60E-04 | WTAPP1                                       | ncRNA_intronic |
| 16 | 2071081   | A | G | rs138546243           | 1.55E-05 | 0.054 | 0.034 | 1.64 | 1.22 - 2.21 | 4.01E-01 | 0.033 | 0.027 | 1.22 | 0.87 - 1.7  | 1.73 | 2.66E-04 | NPW                                          | downstream     |
| 8  | 57795779  | G | A | rs16921243            | 2.93E-01 | 0.287 | 0.279 | 1.04 | 0.91 - 1.19 | 3.80E-05 | 0.316 | 0.257 | 1.34 | 1.18 - 1.52 | 1.20 | 2.68E-04 | LINC00968(dist=323397), IMPAD1(dist=74709)   | intergenic     |
| 14 | 62728273  | T | G | rs12185062            | 6.00E-01 | 0.396 | 0.398 | 1.01 | 0.89 - 1.14 | 5.56E-06 | 0.428 | 0.353 | 0.73 | 0.65 - 0.82 | 0.84 | 2.68E-04 | LINC00644(dist=121582), KCNH5(dist=445018)   | intergenic     |
| 14 | 62730856  | G | A | rs10151292            | 5.75E-01 | 0.398 | 0.399 | 1.00 | 0.88 - 1.14 | 6.40E-06 | 0.432 | 0.360 | 0.74 | 0.65 - 0.83 | 0.84 | 2.71E-04 | LINC00644(dist=124165), KCNH5(dist=442435)   | intergenic     |
| 8  | 38909156  | G | A | rs73674693            | 8.18E-01 | 0.080 | 0.084 | 0.95 | 0.76 - 1.19 | 1.15E-06 | 0.117 | 0.074 | 1.66 | 1.37 - 2.01 | 1.36 | 2.73E-04 | ADAM9                                        | intronic       |
| 14 | 85312224  | G | C | rs76532095            | 4.02E-05 | 0.089 | 0.062 | 1.48 | 1.18 - 1.87 | 2.67E-01 | 0.064 | 0.054 | 1.18 | 0.93 - 1.51 | 1.43 | 2.74E-04 | NONE(dist=NONE), LINC00911(dist=547999)      | intergenic     |
| 14 | 62727663  | G | C | rs12889289            | 6.17E-01 | 0.396 | 0.398 | 1.01 | 0.89 - 1.14 | 5.28E-06 | 0.428 | 0.353 | 0.73 | 0.65 - 0.82 | 0.84 | 2.75E-04 | LINC00644(dist=120972), KCNH5(dist=445628)   | intergenic     |
| 3  | 30198702  | T | C | rs142984678           | 5.16E-01 | 0.023 | 0.022 | 1.02 | 0.67 - 1.55 | 1.50E-05 | 0.041 | 0.023 | 1.86 | 1.36 - 2.55 | 1.84 | 2.87E-04 | RBMS3(dist=146816), TGFBR2(dist=449292)      | intergenic     |
| 4  | 58639261  | A | C | rs1509537             | 5.19E-01 | 0.048 | 0.045 | 1.07 | 0.8 - 1.44  | 6.14E-06 | 0.057 | 0.030 | 1.97 | 1.5 - 2.59  | 1.50 | 2.88E-04 | LOC101928851(dist=307109), NONE(dist=NONE)   | intergenic     |
| 8  | 61461279  | G | C | rs184250282           | 2.35E-05 | 0.243 | 0.297 | 0.76 | 0.66 - 0.88 | 2.76E-01 | 0.258 | 0.271 | 0.94 | 0.82 - 1.07 | 0.81 | 2.91E-04 | RAB2A                                        | intronic       |
| 8  | 61511366  | A | C | rs6995515             | 5.64E-05 | 0.337 | 0.396 | 0.68 | 0.68 - 0.88 | 2.02E-01 | 0.366 | 0.384 | 0.93 | 0.82 - 1.04 | 0.84 | 2.93E-04 | RAB2A                                        | intronic       |
| 3  | 61144427  | T | C | rs17064527            | 2.11E-01 | 0.061 | 0.055 | 1.12 | 0.86 - 1.45 | 5.24E-05 | 0.065 | 0.040 | 1.66 | 1.29 - 2.12 | 1.47 | 2.95E-04 | FHIT                                         | intronic       |
| 21 | 34031856  | C | T | rs845006              | 4.42E-06 | 0.111 | 0.161 | 0.65 | 0.54 - 0.79 | 5.60E-01 | 0.134 | 0.136 | 0.98 | 0.82 - 1.16 | 0.78 | 2.96E-04 | SYNJ1                                        | intronic       |
| 8  | 66476668  | A | G | rs181816253           | 3.83E-01 | 0.081 | 0.073 | 1.13 | 0.9 - 1.42  | 2.44E-05 | 0.106 | 0.078 | 1.41 | 1.16 - 1.72 | 1.37 | 3.00E-04 | LINC01299(dist=1767), ARMC1(dist=38023)      | intergenic     |
| 13 | 48963316  | T | A | rs77573355            | 2.41E-01 | 0.093 | 0.087 | 1.08 | 0.87 - 1.33 | 5.11E-05 | 0.105 | 0.068 | 1.60 | 1.31 - 1.95 | 1.36 | 3.00E-04 | RB1                                          | intronic       |
| 2  | 103001402 | C | T | rs1035130             | 3.45E-01 | 0.148 | 0.153 | 0.96 | 0.81 - 1.14 | 2.10E-05 | 0.126 | 0.176 | 0.67 | 0.57 - 0.8  | 0.80 | 3.02E-04 | IL18R1                                       | exonic         |
| 3  | 116942043 | C | T | rs9757453             | 3.42E-05 | 0.250 | 0.297 | 1.27 | 1.1 - 1.46  | 2.87E-01 | 0.280 | 0.298 | 1.09 | 0.96 - 1.24 | 1.20 | 3.05E-04 | LINC00901(dist=290958), IGSF11(dist=1677436) | intergenic     |
| 2  | 224823604 | C | A | rs73992134            | 5.87E-07 | 0.052 | 0.025 | 2.13 | 1.54 - 2.93 | 7.20E-01 | 0.026 | 0.027 | 0.99 | 0.68 - 1.42 | 1.68 | 3.06E-04 | MRPL44                                       | intronic       |
| 8  | 66474399  | G | A | rs7008671             | 3.29E-01 | 0.078 | 0.068 | 1.16 | 0.91 - 1.46 | 3.61E-05 | 0.098 | 0.071 | 1.43 | 1.17 - 1.75 | 1.38 | 3.06E-04 | LINC01299                                    | ncRNA_intronic |
| 5  | 131253630 | T | C | rs149204682           | 2.67E-05 | 0.044 | 0.027 | 1.68 | 1.21 - 2.34 | 3.37E-01 | 0.034 | 0.028 | 1.21 | 0.87 - 1.69 | 1.72 | 3.07E-04 | MEIKIN                                       | intronic       |
| 5  | 117739303 | T | C | rs58895319            | 5.71E-01 | 0.088 | 0.088 | 1.00 | 0.8 - 1.24  | 3.54E-06 | 0.112 | 0.074 | 1.58 | 1.3 - 1.92  | 1.39 | 3.07E-04 | LOC101927280                                 | ncRNA_intronic |
| 10 | 45580512  | T | C | rs146136939           | 3.90E-01 | 0.030 | 0.028 | 1.05 | 0.73 - 1.52 | 3.02E-05 | 0.043 | 0.022 | 1.98 | 1.45 - 2.7  | 1.70 | 3.12E-04 | ZNF22(dist=79735), RSU1P2(dist=14412)        | intergenic     |
| 1  | 237844546 | G | A | rs16835619            | 1.20E-01 | 0.087 | 0.080 | 1.11 | 0.88 - 1.38 | 5.96E-05 | 0.081 | 0.057 | 1.46 | 1.17 - 1.82 | 1.46 | 3.12E-04 | RYR2                                         | intronic       |
| 8  | 66556187  | C | T | rs10504389            | 4.50E-01 | 0.078 | 0.070 | 1.13 | 0.9 - 1.43  | 1.63E-05 | 0.101 | 0.072 | 1.45 | 1.18 - 1.77 | 1.37 | 3.13E-04 | MTFR1                                        | upstream       |
| 8  | 38889598  | C | T | rs78227456            | 8.63E-01 | 0.076 | 0.080 | 0.94 | 0.75 - 1.19 | 1.13E-06 | 0.113 | 0.071 | 1.68 | 1.38 - 2.03 | 1.36 | 3.14E-04 | ADAM9                                        | intronic       |
| 1  | 1042483   | C | T | rs12733365            | 3.19E-01 | 0.460 | 0.460 | 1.00 | 0.88 - 1.13 | 2.86E-05 | 0.488 | 0.414 | 1.35 | 1.2 - 1.52  | 1.18 | 3.14E-04 | C1orf159                                     | intronic       |
| 8  | 38889871  | G | A | rs143600640           | 8.63E-01 | 0.076 | 0.080 | 0.94 | 0.75 - 1.19 | 1.14E-06 | 0.113 | 0.071 | 1.67 | 1.38 - 2.03 | 1.36 | 3.15E-04 | ADAM9                                        | intronic       |
| 8  | 38859104  | G | A | rs59451782            | 8.45E-01 | 0.072 | 0.076 | 0.94 | 0.74 - 1.19 | 1.65E-06 | 0.111 | 0.069 | 1.69 | 1.39 - 2.05 | 1.36 | 3.15E-04 | ADAM9                                        | intronic       |
| 8  | 38880401  | T | C | rs140954145           | 8.64E-01 | 0.076 | 0.080 | 0.94 | 0.75 - 1.19 | 1.14E-06 | 0.113 | 0.070 | 1.68 | 1.38 - 2.03 | 1.36 | 3.16E-04 | ADAM9                                        | intronic       |
| 17 | 32566741  | G | A | rs62054927            | 2.74E-05 | 0.083 | 0.056 | 1.52 | 1.2 - 1.93  | 3.05E-01 | 0.071 | 0.067 | 1.06 | 0.84 - 1.33 | 1.53 | 3.20E-04 | LOC101927239(dist=56090), CCL2(dist=15555)   | intergenic     |
| 7  | 113507691 | G | A | rs10808174            | 5.74E-01 | 0.479 | 0.477 | 0.99 | 0.88 - 1.12 | 5.68E-06 | 0.521 | 0.451 | 0.76 | 0.67 - 0.85 | 0.84 | 3.23E-04 | LINC00998(dist=749054), PPP1R3A(dist=9191)   | intergenic     |
| 14 | 62730395  | A | C | rs4902121             | 5.78E-01 | 0.397 | 0.398 | 1.00 | 0.88 - 1.14 | 4.77E-06 | 0.420 | 0.350 | 0.74 | 0.66 - 0.84 | 0.84 | 3.23E-04 | LINC00644(dist=123704), KCNH5(dist=442896)   | intergenic     |
| 2  | 18477797  | C | A | rs147511530           | 2.75E-01 | 0.225 | 0.218 | 1.04 | 0.89 - 1.21 | 2.51E-05 | 0.245 | 0.198 | 1.32 | 1.15 - 1.51 | 1.28 | 3.25E-04 | KCNS3(dist=363572), RDH14(dist=258192)       | intergenic     |
| 10 | 45584974  | T | C | rs1856597             | 3.98E-01 | 0.030 | 0.028 | 1.05 | 0.73 - 1.52 | 3.08E-05 | 0.043 | 0.022 | 1.97 | 1.44 - 2.68 | 1.70 | 3.27E-04 | ZNF22(dist=84197), RSU1P2(dist=9950)         | intergenic     |
| 5  | 31709063  | T | C | rs10040188            | 3.02E-05 | 0.464 | 0.401 | 0.77 | 0.68 - 0.88 | 3.55E-01 | 0.438 | 0.428 | 0.96 | 0.85 - 1.08 | 0.83 | 3.28E-04 | C5orf22(dist=153898), PDZD2(dist=89968)      | intergenic     |
| 21 | 41263944  | A | G | rs12627485            | 3.76E-05 | 0.184 | 0.234 | 0.74 | 0.63 - 0.86 | 2.41E-01 | 0.217 | 0.224 | 0.96 | 0.83 - 1.11 | 0.80 | 3.29E-04 | PCP4                                         | intronic       |
| 13 | 56745881  | A | G | rs77735226            | 3.96E-01 | 0.154 | 0.170 | 0.89 | 0.75 - 1.05 | 3.34E-05 | 0.130 | 0.169 | 0.73 | 0.62 - 0.87 | 0.80 | 3.34E-04 | MIR5007(dist=997198), PRR20D(dist=969171)    | intergenic     |
| 14 | 62732172  | A | G | rs34956369;rs11158388 | 5.96E-01 | 0.398 | 0.400 | 1.01 | 0.89 - 1.14 | 6.78E-06 | 0.443 | 0.373 | 0.75 | 0.66 - 0.84 | 0.84 | 3.40E-04 | LINC00644(dist=125481), KCNH5(dist=441119)   | intergenic     |
| 2  | 103029165 | A | T | rs11693955            | 2.54E-01 | 0.145 | 0.152 | 0.95 | 0.79 - 1.13 | 6.08E-05 | 0.126 | 0.174 | 0.68 | 0.58 - 0.81 | 0.80 | 3.42E-04 | IL18R1(dist=13930), IL18RAP(dist=6085)       | intergenic     |
| 2  | 103006387 | A | G | rs4851570             | 2.74E-01 | 0.146 | 0.152 | 0.95 | 0.8 - 1.13  | 5.05E-05 | 0.127 | 0.176 | 0.68 | 0.58 - 0.81 | 0.80 | 3.43E-04 | IL18R1                                       | intronic       |
| 7  | 79047850  | A | C | rs80041322            | 3.52E-01 | 0.075 | 0.070 | 1.07 | 0.85 - 1.36 | 1.99E-05 | 0.098 | 0.066 | 1.54 | 1.25 - 1.89 | 1.39 | 3.44E-04 | MAGI2                                        | intronic       |
| 2  | 224805727 | T | C | rs184109162           | 6.44E-07 | 0.051 | 0.025 | 2.13 | 1.54 - 2.94 | 7.86E-01 | 0.028 | 0.028 | 1.01 | 0.71 - 1.43 | 1.67 | 3.46E-04 | WDFY1                                        | intronic       |
| 1  | 172929238 | G | A | rs74711045            | 3.28E-01 | 0.039 | 0.035 | 1.13 | 0.82 - 1.57 | 1.81E-05 | 0.044 | 0.023 | 1.99 | 1.46 - 2.7  | 1.63 | 3.48E-04 | FASLG(dist=293226), TNFSF18(dist=81122)      | intergenic     |
| 8  | 57801081  | G | A | rs6996264             | 3.49E-01 | 0.289 | 0.283 | 1.03 | 0.9 - 1.18  | 3.5      |       |       |      |             |      |          |                                              |                |

|    |           |   |   |                        |          |       |       |      |      |       |          |       |       |      |      |       |      |          |                                                   |                |
|----|-----------|---|---|------------------------|----------|-------|-------|------|------|-------|----------|-------|-------|------|------|-------|------|----------|---------------------------------------------------|----------------|
| 2  | 102995020 | G | A | rs2080289              | 3.79E-01 | 0.149 | 0.153 | 0.97 | 0.81 | -1.15 | 2.08E-05 | 0.126 | 0.176 | 0.67 | 0.57 | -0.8  | 0.80 | 3.61E-04 | IL18R1                                            | intronic       |
| 2  | 102997733 | G | T | rs11465633             | 3.68E-01 | 0.148 | 0.153 | 0.97 | 0.81 | -1.15 | 2.26E-05 | 0.126 | 0.176 | 0.67 | 0.57 | -0.8  | 0.80 | 3.61E-04 | IL18R1                                            | intronic       |
| 7  | 137566107 | A | G | rs115675456            | 3.82E-05 | 0.041 | 0.028 | 1.51 | 1.08 | -2.11 | 4.14E-01 | 0.024 | 0.020 | 1.18 | 0.8  | -1.74 | 2.01 | 3.62E-04 | CREB3L2                                           | intronic       |
| 2  | 102997174 | A | T | rs3771162              | 3.69E-01 | 0.148 | 0.153 | 0.97 | 0.81 | -1.15 | 2.26E-05 | 0.126 | 0.176 | 0.67 | 0.57 | -0.8  | 0.80 | 3.62E-04 | IL18R1                                            | intronic       |
| 2  | 102996872 | C | T | rs3821203              | 3.70E-01 | 0.148 | 0.153 | 0.97 | 0.81 | -1.15 | 2.25E-05 | 0.126 | 0.176 | 0.67 | 0.57 | -0.8  | 0.80 | 3.63E-04 | IL18R1                                            | intronic       |
| 4  | 58166994  | G | T | rs56062419             | 8.07E-01 | 0.042 | 0.042 | 1.00 | 0.74 | -1.37 | 5.18E-07 | 0.053 | 0.027 | 2.02 | 1.52 | -2.67 | 1.56 | 3.64E-04 | IGFBP7-AS1(dist=95529), LOC101928851(dist=125044) | intergenic     |
| 4  | 7755272   | G | A | rs16841024             | 3.64E-06 | 0.050 | 0.029 | 1.78 | 1.3  | -2.43 | 6.88E-01 | 0.035 | 0.031 | 1.11 | 0.8  | -1.54 | 1.65 | 3.65E-04 | AFAP1-AS1                                         | upstream       |
| 8  | 38876836  | T | C | rs56316649             | 9.22E-01 | 0.077 | 0.082 | 0.93 | 0.74 | -1.18 | 1.16E-06 | 0.115 | 0.072 | 1.68 | 1.39 | -2.04 | 1.35 | 3.67E-04 | ADAM9                                             | intronic       |
| 7  | 79028914  | G | C | rs77157421             | 3.31E-01 | 0.075 | 0.070 | 1.08 | 0.85 | -1.37 | 2.61E-05 | 0.096 | 0.065 | 1.53 | 1.24 | -1.88 | 1.40 | 3.68E-04 | MAGI2                                             | intronic       |
| 2  | 102994884 | A | G | rs17027037             | 3.73E-01 | 0.149 | 0.153 | 0.97 | 0.81 | -1.15 | 2.25E-05 | 0.126 | 0.176 | 0.67 | 0.57 | -0.8  | 0.80 | 3.69E-04 | IL18R1                                            | intronic       |
| 4  | 58217300  | A | G | rs73818809             | 5.59E-01 | 0.032 | 0.030 | 1.06 | 0.75 | -1.52 | 4.96E-06 | 0.043 | 0.021 | 2.09 | 1.53 | -2.87 | 1.64 | 3.69E-04 | IGFBP7-AS1(dist=145835), LOC101928851(dist=74738) | intergenic     |
| 9  | 130386355 | A | G | rs71495654;rs188914096 | 1.37E-05 | 0.115 | 0.087 | 1.37 | 1.12 | -1.68 | 3.70E-01 | 0.100 | 0.092 | 1.09 | 0.89 | -1.33 | 1.41 | 3.70E-04 | STXBP1                                            | intronic       |
| 14 | 62750791  | G | A | rs12889730             | 4.25E-01 | 0.404 | 0.394 | 1.04 | 0.92 | -1.18 | 3.16E-05 | 0.436 | 0.371 | 1.31 | 1.16 | -1.48 | 1.18 | 3.70E-04 | LINC00644(dist=144100), KCNH5(dist=422500)        | intergenic     |
| 2  | 103007567 | T | C | rs17027060             | 2.83E-01 | 0.146 | 0.152 | 0.95 | 0.8  | -1.13 | 5.28E-05 | 0.128 | 0.176 | 0.68 | 0.58 | -0.81 | 0.80 | 3.71E-04 | IL18R1                                            | intronic       |
| 20 | 8162808   | A | C | rs73895566             | 4.89E-05 | 0.096 | 0.067 | 1.48 | 1.18 | -1.85 | 4.83E-01 | 0.055 | 0.049 | 1.14 | 0.88 | -1.48 | 1.43 | 3.72E-04 | PLCB1                                             | intronic       |
| 2  | 102992079 | A | G | rs2270298              | 3.73E-01 | 0.149 | 0.153 | 0.97 | 0.81 | -1.15 | 2.30E-05 | 0.126 | 0.176 | 0.67 | 0.57 | -0.8  | 0.80 | 3.73E-04 | IL18R1                                            | intronic       |
| 2  | 224830579 | T | G | rs76359982             | 1.16E-06 | 0.052 | 0.026 | 2.02 | 1.47 | -2.77 | 7.90E-01 | 0.027 | 0.027 | 1.00 | 0.69 | -1.43 | 1.68 | 3.74E-04 | MRPL44                                            | intronic       |
| 9  | 21339969  | C | A | rs12237982             | 3.54E-01 | 0.300 | 0.293 | 1.04 | 0.9  | -1.19 | 4.81E-05 | 0.337 | 0.283 | 1.29 | 1.14 | -1.46 | 1.20 | 3.76E-04 | KLHL9(dist=4540), IFNA6(dist=10348)               | intergenic     |
| 18 | 6557401   | G | A | rs78408598             | 8.20E-01 | 0.146 | 0.150 | 0.97 | 0.81 | -1.16 | 9.65E-07 | 0.195 | 0.144 | 1.44 | 1.24 | -1.68 | 1.29 | 3.78E-04 | LINC01387                                         | ncRNA_intronic |
| 6  | 14767040  | T | A | rs9476656              | 9.00E-06 | 0.419 | 0.461 | 1.19 | 1.05 | -1.35 | 4.46E-01 | 0.529 | 0.492 | 1.16 | 1.03 | -1.3  | 1.19 | 3.79E-04 | LINC01108(dist=481355), JARID2(dist=479166)       | intergenic     |
| 13 | 49081064  | C | G | rs9332022              | 4.63E-01 | 0.091 | 0.088 | 1.04 | 0.84 | -1.29 | 1.98E-05 | 0.123 | 0.081 | 1.60 | 1.33 | -1.93 | 1.32 | 3.79E-04 | RCBTB2                                            | intronic       |
| 11 | 48369201  | A | G | rs11039690             | 3.10E-01 | 0.497 | 0.499 | 0.99 | 0.88 | -1.13 | 6.11E-05 | 0.526 | 0.459 | 0.77 | 0.68 | -0.86 | 0.84 | 3.82E-04 | OR4C45                                            | intronic       |
| 7  | 79032723  | T | C | rs78250065             | 3.34E-01 | 0.075 | 0.070 | 1.08 | 0.85 | -1.37 | 2.72E-05 | 0.096 | 0.065 | 1.53 | 1.24 | -1.88 | 1.39 | 3.82E-04 | MAGI2                                             | intronic       |
| 7  | 89765561  | T | C | rs39253                | 1.37E-05 | 0.306 | 0.250 | 0.75 | 0.66 | -0.86 | 4.26E-01 | 0.271 | 0.261 | 0.95 | 0.83 | -1.08 | 0.82 | 3.83E-04 | STEAP2-AS1                                        | ncRNA_intronic |
| 8  | 38969233  | C | A | rs146477036            | 8.47E-01 | 0.079 | 0.083 | 0.95 | 0.76 | -1.19 | 2.42E-06 | 0.117 | 0.076 | 1.61 | 1.33 | -1.95 | 1.36 | 3.84E-04 | ADAM32                                            | intronic       |
| 11 | 5436978   | C | G | rs137890408            | 2.98E-01 | 0.367 | 0.365 | 0.99 | 0.87 | -1.13 | 5.88E-05 | 0.417 | 0.354 | 0.77 | 0.68 | -0.86 | 0.84 | 3.86E-04 | OR51B5                                            | intronic       |
| 6  | 89994698  | C | G | rs9362632              | 1.88E-05 | 0.199 | 0.249 | 0.75 | 0.64 | -0.87 | 4.47E-01 | 0.216 | 0.228 | 0.93 | 0.81 | -1.07 | 0.81 | 3.89E-04 | GABRR2                                            | intronic       |
| 2  | 103008969 | C | G | rs66919607             | 2.88E-01 | 0.146 | 0.152 | 0.95 | 0.8  | -1.13 | 5.47E-05 | 0.128 | 0.176 | 0.69 | 0.58 | -0.81 | 0.80 | 3.90E-04 | IL18R1                                            | intronic       |
| 2  | 140219123 | G | A | rs34033127             | 3.89E-01 | 0.479 | 0.483 | 1.02 | 0.9  | -1.15 | 1.71E-05 | 0.537 | 0.469 | 1.31 | 1.17 | -1.48 | 1.18 | 3.92E-04 | YY1P2(dist=562379), LRP1B(dist=769873)            | intergenic     |
| 5  | 124302505 | C | T | rs139618815            | 3.00E-05 | 0.084 | 0.126 | 0.64 | 0.52 | -0.79 | 3.39E-01 | 0.106 | 0.109 | 0.96 | 0.8  | -1.16 | 0.75 | 3.93E-04 | ZNF608(dist=221700), LOC101927421(dist=70019)     | intergenic     |
| 12 | 98558696  | A | C | rs12317134             | 4.40E-01 | 0.092 | 0.090 | 1.03 | 0.83 | -1.28 | 3.19E-05 | 0.120 | 0.081 | 1.55 | 1.28 | -1.87 | 1.32 | 3.97E-04 | MIR4303(dist=169470), SLC9A7P1(dist=288923)       | intergenic     |
| 3  | 102475861 | T | C | rs114157925            | 2.84E-01 | 0.040 | 0.036 | 1.11 | 0.81 | -1.54 | 2.21E-05 | 0.040 | 0.024 | 1.70 | 1.24 | -2.32 | 1.77 | 4.00E-04 | ZPLD1(dist=277176), MIR548AB(dist=767016)         | intergenic     |
| 4  | 58204763  | T | C | rs73819101             | 4.83E-01 | 0.033 | 0.030 | 1.09 | 0.77 | -1.55 | 9.68E-06 | 0.041 | 0.020 | 2.07 | 1.5  | -2.86 | 1.65 | 4.04E-04 | IGFBP7-AS1(dist=133298), LOC101928851(dist=87275) | intergenic     |
| 4  | 58108131  | T | C | rs13147707             | 5.15E-01 | 0.273 | 0.282 | 0.96 | 0.83 | -1.1  | 2.11E-05 | 0.221 | 0.270 | 0.77 | 0.67 | -0.86 | 0.84 | 4.06E-04 | IGFBP7-AS1(dist=36666), LOC101928851(dist=183907) | intergenic     |
| 2  | 224830584 | T | C | rs77875219             | 9.20E-07 | 0.051 | 0.025 | 2.06 | 1.49 | -2.84 | 7.33E-01 | 0.026 | 0.027 | 0.99 | 0.69 | -1.42 | 1.68 | 4.08E-04 | MRPL44                                            | intronic       |
| 7  | 46073649  | C | G | rs1540824              | 2.90E-01 | 0.410 | 0.385 | 0.90 | 0.79 | -1.02 | 5.52E-05 | 0.489 | 0.439 | 0.82 | 0.73 | -0.92 | 0.85 | 4.08E-04 | IGFBP3(dist=112778), TNS3(dist=1241103)           | intergenic     |
| 10 | 15466017  | G | C | rs55842426             | 3.40E-01 | 0.118 | 0.106 | 1.13 | 0.93 | -1.37 | 6.04E-05 | 0.136 | 0.104 | 1.36 | 1.14 | -1.62 | 1.30 | 4.09E-04 | FAM171A1(dist=52959), ITGA8(dist=89931)           | intergenic     |
| 7  | 79052139  | T | C | rs17152485             | 4.05E-01 | 0.075 | 0.072 | 1.06 | 0.83 | -1.34 | 1.67E-05 | 0.098 | 0.066 | 1.54 | 1.26 | -1.89 | 1.39 | 4.13E-04 | MAGI2                                             | intronic       |
| 15 | 99738917  | A | G | rs73463359             | 3.31E-01 | 0.109 | 0.122 | 0.88 | 0.72 | -1.07 | 5.68E-05 | 0.085 | 0.117 | 0.70 | 0.57 | -0.86 | 0.78 | 4.16E-04 | TTC23                                             | intronic       |
| 11 | 5436753   | A | T | rs77256782             | 3.96E-01 | 0.385 | 0.387 | 1.01 | 0.89 | -1.15 | 2.97E-05 | 0.437 | 0.372 | 0.76 | 0.68 | -0.86 | 0.84 | 4.17E-04 | OR51B5                                            | intronic       |
| 8  | 38839492  | G | T | rs111979509            | 9.43E-01 | 0.074 | 0.079 | 0.94 | 0.74 | -1.18 | 1.19E-06 | 0.111 | 0.068 | 1.70 | 1.4  | -2.07 | 1.35 | 4.20E-04 | HTRA4                                             | intronic       |
| 15 | 75304754  | C | T | rs78434425             | 3.63E-01 | 0.052 | 0.044 | 1.21 | 0.91 | -1.61 | 2.81E-05 | 0.069 | 0.047 | 1.51 | 1.19 | -1.91 | 1.51 | 4.21E-04 | SCAMP5                                            | intronic       |
| 3  | 124247149 | G | A | rs332414               | 6.03E-01 | 0.109 | 0.094 | 0.85 | 0.7  | -1.05 | 1.15E-05 | 0.139 | 0.107 | 0.74 | 0.62 | -0.88 | 0.76 | 4.23E-04 | KALRN                                             | intronic       |
| 17 | 42330122  | C | T | rs1476512              | 4.01E-05 | 0.143 | 0.085 | 1.79 | 1.48 | -2.17 | 2.90E-01 | 0.160 | 0.169 | 0.94 | 0.8  | -1.1  | 1.30 | 4.29E-04 | SLC4A1                                            | intronic       |
| 9  | 36135779  | G | A | rs7025470              | 1.43E-05 | 0.116 | 0.082 | 1.47 | 1.2  | -1.8  | 5.30E-01 | 0.084 | 0.075 | 1.13 | 0.91 | -1.4  | 1.36 | 4.32E-04 | GLIPR2                                            | upstream       |
| 14 | 62761877  | G | A | rs8007207;rs386778162  | 4.58E-01 | 0.401 | 0.392 | 1.04 | 0.92 | -1.18 | 3.35E-05 | 0.428 | 0.363 | 1.31 | 1.16 | -1.48 | 1.17 | 4.35E-04 | LINC00644(dist=155186), KCNH5(dist=411414)        | intergenic     |
| 6  | 14764738  | G | A | rs747487               | 2.54E-05 | 0.363 | 0.404 | 0.84 | 0.74 | -0.96 | 4.29E-01 | 0.388 | 0.421 | 0.87 | 0.77 | -0.98 | 0.84 | 4.36E-04 | LINC01108(dist=479053), JARID2(dist=481468)       | intergenic     |
| 2  | 103015918 | C | T | rs17027087             | 2.91E-01 | 0.146 | 0.152 | 0.95 | 0.8  | -1.13 | 6.31E-05 | 0.126 | 0.174 | 0.68 | 0.58 | -0.81 | 0.80 | 4.39E-04 | IL18R1                                            | downstream     |
| 15 | 99709018  | C | T | rs73482328             | 3.46E-01 | 0.109 | 0.122 | 0.88 | 0.73 | -1.07 | 5.32E-05 | 0.085 | 0.117 | 0.70 | 0.57 | -0.86 | 0.78 | 4.41E-04 | TTC23                                             | intronic       |
| 1  | 118141596 | A | G | rs374959453;rs10923350 | 5.96E-01 | 0.233 | 0.240 | 0.96 | 0.83 | -1.12 | 3.27E-06 | 0.211 | 0.262 | 0.75 | 0.65 | -0.87 | 0.82 | 4.41E-04 | LOC100996263                                      | ncRNA_intronic |
| 3  | 64009508  | T | C | rs40610                | 9.94E-01 | 0.216 | 0.219 | 0.98 | 0.85 | -1.14 | 1.23E-06 | 0.273 | 0.217 | 1.36 | 1.19 | -1.55 | 1.21 | 4.41E-04 | PSMD6                                             | exonic         |
| 8  | 38840708  | G | C | rs80147677             | 9.54E-01 | 0.074 | 0.079 | 0.93 | 0.74 | -1.18 | 1.26E-06 | 0.111 | 0.068 | 1.70 | 1.4  | -2.07 | 1.35 | 4.43E-04 | HTRA4                                             | intronic       |
| 21 | 34044243  | C | T | rs845026               | 4.51E-06 | 0.111 | 0.161 | 0.65 | 0.54 | -0.79 | 6.53E-01 | 0.137 | 0.138 | 0.99 | 0.83 | -1.17 | 0.79 | 4.44E-04 | SYNJ1                                             | intronic       |
| 15 | 99712027  | G | A | rs113199254            | 3.49E-01 | 0.109 | 0.122 | 0.88 | 0.73 | -1.07 | 5.24E-05 | 0.084 | 0.116 | 0.70 | 0.57 | -0.86 | 0.78 | 4.45E-04 | TTC23                                             | intronic       |
| 5  | 147024476 | C | A | rs2116766              | 2.72E-01 | 0.393 | 0.426 | 0.87 | 0.77 | -0.99 | 5.11E-05 | 0.338 | 0.373 | 0.86 | 0.76 | -0.97 | 0.85 | 4.49E-04 | JAKMIP2                                           | exonic         |
| 1  | 1044424   | T | C | rs57107904             | 2.88E-01 | 0.414 | 0.411 | 1.01 | 0.89 | -1.14 | 5.06E-05 | 0.426 | 0.363 | 1.30 | 1.16 | -1.47 | 1.19 | 4.50E-04 | C1orf159                                          | intronic       |
| 15 | 99719303  | A | G | rs59742583             | 3.51E-01 | 0.109 | 0.122 | 0.88 | 0.73 | -1.07 | 5.36E-05 | 0.085 | 0.117 | 0.70 | 0.57 | -0.86 | 0.78 | 4.53E-04 | TTC23                                             | intronic       |
| 7  | 46073275  | T | C | rs1540825              | 3.05E-01 | 0.414 | 0.390 | 0.90 | 0.8  | -1.03 | 6.00E-05 | 0.489 | 0.439 | 0.82 | 0.73 | -0.92 | 0.85 | 4.59E-04 | IGFBP3(dist=112404), TNS3(dist=1241477)           |                |

|    |           |   |   |                         |          |       |       |      |      |       |          |       |       |      |      |       |      |          |                                                   |                |
|----|-----------|---|---|-------------------------|----------|-------|-------|------|------|-------|----------|-------|-------|------|------|-------|------|----------|---------------------------------------------------|----------------|
| 14 | 69498110  | T | C | rs4338726               | 5.96E-05 | 0.441 | 0.379 | 1.29 | 1.14 | -1.47 | 3.69E-01 | 0.391 | 0.376 | 1.07 | 0.95 | -1.21 | 1.18 | 4.66E-04 | ACTN1-AS1(dist=43930), DCAF5(dist=19527)          | intergenic     |
| 7  | 79046112  | G | A | rs2190180               | 3.18E-01 | 0.075 | 0.070 | 1.08 | 0.85 | -1.37 | 4.50E-05 | 0.096 | 0.066 | 1.51 | 1.23 | -1.86 | 1.39 | 4.66E-04 | MAGI2                                             | intronic       |
| 7  | 79061474  | C | T | rs28469849              | 3.18E-01 | 0.076 | 0.071 | 1.08 | 0.85 | -1.37 | 5.22E-05 | 0.098 | 0.067 | 1.51 | 1.23 | -1.85 | 1.38 | 4.67E-04 | MAGI2                                             | intronic       |
| 14 | 30787427  | T | C | rs189793559             | 3.00E-01 | 0.027 | 0.034 | 0.78 | 0.54 | -1.12 | 3.86E-05 | 0.016 | 0.031 | 0.52 | 0.33 | -0.8  | 0.59 | 4.74E-04 | PRKD1(dist=390528), G2E3(dist=240902)             | intergenic     |
| 4  | 20596679  | C | T | rs6847533               | 2.01E-05 | 0.163 | 0.220 | 0.69 | 0.59 | -0.81 | 5.68E-01 | 0.190 | 0.188 | 1.01 | 0.87 | -1.18 | 0.80 | 4.75E-04 | SLIT2                                             | intronic       |
| 14 | 62756176  | A | G | rs12882108              | 4.49E-01 | 0.400 | 0.390 | 1.04 | 0.92 | -1.18 | 4.40E-05 | 0.433 | 0.369 | 1.31 | 1.16 | -1.47 | 1.17 | 4.75E-04 | LINC00644(dist=149485), KCNH5(dist=417115)        | intergenic     |
| 21 | 34013779  | A | G | rs28449995              | 1.24E-05 | 0.108 | 0.155 | 0.66 | 0.55 | -0.8  | 5.35E-01 | 0.131 | 0.134 | 0.97 | 0.82 | -1.16 | 0.79 | 4.77E-04 | SYNJ1                                             | intronic       |
| 7  | 158015457 | T | C | rs6948273               | 5.20E-01 | 0.288 | 0.280 | 0.96 | 0.84 | -1.1  | 1.53E-05 | 0.265 | 0.330 | 1.37 | 1.2  | -1.56 | 1.19 | 4.78E-04 | PTRN2                                             | intronic       |
| 14 | 26621638  | A | G | rs17489782              | 9.26E-01 | 0.026 | 0.021 | 1.25 | 0.84 | -1.88 | 6.53E-06 | 0.055 | 0.038 | 1.47 | 1.13 | -1.92 | 1.64 | 4.82E-04 | STXBP6(dist=1102135), NOVA1(dist=293451)          | intergenic     |
| 14 | 62730285  | C | A | rs4899069               | 7.48E-01 | 0.383 | 0.387 | 1.02 | 0.9  | -1.16 | 5.95E-06 | 0.411 | 0.339 | 0.73 | 0.65 | -0.83 | 0.85 | 4.84E-04 | LINC00644(dist=123594), KCNH5(dist=443006)        | intergenic     |
| 8  | 38842963  | C | T | rs78165883              | 9.78E-01 | 0.074 | 0.079 | 0.93 | 0.74 | -1.18 | 1.37E-06 | 0.111 | 0.069 | 1.70 | 1.4  | -2.07 | 1.34 | 4.85E-04 | HTRA4                                             | intronic       |
| 6  | 14765162  | C | T | rs731187                | 1.93E-06 | 0.359 | 0.407 | 0.82 | 0.72 | -0.93 | 6.43E-01 | 0.392 | 0.420 | 0.89 | 0.79 | -1    | 0.84 | 4.86E-04 | LINC01108(dist=479477), JARID2(dist=481044)       | intergenic     |
| 21 | 34020653  | A | G | rs10470165              | 1.23E-05 | 0.111 | 0.158 | 0.66 | 0.55 | -0.8  | 5.42E-01 | 0.131 | 0.134 | 0.97 | 0.82 | -1.16 | 0.79 | 4.87E-04 | SYNJ1                                             | intronic       |
| 4  | 58238701  | G | A | rs73818823              | 4.10E-01 | 0.034 | 0.031 | 1.10 | 0.78 | -1.57 | 3.27E-05 | 0.043 | 0.023 | 1.96 | 1.43 | -2.67 | 1.61 | 4.88E-04 | IGFBP7-AS1(dist=167236), LOC101928851(dist=53337) | intergenic     |
| 15 | 58649668  | C | G | rs8036597               | 4.63E-06 | 0.258 | 0.319 | 0.74 | 0.65 | -0.85 | 8.24E-01 | 0.326 | 0.329 | 0.99 | 0.87 | -1.12 | 0.84 | 4.89E-04 | AQP9(dist=171558), LIPC(dist=74507)               | intergenic     |
| 19 | 58332557  | T | C | rs34270875;rs74181730   | 4.61E-01 | 0.138 | 0.132 | 1.05 | 0.88 | -1.26 | 2.35E-05 | 0.162 | 0.124 | 1.36 | 1.15 | -1.6  | 1.28 | 4.90E-04 | ZNF552(dist=6276), FKBP1AP1(dist=4110)            | intergenic     |
| 14 | 62732171  | C | T | rs11158387;rs34956369   | 5.49E-01 | 0.396 | 0.397 | 1.00 | 0.88 | -1.14 | 1.67E-05 | 0.429 | 0.362 | 0.76 | 0.67 | -0.85 | 0.85 | 4.92E-04 | LINC00644(dist=125480), KCNH5(dist=441120)        | intergenic     |
| 4  | 6689813   | C | A | rs186077078             | 6.18E-05 | 0.054 | 0.074 | 0.72 | 0.55 | -0.93 | 3.69E-01 | 0.068 | 0.078 | 0.86 | 0.68 | -1.08 | 0.68 | 4.92E-04 | LOC93622(dist=12039), S100P(dist=5753)            | intergenic     |
| 8  | 38851738  | C | G | rs73674681              | 9.80E-01 | 0.074 | 0.079 | 0.93 | 0.73 | -1.17 | 1.62E-06 | 0.112 | 0.069 | 1.71 | 1.41 | -2.08 | 1.34 | 4.94E-04 | TM2D2                                             | intronic       |
| 21 | 33996278  | T | C | rs845011                | 4.91E-05 | 0.123 | 0.168 | 0.69 | 0.58 | -0.83 | 3.69E-01 | 0.134 | 0.138 | 0.96 | 0.81 | -1.14 | 0.79 | 4.94E-04 | C21orf59(dist=11360), SYNJ1(dist=4791)            | intergenic     |
| 1  | 1053670   | G | A | rs4970410               | 3.49E-01 | 0.456 | 0.458 | 0.99 | 0.88 | -1.12 | 3.85E-05 | 0.470 | 0.399 | 1.34 | 1.19 | -1.5  | 1.18 | 4.95E-04 | C1orf159(dist=1934), LINC01342(dist=18727)        | intergenic     |
| 21 | 34006917  | T | G | rs844985                | 1.46E-05 | 0.111 | 0.158 | 0.67 | 0.55 | -0.81 | 5.19E-01 | 0.134 | 0.137 | 0.97 | 0.82 | -1.16 | 0.79 | 4.96E-04 | SYNJ1                                             | intronic       |
| 2  | 140212737 | T | A | rs72882021              | 4.00E-01 | 0.479 | 0.482 | 1.01 | 0.9  | -1.15 | 2.43E-05 | 0.539 | 0.472 | 1.31 | 1.16 | -1.47 | 1.17 | 5.00E-04 | YY1P2(dist=555993), LRP1B(dist=776259)            | intergenic     |
| 8  | 38865252  | A | G | rs73674685              | 9.73E-01 | 0.074 | 0.079 | 0.92 | 0.73 | -1.17 | 1.19E-06 | 0.114 | 0.070 | 1.69 | 1.4  | -2.06 | 1.34 | 5.00E-04 | ADAM9                                             | intronic       |
| 14 | 62723926  | T | G | rs1533334               | 5.73E-01 | 0.333 | 0.334 | 1.00 | 0.88 | -1.14 | 1.38E-05 | 0.368 | 0.305 | 0.75 | 0.67 | -0.85 | 0.84 | 5.05E-04 | LINC00644(dist=117235), KCNH5(dist=449365)        | intergenic     |
| 8  | 38843833  | C | T | rs74560706              | 9.87E-01 | 0.074 | 0.079 | 0.93 | 0.73 | -1.17 | 1.42E-06 | 0.111 | 0.069 | 1.70 | 1.4  | -2.07 | 1.34 | 5.06E-04 | HTRA4                                             | intronic       |
| 7  | 38046849  | T | C | rs1524050               | 4.54E-01 | 0.235 | 0.224 | 1.06 | 0.92 | -1.23 | 2.37E-05 | 0.274 | 0.223 | 1.32 | 1.15 | -1.51 | 1.21 | 5.06E-04 | EPDR1(dist=55307), STARD3NL(dist=170959)          | intergenic     |
| 16 | 58998739  | C | G | rs144298169             | 3.78E-01 | 0.075 | 0.070 | 1.08 | 0.85 | -1.37 | 3.32E-05 | 0.096 | 0.065 | 1.53 | 1.25 | -1.88 | 1.38 | 5.08E-04 | GOT2(dist=230478), APOOP5(dist=789306)            | intergenic     |
| 2  | 229296609 | C | A | rs73995283              | 2.79E-01 | 0.098 | 0.093 | 1.06 | 0.86 | -1.3  | 2.56E-05 | 0.105 | 0.072 | 1.52 | 1.24 | -1.85 | 1.35 | 5.09E-04 | SPHKAP(dist=250248), PID1(dist=592080)            | intergenic     |
| 8  | 61436559  | C | T | rs55825491              | 5.58E-05 | 0.327 | 0.385 | 0.77 | 0.68 | -0.88 | 2.76E-01 | 0.362 | 0.378 | 0.93 | 0.83 | -1.05 | 0.85 | 5.11E-04 | RAB2A                                             | intronic       |
| 8  | 38862309  | G | A | rs141553305             | 9.64E-01 | 0.074 | 0.079 | 0.92 | 0.73 | -1.16 | 1.20E-06 | 0.114 | 0.070 | 1.70 | 1.4  | -2.06 | 1.34 | 5.18E-04 | ADAM9                                             | intronic       |
| 8  | 38861549  | A | G | rs73674684              | 9.63E-01 | 0.074 | 0.079 | 0.92 | 0.73 | -1.16 | 1.20E-06 | 0.114 | 0.070 | 1.70 | 1.4  | -2.06 | 1.34 | 5.20E-04 | ADAM9                                             | intronic       |
| 21 | 34020913  | C | T | rs864603                | 1.35E-05 | 0.108 | 0.155 | 0.66 | 0.55 | -0.8  | 5.45E-01 | 0.132 | 0.135 | 0.97 | 0.82 | -1.16 | 0.79 | 5.20E-04 | SYNJ1                                             | intronic       |
| 3  | 143081155 | C | G | rs140013969             | 4.91E-01 | 0.056 | 0.054 | 1.04 | 0.79 | -1.36 | 1.14E-05 | 0.068 | 0.043 | 1.62 | 1.27 | -2.07 | 1.45 | 5.21E-04 | SLC9A9                                            | intronic       |
| 1  | 159081595 | A | C | rs1333243               | 5.56E-01 | 0.379 | 0.356 | 1.10 | 0.97 | -1.25 | 6.94E-06 | 0.437 | 0.402 | 1.15 | 1.03 | -1.3  | 1.22 | 5.23E-04 | AIM2(dist=34948), CADM3(dist=59782)               | intergenic     |
| 3  | 143080794 | G | A | rs78986929              | 4.91E-01 | 0.056 | 0.054 | 1.04 | 0.79 | -1.36 | 1.15E-05 | 0.068 | 0.043 | 1.62 | 1.27 | -2.07 | 1.45 | 5.24E-04 | SLC9A9                                            | intronic       |
| 3  | 64013249  | T | C | rs35837                 | 9.81E-01 | 0.266 | 0.262 | 0.97 | 0.84 | -1.12 | 1.26E-06 | 0.295 | 0.234 | 1.37 | 1.2  | -1.56 | 1.20 | 5.25E-04 | PSMD6(dist=3563), PRICKLE2-AS1(dist=40391)        | intergenic     |
| 8  | 38855782  | G | C | rs73674683              | 9.97E-01 | 0.074 | 0.080 | 0.93 | 0.73 | -1.17 | 1.56E-06 | 0.113 | 0.070 | 1.70 | 1.4  | -2.06 | 1.34 | 5.29E-04 | ADAM9                                             | intronic       |
| 5  | 79475960  | A | G | rs6888370               | 2.43E-05 | 0.040 | 0.022 | 1.83 | 1.28 | -2.61 | 4.83E-01 | 0.031 | 0.027 | 1.14 | 0.81 | -1.6  | 1.68 | 5.31E-04 | SERINC5                                           | intronic       |
| 13 | 49073302  | T | A | rs568053175;rs113926349 | 4.70E-01 | 0.086 | 0.083 | 1.04 | 0.83 | -1.3  | 3.21E-05 | 0.117 | 0.078 | 1.58 | 1.31 | -1.91 | 1.33 | 5.31E-04 | RCBTB2                                            | intronic       |
| 2  | 140218663 | A | G | rs1431873               | 4.17E-01 | 0.480 | 0.483 | 1.01 | 0.89 | -1.15 | 2.40E-05 | 0.537 | 0.470 | 1.31 | 1.16 | -1.47 | 1.17 | 5.35E-04 | YY1P2(dist=561919), LRP1B(dist=770333)            | intergenic     |
| 16 | 58989278  | C | T | rs16960668              | 4.12E-01 | 0.065 | 0.060 | 1.09 | 0.84 | -1.4  | 3.68E-05 | 0.087 | 0.057 | 1.58 | 1.27 | -1.96 | 1.40 | 5.41E-04 | GOT2(dist=221017), APOOP5(dist=798767)            | intergenic     |
| 1  | 172930986 | T | G | rs139863264             | 3.41E-01 | 0.036 | 0.032 | 1.13 | 0.81 | -1.59 | 2.44E-05 | 0.042 | 0.022 | 1.93 | 1.41 | -2.64 | 1.63 | 5.45E-04 | FASLG(dist=294974), TNFSF18(dist=79374)           | intergenic     |
| 8  | 61445098  | C | T | rs13276831              | 6.25E-05 | 0.326 | 0.385 | 0.78 | 0.68 | -0.88 | 2.76E-01 | 0.362 | 0.378 | 0.93 | 0.83 | -1.05 | 0.85 | 5.45E-04 | RAB2A                                             | intronic       |
| 14 | 62760987  | A | G | rs66617333              | 4.80E-01 | 0.402 | 0.393 | 1.04 | 0.91 | -1.18 | 4.35E-05 | 0.433 | 0.369 | 1.31 | 1.16 | -1.47 | 1.17 | 5.46E-04 | LINC00644(dist=154296), KCNH5(dist=412304)        | intergenic     |
| 14 | 26615874  | G | C | rs143815414             | 9.36E-01 | 0.026 | 0.021 | 1.25 | 0.84 | -1.88 | 7.44E-06 | 0.055 | 0.038 | 1.47 | 1.13 | -1.92 | 1.63 | 5.48E-04 | STXBP6(dist=1096371), NOVA1(dist=299215)          | intergenic     |
| 8  | 38860177  | C | A | rs61456957              | 9.52E-01 | 0.081 | 0.085 | 0.94 | 0.75 | -1.18 | 1.99E-06 | 0.118 | 0.074 | 1.66 | 1.37 | -2.01 | 1.33 | 5.48E-04 | ADAM9                                             | intronic       |
| 8  | 61447483  | T | A | rs6987084               | 6.27E-05 | 0.326 | 0.384 | 0.78 | 0.68 | -0.88 | 2.76E-01 | 0.362 | 0.378 | 0.93 | 0.83 | -1.05 | 0.85 | 5.49E-04 | RAB2A                                             | intronic       |
| 2  | 46188304  | C | G | rs6728293               | 6.93E-07 | 0.051 | 0.027 | 1.97 | 1.43 | -2.71 | 6.09E-01 | 0.028 | 0.028 | 0.99 | 0.7  | -1.42 | 1.72 | 5.50E-04 | PRKCE                                             | intronic       |
| 2  | 224825748 | A | G | rs73992135              | 1.03E-06 | 0.052 | 0.026 | 2.04 | 1.48 | -2.8  | 6.91E-01 | 0.027 | 0.028 | 0.98 | 0.69 | -1.41 | 1.65 | 5.50E-04 | MRPL44                                            | intronic       |
| 7  | 20533256  | T | C | rs60579795              | 9.19E-06 | 0.189 | 0.254 | 0.69 | 0.59 | -0.8  | 5.39E-01 | 0.230 | 0.232 | 0.99 | 0.86 | -1.14 | 0.83 | 5.51E-04 | ITGB8(dist=77874), ABCB5(dist=121989)             | intergenic     |
| 1  | 172931047 | T | C | rs151131671             | 3.40E-01 | 0.036 | 0.032 | 1.13 | 0.81 | -1.59 | 2.51E-05 | 0.042 | 0.022 | 1.93 | 1.41 | -2.64 | 1.63 | 5.51E-04 | FASLG(dist=295035), TNFSF18(dist=79313)           | intergenic     |
| 12 | 54523901  | C | G | rs56242321              | 7.81E-01 | 0.171 | 0.166 | 1.04 | 0.88 | -1.23 | 6.76E-06 | 0.231 | 0.189 | 1.29 | 1.12 | -1.49 | 1.25 | 5.53E-04 | LOC400043                                         | ncRNA_intronic |
| 3  | 143074864 | A | G | rs115851154             | 4.93E-01 | 0.056 | 0.054 | 1.04 | 0.79 | -1.36 | 1.27E-05 | 0.068 | 0.043 | 1.62 | 1.27 | -2.07 | 1.45 | 5.56E-04 | SLC9A9                                            | intronic       |
| 16 | 86575100  | C | A | rs9674143               | 4.09E-01 | 0.369 | 0.360 | 1.04 | 0.92 | -1.18 | 2.94E-05 | 0.387 | 0.327 | 1.30 | 1.15 | -1.47 | 1.19 | 5.60E-04 | MTHFSD                                            | intronic       |
| 1  | 1054076   | C | T | rs1105065               | 3.56E-01 | 0.452 | 0.454 | 0.99 | 0.87 | -1.12 | 4.37E-05 | 0.466 | 0.396 | 1.33 | 1.18 | -1.5  | 1.18 | 5.61E-04 | C1orf159(dist=2340), LINC01342(dist=18321)        | intergenic     |
| 14 | 85335473  | A | T | rs74069804              | 5.69E-05 | 0.089 | 0.062 | 1.47 | 1.17 | -1.85 | 3.51E-01 | 0.062 | 0.054 | 1.16 | 0.91 | -1.48 | 1.40 | 5.65E-04 | NONE(dist=NONE), LINC00911(dist=524750)           | intergenic     |
| 8  | 38850040  |   |   |                         |          |       |       |      |      |       |          |       |       |      |      |       |      |          |                                                   |                |

|    |           |   |   |                      |          |       |       |      |             |          |       |       |      |             |      |          |                                                  |                |
|----|-----------|---|---|----------------------|----------|-------|-------|------|-------------|----------|-------|-------|------|-------------|------|----------|--------------------------------------------------|----------------|
| 3  | 64021693  | A | C | rs831556             | 8.63E-01 | 0.209 | 0.213 | 1.03 | 0.88 - 1.19 | 6.07E-07 | 0.251 | 0.194 | 0.72 | 0.63 - 0.83 | 0.83 | 5.76E-04 | PSMD6(dist=12007), PRICKLE2-AS1(dist=31947)      | intergenic     |
| 13 | 109501687 | T | C | rs9587709            | 5.92E-05 | 0.396 | 0.339 | 0.78 | 0.69 - 0.89 | 5.64E-01 | 0.358 | 0.351 | 0.97 | 0.86 - 1.1  | 0.82 | 5.79E-04 | MYO16                                            | intronic       |
| 19 | 50305688  | G | C | rs2159984            | 7.78E-01 | 0.399 | 0.392 | 1.03 | 0.91 - 1.17 | 5.70E-06 | 0.431 | 0.373 | 1.28 | 1.13 - 1.44 | 1.18 | 5.84E-04 | AP2A1                                            | intronic       |
| 7  | 89772999  | G | T | rs39271              | 4.75E-05 | 0.290 | 0.237 | 0.76 | 0.66 - 0.87 | 3.60E-01 | 0.256 | 0.244 | 0.94 | 0.82 - 1.07 | 0.83 | 5.86E-04 | STEAP2-AS1                                       | ncRNA_intronic |
| 19 | 50300026  | A | G | rs28413128           | 6.47E-01 | 0.406 | 0.396 | 1.04 | 0.92 - 1.18 | 1.62E-05 | 0.438 | 0.382 | 1.26 | 1.12 - 1.42 | 1.18 | 5.90E-04 | AP2A1                                            | intronic       |
| 5  | 92134273  | G | A | rs27540              | 3.01E-05 | 0.334 | 0.395 | 1.31 | 1.15 - 1.49 | 5.18E-01 | 0.343 | 0.358 | 1.07 | 0.94 - 1.21 | 1.19 | 5.90E-04 | ARRDC3-AS1(dist=1417741), NR2F1-AS1(dist=610789) | intergenic     |
| 19 | 55895539  | C | A | rs189206666          | 3.40E-01 | 0.037 | 0.034 | 1.10 | 0.79 - 1.54 | 3.18E-05 | 0.038 | 0.023 | 1.67 | 1.21 - 2.31 | 1.84 | 5.93E-04 | TMEM238                                          | exonic         |
| 6  | 91352362  | C | T | rs1923069            | 4.33E-05 | 0.156 | 0.113 | 1.45 | 1.21 - 1.74 | 3.84E-01 | 0.133 | 0.125 | 1.08 | 0.9 - 1.28  | 1.27 | 5.95E-04 | MAP3K7(dist=55342), MIR4643(dist=879016)         | intergenic     |
| 2  | 234944462 | C | T | rs75545694           | 4.62E-05 | 0.194 | 0.152 | 1.33 | 1.13 - 1.57 | 3.33E-01 | 0.175 | 0.160 | 1.12 | 0.96 - 1.31 | 1.25 | 5.96E-04 | TRPM8(dist=16296), SPP2(dist=14884)              | intergenic     |
| 13 | 48913376  | C | T | rs146038562          | 3.78E-01 | 0.040 | 0.036 | 1.11 | 0.81 - 1.53 | 5.59E-05 | 0.051 | 0.028 | 1.87 | 1.41 - 2.49 | 1.54 | 5.97E-04 | RB1                                              | intronic       |
| 7  | 20539369  | A | C | rs7782347            | 5.01E-05 | 0.199 | 0.257 | 0.72 | 0.62 - 0.83 | 3.42E-01 | 0.232 | 0.239 | 0.96 | 0.84 - 1.1  | 0.83 | 6.00E-04 | ITGB8(dist=83987), ABCB5(dist=115876)            | intergenic     |
| 7  | 20543058  | T | C | rs7781887            | 5.01E-05 | 0.200 | 0.259 | 0.72 | 0.62 - 0.83 | 3.48E-01 | 0.237 | 0.244 | 0.97 | 0.84 - 1.11 | 0.83 | 6.03E-04 | ITGB8(dist=87676), ABCB5(dist=112187)            | intergenic     |
| 14 | 62757274  | T | C | rs17099663           | 4.88E-01 | 0.402 | 0.393 | 1.04 | 0.91 - 1.18 | 4.85E-05 | 0.433 | 0.369 | 1.31 | 1.16 - 1.47 | 1.17 | 6.11E-04 | LINC00644(dist=150583), KCNH5(dist=416017)       | intergenic     |
| 10 | 45596078  | G | A | rs143586987          | 4.81E-01 | 0.031 | 0.030 | 1.02 | 0.71 - 1.46 | 4.81E-05 | 0.044 | 0.024 | 1.90 | 1.4 - 2.59  | 1.65 | 6.12E-04 | RSU1P2                                           | ncRNA_intronic |
| 4  | 63154579  | G | A | rs73215517           | 1.26E-05 | 0.077 | 0.046 | 1.74 | 1.35 - 2.24 | 6.51E-01 | 0.057 | 0.056 | 1.03 | 0.8 - 1.32  | 1.44 | 6.12E-04 | ADGRL3-AS1(dist=127096), TECRL(dist=1989598)     | intergenic     |
| 6  | 91351122  | C | T | rs77649585           | 4.87E-05 | 0.154 | 0.112 | 1.45 | 1.21 - 1.73 | 3.80E-01 | 0.130 | 0.122 | 1.08 | 0.9 - 1.28  | 1.27 | 6.13E-04 | MAP3K7(dist=54102), MIR4643(dist=880256)         | intergenic     |
| 6  | 91350345  | A | G | rs75286924           | 4.87E-05 | 0.154 | 0.112 | 1.45 | 1.21 - 1.73 | 3.81E-01 | 0.130 | 0.122 | 1.08 | 0.9 - 1.28  | 1.27 | 6.15E-04 | MAP3K7(dist=53325), MIR4643(dist=881033)         | intergenic     |
| 3  | 64030872  | A | G | rs6445389            | 7.64E-01 | 0.259 | 0.258 | 1.00 | 0.87 - 1.15 | 7.03E-06 | 0.298 | 0.246 | 0.77 | 0.68 - 0.88 | 0.83 | 6.16E-04 | PSMD6(dist=21186), PRICKLE2-AS1(dist=22768)      | intergenic     |
| 3  | 57042956  | T | A | rs75108591           | 5.03E-06 | 0.069 | 0.044 | 1.61 | 1.24 - 2.1  | 7.84E-01 | 0.047 | 0.043 | 1.09 | 0.83 - 1.45 | 1.47 | 6.23E-04 | ARHGEF3                                          | intronic       |
| 14 | 26602893  | C | A | rs72665066           | 8.88E-01 | 0.027 | 0.022 | 1.22 | 0.83 - 1.82 | 4.58E-06 | 0.054 | 0.037 | 1.49 | 1.14 - 1.95 | 1.63 | 6.23E-04 | STXBP6(dist=1083390), NOVA1(dist=312196)         | intergenic     |
| 19 | 50304392  | T | C | rs10421561           | 8.68E-01 | 0.403 | 0.396 | 1.03 | 0.9 - 1.16  | 3.82E-06 | 0.436 | 0.376 | 1.28 | 1.14 - 1.44 | 1.17 | 6.24E-04 | AP2A1                                            | intronic       |
| 7  | 109536987 | G | A | rs116050415          | 4.48E-05 | 0.088 | 0.133 | 0.63 | 0.51 - 0.77 | 4.84E-01 | 0.121 | 0.121 | 0.99 | 0.83 - 1.19 | 0.77 | 6.25E-04 | C7orf66(dist=1012343), EIF3IP1(dist=62297)       | intergenic     |
| 19 | 50299408  | T | G | rs2072451            | 5.12E-01 | 0.493 | 0.484 | 1.04 | 0.92 - 1.18 | 3.30E-05 | 0.519 | 0.465 | 1.24 | 1.1 - 1.39  | 1.18 | 6.26E-04 | AP2A1                                            | intronic       |
| 10 | 51782758  | A | G | rs4935373            | 9.11E-06 | 0.227 | 0.166 | 1.48 | 1.27 - 1.72 | 3.70E-01 | 0.213 | 0.216 | 0.98 | 0.85 - 1.13 | 1.34 | 6.28E-04 | FAM21EP                                          | ncRNA_intronic |
| 16 | 20193957  | C | T | rs57759319           | 6.64E-06 | 0.103 | 0.058 | 1.84 | 1.47 - 2.31 | 5.44E-01 | 0.101 | 0.106 | 0.94 | 0.78 - 1.15 | 1.43 | 6.31E-04 | GPR139(dist=108857), GP2(dist=126939)            | intergenic     |
| 20 | 3452041   | C | T | rs75653676           | 2.81E-01 | 0.094 | 0.089 | 1.05 | 0.85 - 1.3  | 4.77E-05 | 0.092 | 0.061 | 1.54 | 1.25 - 1.91 | 1.36 | 6.32E-04 | ATRN                                             | exonic         |
| 11 | 102671839 | C | T | rs116002430          | 7.16E-01 | 0.028 | 0.027 | 1.04 | 0.71 - 1.52 | 1.01E-05 | 0.045 | 0.023 | 1.98 | 1.46 - 2.69 | 1.65 | 6.36E-04 | WTAPP1                                           | ncRNA_intronic |
| 21 | 34045065  | C | T | rs845025             | 1.11E-05 | 0.109 | 0.156 | 0.66 | 0.54 - 0.8  | 6.15E-01 | 0.135 | 0.137 | 0.98 | 0.83 - 1.17 | 0.79 | 6.43E-04 | SYNJ1                                            | intronic       |
| 7  | 45938720  | A | T | rs2471550            | 3.05E-05 | 0.056 | 0.075 | 1.35 | 1.05 - 1.75 | 3.02E-01 | 0.082 | 0.095 | 1.18 | 0.95 - 1.45 | 1.42 | 6.43E-04 | IGFBP1(dist=5453), IGFBP3(dist=13124)            | intergenic     |
| 2  | 80296234  | T | G | rs35417553;rs6723538 | 7.18E-01 | 0.072 | 0.063 | 0.87 | 0.68 - 1.12 | 2.98E-06 | 0.083 | 0.061 | 0.73 | 0.58 - 0.9  | 0.68 | 6.48E-04 | CTNNA2                                           | intronic       |
| 5  | 92138100  | T | G | rs2431367            | 3.90E-05 | 0.335 | 0.396 | 1.30 | 1.14 - 1.48 | 5.14E-01 | 0.339 | 0.355 | 1.07 | 0.94 - 1.21 | 1.18 | 6.49E-04 | ARRDC3-AS1(dist=1421568), NR2F1-AS1(dist=606962) | intergenic     |
| 3  | 57043907  | A | G | rs9822979            | 5.19E-06 | 0.069 | 0.044 | 1.61 | 1.24 - 2.1  | 7.89E-01 | 0.047 | 0.043 | 1.09 | 0.83 - 1.44 | 1.47 | 6.52E-04 | ARHGEF3                                          | intronic       |
| 3  | 59866449  | C | T | rs17061320           | 5.03E-05 | 0.256 | 0.217 | 1.24 | 1.07 - 1.43 | 5.32E-01 | 0.233 | 0.219 | 1.08 | 0.94 - 1.24 | 1.21 | 6.53E-04 | FHIT                                             | intronic       |
| 5  | 17956990  | G | T | rs13182757           | 3.15E-05 | 0.112 | 0.149 | 0.72 | 0.6 - 0.87  | 3.95E-01 | 0.159 | 0.181 | 0.86 | 0.73 - 1.01 | 0.80 | 6.53E-04 | LOC401177(dist=569571), CDH18(dist=1516165)      | intergenic     |
| 7  | 3740265   | G | A | rs7793480            | 3.71E-01 | 0.267 | 0.265 | 1.01 | 0.88 - 1.16 | 6.33E-05 | 0.288 | 0.229 | 1.36 | 1.19 - 1.55 | 1.21 | 6.54E-04 | SDK1                                             | intronic       |
| 3  | 64048297  | T | C | rs831571             | 7.68E-01 | 0.200 | 0.207 | 1.04 | 0.89 - 1.22 | 3.54E-07 | 0.247 | 0.190 | 0.72 | 0.62 - 0.82 | 0.82 | 6.65E-04 | PSMD6(dist=38611), PRICKLE2-AS1(dist=5343)       | intergenic     |
| 12 | 11449628  | A | T | rs12422896           | 1.60E-05 | 0.083 | 0.050 | 1.72 | 1.34 - 2.19 | 4.60E-01 | 0.068 | 0.067 | 1.03 | 0.81 - 1.3  | 1.38 | 6.67E-04 | PRB3(dist=26987), PRB4(dist=10387)               | intergenic     |
| 8  | 38834697  | C | T | rs111657881          | 9.47E-01 | 0.072 | 0.077 | 0.94 | 0.74 - 1.19 | 2.53E-06 | 0.108 | 0.067 | 1.68 | 1.38 - 2.05 | 1.34 | 6.71E-04 | HTRA4                                            | intronic       |
| 11 | 102691974 | A | G | rs116537119          | 4.04E-01 | 0.029 | 0.026 | 1.12 | 0.77 - 1.63 | 5.22E-05 | 0.042 | 0.022 | 1.96 | 1.43 - 2.69 | 1.62 | 6.71E-04 | WTAPP1                                           | ncRNA_intronic |
| 12 | 11438475  | C | A | rs56101186           | 1.65E-05 | 0.083 | 0.050 | 1.72 | 1.34 - 2.2  | 4.64E-01 | 0.068 | 0.066 | 1.03 | 0.81 - 1.3  | 1.38 | 6.72E-04 | PRB3(dist=15834), PRB4(dist=21540)               | intergenic     |
| 11 | 5434202   | G | A | rs10734512           | 4.87E-01 | 0.389 | 0.393 | 1.02 | 0.9 - 1.15  | 3.40E-05 | 0.443 | 0.378 | 0.76 | 0.68 - 0.86 | 0.84 | 6.73E-04 | OR51B5                                           | intronic       |
| 11 | 102693115 | C | T | rs114933012          | 4.04E-01 | 0.029 | 0.026 | 1.12 | 0.77 - 1.63 | 5.27E-05 | 0.042 | 0.022 | 1.96 | 1.43 - 2.69 | 1.62 | 6.74E-04 | WTAPP1                                           | ncRNA_intronic |
| 5  | 117742409 | C | T | rs116003810          | 9.63E-01 | 0.059 | 0.063 | 0.94 | 0.73 - 1.22 | 1.10E-06 | 0.087 | 0.050 | 1.80 | 1.44 - 2.24 | 1.40 | 6.75E-04 | LINC01927280                                     | ncRNA_intronic |
| 6  | 5379236   | T | C | rs60194155           | 5.04E-01 | 0.028 | 0.027 | 1.06 | 0.73 - 1.55 | 2.07E-05 | 0.042 | 0.022 | 1.99 | 1.45 - 2.72 | 1.65 | 6.78E-04 | FARS2                                            | intronic       |
| 5  | 92138167  | A | A | rs2435070            | 3.84E-05 | 0.335 | 0.396 | 1.30 | 1.14 - 1.48 | 5.26E-01 | 0.340 | 0.355 | 1.07 | 0.94 - 1.21 | 1.18 | 6.79E-04 | ARRDC3-AS1(dist=1421635), NR2F1-AS1(dist=606895) | intergenic     |
| 8  | 38835465  | C | T | rs55736573           | 9.58E-01 | 0.072 | 0.077 | 0.93 | 0.74 - 1.19 | 2.50E-06 | 0.108 | 0.067 | 1.68 | 1.38 - 2.05 | 1.34 | 6.85E-04 | HTRA4                                            | intronic       |
| 4  | 16318367  | G | A | rs76607004           | 5.29E-01 | 0.037 | 0.036 | 1.03 | 0.74 - 1.42 | 1.71E-05 | 0.045 | 0.027 | 1.71 | 1.27 - 2.31 | 1.70 | 6.86E-04 | FSTL5(dist=98491), MIR4454(dist=831049)          | intergenic     |
| 6  | 29404393  | A | G | rs11175272           | 5.16E-01 | 0.117 | 0.113 | 1.04 | 0.86 - 1.26 | 2.42E-05 | 0.143 | 0.098 | 1.54 | 1.29 - 1.83 | 1.28 | 6.88E-04 | OR11A1(dist=8884), OR10C1(dist=3323)             | intergenic     |
| 8  | 66528700  | C | T | rs146107538          | 5.82E-01 | 0.087 | 0.081 | 1.09 | 0.87 - 1.36 | 2.19E-05 | 0.108 | 0.080 | 1.40 | 1.15 - 1.7  | 1.35 | 6.89E-04 | ARMC1                                            | intronic       |
| 2  | 224794396 | T | C | rs73992110           | 1.09E-06 | 0.049 | 0.023 | 2.17 | 1.56 - 3.03 | 7.05E-01 | 0.028 | 0.028 | 0.99 | 0.7 - 1.41  | 1.63 | 6.91E-04 | WDFY1                                            | intronic       |
| 6  | 91356577  | T | A | rs62409079           | 5.08E-05 | 0.154 | 0.112 | 1.45 | 1.21 - 1.73 | 4.01E-01 | 0.130 | 0.122 | 1.07 | 0.9 - 1.28  | 1.27 | 6.92E-04 | MAP3K7(dist=59557), MIR4643(dist=874801)         | intergenic     |
| 11 | 102701129 | A | G | rs17099629           | 4.03E-01 | 0.029 | 0.026 | 1.12 | 0.77 - 1.63 | 5.62E-05 | 0.042 | 0.022 | 1.96 | 1.43 - 2.68 | 1.62 | 6.97E-04 | WTAPP1                                           | ncRNA_intronic |
| 3  | 143062266 | A | G | rs75353832           | 4.63E-01 | 0.045 | 0.042 | 1.08 | 0.79 - 1.46 | 1.53E-05 | 0.055 | 0.033 | 1.68 | 1.28 - 2.21 | 1.50 | 7.07E-04 | SLC9A9-AS1                                       | ncRNA_exonic   |
| 8  | 38848808  | C | T | rs58771784           | 9.04E-01 | 0.075 | 0.081 | 0.91 | 0.72 - 1.15 | 1.63E-06 | 0.112 | 0.069 | 1.70 | 1.4 - 2.07  | 1.33 | 7.13E-04 | TM2D2                                            | UTR3           |
| 2  | 18477913  | G | A | rs184791559          | 3.09E-01 | 0.125 | 0.120 | 1.05 | 0.87 - 1.27 | 4.61E-05 | 0.137 | 0.101 | 1.41 | 1.18 - 1.68 | 1.32 | 7.18E-04 | KCNS3(dist=363688), RDH14(dist=258076)           | intergenic     |
| 5  | 27269149  | A | G | rs6861471            | 1.72E-05 | 0.043 | 0.073 | 0.58 | 0.44 - 0.77 | 6.56E-01 | 0.066 | 0.073 | 0.90 | 0.71 - 1.14 | 0.73 | 7.19E-04 | CDH9(dist=230460), LINC01021(dist=203250)        | intergenic     |
| 6  | 23628611  | G | T | rs9379526            | 5.04E-01 | 0.159 | 0.162 | 0.98 | 0.83 - 1.16 | 2.45E-05 | 0.121 | 0.174 | 0.66 | 0.55 - 0.78 | 0.81 | 7.22E-04 | HDGFL1(dist=1057861), NRSN1(dist=497803)         | intergenic     |
| 10 | 32398895  | T | C | rs211424             | 4.56E-05 | 0.341 | 0.417 | 1.38 | 1.21 - 1.57 | 2.56E-01 | 0.348 | 0.356 | 1.04 | 0.92 - 1.17 | 1.18 | 7.30E-04 | KIF5B(dist=53524), EPC1(dist=157749)             | intergenic     |
| 1  | 147220045 | C | A | rs12032789           | 1.46E-05 | 0.080 | 0.044 | 1.89 | 1.46 - 2.43 | 4.82E-01 | 0.068 | 0.071 | 0.95 | 0.75 -      |      |          |                                                  |                |

|    |           |   |   |                      |          |       |         |      |      |       |          |       |       |      |      |       |      |          |                                                  |                |
|----|-----------|---|---|----------------------|----------|-------|---------|------|------|-------|----------|-------|-------|------|------|-------|------|----------|--------------------------------------------------|----------------|
| 7  | 109530457 | G | A | rs115271671          | 4.11E-05 | 0.086 | 0.132   | 0.62 | 0.5  | -0.76 | 5.66E-01 | 0.120 | 0.119 | 1.00 | 0.84 | -1.2  | 0.77 | 7.58E-04 | C7orf66(dist=1005813), EIF3IP1(dist=68827)       | intergenic     |
| 2  | 176946509 | C | A | rs76494921           | 3.17E-01 | 0.034 | 0.029   | 1.16 | 0.81 | -1.64 | 5.96E-05 | 0.042 | 0.024 | 1.80 | 1.32 | -2.47 | 1.64 | 7.59E-04 | EVX2                                             | intronic       |
| 7  | 109533203 | T | A | rs111669284          | 5.16E-05 | 0.088 | 0.134   | 0.62 | 0.51 | -0.77 | 5.21E-01 | 0.123 | 0.123 | 1.00 | 0.84 | -1.19 | 0.77 | 7.67E-04 | C7orf66(dist=1008559), EIF3IP1(dist=66081)       | intergenic     |
| 14 | 62793548  | T | G | rs144499411          | 5.75E-01 | 0.378 | 0.376   | 0.99 | 0.87 | -1.13 | 2.86E-05 | 0.409 | 0.346 | 0.76 | 0.68 | -0.86 | 0.85 | 7.68E-04 | LINC00644(dist=186857), KCNH5(dist=379743)       | intergenic     |
| 9  | 121710501 | T | C | rs7850526            | 2.76E-05 | 0.175 | 0.138   | 1.33 | 1.12 | -1.57 | 4.46E-01 | 0.136 | 0.121 | 1.14 | 0.96 | -1.36 | 1.27 | 7.73E-04 | TLR4(dist=1230732), BRINP1(dist=218407)          | intergenic     |
| 2  | 103091540 | A | G | rs17027258           | 4.58E-01 | 0.172 | 0.175   | 0.98 | 0.83 | -1.15 | 4.48E-05 | 0.151 | 0.199 | 0.72 | 0.61 | -0.84 | 0.82 | 7.75E-04 | SLC9A4                                           | intronic       |
| 21 | 34096806  | A | G | rs859789             | 1.34E-05 | 0.107 | 0.154   | 0.66 | 0.55 | -0.8  | 6.30E-01 | 0.135 | 0.137 | 0.99 | 0.83 | -1.17 | 0.80 | 7.77E-04 | SYNJ1                                            | intronic       |
| 11 | 102710257 | A | G | rs3025068            | 4.34E-01 | 0.029 | 0.026   | 1.11 | 0.76 | -1.63 | 5.47E-05 | 0.042 | 0.022 | 1.95 | 1.43 | -2.67 | 1.62 | 7.77E-04 | MMP3                                             | intronic       |
| 8  | 14698861  | A | G | rs116445328          | 3.84E-05 | 0.059 | 0.038   | 1.60 | 1.21 | -2.13 | 4.48E-01 | 0.041 | 0.038 | 1.09 | 0.81 | -1.47 | 1.58 | 7.83E-04 | SGCZ                                             | intronic       |
| 4  | 3268710   | A | G | rs2858088            | 6.06E-01 | 0.410 | 0.400   | 0.96 | 0.84 | -1.09 | 3.36E-05 | 0.458 | 0.400 | 0.79 | 0.7  | -0.89 | 0.85 | 7.86E-04 | MSANTD1(dist=10368), RGS12(dist=47164)           | intergenic     |
| 3  | 143026285 | A | T | rs111532413          | 7.97E-01 | 0.035 | 0.034   | 1.02 | 0.73 | -1.43 | 3.73E-06 | 0.048 | 0.027 | 1.84 | 1.37 | -2.46 | 1.59 | 7.86E-04 | SLC9A9                                           | intronic       |
| 8  | 38851779  | C | T | rs73674682           | 9.80E-01 | 0.074 | 0.079   | 0.93 | 0.73 | -1.17 | 2.01E-06 | 0.115 | 0.073 | 1.63 | 1.35 | -1.98 | 1.34 | 7.92E-04 | TM2D2                                            | intronic       |
| 4  | 68190048  | C | G | rs12642496           | 4.76E-01 | 0.192 | 0.198   | 0.96 | 0.82 | -1.12 | 6.05E-05 | 0.159 | 0.211 | 0.71 | 0.61 | -0.83 | 0.83 | 8.01E-04 | MIR1269A(dist=1047402), LOC101927237(dist=92975) | intergenic     |
| 12 | 54536534  | C | G | rs1872636            | 6.77E-01 | 0.179 | 0.172   | 1.05 | 0.9  | -1.24 | 2.11E-05 | 0.237 | 0.196 | 1.27 | 1.1  | -1.46 | 1.24 | 8.14E-04 | LOC400043(dist=9908), SMUG1(dist=37608)          | intergenic     |
| 11 | 102705280 | A | G | rs3025087            | 4.43E-01 | 0.029 | 0.026   | 1.11 | 0.76 | -1.62 | 5.58E-05 | 0.042 | 0.022 | 1.96 | 1.43 | -2.68 | 1.61 | 8.15E-04 | WTAPP1                                           | ncRNA_intronic |
| 9  | 109853998 | A | G | rs72747504           | 6.39E-05 | 0.231 | 0.184   | 1.33 | 1.15 | -1.55 | 3.66E-01 | 0.195 | 0.181 | 1.09 | 0.94 | -1.27 | 1.21 | 8.15E-04 | LOC340512                                        | ncRNA_intronic |
| 9  | 19980454  | C | T | rs113945359          | 5.18E-01 | 0.055 | 0.053   | 1.04 | 0.79 | -1.37 | 3.89E-05 | 0.070 | 0.043 | 1.65 | 1.3  | -2.1  | 1.44 | 8.22E-04 | SLC24A2(dist=193437), MLLT3(dist=361209)         | intergenic     |
| 7  | 45897407  | T | C | rs1948553            | 7.81E-06 | 0.068 | 0.090   | 1.36 | 1.07 | -1.72 | 5.31E-01 | 0.100 | 0.111 | 1.13 | 0.93 | -1.37 | 1.39 | 8.25E-04 | SEPT7P2(dist=88790), IGFBP1(dist=30552)          | intergenic     |
| 1  | 242923484 | T | C | rs78076663           | 3.42E-01 | 0.091 | 0.102   | 0.88 | 0.71 | -1.09 | 3.78E-05 | 0.054 | 0.081 | 0.65 | 0.5  | -0.83 | 0.76 | 8.26E-04 | PLD5(dist=235486), LINC01347(dist=296132)        | intergenic     |
| 2  | 140211958 | C | T | rs11682693           | 4.72E-01 | 0.483 | 0.484   | 1.01 | 0.89 | -1.14 | 3.48E-05 | 0.540 | 0.474 | 1.30 | 1.16 | -1.47 | 1.17 | 8.34E-04 | YY1P2(dist=555214), LRP1B(dist=777038)           | intergenic     |
| 12 | 54517887  | C | T | rs7960592            | 8.96E-01 | 0.181 | 0.174   | 1.05 | 0.89 | -1.23 | 1.04E-05 | 0.250 | 0.210 | 1.25 | 1.09 | -1.44 | 1.25 | 8.37E-04 | FLJ12825(dist=1869), LOC400043(dist=1968)        | intergenic     |
| 19 | 20360248  | T | A | rs58051604           | 6.55E-01 | 0.085 | 0.078   | 1.10 | 0.88 | -1.37 | 3.85E-05 | 0.114 | 0.089 | 1.32 | 1.09 | -1.59 | 1.36 | 8.38E-04 | ZNF486(dist=48949), MIR1270(dist=149833)         | intergenic     |
| 7  | 9312165   | C | T | rs10242847           | 3.80E-06 | 0.065 | 0.037   | 1.79 | 1.35 | -2.36 | 9.47E-01 | 0.041 | 0.039 | 1.05 | 0.78 | -1.41 | 1.50 | 8.39E-04 | NXP1H1(dist=519572), PER4(dist=361735)           | intergenic     |
| 3  | 178896585 | A | G | rs61796466           | 6.26E-01 | 0.037 | 0.036   | 1.05 | 0.75 | -1.46 | 5.17E-05 | 0.021 | 0.044 | 0.48 | 0.33 | -0.7  | 0.64 | 8.42E-04 | PIK3CA                                           | intronic       |
| 1  | 242922145 | T | A | rs4303064            | 3.15E-01 | 0.092 | 0.103   | 0.88 | 0.72 | -1.09 | 4.43E-05 | 0.054 | 0.080 | 0.65 | 0.5  | -0.83 | 0.76 | 8.42E-04 | PLD5(dist=234147), LINC01347(dist=297471)        | intergenic     |
| 6  | 5378963   | A | G | rs77354171           | 5.66E-01 | 0.032 | 0.031   | 1.03 | 0.72 | -1.47 | 2.19E-05 | 0.045 | 0.025 | 1.88 | 1.39 | -2.54 | 1.63 | 8.45E-04 | FARS2                                            | intronic       |
| 19 | 20351786  | A | G | rs72998689           | 7.14E-01 | 0.085 | 0.079   | 1.09 | 0.87 | -1.37 | 2.68E-05 | 0.114 | 0.089 | 1.32 | 1.09 | -1.6  | 1.36 | 8.48E-04 | ZNF486(dist=40487), MIR1270(dist=158295)         | intergenic     |
| 3  | 143041625 | C | T | rs148879857          | 4.94E-01 | 0.035 | 0.032   | 1.11 | 0.79 | -1.56 | 2.33E-05 | 0.046 | 0.026 | 1.79 | 1.33 | -2.41 | 1.55 | 8.50E-04 | SLC9A9                                           | intronic       |
| 19 | 50307408  | G | A | rs11879637           | 6.11E-01 | 0.390 | 0.379   | 1.05 | 0.92 | -1.19 | 3.47E-05 | 0.417 | 0.364 | 1.25 | 1.11 | -1.4  | 1.17 | 8.52E-04 | AP2A1                                            | intronic       |
| 6  | 31882024  | A | G | rs2844452            | 5.59E-01 | 0.485 | 0.496   | 1.04 | 0.92 | -1.18 | 3.39E-05 | 0.540 | 0.477 | 1.29 | 1.15 | -1.45 | 1.16 | 8.58E-04 | C2                                               | intronic       |
| 5  | 79477533  | G | A | rs116152050          | 3.65E-05 | 0.040 | 0.022   | 1.81 | 1.27 | -2.58 | 5.34E-01 | 0.032 | 0.029 | 1.12 | 0.8  | -1.57 | 1.63 | 8.61E-04 | SERINC5                                          | intronic       |
| 11 | 102708338 | C | T | rs3025076            | 4.57E-01 | 0.028 | 0.026   | 1.11 | 0.76 | -1.62 | 5.58E-05 | 0.042 | 0.022 | 1.96 | 1.43 | -2.68 | 1.61 | 8.63E-04 | MMP3                                             | intronic       |
| 11 | 104998166 | C | G | rs77410777           | 8.40E-06 | 0.076 | 0.050   | 1.56 | 1.21 | -2    | 9.00E-01 | 0.043 | 0.042 | 1.03 | 0.77 | -1.37 | 1.49 | 8.65E-04 | CARD17(dist=26008), CARD18(dist=10282)           | intergenic     |
| 3  | 178792754 | G | A | rs61798206           | 6.12E-01 | 0.035 | 0.034   | 1.04 | 0.74 | -1.46 | 4.79E-05 | 0.019 | 0.041 | 0.46 | 0.31 | -0.69 | 0.64 | 8.66E-04 | ZMAT3(dist=3098), LOC101928739(dist=26405)       | intergenic     |
| 7  | 157987251 | T | C | rs4416779            | 7.04E-01 | 0.266 | 0.256   | 0.95 | 0.82 | -1.09 | 8.25E-06 | 0.255 | 0.319 | 1.37 | 1.2  | -1.56 | 1.20 | 8.66E-04 | TPPRN2                                           | intronic       |
| 15 | 89867479  | G | A | rs2307452            | 4.87E-01 | 0.068 | 0.066   | 1.03 | 0.8  | -1.31 | 4.61E-05 | 0.080 | 0.051 | 1.63 | 1.3  | -2.04 | 1.39 | 8.69E-04 | POLG                                             | intronic       |
| 14 | 62762455  | A | T | rs1399522            | 5.71E-01 | 0.404 | 0.397   | 1.03 | 0.91 | -1.17 | 5.38E-05 | 0.436 | 0.372 | 1.30 | 1.16 | -1.47 | 1.16 | 8.84E-04 | LINC00644(dist=155764), KCNH5(dist=410836)       | intergenic     |
| 14 | 62751303  | C | T | rs11624249           | 4.73E-01 | 0.246 | 0.242   | 1.02 | 0.88 | -1.18 | 5.00E-05 | 0.260 | 0.209 | 1.32 | 1.16 | -1.52 | 1.21 | 8.89E-04 | LINC00644(dist=144612), KCNH5(dist=421988)       | intergenic     |
| 6  | 29404913  | C | T | rs141611861          | 5.44E-01 | 0.117 | 0.113   | 1.04 | 0.85 | -1.26 | 3.49E-05 | 0.145 | 0.100 | 1.52 | 1.28 | -1.81 | 1.27 | 8.91E-04 | OR11A1(dist=9404), OR10C1(dist=2803)             | intergenic     |
| 6  | 91346050  | A | G | rs62409078           | 6.14E-05 | 0.155 | 0.113   | 1.44 | 1.2  | -1.72 | 4.37E-01 | 0.128 | 0.121 | 1.07 | 0.9  | -1.27 | 1.26 | 8.92E-04 | MAP3K7(dist=49030), MIR4643(dist=885328)         | intergenic     |
| 14 | 77142576  | G | A | rs11626940           | 7.09E-01 | 0.079 | 0.071   | 1.13 | 0.89 | -1.42 | 2.18E-05 | 0.103 | 0.077 | 1.37 | 1.12 | -1.66 | 1.34 | 8.96E-04 | ESRRB(dist=174396), VASH1(dist=85659)            | intergenic     |
| 2  | 227332574 | T | C | rs11899174           | 4.33E-05 | 0.143 | 0.191   | 1.07 | 0.59 | -0.84 | 4.66E-01 | 0.187 | 0.196 | 0.95 | 0.82 | -1.1  | 0.81 | 8.96E-04 | LOC646736(dist=287796), MIR5702(dist=190852)     | intergenic     |
| 7  | 14226588  | C | T | rs111355284          | 3.10E-01 | 0.081 | 0.079   | 1.04 | 0.83 | -1.3  | 6.19E-06 | 0.083 | 0.057 | 1.49 | 1.19 | -1.85 | 1.41 | 8.97E-04 | DGKB                                             | intronic       |
| 2  | 60137193  | C | T | rs2194701;rs75398865 | 6.25E-01 | 0.402 | 0.387   | 1.06 | 0.94 | -1.21 | 1.74E-05 | 0.461 | 0.404 | 1.26 | 1.12 | -1.42 | 1.17 | 8.98E-04 | LOC101927285(dist=630658), MIR4432(dist=477304)  | intergenic     |
| 21 | 34121855  | T | C | rs9981311            | 1.84E-05 | 0.111 | 0.157   | 0.67 | 0.56 | -0.81 | 6.44E-01 | 0.134 | 0.136 | 0.99 | 0.83 | -1.17 | 0.80 | 9.04E-04 | PAXBP1                                           | intronic       |
| 19 | 58333594  | A | G | rs4602135            | 5.45E-01 | 0.141 | 0.137   | 1.04 | 0.87 | -1.24 | 3.84E-05 | 0.165 | 0.128 | 1.34 | 1.14 | -1.58 | 1.27 | 9.13E-04 | ZNF552(dist=7313), FKBP1AP1(dist=3073)           | intergenic     |
| 14 | 77136029  | G | A | rs11625879           | 6.54E-01 | 0.075 | 0.067   | 1.14 | 0.9  | -1.45 | 3.05E-05 | 0.096 | 0.073 | 1.35 | 1.1  | -1.66 | 1.36 | 9.15E-04 | ESRRB(dist=167849), VASH1(dist=92206)            | intergenic     |
| 5  | 26010974  | G | A | rs10472548           | 4.75E-05 | 0.161 | 0.123   | 1.38 | 1.15 | -1.64 | 4.89E-01 | 0.144 | 0.139 | 1.05 | 0.88 | -1.24 | 1.28 | 9.16E-04 | LOC340107(dist=1170282), CDH9(dist=869735)       | intergenic     |
| 18 | 10225104  | G | A | rs59886995           | 4.77E-05 | 0.016 | 0.038   | 0.42 | 0.27 | -0.65 | 7.54E-01 | 0.031 | 0.031 | 1.01 | 0.72 | -1.41 | 0.60 | 9.23E-04 | VAPA(dist=265086), LINC01254(dist=180026)        | intergenic     |
| 3  | 64053207  | T | C | rs166230             | 9.60E-01 | 0.208 | 0.211   | 1.02 | 0.87 | -1.19 | 4.15E-06 | 0.236 | 0.186 | 0.74 | 0.64 | -0.85 | 0.83 | 9.28E-04 | PRICKLE2-AS1                                     | upstream       |
| 7  | 9308805   | C | T | rs116170098          | 4.17E-06 | 0.065 | 0.037   | 1.78 | 1.35 | -2.36 | 9.26E-01 | 0.041 | 0.039 | 1.04 | 0.78 | -1.4  | 1.49 | 9.30E-04 | NXP1H1(dist=516212), PER4(dist=365095)           | intergenic     |
| 5  | 34515238  | G | A | rs78103323           | 6.47E-05 | 0.034 | 0.063   | 0.53 | 0.39 | -0.73 | 6.69E-01 | 0.040 | 0.040 | 1.00 | 0.74 | -1.34 | 0.68 | 9.31E-04 | C1QTNF3-AMACR(dist=390605), RAI14(dist=141195)   | intergenic     |
| 18 | 10229841  | C | A | rs73944732           | 4.88E-05 | 0.020 | 0.043   | 0.44 | 0.3  | -0.67 | 8.14E-01 | 0.036 | 0.035 | 1.03 | 0.75 | -1.4  | 0.63 | 9.36E-04 | VAPA(dist=269823), LINC01254(dist=175289)        | intergenic     |
| 19 | 50301545  | G | A | rs7251463            | 6.01E-01 | 0.394 | 0.384   | 1.05 | 0.92 | -1.19 | 1.62E-05 | 0.416 | 0.368 | 1.22 | 1.08 | -1.37 | 1.18 | 9.41E-04 | AP2A1                                            | intronic       |
| 14 | 26611535  | A | G | rs10483312           | 8.18E-01 | 0.026 | 0.022   | 1.20 | 0.8  | -1.78 | 7.02E-06 | 0.055 | 0.037 | 1.48 | 1.13 | -1.94 | 1.60 | 9.52E-04 | STXBP6(dist=1092032), NOVA1(dist=303554)         | intergenic     |
| 18 | 5007091   | C | A | rs59728271           | 5.33E-01 | 0.355 | 0.360   | 0.98 | 0.86 | -1.11 | 5.93E-05 | 0.371 | 0.313 | 1.29 | 1.14 | -1.46 | 1.20 | 9.57E-04 | DLGAP1(dist=551825), C18orf42(dist=136581)       | intergenic     |
| 19 | 11640549  | A | G | rs10412437           | 9.78E-06 | 0.526 | 0.484</ |      |      |       |          |       |       |      |      |       |      |          |                                                  |                |

|    |           |   |   |                        |          |       |       |                  |          |       |       |                  |               |                                                   |                |
|----|-----------|---|---|------------------------|----------|-------|-------|------------------|----------|-------|-------|------------------|---------------|---------------------------------------------------|----------------|
| 10 | 15459613  | T | A | rs56294000             | 5.50E-01 | 0.117 | 0.108 | 1.09 0.9 - 1.33  | 6.25E-05 | 0.136 | 0.104 | 1.36 1.14 - 1.62 | 1.28 9.93E-04 | FAM171A1(dist=46555), ITGA8(dist=96335)           | intergenic     |
| 19 | 50304336  | A | G | rs1003424              | 8.18E-01 | 0.406 | 0.399 | 1.03 0.91 - 1.17 | 1.19E-05 | 0.441 | 0.384 | 1.26 1.12 - 1.42 | 1.17 9.97E-04 | AP2A1                                             | intronic       |
| 3  | 30188241  | A | G | rs115041955            | 7.18E-01 | 0.026 | 0.027 | 1.98 0.67 - 1.44 | 4.65E-05 | 0.049 | 0.028 | 1.77 1.33 - 2.36 | 1.62 1.01E-03 | RBMS3(dist=136355), TGFBR2(dist=459753)           | intergenic     |
| 6  | 29405294  | A | G | rs116794822            | 5.56E-01 | 0.116 | 0.113 | 1.03 0.85 - 1.26 | 3.77E-05 | 0.139 | 0.095 | 1.54 1.29 - 1.83 | 1.27 1.01E-03 | OR11A1(dist=9785), OR10C1(dist=2422)              | intergenic     |
| 3  | 178935943 | C | T | rs45455192             | 6.83E-01 | 0.037 | 0.035 | 1.06 0.76 - 1.48 | 5.35E-05 | 0.021 | 0.043 | 0.48 0.32 - 0.7  | 0.64 1.02E-03 | PIK3CA                                            | intronic       |
| 19 | 20397192  | G | A | rs11673473             | 6.82E-01 | 0.081 | 0.075 | 1.09 0.86 - 1.37 | 4.50E-05 | 0.108 | 0.082 | 1.34 1.11 - 1.63 | 1.36 1.02E-03 | ZNF486(dist=85893), MIR1270(dist=112889)          | intergenic     |
| 15 | 89870347  | G | A | rs2307453              | 5.63E-01 | 0.066 | 0.066 | 1.01 0.79 - 1.3  | 3.85E-05 | 0.079 | 0.050 | 1.64 1.3 - 2.05  | 1.39 1.02E-03 | POLG                                              | intronic       |
| 19 | 20398459  | C | T | rs60147306             | 7.04E-01 | 0.081 | 0.075 | 1.09 0.86 - 1.37 | 4.09E-05 | 0.107 | 0.082 | 1.35 1.11 - 1.64 | 1.36 1.03E-03 | ZNF486(dist=87160), MIR1270(dist=111622)          | intergenic     |
| 14 | 62793384  | A | G | rs75421668             | 5.32E-01 | 0.383 | 0.379 | 0.98 0.87 - 1.12 | 5.48E-05 | 0.403 | 0.342 | 0.77 0.68 - 0.87 | 0.86 1.03E-03 | LINC00644(dist=186693), KCNH5(dist=379907)        | intergenic     |
| 11 | 5434112   | A | G | rs10838064             | 5.47E-01 | 0.416 | 0.422 | 1.02 0.9 - 1.16  | 4.49E-05 | 0.460 | 0.394 | 0.76 0.68 - 0.86 | 0.85 1.03E-03 | OR51B5                                            | intronic       |
| 1  | 221212522 | G | A | rs12097387             | 4.78E-01 | 0.244 | 0.244 | 1.00 0.87 - 1.15 | 2.17E-05 | 0.262 | 0.205 | 1.38 1.2 - 1.58  | 1.21 1.04E-03 | HLX(dist=154122), C1orf140(dist=290748)           | intergenic     |
| 5  | 117755812 | G | A | rs78814990             | 9.57E-01 | 0.066 | 0.069 | 0.95 0.74 - 1.22 | 3.17E-06 | 0.093 | 0.057 | 1.70 1.37 - 2.1  | 1.37 1.04E-03 | LOC101927280                                      | ncRNA_intronic |
| 5  | 117757644 | G | A | rs114818095            | 9.56E-01 | 0.066 | 0.069 | 0.95 0.74 - 1.22 | 3.25E-06 | 0.093 | 0.057 | 1.70 1.37 - 2.1  | 1.37 1.05E-03 | LOC101927280                                      | ncRNA_intronic |
| 13 | 100433420 | T | A | rs12869202             | 6.66E-01 | 0.364 | 0.375 | 1.05 0.92 - 1.19 | 2.56E-05 | 0.333 | 0.383 | 1.24 1.1 - 1.41  | 1.19 1.05E-03 | LOC101927437                                      | ncRNA_intronic |
| 2  | 224883317 | A | T | rs115500795            | 4.30E-05 | 0.090 | 0.060 | 1.56 1.24 - 1.97 | 5.43E-01 | 0.073 | 0.065 | 1.13 0.9 - 1.42  | 1.37 1.05E-03 | SERPINE2                                          | intronic       |
| 19 | 20391812  | G | C | rs55820568             | 6.77E-01 | 0.081 | 0.074 | 1.09 0.87 - 1.37 | 4.88E-05 | 0.106 | 0.081 | 1.34 1.11 - 1.63 | 1.36 1.06E-03 | ZNF486(dist=80513), MIR1270(dist=118269)          | intergenic     |
| 19 | 20391825  | G | A | rs55698749             | 6.77E-01 | 0.081 | 0.074 | 1.09 0.87 - 1.37 | 4.88E-05 | 0.106 | 0.081 | 1.34 1.11 - 1.63 | 1.36 1.06E-03 | ZNF486(dist=80526), MIR1270(dist=118269)          | intergenic     |
| 19 | 20391467  | G | C | rs73000751             | 6.77E-01 | 0.080 | 0.074 | 1.09 0.87 - 1.37 | 4.90E-05 | 0.106 | 0.081 | 1.34 1.11 - 1.63 | 1.36 1.06E-03 | ZNF486(dist=80168), MIR1270(dist=118516)          | intergenic     |
| 10 | 130777272 | C | A | rs59034365             | 2.99E-05 | 0.058 | 0.038 | 1.56 1.17 - 2.07 | 7.52E-01 | 0.026 | 0.024 | 1.11 0.77 - 1.61 | 1.69 1.07E-03 | LINC01163(dist=661282), MGMT(dist=488182)         | intergenic     |
| 13 | 100433422 | A | T | rs12868025;rs199715736 | 5.45E-01 | 0.372 | 0.385 | 1.06 0.93 - 1.2  | 5.02E-05 | 0.347 | 0.393 | 1.22 1.08 - 1.38 | 1.19 1.08E-03 | LOC101927437                                      | ncRNA_intronic |
| 7  | 45912764  | A | G | rs10241749;rs386712768 | 2.04E-05 | 0.069 | 0.093 | 1.39 1.1 - 1.75  | 5.24E-01 | 0.099 | 0.108 | 1.11 0.91 - 1.35 | 1.37 1.09E-03 | SEPT7P2(dist=104147), IGFBP1(dist=15195)          | intergenic     |
| 11 | 41217610  | G | A | rs114370510            | 1.17E-05 | 0.075 | 0.048 | 1.59 1.24 - 2.05 | 6.42E-01 | 0.060 | 0.054 | 1.11 0.87 - 1.42 | 1.40 1.11E-03 | LRRC4C                                            | intronic       |
| 17 | 26419883  | G | A | rs34455313             | 5.72E-05 | 0.054 | 0.026 | 2.12 1.55 - 2.91 | 5.74E-01 | 0.050 | 0.053 | 0.94 0.72 - 1.22 | 1.55 1.12E-03 | NLK                                               | intronic       |
| 19 | 20359950  | T | C | rs57015009             | 7.40E-01 | 0.084 | 0.078 | 1.09 0.87 - 1.36 | 3.99E-05 | 0.114 | 0.089 | 1.32 1.09 - 1.59 | 1.35 1.12E-03 | ZNF486(dist=48651), MIR1270(dist=150131)          | intergenic     |
| 18 | 10213500  | T | A | rs73945425             | 5.76E-05 | 0.018 | 0.040 | 0.45 0.3 - 0.69  | 7.83E-01 | 0.030 | 0.030 | 1.01 0.72 - 1.43 | 0.60 1.12E-03 | VAPA(dist=253482), LINC01254(dist=191630)         | intergenic     |
| 15 | 24586212  | A | G | rs180754592            | 6.82E-01 | 0.036 | 0.037 | 0.98 0.71 - 1.37 | 5.15E-05 | 0.054 | 0.031 | 1.78 1.35 - 2.34 | 1.52 1.12E-03 | PWRN2(dist=171159), PWRN3(dist=10062)             | intergenic     |
| 19 | 50301820  | A | G | rs7247082              | 6.45E-01 | 0.185 | 0.179 | 1.04 0.89 - 1.22 | 4.98E-05 | 0.205 | 0.160 | 1.35 1.17 - 1.57 | 1.22 1.13E-03 | AP2A1                                             | intronic       |
| 18 | 10212868  | C | T | rs59537660             | 5.81E-05 | 0.018 | 0.040 | 0.45 0.3 - 0.69  | 7.84E-01 | 0.030 | 0.030 | 1.01 0.72 - 1.43 | 0.60 1.13E-03 | VAPA(dist=252850), LINC01254(dist=192262)         | intergenic     |
| 4  | 122554241 | A | C | rs60035947             | 9.03E-01 | 0.282 | 0.282 | 1.00 0.87 - 1.15 | 7.73E-06 | 0.236 | 0.296 | 0.73 0.64 - 0.84 | 0.84 1.13E-03 | QRFPR(dist=252060), ANXA5(dist=34911)             | intergenic     |
| 18 | 27863027  | C | A | rs36069798             | 7.56E-01 | 0.451 | 0.456 | 0.98 0.87 - 1.11 | 1.54E-05 | 0.377 | 0.435 | 0.79 0.7 - 0.89  | 0.86 1.14E-03 | NONE(dist=NONE), MIR302F(dist=15849)              | intergenic     |
| 17 | 33273163  | T | C | rs114899415            | 2.20E-06 | 0.051 | 0.090 | 0.54 0.42 - 0.71 | 8.15E-01 | 0.064 | 0.060 | 1.06 0.83 - 1.35 | 0.74 1.15E-03 | CCT6B                                             | intronic       |
| 11 | 104957726 | A | C | rs12273474             | 6.97E-06 | 0.073 | 0.048 | 1.55 1.2 - 2     | 8.99E-01 | 0.044 | 0.043 | 1.03 0.77 - 1.37 | 1.49 1.15E-03 | CARD16(dist=41675), CARD17(dist=5470)             | intergenic     |
| 8  | 97348951  | G | A | rs62514612             | 5.15E-01 | 0.096 | 0.088 | 1.10 0.89 - 1.37 | 5.79E-05 | 0.115 | 0.086 | 1.38 1.15 - 1.67 | 1.32 1.15E-03 | PTDSS1(dist=2172), LOC102724804(dist=35203)       | intergenic     |
| 5  | 25996181  | C | T | rs6860634              | 2.66E-05 | 0.164 | 0.120 | 1.45 1.21 - 1.72 | 6.45E-01 | 0.140 | 0.139 | 1.01 0.85 - 1.19 | 1.25 1.15E-03 | LOC340107(dist=1155489), CDH9(dist=884528)        | intergenic     |
| 4  | 68192857  | C | T | rs1348060              | 6.55E-01 | 0.481 | 0.486 | 0.98 0.87 - 1.11 | 5.37E-05 | 0.443 | 0.510 | 0.76 0.68 - 0.86 | 0.86 1.16E-03 | MIR1269A(dist=1050211), LOC101927237(dist=90166)  | intergenic     |
| 6  | 29407975  | C | T | rs11755177             | 5.68E-01 | 0.117 | 0.114 | 1.03 0.85 - 1.25 | 4.53E-05 | 0.140 | 0.096 | 1.53 1.28 - 1.82 | 1.27 1.17E-03 | OR10C1                                            | exonic         |
| 20 | 13676460  | C | A | rs11907621             | 8.05E-01 | 0.020 | 0.021 | 1.00 0.64 - 1.55 | 2.98E-05 | 0.039 | 0.020 | 1.96 1.41 - 2.72 | 1.71 1.17E-03 | TASP1(dist=56877), ESF1(dist=18509)               | intergenic     |
| 18 | 10227666  | C | T | rs73942893             | 4.31E-05 | 0.015 | 0.037 | 0.41 0.26 - 0.64 | 8.76E-01 | 0.031 | 0.030 | 1.03 0.74 - 1.45 | 0.61 1.18E-03 | VAPA(dist=267648), LINC01254(dist=177464)         | intergenic     |
| 18 | 10224838  | T | A | rs79115711             | 4.94E-05 | 0.016 | 0.037 | 0.42 0.27 - 0.65 | 8.43E-01 | 0.031 | 0.030 | 1.03 0.73 - 1.44 | 0.61 1.18E-03 | VAPA(dist=264820), LINC01254(dist=180292)         | intergenic     |
| 3  | 168402653 | G | C | rs6774143              | 5.98E-01 | 0.149 | 0.135 | 0.89 0.75 - 1.06 | 5.57E-05 | 0.196 | 0.161 | 0.79 0.68 - 0.91 | 0.81 1.18E-03 | EGFEM1P                                           | ncRNA_intronic |
| 8  | 61462541  | A | G | rs11778888             | 4.97E-05 | 0.187 | 0.239 | 0.73 0.63 - 0.86 | 4.81E-01 | 0.210 | 0.219 | 0.94 0.82 - 1.09 | 0.84 1.18E-03 | RAB2A                                             | intronic       |
| 18 | 10224958  | C | T | rs58657051             | 4.94E-05 | 0.016 | 0.037 | 0.42 0.27 - 0.65 | 8.43E-01 | 0.031 | 0.030 | 1.03 0.73 - 1.44 | 0.61 1.18E-03 | VAPA(dist=264940), LINC01254(dist=180172)         | intergenic     |
| 1  | 52407590  | G | C | rs1935290              | 5.14E-01 | 0.034 | 0.028 | 1.22 0.86 - 1.73 | 3.46E-05 | 0.043 | 0.027 | 1.65 1.22 - 2.24 | 1.62 1.18E-03 | RAB3B                                             | intronic       |
| 12 | 114982606 | A | C | rs386766547;rs2252912  | 8.38E-01 | 0.385 | 0.380 | 1.02 0.9 - 1.16  | 2.48E-06 | 0.337 | 0.403 | 0.75 0.67 - 0.85 | 0.84 1.19E-03 | TBX5-AS1(dist=131969), TBX3(dist=125453)          | intergenic     |
| 1  | 26485291  | T | C | rs1335762              | 8.41E-01 | 0.188 | 0.175 | 1.10 0.93 - 1.29 | 8.29E-06 | 0.237 | 0.198 | 1.26 1.09 - 1.45 | 1.21 1.19E-03 | FAM110D                                           | upstream       |
| 3  | 168402381 | T | A | rs6763030              | 6.01E-01 | 0.149 | 0.135 | 0.89 0.75 - 1.06 | 5.56E-05 | 0.196 | 0.161 | 0.79 0.68 - 0.91 | 0.81 1.19E-03 | EGFEM1P                                           | ncRNA_intronic |
| 5  | 25996772  | G | A | rs10039353             | 2.76E-05 | 0.164 | 0.120 | 1.45 1.21 - 1.72 | 6.49E-01 | 0.140 | 0.139 | 1.01 0.85 - 1.19 | 1.24 1.19E-03 | LOC340107(dist=1156080), CDH9(dist=883937)        | intergenic     |
| 20 | 13669776  | C | T | rs138863896            | 8.75E-01 | 0.020 | 0.020 | 0.98 0.63 - 1.53 | 2.24E-05 | 0.039 | 0.020 | 1.94 1.4 - 2.69  | 1.73 1.20E-03 | TASP1(dist=50193), ESF1(dist=25193)               | intergenic     |
| 1  | 104446681 | G | A | rs6683918              | 7.09E-01 | 0.053 | 0.045 | 1.18 0.89 - 1.56 | 1.16E-05 | 0.079 | 0.059 | 1.36 1.09 - 1.7  | 1.42 1.20E-03 | AMY1A(dist=145370), LOC100129138(dist=168964)     | intergenic     |
| 8  | 38860388  | C | T | rs56061814             | 8.23E-01 | 0.078 | 0.086 | 0.90 0.72 - 1.13 | 1.98E-06 | 0.118 | 0.074 | 1.66 1.37 - 2.01 | 1.31 1.20E-03 | ADAM9                                             | intronic       |
| 4  | 58248526  | T | A | rs61357246             | 5.50E-01 | 0.035 | 0.033 | 1.07 0.76 - 1.5  | 2.85E-05 | 0.043 | 0.022 | 1.95 1.43 - 2.67 | 1.55 1.20E-03 | IGFBP7-AS1(dist=177061), LOC101928851(dist=43512) | intergenic     |
| 12 | 1629925   | G | A | rs4520648              | 9.55E-01 | 0.129 | 0.126 | 0.97 0.81 - 1.17 | 8.74E-06 | 0.091 | 0.135 | 1.56 1.28 - 1.9  | 1.27 1.21E-03 | LINC00942(dist=16335), FBXL14(dist=45234)         | intergenic     |
| 6  | 10921446  | A | C | rs150570415            | 3.86E-01 | 0.057 | 0.052 | 1.09 0.83 - 1.43 | 4.88E-05 | 0.067 | 0.043 | 1.58 1.24 - 2.02 | 1.45 1.21E-03 | SYCP2L                                            | intronic       |
| 18 | 27864820  | T | C | rs4316825              | 7.50E-01 | 0.452 | 0.456 | 0.98 0.87 - 1.11 | 1.81E-05 | 0.379 | 0.436 | 0.79 0.7 - 0.89  | 0.86 1.21E-03 | NONE(dist=NONE), MIR302F(dist=14056)              | intergenic     |
| 5  | 117758301 | A | G | rs151084222            | 9.78E-01 | 0.064 | 0.068 | 0.94 0.74 - 1.21 | 4.05E-06 | 0.091 | 0.056 | 1.70 1.37 - 2.11 | 1.37 1.22E-03 | LOC101927280                                      | ncRNA_intronic |
| 7  | 109522894 | G | T | rs79635605             | 3.11E-05 | 0.076 | 0.119 | 0.61 0.49 - 0.76 | 7.50E-01 | 0.110 | 0.109 | 1.01 0.84 - 1.22 | 0.77 1.24E-03 | C7orf66(dist=998250), EIF3IP1(dist=76390)         | intergenic     |
| 10 | 89459346  | C | T | rs142306880            | 8.88E-01 | 0.039 | 0.041 | 0.95 0.69 - 1.3  | 2.51E-05 | 0.059 | 0.035 | 1.72 1.32 - 2.24 | 1.51 1.24E-03 | PAPSS2                                            | intronic       |
| 6  | 29408057  | C | A | rs11755182             | 6.14E-01 | 0.113 | 0.110 | 1.03 0.84 - 1.25 | 4.54E-05 | 0.140 | 0.096 | 1.53 1.28 - 1.82 | 1.27 1.25E-03 | OR10C1                                            | exonic         |
| 5  | 25997102  | G | A | rs10063622             | 2.83E-05 | 0.165 | 0.120 | 1.44 1.21 - 1.72 | 6.58E-01 | 0.141 | 0.140 | 1.01 0.85 - 1.19 | 1.24 1.25E-03 | LOC340107(dist=1156410), CDH9(dist=883607)        | intergenic     |
| 18 | 28024379  | A | C | rs62079985             | 6.05E-05 | 0.258 | 0.312 | 0.77 0.67 - 0.88 | 6.59E-01 | 0.249 | 0.254 | 0.97 0.85 - 1.11 | 0.85 1.25E-03 | MIR302F(dist=145453), DSC3(dist=544952)           | intergenic     |
| 15 | 61084364  | A | C | rs75411089             | 9.00E-01 | 0.118 | 0.104 | 1.15 0.95 - 1.4  | 8.89E-06 | 0.146 | 0.116 | 1.30 1.09 - 1.54 | 1.27 1.25E-03 | RORA                                              | intronic       |
| 3  | 59745406  | C | G | rs4679504              |          |       |       |                  |          |       |       |                  |               |                                                   |                |



|    |           |   |   |                        |          |       |       |      |      |       |          |       |       |      |      |       |      |          |                                                   |                |
|----|-----------|---|---|------------------------|----------|-------|-------|------|------|-------|----------|-------|-------|------|------|-------|------|----------|---------------------------------------------------|----------------|
| 5  | 117762894 | C | G | rs75143667             | 9.70E-01 | 0.064 | 0.067 | 0.95 | 0.74 | -1.22 | 4.88E-06 | 0.091 | 0.056 | 1.69 | 1.37 | -2.1  | 1.37 | 1.27E-03 | LOC101927280                                      | ncRNA_intronic |
| 19 | 50308134  | G | C | rs2241040              | 7.90E-01 | 0.410 | 0.403 | 1.03 | 0.91 | -1.17 | 2.27E-05 | 0.441 | 0.386 | 1.25 | 1.11 | -1.41 | 1.16 | 1.27E-03 | AP2A1                                             | intronic       |
| 14 | 94369104  | T | C | rs4905111              | 5.82E-01 | 0.068 | 0.061 | 0.89 | 0.69 | -1.14 | 3.40E-05 | 0.086 | 0.062 | 0.70 | 0.57 | -0.87 | 0.73 | 1.27E-03 | PRIMA1(dist=114338), FAM181A-AS1(dist=1972)       | intergenic     |
| 18 | 72908354  | G | A | rs145717809            | 2.41E-05 | 0.070 | 0.044 | 1.63 | 1.25 | -2.12 | 9.43E-01 | 0.037 | 0.035 | 1.04 | 0.76 | -1.43 | 1.46 | 1.28E-03 | ZADH2                                             | downstream     |
| 21 | 16835028  | G | A | rs12626383;rs201766816 | 5.89E-01 | 0.424 | 0.443 | 0.92 | 0.82 | -1.05 | 4.87E-05 | 0.397 | 0.441 | 0.83 | 0.74 | -0.94 | 0.85 | 1.31E-03 | NRIP1(dist=397902), USP25(dist=267316)            | intergenic     |
| 15 | 33898218  | A | G | rs58352226             | 6.21E-01 | 0.280 | 0.282 | 0.99 | 0.86 | -1.13 | 5.75E-05 | 0.229 | 0.283 | 0.75 | 0.66 | -0.86 | 0.85 | 1.32E-03 | RYR3                                              | intronic       |
| 5  | 117748902 | C | G | rs7714378              | 9.78E-01 | 0.065 | 0.068 | 0.95 | 0.74 | -1.21 | 4.92E-06 | 0.091 | 0.056 | 1.70 | 1.37 | -2.1  | 1.36 | 1.32E-03 | LOC101927280                                      | ncRNA_intronic |
| 3  | 168397443 | T | A | rs6764149              | 6.38E-01 | 0.149 | 0.135 | 0.90 | 0.75 | -1.07 | 5.49E-05 | 0.195 | 0.160 | 0.79 | 0.68 | -0.91 | 0.81 | 1.33E-03 | EGFEM1P                                           | ncRNA_intronic |
| 5  | 75940899  | C | T | rs151089490            | 4.72E-05 | 0.035 | 0.065 | 0.52 | 0.38 | -0.71 | 8.33E-01 | 0.049 | 0.046 | 1.05 | 0.8  | -1.38 | 0.70 | 1.33E-03 | IQGAP2                                            | intronic       |
| 14 | 105433947 | C | A | rs115956192            | 8.57E-01 | 0.027 | 0.027 | 1.00 | 0.68 | -1.46 | 1.93E-06 | 0.040 | 0.021 | 1.90 | 1.38 | -2.62 | 1.72 | 1.33E-03 | AHNAK2                                            | intronic       |
| 4  | 122562546 | G | C | rs1842382              | 8.80E-01 | 0.280 | 0.280 | 1.00 | 0.87 | -1.15 | 1.02E-05 | 0.235 | 0.294 | 0.74 | 0.64 | -0.85 | 0.85 | 1.34E-03 | QRFPR(dist=260365), ANXA5(dist=26606)             | intergenic     |
| 5  | 75936133  | G | A | rs79333188             | 4.76E-05 | 0.035 | 0.065 | 0.52 | 0.38 | -0.71 | 8.33E-01 | 0.050 | 0.047 | 1.05 | 0.8  | -1.38 | 0.70 | 1.34E-03 | IQGAP2                                            | intronic       |
| 19 | 50306198  | G | T | rs28736735             | 6.85E-01 | 0.185 | 0.180 | 1.04 | 0.88 | -1.22 | 5.41E-05 | 0.204 | 0.159 | 1.36 | 1.17 | -1.57 | 1.22 | 1.35E-03 | AP2A1                                             | intronic       |
| 18 | 10230884  | C | T | rs73944735             | 5.79E-05 | 0.017 | 0.038 | 0.44 | 0.28 | -0.67 | 8.30E-01 | 0.033 | 0.032 | 1.02 | 0.74 | -1.43 | 0.61 | 1.35E-03 | VAPA(dist=270866), LINC01254(dist=174246)         | intergenic     |
| 5  | 27249348  | G | A | rs4133220              | 3.09E-05 | 0.045 | 0.071 | 0.62 | 0.46 | -0.82 | 6.10E-01 | 0.060 | 0.067 | 0.88 | 0.69 | -1.13 | 0.73 | 1.35E-03 | CDH9(dist=210659), LINC01021(dist=223051)         | intergenic     |
| 9  | 38055128  | A | G | rs3849927              | 7.44E-01 | 0.342 | 0.338 | 0.98 | 0.86 | -1.12 | 2.61E-05 | 0.376 | 0.320 | 0.78 | 0.69 | -0.88 | 0.85 | 1.36E-03 | SHB                                               | intronic       |
| 18 | 10231104  | T | C | rs61028671             | 5.90E-05 | 0.017 | 0.038 | 0.44 | 0.28 | -0.68 | 8.31E-01 | 0.033 | 0.032 | 1.02 | 0.74 | -1.43 | 0.61 | 1.37E-03 | VAPA(dist=271086), LINC01254(dist=174026)         | intergenic     |
| 8  | 117397606 | T | A | rs10107681             | 2.19E-05 | 0.450 | 0.524 | 0.74 | 0.66 | -0.84 | 6.48E-01 | 0.484 | 0.479 | 1.02 | 0.91 | -1.14 | 0.86 | 1.37E-03 | LINC00536(dist=60309), EIF3H(dist=259449)         | intergenic     |
| 11 | 18180484  | C | T | rs12278693             | 8.89E-01 | 0.034 | 0.035 | 0.97 | 0.69 | -1.37 | 3.94E-06 | 0.050 | 0.028 | 1.81 | 1.36 | -2.41 | 1.58 | 1.38E-03 | MRGPRX3(dist=20457), MRGPRX4(dist=13900)          | intergenic     |
| 8  | 5903561   | A | T | rs79754409             | 1.41E-05 | 0.066 | 0.033 | 2.10 | 1.58 | -2.79 | 6.18E-01 | 0.051 | 0.057 | 0.90 | 0.69 | -1.17 | 1.43 | 1.42E-03 | CSMD1(dist=1051233), LOC100287015(dist=357516)    | intergenic     |
| 4  | 122556687 | A | T | rs4773669              | 9.11E-01 | 0.279 | 0.279 | 1.00 | 0.87 | -1.15 | 9.65E-06 | 0.235 | 0.294 | 0.74 | 0.64 | -0.84 | 0.85 | 1.42E-03 | QRFPR(dist=254506), ANXA5(dist=32465)             | intergenic     |
| 5  | 75935296  | A | G | rs74450839             | 4.66E-05 | 0.035 | 0.065 | 0.52 | 0.38 | -0.71 | 8.62E-01 | 0.049 | 0.046 | 1.05 | 0.8  | -1.39 | 0.71 | 1.42E-03 | IQGAP2                                            | intronic       |
| 8  | 124207022 | C | T | rs34704426             | 8.50E-01 | 0.059 | 0.051 | 1.15 | 0.88 | -1.51 | 4.03E-05 | 0.093 | 0.069 | 1.38 | 1.12 | -1.7  | 1.35 | 1.43E-03 | FAM83A                                            | intronic       |
| 8  | 61418903  | T | C | rs35837434             | 3.31E-05 | 0.188 | 0.241 | 0.73 | 0.62 | -0.85 | 5.74E-01 | 0.213 | 0.221 | 0.95 | 0.83 | -1.1  | 0.84 | 1.43E-03 | LINC01301(dist=92526), RAB2A(dist=10566)          | intergenic     |
| 13 | 109683497 | C | T | rs140898862            | 7.61E-06 | 0.052 | 0.032 | 1.66 | 1.22 | -2.25 | 9.95E-01 | 0.034 | 0.033 | 1.04 | 0.75 | -1.44 | 1.58 | 1.43E-03 | MYO16                                             | intronic       |
| 8  | 61540328  | G | A | rs2625445              | 5.93E-05 | 0.191 | 0.242 | 0.74 | 0.63 | -0.86 | 5.14E-01 | 0.216 | 0.225 | 0.95 | 0.82 | -1.09 | 0.84 | 1.44E-03 | RAB2A(dist=4125), CHD7(dist=50996)                | intergenic     |
| 18 | 64915395  | A | G | rs28842796             | 5.28E-01 | 0.044 | 0.040 | 1.09 | 0.8  | -1.48 | 5.76E-05 | 0.067 | 0.046 | 1.48 | 1.16 | -1.89 | 1.49 | 1.44E-03 | MIR5011(dist=166472), DSEL(dist=258424)           | intergenic     |
| 6  | 33983640  | T | C | rs6457754              | 5.73E-01 | 0.504 | 0.497 | 0.97 | 0.86 | -1.1  | 5.81E-05 | 0.509 | 0.429 | 1.38 | 1.23 | -1.55 | 1.16 | 1.44E-03 | MIR1275(dist=15812), GRM4(dist=2780)              | intergenic     |
| 7  | 14222768  | C | T | rs74883414             | 4.35E-01 | 0.088 | 0.088 | 1.01 | 0.81 | -1.25 | 8.13E-06 | 0.085 | 0.059 | 1.48 | 1.19 | -1.84 | 1.40 | 1.45E-03 | DGKB                                              | intronic       |
| 5  | 75934732  | A | G | rs114790677            | 4.34E-05 | 0.035 | 0.065 | 0.52 | 0.38 | -0.71 | 8.87E-01 | 0.045 | 0.043 | 1.05 | 0.79 | -1.4  | 0.70 | 1.46E-03 | IQGAP2                                            | intronic       |
| 6  | 4967652   | C | G | rs9504295              | 3.24E-06 | 0.105 | 0.064 | 1.72 | 1.38 | -2.15 | 9.80E-01 | 0.085 | 0.087 | 0.97 | 0.78 | -1.19 | 1.33 | 1.46E-03 | CDYL(dist=11874), RPP40(dist=27628)               | intergenic     |
| 14 | 30744958  | T | C | rs77687729             | 6.20E-01 | 0.021 | 0.025 | 0.87 | 0.57 | -1.32 | 5.38E-05 | 0.008 | 0.023 | 0.35 | 0.19 | -0.64 | 0.59 | 1.46E-03 | PRKD1(dist=348059), G2E3(dist=283371)             | intergenic     |
| 8  | 118003425 | A | T | rs184263437            | 1.14E-05 | 0.049 | 0.027 | 1.86 | 1.35 | -2.55 | 8.94E-01 | 0.028 | 0.026 | 1.09 | 0.76 | -1.55 | 1.56 | 1.47E-03 | SLC30A8                                           | intronic       |
| 17 | 13575708  | T | C | rs9892382              | 4.47E-01 | 0.478 | 0.470 | 1.03 | 0.91 | -1.17 | 6.03E-05 | 0.491 | 0.441 | 1.22 | 1.09 | -1.37 | 1.16 | 1.47E-03 | HS3ST3A1(dist=70449), CDRT15P1(dist=352107)       | intergenic     |
| 8  | 118002467 | T | C | rs115789225            | 1.17E-05 | 0.049 | 0.027 | 1.86 | 1.35 | -2.56 | 8.91E-01 | 0.028 | 0.026 | 1.09 | 0.76 | -1.55 | 1.56 | 1.47E-03 | SLC30A8                                           | intronic       |
| 13 | 51070197  | A | C | rs185623258            | 8.17E-01 | 0.035 | 0.033 | 1.06 | 0.75 | -1.49 | 2.85E-05 | 0.048 | 0.032 | 1.55 | 1.17 | -2.06 | 1.71 | 1.48E-03 | DLEU1                                             | ncRNA_intronic |
| 5  | 75937479  | G | C | rs6873976              | 5.24E-05 | 0.035 | 0.065 | 0.52 | 0.38 | -0.71 | 8.56E-01 | 0.050 | 0.048 | 1.06 | 0.81 | -1.38 | 0.71 | 1.48E-03 | IQGAP2                                            | intronic       |
| 3  | 63959465  | C | T | rs62252368             | 5.53E-01 | 0.195 | 0.204 | 0.94 | 0.81 | -1.1  | 8.95E-07 | 0.245 | 0.190 | 1.38 | 1.2  | -1.59 | 1.20 | 1.49E-03 | ATXN7                                             | intronic       |
| 6  | 29415862  | T | C | rs6911542              | 5.79E-01 | 0.112 | 0.109 | 1.04 | 0.85 | -1.26 | 6.26E-05 | 0.134 | 0.093 | 1.52 | 1.27 | -1.81 | 1.27 | 1.49E-03 | OR10C1(dist=7108), OR2H1(dist=10368)              | intergenic     |
| 8  | 117967975 | T | G | rs141796722            | 3.24E-06 | 0.049 | 0.025 | 1.98 | 1.43 | -2.74 | 9.02E-01 | 0.029 | 0.028 | 1.04 | 0.73 | -1.48 | 1.56 | 1.50E-03 | SLC30A8                                           | intronic       |
| 6  | 33985149  | T | C | rs9461943              | 6.34E-01 | 0.487 | 0.495 | 0.97 | 0.85 | -1.09 | 4.47E-05 | 0.505 | 0.425 | 1.38 | 1.23 | -1.55 | 1.16 | 1.51E-03 | MIR1275(dist=17321), GRM4(dist=1271)              | intergenic     |
| 12 | 93873085  | A | G | rs141853609            | 4.19E-05 | 0.047 | 0.027 | 1.81 | 1.3  | -2.5  | 5.78E-01 | 0.034 | 0.029 | 1.17 | 0.84 | -1.62 | 1.55 | 1.52E-03 | MRPL42                                            | intronic       |
| 21 | 16835352  | T | A | rs60773275             | 7.14E-01 | 0.421 | 0.438 | 0.93 | 0.82 | -1.06 | 2.98E-05 | 0.397 | 0.444 | 0.83 | 0.73 | -0.93 | 0.86 | 1.52E-03 | NRIP1(dist=398226), USP25(dist=266992)            | intergenic     |
| 5  | 75942625  | C | A | rs1501688              | 5.75E-05 | 0.035 | 0.064 | 0.52 | 0.38 | -0.72 | 8.40E-01 | 0.048 | 0.046 | 1.05 | 0.8  | -1.38 | 0.71 | 1.53E-03 | IQGAP2                                            | intronic       |
| 12 | 11429914  | C | A | rs61930621             | 4.07E-05 | 0.059 | 0.032 | 1.88 | 1.4  | -2.53 | 5.42E-01 | 0.049 | 0.049 | 1.00 | 0.76 | -1.31 | 1.46 | 1.54E-03 | PRB3(dist=7273), PRB4(dist=30101)                 | intergenic     |
| 19 | 11640570  | T | G | rs10418021             | 4.97E-05 | 0.400 | 0.434 | 1.15 | 1.01 | -1.3  | 5.22E-01 | 0.444 | 0.474 | 1.13 | 1.01 | -1.27 | 1.17 | 1.55E-03 | ECSIT                                             | upstream       |
| 5  | 104530580 | G | T | rs189988017            | 7.02E-01 | 0.021 | 0.023 | 0.92 | 0.6  | -1.41 | 2.72E-05 | 0.009 | 0.024 | 0.36 | 0.2  | -0.64 | 0.59 | 1.55E-03 | RAB9BP1(dist=94781), LOC102467213(dist=1620318)   | intergenic     |
| 21 | 16835276  | A | G | rs57117270             | 7.04E-01 | 0.421 | 0.438 | 0.93 | 0.82 | -1.06 | 3.25E-05 | 0.398 | 0.444 | 0.83 | 0.73 | -0.93 | 0.86 | 1.55E-03 | NRIP1(dist=398150), USP25(dist=267068)            | intergenic     |
| 10 | 48336123  | C | A | rs745048               | 1.29E-05 | 0.294 | 0.366 | 0.72 | 0.63 | -0.83 | 7.31E-01 | 0.274 | 0.272 | 1.01 | 0.89 | -1.15 | 0.83 | 1.55E-03 | ANXA8(dist=64755), ZNF488(dist=18966)             | intergenic     |
| 14 | 30717013  | C | T | rs115572041            | 7.04E-01 | 0.026 | 0.029 | 0.89 | 0.6  | -1.3  | 3.38E-05 | 0.009 | 0.026 | 0.35 | 0.19 | -0.62 | 0.62 | 1.56E-03 | PRKD1(dist=320114), G2E3(dist=311316)             | intergenic     |
| 12 | 4144400   | A | C | rs2532554              | 6.93E-01 | 0.282 | 0.297 | 0.93 | 0.81 | -1.07 | 5.40E-05 | 0.246 | 0.289 | 0.80 | 0.7  | -0.92 | 0.85 | 1.56E-03 | PARP11(dist=161786), CCND2-AS1(dist=213533)       | intergenic     |
| 4  | 58256071  | A | G | rs139393118            | 5.72E-01 | 0.036 | 0.034 | 1.06 | 0.76 | -1.47 | 3.43E-05 | 0.043 | 0.023 | 1.92 | 1.4  | -2.62 | 1.53 | 1.57E-03 | IGFBP7-AS1(dist=184606), LOC101928851(dist=35967) | intergenic     |
| 6  | 92863416  | C | A | rs76901354             | 4.81E-05 | 0.042 | 0.022 | 1.93 | 1.36 | -2.74 | 7.01E-01 | 0.028 | 0.024 | 1.16 | 0.81 | -1.66 | 1.61 | 1.58E-03 | CASC6(dist=463270), EPHA7(dist=1086324)           | intergenic     |
| 7  | 20538382  | G | T | rs73072690             | 3.86E-05 | 0.179 | 0.237 | 0.70 | 0.6  | -0.82 | 6.12E-01 | 0.221 | 0.223 | 0.99 | 0.86 | -1.14 | 0.84 | 1.59E-03 | ITGB8(dist=83000), ABCB5(dist=116863)             | intergenic     |
| 8  | 61535125  | C | G | rs649634               | 5.94E-05 | 0.188 | 0.239 | 0.74 | 0.63 | -0.86 | 5.39E-01 | 0.214 | 0.223 | 0.95 | 0.82 | -1.09 | 0.84 | 1.59E-03 | RAB2A                                             | UTR3           |
| 5  | 83545768  | T | G | rs60528905             | 4.56E-01 | 0.079 | 0.077 | 1.03 | 0.82 | -1.29 | 6.12E-05 | 0.087 | 0.064 | 1.40 | 1.13 | -1.73 | 1.43 | 1.60E-03 | EDIL3                                             | intronic       |
| 19 | 7778963   | C | T | rs7254240              | 5.48E-05 | 0.525 | 0.483 | 0.85 | 0.75 | -0.96 | 5.43E-01 | 0.470 | 0.449 | 0.92 | 0.82 | -1.03 | 0.85 | 1.60E-03 |                                                   |                |

|    |           |   |   |                                   |          |       |       |      |             |          |       |       |      |             |      |          |                                               |                |
|----|-----------|---|---|-----------------------------------|----------|-------|-------|------|-------------|----------|-------|-------|------|-------------|------|----------|-----------------------------------------------|----------------|
| 2  | 48021379  | G | C | rs3136302                         | 6.05E-01 | 0.190 | 0.170 | 0.87 | 0.74 - 1.03 | 6.25E-05 | 0.229 | 0.198 | 0.83 | 0.72 - 0.96 | 0.82 | 1.69E-03 | MSH6                                          | intronic       |
| 2  | 47602789  | A | G | rs66617176                        | 9.06E-01 | 0.266 | 0.276 | 0.95 | 0.83 - 1.09 | 7.32E-06 | 0.225 | 0.271 | 0.78 | 0.68 - 0.9  | 0.85 | 1.69E-03 | EPCAM                                         | intronic       |
| 11 | 95994907  | C | T | rs76216526                        | 2.61E-06 | 0.043 | 0.023 | 1.91 | 1.35 - 2.69 | 5.19E-01 | 0.020 | 0.021 | 0.94 | 0.62 - 1.43 | 1.69 | 1.69E-03 | MAML2                                         | intronic       |
| 5  | 117732355 | C | A | rs79226776                        | 9.58E-01 | 0.071 | 0.074 | 0.96 | 0.75 - 1.21 | 6.83E-06 | 0.095 | 0.059 | 1.67 | 1.35 - 2.06 | 1.34 | 1.69E-03 | LOC101927280                                  | ncRNA_intronic |
| 9  | 38058424  | C | T | rs4878743                         | 7.69E-01 | 0.348 | 0.344 | 0.98 | 0.86 - 1.12 | 4.22E-05 | 0.376 | 0.321 | 0.79 | 0.7 - 0.89  | 0.86 | 1.69E-03 | SHB                                           | intronic       |
| 1  | 79181416  | A | G | rs1780747                         | 4.27E-05 | 0.296 | 0.235 | 1.37 | 1.19 - 1.57 | 6.40E-01 | 0.281 | 0.282 | 0.99 | 0.87 - 1.13 | 1.18 | 1.70E-03 | IFI44(dist=51653), ADGRL4(dist=174033)        | intergenic     |
| 2  | 224781994 | A | G | rs73994436                        | 3.98E-06 | 0.051 | 0.026 | 2.00 | 1.45 - 2.75 | 6.37E-01 | 0.028 | 0.029 | 0.98 | 0.69 - 1.39 | 1.56 | 1.70E-03 | WDFY1                                         | intronic       |
| 9  | 36119789  | C | T | rs7032577                         | 6.23E-06 | 0.087 | 0.056 | 1.62 | 1.28 - 2.06 | 8.89E-01 | 0.066 | 0.061 | 1.09 | 0.86 - 1.38 | 1.34 | 1.71E-03 | RECK                                          | intronic       |
| 4  | 85375567  | C | T | rs763540                          | 7.66E-01 | 0.324 | 0.320 | 1.02 | 0.89 - 1.16 | 4.67E-05 | 0.359 | 0.302 | 1.29 | 1.14 - 1.46 | 1.16 | 1.71E-03 | LOC101928978(dist=155245), NKX6-1(dist=38869) | intergenic     |
| 3  | 63853423  | T | C | rs832192                          | 5.44E-01 | 0.156 | 0.168 | 1.09 | 0.92 - 1.29 | 6.27E-07 | 0.206 | 0.153 | 0.70 | 0.6 - 0.81  | 0.83 | 1.72E-03 | ATXN7                                         | intronic       |
| 10 | 53114079  | C | T | rs1189311                         | 7.03E-06 | 0.398 | 0.337 | 0.77 | 0.68 - 0.88 | 7.24E-01 | 0.369 | 0.365 | 0.98 | 0.87 - 1.11 | 0.84 | 1.72E-03 | PRKG1                                         | intronic       |
| 18 | 6559611   | A | C | rs16950267                        | 9.27E-01 | 0.114 | 0.120 | 0.94 | 0.78 - 1.14 | 1.12E-05 | 0.153 | 0.112 | 1.44 | 1.21 - 1.7  | 1.29 | 1.72E-03 | LINC01387                                     | ncRNA_intronic |
| 14 | 94370351  | A | T | rs4900204                         | 6.23E-01 | 0.071 | 0.064 | 0.91 | 0.71 - 1.16 | 3.62E-05 | 0.089 | 0.064 | 0.70 | 0.57 - 0.87 | 0.74 | 1.72E-03 | FAM181A-AS1                                   | downstream     |
| 1  | 1042378   | A | C | rs12754457                        | 6.17E-01 | 0.419 | 0.425 | 0.98 | 0.86 - 1.11 | 5.90E-05 | 0.465 | 0.398 | 1.32 | 1.17 - 1.48 | 1.16 | 1.73E-03 | C1orf159                                      | intronic       |
| 7  | 44325363  | G | T | rs34310058                        | 7.33E-01 | 0.094 | 0.084 | 1.14 | 0.92 - 1.41 | 6.37E-05 | 0.087 | 0.132 | 0.63 | 0.51 - 0.77 | 0.78 | 1.73E-03 | CAMK2B                                        | intronic       |
| 14 | 104967330 | G | A | rs116440731                       | 7.90E-01 | 0.070 | 0.071 | 1.00 | 0.78 - 1.27 | 1.38E-05 | 0.081 | 0.053 | 1.58 | 1.26 - 1.98 | 1.39 | 1.77E-03 | KIF26A(dist=320095), C14orf180(dist=78691)    | intergenic     |
| 17 | 14672157  | T | A | rs34117928                        | 6.66E-01 | 0.051 | 0.048 | 1.05 | 0.79 - 1.39 | 6.46E-05 | 0.092 | 0.066 | 1.43 | 1.16 - 1.76 | 1.37 | 1.77E-03 | HS3ST3B1(dist=419436), CDRT7(dist=262135)     | intergenic     |
| 4  | 189436696 | C | A | rs73875226                        | 3.11E-05 | 0.058 | 0.035 | 1.71 | 1.28 - 2.29 | 8.84E-01 | 0.038 | 0.035 | 1.10 | 0.81 - 1.49 | 1.47 | 1.77E-03 | LINC01060                                     | ncRNA_intronic |
| 5  | 75936590  | A | G | rs75188974                        | 5.40E-05 | 0.034 | 0.063 | 0.52 | 0.38 - 0.71 | 9.00E-01 | 0.045 | 0.042 | 1.05 | 0.79 - 1.4  | 0.71 | 1.77E-03 | IQGAP2                                        | intronic       |
| 6  | 26312002  | C | T | rs138064730                       | 6.33E-05 | 0.011 | 0.029 | 0.36 | 0.21 - 0.62 | 7.47E-01 | 0.023 | 0.023 | 1.02 | 0.69 - 1.5  | 0.58 | 1.78E-03 | HIST1H4H(dist=26275), BTN3A2(dist=53385)      | intergenic     |
| 11 | 95993748  | C | G | rs7934999                         | 2.82E-06 | 0.043 | 0.023 | 1.91 | 1.36 - 2.69 | 5.03E-01 | 0.020 | 0.021 | 0.94 | 0.62 - 1.43 | 1.68 | 1.78E-03 | MAML2                                         | intronic       |
| 3  | 63982670  | C | T | rs112674299                       | 5.29E-01 | 0.182 | 0.195 | 0.92 | 0.78 - 1.08 | 7.39E-07 | 0.236 | 0.181 | 1.40 | 1.22 - 1.61 | 1.20 | 1.79E-03 | ATXN7                                         | intronic       |
| 3  | 143032259 | G | A | rs79605349                        | 8.32E-01 | 0.031 | 0.031 | 1.02 | 0.72 - 1.46 | 1.51E-05 | 0.045 | 0.025 | 1.85 | 1.37 - 2.5  | 1.53 | 1.81E-03 | SLC9A9                                        | intronic       |
| 8  | 29186938  | T | C | rs28473549                        | 6.47E-01 | 0.134 | 0.133 | 1.01 | 0.84 - 1.21 | 1.70E-05 | 0.136 | 0.099 | 1.43 | 1.2 - 1.71  | 1.27 | 1.81E-03 | KIF13B(dist=66328), DUSP4(dist=3641)          | intergenic     |
| 18 | 10220851  | T | A | rs57472523                        | 5.98E-05 | 0.017 | 0.038 | 0.43 | 0.28 - 0.67 | 9.51E-01 | 0.032 | 0.031 | 1.04 | 0.75 - 1.46 | 0.62 | 1.81E-03 | VAPA(dist=260833), LINC01254(dist=184279)     | intergenic     |
| 9  | 205316    | C | T | rs13295177;rs386731354            | 4.53E-05 | 0.195 | 0.251 | 1.32 | 0.62 - 0.84 | 8.16E-01 | 0.211 | 0.202 | 1.06 | 0.91 - 1.22 | 0.82 | 1.83E-03 | CBWD1(dist=26241), C9orf66(dist=7792)         | intergenic     |
| 8  | 128415351 | T | C | rs7014039                         | 6.64E-01 | 0.085 | 0.092 | 0.92 | 0.74 - 1.15 | 6.42E-05 | 0.054 | 0.083 | 0.62 | 0.49 - 0.8  | 0.77 | 1.84E-03 | CASC8                                         | ncRNA_intronic |
| 13 | 70367678  | C | T | rs144386939                       | 7.63E-01 | 0.018 | 0.020 | 0.88 | 0.56 - 1.39 | 2.59E-05 | 0.041 | 0.023 | 1.80 | 1.32 - 2.47 | 1.75 | 1.84E-03 | KLHL1                                         | intronic       |
| 13 | 48802389  | C | G | rs74975473                        | 8.36E-01 | 0.064 | 0.064 | 1.00 | 0.77 - 1.28 | 1.71E-05 | 0.079 | 0.048 | 1.71 | 1.36 - 2.16 | 1.36 | 1.86E-03 | MED4(dist=133112), ITM2B(dist=4885)           | intergenic     |
| 12 | 84648765  | G | A | rs987150                          | 6.20E-05 | 0.245 | 0.191 | 1.38 | 1.19 - 1.6  | 5.76E-01 | 0.206 | 0.203 | 1.02 | 0.88 - 1.17 | 1.19 | 1.86E-03 | TMTC2(dist=1120698), SLC6A15(dist=604502)     | intergenic     |
| 21 | 34122295  | C | T | rs9981698                         | 4.38E-05 | 0.115 | 0.160 | 0.68 | 0.57 - 0.82 | 7.17E-01 | 0.139 | 0.140 | 1.00 | 0.84 - 1.18 | 0.81 | 1.88E-03 | PAXBP1                                        | intronic       |
| 3  | 61151781  | C | G | rs6801782                         | 5.36E-01 | 0.062 | 0.059 | 1.05 | 0.81 - 1.36 | 6.04E-05 | 0.070 | 0.045 | 1.59 | 1.25 - 2.02 | 1.38 | 1.89E-03 | FHIT                                          | intronic       |
| 18 | 27860196  | T | G | rs2960012                         | 9.72E-01 | 0.437 | 0.435 | 1.01 | 0.89 - 1.14 | 1.18E-05 | 0.370 | 0.427 | 0.79 | 0.7 - 0.89  | 0.86 | 1.89E-03 | NONE(dist=NONE), MIR302F(dist=18680)          | intergenic     |
| 2  | 103048157 | G | A | rs56331791                        | 7.71E-01 | 0.112 | 0.107 | 1.06 | 0.87 - 1.29 | 4.23E-05 | 0.091 | 0.136 | 0.63 | 0.52 - 0.77 | 0.80 | 1.92E-03 | IL18RAP                                       | intronic       |
| 17 | 14672018  | G | A | rs34555009                        | 7.47E-01 | 0.052 | 0.051 | 1.03 | 0.78 - 1.36 | 5.46E-05 | 0.095 | 0.068 | 1.43 | 1.16 - 1.75 | 1.37 | 1.95E-03 | HS3ST3B1(dist=419297), CDRT7(dist=262274)     | intergenic     |
| 15 | 67120717  | A | C | rs4776324                         | 8.04E-01 | 0.268 | 0.246 | 0.89 | 0.78 - 1.03 | 5.74E-05 | 0.313 | 0.276 | 0.84 | 0.74 - 0.95 | 0.85 | 1.98E-03 | SMAD6(dist=46380), SMAD3(dist=237478)         | intergenic     |
| 3  | 143093409 | A | G | rs116244008                       | 9.15E-01 | 0.071 | 0.074 | 0.96 | 0.76 - 1.22 | 8.56E-06 | 0.087 | 0.057 | 1.57 | 1.27 - 1.95 | 1.34 | 1.98E-03 | SLC9A9                                        | intronic       |
| 13 | 33872289  | T | C | rs7998857                         | 7.04E-01 | 0.216 | 0.221 | 1.03 | 0.88 - 1.19 | 5.91E-05 | 0.252 | 0.205 | 0.76 | 0.67 - 0.88 | 0.81 | 1.98E-03 | STARD13                                       | intronic       |
| 9  | 129347226 | A | G | rs35135990                        | 5.89E-05 | 0.259 | 0.298 | 1.21 | 1.05 - 1.39 | 6.03E-01 | 0.346 | 0.364 | 1.08 | 0.96 - 1.22 | 1.18 | 1.99E-03 | IMV12B(dist=77906), LMX1B(dist=29496)         | intergenic     |
| 15 | 61073700  | T | A | rs62002750                        | 9.84E-01 | 0.114 | 0.101 | 1.14 | 0.94 - 1.39 | 1.28E-05 | 0.145 | 0.118 | 1.27 | 1.07 - 1.5  | 1.26 | 1.99E-03 | RORA                                          | intronic       |
| 8  | 128415459 | A | C | rs73706719                        | 7.31E-01 | 0.087 | 0.093 | 0.93 | 0.75 - 1.16 | 3.73E-05 | 0.052 | 0.082 | 0.62 | 0.48 - 0.8  | 0.78 | 2.00E-03 | CASC8                                         | ncRNA_intronic |
| 2  | 179815641 | A | G | rs16866575                        | 6.23E-01 | 0.026 | 0.020 | 1.28 | 0.85 - 1.93 | 6.18E-05 | 0.041 | 0.029 | 1.43 | 1.05 - 1.94 | 1.71 | 2.00E-03 | CCDC141                                       | intronic       |
| 14 | 105005216 | C | T | rs4983595                         | 6.19E-01 | 0.492 | 0.496 | 0.98 | 0.87 - 1.11 | 3.49E-05 | 0.540 | 0.479 | 1.28 | 1.14 - 1.44 | 1.17 | 2.02E-03 | KIF26A(dist=357981), C14orf180(dist=40805)    | intergenic     |
| 7  | 109545649 | C | G | rs139670053                       | 1.62E-05 | 0.081 | 0.126 | 0.61 | 0.49 - 0.76 | 9.57E-01 | 0.119 | 0.115 | 1.04 | 0.87 - 1.25 | 0.78 | 2.04E-03 | C7orf66(dist=1021005), EIF3IP1(dist=53635)    | intergenic     |
| 10 | 15454414  | A | T | rs4497284                         | 9.34E-01 | 0.070 | 0.066 | 1.07 | 0.84 - 1.37 | 3.24E-05 | 0.091 | 0.064 | 1.47 | 1.19 - 1.81 | 1.33 | 2.05E-03 | FAM171A1(dist=41356), ITGA8(dist=101534)      | intergenic     |
| 4  | 85387480  | A | G | rs1822836                         | 8.45E-01 | 0.330 | 0.328 | 1.01 | 0.89 - 1.15 | 3.91E-05 | 0.363 | 0.306 | 1.29 | 1.15 - 1.46 | 1.16 | 2.06E-03 | LOC101928978(dist=167158), NKX6-1(dist=26956) | intergenic     |
| 13 | 27719526  | C | T | rs995424                          | 9.04E-06 | 0.540 | 0.460 | 1.38 | 1.22 - 1.56 | 8.80E-01 | 0.494 | 0.494 | 1.00 | 0.89 - 1.12 | 1.15 | 2.07E-03 | USP12-AS1                                     | ncRNA_intronic |
| 19 | 11641375  | C | T | rs8109248                         | 3.94E-05 | 0.433 | 0.469 | 1.16 | 1.02 - 1.31 | 6.28E-01 | 0.518 | 0.487 | 1.13 | 1.01 - 1.27 | 1.16 | 2.07E-03 | ECSI1T(dist=1388), CNN1(dist=8204)            | intergenic     |
| 10 | 15456585  | A | G | rs61842743                        | 9.26E-01 | 0.070 | 0.066 | 1.07 | 0.84 - 1.37 | 3.54E-05 | 0.090 | 0.063 | 1.47 | 1.19 - 1.81 | 1.33 | 2.08E-03 | FAM171A1(dist=43527), ITGA8(dist=99363)       | intergenic     |
| 10 | 15457052  | T | A | rs61842745                        | 9.18E-01 | 0.070 | 0.066 | 1.07 | 0.84 - 1.37 | 3.75E-05 | 0.090 | 0.063 | 1.47 | 1.19 - 1.81 | 1.33 | 2.09E-03 | FAM171A1(dist=43994), ITGA8(dist=98896)       | intergenic     |
| 9  | 38063602  | G | C | rs1928245                         | 8.04E-01 | 0.342 | 0.339 | 0.98 | 0.86 - 1.12 | 4.21E-05 | 0.375 | 0.320 | 0.79 | 0.7 - 0.89  | 0.86 | 2.09E-03 | SHB                                           | intronic       |
| 8  | 128425346 | T | G | rs56364999                        | 7.24E-01 | 0.088 | 0.093 | 0.93 | 0.75 - 1.16 | 5.55E-05 | 0.056 | 0.086 | 0.63 | 0.49 - 0.8  | 0.78 | 2.12E-03 | CASC8                                         | ncRNA_intronic |
| 8  | 128422983 | A | G | rs60626102                        | 7.14E-01 | 0.088 | 0.093 | 0.93 | 0.75 - 1.16 | 6.00E-05 | 0.055 | 0.085 | 0.63 | 0.49 - 0.8  | 0.78 | 2.14E-03 | CASC8                                         | ncRNA_intronic |
| 10 | 15453795  | A | G | rs61842741                        | 9.36E-01 | 0.070 | 0.066 | 1.07 | 0.84 - 1.37 | 3.51E-05 | 0.091 | 0.064 | 1.46 | 1.18 - 1.8  | 1.33 | 2.14E-03 | FAM171A1(dist=40737), ITGA8(dist=102153)      | intergenic     |
| 7  | 113530892 | C | T | rs4730602                         | 6.80E-01 | 0.383 | 0.391 | 1.03 | 0.91 - 1.17 | 2.35E-06 | 0.435 | 0.366 | 0.75 | 0.67 - 0.84 | 0.86 | 2.16E-03 | PPP1R3A                                       | intronic       |
| 10 | 54720506  | T | C | rs11003287                        | 8.58E-01 | 0.202 | 0.183 | 1.13 | 0.97 - 1.32 | 5.06E-05 | 0.279 | 0.247 | 1.18 | 1.03 - 1.34 | 1.23 | 2.19E-03 | MBL2(dist=189046), PCDH15(dist=842027)        | intergenic     |
| 12 | 114982603 | T | A | rs2434071;rs200725936;rs386766547 | 6.80E-01 | 0.402 | 0.393 | 1.04 | 0.91 - 1.17 | 3.03E-06 | 0.348 | 0.415 | 0.75 | 0.67 - 0.85 | 0.85 | 2.19E-03 | TBX5-AS1(dist=131966), TBX3(dist=125456)      | intergenic     |
| 3  | 30190848  | T | C | rs78559607                        | 9.43E-01 | 0.023 | 0.026 | 0.91 | 0.61 - 1.36 | 1.89E-05 | 0.048 | 0.027 | 1.82 | 1.36 - 2.44 | 1.55 | 2.20E-03 | RBMS3(dist=138962), TGFBR2(dist=457146)       | intergenic     |
| 9  | 77259356  | A | C | rs73650028                        | 8.46E-01 | 0.104 | 0.106 | 0.98 | 0.8 - 1.2   | 5.95E-05 | 0.129 | 0.091 | 1.49 | 1.24 - 1.78 | 1.26 | 2.21E-03 | RORB                                          | intronic       |

|    |           |   |   |                        |          |       |       |      |             |          |       |       |      |             |      |          |                                                |                |
|----|-----------|---|---|------------------------|----------|-------|-------|------|-------------|----------|-------|-------|------|-------------|------|----------|------------------------------------------------|----------------|
| 8  | 128417682 | T | C | rs73706745             | 7.14E-01 | 0.087 | 0.093 | 0.93 | 0.75 - 1.16 | 6.41E-05 | 0.055 | 0.085 | 0.63 | 0.49 - 0.8  | 0.78 | 2.22E-03 | CASC8                                          | ncRNA_intronic |
| 2  | 224697209 | A | G | rs17244479             | 3.57E-05 | 0.464 | 0.398 | 1.31 | 1.15 - 1.48 | 7.23E-01 | 0.451 | 0.446 | 1.02 | 0.91 - 1.15 | 1.16 | 2.22E-03 | AP1S3                                          | intronic       |
| 14 | 30711393  | T | G | rs13379175             | 7.71E-01 | 0.025 | 0.028 | 0.90 | 0.61 - 1.32 | 3.62E-05 | 0.009 | 0.026 | 0.35 | 0.19 - 0.62 | 0.64 | 2.23E-03 | PRKD1(dist=314494), G2E3(dist=316936)          | intergenic     |
| 6  | 9773987   | C | T | rs141639596            | 3.96E-05 | 0.064 | 0.043 | 1.54 | 1.17 - 2.02 | 9.99E-01 | 0.046 | 0.044 | 1.05 | 0.79 - 1.39 | 1.53 | 2.24E-03 | LOC100506207(dist=988309), TFAP2A(dist=622929) | intergenic     |
| 9  | 36128501  | A | T | rs76008883             | 3.50E-06 | 0.091 | 0.058 | 1.62 | 1.28 - 2.05 | 9.62E-01 | 0.067 | 0.063 | 1.07 | 0.84 - 1.35 | 1.33 | 2.24E-03 | RECK(dist=4049), GLIPR2(dist=8032)             | intergenic     |
| 2  | 182172593 | A | G | rs12613489             | 8.31E-01 | 0.056 | 0.053 | 1.07 | 0.81 - 1.4  | 3.41E-05 | 0.090 | 0.064 | 1.46 | 1.18 - 1.8  | 1.36 | 2.24E-03 | LOC101927156                                   | ncRNA_intronic |
| 8  | 29192417  | C | T | rs74690328             | 6.66E-01 | 0.132 | 0.131 | 1.01 | 0.84 - 1.21 | 2.68E-05 | 0.132 | 0.096 | 1.42 | 1.19 - 1.7  | 1.27 | 2.25E-03 | DUSP4                                          | UTR3           |
| 8  | 128417034 | C | A | rs57497300             | 7.15E-01 | 0.087 | 0.093 | 0.93 | 0.75 - 1.16 | 6.48E-05 | 0.055 | 0.085 | 0.63 | 0.49 - 0.8  | 0.78 | 2.25E-03 | CASC8                                          | ncRNA_intronic |
| 9  | 36128163  | C | G | rs78349723             | 3.51E-06 | 0.091 | 0.058 | 1.62 | 1.28 - 2.05 | 9.62E-01 | 0.067 | 0.063 | 1.07 | 0.84 - 1.35 | 1.33 | 2.25E-03 | RECK(dist=3711), GLIPR2(dist=8370)             | intergenic     |
| 3  | 177217610 | C | G | rs144640636            | 3.10E-05 | 0.043 | 0.026 | 1.68 | 1.2 - 2.34  | 7.76E-01 | 0.032 | 0.030 | 1.07 | 0.77 - 1.5  | 1.61 | 2.26E-03 | LINC00578                                      | ncRNA_intronic |
| 7  | 19186465  | C | T | rs10257807             | 7.77E-01 | 0.073 | 0.073 | 1.00 | 0.79 - 1.27 | 6.34E-06 | 0.113 | 0.079 | 1.49 | 1.23 - 1.81 | 1.32 | 2.28E-03 | FERD3L(dist=1421), TWISTNB(dist=548620)        | intergenic     |
| 13 | 42988924  | A | G | rs7327510              | 5.31E-05 | 0.323 | 0.377 | 1.27 | 1.12 - 1.45 | 6.28E-01 | 0.346 | 0.362 | 1.08 | 0.95 - 1.22 | 1.16 | 2.29E-03 | AKAP11(dist=91521), TNFSF11(dist=147948)       | intergenic     |
| 3  | 63854445  | C | T | rs832193               | 3.92E-01 | 0.161 | 0.174 | 1.10 | 0.93 - 1.3  | 3.02E-07 | 0.213 | 0.159 | 0.70 | 0.6 - 0.81  | 0.83 | 2.30E-03 | ATXN7                                          | intronic       |
| 8  | 128413978 | A | G | rs7008058              | 7.32E-01 | 0.087 | 0.093 | 0.93 | 0.75 - 1.16 | 5.69E-05 | 0.054 | 0.083 | 0.62 | 0.48 - 0.8  | 0.78 | 2.31E-03 | CCAT2                                          | ncRNA_exonic   |
| 3  | 191960452 | A | T | rs10470541             | 8.81E-01 | 0.467 | 0.471 | 0.98 | 0.87 - 1.11 | 3.21E-05 | 0.500 | 0.433 | 1.31 | 1.17 - 1.47 | 1.15 | 2.32E-03 | FGF12-AS1                                      | ncRNA_intronic |
| 2  | 47611644  | T | C | rs4953498              | 9.02E-01 | 0.240 | 0.247 | 0.96 | 0.83 - 1.11 | 4.41E-06 | 0.190 | 0.236 | 0.76 | 0.66 - 0.88 | 0.85 | 2.33E-03 | EPCAM                                          | intronic       |
| 10 | 70209585  | G | A | rs59391479;rs188115109 | 9.11E-01 | 0.024 | 0.026 | 0.92 | 0.62 - 1.37 | 2.88E-05 | 0.035 | 0.020 | 1.74 | 1.24 - 2.44 | 1.77 | 2.34E-03 | DNA2                                           | intronic       |
| 18 | 4912149   | G | A | rs58670697             | 6.23E-01 | 0.058 | 0.058 | 1.01 | 0.77 - 1.31 | 6.34E-05 | 0.074 | 0.051 | 1.50 | 1.19 - 1.89 | 1.42 | 2.34E-03 | DLGAP1(dist=456883), C18orf42(dist=231523)     | intergenic     |
| 15 | 61073802  | C | G | rs17270446             | 9.95E-01 | 0.113 | 0.101 | 1.14 | 0.93 - 1.39 | 1.55E-05 | 0.143 | 0.116 | 1.27 | 1.07 - 1.51 | 1.26 | 2.35E-03 | RORA                                           | intronic       |
| 8  | 128411944 | T | C | rs73706714             | 7.33E-01 | 0.088 | 0.093 | 0.94 | 0.75 - 1.16 | 5.78E-05 | 0.054 | 0.083 | 0.63 | 0.49 - 0.8  | 0.78 | 2.36E-03 | CASC8                                          | ncRNA_intronic |
| 8  | 128414486 | T | G | rs73706718             | 7.34E-01 | 0.087 | 0.093 | 0.93 | 0.75 - 1.16 | 5.86E-05 | 0.054 | 0.083 | 0.62 | 0.48 - 0.8  | 0.78 | 2.36E-03 | CASC8                                          | ncRNA_intronic |
| 8  | 128411855 | A | G | rs73706713             | 7.33E-01 | 0.088 | 0.093 | 0.94 | 0.75 - 1.16 | 5.81E-05 | 0.054 | 0.083 | 0.63 | 0.49 - 0.81 | 0.78 | 2.36E-03 | CASC8                                          | ncRNA_intronic |
| 8  | 5906722   | G | A | rs74354544             | 5.48E-05 | 0.063 | 0.033 | 2.00 | 1.5 - 2.67  | 5.42E-01 | 0.050 | 0.054 | 0.92 | 0.7 - 1.2   | 1.43 | 2.37E-03 | CSMD1(dist=1054394), LOC100287015(dist=354355) | intergenic     |
| 8  | 29188937  | G | A | rs7812684              | 7.58E-01 | 0.130 | 0.131 | 0.99 | 0.82 - 1.19 | 2.92E-05 | 0.132 | 0.097 | 1.43 | 1.19 - 1.7  | 1.27 | 2.37E-03 | KIF13B(dist=68327), DUSP4(dist=1642)           | intergenic     |
| 5  | 31774207  | G | A | rs73058460             | 4.64E-05 | 0.027 | 0.054 | 0.49 | 0.35 - 0.69 | 7.76E-01 | 0.043 | 0.043 | 1.02 | 0.76 - 1.35 | 0.69 | 2.38E-03 | C5orf22(dist=219042), PDZD2(dist=24824)        | intergenic     |
| 3  | 197673063 | C | T | rs148440303            | 8.75E-01 | 0.034 | 0.034 | 0.99 | 0.7 - 1.39  | 3.60E-05 | 0.048 | 0.029 | 1.68 | 1.26 - 2.24 | 1.57 | 2.39E-03 | IQCC                                           | intronic       |
| 7  | 150986560 | A | T | rs10234101             | 4.83E-05 | 0.167 | 0.134 | 1.30 | 1.09 - 1.54 | 8.56E-01 | 0.134 | 0.127 | 1.07 | 0.9 - 1.27  | 1.26 | 2.39E-03 | SMARCD3(dist=12329), NUB1(dist=52287)          | intergenic     |
| 3  | 57072645  | T | A | rs115864725            | 4.10E-06 | 0.069 | 0.043 | 1.63 | 1.25 - 2.12 | 7.39E-01 | 0.048 | 0.047 | 1.02 | 0.77 - 1.34 | 1.41 | 2.39E-03 | ARHGFE3                                        | intronic       |
| 8  | 61521867  | A | G | rs610455               | 6.29E-05 | 0.182 | 0.233 | 0.73 | 0.62 - 0.85 | 6.58E-01 | 0.207 | 0.213 | 0.97 | 0.84 - 1.12 | 0.84 | 2.40E-03 | RAB2A                                          | intronic       |
| 1  | 56872357  | C | T | rs2991265              | 8.98E-01 | 0.367 | 0.362 | 1.02 | 0.9 - 1.16  | 1.47E-05 | 0.428 | 0.376 | 1.24 | 1.1 - 1.4   | 1.16 | 2.43E-03 | MIR4422(dist=1180961), PPAP2B(dist=88062)      | intergenic     |
| 13 | 100447200 | G | A | rs9582345              | 8.66E-01 | 0.403 | 0.418 | 1.07 | 0.94 - 1.21 | 3.30E-05 | 0.355 | 0.400 | 1.21 | 1.07 - 1.37 | 1.16 | 2.44E-03 | LOC101927437                                   | ncRNA_intronic |
| 8  | 128415313 | A | G | rs6993583              | 7.32E-01 | 0.087 | 0.093 | 0.93 | 0.75 - 1.16 | 6.40E-05 | 0.054 | 0.083 | 0.62 | 0.49 - 0.8  | 0.78 | 2.45E-03 | CASC8                                          | ncRNA_intronic |
| 20 | 55447299  | T | C | rs4811771              | 6.84E-01 | 0.449 | 0.441 | 0.97 | 0.85 - 1.1  | 5.43E-05 | 0.515 | 0.479 | 0.86 | 0.77 - 0.97 | 0.83 | 2.45E-03 | TFAP2C(dist=232961), BMP7(dist=296510)         | intergenic     |
| 6  | 9775448   | T | C | rs142815497            | 4.74E-05 | 0.064 | 0.043 | 1.53 | 1.17 - 2.01 | 9.99E-01 | 0.046 | 0.044 | 1.05 | 0.79 - 1.39 | 1.52 | 2.47E-03 | LOC100506207(dist=989770), TFAP2A(dist=621468) | intergenic     |
| 8  | 128410814 | G | A | rs73706712             | 7.37E-01 | 0.088 | 0.094 | 0.94 | 0.75 - 1.16 | 6.14E-05 | 0.054 | 0.083 | 0.63 | 0.49 - 0.81 | 0.78 | 2.49E-03 | CASC8                                          | ncRNA_intronic |
| 9  | 36126139  | G | A | rs57312897             | 4.68E-06 | 0.088 | 0.056 | 1.63 | 1.29 - 2.07 | 9.79E-01 | 0.065 | 0.061 | 1.07 | 0.84 - 1.36 | 1.33 | 2.49E-03 | RECK(dist=1687), GLIPR2(dist=10394)            | intergenic     |
| 11 | 95994921  | G | T | rs114422211            | 1.44E-05 | 0.044 | 0.025 | 1.78 | 1.27 - 2.49 | 6.37E-01 | 0.021 | 0.022 | 0.98 | 0.65 - 1.46 | 1.65 | 2.50E-03 | MAML2                                          | intronic       |
| 14 | 76929557  | T | G | rs57238463             | 1.56E-05 | 0.089 | 0.057 | 1.61 | 1.27 - 2.04 | 9.74E-01 | 0.068 | 0.068 | 1.01 | 0.8 - 1.27  | 1.35 | 2.52E-03 | ESRRB                                          | intronic       |
| 7  | 3327994   | G | C | rs1473658              | 8.10E-01 | 0.329 | 0.327 | 1.01 | 0.88 - 1.15 | 5.53E-05 | 0.388 | 0.330 | 1.29 | 1.14 - 1.45 | 1.15 | 2.56E-03 | LOC100129603(dist=129788), SDK1(dist=13086)    | intergenic     |
| 12 | 11398093  | A | T | rs55982477             | 2.54E-05 | 0.069 | 0.039 | 1.85 | 1.41 - 2.42 | 7.68E-01 | 0.054 | 0.057 | 0.96 | 0.74 - 1.24 | 1.39 | 2.59E-03 | TAS2R42(dist=58550), PRB3(dist=20754)          | intergenic     |
| 8  | 128410060 | T | G | rs73706711             | 7.41E-01 | 0.088 | 0.094 | 0.94 | 0.76 - 1.16 | 6.47E-05 | 0.054 | 0.083 | 0.63 | 0.49 - 0.81 | 0.78 | 2.60E-03 | CASC8                                          | ncRNA_intronic |
| 10 | 34408467  | G | A | rs12264982             | 1.41E-05 | 0.225 | 0.298 | 0.68 | 0.59 - 0.79 | 7.17E-01 | 0.241 | 0.236 | 1.03 | 0.89 - 1.18 | 0.84 | 2.62E-03 | PARD3                                          | intronic       |
| 19 | 36652198  | T | C | rs114667815            | 8.37E-01 | 0.145 | 0.151 | 0.95 | 0.8 - 1.13  | 4.80E-05 | 0.166 | 0.126 | 1.38 | 1.18 - 1.63 | 1.27 | 2.64E-03 | COX7A1(dist=8427), ZNF565(dist=20764)          | intergenic     |
| 6  | 167213934 | A | G | rs4710104              | 3.16E-05 | 0.083 | 0.128 | 0.62 | 0.5 - 0.77  | 9.17E-01 | 0.106 | 0.103 | 1.03 | 0.85 - 1.25 | 0.80 | 2.65E-03 | RPS6KA2                                        | intronic       |
| 18 | 27098396  | C | A | rs138129352            | 9.03E-01 | 0.030 | 0.033 | 0.93 | 0.65 - 1.33 | 2.09E-06 | 0.040 | 0.021 | 1.99 | 1.44 - 2.75 | 1.58 | 2.65E-03 | CDH2(dist=1340951), MIR302F(dist=780480)       | intergenic     |
| 8  | 38817163  | T | A | rs73674664             | 7.28E-01 | 0.071 | 0.078 | 0.89 | 0.71 - 1.14 | 4.40E-06 | 0.108 | 0.069 | 1.63 | 1.34 - 1.98 | 1.31 | 2.66E-03 | PLEKHA2                                        | intronic       |
| 3  | 143060882 | A | G | rs116732809            | 6.29E-01 | 0.027 | 0.027 | 1.04 | 0.71 - 1.52 | 4.37E-05 | 0.035 | 0.020 | 1.78 | 1.27 - 2.49 | 1.61 | 2.67E-03 | SLC9A9                                         | intronic       |
| 5  | 117735755 | C | A | rs80144360             | 8.51E-01 | 0.058 | 0.062 | 0.92 | 0.71 - 1.2  | 7.09E-06 | 0.087 | 0.054 | 1.67 | 1.34 - 2.07 | 1.36 | 2.68E-03 | LOC101927280                                   | ncRNA_intronic |
| 17 | 48330522  | G | A | rs55678318             | 5.11E-05 | 0.098 | 0.057 | 1.78 | 1.41 - 2.23 | 7.70E-01 | 0.109 | 0.117 | 0.93 | 0.77 - 1.12 | 1.31 | 2.70E-03 | LOC101927230(dist=37741), TMEM92(dist=18245)   | intergenic     |
| 8  | 127606044 | C | G | rs12544179             | 9.10E-01 | 0.101 | 0.086 | 1.19 | 0.97 - 1.47 | 3.80E-06 | 0.170 | 0.148 | 1.17 | 1 - 1.37    | 1.30 | 2.72E-03 | FAM84B(dist=35333), PCAT1(dist=419355)         | intergenic     |
| 6  | 4975973   | T | C | rs11751420             | 1.20E-05 | 0.092 | 0.054 | 1.78 | 1.41 - 2.25 | 9.90E-01 | 0.076 | 0.078 | 0.96 | 0.77 - 1.2  | 1.32 | 2.74E-03 | CDDL1(dist=20195), RPP40(dist=19307)           | intergenic     |
| 19 | 11628467  | G | A | rs6511735              | 4.94E-05 | 0.383 | 0.415 | 1.14 | 1.01 - 1.3  | 6.85E-01 | 0.433 | 0.462 | 1.12 | 1 - 1.26    | 1.16 | 2.75E-03 | ECSIT                                          | intronic       |
| 8  | 18429704  | A | G | rs77512358             | 9.42E-01 | 0.025 | 0.026 | 0.95 | 0.64 - 1.41 | 3.70E-05 | 0.044 | 0.023 | 1.97 | 1.44 - 2.67 | 1.56 | 2.75E-03 | PSD3                                           | intronic       |
| 8  | 38820108  | A | G | rs73674666             | 9.20E-01 | 0.079 | 0.086 | 0.92 | 0.74 - 1.16 | 1.55E-05 | 0.116 | 0.077 | 1.56 | 1.29 - 1.89 | 1.30 | 2.75E-03 | PLEKHA2                                        | intronic       |
| 6  | 4975191   | C | A | rs9504298              | 1.26E-05 | 0.091 | 0.053 | 1.78 | 1.41 - 2.25 | 9.83E-01 | 0.075 | 0.078 | 0.97 | 0.77 - 1.2  | 1.32 | 2.78E-03 | CDDL1(dist=19413), RPP40(dist=20089)           | intergenic     |
| 3  | 30197425  | T | C | rs7649408              | 9.81E-01 | 0.024 | 0.026 | 0.92 | 0.62 - 1.37 | 3.74E-05 | 0.049 | 0.028 | 1.78 | 1.33 - 2.37 | 1.53 | 2.79E-03 | RBMS3(dist=145539), TGFB2(dist=450569)         | intergenic     |
| 2  | 224788479 | A | G | rs188427327            | 6.17E-05 | 0.055 | 0.032 | 1.74 | 1.29 - 2.35 | 9.65E-01 | 0.038 | 0.036 | 1.07 | 0.78 - 1.45 | 1.47 | 2.81E-03 | WDFY1                                          | intronic       |
| 8  | 61407796  | A | G | rs10957138             | 5.79E-05 | 0.185 | 0.236 | 0.73 | 0.63 - 0.86 | 6.74E-01 | 0.216 | 0.222 | 0.96 | 0.84 - 1.11 | 0.85 | 2.82E-03 | LINC01301(dist=81419), RAB2A(dist=21673)       | intergenic     |
| 10 | 124909482 | C | G | rs145218772            | 1.06E-06 | 0.055 | 0.033 | 1.69 | 1.26 - 2.28 | 8.06E-01 | 0.029 | 0.029 | 1.02 | 0.72 - 1.44 | 1.58 | 2.82E-03 | HMX2                                           | exonic         |
| 2  | 203484624 |   |   |                        |          |       |       |      |             |          |       |       |      |             |      |          |                                                |                |

|    |           |   |   |             |          |       |       |      |      |       |          |       |       |      |      |       |      |          |                                                     |                |
|----|-----------|---|---|-------------|----------|-------|-------|------|------|-------|----------|-------|-------|------|------|-------|------|----------|-----------------------------------------------------|----------------|
| 14 | 30714609  | A | G | rs75297083  | 8.30E-01 | 0.026 | 0.028 | 0.91 | 0.62 | -1.34 | 3.37E-05 | 0.009 | 0.026 | 0.35 | 0.19 | -0.62 | 0.65 | 2.83E-03 | PRKD1(dist=317710), G2E3(dist=313720)               | intergenic     |
| 14 | 30728407  | C | T | rs114798264 | 8.20E-01 | 0.026 | 0.029 | 0.91 | 0.62 | -1.34 | 3.36E-05 | 0.009 | 0.025 | 0.35 | 0.19 | -0.62 | 0.65 | 2.84E-03 | PRKD1(dist=331508), G2E3(dist=299922)               | intergenic     |
| 14 | 30729067  | C | A | rs10142631  | 8.18E-01 | 0.026 | 0.029 | 0.91 | 0.62 | -1.34 | 3.38E-05 | 0.009 | 0.025 | 0.35 | 0.19 | -0.62 | 0.65 | 2.84E-03 | PRKD1(dist=332168), G2E3(dist=299262)               | intergenic     |
| 8  | 117954279 | A | G | rs147650186 | 7.69E-06 | 0.047 | 0.025 | 1.92 | 1.38 | -2.67 | 8.62E-01 | 0.028 | 0.027 | 1.03 | 0.72 | -1.48 | 1.54 | 2.84E-03 | AARD                                                | intronic       |
| 14 | 30728046  | A | G | rs116173027 | 8.20E-01 | 0.026 | 0.029 | 0.91 | 0.62 | -1.34 | 3.37E-05 | 0.009 | 0.025 | 0.35 | 0.19 | -0.62 | 0.65 | 2.84E-03 | PRKD1(dist=331147), G2E3(dist=300283)               | intergenic     |
| 8  | 29191224  | T | G | rs10100467  | 7.01E-01 | 0.133 | 0.123 | 1.00 | 0.83 | -1.2  | 2.86E-05 | 0.132 | 0.097 | 1.43 | 1.19 | -1.7  | 1.25 | 2.86E-03 | DUSP4                                               | UTR3           |
| 14 | 30719964  | G | A | rs115604555 | 8.33E-01 | 0.026 | 0.029 | 0.92 | 0.62 | -1.34 | 3.27E-05 | 0.009 | 0.026 | 0.35 | 0.2  | -0.62 | 0.65 | 2.86E-03 | PRKD1(dist=323065), G2E3(dist=308365)               | intergenic     |
| 14 | 30726501  | G | T | rs10133400  | 8.24E-01 | 0.026 | 0.029 | 0.91 | 0.62 | -1.34 | 3.36E-05 | 0.009 | 0.025 | 0.35 | 0.19 | -0.62 | 0.65 | 2.86E-03 | PRKD1(dist=329602), G2E3(dist=301828)               | intergenic     |
| 14 | 30725438  | G | A | rs28771167  | 8.25E-01 | 0.026 | 0.029 | 0.91 | 0.62 | -1.34 | 3.37E-05 | 0.009 | 0.025 | 0.35 | 0.19 | -0.62 | 0.65 | 2.87E-03 | PRKD1(dist=328539), G2E3(dist=302891)               | intergenic     |
| 9  | 36129608  | G | A | rs111599955 | 8.07E-06 | 0.109 | 0.075 | 1.51 | 1.22 | -1.86 | 9.77E-01 | 0.088 | 0.083 | 1.07 | 0.87 | -1.31 | 1.28 | 2.88E-03 | RECK(dist=5156), GLIPR2(dist=6925)                  | intergenic     |
| 8  | 29190157  | C | A | rs115432029 | 7.02E-01 | 0.133 | 0.133 | 1.00 | 0.83 | -1.2  | 2.86E-05 | 0.132 | 0.097 | 1.43 | 1.19 | -1.7  | 1.25 | 2.89E-03 | DUSP4                                               | downstream     |
| 18 | 4845506   | A | G | rs4239324   | 7.28E-01 | 0.117 | 0.118 | 1.01 | 0.83 | -1.22 | 3.24E-05 | 0.141 | 0.105 | 0.71 | 0.6  | -0.84 | 0.80 | 2.90E-03 | DLGAP1(dist=390240), C18orf42(dist=298166)          | intergenic     |
| 14 | 26621962  | G | A | rs17568297  | 9.03E-01 | 0.126 | 0.123 | 1.03 | 0.85 | -1.24 | 6.42E-05 | 0.161 | 0.126 | 1.34 | 1.14 | -1.57 | 1.23 | 2.90E-03 | STXBP6(dist=1102459), NOVA1(dist=293127)            | intergenic     |
| 8  | 29189976  | A | C | rs147902826 | 7.03E-01 | 0.133 | 0.133 | 1.00 | 0.83 | -1.2  | 2.87E-05 | 0.132 | 0.097 | 1.43 | 1.19 | -1.7  | 1.25 | 2.91E-03 | DUSP4                                               | downstream     |
| 14 | 30721383  | T | C | rs28753678  | 8.32E-01 | 0.026 | 0.029 | 0.91 | 0.62 | -1.34 | 3.38E-05 | 0.009 | 0.025 | 0.35 | 0.19 | -0.62 | 0.65 | 2.91E-03 | PRKD1(dist=324484), G2E3(dist=306946)               | intergenic     |
| 14 | 30721097  | T | C | rs10151742  | 8.33E-01 | 0.026 | 0.029 | 0.92 | 0.62 | -1.34 | 3.37E-05 | 0.009 | 0.025 | 0.35 | 0.19 | -0.62 | 0.65 | 2.91E-03 | PRKD1(dist=324198), G2E3(dist=307232)               | intergenic     |
| 2  | 176951393 | A | G | rs11888176  | 5.73E-01 | 0.038 | 0.036 | 1.07 | 0.77 | -1.48 | 6.44E-05 | 0.041 | 0.023 | 1.84 | 1.34 | -2.52 | 1.52 | 2.92E-03 | EVX2(dist=2703), HOXD13(dist=6139)                  | intergenic     |
| 8  | 61397865  | T | A | rs7842105   | 5.14E-05 | 0.185 | 0.237 | 0.73 | 0.63 | -0.85 | 7.05E-01 | 0.217 | 0.223 | 0.97 | 0.84 | -1.11 | 0.85 | 2.94E-03 | LINC01301(dist=71488), RAB2A(dist=31604)            | intergenic     |
| 14 | 105005057 | A | G | rs7150832   | 8.77E-01 | 0.466 | 0.476 | 0.96 | 0.85 | -1.09 | 3.39E-05 | 0.527 | 0.466 | 1.27 | 1.13 | -1.43 | 1.17 | 2.94E-03 | KIF26A(dist=357822), C14orf180(dist=40964)          | intergenic     |
| 8  | 6790113   | G | A | rs72494229  | 1.75E-05 | 0.062 | 0.034 | 1.90 | 1.42 | -2.53 | 9.88E-01 | 0.045 | 0.051 | 0.88 | 0.67 | -1.17 | 1.49 | 2.95E-03 | DEFA6(dist=6515), DEFA4(dist=3229)                  | intergenic     |
| 2  | 58674393  | C | A | rs7558293   | 4.32E-05 | 0.216 | 0.260 | 1.28 | 1.1  | -1.48 | 7.70E-01 | 0.271 | 0.286 | 1.08 | 0.95 | -1.23 | 1.17 | 2.96E-03 | FANCL(dist=205878), LINC01122(dist=73495)           | intergenic     |
| 1  | 21793378  | T | C | rs60515836  | 6.19E-01 | 0.055 | 0.046 | 1.21 | 0.91 | -1.6  | 6.29E-05 | 0.065 | 0.051 | 1.29 | 1.01 | -1.64 | 1.47 | 2.97E-03 | NBPF3                                               | intronic       |
| 3  | 30106824  | T | C | rs6771356   | 8.18E-01 | 0.023 | 0.026 | 0.88 | 0.58 | -1.31 | 1.45E-05 | 0.041 | 0.022 | 1.88 | 1.37 | -2.58 | 1.62 | 2.98E-03 | RBMS3(dist=54938), TGFBR2(dist=541170)              | intergenic     |
| 19 | 16084711  | C | T | rs73509813  | 2.26E-05 | 0.300 | 0.247 | 1.31 | 1.14 | -1.51 | 7.91E-01 | 0.235 | 0.228 | 1.04 | 0.91 | -1.2  | 1.18 | 2.99E-03 | OR10H4(dist=23943), LINC00661(dist=41733)           | intergenic     |
| 19 | 16082374  | T | C | rs73509805  | 2.37E-05 | 0.300 | 0.247 | 1.31 | 1.14 | -1.5  | 8.15E-01 | 0.236 | 0.228 | 1.04 | 0.91 | -1.2  | 1.19 | 2.99E-03 | OR10H4(dist=21606), LINC00661(dist=44070)           | intergenic     |
| 19 | 50308893  | T | C | rs8101959   | 9.98E-01 | 0.423 | 0.420 | 1.01 | 0.89 | -1.15 | 3.40E-05 | 0.456 | 0.402 | 1.24 | 1.11 | -1.4  | 1.15 | 3.00E-03 | AP2A1                                               | intronic       |
| 3  | 64058240  | A | G | rs6797912   | 7.58E-01 | 0.195 | 0.202 | 1.04 | 0.89 | -1.22 | 6.25E-06 | 0.235 | 0.186 | 0.74 | 0.65 | -0.86 | 0.84 | 3.01E-03 | PRICKLE2-AS1                                        | ncRNA_intronic |
| 7  | 65256634  | C | T | rs1967493   | 2.83E-05 | 0.235 | 0.285 | 1.30 | 1.13 | -1.5  | 9.26E-01 | 0.277 | 0.275 | 0.99 | 0.87 | -1.13 | 1.22 | 3.01E-03 | LOC441242(dist=20837), VKORC1L1(dist=81623)         | intergenic     |
| 4  | 122565372 | C | A | rs13131447  | 9.38E-01 | 0.254 | 0.250 | 1.02 | 0.88 | -1.17 | 2.53E-05 | 0.219 | 0.275 | 0.74 | 0.64 | -0.85 | 0.85 | 3.01E-03 | QRFPR(dist=263191), ANXA5(dist=23780)               | intergenic     |
| 15 | 61076219  | C | T | rs2899662   | 9.84E-01 | 0.114 | 0.102 | 1.14 | 0.94 | -1.39 | 2.42E-05 | 0.142 | 0.114 | 1.28 | 1.08 | -1.52 | 1.25 | 3.02E-03 | RORA                                                | intronic       |
| 3  | 143090944 | G | C | rs115160850 | 9.79E-01 | 0.069 | 0.072 | 0.96 | 0.75 | -1.22 | 1.02E-05 | 0.087 | 0.057 | 1.57 | 1.26 | -1.94 | 1.32 | 3.04E-03 | SLC9A9                                              | intronic       |
| 3  | 175256900 | G | A | rs56100104  | 1.43E-05 | 0.066 | 0.037 | 1.84 | 1.4  | -2.44 | 8.71E-01 | 0.050 | 0.053 | 0.93 | 0.71 | -1.22 | 1.47 | 3.04E-03 | NAALADL2                                            | intronic       |
| 3  | 64013417  | G | A | rs35839     | 5.99E-01 | 0.244 | 0.257 | 0.93 | 0.81 | -1.08 | 3.96E-06 | 0.287 | 0.228 | 1.36 | 1.19 | -1.55 | 1.17 | 3.04E-03 | PSMD6(dist=3731), PRICKLE2-AS1(dist=40223)          | intergenic     |
| 8  | 127604304 | G | C | rs11776332  | 8.89E-01 | 0.101 | 0.086 | 1.19 | 0.97 | -1.47 | 4.24E-06 | 0.169 | 0.148 | 1.17 | 1    | -1.37 | 1.30 | 3.05E-03 | FAM84B(dist=33593), PCAT1(dist=421095)              | intergenic     |
| 2  | 103304862 | C | T | rs77919130  | 9.48E-01 | 0.053 | 0.054 | 0.97 | 0.73 | -1.27 | 1.40E-05 | 0.067 | 0.044 | 1.57 | 1.23 | -2    | 1.50 | 3.06E-03 | SLC9A2                                              | intronic       |
| 16 | 51125028  | A | T | rs139541105 | 8.41E-01 | 0.034 | 0.031 | 1.12 | 0.79 | -1.58 | 2.79E-05 | 0.042 | 0.026 | 1.61 | 1.18 | -2.18 | 1.60 | 3.06E-03 | LOC101927334(dist=55340), SALL1(dist=44858)         | intergenic     |
| 6  | 96853967  | C | T | rs4839827   | 8.86E-01 | 0.408 | 0.406 | 1.01 | 0.89 | -1.15 | 2.66E-05 | 0.437 | 0.391 | 1.21 | 1.08 | -1.36 | 1.16 | 3.07E-03 | FUT9(dist=190479), UFL1(dist=115735)                | intergenic     |
| 1  | 18274304  | G | A | rs10127575  | 6.41E-01 | 0.171 | 0.167 | 1.03 | 0.87 | -1.21 | 3.96E-05 | 0.227 | 0.188 | 1.27 | 1.1  | -1.46 | 1.21 | 3.07E-03 | ACTL8(dist=120746), LOC101927876(dist=117847)       | intergenic     |
| 1  | 204714405 | C | A | rs112328122 | 7.58E-01 | 0.178 | 0.180 | 0.99 | 0.84 | -1.16 | 4.26E-05 | 0.217 | 0.164 | 1.41 | 1.22 | -1.63 | 1.20 | 3.11E-03 | LRRN2(dist=59808), NFASC(dist=83377)                | intergenic     |
| 14 | 90906217  | T | C | rs78480100  | 3.84E-05 | 0.077 | 0.116 | 0.64 | 0.51 | -0.79 | 7.32E-01 | 0.107 | 0.105 | 1.02 | 0.84 | -1.23 | 0.79 | 3.12E-03 | CALM1(dist=31598), LINC00642(dist=15357)            | intergenic     |
| 6  | 31893944  | G | A | rs2734335   | 9.01E-01 | 0.463 | 0.466 | 1.01 | 0.89 | -1.15 | 5.88E-05 | 0.418 | 0.481 | 1.29 | 1.15 | -1.45 | 1.14 | 3.14E-03 | C2                                                  | intronic       |
| 4  | 92508896  | G | T | rs28671494  | 9.95E-01 | 0.118 | 0.119 | 0.99 | 0.82 | -1.2  | 4.65E-05 | 0.151 | 0.106 | 1.51 | 1.27 | -1.78 | 1.22 | 3.14E-03 | CCSER1                                              | intronic       |
| 14 | 56423536  | T | C | rs1188151   | 7.16E-01 | 0.403 | 0.402 | 1.00 | 0.88 | -1.13 | 1.50E-05 | 0.454 | 0.398 | 0.80 | 0.71 | -0.89 | 0.87 | 3.15E-03 | LINC00520(dist=160144), PELI2(dist=161557)          | intergenic     |
| 14 | 30735614  | C | G | rs10145397  | 8.77E-01 | 0.022 | 0.025 | 0.91 | 0.6  | -1.37 | 3.97E-05 | 0.007 | 0.022 | 0.32 | 0.17 | -0.61 | 0.62 | 3.15E-03 | PRKD1(dist=338715), G2E3(dist=292715)               | intergenic     |
| 4  | 92506460  | A | T | rs7671479   | 9.96E-01 | 0.118 | 0.119 | 0.99 | 0.82 | -1.2  | 4.70E-05 | 0.151 | 0.106 | 1.51 | 1.27 | -1.78 | 1.22 | 3.16E-03 | CCSER1                                              | intronic       |
| 10 | 15447606  | C | T | rs7908259   | 9.90E-01 | 0.070 | 0.066 | 1.06 | 0.83 | -1.36 | 6.02E-05 | 0.090 | 0.063 | 1.46 | 1.18 | -1.8  | 1.31 | 3.16E-03 | FAM171A1(dist=34548), ITGA8(dist=108342)            | intergenic     |
| 7  | 113541607 | T | C | rs12673425  | 8.64E-01 | 0.361 | 0.367 | 0.97 | 0.86 | -1.11 | 1.29E-05 | 0.309 | 0.357 | 0.80 | 0.71 | -0.91 | 0.87 | 3.17E-03 | PPP1R3A                                             | intronic       |
| 1  | 221215212 | C | T | rs12072517  | 7.19E-01 | 0.187 | 0.189 | 0.99 | 0.84 | -1.16 | 6.22E-05 | 0.219 | 0.168 | 1.39 | 1.2  | -1.6  | 1.20 | 3.17E-03 | HLX(dist=156812), C1orf140(dist=288058)             | intergenic     |
| 4  | 3276491   | C | T | rs10937921  | 9.93E-01 | 0.471 | 0.470 | 1.00 | 0.88 | -1.13 | 5.57E-05 | 0.517 | 0.453 | 1.30 | 1.15 | -1.46 | 1.15 | 3.18E-03 | MSANTD1(dist=18149), RGS12(dist=39383)              | intergenic     |
| 6  | 114356044 | A | C | rs4438988   | 9.88E-01 | 0.263 | 0.252 | 1.06 | 0.92 | -1.22 | 2.94E-05 | 0.210 | 0.276 | 0.70 | 0.61 | -0.81 | 0.85 | 3.21E-03 | LOC101927768                                        | ncRNA_intronic |
| 1  | 177606246 | G | A | rs143748467 | 3.46E-01 | 0.043 | 0.039 | 1.11 | 0.81 | -1.51 | 6.29E-05 | 0.038 | 0.022 | 1.71 | 1.24 | -2.37 | 1.57 | 3.22E-03 | LOC102724661(dist=270652), LOC101928778(dist=63413) | intergenic     |
| 12 | 43024542  | C | T | rs146105541 | 9.05E-01 | 0.033 | 0.034 | 0.96 | 0.68 | -1.35 | 5.94E-05 | 0.050 | 0.029 | 1.80 | 1.36 | -2.4  | 1.49 | 3.23E-03 | LOC101927058                                        | ncRNA_intronic |
| 11 | 10859258  | C | G | rs2687486   | 8.45E-01 | 0.395 | 0.390 | 0.98 | 0.86 | -1.11 | 1.59E-05 | 0.455 | 0.407 | 0.82 | 0.73 | -0.92 | 0.87 | 3.27E-03 | LOC101928053(dist=14780), ZBED5(dist=14993)         | intergenic     |
| 2  | 47051551  | G | A | rs1374273   | 8.44E-01 | 0.163 | 0.149 | 0.90 | 0.76 | -1.07 | 5.44E-05 | 0.224 | 0.195 | 0.84 | 0.73 | -0.97 | 0.82 | 3.29E-03 | LINC01118(dist=1752), LINC01119(dist=3452)          | intergenic     |
| 8  | 33901522  | C | T | rs150724154 | 9.37E-01 | 0.046 | 0.049 | 0.95 | 0.71 | -1.27 | 5.60E-05 | 0.069 | 0.045 | 1.59 | 1.25 | -2.03 | 1.41 | 3.33E-03 | DUSP26(dist=443898), LINC01288(dist=739917)         | intergenic     |
| 18 | 72905053  | T | C | rs115979417 | 3.45E-05 | 0.063 | 0.039 | 1.66 | 1.26 | -2.19 | 7.97E-01 | 0.033 | 0.033 | 1.00 | 0.72 | -1.38 | 1.42 | 3.34E-03 | ZNF407(dist=127425), ZADH2(dist=4225)               |                |

|    |           |   |   |             |          |       |       |      |             |          |       |       |      |             |      |          |                                             |                |
|----|-----------|---|---|-------------|----------|-------|-------|------|-------------|----------|-------|-------|------|-------------|------|----------|---------------------------------------------|----------------|
| 12 | 12256375  | G | A | rs2416991   | 5.59E-01 | 0.296 | 0.284 | 0.94 | 0.82 - 1.08 | 1.58E-05 | 0.251 | 0.317 | 1.38 | 1.21 - 1.58 | 1.17 | 3.46E-03 | BCL2L14(dist=3748), MIR1244-4(dist=8511)    | intergenic     |
| 11 | 18549962  | A | C | rs113933142 | 8.17E-01 | 0.069 | 0.069 | 0.99 | 0.77 - 1.26 | 6.56E-06 | 0.091 | 0.067 | 1.40 | 1.13 - 1.72 | 1.37 | 3.47E-03 | TSG101(dist=1459), UEVLD(dist=2988)         | intergenic     |
| 11 | 39330215  | C | T | rs114385105 | 8.90E-06 | 0.120 | 0.087 | 1.43 | 1.17 - 1.74 | 7.83E-01 | 0.088 | 0.086 | 1.04 | 0.84 - 1.27 | 1.28 | 3.48E-03 | LINC01493(dist=653416), LRRC4C(dist=805536) | intergenic     |
| 3  | 30122636  | A | C | rs114186356 | 6.73E-01 | 0.022 | 0.026 | 0.84 | 0.56 - 1.28 | 1.08E-05 | 0.043 | 0.022 | 1.96 | 1.43 - 2.68 | 1.56 | 3.48E-03 | RBMS3(dist=70750), TGFBR2(dist=525358)      | intergenic     |
| 6  | 141670954 | A | G | rs139242702 | 9.64E-01 | 0.021 | 0.022 | 0.94 | 0.61 - 1.44 | 2.03E-05 | 0.036 | 0.020 | 1.82 | 1.3 - 2.55  | 1.69 | 3.48E-03 | MIR4465(dist=665934), NMBR(dist=725791)     | intergenic     |
| 18 | 72912486  | A | G | rs74389878  | 3.45E-05 | 0.062 | 0.039 | 1.64 | 1.24 - 2.17 | 8.06E-01 | 0.033 | 0.033 | 1.00 | 0.72 - 1.39 | 1.43 | 3.48E-03 | ZADH2(NM_175907:c.*885T>C)                  | UTR3           |
| 9  | 117101725 | G | C | rs16928312  | 7.32E-01 | 0.120 | 0.129 | 0.92 | 0.76 - 1.11 | 1.20E-05 | 0.153 | 0.107 | 1.51 | 1.28 - 1.79 | 1.22 | 3.49E-03 | AKNA                                        | intronic       |
| 2  | 32842310  | T | A | rs150508699 | 7.83E-06 | 0.043 | 0.024 | 1.83 | 1.3 - 2.57  | 5.68E-01 | 0.023 | 0.025 | 0.95 | 0.65 - 1.4  | 1.61 | 3.49E-03 | BIRC6                                       | intronic       |
| 3  | 30119674  | G | A | rs9828977   | 6.88E-01 | 0.023 | 0.027 | 0.84 | 0.57 - 1.26 | 1.30E-05 | 0.042 | 0.022 | 1.94 | 1.42 - 2.66 | 1.57 | 3.49E-03 | RBMS3(dist=67788), TGFBR2(dist=528320)      | intergenic     |
| 5  | 115108975 | G | A | rs76620366  | 7.51E-01 | 0.025 | 0.024 | 1.04 | 0.7 - 1.56  | 3.81E-05 | 0.039 | 0.023 | 1.74 | 1.27 - 2.4  | 1.69 | 3.49E-03 | LOC102467217(dist=100626), CDO1(dist=31455) | intergenic     |
| 3  | 59866834  | A | G | rs17061321  | 6.30E-05 | 0.249 | 0.212 | 1.23 | 1.07 - 1.43 | 8.44E-01 | 0.221 | 0.210 | 1.06 | 0.92 - 1.23 | 1.17 | 3.50E-03 | FHIT                                        | intronic       |
| 8  | 124968132 | G | A | rs59703590  | 9.94E-01 | 0.182 | 0.191 | 0.94 | 0.8 - 1.1   | 3.57E-05 | 0.138 | 0.171 | 0.77 | 0.66 - 0.92 | 0.83 | 3.52E-03 | FER1L6                                      | intronic       |
| 12 | 44239566  | G | C | rs114261864 | 6.27E-01 | 0.022 | 0.026 | 0.85 | 0.57 - 1.29 | 4.71E-05 | 0.059 | 0.035 | 1.74 | 1.33 - 2.26 | 1.49 | 3.54E-03 | TMEM117                                     | intronic       |
| 15 | 75330095  | G | T | rs77456790  | 7.52E-01 | 0.058 | 0.053 | 1.10 | 0.84 - 1.43 | 5.97E-05 | 0.071 | 0.051 | 1.41 | 1.11 - 1.78 | 1.43 | 3.60E-03 | PPCDC                                       | intronic       |
| 7  | 70752158  | C | T | rs112001511 | 5.04E-05 | 0.010 | 0.030 | 0.31 | 0.18 - 0.55 | 9.33E-01 | 0.021 | 0.021 | 1.01 | 0.67 - 1.52 | 0.63 | 3.60E-03 | WBSCR17                                     | intronic       |
| 18 | 72897271  | C | T | rs146531426 | 3.99E-05 | 0.063 | 0.039 | 1.66 | 1.26 - 2.19 | 7.86E-01 | 0.033 | 0.034 | 1.00 | 0.72 - 1.38 | 1.41 | 3.62E-03 | ZNF407(dist=119643), ZADH2(dist=12007)      | intergenic     |
| 10 | 15436365  | T | C | rs11594333  | 8.42E-01 | 0.078 | 0.074 | 1.06 | 0.84 - 1.34 | 2.04E-05 | 0.103 | 0.076 | 1.39 | 1.14 - 1.69 | 1.30 | 3.63E-03 | FAM171A1(dist=23307), ITGA8(dist=119583)    | intergenic     |
| 18 | 4848173   | A | G | rs6506254   | 9.30E-01 | 0.114 | 0.118 | 1.04 | 0.85 - 1.26 | 1.32E-05 | 0.141 | 0.103 | 0.70 | 0.59 - 0.83 | 0.80 | 3.63E-03 | DLGAP1(dist=392907), C18orf42(dist=295499)  | intergenic     |
| 14 | 62724232  | T | C | rs11158379  | 9.53E-01 | 0.302 | 0.310 | 1.04 | 0.91 - 1.19 | 3.41E-05 | 0.343 | 0.285 | 0.76 | 0.67 - 0.86 | 0.86 | 3.64E-03 | LINC00644(dist=117541), KCNH5(dist=449059)  | intergenic     |
| 16 | 70689249  | C | T | rs146437870 | 6.97E-01 | 0.036 | 0.036 | 1.00 | 0.72 - 1.4  | 5.04E-05 | 0.049 | 0.031 | 1.64 | 1.23 - 2.17 | 1.53 | 3.64E-03 | IL34                                        | intronic       |
| 9  | 36095673  | C | T | rs111566538 | 1.25E-05 | 0.086 | 0.056 | 1.60 | 1.26 - 2.02 | 9.65E-01 | 0.064 | 0.060 | 1.07 | 0.84 - 1.36 | 1.31 | 3.66E-03 | RECK                                        | intronic       |
| 2  | 197222704 | G | A | rs1902268   | 7.45E-01 | 0.107 | 0.113 | 1.07 | 0.88 - 1.3  | 4.30E-05 | 0.123 | 0.085 | 0.67 | 0.55 - 0.8  | 0.79 | 3.69E-03 | HECW2                                       | intronic       |
| 2  | 204729153 | C | T | rs231770    | 5.96E-01 | 0.398 | 0.390 | 1.04 | 0.91 - 1.18 | 3.50E-06 | 0.140 | 0.406 | 0.75 | 0.67 - 0.85 | 0.87 | 3.69E-03 | CD28(dist=125517), CTLA4(dist=3358)         | intergenic     |
| 10 | 49944268  | T | G | rs41282001  | 6.55E-06 | 0.045 | 0.023 | 2.03 | 1.45 - 2.86 | 7.05E-01 | 0.036 | 0.037 | 0.98 | 0.72 - 1.34 | 1.64 | 3.69E-03 | WDFY4                                       | intronic       |
| 17 | 33124755  | G | C | rs148312904 | 2.43E-05 | 0.048 | 0.082 | 0.56 | 0.43 - 0.74 | 7.90E-01 | 0.060 | 0.057 | 1.07 | 0.83 - 1.37 | 0.76 | 3.69E-03 | TMEM132E(dist=158413), CCT6B(dist=130123)   | intergenic     |
| 13 | 26293113  | A | G | rs3117860   | 5.95E-05 | 0.460 | 0.510 | 1.22 | 1.08 - 1.38 | 7.63E-01 | 0.487 | 0.470 | 1.07 | 0.95 - 1.2  | 1.14 | 3.73E-03 | ATP8A2                                      | intronic       |
| 19 | 16079003  | A | C | rs7259327   | 4.61E-05 | 0.305 | 0.256 | 1.28 | 1.11 - 1.46 | 9.05E-01 | 0.239 | 0.230 | 1.05 | 0.92 - 1.21 | 1.18 | 3.73E-03 | OR10H4(dist=18235), LINC00661(dist=47441)   | intergenic     |
| 4  | 189435070 | G | A | rs10012220  | 2.96E-05 | 0.083 | 0.055 | 1.55 | 1.22 - 1.97 | 8.82E-01 | 0.057 | 0.053 | 1.06 | 0.83 - 1.37 | 1.34 | 3.73E-03 | LINC01060                                   | ncRNA_intronic |
| 5  | 148621845 | G | A | rs41291953  | 9.43E-01 | 0.200 | 0.207 | 0.96 | 0.82 - 1.12 | 2.77E-05 | 0.151 | 0.189 | 0.76 | 0.65 - 0.9  | 0.84 | 3.73E-03 | ABLIM3                                      | intronic       |
| 17 | 33126878  | G | A | rs115645926 | 2.44E-05 | 0.048 | 0.082 | 0.56 | 0.43 - 0.74 | 7.87E-01 | 0.060 | 0.057 | 1.07 | 0.83 - 1.37 | 0.76 | 3.74E-03 | TMEM132E(dist=160536), CCT6B(dist=128000)   | intergenic     |
| 7  | 12726163  | C | T | rs3757442   | 1.70E-05 | 0.366 | 0.409 | 1.20 | 1.06 - 1.37 | 9.15E-01 | 0.431 | 0.448 | 1.07 | 0.95 - 1.21 | 1.15 | 3.78E-03 | ARL4A                                       | upstream       |
| 16 | 89801892  | G | C | rs11649155  | 9.55E-01 | 0.188 | 0.187 | 1.01 | 0.86 - 1.18 | 4.35E-05 | 0.243 | 0.202 | 1.27 | 1.11 - 1.46 | 1.19 | 3.78E-03 | ZNF276                                      | intronic       |
| 3  | 191965028 | A | G | rs111560637 | 9.43E-01 | 0.040 | 0.043 | 0.94 | 0.69 - 1.28 | 4.49E-05 | 0.068 | 0.043 | 1.61 | 1.26 - 2.06 | 1.41 | 3.81E-03 | FGF12-AS1                                   | ncRNA_intronic |
| 12 | 12257135  | T | C | rs4763783   | 5.49E-01 | 0.294 | 0.282 | 0.94 | 0.82 - 1.08 | 1.46E-05 | 0.251 | 0.315 | 1.38 | 1.2 - 1.57  | 1.17 | 3.81E-03 | BCL2L14(dist=4508), MIR1244-4(dist=7751)    | intergenic     |
| 16 | 86568470  | C | T | rs4843388   | 8.42E-01 | 0.335 | 0.335 | 1.00 | 0.88 - 1.14 | 5.16E-05 | 0.354 | 0.298 | 1.29 | 1.14 - 1.46 | 1.16 | 3.82E-03 | MTHFSD                                      | intronic       |
| 2  | 60837085  | T | C | rs842942    | 2.40E-05 | 0.520 | 0.446 | 1.34 | 1.19 - 1.52 | 1.00E+00 | 0.468 | 0.477 | 0.96 | 0.86 - 1.08 | 1.14 | 3.82E-03 | BCL11A(dist=56452), PAPOLG(dist=146280)     | intergenic     |
| 18 | 72273161  | G | A | rs8090212   | 3.87E-05 | 0.147 | 0.199 | 1.45 | 1.22 - 1.71 | 9.67E-01 | 0.165 | 0.163 | 0.99 | 0.84 - 1.16 | 1.19 | 3.83E-03 | LINC00909(dist=8090), ZNF407(dist=69758)    | intergenic     |
| 18 | 72900325  | C | T | rs115921118 | 4.34E-05 | 0.063 | 0.039 | 1.65 | 1.25 - 2.18 | 7.83E-01 | 0.033 | 0.034 | 1.00 | 0.72 - 1.38 | 1.41 | 3.84E-03 | ZNF407(dist=122697), ZADH2(dist=8953)       | intergenic     |
| 11 | 76921090  | G | A | rs12793189  | 8.42E-01 | 0.445 | 0.445 | 1.00 | 0.88 - 1.13 | 5.79E-05 | 0.507 | 0.456 | 0.82 | 0.73 - 0.92 | 0.87 | 3.84E-03 | IMY07A                                      | intronic       |
| 4  | 92513259  | C | G | rs28421145  | 9.11E-01 | 0.118 | 0.120 | 0.98 | 0.81 - 1.19 | 4.60E-05 | 0.151 | 0.106 | 1.51 | 1.27 - 1.78 | 1.22 | 3.87E-03 | CCSER1                                      | intronic       |
| 9  | 36118219  | A | G | rs6476529   | 3.12E-05 | 0.106 | 0.074 | 1.48 | 1.2 - 1.83  | 9.03E-01 | 0.084 | 0.079 | 1.08 | 0.87 - 1.33 | 1.27 | 3.92E-03 | RECK                                        | intronic       |
| 13 | 26291420  | A | G | rs3132350   | 6.45E-05 | 0.460 | 0.509 | 1.22 | 1.08 - 1.38 | 7.66E-01 | 0.487 | 0.470 | 1.07 | 0.95 - 1.2  | 1.14 | 3.93E-03 | ATP8A2                                      | intronic       |
| 13 | 26293389  | G | A | rs3117858   | 6.01E-05 | 0.459 | 0.509 | 1.22 | 1.08 - 1.38 | 7.78E-01 | 0.487 | 0.471 | 1.07 | 0.95 - 1.2  | 1.14 | 3.93E-03 | ATP8A2                                      | intronic       |
| 9  | 36127446  | G | A | rs116349039 | 1.51E-05 | 0.109 | 0.076 | 1.49 | 1.21 - 1.84 | 9.78E-01 | 0.089 | 0.084 | 1.07 | 0.87 - 1.31 | 1.27 | 3.96E-03 | RECK(dist=2994), GLIPR2(dist=9087)          | intergenic     |
| 13 | 43098967  | A | T | rs35230292  | 3.50E-05 | 0.179 | 0.230 | 0.73 | 0.63 - 0.86 | 8.71E-01 | 0.199 | 0.201 | 0.98 | 0.85 - 1.14 | 0.84 | 3.97E-03 | AKAP11(dist=201564), TNFSF11(dist=37905)    | intergenic     |
| 4  | 14573029  | C | T | rs12504369  | 9.91E-01 | 0.446 | 0.436 | 1.04 | 0.92 - 1.18 | 5.65E-05 | 0.492 | 0.451 | 1.18 | 1.05 - 1.33 | 1.14 | 4.00E-03 | LINC00504                                   | ncRNA_intronic |
| 7  | 9501328   | A | G | rs2713313   | 8.39E-06 | 0.310 | 0.258 | 0.78 | 0.68 - 0.89 | 8.26E-01 | 0.268 | 0.269 | 1.01 | 0.88 - 1.15 | 0.84 | 4.01E-03 | NXP1(dist=708735), PER4(dist=172572)        | intergenic     |
| 10 | 124511464 | C | A | rs10902919  | 2.64E-05 | 0.410 | 0.456 | 0.83 | 0.73 - 0.94 | 7.07E-01 | 0.477 | 0.496 | 0.93 | 0.82 - 1.04 | 0.87 | 4.03E-03 | C10orf120(dist=52126), DMBT1P1(dist=4746)   | intergenic     |
| 13 | 26292305  | G | A | rs3132353   | 6.42E-05 | 0.460 | 0.509 | 1.22 | 1.08 - 1.38 | 7.77E-01 | 0.487 | 0.471 | 1.07 | 0.95 - 1.2  | 1.14 | 4.04E-03 | ATP8A2                                      | intronic       |
| 7  | 70757979  | C | T | rs78779164  | 6.47E-05 | 0.010 | 0.031 | 0.32 | 0.19 - 0.56 | 9.26E-01 | 0.021 | 0.021 | 1.01 | 0.67 - 1.52 | 0.64 | 4.05E-03 | WBSCR17                                     | intronic       |
| 9  | 36096970  | C | A | rs57437540  | 6.11E-05 | 0.104 | 0.073 | 1.46 | 1.18 - 1.82 | 7.83E-01 | 0.085 | 0.078 | 1.09 | 0.89 - 1.35 | 1.27 | 4.08E-03 | RECK                                        | intronic       |
| 9  | 36096955  | G | A | rs57945034  | 6.12E-05 | 0.104 | 0.073 | 1.46 | 1.18 - 1.82 | 7.83E-01 | 0.085 | 0.078 | 1.09 | 0.89 - 1.35 | 1.27 | 4.08E-03 | RECK                                        | intronic       |
| 9  | 36089032  | T | A | rs78588890  | 1.62E-05 | 0.087 | 0.056 | 1.59 | 1.25 - 2.01 | 9.64E-01 | 0.064 | 0.060 | 1.07 | 0.84 - 1.36 | 1.31 | 4.09E-03 | RECK                                        | intronic       |
| 3  | 168369375 | T | C | rs10804826  | 9.33E-01 | 0.154 | 0.146 | 0.94 | 0.79 - 1.12 | 3.63E-05 | 0.197 | 0.161 | 0.78 | 0.68 - 0.91 | 0.83 | 4.11E-03 | EGFEM1P                                     | ncRNA_intronic |
| 10 | 15455419  | A | C | rs61842742  | 8.37E-01 | 0.074 | 0.072 | 1.03 | 0.81 - 1.3  | 3.85E-05 | 0.094 | 0.067 | 1.44 | 1.17 - 1.78 | 1.30 | 4.15E-03 | FAM171A1(dist=42361), ITGA8(dist=100529)    | intergenic     |
| 1  | 204712257 | G | A | rs73076076  | 8.56E-01 | 0.176 | 0.179 | 0.98 | 0.83 - 1.15 | 4.38E-05 | 0.215 | 0.162 | 1.41 | 1.22 - 1.63 | 1.19 | 4.17E-03 | LRRN2(dist=57660), NFASC(dist=85525)        | intergenic     |
| 13 | 26293733  | G | T | rs3132355   | 5.80E-05 | 0.459 | 0.509 | 1.22 | 1.08 - 1.38 | 8.04E-01 | 0.488 | 0.472 | 1.07 | 0.95 - 1.2  | 1.14 | 4.18E-03 | ATP8A2                                      | intronic       |
| 13 | 43099692  | A | G | rs35355882  | 4.02E-05 | 0.181 | 0.229 | 0.74 | 0.63 - 0.87 | 8.60E-01 | 0.197 | 0.199 | 0.98 | 0.85 - 1.14 | 0.83 | 4.20E-03 | AKAP11(dist=202289), TNFSF11(dist=37180)    | intergenic     |
| 9  | 36101195  | G | T | rs7856652   | 2.20E-05 | 0.104 | 0.071 | 1.50 | 1.21 - 1.86 | 9.48E-01 | 0.083 | 0.078 | 1.07 | 0.86 - 1.32 | 1.27 | 4.22E-03 | RECK</                                      |                |

|    |           |   |   |             |          |       |       |      |      |       |          |       |       |      |      |       |      |          |                                                  |                |
|----|-----------|---|---|-------------|----------|-------|-------|------|------|-------|----------|-------|-------|------|------|-------|------|----------|--------------------------------------------------|----------------|
| 9  | 36125343  | T | A | rs78177840  | 1.89E-05 | 0.106 | 0.073 | 1.50 | 1.21 | -1.86 | 9.68E-01 | 0.086 | 0.081 | 1.07 | 0.87 | -1.32 | 1.26 | 4.32E-03 | RECK                                             | downstream     |
| 8  | 127605138 | A | G | rs17815284  | 8.39E-01 | 0.102 | 0.087 | 1.19 | 0.96 | -1.47 | 6.29E-06 | 0.169 | 0.148 | 1.17 | 1    | -1.36 | 1.28 | 4.33E-03 | FAM84B(dist=34427), PCAT1(dist=420261)           | intergenic     |
| 11 | 121104333 | T | C | rs55646951  | 9.47E-01 | 0.296 | 0.281 | 1.08 | 0.94 | -1.23 | 4.25E-05 | 0.330 | 0.290 | 1.20 | 1.06 | -1.36 | 1.17 | 4.34E-03 | TECTA(dist=42818), SC5D(dist=59055)              | intergenic     |
| 7  | 158020293 | T | C | rs6974924   | 9.18E-01 | 0.335 | 0.320 | 0.93 | 0.82 | -1.07 | 3.34E-05 | 0.296 | 0.359 | 1.33 | 1.17 | -1.51 | 1.15 | 4.36E-03 | PTPRN2                                           | intronic       |
| 7  | 158020287 | C | A | rs6951312   | 9.18E-01 | 0.335 | 0.320 | 0.93 | 0.82 | -1.07 | 3.34E-05 | 0.296 | 0.359 | 1.33 | 1.17 | -1.51 | 1.15 | 4.37E-03 | PTPRN2                                           | intronic       |
| 7  | 158020284 | T | G | rs6974918   | 9.17E-01 | 0.335 | 0.320 | 0.93 | 0.82 | -1.07 | 3.34E-05 | 0.296 | 0.359 | 1.33 | 1.17 | -1.51 | 1.15 | 4.37E-03 | PTPRN2                                           | intronic       |
| 13 | 27715813  | A | C | rs7326966   | 1.65E-05 | 0.377 | 0.451 | 1.36 | 1.2  | -1.54 | 9.46E-01 | 0.430 | 0.428 | 0.99 | 0.88 | -1.12 | 1.14 | 4.42E-03 | USP12-AS1                                        | ncRNA_intronic |
| 2  | 224757456 | T | C | rs73994413  | 3.73E-05 | 0.051 | 0.028 | 1.89 | 1.38 | -2.6  | 7.35E-01 | 0.032 | 0.032 | 1.01 | 0.72 | -1.4  | 1.47 | 4.43E-03 | WDFY1                                            | intronic       |
| 9  | 36124882  | G | A | rs76297474  | 1.94E-05 | 0.106 | 0.073 | 1.50 | 1.21 | -1.86 | 9.72E-01 | 0.086 | 0.081 | 1.07 | 0.87 | -1.32 | 1.26 | 4.43E-03 | RECK                                             | downstream     |
| 16 | 85084266  | A | G | rs8047023   | 8.82E-01 | 0.387 | 0.372 | 0.94 | 0.83 | -1.07 | 3.87E-05 | 0.343 | 0.412 | 1.34 | 1.19 | -1.52 | 1.15 | 4.45E-03 | KIAA0513                                         | intronic       |
| 8  | 117959731 | A | G | rs77436457  | 7.91E-06 | 0.049 | 0.027 | 1.82 | 1.32 | -2.51 | 8.42E-01 | 0.034 | 0.033 | 1.01 | 0.73 | -1.4  | 1.50 | 4.46E-03 | AARD(dist=3492), SLC30A8(dist=2781)              | intergenic     |
| 6  | 14764877  | C | G | rs742038    | 2.20E-05 | 0.364 | 0.405 | 0.84 | 0.74 | -0.96 | 9.56E-01 | 0.397 | 0.422 | 0.90 | 0.8  | -1.02 | 0.87 | 4.46E-03 | LINC01108(dist=479192), JARID2(dist=481329)      | intergenic     |
| 4  | 88307042  | G | A | rs115037129 | 7.50E-01 | 0.021 | 0.024 | 0.86 | 0.56 | -1.32 | 4.54E-05 | 0.041 | 0.021 | 1.97 | 1.43 | -2.72 | 1.56 | 4.47E-03 | HSD17B11                                         | intronic       |
| 14 | 26756524  | G | A | rs114818847 | 9.74E-01 | 0.038 | 0.042 | 0.91 | 0.66 | -1.25 | 1.16E-05 | 0.046 | 0.024 | 1.94 | 1.43 | -2.61 | 1.46 | 4.48E-03 | STXBP6(dist=1237021), NOVA1(dist=158565)         | intergenic     |
| 12 | 940205    | C | T | rs77848352  | 6.21E-05 | 0.062 | 0.040 | 1.59 | 1.2  | -2.1  | 7.70E-01 | 0.051 | 0.047 | 1.10 | 0.84 | -1.44 | 1.37 | 4.49E-03 | WNK1                                             | intronic       |
| 13 | 109670246 | A | G | rs111472743 | 1.80E-05 | 0.052 | 0.032 | 1.67 | 1.23 | -2.26 | 6.98E-01 | 0.031 | 0.032 | 0.99 | 0.71 | -1.38 | 1.48 | 4.52E-03 | MYO16                                            | intronic       |
| 2  | 129144398 | G | A | rs56228223  | 8.90E-01 | 0.079 | 0.066 | 1.21 | 0.96 | -1.54 | 3.87E-05 | 0.110 | 0.095 | 1.18 | 0.98 | -1.43 | 1.33 | 4.53E-03 | HS6ST1(dist=68227), LOC101927881(dist=477776)    | intergenic     |
| 1  | 198647278 | T | C | rs78075349  | 2.41E-05 | 0.044 | 0.024 | 1.86 | 1.33 | -2.61 | 9.39E-01 | 0.032 | 0.030 | 1.06 | 0.75 | -1.48 | 1.45 | 4.54E-03 | PTPRC                                            | intronic       |
| 9  | 36117779  | T | C | rs111952135 | 2.94E-05 | 0.106 | 0.074 | 1.48 | 1.2  | -1.83 | 9.16E-01 | 0.087 | 0.082 | 1.07 | 0.87 | -1.32 | 1.26 | 4.55E-03 | RECK                                             | intronic       |
| 1  | 72803096  | C | A | rs11209946  | 8.67E-01 | 0.082 | 0.075 | 1.11 | 0.89 | -1.4  | 3.78E-05 | 0.119 | 0.103 | 1.17 | 0.98 | -1.41 | 1.34 | 4.55E-03 | NEGR1(dist=54819), LINC01360(dist=968757)        | intergenic     |
| 10 | 15437159  | G | A | rs10508485  | 8.01E-01 | 0.077 | 0.074 | 1.05 | 0.83 | -1.33 | 6.38E-05 | 0.103 | 0.075 | 1.41 | 1.16 | -1.72 | 1.28 | 4.57E-03 | FAM171A1(dist=24101), ITGA8(dist=118789)         | intergenic     |
| 9  | 36102275  | C | G | rs75300380  | 4.88E-05 | 0.105 | 0.074 | 1.47 | 1.19 | -1.82 | 8.50E-01 | 0.086 | 0.080 | 1.08 | 0.88 | -1.34 | 1.26 | 4.58E-03 | RECK                                             | intronic       |
| 9  | 36102414  | T | C | rs79490359  | 4.88E-05 | 0.105 | 0.074 | 1.47 | 1.19 | -1.82 | 8.50E-01 | 0.086 | 0.080 | 1.08 | 0.88 | -1.34 | 1.26 | 4.58E-03 | RECK                                             | intronic       |
| 9  | 36102072  | C | T | rs74372001  | 4.89E-05 | 0.105 | 0.074 | 1.47 | 1.19 | -1.82 | 8.50E-01 | 0.086 | 0.080 | 1.08 | 0.88 | -1.34 | 1.26 | 4.58E-03 | RECK                                             | intronic       |
| 6  | 114376730 | C | G | rs7748963   | 9.72E-01 | 0.257 | 0.251 | 0.97 | 0.84 | -1.12 | 6.09E-05 | 0.210 | 0.264 | 1.35 | 1.17 | -1.55 | 1.16 | 4.58E-03 | LOC101927768                                     | ncRNA_intronic |
| 13 | 30591948  | C | T | rs75437839  | 9.96E-01 | 0.044 | 0.046 | 0.95 | 0.71 | -1.29 | 9.93E-06 | 0.058 | 0.036 | 1.66 | 1.28 | -2.17 | 1.47 | 4.59E-03 | LINC00544(dist=67323), KATNAL1(dist=184819)      | intergenic     |
| 2  | 195987747 | T | C | rs777726    | 4.19E-05 | 0.239 | 0.197 | 1.28 | 1.1  | -1.49 | 9.19E-01 | 0.188 | 0.180 | 1.06 | 0.91 | -1.23 | 1.18 | 4.60E-03 | LOC101927431(dist=361588), SLC39A10(dist=533785) | intergenic     |
| 12 | 114982445 | A | G | rs10774757  | 7.44E-01 | 0.348 | 0.353 | 0.98 | 0.86 | -1.11 | 1.75E-05 | 0.381 | 0.328 | 1.26 | 1.12 | -1.43 | 1.17 | 4.61E-03 | TBX5-AS1(dist=131808), TBX3(dist=125614)         | intergenic     |
| 18 | 72267170  | G | A | rs7230919   | 2.73E-05 | 0.141 | 0.193 | 1.45 | 1.22 | -1.72 | 8.11E-01 | 0.168 | 0.165 | 0.98 | 0.84 | -1.15 | 1.19 | 4.63E-03 | LINC00909(dist=2099), ZNF407(dist=75749)         | intergenic     |
| 2  | 224791189 | A | T | rs77841681  | 3.00E-05 | 0.096 | 0.065 | 1.52 | 1.22 | -1.9  | 6.68E-01 | 0.059 | 0.059 | 1.01 | 0.78 | -1.29 | 1.33 | 4.65E-03 | WDFY1                                            | intronic       |
| 2  | 223428269 | G | C | rs139744212 | 9.86E-01 | 0.030 | 0.032 | 0.92 | 0.64 | -1.32 | 4.53E-05 | 0.051 | 0.032 | 1.60 | 1.21 | -2.12 | 1.56 | 4.68E-03 | SGPP2(dist=4652), FARSB(dist=7893)               | intergenic     |
| 9  | 36100137  | G | A | rs74837051  | 5.19E-05 | 0.105 | 0.074 | 1.47 | 1.18 | -1.82 | 8.51E-01 | 0.085 | 0.079 | 1.08 | 0.88 | -1.34 | 1.26 | 4.69E-03 | RECK                                             | intronic       |
| 12 | 12260223  | A | G | rs61344881  | 7.39E-01 | 0.325 | 0.316 | 0.96 | 0.84 | -1.1  | 2.86E-05 | 0.294 | 0.353 | 1.31 | 1.15 | -1.49 | 1.17 | 4.70E-03 | BCL2L14(dist=7596), MIR1244-4(dist=4663)         | intergenic     |
| 8  | 18413338  | T | C | rs10106621  | 8.85E-01 | 0.053 | 0.056 | 0.94 | 0.71 | -1.23 | 3.60E-05 | 0.077 | 0.048 | 1.66 | 1.32 | -2.09 | 1.34 | 4.71E-03 | PSD3                                             | intronic       |
| 10 | 51465650  | C | T | rs199898426 | 1.90E-06 | 0.245 | 0.182 | 1.46 | 1.26 | -1.69 | 8.65E-01 | 0.231 | 0.242 | 0.94 | 0.82 | -1.08 | 1.25 | 4.73E-03 | AGAP7P                                           | ncRNA_exonic   |
| 19 | 51373279  | T | C | rs2739472   | 6.76E-01 | 0.330 | 0.332 | 1.01 | 0.89 | -1.15 | 2.59E-05 | 0.393 | 0.339 | 0.79 | 0.7  | -0.89 | 0.87 | 4.76E-03 | KLK3(dist=9259), KLK2(dist=3410)                 | intergenic     |
| 8  | 127601719 | T | C | rs10956312  | 8.31E-01 | 0.099 | 0.085 | 1.18 | 0.96 | -1.46 | 7.71E-06 | 0.168 | 0.148 | 1.16 | 0.99 | -1.36 | 1.28 | 4.78E-03 | FAM84B(dist=31008), PCAT1(dist=423680)           | intergenic     |
| 14 | 104963740 | G | A | rs115091998 | 9.67E-01 | 0.070 | 0.072 | 0.97 | 0.76 | -1.23 | 2.55E-05 | 0.082 | 0.054 | 1.59 | 1.27 | -1.98 | 1.33 | 4.79E-03 | KIF26A(dist=316505), C14orf180(dist=82281)       | intergenic     |
| 1  | 198125585 | T | C | rs80323693  | 5.84E-06 | 0.043 | 0.023 | 1.95 | 1.38 | -2.75 | 6.92E-01 | 0.028 | 0.028 | 1.00 | 0.7  | -1.43 | 1.48 | 4.79E-03 | NEK7                                             | upstream       |
| 15 | 24602535  | C | T | rs151328796 | 7.22E-01 | 0.038 | 0.043 | 0.89 | 0.65 | -1.22 | 1.41E-05 | 0.054 | 0.031 | 1.78 | 1.35 | -2.34 | 1.45 | 4.81E-03 | PWRN2(dist=187482), PWRN3(dist=83739)            | intergenic     |
| 9  | 36099468  | G | T | rs74570380  | 5.63E-05 | 0.105 | 0.074 | 1.46 | 1.18 | -1.81 | 8.50E-01 | 0.085 | 0.079 | 1.08 | 0.88 | -1.34 | 1.26 | 4.85E-03 | RECK                                             | intronic       |
| 1  | 198128817 | T | C | rs115669600 | 6.03E-06 | 0.044 | 0.023 | 1.95 | 1.38 | -2.75 | 6.91E-01 | 0.028 | 0.028 | 1.00 | 0.7  | -1.43 | 1.48 | 4.86E-03 | NEK7                                             | intronic       |
| 1  | 198128839 | G | T | rs116180579 | 6.04E-06 | 0.044 | 0.023 | 1.95 | 1.38 | -2.75 | 6.91E-01 | 0.028 | 0.028 | 1.00 | 0.7  | -1.43 | 1.48 | 4.86E-03 | NEK7                                             | intronic       |
| 1  | 210443520 | C | T | rs56295590  | 8.70E-01 | 0.030 | 0.030 | 0.98 | 0.68 | -1.42 | 4.77E-05 | 0.040 | 0.022 | 1.86 | 1.35 | -2.56 | 1.51 | 4.86E-03 | SERTAD4(dist=27080), HHAT(dist=58076)            | intergenic     |
| 10 | 15439222  | C | T | rs61842720  | 7.78E-01 | 0.077 | 0.074 | 1.05 | 0.83 | -1.32 | 6.30E-05 | 0.103 | 0.075 | 1.42 | 1.16 | -1.73 | 1.27 | 4.87E-03 | FAM171A1(dist=26164), ITGA8(dist=116726)         | intergenic     |
| 10 | 53118079  | C | G | rs1189304   | 5.81E-05 | 0.273 | 0.218 | 0.75 | 0.65 | -0.86 | 7.19E-01 | 0.249 | 0.248 | 0.99 | 0.87 | -1.14 | 0.84 | 4.87E-03 | PRKG1                                            | intronic       |
| 2  | 1768221   | G | A | rs7422692   | 8.50E-01 | 0.253 | 0.255 | 0.99 | 0.86 | -1.14 | 2.15E-05 | 0.225 | 0.270 | 0.78 | 0.68 | -0.9  | 0.86 | 4.88E-03 | PXDN(dist=19902), MYT1L(dist=24664)              | intergenic     |
| 10 | 15439732  | G | A | rs61842722  | 7.78E-01 | 0.077 | 0.074 | 1.05 | 0.83 | -1.32 | 6.30E-05 | 0.103 | 0.075 | 1.42 | 1.16 | -1.73 | 1.27 | 4.88E-03 | FAM171A1(dist=26674), ITGA8(dist=116216)         | intergenic     |
| 10 | 15439694  | T | C | rs61842721  | 7.78E-01 | 0.077 | 0.074 | 1.05 | 0.83 | -1.32 | 6.31E-05 | 0.103 | 0.075 | 1.42 | 1.16 | -1.73 | 1.27 | 4.88E-03 | FAM171A1(dist=26636), ITGA8(dist=116254)         | intergenic     |
| 12 | 84912348  | A | G | rs12370680  | 2.90E-05 | 0.149 | 0.198 | 0.71 | 0.6  | -0.84 | 9.85E-01 | 0.183 | 0.187 | 0.97 | 0.84 | -1.13 | 0.85 | 4.88E-03 | TMTC2(dist=1384281), SLC6A15(dist=340919)        | intergenic     |
| 10 | 15443313  | T | C | rs56409016  | 7.82E-01 | 0.077 | 0.074 | 1.05 | 0.83 | -1.32 | 6.37E-05 | 0.103 | 0.075 | 1.42 | 1.16 | -1.73 | 1.27 | 4.89E-03 | FAM171A1(dist=30255), ITGA8(dist=112635)         | intergenic     |
| 6  | 80619703  | A | G | rs1999021   | 6.87E-01 | 0.046 | 0.044 | 1.06 | 0.79 | -1.43 | 2.89E-05 | 0.074 | 0.059 | 1.28 | 1.02 | -1.61 | 1.38 | 4.93E-03 | C6orf7(dist=39566), ELOVL4(dist=4826)            | intergenic     |
| 8  | 124177924 | A | G | rs3107193   | 7.96E-01 | 0.083 | 0.076 | 0.91 | 0.73 | -1.15 | 4.58E-05 | 0.119 | 0.091 | 0.74 | 0.62 | -0.89 | 0.79 | 4.95E-03 | TBC1D31(dist=13534), FAM83A(dist=13361)          | intergenic     |
| 2  | 224773599 | C | T | rs73994420  | 6.03E-05 | 0.166 | 0.129 | 1.34 | 1.13 | -1.6  | 8.47E-01 | 0.119 | 0.116 | 1.03 | 0.86 | -1.23 | 1.23 | 5.00E-03 | WDFY1                                            | intronic       |
| 5  | 148626718 | A | C | rs73275734  | 9.13E-01 | 0.206 | 0.210 | 0.97 | 0.83 | -1.13 | 1.93E-05 | 0.154 | 0.193 | 0.76 | 0.65 | -0.89 | 0.85 | 5.06E-03 | ABLIM3                                           | intronic       |
| 6  | 95869123  | G | A | rs75487686  | 5.27E-05 | 0.073 | 0.046 | 1.62 | 1.25 | -2.09 | 9.23E-01 | 0.050 | 0.049 | 1.02 | 0.78 | -1.33 | 1.34 | 5.09E-03 | TSG1(dist=1382924), MANEA-AS1(dist=138849)       | intergenic     |
| 2  | 195989368 | C | A | rs777722    | 4.48E-05 | 0.239 | 0.197 | 1.28 | 1.1  | -1.48 | 8.95E-01 | 0.189 | 0.181 | 1.06 | 0.91 | -1.23 | 1.18 | 5.11E-03 | LOC101927431(dist=363209), SLC39A10(dist=532164) | intergenic     |

|    |           |   |   |                      |          |       |       |      |             |          |       |       |      |             |      |          |                                                      |                |
|----|-----------|---|---|----------------------|----------|-------|-------|------|-------------|----------|-------|-------|------|-------------|------|----------|------------------------------------------------------|----------------|
| 8  | 124194968 | C | T | rs3739291            | 7.71E-01 | 0.057 | 0.052 | 1.09 | 0.83 - 1.43 | 4.76E-05 | 0.086 | 0.063 | 1.38 | 1.12 - 1.72 | 1.33 | 5.22E-03 | FAM83A                                               | UTR5           |
| 20 | 13340470  | A | G | rs4350822            | 8.34E-01 | 0.358 | 0.371 | 0.94 | 0.83 - 1.07 | 2.64E-05 | 0.398 | 0.333 | 1.32 | 1.17 - 1.49 | 1.15 | 5.25E-03 | ISM1(dist=59173), TASP1(dist=29566)                  | intergenic     |
| 16 | 11424058  | A | G | rs112743879          | 1.18E-05 | 0.299 | 0.231 | 1.42 | 1.24 - 1.63 | 9.02E-01 | 0.270 | 0.284 | 0.93 | 0.82 - 1.06 | 1.17 | 5.25E-03 | PRM1(dist=48866), RMI2(dist=15237)                   | intergenic     |
| 18 | 27872062  | A | G | rs4799877;rs34586950 | 8.35E-01 | 0.398 | 0.393 | 1.02 | 0.9 - 1.16  | 3.00E-05 | 0.329 | 0.385 | 0.78 | 0.69 - 0.88 | 0.88 | 5.27E-03 | NONE(dist=NONE), MIR302F(dist=6814)                  | intergenic     |
| 5  | 40977869  | G | A | rs1078376            | 3.47E-05 | 0.061 | 0.032 | 1.98 | 1.48 - 2.65 | 9.71E-01 | 0.048 | 0.053 | 0.90 | 0.69 - 1.18 | 1.37 | 5.28E-03 | C7                                                   | intronic       |
| 9  | 36115417  | A | G | rs7045247;rs71336428 | 3.20E-05 | 0.106 | 0.074 | 1.48 | 1.2 - 1.83  | 9.53E-01 | 0.086 | 0.081 | 1.07 | 0.87 - 1.32 | 1.26 | 5.30E-03 | RECK                                                 | intronic       |
| 6  | 131671255 | G | T | rs17575445           | 8.93E-01 | 0.034 | 0.030 | 1.12 | 0.79 - 1.59 | 5.54E-05 | 0.042 | 0.028 | 1.52 | 1.12 - 2.06 | 1.59 | 5.31E-03 | AKAP7(dist=66580), ARG1(dist=223089)                 | intergenic     |
| 9  | 36115220  | C | G | rs7045110            | 3.21E-05 | 0.106 | 0.074 | 1.48 | 1.2 - 1.83  | 9.53E-01 | 0.086 | 0.081 | 1.07 | 0.87 - 1.32 | 1.26 | 5.31E-03 | RECK                                                 | intronic       |
| 9  | 36113026  | A | G | rs16932943           | 3.24E-05 | 0.106 | 0.074 | 1.48 | 1.2 - 1.83  | 9.53E-01 | 0.086 | 0.081 | 1.07 | 0.87 - 1.32 | 1.26 | 5.32E-03 | RECK                                                 | intronic       |
| 9  | 36112910  | A | T | rs10491850           | 3.24E-05 | 0.106 | 0.074 | 1.48 | 1.2 - 1.83  | 9.53E-01 | 0.086 | 0.081 | 1.07 | 0.87 - 1.32 | 1.26 | 5.32E-03 | RECK                                                 | intronic       |
| 4  | 32195626  | A | G | rs17080899           | 8.36E-01 | 0.080 | 0.084 | 0.95 | 0.76 - 1.19 | 3.60E-05 | 0.099 | 0.069 | 1.47 | 1.2 - 1.8   | 1.30 | 5.33E-03 | LOC102723828(dist=38598), LOC101928622(dist=1702335) | intergenic     |
| 9  | 36062369  | C | G | rs7043696            | 2.82E-05 | 0.108 | 0.077 | 1.46 | 1.18 - 1.8  | 9.62E-01 | 0.083 | 0.079 | 1.06 | 0.86 - 1.31 | 1.26 | 5.33E-03 | RECK                                                 | intergenic     |
| 17 | 33142821  | C | T | rs114704068          | 3.07E-05 | 0.048 | 0.082 | 0.57 | 0.43 - 0.74 | 7.20E-01 | 0.062 | 0.058 | 1.08 | 0.85 - 1.38 | 0.77 | 5.35E-03 | TMEM132E(dist=176479), CCT6B(dist=112057)            | intergenic     |
| 9  | 36116971  | G | A | rs16932947           | 2.99E-05 | 0.106 | 0.074 | 1.48 | 1.2 - 1.83  | 9.66E-01 | 0.086 | 0.081 | 1.07 | 0.87 - 1.32 | 1.26 | 5.36E-03 | RECK                                                 | intronic       |
| 9  | 36110220  | C | T | rs80043662           | 3.36E-05 | 0.106 | 0.074 | 1.48 | 1.19 - 1.83 | 9.51E-01 | 0.086 | 0.081 | 1.07 | 0.87 - 1.32 | 1.26 | 5.37E-03 | RECK                                                 | intronic       |
| 9  | 36109438  | C | T | rs75509067           | 3.39E-05 | 0.106 | 0.074 | 1.48 | 1.19 - 1.83 | 9.52E-01 | 0.086 | 0.081 | 1.07 | 0.87 - 1.32 | 1.26 | 5.39E-03 | RECK                                                 | intronic       |
| 15 | 90488672  | C | G | rs55780925           | 2.65E-05 | 0.071 | 0.046 | 1.57 | 1.21 - 2.03 | 7.39E-01 | 0.073 | 0.072 | 1.01 | 0.8 - 1.26  | 1.34 | 5.40E-03 | C15orf38-AP3S2(dist=32450), ZNF710(dist=56051)       | intergenic     |
| 15 | 90488704  | G | A | rs55657935           | 2.66E-05 | 0.071 | 0.046 | 1.57 | 1.21 - 2.03 | 7.39E-01 | 0.073 | 0.072 | 1.01 | 0.8 - 1.26  | 1.34 | 5.40E-03 | C15orf38-AP3S2(dist=32482), ZNF710(dist=56019)       | intergenic     |
| 2  | 195985514 | G | A | rs2667145            | 5.33E-05 | 0.236 | 0.195 | 1.28 | 1.1 - 1.48  | 8.95E-01 | 0.187 | 0.179 | 1.06 | 0.91 - 1.23 | 1.18 | 5.41E-03 | LOC101927431(dist=359355), SLC39A10(dist=536018)     | intergenic     |
| 9  | 36107312  | C | T | rs116361480          | 3.43E-05 | 0.106 | 0.074 | 1.48 | 1.19 - 1.83 | 9.53E-01 | 0.086 | 0.081 | 1.07 | 0.87 - 1.32 | 1.26 | 5.42E-03 | RECK                                                 | intronic       |
| 9  | 36107326  | C | T | rs144314788          | 3.43E-05 | 0.106 | 0.074 | 1.48 | 1.19 - 1.83 | 9.53E-01 | 0.086 | 0.081 | 1.07 | 0.87 - 1.32 | 1.26 | 5.42E-03 | RECK                                                 | intronic       |
| 6  | 29558403  | G | T | rs556403070;rs362519 | 4.10E-05 | 0.011 | 0.030 | 0.37 | 0.22 - 0.62 | 9.61E-01 | 0.028 | 0.026 | 1.06 | 0.74 - 1.52 | 0.65 | 5.42E-03 | OR2H2(dist=1658), GABBR1(dist=11602)                 | intergenic     |
| 9  | 36106483  | C | T | rs138979403          | 3.45E-05 | 0.106 | 0.074 | 1.48 | 1.19 - 1.83 | 9.54E-01 | 0.086 | 0.081 | 1.07 | 0.87 - 1.32 | 1.26 | 5.43E-03 | RECK                                                 | intronic       |
| 9  | 36106391  | C | G | rs150693460          | 3.46E-05 | 0.106 | 0.074 | 1.48 | 1.19 - 1.83 | 9.54E-01 | 0.086 | 0.081 | 1.07 | 0.87 - 1.32 | 1.26 | 5.43E-03 | RECK                                                 | intronic       |
| 9  | 36105933  | A | G | rs116009041          | 3.46E-05 | 0.106 | 0.074 | 1.48 | 1.19 - 1.83 | 9.54E-01 | 0.086 | 0.081 | 1.07 | 0.87 - 1.32 | 1.26 | 5.44E-03 | RECK                                                 | intronic       |
| 10 | 12736518  | T | G | rs144093821          | 4.46E-05 | 0.186 | 0.149 | 1.31 | 1.11 - 1.54 | 7.19E-01 | 0.178 | 0.175 | 1.02 | 0.88 - 1.19 | 1.25 | 5.44E-03 | CAMK1D                                               | intronic       |
| 9  | 36105959  | G | C | rs7874238            | 3.47E-05 | 0.106 | 0.074 | 1.48 | 1.19 - 1.83 | 9.54E-01 | 0.086 | 0.081 | 1.07 | 0.87 - 1.32 | 1.26 | 5.44E-03 | RECK                                                 | intronic       |
| 9  | 36089222  | C | G | rs16932922           | 5.02E-05 | 0.104 | 0.073 | 1.47 | 1.18 - 1.82 | 9.34E-01 | 0.084 | 0.079 | 1.07 | 0.87 - 1.33 | 1.26 | 5.46E-03 | RECK                                                 | intronic       |
| 14 | 63893902  | T | C | rs112779408          | 2.43E-05 | 0.045 | 0.028 | 1.66 | 1.2 - 2.3   | 7.29E-01 | 0.029 | 0.029 | 1.00 | 0.71 - 1.42 | 1.54 | 5.48E-03 | PPP2R5E                                              | intronic       |
| 4  | 68196784  | G | C | rs873174             | 5.58E-01 | 0.253 | 0.261 | 0.96 | 0.83 - 1.11 | 1.33E-05 | 0.295 | 0.244 | 1.30 | 1.14 - 1.48 | 1.15 | 5.48E-03 | MIR1269A(dist=1054138), LOC101927237(dist=86239)     | intergenic     |
| 11 | 7857379   | A | C | rs2361059            | 8.19E-01 | 0.371 | 0.352 | 1.09 | 0.96 - 1.24 | 2.66E-05 | 0.315 | 0.387 | 0.73 | 0.64 - 0.82 | 0.88 | 5.48E-03 | OR5P3(dist=9860), OR5E1P(dist=13219)                 | intergenic     |
| 9  | 36121169  | C | T | rs76725802           | 2.82E-05 | 0.105 | 0.073 | 1.49 | 1.2 - 1.84  | 9.81E-01 | 0.086 | 0.081 | 1.07 | 0.86 - 1.32 | 1.26 | 5.49E-03 | RECK                                                 | intronic       |
| 9  | 36120992  | C | T | rs78292072           | 2.83E-05 | 0.105 | 0.073 | 1.49 | 1.2 - 1.84  | 9.81E-01 | 0.086 | 0.081 | 1.07 | 0.86 - 1.32 | 1.26 | 5.49E-03 | RECK                                                 | intronic       |
| 9  | 36120507  | C | T | rs7871269            | 2.84E-05 | 0.105 | 0.073 | 1.49 | 1.2 - 1.84  | 9.82E-01 | 0.086 | 0.081 | 1.07 | 0.86 - 1.32 | 1.26 | 5.51E-03 | RECK                                                 | intronic       |
| 9  | 36119301  | A | G | rs78979925           | 2.88E-05 | 0.105 | 0.074 | 1.49 | 1.2 - 1.84  | 9.80E-01 | 0.086 | 0.081 | 1.07 | 0.86 - 1.32 | 1.26 | 5.52E-03 | RECK                                                 | intronic       |
| 17 | 33143329  | C | T | rs116928751          | 2.49E-05 | 0.048 | 0.083 | 0.56 | 0.43 - 0.74 | 6.63E-01 | 0.063 | 0.058 | 1.09 | 0.85 - 1.39 | 0.77 | 5.53E-03 | TMEM132E(dist=176987), CCT6B(dist=111549)            | intergenic     |
| 9  | 36119813  | C | A | rs7032702            | 2.86E-05 | 0.105 | 0.073 | 1.49 | 1.2 - 1.84  | 9.82E-01 | 0.086 | 0.081 | 1.07 | 0.86 - 1.32 | 1.26 | 5.53E-03 | RECK                                                 | intronic       |
| 10 | 37264608  | A | T | rs2504392            | 2.29E-05 | 0.329 | 0.250 | 1.47 | 1.28 - 1.68 | 9.28E-01 | 0.308 | 0.316 | 0.96 | 0.85 - 1.09 | 1.17 | 5.54E-03 | LINC01452(dist=1174760), ANKRD30A(dist=150177)       | intergenic     |
| 9  | 35388399  | C | T | rs146193932          | 9.96E-01 | 0.028 | 0.030 | 0.94 | 0.65 - 1.37 | 2.69E-05 | 0.037 | 0.021 | 1.75 | 1.26 - 2.44 | 1.64 | 5.55E-03 | UNC13B                                               | intronic       |
| 7  | 113547890 | T | G | rs7792710            | 7.88E-01 | 0.448 | 0.458 | 1.04 | 0.92 - 1.18 | 1.86E-05 | 0.498 | 0.435 | 0.78 | 0.69 - 0.87 | 0.88 | 5.55E-03 | PPP1R3A                                              | intronic       |
| 4  | 122563134 | C | G | rs4833228            | 8.01E-01 | 0.250 | 0.244 | 1.03 | 0.9 - 1.19  | 3.83E-05 | 0.213 | 0.269 | 0.74 | 0.64 - 0.85 | 0.86 | 5.55E-03 | QRFPR(dist=260953), ANXA5(dist=26018)                | intergenic     |
| 2  | 102935974 | G | A | rs11693204           | 8.91E-01 | 0.095 | 0.084 | 1.14 | 0.92 - 1.41 | 5.81E-05 | 0.075 | 0.118 | 0.60 | 0.49 - 0.75 | 0.80 | 5.56E-03 | IL1RL1                                               | intronic       |
| 6  | 67797147  | G | T | rs2503907            | 7.59E-06 | 0.015 | 0.034 | 2.31 | 1.46 - 3.66 | 7.30E-01 | 0.035 | 0.041 | 1.17 | 0.85 - 1.6  | 1.45 | 5.56E-03 | SLC25A51P1(dist=1297771), LOC102723883(dist=968096)  | intergenic     |
| 17 | 33289860  | T | C | rs75082391           | 4.02E-05 | 0.049 | 0.083 | 0.57 | 0.43 - 0.74 | 7.99E-01 | 0.063 | 0.059 | 1.07 | 0.84 - 1.36 | 0.77 | 5.57E-03 | ZNF830(NM_052857:c.*156T>C)                          | UTR3           |
| 2  | 195986603 | A | G | rs777729             | 4.63E-05 | 0.239 | 0.197 | 1.28 | 1.1 - 1.48  | 8.63E-01 | 0.188 | 0.180 | 1.06 | 0.91 - 1.23 | 1.18 | 5.57E-03 | LOC101927431(dist=360444), SLC39A10(dist=534929)     | intergenic     |
| 4  | 106596685 | T | C | rs73837092           | 5.31E-05 | 0.056 | 0.033 | 1.73 | 1.29 - 2.33 | 9.72E-01 | 0.042 | 0.044 | 0.95 | 0.71 - 1.27 | 1.38 | 5.57E-03 | ARHGFEF38                                            | intronic       |
| 1  | 198189725 | A | C | rs79508957           | 8.68E-06 | 0.047 | 0.026 | 1.88 | 1.36 - 2.61 | 6.74E-01 | 0.031 | 0.031 | 1.00 | 0.72 - 1.4  | 1.45 | 5.59E-03 | NEK7                                                 | intronic       |
| 15 | 90481350  | T | C | rs4932267            | 1.19E-05 | 0.069 | 0.044 | 1.60 | 1.23 - 2.08 | 6.47E-01 | 0.072 | 0.072 | 1.00 | 0.79 - 1.25 | 1.35 | 5.61E-03 | C15orf38-AP3S2(dist=25128), ZNF710(dist=63373)       | intergenic     |
| 15 | 90481937  | G | A | rs4932268            | 1.19E-05 | 0.069 | 0.044 | 1.60 | 1.23 - 2.08 | 6.46E-01 | 0.072 | 0.072 | 1.00 | 0.79 - 1.25 | 1.35 | 5.62E-03 | C15orf38-AP3S2(dist=25715), ZNF710(dist=62786)       | intergenic     |
| 8  | 124196394 | C | T | rs62521842           | 7.00E-01 | 0.056 | 0.053 | 1.08 | 0.82 - 1.41 | 4.23E-05 | 0.086 | 0.064 | 1.38 | 1.12 - 1.71 | 1.32 | 5.67E-03 | FAM83A                                               | intronic       |
| 1  | 198619859 | T | C | rs76306126           | 5.20E-05 | 0.044 | 0.025 | 1.78 | 1.27 - 2.48 | 9.58E-01 | 0.031 | 0.030 | 1.06 | 0.76 - 1.49 | 1.46 | 5.67E-03 | PTPRC                                                | intronic       |
| 3  | 64013342  | G | A | rs35838              | 7.08E-01 | 0.394 | 0.382 | 0.95 | 0.84 - 1.08 | 2.90E-05 | 0.349 | 0.409 | 1.30 | 1.15 - 1.46 | 1.14 | 5.68E-03 | PSMD6(dist=3656), PRICKLE2-AS1(dist=40298)           | intergenic     |
| 10 | 25579331  | A | T | rs78104485           | 6.14E-05 | 0.172 | 0.219 | 0.74 | 0.63 - 0.87 | 9.31E-01 | 0.191 | 0.192 | 1.00 | 0.86 - 1.15 | 0.83 | 5.69E-03 | GPR158                                               | intronic       |
| 6  | 96852189  | G | C | rs9486165            | 9.61E-01 | 0.427 | 0.425 | 1.01 | 0.89 - 1.14 | 5.36E-05 | 0.464 | 0.418 | 1.21 | 1.07 - 1.36 | 1.14 | 5.70E-03 | FUT9(dist=188701), UFL1(dist=117513)                 | intergenic     |
| 9  | 8831898   | T | C | rs7861223            | 2.22E-05 | 0.072 | 0.046 | 1.64 | 1.26 - 2.12 | 6.81E-01 | 0.042 | 0.042 | 1.00 | 0.75 - 1.34 | 1.36 | 5.70E-03 | PTPRD                                                | intronic       |
| 5  | 68304658  | C | A | rs4563578            | 9.50E-01 | 0.504 | 0.491 | 1.05 | 0.93 - 1.19 | 4.32E-05 | 0.520 | 0.449 | 0.75 | 0.67 - 0.85 | 0.88 | 5.72E-03 | LOC101928885                                         | ncRNA_intronic |
| 5  | 40960962  | A | T | rs12187430           | 5.77E-05 | 0.061 | 0.032 | 1.95 | 1.46 - 2.61 | 9.76E-01 | 0.045 | 0.050 | 0.91 | 0.69 - 1.2  | 1.37 | 5.72E-03 | C7                                                   | intronic       |
| 8  | 18393734  | A | C | rs115072991          | 5.92E-01 | 0.047 | 0.053 | 0.88 | 0.66 - 1.18 | 1.29E-05 | 0.075 | 0.045 | 1.73 | 1.37 - 2.19 | 1.34 | 5.73E-03 | PSD3                                                 | intronic       |
| 19 | 16095969  | T | C | rs10412406           | 3.28E-06 | 0.326 | 0.270 | 1.31 | 1.14 - 1.5  | 3.52E-01 | 0.237 | 0.237 | 1.00 | 0.87 - 1.15 | 1.17 | 5.73E-03 | OR10H4(dist=35201), LINC00661(dist=30475)            | intergenic     |
| 6  | 148948923 | G | A | rs12528752           |          |       |       |      |             |          |       |       |      |             |      |          |                                                      |                |

|    |           |   |   |             |          |       |       |      |      |       |          |         |       |      |      |       |      |          |                                               |                |
|----|-----------|---|---|-------------|----------|-------|-------|------|------|-------|----------|---------|-------|------|------|-------|------|----------|-----------------------------------------------|----------------|
| 10 | 49794718  | C | T | rs1345106   | 3.79E-05 | 0.274 | 0.211 | 1.41 | 1.22 | -1.63 | 8.05E-01 | 0.245   | 0.250 | 0.98 | 0.85 | -1.12 | 1.17 | 5.75E-03 | ARHGAP22                                      | intronic       |
| 1  | 198606892 | G | C | rs114368190 | 5.95E-05 | 0.041 | 0.024 | 1.78 | 1.26 | -2.51 | 9.88E-01 | 0.031   | 0.029 | 1.08 | 0.77 | -1.52 | 1.48 | 5.77E-03 | ATP6V1G3(dist=96817), PTPRC(dist=1206)        | intergenic     |
| 17 | 33110481  | G | A | rs111515563 | 6.32E-05 | 0.048 | 0.080 | 0.58 | 0.44 | -0.76 | 8.21E-01 | 0.059   | 0.056 | 1.06 | 0.83 | -1.36 | 0.77 | 5.77E-03 | TMEM132E(dist=144139), CCT6B(dist=144397)     | intergenic     |
| 1  | 198153784 | T | A | rs75803260  | 9.78E-06 | 0.042 | 0.022 | 1.92 | 1.36 | -2.72 | 6.82E-01 | 0.027   | 0.027 | 1.00 | 0.7  | -1.44 | 1.48 | 5.80E-03 | NEK7                                          | intronic       |
| 11 | 39330549  | G | A | rs150097779 | 1.03E-05 | 0.125 | 0.092 | 1.41 | 1.16 | -1.72 | 6.26E-01 | 0.090   | 0.088 | 1.02 | 0.83 | -1.25 | 1.25 | 5.80E-03 | LINC01493(dist=653750), LRRRC4C(dist=805202)  | intergenic     |
| 10 | 124511646 | A | G | rs10794612  | 3.31E-05 | 0.447 | 0.492 | 0.83 | 0.74 | -0.94 | 7.83E-01 | 0.491   | 0.474 | 0.93 | 0.83 | -1.05 | 0.88 | 5.83E-03 | C10orf120(dist=52308), DMBT1P1(dist=4564)     | intergenic     |
| 3  | 168390304 | G | A | rs13079357  | 8.01E-01 | 0.114 | 0.106 | 0.92 | 0.76 | -1.12 | 4.94E-05 | 0.163   | 0.132 | 0.79 | 0.67 | -0.92 | 0.82 | 5.87E-03 | EGFEM1P                                       | ncRNA_intronic |
| 13 | 100428884 | T | C | rs7998536   | 8.17E-01 | 0.266 | 0.268 | 1.01 | 0.88 | -1.16 | 5.10E-05 | 0.224   | 0.273 | 1.30 | 1.13 | -1.49 | 1.15 | 5.88E-03 | LOC101927437                                  | ncRNA_intronic |
| 19 | 51370543  | A | C | rs2739468   | 6.76E-01 | 0.330 | 0.332 | 1.01 | 0.89 | -1.15 | 4.47E-05 | 0.389   | 0.336 | 0.79 | 0.7  | -0.9  | 0.88 | 5.92E-03 | KLK3(dist=6523), KLK2(dist=6146)              | intergenic     |
| 9  | 36123655  | A | G | rs74725990  | 3.12E-05 | 0.104 | 0.073 | 1.48 | 1.19 | -1.83 | 9.76E-01 | 0.086   | 0.081 | 1.07 | 0.87 | -1.32 | 1.25 | 5.95E-03 | RECK(NM_021111:c.*613A>G)                     | UTR3           |
| 5  | 117767075 | A | T | rs56899033  | 6.79E-01 | 0.072 | 0.079 | 0.90 | 0.71 | -1.15 | 1.13E-05 | 0.098   | 0.063 | 1.62 | 1.32 | -1.99 | 1.29 | 5.96E-03 | LOC101927280                                  | ncRNA_intronic |
| 2  | 102946677 | A | G | rs56192435  | 8.67E-01 | 0.095 | 0.084 | 1.14 | 0.92 | -1.42 | 5.90E-05 | 0.075   | 0.118 | 0.60 | 0.49 | -0.75 | 0.81 | 5.96E-03 | IL1RL1                                        | intronic       |
| 14 | 63896998  | G | A | rs146696178 | 2.43E-05 | 0.038 | 0.021 | 1.84 | 1.28 | -2.63 | 7.08E-01 | 0.024   | 0.024 | 0.99 | 0.68 | -1.45 | 1.56 | 5.97E-03 | PPP2R5E                                       | intronic       |
| 14 | 56248455  | G | A | rs4144657   | 9.87E-01 | 0.089 | 0.091 | 0.98 | 0.79 | -1.22 | 2.96E-05 | 0.064   | 0.090 | 0.69 | 0.54 | -0.87 | 0.77 | 6.00E-03 | LINC00520                                     | ncRNA_exonic   |
| 19 | 51369587  | C | G | rs2569737   | 6.75E-01 | 0.330 | 0.332 | 1.01 | 0.89 | -1.15 | 4.59E-05 | 0.389   | 0.336 | 0.79 | 0.7  | -0.9  | 0.88 | 6.02E-03 | KLK3(dist=5567), KLK2(dist=7102)              | intergenic     |
| 4  | 122544530 | C | T | rs11728410  | 5.37E-01 | 0.247 | 0.237 | 1.06 | 0.92 | -1.22 | 1.58E-05 | 0.212   | 0.271 | 0.72 | 0.63 | -0.83 | 0.86 | 6.03E-03 | QRFPR(dist=242349), ANXA5(dist=44622)         | intergenic     |
| 9  | 36088339  | A | G | rs60096383  | 5.12E-05 | 0.104 | 0.073 | 1.47 | 1.18 | -1.82 | 9.77E-01 | 0.083   | 0.078 | 1.07 | 0.86 | -1.32 | 1.26 | 6.06E-03 | RECK                                          | intronic       |
| 9  | 36088354  | A | C | rs78481188  | 5.12E-05 | 0.104 | 0.073 | 1.47 | 1.18 | -1.82 | 9.77E-01 | 0.083   | 0.078 | 1.07 | 0.86 | -1.32 | 1.26 | 6.06E-03 | RECK                                          | intronic       |
| 9  | 36088126  | A | G | rs61240705  | 5.12E-05 | 0.104 | 0.073 | 1.47 | 1.18 | -1.82 | 9.78E-01 | 0.083   | 0.078 | 1.07 | 0.86 | -1.32 | 1.26 | 6.06E-03 | RECK                                          | intronic       |
| 9  | 36087269  | A | G | rs7044585   | 5.12E-05 | 0.104 | 0.073 | 1.47 | 1.18 | -1.82 | 9.78E-01 | 0.083   | 0.078 | 1.07 | 0.86 | -1.32 | 1.26 | 6.07E-03 | RECK                                          | intronic       |
| 9  | 36086548  | C | G | rs113120175 | 5.12E-05 | 0.104 | 0.073 | 1.47 | 1.18 | -1.82 | 9.78E-01 | 0.083   | 0.078 | 1.07 | 0.86 | -1.32 | 1.26 | 6.07E-03 | RECK                                          | intronic       |
| 13 | 109666357 | G | A | rs140914207 | 3.54E-05 | 0.054 | 0.033 | 1.65 | 1.23 | -2.23 | 6.75E-01 | 0.032   | 0.033 | 0.98 | 0.71 | -1.37 | 1.43 | 6.08E-03 | MYO16                                         | intronic       |
| 9  | 36085765  | G | A | rs7864265   | 5.12E-05 | 0.104 | 0.073 | 1.47 | 1.18 | -1.82 | 9.79E-01 | 0.083   | 0.078 | 1.07 | 0.86 | -1.32 | 1.26 | 6.08E-03 | RECK                                          | intronic       |
| 1  | 104414365 | G | A | rs7546561   | 9.19E-01 | 0.177 | 0.171 | 1.04 | 0.88 | -1.22 | 5.59E-05 | 0.219   | 0.188 | 1.21 | 1.05 | -1.4  | 1.19 | 6.11E-03 | AMY1A(dist=113054), LOC100129138(dist=201280) | intergenic     |
| 9  | 36082548  | T | C | rs6476521   | 5.13E-05 | 0.104 | 0.073 | 1.47 | 1.18 | -1.82 | 9.81E-01 | 0.083   | 0.078 | 1.07 | 0.86 | -1.32 | 1.26 | 6.11E-03 | RECK                                          | intronic       |
| 18 | 72271712  | T | A | rs7507023   | 2.35E-05 | 0.135 | 0.187 | 1.47 | 1.24 | -1.75 | 7.17E-01 | 0.160   | 0.155 | 0.97 | 0.82 | -1.14 | 1.18 | 6.11E-03 | LINC00909(dist=6641), ZNF407(dist=71207)      | intergenic     |
| 14 | 104941720 | G | A | rs114756268 | 9.99E-01 | 0.046 | 0.048 | 0.97 | 0.72 | -1.3  | 3.16E-05 | 0.054   | 0.033 | 1.66 | 1.26 | -2.18 | 1.44 | 6.11E-03 | KIF26A(dist=294485), C14orf180(dist=104301)   | intergenic     |
| 9  | 36080488  | G | A | rs7045429   | 5.13E-05 | 0.104 | 0.073 | 1.47 | 1.18 | -1.82 | 9.81E-01 | 0.083   | 0.078 | 1.07 | 0.86 | -1.32 | 1.26 | 6.12E-03 | RECK                                          | intronic       |
| 16 | 85089570  | A | C | rs11647328  | 8.43E-01 | 0.398 | 0.384 | 0.94 | 0.83 | -1.07 | 5.83E-05 | 0.355   | 0.422 | 1.33 | 1.18 | -1.5  | 1.14 | 6.12E-03 | KIAA0513                                      | intronic       |
| 19 | 16087057  | C | T | rs28739565  | 6.93E-06 | 0.328 | 0.273 | 1.30 | 1.14 | -1.49 | 3.84E-01 | 0.243   | 0.242 | 1.01 | 0.88 | -1.15 | 1.17 | 6.13E-03 | OR10H4(dist=26289), LINC00661(dist=39387)     | intergenic     |
| 9  | 36079682  | G | A | rs7033789   | 5.13E-05 | 0.104 | 0.073 | 1.47 | 1.18 | -1.82 | 9.82E-01 | 0.083   | 0.078 | 1.07 | 0.86 | -1.32 | 1.26 | 6.13E-03 | RECK                                          | intronic       |
| 9  | 36070001  | T | G | rs77056327  | 5.08E-05 | 0.104 | 0.073 | 1.47 | 1.18 | -1.82 | 9.84E-01 | 0.083   | 0.078 | 1.07 | 0.86 | -1.32 | 1.26 | 6.13E-03 | RECK                                          | intronic       |
| 9  | 36079437  | G | C | rs7033516   | 5.14E-05 | 0.104 | 0.073 | 1.47 | 1.18 | -1.82 | 9.82E-01 | 0.083   | 0.078 | 1.07 | 0.86 | -1.32 | 1.26 | 6.14E-03 | RECK                                          | intronic       |
| 9  | 36079443  | C | T | rs7033299   | 5.14E-05 | 0.104 | 0.073 | 1.47 | 1.18 | -1.82 | 9.82E-01 | 0.083   | 0.078 | 1.07 | 0.86 | -1.32 | 1.26 | 6.14E-03 | RECK                                          | intronic       |
| 9  | 36078464  | C | G | rs78729864  | 5.14E-05 | 0.104 | 0.073 | 1.47 | 1.18 | -1.82 | 9.83E-01 | 0.083   | 0.078 | 1.07 | 0.86 | -1.32 | 1.26 | 6.15E-03 | RECK                                          | intronic       |
| 9  | 36078782  | G | A | rs7857218   | 5.14E-05 | 0.104 | 0.073 | 1.47 | 1.18 | -1.82 | 9.83E-01 | 0.083   | 0.078 | 1.07 | 0.86 | -1.32 | 1.26 | 6.15E-03 | RECK                                          | intronic       |
| 9  | 36078286  | G | T | rs76361447  | 5.14E-05 | 0.104 | 0.073 | 1.47 | 1.18 | -1.82 | 9.83E-01 | 0.083   | 0.078 | 1.07 | 0.86 | -1.32 | 1.26 | 6.15E-03 | RECK                                          | intronic       |
| 9  | 36069584  | A | C | rs80006684  | 5.13E-05 | 0.104 | 0.073 | 1.47 | 1.18 | -1.82 | 9.84E-01 | 0.083   | 0.078 | 1.07 | 0.86 | -1.32 | 1.26 | 6.15E-03 | RECK                                          | intronic       |
| 9  | 36069279  | G | A | rs111788582 | 5.14E-05 | 0.104 | 0.073 | 1.47 | 1.18 | -1.82 | 9.84E-01 | 0.083   | 0.078 | 1.07 | 0.86 | -1.32 | 1.26 | 6.15E-03 | RECK                                          | intronic       |
| 4  | 92464138  | G | C | rs9995601   | 4.63E-01 | 0.081 | 0.087 | 0.92 | 0.73 | -1.15 | 6.31E-06 | 0.119   | 0.078 | 1.60 | 1.32 | -1.93 | 1.26 | 6.15E-03 | CCSER1                                        | intronic       |
| 9  | 36076713  | T | A | rs78032771  | 5.13E-05 | 0.104 | 0.073 | 1.47 | 1.18 | -1.82 | 9.83E-01 | 0.083   | 0.078 | 1.07 | 0.86 | -1.32 | 1.26 | 6.15E-03 | RECK                                          | intronic       |
| 16 | 85089684  | A | G | rs11647376  | 8.43E-01 | 0.398 | 0.384 | 0.94 | 0.83 | -1.07 | 5.87E-05 | 0.355   | 0.422 | 1.33 | 1.18 | -1.5  | 1.14 | 6.15E-03 | KIAA0513                                      | intronic       |
| 9  | 36066856  | A | G | rs10511926  | 5.16E-05 | 0.104 | 0.073 | 1.47 | 1.18 | -1.82 | 9.83E-01 | 0.083   | 0.078 | 1.07 | 0.86 | -1.32 | 1.26 | 6.15E-03 | RECK                                          | intronic       |
| 9  | 36075306  | C | A | rs7873427   | 5.12E-05 | 0.104 | 0.073 | 1.47 | 1.18 | -1.82 | 9.84E-01 | 0.083   | 0.078 | 1.07 | 0.86 | -1.32 | 1.26 | 6.16E-03 | RECK                                          | intronic       |
| 9  | 36075393  | A | G | rs7873363   | 5.12E-05 | 0.104 | 0.073 | 1.47 | 1.18 | -1.82 | 9.84E-01 | 0.083   | 0.078 | 1.07 | 0.86 | -1.32 | 1.26 | 6.16E-03 | RECK                                          | intronic       |
| 9  | 36071408  | T | C | rs74890745  | 5.12E-05 | 0.104 | 0.073 | 1.47 | 1.18 | -1.82 | 9.84E-01 | 0.083   | 0.078 | 1.07 | 0.86 | -1.32 | 1.26 | 6.16E-03 | RECK                                          | intronic       |
| 9  | 36074919  | G | T | rs7870134   | 5.12E-05 | 0.104 | 0.073 | 1.47 | 1.18 | -1.82 | 9.84E-01 | 0.083   | 0.078 | 1.07 | 0.86 | -1.32 | 1.26 | 6.16E-03 | RECK                                          | intronic       |
| 9  | 36074073  | G | A | rs78228680  | 5.12E-05 | 0.104 | 0.073 | 1.47 | 1.18 | -1.82 | 9.85E-01 | 0.083   | 0.078 | 1.07 | 0.86 | -1.32 | 1.26 | 6.17E-03 | RECK                                          | intronic       |
| 8  | 128430501 | C | T | rs34668661  | 9.02E-01 | 0.128 | 0.121 | 1.06 | 0.88 | -1.28 | 5.39E-05 | 0.091   | 0.129 | 0.68 | 0.56 | -0.83 | 0.82 | 6.19E-03 | CASC8                                         | ncRNA_intronic |
| 17 | 33153010  | G | A | rs118008163 | 3.37E-05 | 0.048 | 0.082 | 0.57 | 0.43 | -0.74 | 6.85E-01 | 0.062   | 0.058 | 1.09 | 0.85 | -1.39 | 0.77 | 6.20E-03 | TMEM132E(dist=186668), CCT6B(dist=101868)     | intergenic     |
| 4  | 35969905  | G | A | rs1714088   | 5.72E-06 | 0.172 | 0.121 | 0.66 | 0.56 | -0.79 | 6.84E-01 | 0.152   | 0.166 | 1.11 | 0.94 | -1.3  | 0.84 | 6.21E-03 | LOC101928622(dist=1928390), ARAP2(dist=97715) | intergenic     |
| 8  | 124198673 | C | T | rs62521844  | 6.67E-01 | 0.056 | 0.053 | 1.06 | 0.81 | -1.4  | 4.15E-05 | 0.086   | 0.064 | 1.38 | 1.11 | -1.71 | 1.32 | 6.21E-03 | FAM83A                                        | intronic       |
| 8  | 38818557  | T | G | rs56300006  | 6.39E-01 | 0.077 | 0.087 | 0.88 | 0.7  | -1.11 | 1.35E-05 | 0.115   | 0.076 | 1.57 | 1.3  | -1.9  | 1.26 | 6.23E-03 | PLEKHA2                                       | intronic       |
| 8  | 38819805  | G | A | rs73674665  | 6.35E-01 | 0.077 | 0.087 | 0.88 | 0.7  | -1.11 | 1.30E-05 | 0.115   | 0.076 | 1.57 | 1.3  | -1.9  | 1.26 | 6.23E-03 | PLEKHA2                                       | intronic       |
| 9  | 14269426  | G | C | rs116783483 | 8.80E-01 | 0.028 | 0.031 | 0.90 | 0.63 | -1.31 | 2.23E-05 | 0.041   | 0.023 | 1.80 | 1.31 | -2.47 | 1.53 | 6.24E-03 | NFIB                                          | intronic       |
| 9  | 35419179  | G | A | rs76843223  | 6.85E-01 | 0.041 | 0.042 | 0.97 | 0.71 | -1.32 | 1.18E-05 | 0.056   | 0.034 | 1.68 | 1.29 | -2.2  | 1.40 | 6.24E-03 | ATP8B5P                                       | ncRNA_intronic |
| 9  | 36065718  | A | G | rs78998877  | 5.29E-05 | 0.104 | 0.073 | 1.47 | 1.18 | -1.82 | 9.84E-01 | 0.083   | 0.078 | 1.07 | 0.86 | -1.32 | 1.26 | 6.24E-03 | RECK                                          | intronic       |
| 9  | 36064398  | T | C | rs7037965   | 5.30E-05 | 0.104 | 0.073 | 1.47 | 1.18 | -1.82 | 9.84E-01 | 0.083   | 0.078 | 1.07 | 0.86 | -1.32 | 1.26 | 6.25E-03 | RECK                                          | intronic       |
| 9  | 36063889  | T | C | rs16932881  | 5.31E-05 | 0.104 | 0.073 | 1.47 | 1.18 | -1.82 | 9.84E-01 | 0.083</ |       |      |      |       |      |          |                                               |                |



|    |           |   |   |                       |          |       |       |      |      |       |          |       |       |      |      |       |      |          |                                                      |                |
|----|-----------|---|---|-----------------------|----------|-------|-------|------|------|-------|----------|-------|-------|------|------|-------|------|----------|------------------------------------------------------|----------------|
| 19 | 16086403  | A | T | rs73509820            | 1.29E-05 | 0.367 | 0.311 | 1.28 | 1.13 | -1.46 | 4.98E-01 | 0.280 | 0.276 | 1.02 | 0.9  | -1.16 | 1.16 | 6.35E-03 | OR10H4(dist=25635), LINC00661(dist=40041)            | intergenic     |
| 10 | 25579144  | C | G | rs79708540            | 6.34E-05 | 0.169 | 0.217 | 0.74 | 0.63 | -0.87 | 9.50E-01 | 0.189 | 0.189 | 1.00 | 0.86 | -1.16 | 0.83 | 6.35E-03 | GPR158                                               | intronic       |
| 19 | 16086390  | A | C | rs76188286            | 1.29E-05 | 0.367 | 0.311 | 1.28 | 1.13 | -1.46 | 4.98E-01 | 0.280 | 0.276 | 1.02 | 0.9  | -1.16 | 1.16 | 6.36E-03 | OR10H4(dist=25622), LINC00661(dist=40054)            | intergenic     |
| 5  | 40983057  | G | T | rs60001990            | 3.71E-05 | 0.061 | 0.032 | 1.98 | 1.48 | -2.65 | 9.15E-01 | 0.048 | 0.054 | 0.90 | 0.68 | -1.17 | 1.36 | 6.37E-03 | C7                                                   | downstream     |
| 5  | 117862938 | A | G | rs4587104             | 8.32E-01 | 0.125 | 0.114 | 0.90 | 0.74 | -1.09 | 5.87E-05 | 0.109 | 0.159 | 1.55 | 1.29 | -1.86 | 1.21 | 6.40E-03 | LOC101927280                                         | ncRNA_intronic |
| 9  | 36123129  | T | G | rs7042392             | 3.67E-05 | 0.104 | 0.073 | 1.47 | 1.19 | -1.83 | 9.78E-01 | 0.086 | 0.081 | 1.07 | 0.86 | -1.32 | 1.25 | 6.43E-03 | RECK(NM_021111:c."87T>G)                             | UTR3           |
| 17 | 33264298  | T | C | rs115194317           | 5.96E-05 | 0.049 | 0.082 | 0.57 | 0.44 | -0.75 | 8.07E-01 | 0.063 | 0.059 | 1.07 | 0.84 | -1.36 | 0.78 | 6.43E-03 | CCT6B                                                | intronic       |
| 17 | 33196834  | G | A | rs116740585           | 5.97E-05 | 0.049 | 0.082 | 0.57 | 0.44 | -0.75 | 8.04E-01 | 0.063 | 0.059 | 1.07 | 0.84 | -1.36 | 0.78 | 6.43E-03 | TMEM132E(dist=230492), CCT6B(dist=58044)             | intergenic     |
| 1  | 198638542 | G | C | rs76317261            | 4.64E-05 | 0.043 | 0.024 | 1.81 | 1.29 | -2.54 | 9.25E-01 | 0.032 | 0.030 | 1.05 | 0.75 | -1.47 | 1.44 | 6.44E-03 | PTPRC                                                | intronic       |
| 9  | 36062456  | T | C | rs7029409             | 5.68E-05 | 0.104 | 0.074 | 1.46 | 1.18 | -1.81 | 9.87E-01 | 0.083 | 0.078 | 1.07 | 0.86 | -1.32 | 1.26 | 6.50E-03 | RECK                                                 | intronic       |
| 16 | 85090307  | G | A | rs9939536             | 8.30E-01 | 0.399 | 0.384 | 0.94 | 0.83 | -1.07 | 6.09E-05 | 0.356 | 0.424 | 1.33 | 1.18 | -1.5  | 1.14 | 6.52E-03 | KIAA0513                                             | intronic       |
| 17 | 33210734  | A | G | rs116509107           | 6.28E-05 | 0.049 | 0.082 | 0.57 | 0.44 | -0.75 | 8.11E-01 | 0.063 | 0.059 | 1.07 | 0.84 | -1.36 | 0.78 | 6.54E-03 | TMEM132E(dist=244392), CCT6B(dist=44144)             | intergenic     |
| 1  | 198258187 | G | C | rs115359978           | 5.94E-05 | 0.051 | 0.030 | 1.73 | 1.27 | -2.36 | 9.42E-01 | 0.037 | 0.035 | 1.06 | 0.78 | -1.45 | 1.40 | 6.56E-03 | NEK7                                                 | intronic       |
| 2  | 65950183  | C | A | rs62139656            | 3.33E-05 | 0.057 | 0.071 | 0.79 | 0.61 | -1.02 | 6.51E-01 | 0.070 | 0.075 | 0.94 | 0.75 | -1.18 | 0.72 | 6.56E-03 | SPRED2(dist=290527), MIR4778(dist=635198)            | intergenic     |
| 2  | 69847898  | C | G | rs114249509           | 6.58E-06 | 0.051 | 0.029 | 1.84 | 1.35 | -2.52 | 5.05E-01 | 0.028 | 0.030 | 0.92 | 0.65 | -1.31 | 1.43 | 6.62E-03 | AAK1                                                 | intronic       |
| 9  | 36080077  | G | T | rs7044935             | 5.28E-05 | 0.102 | 0.072 | 1.47 | 1.18 | -1.82 | 9.93E-01 | 0.081 | 0.076 | 1.07 | 0.86 | -1.32 | 1.26 | 6.65E-03 | RECK                                                 | intronic       |
| 5  | 117742601 | G | A | rs114736670           | 6.08E-01 | 0.069 | 0.078 | 0.87 | 0.69 | -1.11 | 3.54E-06 | 0.088 | 0.053 | 1.71 | 1.37 | -2.12 | 1.30 | 6.66E-03 | LOC101927280                                         | ncRNA_intronic |
| 5  | 117742617 | C | T | rs115318991           | 6.09E-01 | 0.069 | 0.078 | 0.87 | 0.69 | -1.11 | 3.54E-06 | 0.088 | 0.053 | 1.71 | 1.37 | -2.12 | 1.30 | 6.66E-03 | LOC101927280                                         | ncRNA_intronic |
| 9  | 8829806   | G | C | rs115850002           | 1.78E-05 | 0.080 | 0.051 | 1.62 | 1.26 | -2.07 | 6.95E-01 | 0.051 | 0.050 | 1.01 | 0.77 | -1.32 | 1.31 | 6.68E-03 | PTPRD                                                | intronic       |
| 2  | 69835516  | A | G | rs79146779            | 2.05E-06 | 0.053 | 0.029 | 1.86 | 1.37 | -2.53 | 4.09E-01 | 0.031 | 0.034 | 0.91 | 0.65 | -1.27 | 1.41 | 6.69E-03 | AAK1                                                 | intronic       |
| 1  | 28590691  | T | G | rs4515102             | 9.46E-01 | 0.332 | 0.328 | 0.98 | 0.86 | -1.12 | 4.96E-05 | 0.375 | 0.334 | 0.84 | 0.74 | -0.94 | 0.87 | 6.72E-03 | SESN2                                                | intronic       |
| 1  | 198636882 | T | A | rs77343094            | 6.07E-05 | 0.043 | 0.024 | 1.79 | 1.28 | -2.52 | 9.35E-01 | 0.032 | 0.030 | 1.05 | 0.75 | -1.48 | 1.44 | 6.77E-03 | PTPRC                                                | intronic       |
| 4  | 68196681  | G | A | rs873173              | 4.97E-01 | 0.255 | 0.263 | 0.96 | 0.83 | -1.1  | 1.43E-05 | 0.293 | 0.242 | 1.30 | 1.14 | -1.48 | 1.15 | 6.78E-03 | MIR1269A(dist=1054035), LOC101927237(dist=86342)     | intergenic     |
| 2  | 212366838 | T | C | rs59546274            | 7.90E-01 | 0.170 | 0.171 | 0.99 | 0.84 | -1.17 | 4.64E-05 | 0.180 | 0.142 | 1.32 | 1.13 | -1.54 | 1.21 | 6.79E-03 | ERBB4                                                | intronic       |
| 4  | 35969632  | T | C | rs1714089             | 5.03E-06 | 0.170 | 0.119 | 0.66 | 0.55 | -0.78 | 6.39E-01 | 0.145 | 0.160 | 1.12 | 0.95 | -1.32 | 0.84 | 6.80E-03 | LOC101928622(dist=1928117), ARAP2(dist=97988)        | intergenic     |
| 12 | 44231547  | C | T | rs79840824            | 6.76E-01 | 0.066 | 0.072 | 0.90 | 0.71 | -1.16 | 4.31E-05 | 0.099 | 0.062 | 1.65 | 1.34 | -2.02 | 1.27 | 6.81E-03 | TMEM117                                              | intronic       |
| 17 | 33294069  | G | A | rs141340287           | 6.20E-05 | 0.049 | 0.082 | 0.57 | 0.44 | -0.75 | 8.05E-01 | 0.064 | 0.060 | 1.07 | 0.84 | -1.36 | 0.78 | 6.81E-03 | ZNF830(dist=3864), LIG3(dist=13448)                  | intergenic     |
| 12 | 84881410  | T | A | rs11116421            | 4.75E-05 | 0.150 | 0.198 | 0.71 | 0.6  | -0.85 | 9.72E-01 | 0.182 | 0.185 | 0.98 | 0.84 | -1.14 | 0.86 | 6.81E-03 | TMTC2(dist=1353343), SLC6A15(dist=371857)            | intergenic     |
| 13 | 109658721 | A | G | rs149322523           | 4.58E-05 | 0.064 | 0.042 | 1.54 | 1.18 | -2.03 | 6.71E-01 | 0.038 | 0.039 | 0.98 | 0.72 | -1.32 | 1.39 | 6.82E-03 | MYO16                                                | intronic       |
| 16 | 69117345  | C | T | rs115966379           | 1.20E-05 | 0.018 | 0.045 | 0.39 | 0.26 | -0.6  | 5.18E-01 | 0.031 | 0.027 | 1.16 | 0.82 | -1.63 | 0.69 | 6.82E-03 | TANGO6                                               | intronic       |
| 10 | 124511471 | C | G | rs10751756            | 4.64E-05 | 0.434 | 0.479 | 0.83 | 0.74 | -0.94 | 7.90E-01 | 0.499 | 0.481 | 0.93 | 0.83 | -1.05 | 0.88 | 6.84E-03 | C10orf120(dist=52133), DMBT1P1(dist=4739)            | intergenic     |
| 4  | 99778952  | G | A | rs112341326           | 5.89E-05 | 0.184 | 0.145 | 1.33 | 1.13 | -1.57 | 8.35E-01 | 0.152 | 0.142 | 1.08 | 0.92 | -1.28 | 1.19 | 6.84E-03 | TSPAN5(dist=199140), EIF4E(dist=20655)               | intergenic     |
| 1  | 198125006 | C | T | rs60001478            | 1.79E-05 | 0.046 | 0.026 | 1.84 | 1.32 | -2.55 | 7.23E-01 | 0.030 | 0.030 | 1.01 | 0.72 | -1.43 | 1.43 | 6.86E-03 | LHX9(dist=225733), NEK7(dist=1102)                   | intergenic     |
| 13 | 109664103 | C | T | rs142111694           | 4.16E-05 | 0.054 | 0.034 | 1.64 | 1.22 | -2.21 | 6.58E-01 | 0.033 | 0.033 | 0.98 | 0.7  | -1.36 | 1.42 | 6.86E-03 | MYO16                                                | intronic       |
| 1  | 30277668  | G | A | rs4949477             | 9.32E-06 | 0.333 | 0.392 | 0.78 | 0.68 | -0.88 | 4.35E-01 | 0.390 | 0.387 | 1.01 | 0.9  | -1.14 | 0.87 | 6.94E-03 | LOC101928460(dist=601042), LOC101929406(dist=209131) | intergenic     |
| 7  | 157986458 | T | C | rs1806612,rs386720284 | 9.22E-01 | 0.315 | 0.301 | 0.94 | 0.82 | -1.07 | 5.19E-05 | 0.301 | 0.359 | 1.30 | 1.15 | -1.48 | 1.15 | 6.98E-03 | PTPRN2                                               | intronic       |
| 8  | 89295499  | C | T | rs7833392             | 4.05E-01 | 0.131 | 0.129 | 1.01 | 0.84 | -1.21 | 6.11E-06 | 0.083 | 0.119 | 0.67 | 0.55 | -0.83 | 0.82 | 6.98E-03 | MMP16                                                | intronic       |
| 9  | 36049379  | G | A | rs7860959             | 6.46E-05 | 0.104 | 0.074 | 1.46 | 1.18 | -1.81 | 9.94E-01 | 0.083 | 0.078 | 1.07 | 0.86 | -1.32 | 1.25 | 6.98E-03 | RECK                                                 | intronic       |
| 2  | 195973276 | A | C | rs2569912             | 6.31E-05 | 0.246 | 0.206 | 1.26 | 1.09 | -1.46 | 7.18E-01 | 0.194 | 0.187 | 1.05 | 0.9  | -1.21 | 1.18 | 6.98E-03 | LOC101927431(dist=347117), SLC39A10(dist=548256)     | intergenic     |
| 9  | 36048382  | T | G | rs77020402            | 6.45E-05 | 0.104 | 0.074 | 1.46 | 1.18 | -1.81 | 9.95E-01 | 0.083 | 0.078 | 1.07 | 0.86 | -1.32 | 1.25 | 6.99E-03 | RECK                                                 | intronic       |
| 9  | 36048310  | C | A | rs74830818            | 6.46E-05 | 0.104 | 0.074 | 1.46 | 1.18 | -1.81 | 9.95E-01 | 0.083 | 0.078 | 1.07 | 0.86 | -1.32 | 1.25 | 6.99E-03 | RECK                                                 | intronic       |
| 19 | 51368504  | C | T | rs4141856             | 6.66E-01 | 0.329 | 0.331 | 1.01 | 0.89 | -1.15 | 5.72E-05 | 0.388 | 0.336 | 0.80 | 0.71 | -0.9  | 0.88 | 6.99E-03 | KLK3(dist=4484), KLK2(dist=8185)                     | intergenic     |
| 4  | 35967940  | T | C | rs1616925             | 5.63E-06 | 0.169 | 0.119 | 0.66 | 0.55 | -0.79 | 6.41E-01 | 0.145 | 0.160 | 1.12 | 0.95 | -1.32 | 0.84 | 7.10E-03 | LOC101928622(dist=1926425), ARAP2(dist=99680)        | intergenic     |
| 16 | 84858634  | C | T | rs138324317           | 9.23E-01 | 0.055 | 0.059 | 0.93 | 0.71 | -1.22 | 2.87E-05 | 0.065 | 0.042 | 1.57 | 1.23 | -2.01 | 1.40 | 7.11E-03 | CRISPLD2                                             | intronic       |
| 10 | 58730891  | C | T | rs4338456             | 3.43E-05 | 0.436 | 0.353 | 1.42 | 1.25 | -1.61 | 8.36E-01 | 0.404 | 0.411 | 0.97 | 0.86 | -1.09 | 1.14 | 7.14E-03 | ZWINT(dist=609857), MIR3924(dist=333348)             | intergenic     |
| 15 | 33014770  | T | A | rs78926726            | 1.20E-05 | 0.064 | 0.042 | 1.57 | 1.2  | -2.07 | 7.54E-01 | 0.055 | 0.054 | 1.02 | 0.79 | -1.32 | 1.34 | 7.14E-03 | GREM1                                                | intronic       |
| 10 | 58712223  | A | G | rs10740694            | 2.76E-05 | 0.443 | 0.359 | 1.42 | 1.25 | -1.61 | 8.70E-01 | 0.411 | 0.419 | 0.97 | 0.86 | -1.09 | 1.14 | 7.20E-03 | ZWINT(dist=591189), MIR3924(dist=352016)             | intergenic     |
| 5  | 65446273  | G | T | rs12523007            | 4.98E-01 | 0.086 | 0.078 | 1.11 | 0.89 | -1.39 | 1.31E-05 | 0.060 | 0.097 | 0.59 | 0.47 | -0.75 | 0.80 | 7.23E-03 | SREK1                                                | intronic       |
| 13 | 46728597  | G | A | rs56797349            | 8.95E-01 | 0.036 | 0.037 | 0.96 | 0.69 | -1.34 | 5.91E-05 | 0.039 | 0.022 | 1.77 | 1.28 | -2.45 | 1.57 | 7.23E-03 | LCP1                                                 | intronic       |
| 4  | 35966940  | T | A | rs1714090             | 5.86E-06 | 0.169 | 0.119 | 0.66 | 0.56 | -0.79 | 6.42E-01 | 0.145 | 0.160 | 1.12 | 0.95 | -1.32 | 0.84 | 7.23E-03 | LOC101928622(dist=1925425), ARAP2(dist=100680)       | intergenic     |
| 14 | 105081712 | T | A | rs7147154             | 2.48E-01 | 0.154 | 0.168 | 1.11 | 0.93 | -1.31 | 1.89E-06 | 0.211 | 0.156 | 0.69 | 0.6  | -0.8  | 0.85 | 7.29E-03 | TMEM179(dist=10615), MIR4710(dist=62319)             | intergenic     |
| 9  | 36048592  | G | T | rs111264281           | 6.22E-05 | 0.104 | 0.074 | 1.44 | 1.17 | -1.79 | 9.95E-01 | 0.083 | 0.078 | 1.07 | 0.86 | -1.32 | 1.25 | 7.30E-03 | RECK                                                 | intronic       |
| 5  | 54317111  | G | A | rs4865910             | 8.42E-01 | 0.407 | 0.393 | 0.94 | 0.83 | -1.07 | 5.86E-05 | 0.371 | 0.435 | 1.31 | 1.16 | -1.47 | 1.15 | 7.32E-03 | LOC102467081                                         | downstream     |
| 10 | 15423620  | T | C | rs17360549            | 6.11E-01 | 0.079 | 0.077 | 1.03 | 0.82 | -1.29 | 5.18E-05 | 0.105 | 0.077 | 1.40 | 1.15 | -1.7  | 1.26 | 7.34E-03 | FAM171A1(dist=10562), ITGA8(dist=132328)             | intergenic     |
| 10 | 58733817  | T | C | rs11817040            | 2.18E-05 | 0.439 | 0.354 | 1.43 | 1.26 | -1.62 | 9.17E-01 | 0.405 | 0.413 | 0.97 | 0.86 | -1.09 | 1.14 | 7.38E-03 | ZWINT(dist=612783), MIR3924(dist=330422)             | intergenic     |
| 8  | 18414418  | G | C | rs80104635            | 5.62E-01 | 0.046 | 0.052 | 0.88 | 0.66 | -1.18 | 1.45E-05 | 0.073 | 0.044 | 1.73 | 1.36 | -2.19 | 1.33 | 7.42E-03 | PSD3                                                 | intronic       |
| 8  | 18414499  | T | C | rs116583224           | 5.62E-01 | 0.046 | 0.052 | 0.88 | 0.66 | -1.18 | 1.46E-05 | 0.073 | 0.044 | 1.73 | 1.36 | -2.19 | 1.33 | 7.44E-03 | PSD3                                                 | intronic       |
| 8  | 10005640  | G | A | rs73530948            | 3.01E-05 | 0.054 | 0     |      |      |       |          |       |       |      |      |       |      |          |                                                      |                |

|    |           |   |   |                        |          |       |       |      |      |       |          |       |       |      |      |       |      |          |                                                |                |
|----|-----------|---|---|------------------------|----------|-------|-------|------|------|-------|----------|-------|-------|------|------|-------|------|----------|------------------------------------------------|----------------|
| 4  | 35962693  | G | T | rs1714099              | 6.45E-06 | 0.170 | 0.119 | 0.66 | 0.56 | -0.79 | 6.38E-01 | 0.145 | 0.160 | 1.12 | 0.95 | -1.32 | 0.84 | 7.71E-03 | LOC101928622(dist=1921178), ARAP2(dist=104927) | intergenic     |
| 18 | 72266492  | G | A | rs8099545              | 2.53E-05 | 0.139 | 0.190 | 1.45 | 1.22 | -1.72 | 6.11E-01 | 0.167 | 0.162 | 0.97 | 0.83 | -1.13 | 1.18 | 7.72E-03 | LINC00909(dist=1421), ZNF407(dist=76427)       | intergenic     |
| 14 | 56423445  | T | A | rs1188152              | 4.12E-01 | 0.400 | 0.407 | 1.03 | 0.91 | -1.17 | 7.32E-06 | 0.470 | 0.412 | 0.79 | 0.7  | -0.89 | 0.88 | 7.73E-03 | LINC00520(dist=160053), PELI2(dist=161648)     | intergenic     |
| 8  | 127601027 | G | A | rs17814990             | 6.06E-01 | 0.101 | 0.089 | 1.15 | 0.93 | -1.42 | 5.32E-06 | 0.172 | 0.151 | 1.17 | 1    | -1.36 | 1.26 | 7.73E-03 | FAM84B(dist=30316), PCAT1(dist=424372)         | intergenic     |
| 14 | 105081957 | G | C | rs6576054              | 2.68E-01 | 0.128 | 0.138 | 1.10 | 0.91 | -1.32 | 2.47E-06 | 0.174 | 0.126 | 0.68 | 0.58 | -0.8  | 0.84 | 7.76E-03 | TMEM179(dist=10860), MIR4710(dist=62074)       | intergenic     |
| 5  | 117793404 | C | T | rs72793511             | 6.34E-01 | 0.169 | 0.180 | 0.92 | 0.78 | -1.09 | 8.18E-06 | 0.213 | 0.161 | 1.41 | 1.22 | -1.63 | 1.18 | 7.81E-03 | LOC101927280                                   | ncRNA_intronic |
| 10 | 113943383 | T | C | rs74156594             | 6.28E-05 | 0.077 | 0.052 | 1.53 | 1.19 | -1.96 | 8.30E-01 | 0.055 | 0.051 | 1.08 | 0.84 | -1.4  | 1.33 | 7.82E-03 | GPAM                                           | intronic       |
| 5  | 37972576  | G | A | rs2136192              | 8.82E-01 | 0.410 | 0.406 | 1.02 | 0.9  | -1.16 | 6.13E-05 | 0.359 | 0.412 | 0.80 | 0.71 | -0.9  | 0.88 | 7.86E-03 | GDNF-AS1(dist=96676), EGFLAM(dist=285935)      | intergenic     |
| 8  | 89270241  | G | A | rs28904588             | 3.65E-01 | 0.125 | 0.123 | 1.02 | 0.85 | -1.23 | 6.73E-06 | 0.084 | 0.119 | 0.68 | 0.55 | -0.83 | 0.82 | 7.87E-03 | MMP16                                          | intronic       |
| 18 | 48885245  | T | C | rs76613846             | 6.16E-05 | 0.022 | 0.045 | 0.48 | 0.33 | -0.71 | 8.18E-01 | 0.039 | 0.037 | 1.05 | 0.77 | -1.42 | 0.70 | 7.93E-03 | MEX3C(dist=161194), LOC100287225(dist=33167)   | intergenic     |
| 1  | 31155108  | C | T | rs11590948             | 2.66E-01 | 0.068 | 0.069 | 0.99 | 0.78 | -1.27 | 4.48E-06 | 0.125 | 0.099 | 1.30 | 1.08 | -1.56 | 1.27 | 8.01E-03 | LOC101929406(dist=644649), MATN1(dist=29016)   | intergenic     |
| 1  | 198145413 | A | C | rs74388251             | 2.21E-05 | 0.046 | 0.026 | 1.82 | 1.31 | -2.53 | 6.66E-01 | 0.031 | 0.031 | 1.00 | 0.71 | -1.4  | 1.43 | 8.02E-03 | NEK7                                           | intronic       |
| 4  | 35965767  | C | T | rs7680842              | 5.91E-06 | 0.169 | 0.119 | 0.66 | 0.56 | -0.79 | 5.81E-01 | 0.147 | 0.163 | 1.13 | 0.96 | -1.33 | 0.84 | 8.04E-03 | LOC101928622(dist=1924252), ARAP2(dist=101853) | intergenic     |
| 6  | 22500302  | C | T | rs113865402            | 7.12E-01 | 0.040 | 0.042 | 0.94 | 0.69 | -1.29 | 1.76E-05 | 0.060 | 0.036 | 1.69 | 1.3  | -2.19 | 1.38 | 8.06E-03 | PRL(dist=197220), HDGFL1(dist=69376)           | intergenic     |
| 13 | 43098060  | A | G | rs35906483             | 3.52E-05 | 0.188 | 0.240 | 0.73 | 0.63 | -0.86 | 6.43E-01 | 0.218 | 0.217 | 1.01 | 0.87 | -1.16 | 0.85 | 8.06E-03 | AKAP11(dist=200657), TNFSF11(dist=38812)       | intergenic     |
| 10 | 51518688  | A | C | rs2843546              | 7.28E-06 | 0.259 | 0.189 | 1.51 | 1.3  | -1.74 | 9.18E-01 | 0.221 | 0.232 | 0.94 | 0.82 | -1.08 | 1.17 | 8.08E-03 | TIMM23B                                        | intronic       |
| 10 | 51519516  | G | A | rs2611486              | 7.52E-06 | 0.259 | 0.188 | 1.51 | 1.3  | -1.74 | 9.22E-01 | 0.221 | 0.231 | 0.94 | 0.82 | -1.08 | 1.17 | 8.10E-03 | TIMM23B                                        | intronic       |
| 14 | 105084021 | A | T | rs10138987             | 2.83E-01 | 0.127 | 0.137 | 1.09 | 0.91 | -1.31 | 3.52E-06 | 0.173 | 0.125 | 0.68 | 0.58 | -0.8  | 0.84 | 8.11E-03 | TMEM179(dist=12924), MIR4710(dist=60010)       | intergenic     |
| 7  | 113541103 | C | T | rs3857834              | 6.40E-01 | 0.455 | 0.468 | 1.05 | 0.93 | -1.19 | 2.27E-05 | 0.494 | 0.431 | 0.78 | 0.69 | -0.87 | 0.88 | 8.11E-03 | PPP1R3A                                        | intronic       |
| 12 | 84899742  | C | T | rs1459609              | 4.12E-05 | 0.152 | 0.200 | 0.72 | 0.61 | -0.85 | 8.88E-01 | 0.185 | 0.187 | 0.98 | 0.85 | -1.14 | 0.86 | 8.12E-03 | TMTC2(dist=1371675), SLC6A15(dist=353525)      | intergenic     |
| 1  | 236911456 | T | C | rs41269357             | 8.16E-01 | 0.033 | 0.031 | 1.08 | 0.76 | -1.54 | 3.57E-05 | 0.042 | 0.029 | 1.47 | 1.08 | -1.99 | 1.56 | 8.18E-03 | ACTN2                                          | intronic       |
| 10 | 58720080  | G | C | rs10825941             | 3.29E-05 | 0.437 | 0.353 | 1.42 | 1.25 | -1.61 | 8.92E-01 | 0.405 | 0.413 | 0.97 | 0.86 | -1.09 | 1.14 | 8.18E-03 | ZWINT(dist=599046), MIR3924(dist=344159)       | intergenic     |
| 10 | 58722115  | C | T | rs2393188              | 3.29E-05 | 0.437 | 0.353 | 1.42 | 1.25 | -1.61 | 8.92E-01 | 0.405 | 0.413 | 0.97 | 0.86 | -1.09 | 1.14 | 8.18E-03 | ZWINT(dist=601081), MIR3924(dist=342124)       | intergenic     |
| 10 | 58721898  | C | T | rs2393187              | 3.29E-05 | 0.437 | 0.353 | 1.42 | 1.25 | -1.61 | 8.92E-01 | 0.405 | 0.413 | 0.97 | 0.86 | -1.09 | 1.14 | 8.18E-03 | ZWINT(dist=600864), MIR3924(dist=342341)       | intergenic     |
| 10 | 58724480  | A | C | rs4341459              | 3.30E-05 | 0.437 | 0.353 | 1.42 | 1.25 | -1.61 | 8.92E-01 | 0.405 | 0.413 | 0.97 | 0.86 | -1.09 | 1.14 | 8.19E-03 | ZWINT(dist=603446), MIR3924(dist=339759)       | intergenic     |
| 10 | 58716228  | G | A | rs11005588             | 3.38E-05 | 0.435 | 0.351 | 1.42 | 1.25 | -1.61 | 8.85E-01 | 0.403 | 0.411 | 0.97 | 0.86 | -1.09 | 1.14 | 8.19E-03 | ZWINT(dist=595194), MIR3924(dist=348011)       | intergenic     |
| 10 | 58725419  | A | G | rs2393193              | 3.30E-05 | 0.437 | 0.353 | 1.42 | 1.25 | -1.61 | 8.92E-01 | 0.405 | 0.413 | 0.97 | 0.86 | -1.09 | 1.14 | 8.19E-03 | ZWINT(dist=604385), MIR3924(dist=338820)       | intergenic     |
| 1  | 204729758 | G | A | rs2093537;rs58903979   | 8.17E-01 | 0.154 | 0.165 | 0.92 | 0.78 | -1.09 | 5.96E-05 | 0.191 | 0.140 | 1.44 | 1.24 | -1.68 | 1.18 | 8.20E-03 | LRRN2(dist=75161), NFASC(dist=68024)           | intergenic     |
| 10 | 58725588  | T | A | rs2393194              | 3.30E-05 | 0.437 | 0.353 | 1.42 | 1.25 | -1.61 | 8.93E-01 | 0.405 | 0.413 | 0.97 | 0.86 | -1.09 | 1.14 | 8.21E-03 | ZWINT(dist=604554), MIR3924(dist=338651)       | intergenic     |
| 19 | 30922026  | G | C | rs8111768              | 4.92E-05 | 0.356 | 0.312 | 1.22 | 1.07 | -1.38 | 7.75E-01 | 0.305 | 0.296 | 1.04 | 0.92 | -1.18 | 1.15 | 8.24E-03 | ZNF536                                         | intronic       |
| 10 | 58730335  | T | C | rs7902645              | 3.35E-05 | 0.437 | 0.353 | 1.42 | 1.25 | -1.61 | 8.93E-01 | 0.405 | 0.413 | 0.97 | 0.86 | -1.09 | 1.14 | 8.25E-03 | ZWINT(dist=609301), MIR3924(dist=333904)       | intergenic     |
| 10 | 58730105  | T | C | rs10825946             | 3.35E-05 | 0.437 | 0.353 | 1.42 | 1.25 | -1.61 | 8.93E-01 | 0.405 | 0.413 | 0.97 | 0.86 | -1.09 | 1.14 | 8.25E-03 | ZWINT(dist=609071), MIR3924(dist=334134)       | intergenic     |
| 1  | 116247535 | G | C | rs3811005              | 7.09E-01 | 0.445 | 0.443 | 0.99 | 0.87 | -1.12 | 4.54E-05 | 0.484 | 0.436 | 0.82 | 0.73 | -0.93 | 0.89 | 8.26E-03 | CASQ2                                          | intronic       |
| 1  | 72799779  | C | T | rs34601468             | 6.40E-01 | 0.204 | 0.200 | 1.02 | 0.88 | -1.19 | 1.89E-05 | 0.244 | 0.210 | 1.21 | 1.06 | -1.39 | 1.19 | 8.27E-03 | NEGR1(dist=51502), LINC01360(dist=972074)      | intergenic     |
| 13 | 43085599  | T | C | rs346601               | 1.82E-05 | 0.208 | 0.260 | 0.75 | 0.64 | -0.87 | 6.33E-01 | 0.235 | 0.235 | 1.00 | 0.87 | -1.15 | 0.86 | 8.30E-03 | AKAP11(dist=188196), TNFSF11(dist=51273)       | intergenic     |
| 3  | 168391645 | G | A | rs988230               | 6.95E-01 | 0.119 | 0.113 | 0.94 | 0.77 | -1.14 | 4.71E-05 | 0.163 | 0.132 | 0.78 | 0.67 | -0.92 | 0.83 | 8.34E-03 | EGFEM1P                                        | ncRNA_intronic |
| 4  | 35971030  | T | C | rs56400266             | 3.03E-05 | 0.448 | 0.387 | 1.08 | 0.78 | -0.88 | 7.43E-01 | 0.404 | 0.413 | 1.04 | 0.92 | -1.17 | 0.89 | 8.34E-03 | LOC101928622(dist=1929515), ARAP2(dist=96590)  | intergenic     |
| 7  | 113560607 | T | A | rs7795394              | 6.80E-01 | 0.446 | 0.458 | 1.05 | 0.93 | -1.19 | 2.61E-05 | 0.500 | 0.439 | 0.78 | 0.7  | -0.88 | 0.88 | 8.42E-03 | PPP1R3A(dist=1525), NONE(dist=NONE)            | intergenic     |
| 10 | 58732583  | G | A | rs7099636              | 3.48E-05 | 0.437 | 0.353 | 1.42 | 1.25 | -1.61 | 8.94E-01 | 0.405 | 0.413 | 0.97 | 0.86 | -1.09 | 1.14 | 8.43E-03 | ZWINT(dist=611549), MIR3924(dist=331656)       | intergenic     |
| 10 | 58732758  | T | C | rs2393198              | 3.48E-05 | 0.437 | 0.353 | 1.42 | 1.25 | -1.61 | 8.94E-01 | 0.405 | 0.413 | 0.97 | 0.86 | -1.09 | 1.14 | 8.43E-03 | ZWINT(dist=611724), MIR3924(dist=331481)       | intergenic     |
| 10 | 58720012  | T | C | rs10825940             | 3.55E-05 | 0.436 | 0.353 | 1.42 | 1.25 | -1.61 | 8.92E-01 | 0.404 | 0.412 | 0.97 | 0.86 | -1.09 | 1.14 | 8.51E-03 | ZWINT(dist=598978), MIR3924(dist=344227)       | intergenic     |
| 2  | 129145704 | G | A | rs17016238             | 6.60E-01 | 0.078 | 0.072 | 1.10 | 0.87 | -1.39 | 3.92E-05 | 0.109 | 0.090 | 1.23 | 1.02 | -1.49 | 1.28 | 8.53E-03 | HS6ST1(dist=69533), LOC101927881(dist=476470)  | intergenic     |
| 1  | 26493240  | T | C | rs10794524             | 7.77E-01 | 0.408 | 0.401 | 1.03 | 0.91 | -1.17 | 5.23E-05 | 0.484 | 0.437 | 1.21 | 1.08 | -1.36 | 1.13 | 8.54E-03 | FAM110D(dist=4121), ZNF593(dist=3148)          | intergenic     |
| 12 | 117532098 | A | G | rs6490108              | 3.20E-05 | 0.434 | 0.507 | 0.75 | 0.66 | -0.85 | 8.72E-01 | 0.470 | 0.453 | 1.07 | 0.95 | -1.2  | 0.89 | 8.55E-03 | TESC                                           | intronic       |
| 4  | 40908232  | G | C | rs76171353             | 8.22E-01 | 0.070 | 0.076 | 0.93 | 0.73 | -1.18 | 3.98E-05 | 0.083 | 0.054 | 1.59 | 1.27 | -1.98 | 1.27 | 8.57E-03 | APBB2                                          | intronic       |
| 9  | 8848537   | G | C | rs147013358            | 3.38E-05 | 0.082 | 0.055 | 1.55 | 1.22 | -1.97 | 7.50E-01 | 0.058 | 0.057 | 1.02 | 0.79 | -1.31 | 1.29 | 8.62E-03 | PTPRD                                          | intronic       |
| 16 | 59001592  | A | G | rs11864534             | 7.33E-01 | 0.067 | 0.073 | 0.91 | 0.71 | -1.16 | 7.99E-06 | 0.091 | 0.062 | 1.52 | 1.23 | -1.88 | 1.30 | 8.66E-03 | GOT2(dist=233331), APOOP5(dist=786453)         | intergenic     |
| 10 | 58715993  | C | G | rs12220886             | 3.28E-05 | 0.437 | 0.353 | 1.42 | 1.25 | -1.61 | 9.12E-01 | 0.404 | 0.413 | 0.97 | 0.86 | -1.09 | 1.14 | 8.67E-03 | ZWINT(dist=594959), MIR3924(dist=348246)       | intergenic     |
| 10 | 58716020  | A | T | rs10825937;rs386744166 | 3.28E-05 | 0.437 | 0.353 | 1.42 | 1.25 | -1.61 | 9.12E-01 | 0.404 | 0.413 | 0.97 | 0.86 | -1.09 | 1.14 | 8.67E-03 | ZWINT(dist=594986), MIR3924(dist=348219)       | intergenic     |
| 10 | 51506957  | C | T | rs2125771              | 1.26E-05 | 0.255 | 0.188 | 1.48 | 1.27 | -1.71 | 9.55E-01 | 0.231 | 0.240 | 0.95 | 0.83 | -1.09 | 1.17 | 8.67E-03 | TIMM23B                                        | intronic       |
| 10 | 58717358  | G | A | rs4579860              | 3.28E-05 | 0.437 | 0.353 | 1.42 | 1.25 | -1.61 | 9.12E-01 | 0.404 | 0.413 | 0.97 | 0.86 | -1.09 | 1.14 | 8.67E-03 | ZWINT(dist=596324), MIR3924(dist=346881)       | intergenic     |
| 8  | 18429663  | C | T | rs2717756              | 3.88E-01 | 0.172 | 0.184 | 1.08 | 0.92 | -1.28 | 8.35E-06 | 0.216 | 0.167 | 0.73 | 0.63 | -0.85 | 0.84 | 8.79E-03 | PSD3                                           | intronic       |
| 10 | 51500301  | A | G | rs2611502              | 7.05E-06 | 0.252 | 0.185 | 1.49 | 1.28 | -1.72 | 8.55E-01 | 0.226 | 0.236 | 0.94 | 0.82 | -1.08 | 1.17 | 8.82E-03 | TIMM23B                                        | intronic       |
| 8  | 89298829  | G | A | rs57136992             | 3.06E-01 | 0.129 | 0.126 | 1.03 | 0.86 | -1.24 | 4.35E-06 | 0.083 | 0.120 | 0.67 | 0.54 | -0.82 | 0.83 | 8.83E-03 | MMP16                                          | intronic       |
| 8  | 98896088  | T | G | rs57438375             | 1.00E-05 | 0.247 | 0.206 | 1.27 | 1.09 | -1.47 | 5.93E-01 | 0.202 | 0.196 | 1.03 | 0.89 | -1.2  | 1.17 | 8.83E-03 | MATN2                                          | intronic       |
| 7  | 113505111 | A | T | rs61075694             | 6.62E-01 | 0.307 | 0.314 | 0.97 | 0.85 | -1.11 | 3.17E-05 | 0.357 | 0.303 | 1.28 | 1.13 | -1.45 | 1.14 | 8.86E-03 | LINC00998(dist=746474), PPP1R3A(dist=11771)    | intergenic     |
| 8  | 18413     |   |   |                        |          |       |       |      |      |       |          |       |       |      |      |       |      |          |                                                |                |

|    |           |   |   |                         |          |       |       |      |      |       |          |       |       |      |      |       |      |          |                                                  |                |
|----|-----------|---|---|-------------------------|----------|-------|-------|------|------|-------|----------|-------|-------|------|------|-------|------|----------|--------------------------------------------------|----------------|
| 9  | 8840025   | C | T | rs114225637;rs386732387 | 3.54E-05 | 0.078 | 0.051 | 1.58 | 1.23 | -2.03 | 7.28E-01 | 0.050 | 0.050 | 1.01 | 0.77 | -1.32 | 1.30 | 8.99E-03 | PTPRD                                            | intronic       |
| 17 | 74279445  | T | C | rs4789267               | 8.67E-01 | 0.214 | 0.203 | 0.94 | 0.8  | -1.09 | 2.33E-05 | 0.251 | 0.221 | 0.85 | 0.74 | -0.97 | 0.85 | 8.99E-03 | QRICH2                                           | intronic       |
| 19 | 30033739  | T | C | rs79364176              | 1.46E-06 | 0.084 | 0.055 | 1.57 | 1.24 | -2    | 3.49E-01 | 0.064 | 0.067 | 0.95 | 0.75 | -1.21 | 1.32 | 9.00E-03 | VSTM2B                                           | intronic       |
| 4  | 92460125  | T | C | rs28368732              | 5.93E-01 | 0.106 | 0.112 | 0.94 | 0.77 | -1.15 | 3.71E-05 | 0.143 | 0.100 | 1.50 | 1.26 | -1.78 | 1.21 | 9.01E-03 | CCSER1                                           | intronic       |
| 10 | 58714828  | A | G | rs6481242               | 2.81E-05 | 0.435 | 0.351 | 1.42 | 1.25 | -1.62 | 9.52E-01 | 0.403 | 0.412 | 0.96 | 0.85 | -1.08 | 1.14 | 9.03E-03 | ZWINT(dist=593794), MIR3924(dist=349411)         | intergenic     |
| 2  | 102960281 | C | G | rs3821204               | 5.95E-01 | 0.099 | 0.086 | 1.17 | 0.95 | -1.45 | 3.47E-05 | 0.075 | 0.120 | 0.60 | 0.48 | -0.74 | 0.82 | 9.06E-03 | IL1RL1                                           | UTR3           |
| 3  | 57059326  | T | C | rs77863260              | 2.39E-05 | 0.088 | 0.060 | 1.50 | 1.19 | -1.89 | 5.63E-01 | 0.064 | 0.065 | 1.00 | 0.79 | -1.27 | 1.27 | 9.07E-03 | ARHGFE3                                          | intronic       |
| 8  | 89282661  | A | C | rs16880535              | 3.41E-01 | 0.127 | 0.124 | 1.02 | 0.85 | -1.23 | 6.35E-06 | 0.082 | 0.118 | 0.67 | 0.55 | -0.83 | 0.83 | 9.08E-03 | MMP16                                            | intronic       |
| 2  | 102960007 | G | A | rs12905                 | 5.94E-01 | 0.099 | 0.086 | 1.17 | 0.95 | -1.45 | 3.49E-05 | 0.075 | 0.119 | 0.60 | 0.48 | -0.74 | 0.82 | 9.09E-03 | IL1RL1                                           | UTR3           |
| 9  | 36033857  | C | T | rs76989190              | 4.42E-05 | 0.102 | 0.072 | 1.45 | 1.17 | -1.8  | 8.85E-01 | 0.080 | 0.077 | 1.05 | 0.84 | -1.3  | 1.26 | 9.12E-03 | OR2S2(dist=75706), RECK(dist=3053)               | intergenic     |
| 10 | 58727512  | C | T | rs10825943              | 3.13E-05 | 0.438 | 0.350 | 1.42 | 1.25 | -1.61 | 9.39E-01 | 0.405 | 0.414 | 0.96 | 0.86 | -1.09 | 1.14 | 9.13E-03 | ZWINT(dist=606478), MIR3924(dist=336727)         | intergenic     |
| 18 | 4848074   | C | G | rs113055418             | 9.58E-01 | 0.105 | 0.114 | 0.95 | 0.78 | -1.16 | 4.54E-05 | 0.127 | 0.093 | 1.42 | 1.19 | -1.7  | 1.23 | 9.14E-03 | DLGAP1(dist=392808), C18orf42(dist=295598)       | intergenic     |
| 6  | 132989825 | C | G | rs145605731             | 5.45E-01 | 0.116 | 0.118 | 0.98 | 0.81 | -1.19 | 6.42E-05 | 0.079 | 0.106 | 0.72 | 0.58 | -0.89 | 0.80 | 9.14E-03 | TAAR1(dist=22683), VNN1(dist=12172)              | intergenic     |
| 7  | 14242785  | C | T | rs113588777             | 9.59E-01 | 0.155 | 0.161 | 0.95 | 0.8  | -1.13 | 2.15E-05 | 0.167 | 0.129 | 1.36 | 1.16 | -1.59 | 1.21 | 9.20E-03 | DGKB                                             | intronic       |
| 10 | 58729004  | G | A | rs2393195               | 3.69E-05 | 0.431 | 0.349 | 1.41 | 1.24 | -1.6  | 9.13E-01 | 0.401 | 0.409 | 0.97 | 0.86 | -1.09 | 1.14 | 9.21E-03 | ZWINT(dist=607970), MIR3924(dist=335235)         | intergenic     |
| 14 | 95946152  | A | G | rs74083415              | 2.98E-05 | 0.284 | 0.243 | 1.24 | 1.08 | -1.43 | 7.46E-01 | 0.238 | 0.230 | 1.05 | 0.91 | -1.2  | 1.15 | 9.21E-03 | SYNE3(dist=3979), SNHG10(dist=53097)             | intergenic     |
| 9  | 8842144   | C | A | rs75327370              | 3.80E-05 | 0.078 | 0.051 | 1.58 | 1.23 | -2.02 | 7.33E-01 | 0.051 | 0.050 | 1.01 | 0.77 | -1.32 | 1.30 | 9.23E-03 | PTPRD                                            | intronic       |
| 6  | 132987681 | C | T | rs184007221             | 5.42E-01 | 0.116 | 0.118 | 0.98 | 0.81 | -1.19 | 6.42E-05 | 0.079 | 0.106 | 0.72 | 0.58 | -0.89 | 0.80 | 9.23E-03 | TAAR1(dist=20539), VNN1(dist=14316)              | intergenic     |
| 1  | 198257324 | A | G | rs58740678              | 6.14E-06 | 0.047 | 0.025 | 1.91 | 1.37 | -2.65 | 4.50E-01 | 0.028 | 0.030 | 0.94 | 0.66 | -1.34 | 1.42 | 9.27E-03 | NEK7                                             | intronic       |
| 10 | 51502436  | A | T | rs56244335              | 1.20E-05 | 0.248 | 0.183 | 1.47 | 1.27 | -1.71 | 9.11E-01 | 0.222 | 0.231 | 0.95 | 0.82 | -1.09 | 1.17 | 9.30E-03 | TIMM23B                                          | intronic       |
| 9  | 8846763   | G | A | rs114215915             | 4.92E-05 | 0.079 | 0.052 | 1.56 | 1.22 | -1.99 | 7.97E-01 | 0.052 | 0.051 | 1.02 | 0.79 | -1.33 | 1.29 | 9.30E-03 | PTPRD                                            | intronic       |
| 4  | 68200518  | G | A | rs14400565              | 4.87E-01 | 0.252 | 0.261 | 0.96 | 0.83 | -1.1  | 1.58E-05 | 0.294 | 0.245 | 1.28 | 1.12 | -1.46 | 1.15 | 9.30E-03 | MIR1269A(dist=1057872), LOC101927237(dist=82505) | intergenic     |
| 10 | 52025987  | T | C | rs2813294               | 5.36E-05 | 0.475 | 0.401 | 1.35 | 1.19 | -1.53 | 8.66E-01 | 0.432 | 0.437 | 0.98 | 0.87 | -1.1  | 1.14 | 9.33E-03 | ASAH2(dist=17617), SGM51(dist=39358)             | intergenic     |
| 19 | 16097075  | G | A | rs10412052              | 1.95E-05 | 0.292 | 0.240 | 1.31 | 1.14 | -1.51 | 4.13E-01 | 0.214 | 0.214 | 1.00 | 0.87 | -1.16 | 1.16 | 9.34E-03 | OR10H4(dist=36307), LINC00661(dist=29369)        | intergenic     |
| 8  | 134589458 | G | A | rs59369176              | 3.72E-05 | 0.072 | 0.051 | 1.44 | 1.12 | -1.86 | 7.60E-01 | 0.049 | 0.048 | 1.01 | 0.77 | -1.33 | 1.39 | 9.34E-03 | ST3GAL1(dist=5275), LOC101927798(dist=198336)    | intergenic     |
| 8  | 89285456  | G | C | rs147849836             | 3.37E-01 | 0.127 | 0.124 | 1.02 | 0.85 | -1.23 | 6.46E-06 | 0.082 | 0.118 | 0.67 | 0.55 | -0.83 | 0.83 | 9.35E-03 | MMP16                                            | intronic       |
| 8  | 5959900   | A | G | rs74478569              | 4.99E-01 | 0.169 | 0.187 | 0.89 | 0.75 | -1.04 | 5.68E-06 | 0.213 | 0.161 | 1.41 | 1.22 | -1.63 | 1.18 | 9.42E-03 | CSMD1(dist=1107572), LOC100287015(dist=301177)   | intergenic     |
| 9  | 36033589  | A | G | rs74759588              | 4.61E-05 | 0.101 | 0.072 | 1.45 | 1.17 | -1.8  | 8.82E-01 | 0.080 | 0.077 | 1.05 | 0.84 | -1.3  | 1.25 | 9.43E-03 | OR2S2(dist=75438), RECK(dist=3321)               | intergenic     |
| 12 | 12256628  | T | C | rs10845484              | 3.33E-01 | 0.118 | 0.097 | 1.25 | 1.02 | -1.52 | 2.13E-05 | 0.103 | 0.152 | 0.64 | 0.53 | -0.77 | 0.81 | 9.48E-03 | BCL2L14(dist=4001), MIR1244-4(dist=8258)         | intergenic     |
| 2  | 204720139 | G | A | rs11571292              | 6.96E-01 | 0.375 | 0.368 | 1.03 | 0.91 | -1.17 | 4.61E-05 | 0.322 | 0.380 | 0.77 | 0.68 | -0.88 | 0.88 | 9.49E-03 | CD28(dist=116503), CTLA4(dist=12372)             | intergenic     |
| 10 | 58725097  | C | T | rs4641386               | 3.49E-05 | 0.437 | 0.353 | 1.42 | 1.25 | -1.61 | 9.41E-01 | 0.404 | 0.413 | 0.96 | 0.86 | -1.09 | 1.14 | 9.51E-03 | ZWINT(dist=604063), MIR3924(dist=339142)         | intergenic     |
| 10 | 58725026  | G | A | rs2893715               | 3.49E-05 | 0.437 | 0.353 | 1.42 | 1.25 | -1.61 | 9.41E-01 | 0.404 | 0.413 | 0.96 | 0.86 | -1.09 | 1.14 | 9.51E-03 | ZWINT(dist=603992), MIR3924(dist=339213)         | intergenic     |
| 10 | 58725039  | G | A | rs2393192               | 3.49E-05 | 0.437 | 0.353 | 1.42 | 1.25 | -1.61 | 9.41E-01 | 0.404 | 0.413 | 0.96 | 0.86 | -1.09 | 1.14 | 9.51E-03 | ZWINT(dist=604005), MIR3924(dist=339200)         | intergenic     |
| 9  | 36115269  | G | T | rs7045313               | 4.63E-05 | 0.109 | 0.078 | 1.44 | 1.17 | -1.78 | 8.95E-01 | 0.088 | 0.085 | 1.05 | 0.85 | -1.29 | 1.23 | 9.55E-03 | RECK                                             | intronic       |
| 1  | 116249741 | G | C | rs6428688               | 6.48E-01 | 0.445 | 0.444 | 0.99 | 0.88 | -1.13 | 4.18E-05 | 0.485 | 0.437 | 0.82 | 0.73 | -0.93 | 0.89 | 9.55E-03 | CASQ2                                            | intronic       |
| 2  | 102965332 | G | C | rs17027006              | 5.79E-01 | 0.099 | 0.086 | 1.17 | 0.95 | -1.45 | 3.68E-05 | 0.075 | 0.119 | 0.60 | 0.48 | -0.74 | 0.82 | 9.56E-03 | IL1RL1                                           | intronic       |
| 4  | 106684667 | C | T | rs2553452               | 4.26E-05 | 0.058 | 0.034 | 0.57 | 0.43 | -0.76 | 7.50E-01 | 0.041 | 0.045 | 1.11 | 0.83 | -1.49 | 0.75 | 9.63E-03 | GSTCD                                            | intronic       |
| 9  | 8844152   | T | C | rs115748227             | 4.28E-05 | 0.078 | 0.051 | 1.57 | 1.22 | -2.01 | 7.44E-01 | 0.051 | 0.050 | 1.01 | 0.78 | -1.32 | 1.29 | 9.65E-03 | PTPRD                                            | intronic       |
| 2  | 102955860 | G | T | rs3771177               | 6.13E-01 | 0.100 | 0.087 | 1.17 | 0.95 | -1.44 | 4.07E-05 | 0.076 | 0.120 | 0.60 | 0.49 | -0.75 | 0.82 | 9.66E-03 | IL1RL1                                           | intronic       |
| 10 | 32398589  | A | G | rs2114422               | 5.26E-05 | 0.274 | 0.343 | 1.38 | 1.2  | -1.58 | 9.93E-01 | 0.300 | 0.294 | 0.97 | 0.86 | -1.11 | 1.14 | 9.66E-03 | KIF5B(dist=53218), EPC1(dist=158055)             | intergenic     |
| 4  | 72702349  | T | C | rs10091955              | 3.43E-05 | 0.156 | 0.124 | 1.31 | 1.1  | -1.56 | 8.61E-01 | 0.124 | 0.121 | 1.03 | 0.86 | -1.23 | 1.21 | 9.68E-03 | EYA1(dist=427882), MSC(dist=51428)               | intergenic     |
| 4  | 35967720  | T | C | rs11939178              | 5.03E-05 | 0.448 | 0.389 | 0.78 | 0.69 | -0.89 | 7.53E-01 | 0.405 | 0.413 | 1.04 | 0.92 | -1.17 | 0.89 | 9.70E-03 | LOC101928622(dist=1926205), ARAP2(dist=99900)    | intergenic     |
| 11 | 7854876   | G | A | rs10769837              | 4.28E-01 | 0.412 | 0.385 | 1.12 | 0.99 | -1.27 | 6.83E-06 | 0.343 | 0.419 | 0.72 | 0.64 | -0.82 | 0.89 | 9.70E-03 | OR5P3(dist=7357), OR5E1P(dist=15722)             | intergenic     |
| 1  | 56952184  | C | T | rs7516563               | 1.06E-05 | 0.332 | 0.400 | 1.34 | 1.18 | -1.53 | 4.23E-01 | 0.383 | 0.371 | 0.95 | 0.84 | -1.07 | 1.14 | 9.72E-03 | MIR4422(dist=1260788), PPAP2B(dist=8235)         | intergenic     |
| 9  | 8836012   | T | A | rs75658452              | 3.60E-05 | 0.079 | 0.052 | 1.58 | 1.24 | -2.03 | 6.87E-01 | 0.051 | 0.051 | 1.01 | 0.77 | -1.31 | 1.29 | 9.75E-03 | PTPRD                                            | intronic       |
| 2  | 103305457 | C | T | rs78702801              | 7.53E-01 | 0.053 | 0.057 | 0.93 | 0.71 | -1.23 | 3.11E-05 | 0.068 | 0.046 | 1.52 | 1.19 | -1.94 | 1.44 | 9.76E-03 | SLC9A2                                           | intronic       |
| 4  | 106673328 | G | A | rs2112049               | 3.91E-05 | 0.057 | 0.033 | 0.57 | 0.42 | -0.76 | 8.30E-01 | 0.042 | 0.046 | 1.10 | 0.82 | -1.47 | 0.75 | 9.78E-03 | GSTCD                                            | intronic       |
| 8  | 89291085  | G | C | rs11986608              | 3.34E-01 | 0.127 | 0.124 | 1.03 | 0.85 | -1.24 | 6.83E-06 | 0.083 | 0.118 | 0.67 | 0.55 | -0.83 | 0.83 | 9.81E-03 | MMP16                                            | intronic       |
| 18 | 72344509  | G | A | rs7227263               | 1.46E-05 | 0.090 | 0.133 | 0.64 | 0.52 | -0.79 | 4.37E-01 | 0.118 | 0.113 | 1.05 | 0.88 | -1.26 | 0.83 | 9.83E-03 | ZNF407                                           | exonic         |
| 4  | 92477060  | A | G | rs10025394              | 6.26E-01 | 0.110 | 0.115 | 0.94 | 0.78 | -1.15 | 4.93E-05 | 0.148 | 0.104 | 1.49 | 1.26 | -1.77 | 1.20 | 9.84E-03 | CCSER1                                           | intronic       |
| 18 | 6556905   | T | C | rs78598273              | 7.32E-01 | 0.099 | 0.108 | 0.91 | 0.74 | -1.12 | 5.76E-05 | 0.132 | 0.095 | 1.45 | 1.21 | -1.73 | 1.24 | 9.89E-03 | LINC01387                                        | ncRNA_intronic |
| 8  | 89316955  | T | A | rs11994310              | 3.07E-01 | 0.130 | 0.127 | 1.03 | 0.85 | -1.24 | 4.77E-06 | 0.083 | 0.119 | 0.67 | 0.55 | -0.83 | 0.83 | 9.92E-03 | MMP16                                            | intronic       |
| 8  | 18417619  | C | T | rs12334635              | 5.45E-01 | 0.045 | 0.051 | 0.88 | 0.65 | -1.17 | 2.33E-05 | 0.072 | 0.043 | 1.71 | 1.35 | -2.18 | 1.32 | 9.96E-03 | PSD3                                             | intronic       |
| 3  | 30129304  | G | A | rs13322157              | 4.97E-01 | 0.023 | 0.028 | 0.82 | 0.55 | -1.22 | 5.28E-05 | 0.046 | 0.025 | 1.89 | 1.4  | -2.55 | 1.43 | 9.97E-03 | RBMS3(dist=77418), TGFBR2(dist=518690)           | intergenic     |
| 2  | 102971165 | C | T | rs56386507              | 5.42E-01 | 0.104 | 0.090 | 1.18 | 0.96 | -1.45 | 3.37E-05 | 0.079 | 0.125 | 0.60 | 0.49 | -0.75 | 0.82 | 1.00E-02 | IL1RL1(dist=2668), IL18R1(dist=1578)             | intergenic     |
| 14 | 105086888 | A | G | rs7155600               | 2.67E-01 | 0.128 | 0.138 | 1.09 | 0.91 | -1.31 | 4.68E-06 | 0.173 | 0.126 | 0.69 | 0.59 | -0.81 | 0.84 | 1.01E-02 | TMEM179(dist=15791), MIR4710(dist=57143)         | intergenic     |
| 2  | 102957532 | T | C | rs3732129               | 5.94E-01 | 0.101 | 0.087 | 1.17 | 0.95 | -1.45 | 3.99E-05 | 0.076 | 0.120 | 0.60 | 0.49 | -0.75 | 0.82 | 1.01E-02 | IL1RL1                                           | intronic       |
| 9  | 14272621  | G | A | rs114595228             | 7.30E-01 | 0.032 |       |      |      |       |          |       |       |      |      |       |      |          |                                                  |                |

|    |           |   |   |                        |          |       |       |      |      |       |          |       |       |      |      |       |      |            |                                                |                |
|----|-----------|---|---|------------------------|----------|-------|-------|------|------|-------|----------|-------|-------|------|------|-------|------|------------|------------------------------------------------|----------------|
| 5  | 40986374  | T | C | rs73750218             | 3.70E-05 | 0.062 | 0.033 | 1.94 | 1.45 | -2.59 | 6.78E-01 | 0.046 | 0.052 | 0.86 | 0.65 | -1.14 | 1.35 | 1.02E-02   | C7(dist=3332), MROH2B(dist=11748)              | intergenic     |
| 4  | 106668358 | A | G | rs7676226              | 5.05E-05 | 0.055 | 0.033 | 0.57 | 0.43 | -0.77 | 8.92E-01 | 0.042 | 0.045 | 1.08 | 0.81 | -1.45 | 0.75 | 1.02E-02   | GSTCD                                          | intronic       |
| 5  | 3507223   | T | C | rs11955601             | 7.71E-01 | 0.047 | 0.051 | 0.93 | 0.69 | -1.24 | 5.27E-05 | 0.073 | 0.046 | 1.64 | 1.29 | -2.07 | 1.33 | 1.03E-02   | LINC01019                                      | ncRNA_intronic |
| 2  | 58638135  | A | C | rs11125754             | 4.90E-05 | 0.188 | 0.228 | 1.28 | 1.09 | -1.49 | 8.28E-01 | 0.243 | 0.254 | 1.06 | 0.92 | -1.21 | 1.15 | 1.03E-02   | FANCL(dist=169620), LINC01122(dist=109753)     | intergenic     |
| 4  | 35965403  | T | A | rs60907552             | 5.30E-05 | 0.447 | 0.388 | 0.78 | 0.69 | -0.89 | 7.43E-01 | 0.405 | 0.414 | 1.04 | 0.92 | -1.17 | 0.89 | 1.03E-02   | LOC101928622(dist=1923888), ARAP2(dist=102217) | intergenic     |
| 6  | 91519293  | C | G | rs78866506             | 8.64E-01 | 0.031 | 0.034 | 0.89 | 0.62 | -1.27 | 2.53E-05 | 0.037 | 0.021 | 1.78 | 1.28 | -2.47 | 1.56 | 1.04E-02   | MAP3K7(dist=222273), MIR4643(dist=712085)      | intergenic     |
| 8  | 5958623   | G | C | rs17076042             | 5.47E-01 | 0.160 | 0.178 | 0.88 | 0.75 | -1.04 | 9.82E-06 | 0.190 | 0.139 | 1.46 | 1.25 | -1.7  | 1.18 | 1.04E-02   | CSMD1(dist=1106295), LOC100287015(dist=302454) | intergenic     |
| 2  | 58652438  | A | T | rs10179027             | 5.57E-05 | 0.198 | 0.240 | 1.28 | 1.1  | -1.49 | 8.22E-01 | 0.255 | 0.265 | 1.05 | 0.92 | -1.2  | 1.15 | 1.04E-02   | FANCL(dist=183923), LINC01122(dist=95450)      | intergenic     |
| 4  | 92460368  | T | C | rs28706529             | 5.92E-01 | 0.107 | 0.112 | 0.94 | 0.77 | -1.15 | 3.71E-05 | 0.143 | 0.100 | 1.50 | 1.26 | -1.78 | 1.20 | 1.05E-02   | CCSER1                                         | intronic       |
| 4  | 92461942  | C | T | rs6835281              | 5.92E-01 | 0.107 | 0.112 | 0.94 | 0.77 | -1.15 | 3.71E-05 | 0.143 | 0.100 | 1.50 | 1.26 | -1.78 | 1.20 | 1.05E-02   | CCSER1                                         | intronic       |
| 5  | 73710927  | C | G | rs73762716;rs386689076 | 6.58E-01 | 0.107 | 0.114 | 0.93 | 0.76 | -1.13 | 2.90E-05 | 0.139 | 0.099 | 1.47 | 1.23 | -1.75 | 1.21 | 1.05E-02   | LINC01331                                      | ncRNA_intronic |
| 4  | 92464714  | C | T | rs998223               | 5.89E-01 | 0.107 | 0.112 | 0.94 | 0.77 | -1.15 | 3.68E-05 | 0.143 | 0.100 | 1.50 | 1.26 | -1.78 | 1.20 | 1.05E-02   | CCSER1                                         | intronic       |
| 4  | 92466814  | T | C | rs72884660             | 5.87E-01 | 0.107 | 0.112 | 0.94 | 0.77 | -1.15 | 3.67E-05 | 0.143 | 0.100 | 1.50 | 1.26 | -1.78 | 1.20 | 1.06E-02   | CCSER1                                         | intronic       |
| 4  | 92467753  | A | T | rs72884663             | 5.86E-01 | 0.107 | 0.112 | 0.94 | 0.77 | -1.15 | 3.66E-05 | 0.143 | 0.100 | 1.50 | 1.26 | -1.78 | 1.20 | 1.06E-02   | CCSER1                                         | intronic       |
| 4  | 92468554  | G | A | rs7688661              | 5.86E-01 | 0.107 | 0.112 | 0.94 | 0.77 | -1.15 | 3.66E-05 | 0.143 | 0.100 | 1.50 | 1.26 | -1.78 | 1.20 | 1.06E-02   | CCSER1                                         | intronic       |
| 1  | 56953209  | C | A | rs6664934              | 3.02E-05 | 0.319 | 0.384 | 1.33 | 1.16 | -1.51 | 5.61E-01 | 0.351 | 0.344 | 0.97 | 0.86 | -1.1  | 1.13 | 1.06E-02   | MIR4422(dist=1261813), PPAP2B(dist=7210)       | intergenic     |
| 5  | 73716436  | C | T | rs73762720             | 6.29E-01 | 0.106 | 0.114 | 0.92 | 0.76 | -1.13 | 2.24E-05 | 0.138 | 0.098 | 1.47 | 1.24 | -1.75 | 1.21 | 1.06E-02   | LINC01331                                      | ncRNA_intronic |
| 8  | 5957660   | A | C | rs73660517             | 5.77E-01 | 0.163 | 0.180 | 0.89 | 0.75 | -1.05 | 1.35E-05 | 0.192 | 0.142 | 1.44 | 1.24 | -1.68 | 1.18 | 1.06E-02   | CSMD1(dist=1105332), LOC100287015(dist=303417) | intergenic     |
| 10 | 32369540  | G | A | rs73257540             | 1.58E-05 | 0.141 | 0.202 | 0.65 | 0.55 | -0.77 | 9.02E-01 | 0.191 | 0.184 | 1.04 | 0.9  | -1.21 | 0.85 | 1.07E-02   | KIF5B(dist=24169), EPC1(dist=187104)           | intergenic     |
| 2  | 58633553  | C | T | rs2192663              | 4.42E-05 | 0.195 | 0.236 | 1.27 | 1.09 | -1.48 | 7.89E-01 | 0.246 | 0.256 | 1.05 | 0.92 | -1.21 | 1.15 | 1.07E-02   | FANCL(dist=165038), LINC01122(dist=114335)     | intergenic     |
| 3  | 174250285 | A | G | rs1473977              | 5.88E-05 | 0.162 | 0.121 | 0.71 | 0.6  | -0.85 | 8.32E-01 | 0.141 | 0.146 | 1.04 | 0.88 | -1.23 | 0.82 | 1.07E-02   | NLGN1(dist=249146), NAALADL2(dist=326826)      | intergenic     |
| 4  | 35976738  | C | T | rs1622680              | 4.32E-06 | 0.171 | 0.120 | 0.66 | 0.55 | -0.78 | 4.88E-01 | 0.146 | 0.164 | 1.14 | 0.97 | -1.35 | 0.85 | 1.07E-02   | LOC101928622(dist=1935223), ARAP2(dist=90882)  | intergenic     |
| 4  | 35974205  | C | T | rs1655079              | 4.54E-06 | 0.171 | 0.119 | 0.66 | 0.55 | -0.78 | 4.93E-01 | 0.146 | 0.164 | 1.14 | 0.97 | -1.35 | 0.85 | 1.07E-02   | LOC101928622(dist=1932690), ARAP2(dist=93451)  | intergenic     |
| 6  | 22488787  | T | G | rs78935478             | 7.40E-01 | 0.027 | 0.028 | 0.95 | 0.65 | -1.39 | 2.63E-05 | 0.039 | 0.021 | 1.85 | 1.34 | -2.56 | 1.50 | 1.07E-02   | PRL(dist=185705), HDGFL1(dist=80891)           | intergenic     |
| 5  | 59013793  | T | C | rs17742447             | 4.96E-01 | 0.114 | 0.099 | 1.17 | 0.96 | -1.42 | 3.72E-05 | 0.097 | 0.144 | 0.64 | 0.52 | -0.77 | 0.83 | 1.07E-02   | PDE4D                                          | intronic       |
| 2  | 102955683 | G | T | rs873022               | 5.73E-01 | 0.101 | 0.087 | 1.18 | 0.95 | -1.46 | 4.21E-05 | 0.076 | 0.120 | 0.60 | 0.49 | -0.75 | 0.82 | 1.08E-02   | IL1RL1                                         | intronic       |
| 4  | 35971570  | G | C | rs1655065              | 4.58E-06 | 0.171 | 0.120 | 0.66 | 0.55 | -0.78 | 4.92E-01 | 0.146 | 0.164 | 1.14 | 0.97 | -1.35 | 0.85 | 1.08E-02   | LOC101928622(dist=1930055), ARAP2(dist=96050)  | intergenic     |
| 14 | 95946228  | A | G | rs73340098             | 1.85E-05 | 0.295 | 0.253 | 1.24 | 1.08 | -1.42 | 6.04E-01 | 0.243 | 0.237 | 1.03 | 0.9  | -1.19 | 1.15 | 1.08E-02   | SYNE3(dist=4055), SNHG10(dist=53021)           | intergenic     |
| 2  | 158814154 | C | T | rs13032042             | 4.24E-01 | 0.029 | 0.028 | 1.04 | 0.72 | -1.51 | 1.49E-05 | 0.051 | 0.033 | 1.58 | 1.2  | -2.09 | 1.43 | 1.08E-02   | ACVR1(dist=81780), UPP2(dist=37537)            | intergenic     |
| 4  | 35974806  | G | A | rs1714086              | 4.55E-06 | 0.171 | 0.119 | 0.66 | 0.55 | -0.78 | 4.91E-01 | 0.146 | 0.164 | 1.14 | 0.97 | -1.35 | 0.85 | 1.08E-02   | LOC101928622(dist=1933291), ARAP2(dist=92814)  | intergenic     |
| 4  | 35974513  | G | A | rs1714087              | 4.60E-06 | 0.171 | 0.119 | 0.66 | 0.55 | -0.78 | 4.92E-01 | 0.146 | 0.164 | 1.14 | 0.97 | -1.35 | 0.85 | 1.09E-02   | LOC101928622(dist=1932998), ARAP2(dist=93107)  | intergenic     |
| 4  | 35977058  | C | T | rs1714104              | 4.47E-06 | 0.171 | 0.120 | 0.66 | 0.55 | -0.78 | 4.87E-01 | 0.147 | 0.164 | 1.14 | 0.97 | -1.35 | 0.85 | 1.09E-02   | LOC101928622(dist=1935543), ARAP2(dist=90562)  | intergenic     |
| 10 | 51503559  | G | C | rs2611471              | 1.14E-05 | 0.253 | 0.186 | 1.48 | 1.28 | -1.71 | 8.42E-01 | 0.226 | 0.236 | 0.94 | 0.82 | -1.08 | 1.16 | 1.09E-02   | TIMM23B                                        | intronic       |
| 7  | 78990053  | T | C | rs10235466             | 7.05E-01 | 0.098 | 0.104 | 0.95 | 0.77 | -1.16 | 2.81E-05 | 0.121 | 0.085 | 1.47 | 1.22 | -1.77 | 1.23 | 1.10E-02   | MAGI2                                          | intronic       |
| 10 | 51502802  | G | C | rs113082846            | 1.12E-05 | 0.253 | 0.186 | 1.48 | 1.28 | -1.72 | 8.36E-01 | 0.226 | 0.236 | 0.94 | 0.82 | -1.08 | 1.16 | 1.10E-02   | TIMM23B                                        | intronic       |
| 10 | 58712077  | T | C | rs10740693             | 6.42E-05 | 0.438 | 0.357 | 1.41 | 1.24 | -1.59 | 9.00E-01 | 0.405 | 0.413 | 0.97 | 0.86 | -1.09 | 1.13 | 1.10E-02   | ZWINT(dist=591043), MIR3924(dist=352162)       | intergenic     |
| 8  | 5957456   | A | G | rs17076034             | 4.23E-01 | 0.172 | 0.191 | 0.88 | 0.75 | -1.04 | 5.72E-06 | 0.220 | 0.168 | 1.40 | 1.21 | -1.62 | 1.17 | 1.10E-02   | CSMD1(dist=1105128), LOC100287015(dist=303621) | intergenic     |
| 4  | 75026531  | G | A | rs148071950            | 2.25E-05 | 0.045 | 0.025 | 1.80 | 1.29 | -2.52 | 4.34E-01 | 0.021 | 0.022 | 0.93 | 0.62 | -1.39 | 1.50 | 1.11E-02   | MTHFD2L                                        | intronic       |
| 10 | 58722527  | T | C | rs2393189              | 6.27E-05 | 0.455 | 0.374 | 1.39 | 1.23 | -1.58 | 9.06E-01 | 0.420 | 0.428 | 0.97 | 0.86 | -1.09 | 1.13 | 1.11E-02   | ZWINT(dist=601493), MIR3924(dist=341712)       | intergenic     |
| 9  | 8827680   | A | G | rs7863174              | 4.61E-05 | 0.077 | 0.051 | 1.56 | 1.22 | -2    | 7.08E-01 | 0.051 | 0.050 | 1.01 | 0.77 | -1.32 | 1.29 | 1.12E-02   | PTPRD                                          | intronic       |
| 1  | 56954622  | A | G | rs11811433             | 1.26E-05 | 0.327 | 0.394 | 1.34 | 1.18 | -1.53 | 4.06E-01 | 0.381 | 0.369 | 0.95 | 0.84 | -1.07 | 1.13 | 1.12E-02   | MIR4422(dist=1263226), PPAP2B(dist=5797)       | intergenic     |
| 13 | 109668204 | T | C | rs150726179            | 4.92E-05 | 0.047 | 0.029 | 1.67 | 1.21 | -2.3  | 4.65E-01 | 0.025 | 0.027 | 0.93 | 0.64 | -1.35 | 1.46 | 1.12E-02   | MYO16                                          | intronic       |
| 8  | 5959685   | G | T | rs76278735             | 5.31E-01 | 0.160 | 0.178 | 0.88 | 0.74 | -1.04 | 1.06E-05 | 0.190 | 0.139 | 1.46 | 1.25 | -1.7  | 1.18 | 1.12E-02   | CSMD1(dist=1107357), LOC100287015(dist=301392) | intergenic     |
| 4  | 92455746  | A | G | rs28558311             | 5.67E-01 | 0.105 | 0.111 | 0.94 | 0.77 | -1.15 | 4.24E-05 | 0.143 | 0.101 | 1.49 | 1.26 | -1.77 | 1.20 | 1.13E-02   | CCSER1                                         | intronic       |
| 2  | 102969807 | C | T | rs67723747             | 5.91E-01 | 0.097 | 0.083 | 1.19 | 0.96 | -1.47 | 6.06E-05 | 0.076 | 0.119 | 0.61 | 0.49 | -0.75 | 0.82 | 1.13E-02   | IL1RL1(dist=1310), IL18R1(dist=2936)           | intergenic     |
| 4  | 35967246  | G | A | rs1655036              | 9.22E-06 | 0.325 | 0.260 | 0.73 | 0.64 | -0.84 | 5.02E-01 | 0.286 | 0.300 | 1.07 | 0.94 | -1.22 | 0.88 | 1.13E-02   | LOC101928622(dist=1925731), ARAP2(dist=100374) | intergenic     |
| 7  | 78992464  | C | T | rs10226131             | 6.92E-01 | 0.098 | 0.103 | 0.94 | 0.77 | -1.16 | 2.77E-05 | 0.120 | 0.085 | 1.47 | 1.22 | -1.77 | 1.23 | 1.13E-02   | MAGI2                                          | intronic       |
| 7  | 78992025  | A | G | rs10240656             | 6.91E-01 | 0.098 | 0.103 | 0.94 | 0.77 | -1.16 | 2.78E-05 | 0.120 | 0.085 | 1.47 | 1.22 | -1.77 | 1.23 | 1.13E-02   | MAGI2                                          | intronic       |
| 4  | 92449977  | A | G | rs7680125              | 5.66E-01 | 0.105 | 0.111 | 0.94 | 0.77 | -1.15 | 4.34E-05 | 0.143 | 0.101 | 1.49 | 1.25 | -1.77 | 1.20 | 1.14E-02   | CCSER1                                         | intronic       |
| 4  | 92449995  | T | G | rs7658432              | 5.66E-01 | 0.105 | 0.111 | 0.94 | 0.77 | -1.15 | 4.34E-05 | 0.143 | 0.101 | 1.49 | 1.25 | -1.77 | 1.20 | 1.14E-02   | CCSER1                                         | intronic       |
| 1  | 56958037  | A | G | rs11206828             | 4.84E-05 | 0.302 | 0.365 | 1.33 | 1.16 | -1.52 | 6.10E-01 | 0.339 | 0.331 | 0.97 | 0.85 | -1.09 | 1.14 | 1.15E-02   | MIR4422(dist=1266641), PPAP2B(dist=2382)       | intergenic     |
| 15 | 27629651  | A | G | rs116165748            | 8.92E-01 | 0.043 | 0.044 | 0.98 | 0.72 | -1.33 | 6.11E-05 | 0.042 | 0.024 | 1.77 | 1.3  | -2.41 | 1.40 | 1.15E-02   | GABRG3                                         | intronic       |
| 15 | 27629680  | T | A | rs114882293            | 8.93E-01 | 0.043 | 0.044 | 0.98 | 0.72 | -1.33 | 6.11E-05 | 0.042 | 0.024 | 1.77 | 1.3  | -2.41 | 1.40 | 1.16E-02   | GABRG3                                         | intronic       |
| 19 | 48863386  | C | T | rs438767               | 5.31E-01 | 0.363 | 0.363 | 1.00 | 0.88 | -1.14 | 4.76E-05 | 0.430 | 0.385 | 1.21 | 1.07 | -1.36 | 1.13 | 1.17E-02   | TMEM143                                        | exonic         |
| 1  | 116251152 | G | A | rs4535998;rs67692933   | 5.75E-01 | 0.445 | 0.445 | 1.00 | 0.88 | -1.13 | 3.96E-05 | 0.486 | 0.438 | 0.82 | 0.73 | -0.93 | 0.89 | 1.17E-02   | CASQ2                                          | intronic       |
| 7  | 5566117   | T | C | rs13447420             | 6.00E-01 | 0.034 | 0.039 | 0.86 | 0.61 | -1.2  | 1.07E-06 | 0.043 | 0.025 | 1.76 | 1.3  | -2.4  | 1.50 | 1.18E-02   | ACTB, LOC221946                                | downstream     |
| 10 | 58720513  | A | C | rs7910003              | 3.53E-05 | 0.437 | 0.354 | 1.41 | 1.24 | -1.6  | 9.67E-01 | 0.402 | 0.413 | 0.96 | 0.85 | -1.08 | 1.13 | 1.18E-02</ |                                                |                |

|    |           |   |   |                        |          |       |       |      |      |       |          |       |       |      |      |       |      |          |                                                     |                |
|----|-----------|---|---|------------------------|----------|-------|-------|------|------|-------|----------|-------|-------|------|------|-------|------|----------|-----------------------------------------------------|----------------|
| 6  | 29853299  | G | A | rs190116962            | 3.82E-05 | 0.022 | 0.044 | 0.50 | 0.34 | -0.73 | 8.46E-01 | 0.042 | 0.039 | 1.09 | 0.81 | -1.46 | 0.73 | 1.20E-02 | HLA-G(dist=54400), HLA-H(dist=2238)                 | intergenic     |
| 4  | 122521660 | T | C | rs4833748              | 4.66E-01 | 0.248 | 0.235 | 1.07 | 0.93 | -1.24 | 4.67E-05 | 0.209 | 0.272 | 0.71 | 0.62 | -0.82 | 0.88 | 1.20E-02 | QRFPR(dist=219479), ANXA5(dist=67492)               | intergenic     |
| 7  | 79005116  | C | T | rs10257558             | 5.91E-01 | 0.105 | 0.112 | 0.93 | 0.76 | -1.14 | 1.86E-05 | 0.135 | 0.097 | 1.46 | 1.22 | -1.74 | 1.21 | 1.21E-02 | MAGI2                                               | intronic       |
| 11 | 7855688   | T | C | rs1384511              | 4.96E-01 | 0.421 | 0.397 | 1.11 | 0.98 | -1.26 | 1.53E-05 | 0.352 | 0.425 | 0.73 | 0.65 | -0.83 | 0.89 | 1.21E-02 | OR5P3(dist=8169), OR5E1P(dist=14910)                | intergenic     |
| 18 | 72344238  | C | T | rs17817969             | 9.88E-06 | 0.089 | 0.132 | 0.64 | 0.52 | -0.78 | 4.17E-01 | 0.116 | 0.111 | 1.06 | 0.88 | -1.27 | 0.84 | 1.21E-02 | ZNF407                                              | exonic         |
| 7  | 79005504  | A | G | rs10273372             | 5.90E-01 | 0.105 | 0.112 | 0.93 | 0.76 | -1.14 | 1.91E-05 | 0.135 | 0.097 | 1.46 | 1.22 | -1.74 | 1.21 | 1.22E-02 | MAGI2                                               | intronic       |
| 12 | 228948    | C | G | rs10849572             | 4.09E-05 | 0.444 | 0.504 | 1.28 | 1.13 | -1.45 | 6.60E-01 | 0.453 | 0.442 | 0.96 | 0.85 | -1.08 | 1.13 | 1.22E-02 | IQSEC3                                              | intronic       |
| 10 | 130854225 | C | T | rs12411337             | 2.71E-01 | 0.024 | 0.026 | 0.89 | 0.6  | -1.33 | 3.23E-05 | 0.055 | 0.040 | 1.41 | 1.08 | -1.83 | 1.53 | 1.22E-02 | LINC01163(dist=738235), MGMT(dist=411229)           | intergenic     |
| 11 | 120973430 | A | G | rs35507522             | 7.91E-01 | 0.104 | 0.104 | 0.99 | 0.81 | -1.22 | 5.55E-05 | 0.067 | 0.095 | 0.68 | 0.54 | -0.86 | 0.82 | 1.22E-02 | TECTA                                               | exonic         |
| 4  | 92445258  | C | T | rs28452136             | 5.59E-01 | 0.105 | 0.111 | 0.94 | 0.77 | -1.15 | 5.12E-05 | 0.143 | 0.101 | 1.48 | 1.25 | -1.76 | 1.20 | 1.22E-02 | CCSER1                                              | intronic       |
| 7  | 62833407  | C | G | rs12666951             | 6.96E-01 | 0.050 | 0.052 | 0.95 | 0.71 | -1.26 | 5.88E-05 | 0.068 | 0.042 | 1.66 | 1.3  | -2.13 | 1.31 | 1.22E-02 | LOC100287834(dist=21255), LOC100287834(dist=23311)  | intergenic     |
| 15 | 24876930  | T | A | rs137900425            | 6.53E-01 | 0.028 | 0.034 | 0.83 | 0.58 | -1.19 | 5.89E-05 | 0.049 | 0.027 | 1.82 | 1.36 | -2.43 | 1.38 | 1.22E-02 | PWRN1(dist=44004), NPAP1(dist=43611)                | intergenic     |
| 3  | 64009102  | G | T | rs35836                | 2.98E-01 | 0.132 | 0.153 | 0.84 | 0.7  | -1.01 | 4.67E-06 | 0.168 | 0.121 | 1.47 | 1.25 | -1.73 | 1.18 | 1.23E-02 | PSMD6                                               | UTR5           |
| 4  | 92442209  | C | T | rs72884604             | 5.78E-01 | 0.105 | 0.110 | 0.94 | 0.77 | -1.15 | 5.98E-05 | 0.143 | 0.101 | 1.48 | 1.24 | -1.76 | 1.20 | 1.23E-02 | CCSER1                                              | intronic       |
| 1  | 56956515  | T | C | rs4912303              | 6.48E-05 | 0.316 | 0.378 | 1.32 | 1.15 | -1.5  | 6.33E-01 | 0.349 | 0.343 | 0.97 | 0.86 | -1.1  | 1.13 | 1.23E-02 | MIR4422(dist=1265119), PPAP2B(dist=3904)            | intergenic     |
| 17 | 8932356   | A | G | rs7218289              | 7.10E-01 | 0.110 | 0.108 | 0.98 | 0.8  | -1.19 | 4.40E-05 | 0.149 | 0.122 | 0.79 | 0.67 | -0.94 | 0.82 | 1.24E-02 | NTN1                                                | intronic       |
| 6  | 29852389  | C | T | rs116271498            | 4.11E-05 | 0.022 | 0.043 | 0.50 | 0.34 | -0.73 | 8.44E-01 | 0.042 | 0.039 | 1.09 | 0.81 | -1.46 | 0.73 | 1.25E-02 | HLA-G(dist=53490), HLA-H(dist=3148)                 | intergenic     |
| 11 | 7856259   | T | C | rs10769838             | 4.87E-01 | 0.422 | 0.397 | 1.11 | 0.98 | -1.26 | 1.57E-05 | 0.352 | 0.426 | 0.73 | 0.65 | -0.83 | 0.89 | 1.25E-02 | OR5P3(dist=8740), OR5E1P(dist=14339)                | intergenic     |
| 7  | 79009106  | C | A | rs10252300             | 5.99E-01 | 0.105 | 0.112 | 0.93 | 0.76 | -1.14 | 2.22E-05 | 0.135 | 0.097 | 1.45 | 1.22 | -1.73 | 1.21 | 1.26E-02 | MAGI2                                               | intronic       |
| 10 | 34417835  | A | G | rs1415546              | 4.79E-06 | 0.303 | 0.377 | 0.72 | 0.63 | -0.82 | 6.54E-01 | 0.347 | 0.340 | 1.03 | 0.91 | -1.17 | 0.88 | 1.27E-02 | PARD3                                               | intronic       |
| 10 | 32371056  | C | T | rs12246092;rs386742718 | 3.86E-05 | 0.102 | 0.151 | 0.64 | 0.52 | -0.78 | 9.54E-01 | 0.138 | 0.134 | 1.04 | 0.87 | -1.23 | 0.84 | 1.28E-02 | KIF5B(dist=25685), EPC1(dist=185588)                | intergenic     |
| 11 | 7856890   | G | T | rs10769840             | 4.81E-01 | 0.422 | 0.396 | 1.11 | 0.98 | -1.26 | 1.58E-05 | 0.352 | 0.426 | 0.73 | 0.65 | -0.83 | 0.89 | 1.28E-02 | OR5P3(dist=9371), OR5E1P(dist=13708)                | intergenic     |
| 11 | 7856509   | G | T | rs3280                 | 4.83E-01 | 0.422 | 0.397 | 1.11 | 0.98 | -1.26 | 1.60E-05 | 0.352 | 0.426 | 0.73 | 0.65 | -0.83 | 0.89 | 1.28E-02 | OR5P3(dist=8990), OR5E1P(dist=14089)                | intergenic     |
| 13 | 114605831 | G | A | rs77565662             | 2.99E-05 | 0.061 | 0.035 | 1.79 | 1.34 | -2.38 | 7.07E-01 | 0.045 | 0.043 | 1.03 | 0.77 | -1.36 | 1.32 | 1.28E-02 | LINC00452                                           | intronic       |
| 7  | 79010235  | C | G | rs78254548             | 5.82E-01 | 0.103 | 0.110 | 0.93 | 0.76 | -1.14 | 2.21E-05 | 0.133 | 0.095 | 1.46 | 1.22 | -1.74 | 1.21 | 1.28E-02 | MAGI2                                               | intronic       |
| 7  | 113472564 | C | T | rs10265135             | 4.52E-01 | 0.233 | 0.253 | 0.90 | 0.78 | -1.04 | 9.84E-06 | 0.267 | 0.210 | 1.37 | 1.2  | -1.57 | 1.15 | 1.28E-02 | LINC00998(dist=713927), PPP1R3A(dist=44318)         | intergenic     |
| 19 | 34558765  | C | T | rs244765               | 4.22E-05 | 0.415 | 0.469 | 0.80 | 0.71 | -0.91 | 6.71E-01 | 0.468 | 0.474 | 0.98 | 0.87 | -1.1  | 0.89 | 1.28E-02 | KCTD15(dist=252099), LSM14A(dist=104587)            | intergenic     |
| 8  | 17868799  | T | C | rs36007178             | 5.30E-01 | 0.030 | 0.035 | 0.85 | 0.59 | -1.21 | 3.79E-05 | 0.046 | 0.025 | 1.88 | 1.4  | -2.54 | 1.42 | 1.29E-02 | PCM1                                                | exonic         |
| 11 | 7856414   | T | C | rs10839882             | 4.89E-01 | 0.421 | 0.396 | 1.11 | 0.98 | -1.26 | 1.71E-05 | 0.352 | 0.425 | 0.73 | 0.65 | -0.83 | 0.89 | 1.29E-02 | OR5P3(dist=8895), OR5E1P(dist=14184)                | intergenic     |
| 2  | 60153321  | C | G | rs6751255              | 4.60E-01 | 0.320 | 0.308 | 0.94 | 0.83 | -1.08 | 2.35E-05 | 0.267 | 0.329 | 1.35 | 1.18 | -1.53 | 1.13 | 1.29E-02 | LOC101927285(dist=646786), MIR4432(dist=461176)     | intergenic     |
| 5  | 58985328  | G | C | rs298077               | 4.69E-01 | 0.174 | 0.160 | 0.90 | 0.76 | -1.06 | 2.86E-05 | 0.152 | 0.200 | 1.40 | 1.19 | -1.64 | 1.19 | 1.29E-02 | PDE4D                                               | intronic       |
| 11 | 18610041  | C | T | rs61884724             | 2.71E-01 | 0.028 | 0.029 | 0.94 | 0.65 | -1.37 | 7.12E-06 | 0.054 | 0.037 | 1.48 | 1.13 | -1.93 | 1.42 | 1.29E-02 | UEVLD                                               | intronic       |
| 5  | 117747565 | A | C | rs61484922             | 4.60E-01 | 0.083 | 0.096 | 0.85 | 0.68 | -1.06 | 5.51E-06 | 0.106 | 0.069 | 1.61 | 1.32 | -1.96 | 1.24 | 1.29E-02 | LOC101927280                                        | ncRNA_intronic |
| 18 | 72335162  | T | G | rs57377990             | 1.58E-05 | 0.090 | 0.133 | 0.65 | 0.52 | -0.79 | 4.50E-01 | 0.117 | 0.112 | 1.05 | 0.88 | -1.26 | 0.84 | 1.29E-02 | LINC00909(dist=70091), ZNF407(dist=7757)            | intergenic     |
| 4  | 35973884  | G | A | rs1025519              | 6.25E-06 | 0.173 | 0.122 | 0.66 | 0.56 | -0.79 | 4.75E-01 | 0.147 | 0.165 | 1.15 | 0.97 | -1.35 | 0.85 | 1.30E-02 | LOC101928622(dist=1932369), ARAP2(dist=93736)       | intergenic     |
| 7  | 5560558   | A | C | rs144924072            | 7.24E-01 | 0.042 | 0.047 | 0.89 | 0.66 | -1.21 | 3.52E-05 | 0.048 | 0.028 | 1.73 | 1.29 | -2.31 | 1.41 | 1.31E-02 | LOC221946                                           | ncRNA_intronic |
| 19 | 34558612  | A | G | rs244763               | 4.47E-05 | 0.415 | 0.470 | 0.80 | 0.71 | -0.91 | 6.71E-01 | 0.468 | 0.474 | 0.98 | 0.87 | -1.1  | 0.89 | 1.31E-02 | KCTD15(dist=251946), LSM14A(dist=104740)            | intergenic     |
| 20 | 20987823  | A | T | rs12625858             | 6.51E-01 | 0.299 | 0.306 | 0.97 | 0.84 | -1.11 | 5.97E-05 | 0.283 | 0.321 | 0.83 | 0.73 | -0.95 | 0.88 | 1.31E-02 | RALGAPA2(dist=294557), KIZ(dist=118801)             | intergenic     |
| 7  | 79000955  | C | T | rs6943036              | 5.95E-01 | 0.105 | 0.112 | 0.93 | 0.76 | -1.14 | 2.41E-05 | 0.136 | 0.098 | 1.45 | 1.21 | -1.72 | 1.21 | 1.32E-02 | MAGI2                                               | intronic       |
| 6  | 146665311 | A | G | rs12110433             | 6.53E-01 | 0.028 | 0.032 | 0.88 | 0.61 | -1.27 | 6.27E-05 | 0.042 | 0.024 | 1.77 | 1.3  | -2.41 | 1.48 | 1.32E-02 | GRM1                                                | intronic       |
| 4  | 122513549 | A | T | rs12511308             | 4.14E-01 | 0.236 | 0.223 | 1.08 | 0.93 | -1.25 | 4.58E-05 | 0.200 | 0.262 | 0.71 | 0.61 | -0.82 | 0.87 | 1.32E-02 | QRFPR(dist=211368), ANXA5(dist=75603)               | intergenic     |
| 18 | 4842808   | T | C | rs4561559              | 6.80E-01 | 0.116 | 0.125 | 1.09 | 0.9  | -1.32 | 5.42E-05 | 0.146 | 0.109 | 0.72 | 0.61 | -0.85 | 0.82 | 1.32E-02 | DLGAP1(dist=387542), C18orf42(dist=300864)          | intergenic     |
| 2  | 212366480 | T | C | rs62178814             | 9.96E-01 | 0.165 | 0.168 | 0.97 | 0.82 | -1.15 | 5.66E-05 | 0.177 | 0.140 | 1.32 | 1.13 | -1.54 | 1.19 | 1.32E-02 | ERBB4                                               | intronic       |
| 18 | 72344553  | G | A | rs7227391              | 1.31E-05 | 0.089 | 0.133 | 0.64 | 0.52 | -0.79 | 4.18E-01 | 0.116 | 0.111 | 1.06 | 0.88 | -1.27 | 0.84 | 1.33E-02 | ZNF407                                              | exonic         |
| 13 | 114601545 | C | T | rs116434894            | 3.68E-05 | 0.060 | 0.034 | 1.78 | 1.33 | -2.37 | 7.37E-01 | 0.043 | 0.042 | 1.03 | 0.78 | -1.38 | 1.32 | 1.35E-02 | LINC00452(NM_001278674:c.17299C>T)                  | UTR5           |
| 4  | 92437174  | G | A | rs28806469             | 5.53E-01 | 0.104 | 0.110 | 0.94 | 0.77 | -1.15 | 6.23E-05 | 0.142 | 0.101 | 1.48 | 1.24 | -1.76 | 1.20 | 1.35E-02 | CCSER1                                              | intronic       |
| 12 | 936785    | A | G | rs141099218            | 5.76E-05 | 0.061 | 0.039 | 1.60 | 1.21 | -2.12 | 8.15E-01 | 0.045 | 0.044 | 1.02 | 0.77 | -1.36 | 1.31 | 1.36E-02 | WNK1                                                | intronic       |
| 8  | 3117292   | G | A | rs1444615              | 5.61E-01 | 0.315 | 0.327 | 1.06 | 0.93 | -1.21 | 4.09E-05 | 0.352 | 0.290 | 0.76 | 0.67 | -0.85 | 0.88 | 1.36E-02 | CSMD1                                               | intronic       |
| 10 | 51492131  | G | A | rs2926493              | 5.26E-05 | 0.261 | 0.196 | 1.45 | 1.25 | -1.68 | 9.42E-01 | 0.248 | 0.258 | 0.95 | 0.83 | -1.08 | 1.16 | 1.36E-02 | TIMM23B                                             | intronic       |
| 12 | 932221    | T | G | rs74610807             | 5.64E-05 | 0.061 | 0.039 | 1.60 | 1.21 | -2.12 | 8.11E-01 | 0.045 | 0.044 | 1.02 | 0.77 | -1.36 | 1.31 | 1.36E-02 | WNK1                                                | intronic       |
| 5  | 7372296   | C | T | rs116436633            | 6.19E-01 | 0.048 | 0.050 | 0.94 | 0.71 | -1.26 | 5.49E-05 | 0.068 | 0.045 | 1.54 | 1.21 | -1.97 | 1.36 | 1.36E-02 | LOC442132(dist=65469), ADCY2(dist=24047)            | intergenic     |
| 14 | 105084994 | C | A | rs11625738             | 2.34E-01 | 0.128 | 0.140 | 1.10 | 0.92 | -1.33 | 5.20E-06 | 0.176 | 0.130 | 0.70 | 0.6  | -0.82 | 0.85 | 1.36E-02 | TMEM179(dist=13897), MIR4710(dist=59037)            | intergenic     |
| 12 | 930891    | G | A | rs116359592            | 5.67E-05 | 0.061 | 0.039 | 1.60 | 1.21 | -2.12 | 8.11E-01 | 0.045 | 0.044 | 1.02 | 0.77 | -1.36 | 1.31 | 1.37E-02 | WNK1                                                | intronic       |
| 6  | 67871861  | G | A | rs1584839              | 4.89E-05 | 0.464 | 0.397 | 1.31 | 1.16 | -1.49 | 6.75E-01 | 0.412 | 0.436 | 0.91 | 0.8  | -1.02 | 1.12 | 1.37E-02 | SLC25A51P1(dist=1372485), LOC102723883(dist=893382) | intergenic     |
| 10 | 51521684  | T | G | rs2249986              | 8.51E-06 | 0.257 | 0.187 | 1.51 | 1.3  | -1.75 | 7.33E-01 | 0.224 | 0.237 | 0.93 | 0.81 | -1.07 | 1.15 | 1.37E-02 | TIMM23B                                             | intronic       |
| 13 | 22750352  | G | A | rs9580311              | 3.29E-01 | 0.171 | 0.154 | 1.13 | 0.96 | -1.34 | 8.34E-06 | 0.130 | 0.179 | 0.69 | 0.58 | -0.81 | 0.85 | 1.38E-02 | LINC00424(dist=298053), LINC00540(dist=34072)       | intergenic     |
| 10 | 51524274  | C | T | rs2843555              | 7.37E-06 | 0.256 | 0.185 | 1.51 | 1.3  | -1.75 | 7.30E-01 | 0.214 | 0.228 | 0.93 | 0.8  | -1.07 | 1.15 | 1.38E-02 | TIMM23B                                             | intronic       |
| 7  | 78989041  | A | G | rs3                    |          |       |       |      |      |       |          |       |       |      |      |       |      |          |                                                     |                |

|    |           |   |   |              |          |       |       |      |      |       |          |       |       |      |      |       |      |          |                                                  |                |
|----|-----------|---|---|--------------|----------|-------|-------|------|------|-------|----------|-------|-------|------|------|-------|------|----------|--------------------------------------------------|----------------|
| 15 | 77520611  | C | T | rs115757025  | 2.53E-01 | 0.015 | 0.021 | 0.72 | 0.44 | -1.18 | 2.00E-05 | 0.043 | 0.023 | 1.86 | 1.37 | -2.54 | 1.48 | 1.39E-02 | PEAK1                                            | intronic       |
| 7  | 103500233 | G | C | rs12705163   | 5.05E-05 | 0.091 | 0.054 | 1.76 | 1.39 | -2.22 | 6.80E-01 | 0.072 | 0.078 | 0.92 | 0.73 | -1.15 | 1.25 | 1.41E-02 | RELN                                             | intronic       |
| 1  | 204735951 | G | A | rs77016775   | 6.32E-01 | 0.147 | 0.161 | 0.90 | 0.75 | -1.07 | 6.46E-05 | 0.191 | 0.140 | 1.44 | 1.24 | -1.68 | 1.17 | 1.41E-02 | LRRN2(dist=81354), NFASC(dist=61831)             | intergenic     |
| 2  | 204734487 | C | T | rs231779     | 4.14E-01 | 0.435 | 0.425 | 1.04 | 0.92 | -1.18 | 1.91E-05 | 0.375 | 0.434 | 0.78 | 0.69 | -0.88 | 0.89 | 1.41E-02 | CTLA4                                            | intronic       |
| 1  | 204730990 | G | T | rs75586960   | 6.25E-01 | 0.147 | 0.161 | 0.90 | 0.75 | -1.07 | 5.97E-05 | 0.191 | 0.140 | 1.44 | 1.24 | -1.68 | 1.17 | 1.41E-02 | LRRN2(dist=76393), NFASC(dist=66792)             | intergenic     |
| 1  | 204731014 | G | T | rs75103403   | 6.25E-01 | 0.147 | 0.161 | 0.90 | 0.75 | -1.06 | 5.97E-05 | 0.191 | 0.140 | 1.44 | 1.24 | -1.68 | 1.17 | 1.41E-02 | LRRN2(dist=76417), NFASC(dist=66768)             | intergenic     |
| 12 | 909318    | A | T | rs188920799  | 5.22E-05 | 0.061 | 0.039 | 1.61 | 1.21 | -2.13 | 7.90E-01 | 0.044 | 0.044 | 1.02 | 0.77 | -1.36 | 1.31 | 1.41E-02 | WNK1                                             | intronic       |
| 1  | 204720626 | C | T | rs16854306   | 6.28E-01 | 0.146 | 0.160 | 0.90 | 0.75 | -1.07 | 5.89E-05 | 0.189 | 0.139 | 1.44 | 1.24 | -1.68 | 1.17 | 1.42E-02 | LRRN2(dist=66029), NFASC(dist=77156)             | intergenic     |
| 1  | 53342954  | C | T | rs537822     | 5.85E-01 | 0.147 | 0.157 | 1.08 | 0.91 | -1.29 | 3.05E-05 | 0.186 | 0.150 | 0.77 | 0.66 | -0.9  | 0.84 | 1.43E-02 | ZYG11A                                           | intronic       |
| 12 | 917372    | A | G | rs80329747   | 5.81E-05 | 0.061 | 0.039 | 1.60 | 1.21 | -2.12 | 8.02E-01 | 0.045 | 0.044 | 1.02 | 0.77 | -1.36 | 1.31 | 1.43E-02 | WNK1                                             | intronic       |
| 12 | 918605    | C | T | rs75869732   | 5.83E-05 | 0.061 | 0.039 | 1.60 | 1.21 | -2.12 | 8.02E-01 | 0.045 | 0.044 | 1.02 | 0.77 | -1.36 | 1.31 | 1.43E-02 | WNK1                                             | intronic       |
| 9  | 36130438  | C | T | rs7033945    | 4.27E-05 | 0.072 | 0.048 | 1.55 | 1.19 | -2    | 7.75E-01 | 0.054 | 0.053 | 1.03 | 0.8  | -1.34 | 1.30 | 1.43E-02 | RECK(dist=5986), GLIPR2(dist=6095)               | intergenic     |
| 12 | 915018    | A | G | rs115861606  | 6.05E-05 | 0.061 | 0.039 | 1.60 | 1.21 | -2.12 | 8.05E-01 | 0.045 | 0.044 | 1.02 | 0.77 | -1.36 | 1.31 | 1.44E-02 | WNK1                                             | intronic       |
| 3  | 63975328  | A | G | rs73119018   | 2.22E-01 | 0.187 | 0.208 | 0.87 | 0.75 | -1.02 | 4.66E-06 | 0.236 | 0.183 | 1.38 | 1.2  | -1.59 | 1.15 | 1.44E-02 | ATXN7                                            | intronic       |
| 10 | 51518910  | G | A | rs2611504    | 2.31E-05 | 0.240 | 0.176 | 1.47 | 1.27 | -1.71 | 8.34E-01 | 0.199 | 0.210 | 0.93 | 0.81 | -1.08 | 1.17 | 1.44E-02 | TIMM23B                                          | intronic       |
| 10 | 51492713  | A | C | rs4278470    | 6.27E-05 | 0.263 | 0.198 | 1.44 | 1.24 | -1.66 | 9.45E-01 | 0.250 | 0.261 | 0.95 | 0.83 | -1.08 | 1.16 | 1.45E-02 | TIMM23B                                          | intronic       |
| 10 | 54715409  | T | C | rs7912766    | 3.20E-01 | 0.400 | 0.395 | 0.98 | 0.86 | -1.11 | 3.91E-05 | 0.333 | 0.384 | 1.25 | 1.1  | -1.41 | 1.14 | 1.45E-02 | MBL2(dist=183949), PCDH15(dist=847124)           | intergenic     |
| 10 | 8256509   | G | A | rs139133324  | 1.07E-05 | 0.050 | 0.022 | 2.34 | 1.67 | -3.28 | 7.49E-01 | 0.040 | 0.046 | 0.86 | 0.64 | -1.15 | 1.40 | 1.45E-02 | GATA3(dist=139345), LINC00708(dist=44786)        | intergenic     |
| 7  | 103500194 | T | A | rs12705162   | 5.34E-05 | 0.091 | 0.054 | 1.75 | 1.38 | -2.22 | 6.76E-01 | 0.072 | 0.079 | 0.92 | 0.73 | -1.15 | 1.24 | 1.46E-02 | RELN                                             | intronic       |
| 12 | 12254075  | C | T | rs2448032    | 3.96E-01 | 0.224 | 0.204 | 1.13 | 0.97 | -1.31 | 5.91E-05 | 0.197 | 0.258 | 0.71 | 0.61 | -0.82 | 0.86 | 1.47E-02 | BCL2L14(dist=1448), MIR1244-4(dist=10811)        | intergenic     |
| 7  | 79000456  | C | T | rs10237230   | 5.41E-01 | 0.107 | 0.115 | 0.93 | 0.76 | -1.13 | 2.20E-05 | 0.137 | 0.099 | 1.44 | 1.21 | -1.72 | 1.21 | 1.48E-02 | IMAGI2                                           | intronic       |
| 6  | 138691969 | A | C | rs11969619   | 5.91E-01 | 0.239 | 0.241 | 0.99 | 0.86 | -1.14 | 4.42E-05 | 0.191 | 0.225 | 0.81 | 0.7  | -0.94 | 0.87 | 1.48E-02 | ARFGEF3(dist=26169), HEBP2(dist=33367)           | intergenic     |
| 2  | 60129430  | C | T | rs1981912    | 4.86E-01 | 0.328 | 0.315 | 0.94 | 0.83 | -1.08 | 3.53E-05 | 0.265 | 0.328 | 1.35 | 1.18 | -1.54 | 1.13 | 1.48E-02 | LOC101927285(dist=622895), MIR4432(dist=485067)  | intergenic     |
| 3  | 63948609  | C | G | rs13433909   | 1.70E-01 | 0.198 | 0.220 | 0.87 | 0.75 | -1.02 | 2.08E-06 | 0.254 | 0.199 | 1.37 | 1.19 | -1.57 | 1.15 | 1.48E-02 | ATXN7                                            | intronic       |
| 2  | 195979631 | G | - | -            | 1.60E-05 | 0.218 | 0.176 | 1.30 | 1.12 | -1.52 | 3.45E-01 | 0.187 | 0.190 | 0.98 | 0.84 | -1.14 | 1.18 | 1.48E-02 | LOC101927431(dist=353472), SLC39A10(dist=541901) | intergenic     |
| 11 | 7810940   | T | A | rs11500778   | 5.86E-01 | 0.236 | 0.246 | 0.94 | 0.82 | -1.09 | 4.09E-05 | 0.290 | 0.248 | 1.24 | 1.09 | -1.41 | 1.18 | 1.50E-02 | OVCH2(dist=82999), OR5P2(dist=6581)              | intergenic     |
| 10 | 45124666  | A | T | rs17487774   | 1.47E-05 | 0.051 | 0.022 | 2.43 | 1.74 | -3.4  | 8.19E-01 | 0.038 | 0.042 | 0.92 | 0.68 | -1.24 | 1.38 | 1.50E-02 | CXCL12(dist=244121), TMEM72-AS1(dist=181806)     | intergenic     |
| 4  | 92549485  | G | A | rs188025797  | 4.80E-01 | 0.096 | 0.104 | 0.92 | 0.75 | -1.13 | 4.00E-05 | 0.131 | 0.091 | 1.51 | 1.26 | -1.8  | 1.21 | 1.50E-02 | CCSER1(dist=26115), LOC101929194(dist=634164)    | intergenic     |
| 14 | 88198948  | T | C | rs78134330   | 3.93E-01 | 0.086 | 0.096 | 0.88 | 0.71 | -1.1  | 2.37E-05 | 0.121 | 0.088 | 1.44 | 1.2  | -1.73 | 1.25 | 1.50E-02 | LOC283585(dist=809849), GALC(dist=200410)        | intergenic     |
| 2  | 18497448  | C | A | rs1516919    | 6.10E-01 | 0.378 | 0.375 | 1.01 | 0.89 | -1.15 | 1.79E-05 | 0.322 | 0.374 | 0.80 | 0.7  | -0.9  | 0.89 | 1.51E-02 | KCNS3(dist=383223), RDH14(dist=238541)           | intergenic     |
| 12 | 909151    | T | C | rs76311496   | 6.49E-05 | 0.060 | 0.039 | 1.60 | 1.2  | -2.12 | 8.00E-01 | 0.044 | 0.043 | 1.02 | 0.77 | -1.36 | 1.31 | 1.52E-02 | WNK1                                             | intronic       |
| 18 | 7765570   | T | A | rs11663448   | 2.60E-05 | 0.348 | 0.279 | 1.38 | 1.21 | -1.58 | 6.29E-01 | 0.311 | 0.328 | 0.93 | 0.82 | -1.05 | 1.13 | 1.52E-02 | PTPRM                                            | intronic       |
| 10 | 8254435   | C | T | rs72786323   | 1.29E-05 | 0.051 | 0.023 | 2.33 | 1.67 | -3.24 | 7.41E-01 | 0.041 | 0.047 | 0.86 | 0.64 | -1.15 | 1.38 | 1.54E-02 | GATA3(dist=137271), LINC00708(dist=46860)        | intergenic     |
| 4  | 68188653  | G | A | rs28868577   | 5.03E-01 | 0.266 | 0.275 | 0.95 | 0.83 | -1.1  | 6.24E-05 | 0.314 | 0.266 | 1.26 | 1.11 | -1.43 | 1.13 | 1.54E-02 | MIR1269A(dist=1046007), LOC101927237(dist=94370) | intergenic     |
| 7  | 103499987 | A | G | rs12705161   | 5.32E-05 | 0.090 | 0.054 | 1.75 | 1.38 | -2.22 | 6.63E-01 | 0.073 | 0.079 | 0.92 | 0.73 | -1.15 | 1.24 | 1.54E-02 | RELN                                             | intronic       |
| 2  | 195986610 | C | T | rs2566717    | 5.11E-05 | 0.322 | 0.274 | 1.26 | 1.1  | -1.44 | 5.44E-01 | 0.274 | 0.273 | 1.01 | 0.88 | -1.15 | 1.14 | 1.54E-02 | LOC101927431(dist=360451), SLC39A10(dist=534922) | intergenic     |
| 15 | 77540272  | C | T | rs115780877  | 3.30E-01 | 0.015 | 0.021 | 1.04 | 0.46 | -1.21 | 4.75E-05 | 0.043 | 0.025 | 1.79 | 1.32 | -2.43 | 1.47 | 1.55E-02 | PEAK1                                            | intronic       |
| 1  | 61806984  | A | G | rs9436206    | 4.73E-01 | 0.051 | 0.053 | 0.96 | 0.73 | -1.28 | 2.72E-05 | 0.075 | 0.052 | 1.49 | 1.18 | -1.87 | 1.31 | 1.55E-02 | NFIA                                             | intronic       |
| 7  | 62918770  | G | A | rs145247182  | 6.36E-01 | 0.056 | 0.058 | 0.95 | 0.73 | -1.24 | 1.90E-05 | 0.071 | 0.049 | 1.50 | 1.19 | -1.9  | 1.34 | 1.55E-02 | LOC100287834(dist=59351), MIR4283-2(dist=162698) | intergenic     |
| 2  | 158821921 | C | T | rs116697623  | 3.70E-01 | 0.029 | 0.028 | 1.03 | 0.71 | -1.49 | 1.91E-05 | 0.049 | 0.031 | 1.58 | 1.19 | -2.11 | 1.41 | 1.56E-02 | ACVR1(dist=89547), UPP2(dist=29770)              | intergenic     |
| 3  | 168362904 | A | G | rs11712578   | 4.82E-01 | 0.121 | 0.119 | 0.98 | 0.81 | -1.19 | 3.63E-05 | 0.169 | 0.139 | 0.79 | 0.67 | -0.93 | 0.84 | 1.56E-02 | EGFEM1P                                          | ncRNA_intronic |
| 10 | 45119285  | C | T | rs111237601  | 1.14E-05 | 0.052 | 0.022 | 2.44 | 1.75 | -3.4  | 7.76E-01 | 0.039 | 0.042 | 0.91 | 0.67 | -1.23 | 1.37 | 1.57E-02 | CXCL12(dist=238740), TMEM72-AS1(dist=187187)     | intergenic     |
| 10 | 51530757  | G | A | rs10826127   | 5.89E-06 | 0.255 | 0.184 | 1.52 | 1.31 | -1.76 | 6.54E-01 | 0.214 | 0.229 | 0.92 | 0.8  | -1.06 | 1.15 | 1.57E-02 | TIMM23B                                          | intronic       |
| 8  | 98897142  | A | G | rs10955135   | 2.28E-05 | 0.337 | 0.287 | 0.79 | 0.69 | -0.91 | 5.13E-01 | 0.282 | 0.280 | 0.99 | 0.87 | -1.13 | 0.88 | 1.58E-02 | MATN2                                            | intronic       |
| 8  | 98897852  | T | C | rs4236846    | 2.23E-05 | 0.337 | 0.287 | 0.79 | 0.69 | -0.91 | 5.08E-01 | 0.282 | 0.280 | 0.99 | 0.87 | -1.13 | 0.88 | 1.59E-02 | MATN2                                            | intronic       |
| 8  | 11012261  | T | C | rs28743023   | 4.89E-01 | 0.226 | 0.246 | 0.89 | 0.77 | -1.03 | 2.88E-05 | 0.256 | 0.199 | 1.39 | 1.21 | -1.59 | 1.14 | 1.59E-02 | XKR6                                             | intronic       |
| 18 | 27078245  | C | T | rs1188385610 | 7.58E-01 | 0.031 | 0.034 | 0.91 | 0.64 | -1.3  | 5.93E-05 | 0.042 | 0.024 | 1.75 | 1.28 | -2.38 | 1.43 | 1.60E-02 | CDH2(dist=1320800), MIR302F(dist=800631)         | intergenic     |
| 11 | 8620053   | A | C | rs117307454  | 3.59E-01 | 0.031 | 0.036 | 0.85 | 0.6  | -1.21 | 2.37E-05 | 0.061 | 0.038 | 1.65 | 1.27 | -2.13 | 1.35 | 1.60E-02 | STK33(dist=4217), TRIM66(dist=13531)             | intergenic     |
| 8  | 5385594   | C | T | rs28406137   | 1.08E-05 | 0.018 | 0.047 | 0.38 | 0.25 | -0.58 | 3.02E-01 | 0.036 | 0.029 | 1.24 | 0.9  | -1.71 | 0.73 | 1.61E-02 | CSMD1(dist=533266), LOC100287015(dist=875483)    | intergenic     |
| 8  | 5384957   | A | C | rs28512288   | 1.10E-05 | 0.018 | 0.047 | 0.38 | 0.25 | -0.58 | 3.03E-01 | 0.036 | 0.029 | 1.24 | 0.9  | -1.71 | 0.73 | 1.62E-02 | CSMD1(dist=532629), LOC100287015(dist=876120)    | intergenic     |
| 7  | 103490228 | A | C | rs13233546   | 6.37E-05 | 0.081 | 0.046 | 1.80 | 1.4  | -2.32 | 7.48E-01 | 0.064 | 0.069 | 0.92 | 0.72 | -1.16 | 1.25 | 1.62E-02 | RELN                                             | intronic       |
| 8  | 5971072   | G | A | rs146054152  | 5.37E-01 | 0.134 | 0.147 | 0.90 | 0.75 | -1.08 | 4.41E-05 | 0.158 | 0.121 | 1.36 | 1.16 | -1.61 | 1.22 | 1.62E-02 | CSMD1(dist=118744), LOC100287015(dist=290005)    | intergenic     |
| 8  | 98898400  | T | C | rs4319057    | 2.28E-05 | 0.337 | 0.287 | 0.79 | 0.69 | -0.91 | 5.03E-01 | 0.282 | 0.280 | 0.99 | 0.87 | -1.13 | 0.89 | 1.63E-02 | MATN2                                            | intronic       |
| 10 | 44509716  | C | A | rs11238809   | 5.95E-05 | 0.043 | 0.020 | 2.17 | 1.53 | -3.1  | 9.26E-01 | 0.037 | 0.039 | 0.95 | 0.7  | -1.29 | 1.40 | 1.63E-02 | LINC00841(dist=44361), C10orf142(dist=278482)    | intergenic     |
| 9  | 800984    | A | G | rs7019976    | 1.42E-02 | 0.038 | 0.030 | 1.28 | 0.91 | -1.79 | 5.38E-06 | 0.043 | 0.026 | 1.69 | 1.24 | -2.29 | 1.83 | 1.63E-02 | KANK1(dist=54878), DMRT1(dist=40706)             | intergenic     |
| 5  | 3350440   | G | A | rs115134278  | 6.28E-01 | 0.048 | 0.052 | 0.91 | 0.68 | -1.22 | 1.72E-05 | 0.067 | 0.042 | 1.63 | 1.28 | -2.09 | 1.33 | 1.63E-02 | LINC01377(dist=169094), LINC01019(dist=66826)    | intergenic     |
| 11 | 7855047   | C | T | rs2048430    | 3.87E-01 | 0.436 | 0.408 | 1.12 | 0.99 | -1.27 | 1.68E-05 | 0.365 | 0.437 | 0.74 | 0.65 | -0.83 | 0.89 | 1.64E-02 | OR                                               |                |

|    |           |   |   |                        |          |       |       |                  |          |       |       |                  |               |                                                     |                |
|----|-----------|---|---|------------------------|----------|-------|-------|------------------|----------|-------|-------|------------------|---------------|-----------------------------------------------------|----------------|
| 2  | 158879206 | C | T | rs34727822             | 5.20E-01 | 0.027 | 0.025 | 1.07 0.73 - 1.59 | 6.13E-05 | 0.044 | 0.028 | 1.60 1.19 - 2.16 | 1.41 1.68E-02 | U2PP2                                               | intronic       |
| 7  | 113522662 | T | C | rs35436835             | 5.14E-01 | 0.306 | 0.316 | 0.96 0.84 - 1.09 | 5.60E-05 | 0.345 | 0.292 | 1.28 1.13 - 1.45 | 1.13 1.68E-02 | PPP1R3A                                             | intronic       |
| 10 | 51489186  | G | C | rs2843567              | 5.69E-05 | 0.291 | 0.232 | 1.36 1.18 - 1.56 | 8.83E-01 | 0.284 | 0.294 | 0.95 0.84 - 1.08 | 1.18 1.69E-02 | TM6SF2                                              | intronic       |
| 14 | 95946080  | C | T | rs74080285             | 4.65E-05 | 0.331 | 0.284 | 1.24 1.09 - 1.42 | 5.98E-01 | 0.279 | 0.273 | 1.03 0.9 - 1.17  | 1.13 1.69E-02 | SYNE3(dist=3907), SNHG10(dist=53169)                | intergenic     |
| 2  | 196866420 | C | T | rs6434811              | 3.47E-01 | 0.343 | 0.297 | 1.23 1.08 - 1.41 | 2.11E-05 | 0.302 | 0.384 | 0.69 0.61 - 0.79 | 0.88 1.70E-02 | DNAH7                                               | exonic         |
| 3  | 63974258  | T | G | rs3774725              | 2.13E-01 | 0.215 | 0.237 | 0.88 0.76 - 1.02 | 7.35E-06 | 0.272 | 0.217 | 1.35 1.18 - 1.54 | 1.14 1.70E-02 | ATXN7                                               | intronic       |
| 14 | 95946476  | C | A | rs73341000             | 4.19E-05 | 0.272 | 0.234 | 1.23 1.06 - 1.41 | 5.99E-01 | 0.233 | 0.227 | 1.04 0.9 - 1.19  | 1.15 1.71E-02 | SYNE3(dist=4303), SNHG10(dist=52773)                | intergenic     |
| 7  | 113524668 | T | C | rs59437547             | 5.09E-01 | 0.306 | 0.315 | 0.95 0.84 - 1.09 | 5.59E-05 | 0.345 | 0.292 | 1.28 1.13 - 1.45 | 1.13 1.71E-02 | PPP1R3A                                             | intronic       |
| 9  | 20150664  | C | T | rs7042574              | 6.34E-05 | 0.197 | 0.159 | 1.29 1.1 - 1.52  | 6.24E-01 | 0.163 | 0.160 | 1.03 0.88 - 1.2  | 1.17 1.71E-02 | SLC24A2(dist=363647), MLLT3(dist=190999)            | intergenic     |
| 11 | 8546365   | A | C | rs7119274              | 4.21E-01 | 0.285 | 0.307 | 0.90 0.79 - 1.03 | 2.57E-05 | 0.322 | 0.264 | 1.32 1.17 - 1.5  | 1.13 1.71E-02 | STK33                                               | intronic       |
| 8  | 98900888  | A | G | rs7835518              | 2.58E-05 | 0.336 | 0.288 | 0.80 0.7 - 0.91  | 5.07E-01 | 0.281 | 0.279 | 0.99 0.87 - 1.13 | 0.89 1.71E-02 | MATN2                                               | intronic       |
| 3  | 143536665 | T | C | rs6762196              | 2.87E-05 | 0.126 | 0.177 | 0.67 0.56 - 0.81 | 3.12E-01 | 0.151 | 0.139 | 1.10 0.93 - 1.3  | 0.85 1.72E-02 | SLC9A9                                              | intronic       |
| 3  | 143536593 | T | C | rs10513218             | 2.88E-05 | 0.126 | 0.177 | 0.67 0.56 - 0.81 | 3.12E-01 | 0.151 | 0.139 | 1.10 0.93 - 1.3  | 0.85 1.72E-02 | SLC9A9                                              | intronic       |
| 3  | 30120961  | T | A | rs149260504            | 3.33E-01 | 0.023 | 0.029 | 0.77 0.51 - 1.15 | 3.37E-05 | 0.047 | 0.026 | 1.87 1.39 - 2.52 | 1.39 1.72E-02 | RBMS3(dist=69075), TGFBR2(dist=527033)              | intergenic     |
| 3  | 28263431  | T | A | rs7614914              | 5.77E-05 | 0.347 | 0.430 | 0.70 0.62 - 0.8  | 5.44E-01 | 0.393 | 0.370 | 1.10 0.98 - 1.24 | 0.89 1.72E-02 | EOMES(dist=499225), CMC1(dist=19693)                | intergenic     |
| 3  | 63940509  | C | T | rs9820538              | 1.23E-01 | 0.188 | 0.213 | 0.85 0.73 - 1    | 9.54E-07 | 0.234 | 0.179 | 1.40 1.21 - 1.61 | 1.15 1.72E-02 | ATXN7                                               | intronic       |
| 10 | 131135837 | C | T | rs7903583              | 1.97E-01 | 0.193 | 0.202 | 0.95 0.81 - 1.11 | 2.67E-05 | 0.267 | 0.230 | 1.22 1.07 - 1.4  | 1.17 1.73E-02 | LINC01163(dist=1019847), MGMT(dist=129617)          | intergenic     |
| 3  | 30122653  | T | C | rs116482232            | 3.74E-01 | 0.023 | 0.030 | 0.79 0.53 - 1.17 | 5.52E-05 | 0.047 | 0.026 | 1.83 1.36 - 2.46 | 1.39 1.74E-02 | RBMS3(dist=70767), TGFBR2(dist=525341)              | intergenic     |
| 4  | 35978247  | C | T | rs1655035              | 1.17E-05 | 0.173 | 0.124 | 0.68 0.57 - 0.8  | 4.55E-01 | 0.148 | 0.166 | 1.15 0.97 - 1.35 | 0.86 1.74E-02 | LOC101928622(dist=1936732), ARAP2(dist=89373)       | intergenic     |
| 3  | 191945739 | T | C | rs76213903             | 5.12E-01 | 0.023 | 0.028 | 0.84 0.57 - 1.26 | 1.15E-05 | 0.038 | 0.020 | 1.91 1.37 - 2.65 | 1.45 1.74E-02 | FGF12                                               | intronic       |
| 3  | 191963699 | T | C | rs112723257            | 5.10E-01 | 0.024 | 0.028 | 0.85 0.57 - 1.26 | 1.11E-05 | 0.038 | 0.020 | 1.91 1.37 - 2.66 | 1.45 1.75E-02 | FGF12-AS1                                           | ncRNA_intronic |
| 16 | 84857697  | G | C | rs77396287             | 7.27E-01 | 0.045 | 0.050 | 0.89 0.67 - 1.2  | 6.07E-05 | 0.057 | 0.036 | 1.60 1.23 - 2.09 | 1.36 1.76E-02 | CRISPLD2                                            | intronic       |
| 5  | 125010214 | T | C | rs73318103             | 3.32E-05 | 0.063 | 0.040 | 1.62 1.23 - 2.14 | 3.11E-01 | 0.036 | 0.039 | 0.93 0.68 - 1.27 | 1.34 1.77E-02 | LOC101927460(dist=72294), LOC102546228(dist=505056) | intergenic     |
| 3  | 168368215 | C | A | rs4473601              | 5.00E-01 | 0.118 | 0.115 | 0.97 0.8 - 1.17  | 5.63E-05 | 0.161 | 0.132 | 0.79 0.67 - 0.93 | 0.84 1.78E-02 | EGFEM1P                                             | ncRNA_intronic |
| 1  | 31139204  | C | T | rs10914181             | 1.35E-01 | 0.065 | 0.069 | 0.94 0.73 - 1.21 | 5.76E-06 | 0.124 | 0.099 | 1.29 1.08 - 1.55 | 1.24 1.78E-02 | LOC101929406(dist=628745), MATN1(dist=44920)        | intergenic     |
| 6  | 22492062  | C | A | rs193289480            | 6.32E-01 | 0.026 | 0.028 | 0.92 0.63 - 1.35 | 2.60E-05 | 0.038 | 0.021 | 1.83 1.32 - 2.53 | 1.47 1.78E-02 | PRL(dist=188980), HDGFL1(dist=77616)                | intergenic     |
| 7  | 62941377  | G | A | rs114322983            | 6.88E-01 | 0.049 | 0.052 | 0.95 0.72 - 1.27 | 3.24E-05 | 0.066 | 0.045 | 1.48 1.16 - 1.9  | 1.36 1.78E-02 | LOC100287834(dist=81958), MIR4283-2(dist=140091)    | intergenic     |
| 3  | 124870443 | C | T | rs73191256             | 3.22E-01 | 0.261 | 0.250 | 1.06 0.92 - 1.22 | 1.53E-05 | 0.209 | 0.255 | 0.77 0.67 - 0.89 | 0.87 1.79E-02 | SLC12A8                                             | intronic       |
| 10 | 45111378  | T | A | rs75761026;rs199952666 | 1.35E-05 | 0.052 | 0.020 | 2.43 1.74 - 3.39 | 7.46E-01 | 0.039 | 0.042 | 0.91 0.67 - 1.22 | 1.36 1.81E-02 | CXCL12(dist=230833), TMEM72-AS1(dist=195094)        | intergenic     |
| 3  | 168366608 | T | C | rs9813539              | 5.00E-01 | 0.118 | 0.115 | 0.97 0.8 - 1.17  | 5.91E-05 | 0.160 | 0.130 | 0.79 0.67 - 0.93 | 0.84 1.81E-02 | EGFEM1P                                             | ncRNA_intronic |
| 1  | 113628552 | G | T | rs12069411             | 4.88E-01 | 0.058 | 0.064 | 0.90 0.7 - 1.17  | 3.21E-05 | 0.084 | 0.053 | 1.64 1.32 - 2.05 | 1.26 1.81E-02 | LRIG2                                               | intronic       |
| 12 | 961251    | C | T | rs72648653             | 5.45E-05 | 0.062 | 0.039 | 1.60 1.21 - 2.12 | 7.04E-01 | 0.046 | 0.046 | 1.00 0.76 - 1.33 | 1.30 1.81E-02 | WNK1                                                | intronic       |
| 3  | 15562246  | A | G | rs4685251              | 1.99E-01 | 0.371 | 0.378 | 1.03 0.91 - 1.17 | 5.17E-06 | 0.427 | 0.376 | 0.81 0.72 - 0.91 | 0.89 1.81E-02 | COLQ                                                | intronic       |
| 12 | 961703    | G | C | rs80235381             | 5.47E-05 | 0.062 | 0.039 | 1.60 1.21 - 2.12 | 7.03E-01 | 0.046 | 0.046 | 1.00 0.76 - 1.33 | 1.29 1.81E-02 | WNK1                                                | intronic       |
| 12 | 961595    | C | A | rs72648659             | 5.46E-05 | 0.062 | 0.039 | 1.60 1.21 - 2.12 | 7.03E-01 | 0.046 | 0.046 | 1.00 0.76 - 1.33 | 1.29 1.81E-02 | WNK1                                                | intronic       |
| 12 | 964025    | C | T | rs116028079            | 5.65E-05 | 0.062 | 0.040 | 1.61 1.22 - 2.12 | 6.95E-01 | 0.046 | 0.046 | 1.00 0.76 - 1.32 | 1.29 1.81E-02 | WNK1                                                | intronic       |
| 10 | 8248745   | A | T | rs72786315             | 1.63E-05 | 0.054 | 0.025 | 2.23 1.62 - 3.07 | 7.62E-01 | 0.043 | 0.050 | 0.86 0.64 - 1.14 | 1.36 1.82E-02 | GATA3(dist=131581), LINC00708(dist=52550)           | intergenic     |
| 11 | 8551916   | G | T | rs7105027              | 4.27E-01 | 0.286 | 0.308 | 0.90 0.79 - 1.03 | 3.11E-05 | 0.322 | 0.265 | 1.32 1.16 - 1.5  | 1.13 1.82E-02 | STK33                                               | intronic       |
| 12 | 953134    | C | T | rs77092791             | 5.47E-05 | 0.062 | 0.039 | 1.60 1.21 - 2.12 | 7.06E-01 | 0.046 | 0.046 | 1.00 0.76 - 1.33 | 1.30 1.82E-02 | WNK1                                                | intronic       |
| 12 | 947138    | G | A | rs79755548             | 5.47E-05 | 0.062 | 0.039 | 1.60 1.21 - 2.12 | 7.07E-01 | 0.046 | 0.046 | 1.00 0.76 - 1.33 | 1.30 1.82E-02 | WNK1                                                | intronic       |
| 1  | 56948424  | T | C | rs10888974             | 1.66E-05 | 0.313 | 0.379 | 0.75 0.65 - 0.85 | 3.02E-01 | 0.366 | 0.351 | 1.07 0.95 - 1.21 | 0.89 1.82E-02 | MIR4422(dist=1257028), PPAP2B(dist=11995)           | intergenic     |
| 12 | 968536    | T | C | rs34728563             | 5.97E-05 | 0.063 | 0.040 | 1.61 1.22 - 2.12 | 6.88E-01 | 0.046 | 0.046 | 1.00 0.76 - 1.32 | 1.29 1.82E-02 | WNK1                                                | exonic         |
| 12 | 968522    | A | G | rs56325964             | 5.97E-05 | 0.063 | 0.040 | 1.61 1.22 - 2.12 | 6.87E-01 | 0.046 | 0.046 | 1.00 0.76 - 1.32 | 1.29 1.82E-02 | WNK1                                                | exonic         |
| 10 | 32368709  | C | T | rs56834753             | 3.56E-05 | 0.137 | 0.194 | 0.66 0.55 - 0.78 | 8.08E-01 | 0.185 | 0.177 | 1.05 0.9 - 1.22  | 0.86 1.83E-02 | KIF5B(dist=23338), EPC1(dist=187935)                | intergenic     |
| 13 | 106142235 | C | T | rs778294               | 3.18E-01 | 0.217 | 0.229 | 0.93 0.8 - 1.08  | 1.30E-05 | 0.268 | 0.223 | 1.28 1.12 - 1.46 | 1.14 1.84E-02 | DAOA                                                | exonic         |
| 14 | 105078251 | C | T | rs4340263              | 2.24E-01 | 0.143 | 0.156 | 1.11 0.93 - 1.32 | 5.08E-06 | 0.192 | 0.144 | 0.71 0.61 - 0.82 | 0.86 1.84E-02 | TMEM179(dist=7154), MIR4710(dist=65780)             | intergenic     |
| 11 | 7858223   | G | A | rs10839885             | 3.39E-01 | 0.413 | 0.384 | 1.13 1 - 1.28    | 1.20E-05 | 0.346 | 0.421 | 0.73 0.65 - 0.82 | 0.90 1.85E-02 | OR5P3(dist=10704), OR5E1P(dist=12375)               | intergenic     |
| 10 | 32392248  | G | A | rs11008766             | 5.76E-05 | 0.111 | 0.162 | 0.65 0.53 - 0.78 | 8.92E-01 | 0.151 | 0.146 | 1.04 0.89 - 1.23 | 0.85 1.85E-02 | KIF5B(dist=46877), EPC1(dist=164396)                | intergenic     |
| 11 | 8548811   | T | C | rs11041960             | 3.97E-01 | 0.283 | 0.305 | 0.90 0.78 - 1.03 | 2.85E-05 | 0.322 | 0.264 | 1.32 1.17 - 1.5  | 1.13 1.86E-02 | STK33                                               | intronic       |
| 1  | 113630151 | T | A | rs12068534             | 4.80E-01 | 0.058 | 0.064 | 0.90 0.69 - 1.17 | 3.32E-05 | 0.084 | 0.053 | 1.64 1.32 - 2.05 | 1.26 1.87E-02 | LRIG2                                               | intronic       |
| 11 | 7855906   | G | C | rs1384509              | 5.64E-01 | 0.431 | 0.409 | 1.10 0.97 - 1.24 | 6.19E-05 | 0.367 | 0.436 | 0.75 0.67 - 0.85 | 0.90 1.88E-02 | OR5P3(dist=8387), OR5E1P(dist=14692)                | intergenic     |
| 9  | 21359818  | C | A | rs140373339            | 2.00E-06 | 0.055 | 0.035 | 1.63 1.21 - 2.18 | 1.83E-02 | 0.033 | 0.048 | 0.68 0.49 - 0.93 | 0.64 1.88E-02 | IFNA6(dist=8932), IFNA13(dist=7553)                 | intergenic     |
| 2  | 58640888  | A | G | rs6741076              | 2.13E-05 | 0.225 | 0.274 | 1.30 1.12 - 1.5  | 4.39E-01 | 0.291 | 0.292 | 1.01 0.88 - 1.14 | 1.13 1.89E-02 | FANCL(dist=172373), LINC01122(dist=107000)          | intergenic     |
| 10 | 32396993  | C | T | rs12267125             | 6.43E-05 | 0.111 | 0.162 | 0.65 0.54 - 0.78 | 9.05E-01 | 0.151 | 0.146 | 1.04 0.88 - 1.23 | 0.85 1.89E-02 | KIF5B(dist=51622), EPC1(dist=159651)                | intergenic     |
| 11 | 8701888   | G | A | rs12363135             | 4.68E-01 | 0.046 | 0.050 | 0.91 0.68 - 1.22 | 4.10E-05 | 0.065 | 0.043 | 1.54 1.2 - 1.97  | 1.33 1.90E-02 | TRIM66(dist=21505), RPL27A(dist=2107)               | intergenic     |
| 19 | 12366192  | A | T | rs73004246             | 4.14E-05 | 0.283 | 0.236 | 1.28 1.12 - 1.48 | 4.78E-01 | 0.238 | 0.241 | 0.99 0.86 - 1.13 | 1.14 1.90E-02 | LOC100289333(dist=47801), ZNF44(dist=16433)         | intergenic     |
| 12 | 50331932  | T | C | rs115877344            | 7.96E-01 | 0.040 | 0.043 | 0.93 0.68 - 1.27 | 3.81E-05 | 0.045 | 0.029 | 1.59 1.18 - 2.13 | 1.46 1.90E-02 | LOC101927292(dist=11810), AQP2(dist=12592)          | intergenic     |
| 4  | 68207078  | T | C | rs1946919              | 3.70E-01 | 0.231 | 0.242 | 0.94 0.81 - 1.09 | 3.93E-05 | 0.273 | 0.228 | 1.28 1.12 - 1.46 | 1.13 1.91E-02 | MIR1269A(dist=1064432), LOC101927237(dist=75945)    | intergenic     |
| 7  | 113531598 | A | G | rs73716342             | 4.64E-01 | 0.304 | 0.315 | 0.95 0.83 - 1.09 | 5.15E-05 | 0.344 | 0.291 | 1.28 1.13 - 1.45 | 1.12 1.92E-02 | PPP1R3A                                             | intronic       |
| 7  | 113515745 | T | C | rs2974941              | 4.73E-01 | 0.302 | 0.313 | 0.95 0.83 - 1.09 | 5.86E-05 | 0.345 | 0.292 | 1.28 1.13 - 1.45 | 1.12 1.92E-02 | LINC00998(dist=757108), PPP1R3A(dist=1137)          | intergenic     |
| 7  | 113513612 | C | A | rs2974946              | 4.66E-01 | 0.302 | 0.313 | 0.95 0.83 - 1.09 | 5.39E-05 | 0.349 | 0.295 | 1.28 1.13 - 1.45 | 1.12 1.92E-02 | LINC00998(dist=754975), PPP1R3A(dist=3270)          | intergenic     |
| 5  | 125007541 | G | C | rs733161199            | 2.90E-05 | 0.062 | 0.039 | 1.62 1.23 - 2.15 | 3.06E-01 | 0.036 | 0.039 | 0.92 0.68 - 1.26 | 1.34 1.93E-02 | LOC101927460(dist=69621), LOC102546228(dist=507729) | intergenic     |
| 4  | 80212792  | C | T | rs1125                 |          |       |       |                  |          |       |       |                  |               |                                                     |                |

|    |           |   |   |                       |          |       |       |      |      |       |          |       |       |      |      |       |      |          |                                                     |                |
|----|-----------|---|---|-----------------------|----------|-------|-------|------|------|-------|----------|-------|-------|------|------|-------|------|----------|-----------------------------------------------------|----------------|
| 10 | 55413116  | T | C | rs9416295             | 6.39E-05 | 0.139 | 0.091 | 1.62 | 1.34 | -1.96 | 8.57E-01 | 0.114 | 0.122 | 0.92 | 0.77 | -1.11 | 1.21 | 1.95E-02 | MBL2(dist=881656), PCDH15(dist=149417)              | intergenic     |
| 11 | 18609134  | G | A | rs11024726            | 2.67E-01 | 0.027 | 0.029 | 0.93 | 0.64 | -1.37 | 2.03E-05 | 0.053 | 0.036 | 1.47 | 1.12 | -1.93 | 1.38 | 1.96E-02 | UEVLD                                               | intronic       |
| 3  | 102987771 | C | T | rs1565677             | 1.28E-06 | 0.449 | 0.370 | 0.72 | 0.64 | -0.82 | 1.45E-01 | 0.388 | 0.412 | 1.11 | 0.98 | -1.25 | 0.90 | 1.97E-02 | ZPLD1(dist=789086), MIR548AB(dist=255106)           | intergenic     |
| 7  | 113516616 | T | C | rs2968845             | 4.71E-01 | 0.302 | 0.313 | 1.05 | 0.92 | -1.2  | 6.19E-05 | 0.344 | 0.291 | 0.78 | 0.69 | -0.88 | 0.89 | 1.97E-02 | PPP1R3A                                             | downstream     |
| 3  | 63948566  | T | C | rs13434089            | 1.64E-01 | 0.188 | 0.211 | 0.86 | 0.74 | -1.01 | 4.26E-06 | 0.241 | 0.188 | 1.38 | 1.2  | -1.58 | 1.14 | 1.97E-02 | ATXN7                                               | intronic       |
| 18 | 4863799   | G | C | rs8085811             | 3.89E-01 | 0.115 | 0.127 | 0.89 | 0.74 | -1.08 | 9.90E-06 | 0.153 | 0.112 | 1.42 | 1.2  | -1.68 | 1.19 | 1.98E-02 | DLGAP1(dist=408533), C18orf42(dist=279873)          | intergenic     |
| 12 | 27820498  | C | T | rs11049087            | 6.67E-01 | 0.051 | 0.050 | 1.00 | 0.75 | -1.33 | 2.92E-05 | 0.065 | 0.049 | 1.36 | 1.06 | -1.73 | 1.34 | 1.99E-02 | PPF1BP1                                             | intronic       |
| 16 | 88050653  | T | C | rs6540149             | 3.93E-05 | 0.442 | 0.359 | 1.42 | 1.25 | -1.61 | 5.81E-01 | 0.516 | 0.482 | 0.87 | 0.77 | -0.98 | 1.12 | 1.99E-02 | BANP                                                | intronic       |
| 5  | 125006803 | C | A | rs78027030            | 3.00E-05 | 0.062 | 0.039 | 1.62 | 1.23 | -2.15 | 3.00E-01 | 0.036 | 0.039 | 0.92 | 0.68 | -1.26 | 1.34 | 1.99E-02 | LOC101927460(dist=68883), LOC102546228(dist=508467) | intergenic     |
| 5  | 125006802 | C | G | rs80345773            | 3.00E-05 | 0.062 | 0.039 | 1.62 | 1.23 | -2.15 | 3.00E-01 | 0.036 | 0.039 | 0.92 | 0.68 | -1.26 | 1.34 | 2.00E-02 | LOC101927460(dist=68882), LOC102546228(dist=508468) | intergenic     |
| 3  | 63845411  | C | T | rs9848808             | 5.76E-01 | 0.047 | 0.052 | 0.90 | 0.67 | -1.2  | 6.39E-05 | 0.074 | 0.050 | 1.50 | 1.19 | -1.89 | 1.29 | 2.02E-02 | THOC7                                               | intronic       |
| 3  | 63947565  | A | G | rs73117082            | 1.63E-01 | 0.188 | 0.212 | 0.86 | 0.74 | -1.01 | 4.48E-06 | 0.241 | 0.187 | 1.38 | 1.2  | -1.58 | 1.14 | 2.03E-02 | ATXN7                                               | intronic       |
| 3  | 191961313 | C | T | rs112140525           | 5.61E-01 | 0.025 | 0.029 | 0.86 | 0.58 | -1.27 | 2.92E-05 | 0.038 | 0.021 | 1.84 | 1.33 | -2.56 | 1.43 | 2.04E-02 | FGF12-AS1                                           | ncRNA_intronic |
| 2  | 57698355  | T | C | rs80155642            | 7.03E-01 | 0.028 | 0.028 | 1.00 | 0.68 | -1.46 | 5.84E-05 | 0.040 | 0.026 | 1.58 | 1.15 | -2.16 | 1.43 | 2.05E-02 | CCDC85A(dist=1085046), VRK2(dist=436431)            | intergenic     |
| 10 | 54697447  | G | T | rs10824840            | 4.53E-05 | 0.229 | 0.172 | 1.43 | 1.23 | -1.67 | 7.98E-01 | 0.232 | 0.240 | 0.96 | 0.83 | -1.1  | 1.18 | 2.05E-02 | MBL2(dist=165987), PCDH15(dist=865086)              | intergenic     |
| 14 | 95945809  | A | T | rs10145061            | 6.41E-05 | 0.328 | 0.283 | 1.23 | 1.08 | -1.41 | 5.72E-01 | 0.275 | 0.270 | 1.03 | 0.9  | -1.17 | 1.12 | 2.05E-02 | SYNE3(dist=3636), SNHG10(dist=53440)                | intergenic     |
| 18 | 4863506   | C | T | rs73942629            | 3.88E-01 | 0.114 | 0.127 | 0.89 | 0.74 | -1.08 | 1.10E-05 | 0.152 | 0.112 | 1.42 | 1.2  | -1.68 | 1.19 | 2.06E-02 | DLGAP1(dist=408240), C18orf42(dist=280166)          | intergenic     |
| 18 | 4863586   | T | C | rs73942630            | 3.88E-01 | 0.114 | 0.127 | 0.89 | 0.74 | -1.08 | 1.10E-05 | 0.152 | 0.112 | 1.42 | 1.2  | -1.68 | 1.19 | 2.06E-02 | DLGAP1(dist=408320), C18orf42(dist=280086)          | intergenic     |
| 1  | 228397599 | A | G | rs111238500           | 3.46E-05 | 0.064 | 0.041 | 1.61 | 1.22 | -2.12 | 3.18E-01 | 0.036 | 0.039 | 0.91 | 0.67 | -1.24 | 1.31 | 2.07E-02 | C1orf145                                            | ncRNA_intronic |
| 10 | 30781570  | C | T | rs638750              | 4.30E-05 | 0.353 | 0.274 | 1.45 | 1.27 | -1.65 | 7.05E-01 | 0.346 | 0.367 | 0.91 | 0.81 | -1.03 | 1.14 | 2.07E-02 | MAP3K8(dist=30808), LYZL2(dist=119138)              | intergenic     |
| 11 | 8537411   | G | A | rs2311390             | 3.95E-01 | 0.282 | 0.304 | 0.90 | 0.78 | -1.03 | 3.01E-05 | 0.319 | 0.262 | 1.32 | 1.16 | -1.5  | 1.12 | 2.08E-02 | STK33                                               | intronic       |
| 3  | 168353911 | A | G | rs9822406             | 4.40E-01 | 0.125 | 0.124 | 0.99 | 0.82 | -1.19 | 3.69E-05 | 0.165 | 0.135 | 0.79 | 0.67 | -0.93 | 0.85 | 2.09E-02 | EGFEM1P                                             | ncRNA_intronic |
| 7  | 113520262 | C | T | rs11973095            | 4.58E-01 | 0.302 | 0.313 | 0.95 | 0.83 | -1.09 | 6.39E-05 | 0.344 | 0.291 | 1.28 | 1.13 | -1.45 | 1.12 | 2.09E-02 | PPP1R3A                                             | intronic       |
| 7  | 108837388 | C | G | rs12705547            | 4.96E-05 | 0.169 | 0.129 | 0.73 | 0.61 | -0.86 | 4.39E-01 | 0.152 | 0.158 | 1.05 | 0.89 | -1.24 | 0.85 | 2.09E-02 | C7orf66(dist=312744), EIF3IP1(dist=761896)          | intergenic     |
| 8  | 89280293  | C | T | rs11993260            | 3.45E-01 | 0.127 | 0.124 | 1.02 | 0.85 | -1.23 | 2.82E-05 | 0.089 | 0.120 | 0.71 | 0.58 | -0.87 | 0.84 | 2.10E-02 | MMP16                                               | intronic       |
| 1  | 52318896  | A | T | rs7535118             | 3.31E-05 | 0.524 | 0.459 | 1.30 | 1.15 | -1.47 | 4.17E-01 | 0.468 | 0.480 | 0.95 | 0.85 | -1.07 | 1.12 | 2.11E-02 | NRD1                                                | intronic       |
| 3  | 168364224 | A | G | rs4955612             | 4.53E-01 | 0.119 | 0.117 | 0.98 | 0.81 | -1.19 | 5.49E-05 | 0.160 | 0.131 | 0.79 | 0.67 | -0.93 | 0.85 | 2.12E-02 | EGFEM1P                                             | ncRNA_intronic |
| 10 | 45137400  | T | C | rs11598178            | 2.62E-05 | 0.048 | 0.020 | 2.48 | 1.75 | -3.5  | 7.85E-01 | 0.038 | 0.042 | 0.91 | 0.67 | -1.23 | 1.36 | 2.13E-02 | CXCL12(dist=256855), TMEM72-AS1(dist=169072)        | intergenic     |
| 11 | 121112930 | T | G | rs77841459            | 4.62E-01 | 0.182 | 0.184 | 0.99 | 0.84 | -1.16 | 2.33E-05 | 0.123 | 0.153 | 0.78 | 0.65 | -0.93 | 0.85 | 2.13E-02 | TECTA(dist=51415), SC5D(dist=50458)                 | intergenic     |
| 3  | 168357880 | A | G | rs78815182            | 2.39E-01 | 0.164 | 0.170 | 1.04 | 0.88 | -1.23 | 5.89E-06 | 0.215 | 0.180 | 0.80 | 0.69 | -0.93 | 0.85 | 2.14E-02 | EGFEM1P                                             | ncRNA_intronic |
| 3  | 109043846 | G | A | rs144630234           | 3.10E-01 | 0.036 | 0.044 | 0.81 | 0.59 | -1.12 | 8.98E-06 | 0.058 | 0.035 | 1.67 | 1.28 | -2.18 | 1.34 | 2.14E-02 | DPPA2(dist=8482), DPPA4(dist=1142)                  | intergenic     |
| 6  | 138685826 | T | A | rs59509954            | 4.74E-01 | 0.228 | 0.229 | 1.00 | 0.86 | -1.16 | 4.89E-05 | 0.177 | 0.211 | 0.80 | 0.69 | -0.94 | 0.88 | 2.14E-02 | ARFGEF3(dist=20026), HEBP2(dist=39510)              | intergenic     |
| 6  | 4995739   | C | T | rs59365793            | 4.44E-05 | 0.046 | 0.024 | 1.98 | 1.42 | -2.77 | 5.06E-01 | 0.031 | 0.033 | 0.93 | 0.66 | -1.3  | 1.36 | 2.15E-02 | RPP40                                               | intronic       |
| 10 | 51489215  | C | T | rs2611493             | 1.62E-05 | 0.276 | 0.211 | 1.42 | 1.23 | -1.64 | 6.38E-01 | 0.269 | 0.284 | 0.93 | 0.81 | -1.06 | 1.16 | 2.15E-02 | TIMM23B                                             | intronic       |
| 1  | 198334066 | T | G | rs76504062            | 4.22E-05 | 0.041 | 0.023 | 1.84 | 1.29 | -2.61 | 5.73E-01 | 0.030 | 0.031 | 0.98 | 0.69 | -1.37 | 1.38 | 2.16E-02 | NEK7(dist=42518), ATP6V1G3(dist=158286)             | intergenic     |
| 11 | 8535922   | G | A | rs1992756             | 3.97E-01 | 0.282 | 0.304 | 0.90 | 0.78 | -1.03 | 3.14E-05 | 0.317 | 0.261 | 1.32 | 1.16 | -1.5  | 1.12 | 2.17E-02 | STK33                                               | intronic       |
| 14 | 70290372  | C | T | rs4362329;rs386778565 | 3.52E-05 | 0.277 | 0.336 | 0.76 | 0.66 | -0.87 | 3.76E-01 | 0.321 | 0.308 | 1.06 | 0.94 | -1.2  | 0.89 | 2.18E-02 | SLC10A1(dist=26366), SMOC1(dist=55742)              | intergenic     |
| 7  | 113535598 | T | C | rs73716343            | 4.28E-01 | 0.301 | 0.313 | 0.95 | 0.83 | -1.08 | 5.17E-05 | 0.343 | 0.290 | 1.28 | 1.13 | -1.45 | 1.12 | 2.18E-02 | PPP1R3A                                             | intronic       |
| 6  | 29857481  | C | T | rs113828362           | 4.76E-05 | 0.029 | 0.050 | 0.56 | 0.39 | -0.79 | 7.96E-01 | 0.059 | 0.055 | 1.09 | 0.85 | -1.39 | 0.76 | 2.18E-02 | HLA-H                                               | ncRNA_intronic |
| 3  | 168355606 | T | C | rs9858473             | 3.43E-01 | 0.122 | 0.122 | 1.00 | 0.83 | -1.21 | 2.13E-05 | 0.164 | 0.134 | 0.78 | 0.67 | -0.92 | 0.85 | 2.19E-02 | EGFEM1P                                             | ncRNA_intronic |
| 7  | 14248167  | T | A | rs6948615             | 6.89E-01 | 0.154 | 0.165 | 0.92 | 0.78 | -1.1  | 2.82E-05 | 0.169 | 0.131 | 1.35 | 1.15 | -1.59 | 1.18 | 2.20E-02 | DGKB                                                | intronic       |
| 4  | 8323436   | G | T | rs59072166            | 4.39E-01 | 0.437 | 0.450 | 1.05 | 0.93 | -1.19 | 4.43E-05 | 0.450 | 0.400 | 0.82 | 0.72 | -0.92 | 0.89 | 2.20E-02 | HTRA3(dist=14598), ACOX3(dist=44573)                | intergenic     |
| 11 | 7858214   | C | T | rs10839884            | 3.29E-01 | 0.413 | 0.382 | 1.13 | 1    | -1.29 | 1.82E-05 | 0.343 | 0.417 | 0.73 | 0.65 | -0.83 | 0.90 | 2.21E-02 | OR5P3(dist=10695), OR5E1P(dist=12384)               | intergenic     |
| 4  | 68207449  | A | G | rs1946920             | 3.70E-01 | 0.235 | 0.246 | 0.94 | 0.82 | -1.09 | 5.92E-05 | 0.278 | 0.233 | 1.27 | 1.11 | -1.44 | 1.13 | 2.21E-02 | MIR1269A(dist=1064803), LOC101927237(dist=75574)    | intergenic     |
| 17 | 64449239  | T | C | rs12948610            | 5.12E-01 | 0.401 | 0.405 | 1.01 | 0.89 | -1.15 | 3.14E-05 | 0.471 | 0.423 | 0.82 | 0.73 | -0.93 | 0.90 | 2.21E-02 | PRKCA                                               | intronic       |
| 14 | 105079171 | T | C | rs10135130            | 2.24E-01 | 0.124 | 0.136 | 1.11 | 0.92 | -1.34 | 1.73E-05 | 0.173 | 0.130 | 0.71 | 0.61 | -0.84 | 0.86 | 2.21E-02 | TMEM179(dist=8074), MIR4710(dist=64860)             | intergenic     |
| 10 | 43785421  | G | A | rs79510300            | 3.81E-05 | 0.051 | 0.028 | 1.89 | 1.37 | -2.59 | 9.68E-01 | 0.041 | 0.043 | 0.94 | 0.7  | -1.26 | 1.36 | 2.23E-02 | RASGEF1A(dist=23054), FXDY4(dist=81671)             | intergenic     |
| 6  | 31523684  | C | A | rs550585935           | 4.12E-01 | 0.382 | 0.400 | 0.93 | 0.82 | -1.05 | 5.79E-05 | 0.433 | 0.376 | 1.27 | 1.12 | -1.43 | 1.13 | 2.23E-02 | NFKB1L1                                             | intronic       |
| 6  | 5003928   | C | A | rs73359952            | 4.99E-05 | 0.046 | 0.024 | 1.93 | 1.38 | -2.69 | 5.28E-01 | 0.032 | 0.034 | 0.93 | 0.67 | -1.3  | 1.36 | 2.24E-02 | RPP40                                               | intronic       |
| 11 | 97805685  | C | T | rs11213252            | 3.83E-01 | 0.082 | 0.078 | 1.06 | 0.84 | -1.33 | 3.22E-05 | 0.110 | 0.087 | 1.30 | 1.07 | -1.58 | 1.21 | 2.24E-02 | JRKL-AS1(dist=1565644), CNTN5(dist=1086021)         | intergenic     |
| 3  | 102998357 | T | C | rs9790025             | 9.56E-07 | 0.448 | 0.368 | 0.72 | 0.63 | -0.81 | 1.15E-01 | 0.383 | 0.409 | 1.11 | 0.99 | -1.26 | 0.90 | 2.26E-02 | ZPLD1(dist=799672), MIR548AB(dist=244520)           | intergenic     |
| 10 | 51533376  | C | T | rs9787697             | 1.48E-05 | 0.250 | 0.182 | 1.50 | 1.29 | -1.74 | 6.38E-01 | 0.213 | 0.227 | 0.92 | 0.8  | -1.06 | 1.14 | 2.26E-02 | TIMM23B                                             | intronic       |
| 2  | 158857586 | G | C | rs17419998            | 4.00E-01 | 0.028 | 0.027 | 1.04 | 0.71 | -1.51 | 4.78E-05 | 0.045 | 0.029 | 1.60 | 1.19 | -2.14 | 1.39 | 2.27E-02 | UPP2                                                | intronic       |
| 17 | 15895365  | C | A | rs112909984           | 6.45E-01 | 0.350 | 0.356 | 0.98 | 0.86 | -1.11 | 5.88E-05 | 0.281 | 0.317 | 0.84 | 0.74 | -0.96 | 0.89 | 2.28E-02 | ZSWIM7                                              | intronic       |
| 15 | 27629735  | G | T | rs75307139            | 7.54E-01 | 0.047 | 0.051 | 0.92 | 0.69 | -1.23 | 2.83E-05 | 0.051 | 0.031 | 1.67 | 1.27 | -2.21 | 1.33 | 2.29E-02 | GABRG3                                              | intronic       |
| 8  | 3108085   | T | G | rs78561648            | 3.87E-01 | 0.290 | 0.307 | 1.08 | 0.95 | -1.24 | 5.00E-05 | 0.332 | 0.272 | 0.75 | 0.66 | -0.85 | 0.89 | 2.33E-02 | CSMD1                                               | intronic       |
| 15 | 27630264  | T | C | rs78559188            | 7.46E-01 | 0.047 | 0.051 | 0.92 | 0.69 | -1.23 | 2.85E-05 | 0.051 | 0.031 | 1.67 | 1.27 | -2.21 | 1.32 | 2.33E-02 | GABRG3                                              | intronic       |
| 14 | 105056239 | G | A | rs12589               |          |       |       |      |      |       |          |       |       |      |      |       |      |          |                                                     |                |



|    |           |   |   |                       |          |       |       |      |      |       |          |       |       |      |      |       |      |          |                                                     |                |
|----|-----------|---|---|-----------------------|----------|-------|-------|------|------|-------|----------|-------|-------|------|------|-------|------|----------|-----------------------------------------------------|----------------|
| 19 | 22667619  | C | T | rs2905568             | 5.93E-01 | 0.028 | 0.033 | 0.83 | 0.58 | -1.2  | 4.91E-05 | 0.037 | 0.021 | 1.78 | 1.28 | -2.48 | 1.45 | 2.46E-02 | ZNF98(dist=62471), LOC101929124(dist=36178)         | intergenic     |
| 10 | 131147153 | G | A | rs10829593            | 1.31E-01 | 0.187 | 0.199 | 0.92 | 0.79 | -1.08 | 9.70E-06 | 0.262 | 0.224 | 1.23 | 1.07 | -1.4  | 1.16 | 2.47E-02 | LINC01163(dist=1031163), MGMT(dist=118301)          | intergenic     |
| 11 | 8510768   | C | T | rs11041949            | 3.32E-01 | 0.281 | 0.305 | 0.89 | 0.78 | -1.02 | 2.39E-05 | 0.321 | 0.263 | 1.32 | 1.16 | -1.5  | 1.12 | 2.48E-02 | STK33                                               | intronic       |
| 14 | 70290365  | T | C | rs4499177             | 6.12E-05 | 0.269 | 0.325 | 0.77 | 0.67 | -0.88 | 4.02E-01 | 0.310 | 0.299 | 1.05 | 0.93 | -1.2  | 0.89 | 2.49E-02 | SLC10A1(dist=26359), SMOG1(dist=55749)              | intergenic     |
| 10 | 45086041  | C | G | rs17487158            | 2.20E-05 | 0.053 | 0.023 | 2.35 | 1.7  | -3.26 | 6.79E-01 | 0.039 | 0.043 | 0.89 | 0.66 | -1.21 | 1.33 | 2.49E-02 | CXCL12(dist=205496), TMEM72-AS1(dist=220431)        | intergenic     |
| 10 | 45102034  | C | T | rs75290175            | 2.52E-05 | 0.052 | 0.022 | 2.38 | 1.71 | -3.32 | 7.03E-01 | 0.039 | 0.043 | 0.90 | 0.67 | -1.21 | 1.34 | 2.50E-02 | CXCL12(dist=221489), TMEM72-AS1(dist=204438)        | intergenic     |
| 3  | 168355026 | G | A | rs3911096             | 3.83E-01 | 0.118 | 0.117 | 0.99 | 0.82 | -1.2  | 4.34E-05 | 0.160 | 0.131 | 0.79 | 0.67 | -0.93 | 0.85 | 2.50E-02 | EGFEM1P                                             | ncRNA_intronic |
| 8  | 73349039  | T | C | rs972220              | 3.13E-01 | 0.330 | 0.337 | 0.97 | 0.85 | -1.11 | 2.42E-05 | 0.391 | 0.342 | 1.24 | 1.1  | -1.4  | 1.12 | 2.51E-02 | LOC392232(dist=185170), KCNB2(dist=100587)          | intergenic     |
| 8  | 89298250  | C | T | rs61656674            | 2.51E-01 | 0.108 | 0.104 | 1.05 | 0.86 | -1.28 | 2.97E-05 | 0.072 | 0.102 | 0.68 | 0.54 | -0.85 | 0.84 | 2.51E-02 | MMP16                                               | intronic       |
| 10 | 45087603  | C | T | rs11592776            | 2.30E-05 | 0.053 | 0.023 | 2.35 | 1.7  | -3.26 | 6.84E-01 | 0.039 | 0.043 | 0.90 | 0.66 | -1.21 | 1.33 | 2.51E-02 | CXCL12(dist=207058), TMEM72-AS1(dist=218869)        | intergenic     |
| 10 | 45090556  | C | T | rs111397841           | 2.34E-05 | 0.053 | 0.023 | 2.36 | 1.7  | -3.27 | 6.86E-01 | 0.039 | 0.043 | 0.90 | 0.66 | -1.21 | 1.33 | 2.52E-02 | CXCL12(dist=210011), TMEM72-AS1(dist=215916)        | intergenic     |
| 5  | 68301163  | A | G | rs4594812             | 4.63E-01 | 0.480 | 0.503 | 1.10 | 0.97 | -1.24 | 4.99E-05 | 0.533 | 0.462 | 0.75 | 0.67 | -0.85 | 0.90 | 2.53E-02 | LOC101928885                                        | ncRNA_intronic |
| 4  | 7805994   | C | T | rs56270003            | 3.30E-05 | 0.263 | 0.207 | 1.37 | 1.19 | -1.58 | 3.67E-01 | 0.212 | 0.225 | 0.92 | 0.8  | -1.07 | 1.13 | 2.53E-02 | AFAP1                                               | intronic       |
| 11 | 8525987   | T | C | rs73405938            | 3.32E-01 | 0.281 | 0.305 | 0.89 | 0.78 | -1.02 | 2.64E-05 | 0.320 | 0.262 | 1.32 | 1.16 | -1.5  | 1.12 | 2.54E-02 | STK33                                               | intronic       |
| 8  | 98900769  | A | G | rs7831897             | 3.92E-05 | 0.341 | 0.293 | 0.80 | 0.7  | -0.92 | 4.35E-01 | 0.283 | 0.282 | 1.00 | 0.87 | -1.13 | 0.89 | 2.54E-02 | MATN2                                               | intronic       |
| 11 | 104474468 | A | T | rs11226439            | 2.74E-01 | 0.299 | 0.285 | 1.07 | 0.94 | -1.23 | 2.96E-05 | 0.236 | 0.285 | 0.78 | 0.68 | -0.89 | 0.89 | 2.55E-02 | LOC102723895                                        | ncRNA_intronic |
| 12 | 5070721   | A | T | rs79224966            | 2.17E-05 | 0.061 | 0.030 | 2.06 | 1.53 | -2.77 | 4.79E-01 | 0.055 | 0.064 | 0.85 | 0.66 | -1.1  | 1.29 | 2.59E-02 | KCNA1(dist=43299), KCNA5(dist=82364)                | intergenic     |
| 14 | 105078153 | C | T | rs10136937            | 1.32E-01 | 0.144 | 0.159 | 1.13 | 0.95 | -1.34 | 5.08E-06 | 0.192 | 0.144 | 0.71 | 0.61 | -0.82 | 0.87 | 2.59E-02 | TMEM179(dist=7056), MIR4710(dist=65878)             | intergenic     |
| 6  | 29856495  | G | A | rs111613560           | 5.27E-05 | 0.028 | 0.050 | 0.56 | 0.39 | -0.79 | 7.40E-01 | 0.059 | 0.054 | 1.10 | 0.85 | -1.41 | 0.77 | 2.60E-02 | HLA-H                                               | ncRNA_exonic   |
| 11 | 8512293   | T | C | rs12576961            | 3.31E-01 | 0.281 | 0.306 | 0.89 | 0.78 | -1.02 | 2.71E-05 | 0.320 | 0.263 | 1.32 | 1.16 | -1.5  | 1.12 | 2.61E-02 | STK33                                               | intronic       |
| 1  | 61803341  | C | A | rs12134760            | 2.88E-01 | 0.079 | 0.087 | 0.89 | 0.71 | -1.12 | 2.92E-05 | 0.116 | 0.083 | 1.45 | 1.2  | -1.76 | 1.20 | 2.64E-02 | NFIA                                                | intronic       |
| 10 | 51535931  | T | C | rs10763539            | 2.21E-05 | 0.247 | 0.182 | 1.47 | 1.27 | -1.71 | 6.50E-01 | 0.214 | 0.227 | 0.92 | 0.8  | -1.06 | 1.14 | 2.66E-02 | TIMM23B                                             | intronic       |
| 3  | 63942188  | C | G | rs28675788            | 1.58E-01 | 0.193 | 0.217 | 0.87 | 0.74 | -1.01 | 8.79E-06 | 0.243 | 0.191 | 1.36 | 1.18 | -1.56 | 1.13 | 2.68E-02 | ATXN7                                               | intronic       |
| 13 | 19572789  | C | T | rs75204121            | 4.51E-01 | 0.034 | 0.042 | 0.82 | 0.59 | -1.14 | 3.42E-05 | 0.047 | 0.027 | 1.76 | 1.31 | -2.35 | 1.37 | 2.68E-02 | LINC00408(dist=71908), LINC00442(dist=9610)         | intergenic     |
| 11 | 18601790  | C | T | rs61884723            | 2.67E-01 | 0.026 | 0.027 | 0.93 | 0.63 | -1.37 | 4.98E-05 | 0.051 | 0.036 | 1.46 | 1.11 | -1.93 | 1.35 | 2.69E-02 | UEVLD                                               | intronic       |
| 3  | 63885615  | T | C | rs864975              | 1.57E-01 | 0.189 | 0.213 | 1.16 | 1    | -1.36 | 9.15E-06 | 0.237 | 0.185 | 0.73 | 0.64 | -0.84 | 0.88 | 2.69E-02 | ATXN7                                               | intronic       |
| 10 | 51489367  | C | T | rs2843566             | 1.95E-05 | 0.276 | 0.214 | 1.40 | 1.22 | -1.62 | 5.60E-01 | 0.265 | 0.281 | 0.93 | 0.81 | -1.06 | 1.16 | 2.70E-02 | TIMM23B                                             | intronic       |
| 3  | 70340088  | C | A | rs6766949             | 4.03E-05 | 0.289 | 0.237 | 1.31 | 1.14 | -1.51 | 3.70E-01 | 0.246 | 0.257 | 0.94 | 0.82 | -1.08 | 1.12 | 2.70E-02 | LINC01212(dist=275637), FOXP1(dist=663777)          | intergenic     |
| 18 | 6957276   | C | G | rs57275297            | 2.69E-02 | 0.117 | 0.141 | 0.80 | 0.66 | -0.97 | 2.64E-05 | 0.116 | 0.090 | 1.33 | 1.1  | -1.61 | 0.76 | 2.70E-02 | LOC101927188                                        | ncRNA_exonic   |
| 1  | 56907563  | T | C | rs5011302             | 6.12E-05 | 0.318 | 0.369 | 1.26 | 1.1  | -1.44 | 3.54E-01 | 0.366 | 0.361 | 0.98 | 0.87 | -1.11 | 1.12 | 2.72E-02 | MIR4422(dist=1216167), PPAP2B(dist=52856)           | intergenic     |
| 13 | 19610086  | C | T | rs139213760           | 5.62E-01 | 0.031 | 0.036 | 0.84 | 0.59 | -1.19 | 3.50E-05 | 0.041 | 0.024 | 1.73 | 1.27 | -2.37 | 1.42 | 2.72E-02 | LINC00442(dist=23312), RNU6-52P(dist=107036)        | intergenic     |
| 4  | 35967098  | G | A | rs1655034             | 9.57E-06 | 0.181 | 0.131 | 0.68 | 0.58 | -0.81 | 3.07E-01 | 0.155 | 0.175 | 1.16 | 0.99 | -1.36 | 0.87 | 2.72E-02 | LOC101928622(dist=1925583), ARAP2(dist=100522)      | intergenic     |
| 3  | 70354813  | C | T | rs9821744             | 3.72E-05 | 0.285 | 0.233 | 1.32 | 1.14 | -1.51 | 3.42E-01 | 0.241 | 0.253 | 0.94 | 0.82 | -1.08 | 1.12 | 2.76E-02 | LINC01212(dist=290362), FOXP1(dist=649052)          | intergenic     |
| 14 | 100192235 | C | T | rs115257069           | 2.77E-05 | 0.053 | 0.034 | 1.60 | 1.19 | -2.16 | 6.13E-01 | 0.038 | 0.039 | 0.98 | 0.72 | -1.32 | 1.33 | 2.78E-02 | CYP46A1                                             | intronic       |
| 2  | 208189865 | C | T | rs59408366            | 2.15E-01 | 0.145 | 0.126 | 1.17 | 0.98 | -1.4  | 1.28E-05 | 0.104 | 0.149 | 0.66 | 0.55 | -0.8  | 0.86 | 2.78E-02 | MIR1302-4(dist=55717), CREB1(dist=204751)           | intergenic     |
| 11 | 8492384   | A | T | rs58049051            | 3.40E-01 | 0.031 | 0.036 | 0.85 | 0.6  | -1.2  | 2.70E-05 | 0.058 | 0.037 | 1.60 | 1.23 | -2.08 | 1.33 | 2.78E-02 | STK33                                               | intronic       |
| 3  | 70350151  | A | T | rs55857676            | 3.74E-05 | 0.286 | 0.233 | 1.32 | 1.14 | -1.51 | 3.53E-01 | 0.242 | 0.253 | 0.94 | 0.82 | -1.08 | 1.12 | 2.79E-02 | LINC01212(dist=285700), FOXP1(dist=653714)          | intergenic     |
| 11 | 18699020  | C | T | rs144787688           | 5.69E-01 | 0.065 | 0.068 | 0.95 | 0.74 | -1.22 | 3.86E-05 | 0.065 | 0.044 | 1.51 | 1.18 | -1.94 | 1.29 | 2.79E-02 | SPTY2D1(dist=43000), TMEM86A(dist=21262)            | intergenic     |
| 2  | 204702013 | G | T | rs4675372             | 3.42E-01 | 0.391 | 0.377 | 1.06 | 0.93 | -1.2  | 5.25E-05 | 0.327 | 0.384 | 0.78 | 0.69 | -0.88 | 0.90 | 2.79E-02 | CD28(dist=98377), CTLA4(dist=30498)                 | intergenic     |
| 8  | 137390523 | T | G | rs142012437           | 8.21E-01 | 0.041 | 0.044 | 0.92 | 0.68 | -1.25 | 5.81E-05 | 0.037 | 0.023 | 1.64 | 1.18 | -2.28 | 1.46 | 2.79E-02 | KHDRBS3(dist=730671), LOC101927915(dist=1027821)    | intergenic     |
| 8  | 5961552   | G | C | rs75241974            | 3.18E-01 | 0.190 | 0.214 | 0.86 | 0.74 | -1.01 | 2.61E-05 | 0.227 | 0.173 | 1.40 | 1.22 | -1.62 | 1.14 | 2.79E-02 | CSMD1(dist=1109224), LOC100287015(dist=299525)      | intergenic     |
| 6  | 67797092  | T | C | rs2503908;rs386702272 | 4.01E-05 | 0.015 | 0.030 | 2.01 | 1.26 | -3.2  | 4.46E-01 | 0.034 | 0.038 | 1.13 | 0.82 | -1.56 | 1.37 | 2.80E-02 | SLC25A51P1(dist=1297716), LOC102723883(dist=968151) | intergenic     |
| 1  | 247363061 | C | T | rs72770366            | 3.21E-05 | 0.098 | 0.142 | 0.66 | 0.54 | -0.8  | 3.99E-01 | 0.155 | 0.144 | 1.09 | 0.93 | -1.28 | 0.85 | 2.81E-02 | ZNF124(dist=27742), MIR3916(dist=2208)              | intergenic     |
| 3  | 70355004  | G | C | rs9858666             | 3.77E-05 | 0.285 | 0.233 | 1.32 | 1.14 | -1.51 | 3.39E-01 | 0.241 | 0.253 | 0.94 | 0.82 | -1.08 | 1.12 | 2.81E-02 | LINC01212(dist=290553), FOXP1(dist=648861)          | intergenic     |
| 3  | 63902629  | G | A | rs6770864             | 1.17E-01 | 0.188 | 0.215 | 0.85 | 0.73 | -0.99 | 4.83E-06 | 0.241 | 0.187 | 1.38 | 1.2  | -1.59 | 1.13 | 2.81E-02 | ATXN7                                               | intronic       |
| 2  | 208189004 | G | C | rs6708803             | 2.12E-01 | 0.145 | 0.126 | 1.17 | 0.98 | -1.4  | 1.25E-05 | 0.103 | 0.148 | 0.66 | 0.55 | -0.8  | 0.86 | 2.82E-02 | MIR1302-4(dist=54856), CREB1(dist=205612)           | intergenic     |
| 2  | 208190557 | G | A | rs138675833           | 2.17E-01 | 0.145 | 0.126 | 1.17 | 0.98 | -1.4  | 1.38E-05 | 0.104 | 0.149 | 0.66 | 0.55 | -0.8  | 0.86 | 2.82E-02 | MIR1302-4(dist=56409), CREB1(dist=204059)           | intergenic     |
| 2  | 208189282 | T | C | rs16839629            | 2.12E-01 | 0.145 | 0.126 | 1.17 | 0.98 | -1.4  | 1.26E-05 | 0.104 | 0.149 | 0.66 | 0.55 | -0.8  | 0.86 | 2.82E-02 | MIR1302-4(dist=55134), CREB1(dist=205334)           | intergenic     |
| 14 | 105058609 | T | C | rs3809460             | 2.39E-01 | 0.119 | 0.130 | 1.11 | 0.92 | -1.34 | 3.06E-05 | 0.163 | 0.122 | 0.72 | 0.61 | -0.84 | 0.86 | 2.82E-02 | TMEM179(NM_001286389;c.*1207A>G)                    | UTR3           |
| 11 | 108386511 | A | T | rs145330547           | 5.49E-05 | 0.039 | 0.022 | 1.80 | 1.26 | -2.57 | 4.52E-01 | 0.025 | 0.027 | 0.93 | 0.64 | -1.34 | 1.40 | 2.84E-02 | EXPH5                                               | intronic       |
| 11 | 108377992 | C | G | rs80303863            | 5.02E-05 | 0.039 | 0.022 | 1.80 | 1.26 | -2.58 | 4.42E-01 | 0.025 | 0.027 | 0.92 | 0.64 | -1.34 | 1.40 | 2.84E-02 | EXPH5(NM_015065;c.*2272G>C)                         | UTR3           |
| 1  | 104464617 | A | G | rs11185332            | 2.00E-01 | 0.246 | 0.260 | 0.93 | 0.8  | -1.07 | 9.91E-06 | 0.313 | 0.260 | 1.30 | 1.14 | -1.47 | 1.12 | 2.85E-02 | AMY1A(dist=163306), LOC100129138(dist=151028)       | intergenic     |
| 14 | 105058810 | G | T | rs3809457             | 2.37E-01 | 0.119 | 0.130 | 1.11 | 0.92 | -1.34 | 3.07E-05 | 0.163 | 0.122 | 0.72 | 0.61 | -0.84 | 0.86 | 2.85E-02 | TMEM179(NM_001286389;c.*1006C>A)                    | UTR3           |
| 10 | 51532751  | G | A | rs4630241             | 2.86E-05 | 0.251 | 0.184 | 1.48 | 1.28 | -1.72 | 6.42E-01 | 0.214 | 0.228 | 0.92 | 0.8  | -1.06 | 1.13 | 2.86E-02 | TIMM23B                                             | intronic       |
| 3  | 70343784  | C | T | rs9866714             | 4.04E-05 | 0.287 | 0.235 | 1.31 | 1.14 | -1.51 | 3.51E-01 | 0.245 | 0.256 | 0.94 | 0.82 | -1.08 | 1.12 | 2.86E-02 | LINC01212(dist=279333), FOXP1(dist=660081)          | intergenic     |
| 3  | 28268286  | C | A | rs11129313            | 5.59E-05 | 0.372 | 0.446 | 0.73 | 0.65 | -0.83 | 3.65E-01 | 0.442 | 0.422 | 1.08 | 0.96 | -1.22 | 0.90 | 2.86E-02 | EOMES(dist=504080), CMC1(dist=14838)                | intergenic     |
| 12 | 5072479   |   |   |                       |          |       |       |      |      |       |          |       |       |      |      |       |      |          |                                                     |                |

|    |           |   |   |                        |          |       |       |      |             |          |       |       |      |             |      |          |                                                 |                |
|----|-----------|---|---|------------------------|----------|-------|-------|------|-------------|----------|-------|-------|------|-------------|------|----------|-------------------------------------------------|----------------|
| 11 | 8513242   | G | A | rs7933271              | 3.24E-01 | 0.281 | 0.305 | 0.89 | 0.78 - 1.02 | 3.25E-05 | 0.319 | 0.263 | 1.32 | 1.16 - 1.49 | 1.12 | 2.93E-02 | STK33                                           | intronic       |
| 11 | 8539069   | C | T | rs12226069             | 2.71E-01 | 0.296 | 0.321 | 0.89 | 0.78 - 1.02 | 1.79E-05 | 0.330 | 0.275 | 1.30 | 1.15 - 1.48 | 1.12 | 2.94E-02 | STK33                                           | intronic       |
| 11 | 8489008   | T | C | rs149189806            | 3.46E-01 | 0.030 | 0.036 | 0.85 | 0.6 - 1.21  | 2.94E-05 | 0.056 | 0.036 | 1.60 | 1.23 - 2.09 | 1.33 | 2.95E-02 | STK33                                           | intronic       |
| 2  | 96782402  | C | T | rs192933554            | 4.11E-01 | 0.032 | 0.035 | 0.91 | 0.64 - 1.29 | 2.22E-05 | 0.042 | 0.026 | 1.63 | 1.19 - 2.21 | 1.45 | 2.95E-02 | ADORA2B                                         | upstream       |
| 12 | 44275761  | G | C | rs181909989            | 2.19E-01 | 0.083 | 0.097 | 0.84 | 0.68 - 1.05 | 2.32E-05 | 0.115 | 0.079 | 1.53 | 1.26 - 1.84 | 1.21 | 2.96E-02 | TMEM117                                         | intronic       |
| 13 | 106145934 | G | A | rs9519690              | 2.52E-01 | 0.214 | 0.228 | 0.92 | 0.79 - 1.07 | 4.11E-05 | 0.262 | 0.217 | 1.28 | 1.12 - 1.46 | 1.13 | 2.98E-02 | DAOA-AS1                                        | ncRNA_intronic |
| 13 | 106150041 | A | T | rs778326               | 2.41E-01 | 0.213 | 0.228 | 0.92 | 0.79 - 1.07 | 3.87E-05 | 0.262 | 0.217 | 1.28 | 1.12 - 1.46 | 1.13 | 2.98E-02 | DAOA-AS1                                        | ncRNA_intronic |
| 3  | 70339885  | C | T | rs6766653              | 1.32E-05 | 0.304 | 0.249 | 1.32 | 1.15 - 1.51 | 2.30E-01 | 0.252 | 0.266 | 0.93 | 0.81 - 1.06 | 1.12 | 3.00E-02 | LINC01212(dist=275434), FOXF1(dist=663980)      | intergenic     |
| 3  | 168355421 | C | T | rs9838054              | 3.58E-01 | 0.124 | 0.124 | 1.00 | 0.83 - 1.21 | 5.08E-05 | 0.164 | 0.135 | 0.79 | 0.68 - 0.93 | 0.86 | 3.00E-02 | EGFEM1P                                         | ncRNA_intronic |
| 7  | 113541630 | C | T | rs6466472              | 3.57E-01 | 0.296 | 0.309 | 1.07 | 0.93 - 1.22 | 6.26E-05 | 0.342 | 0.289 | 0.78 | 0.69 - 0.89 | 0.90 | 3.00E-02 | PPP1R3A                                         | intronic       |
| 1  | 61802286  | T | C | rs12066006             | 2.19E-01 | 0.071 | 0.080 | 0.88 | 0.69 - 1.11 | 1.83E-05 | 0.111 | 0.079 | 1.45 | 1.2 - 1.76  | 1.20 | 3.04E-02 | NFIA                                            | intronic       |
| 19 | 12353181  | C | T | rs111327833            | 4.68E-05 | 0.284 | 0.233 | 1.30 | 1.13 - 1.5  | 4.53E-01 | 0.247 | 0.250 | 0.98 | 0.86 - 1.12 | 1.12 | 3.04E-02 | LOC100289333(dist=34790), ZNF44(dist=29444)     | intergenic     |
| 2  | 26850672  | T | A | rs7595672              | 4.24E-01 | 0.186 | 0.202 | 0.90 | 0.77 - 1.06 | 5.90E-05 | 0.234 | 0.187 | 1.33 | 1.15 - 1.53 | 1.14 | 3.04E-02 | CIB4                                            | intronic       |
| 12 | 101216304 | C | T | rs79345371             | 4.20E-05 | 0.076 | 0.048 | 1.63 | 1.27 - 2.11 | 4.27E-01 | 0.056 | 0.057 | 0.97 | 0.75 - 1.25 | 1.24 | 3.04E-02 | ANO4                                            | intronic       |
| 8  | 5390912   | G | A | rs10091352             | 2.89E-05 | 0.019 | 0.046 | 0.40 | 0.27 - 0.61 | 2.54E-01 | 0.036 | 0.029 | 1.26 | 0.91 - 1.74 | 0.75 | 3.06E-02 | CSMD1(dist=538584), LOC100287015(dist=870165)   | intergenic     |
| 11 | 8597545   | G | C | rs145589246            | 2.57E-01 | 0.022 | 0.029 | 0.76 | 0.51 - 1.14 | 2.45E-05 | 0.041 | 0.021 | 1.96 | 1.43 - 2.69 | 1.38 | 3.08E-02 | STK33                                           | intronic       |
| 16 | 19647698  | A | G | rs16972272             | 5.76E-05 | 0.158 | 0.215 | 0.68 | 0.58 - 0.81 | 4.14E-01 | 0.182 | 0.164 | 1.13 | 0.97 - 1.32 | 0.88 | 3.08E-02 | C16orf62                                        | intronic       |
| 2  | 60124003  | C | T | rs6752231              | 3.37E-01 | 0.321 | 0.303 | 0.92 | 0.81 - 1.05 | 5.05E-05 | 0.254 | 0.314 | 1.34 | 1.17 - 1.53 | 1.12 | 3.09E-02 | LOC101927285(dist=617468), MIR4432(dist=490494) | intergenic     |
| 13 | 38367563  | T | C | rs141972942            | 6.49E-05 | 0.180 | 0.149 | 1.26 | 1.07 - 1.49 | 4.67E-01 | 0.149 | 0.149 | 1.00 | 0.85 - 1.18 | 1.17 | 3.09E-02 | TRPC4                                           | intronic       |
| 11 | 8504500   | G | T | rs57313949             | 2.50E-01 | 0.270 | 0.295 | 0.88 | 0.77 - 1.01 | 1.27E-05 | 0.305 | 0.249 | 1.32 | 1.16 - 1.51 | 1.12 | 3.10E-02 | STK33                                           | intronic       |
| 12 | 101216722 | G | A | rs57600454             | 4.21E-05 | 0.076 | 0.048 | 1.63 | 1.27 - 2.11 | 4.18E-01 | 0.056 | 0.057 | 0.97 | 0.75 - 1.25 | 1.24 | 3.12E-02 | ANO4                                            | intronic       |
| 12 | 5070097   | C | G | rs75872755             | 3.61E-05 | 0.058 | 0.029 | 2.08 | 1.54 - 2.82 | 4.80E-01 | 0.054 | 0.063 | 0.85 | 0.66 - 1.1  | 1.28 | 3.12E-02 | KCNA1(dist=42675), KCNA5(dist=82988)            | intergenic     |
| 8  | 5406445   | G | C | rs75722386             | 3.83E-05 | 0.021 | 0.048 | 0.43 | 0.29 - 0.64 | 2.40E-01 | 0.035 | 0.028 | 1.27 | 0.91 - 1.76 | 0.75 | 3.12E-02 | CSMD1(dist=554117), LOC100287015(dist=854632)   | intergenic     |
| 12 | 101216694 | T | C | rs57543672             | 4.22E-05 | 0.076 | 0.048 | 1.63 | 1.27 - 2.11 | 4.18E-01 | 0.056 | 0.057 | 0.97 | 0.75 - 1.25 | 1.24 | 3.12E-02 | ANO4                                            | intronic       |
| 1  | 61808086  | C | T | rs9436635              | 3.01E-01 | 0.078 | 0.086 | 0.90 | 0.71 - 1.13 | 5.31E-05 | 0.115 | 0.083 | 1.44 | 1.19 - 1.74 | 1.19 | 3.13E-02 | NFIA                                            | intronic       |
| 3  | 70342021  | T | G | rs73102695             | 4.45E-05 | 0.287 | 0.235 | 1.31 | 1.14 - 1.51 | 3.36E-01 | 0.244 | 0.256 | 0.94 | 0.82 - 1.08 | 1.12 | 3.14E-02 | LINC01212(dist=277570), FOXF1(dist=661844)      | intergenic     |
| 2  | 204730465 | C | T | rs736611               | 2.30E-01 | 0.465 | 0.450 | 0.94 | 0.83 - 1.07 | 2.32E-05 | 0.416 | 0.473 | 1.26 | 1.12 - 1.42 | 1.10 | 3.14E-02 | CD28(dist=126829), CTLA4(dist=2046)             | intergenic     |
| 11 | 8524933   | T | C | rs61447809             | 1.95E-01 | 0.302 | 0.328 | 0.89 | 0.77 - 1.01 | 9.64E-06 | 0.347 | 0.289 | 1.31 | 1.15 - 1.48 | 1.11 | 3.15E-02 | STK33                                           | intronic       |
| 14 | 105065452 | A | G | rs8017525              | 1.82E-01 | 0.116 | 0.129 | 1.13 | 0.93 - 1.36 | 1.97E-05 | 0.161 | 0.120 | 0.71 | 0.6 - 0.84  | 0.86 | 3.16E-02 | TMEM179                                         | intronic       |
| 11 | 104483850 | T | C | rs12799900             | 2.62E-01 | 0.303 | 0.288 | 1.08 | 0.94 - 1.23 | 4.45E-05 | 0.243 | 0.292 | 0.78 | 0.68 - 0.89 | 0.90 | 3.17E-02 | LOC102723895(dist=3820), CASP12(dist=272595)    | intergenic     |
| 5  | 148638495 | G | A | rs55894852             | 4.01E-01 | 0.348 | 0.345 | 1.01 | 0.89 - 1.16 | 4.15E-05 | 0.281 | 0.319 | 0.84 | 0.73 - 0.95 | 0.90 | 3.18E-02 | ABLIM3                                          | UTR3           |
| 8  | 5392397   | C | T | rs10096840             | 3.08E-05 | 0.019 | 0.046 | 0.40 | 0.27 - 0.61 | 2.49E-01 | 0.036 | 0.029 | 1.26 | 0.92 - 1.74 | 0.75 | 3.18E-02 | CSMD1(dist=540069), LOC100287015(dist=868680)   | intergenic     |
| 11 | 7854519   | C | T | rs7947347              | 2.93E-01 | 0.438 | 0.462 | 1.10 | 0.97 - 1.25 | 4.02E-05 | 0.501 | 0.435 | 0.77 | 0.68 - 0.86 | 0.91 | 3.19E-02 | OR5P3(dist=7000), OR5E1P(dist=16079)            | intergenic     |
| 11 | 8495512   | G | C | rs142599164            | 3.73E-01 | 0.032 | 0.037 | 0.86 | 0.61 - 1.21 | 4.75E-05 | 0.058 | 0.038 | 1.55 | 1.2 - 2.02  | 1.32 | 3.19E-02 | STK33                                           | intronic       |
| 11 | 7854821   | A | G | rs10769836             | 2.91E-01 | 0.438 | 0.462 | 1.10 | 0.97 - 1.25 | 3.88E-05 | 0.501 | 0.436 | 0.77 | 0.68 - 0.86 | 0.91 | 3.19E-02 | OR5P3(dist=7302), OR5E1P(dist=15777)            | intergenic     |
| 12 | 44246260  | C | T | rs142632597            | 1.81E-01 | 0.039 | 0.049 | 0.79 | 0.58 - 1.07 | 3.06E-05 | 0.070 | 0.041 | 1.75 | 1.37 - 2.23 | 1.26 | 3.21E-02 | TMEM117                                         | intronic       |
| 11 | 69330983  | G | A | rs661204               | 5.21E-05 | 0.163 | 0.124 | 1.38 | 1.16 - 1.64 | 2.89E-01 | 0.115 | 0.125 | 0.91 | 0.76 - 1.09 | 1.16 | 3.21E-02 | LINC01488(dist=22672), CCND1(dist=124890)       | intergenic     |
| 11 | 8542531   | T | C | rs147245248            | 2.90E-01 | 0.021 | 0.028 | 0.77 | 0.51 - 1.16 | 3.67E-05 | 0.040 | 0.021 | 1.95 | 1.42 - 2.69 | 1.37 | 3.22E-02 | STK33                                           | intronic       |
| 8  | 5414166   | T | C | rs28551079             | 4.14E-05 | 0.022 | 0.048 | 0.44 | 0.3 - 0.65  | 2.93E-01 | 0.036 | 0.029 | 1.26 | 0.91 - 1.74 | 0.76 | 3.22E-02 | CSMD1(dist=561838), LOC100287015(dist=846911)   | intergenic     |
| 12 | 44307017  | C | A | rs114509402            | 2.00E-01 | 0.039 | 0.049 | 0.79 | 0.58 - 1.08 | 3.28E-05 | 0.070 | 0.042 | 1.72 | 1.35 - 2.2  | 1.26 | 3.22E-02 | TMEM117                                         | intronic       |
| 3  | 63857071  | G | A | rs832194               | 1.05E-01 | 0.186 | 0.211 | 1.17 | 1 - 1.37    | 5.85E-06 | 0.243 | 0.190 | 0.73 | 0.64 - 0.84 | 0.89 | 3.22E-02 | ATXN7                                           | intronic       |
| 15 | 27626590  | T | C | rs77332886             | 6.59E-01 | 0.048 | 0.052 | 0.90 | 0.68 - 1.2  | 5.00E-05 | 0.053 | 0.033 | 1.63 | 1.24 - 2.15 | 1.31 | 3.24E-02 | GABRG3                                          | intronic       |
| 4  | 81913206  | A | C | rs12186250             | 3.13E-01 | 0.025 | 0.033 | 1.31 | 0.9 - 1.92  | 4.55E-05 | 0.045 | 0.025 | 0.55 | 0.4 - 0.74  | 0.73 | 3.25E-02 | C4orf22(dist=28296), BMP3(dist=38913)           | intergenic     |
| 1  | 242375711 | C | T | rs316851               | 2.33E-05 | 0.120 | 0.086 | 1.45 | 1.19 - 1.77 | 2.16E-01 | 0.081 | 0.088 | 0.92 | 0.74 - 1.13 | 1.19 | 3.25E-02 | PLD5                                            | intronic       |
| 5  | 68295773  | A | G | rs6888650              | 3.10E-01 | 0.421 | 0.444 | 1.10 | 0.97 - 1.24 | 1.73E-05 | 0.471 | 0.403 | 0.76 | 0.67 - 0.85 | 0.90 | 3.26E-02 | LOC101928885                                    | ncRNA_intronic |
| 12 | 44297829  | G | A | rs74645479             | 1.89E-01 | 0.039 | 0.049 | 0.79 | 0.58 - 1.08 | 3.28E-05 | 0.070 | 0.042 | 1.73 | 1.36 - 2.21 | 1.26 | 3.26E-02 | TMEM117                                         | intronic       |
| 12 | 44297054  | G | A | rs74316358             | 1.90E-01 | 0.039 | 0.049 | 0.79 | 0.58 - 1.08 | 3.29E-05 | 0.070 | 0.042 | 1.73 | 1.36 - 2.21 | 1.26 | 3.26E-02 | TMEM117                                         | intronic       |
| 12 | 44297540  | G | A | rs114409843            | 1.89E-01 | 0.039 | 0.049 | 0.79 | 0.58 - 1.08 | 3.29E-05 | 0.070 | 0.042 | 1.73 | 1.36 - 2.21 | 1.26 | 3.26E-02 | TMEM117                                         | intronic       |
| 12 | 44253368  | C | T | rs74370393             | 1.80E-01 | 0.039 | 0.049 | 0.78 | 0.58 - 1.07 | 3.12E-05 | 0.069 | 0.041 | 1.76 | 1.38 - 2.24 | 1.26 | 3.27E-02 | TMEM117                                         | intronic       |
| 12 | 44294609  | A | G | rs17093850             | 1.89E-01 | 0.039 | 0.049 | 0.79 | 0.58 - 1.07 | 3.30E-05 | 0.070 | 0.042 | 1.73 | 1.36 - 2.21 | 1.26 | 3.27E-02 | TMEM117                                         | intronic       |
| 13 | 106147572 | G | A | rs778324               | 2.41E-01 | 0.213 | 0.228 | 0.92 | 0.79 - 1.07 | 4.81E-05 | 0.259 | 0.215 | 1.28 | 1.12 - 1.46 | 1.13 | 3.28E-02 | DAOA-AS1                                        | ncRNA_intronic |
| 12 | 44294318  | C | T | rs146710083            | 1.89E-01 | 0.039 | 0.049 | 0.79 | 0.58 - 1.07 | 3.30E-05 | 0.070 | 0.042 | 1.73 | 1.36 - 2.21 | 1.26 | 3.28E-02 | TMEM117                                         | intronic       |
| 12 | 44294097  | A | T | rs17093848             | 1.89E-01 | 0.039 | 0.049 | 0.79 | 0.58 - 1.07 | 3.31E-05 | 0.070 | 0.042 | 1.73 | 1.36 - 2.21 | 1.26 | 3.28E-02 | TMEM117                                         | intronic       |
| 8  | 5393313   | T | G | rs113539210            | 3.29E-05 | 0.019 | 0.046 | 0.41 | 0.27 - 0.61 | 2.46E-01 | 0.036 | 0.029 | 1.26 | 0.92 - 1.74 | 0.76 | 3.28E-02 | CSMD1(dist=540985), LOC100287015(dist=867764)   | intergenic     |
| 11 | 8493646   | T | A | rs7121234              | 3.59E-01 | 0.022 | 0.027 | 0.79 | 0.53 - 1.19 | 4.34E-05 | 0.041 | 0.023 | 1.82 | 1.33 - 2.5  | 1.38 | 3.29E-02 | STK33                                           | intronic       |
| 12 | 44250105  | C | T | rs77124140             | 1.80E-01 | 0.039 | 0.049 | 0.78 | 0.58 - 1.07 | 3.20E-05 | 0.069 | 0.041 | 1.76 | 1.38 - 2.24 | 1.26 | 3.29E-02 | TMEM117                                         | intronic       |
| 12 | 44250094  | T | G | rs1114198854           | 1.80E-01 | 0.039 | 0.049 | 0.78 | 0.58 - 1.07 | 3.21E-05 | 0.069 | 0.041 | 1.76 | 1.38 - 2.24 | 1.26 | 3.29E-02 | TMEM117                                         | intronic       |
| 19 | 12363598  | G | C | rs536194802;rs73002482 | 4.92E-05 | 0.294 | 0.243 | 1.30 | 1.13 - 1.49 | 3.94E-01 | 0.247 | 0.252 | 0.97 | 0.85 - 1.11 | 1.12 | 3.29E-02 | LOC100289333(dist=45207), ZNF44(dist=19027)     | intergenic     |
| 12 | 44247305  | C | T | rs141751094            | 1.81E-01 | 0.039 | 0.049 | 0.79 | 0.58 - 1.07 | 3.26E-05 | 0.069 | 0.041 | 1.76 | 1.38 - 2.24 | 1.26 | 3.29E-02 | TMEM117                                         | intronic       |
| 15 | 91493972  | G | A | rs78738339             | 4.04E-01 | 0.029 | 0.034 | 0.85 | 0.59 - 1.22 | 4.83E-06 | 0.045 | 0     |      |             |      |          |                                                 |                |

|    |             |   |   |                         |          |       |       |      |      |       |          |       |       |      |      |       |      |          |                                                     |                |
|----|-------------|---|---|-------------------------|----------|-------|-------|------|------|-------|----------|-------|-------|------|------|-------|------|----------|-----------------------------------------------------|----------------|
| 12 | 44243371    | C | T | rs138517562             | 1.79E-01 | 0.039 | 0.049 | 0.78 | 0.58 | -1.07 | 3.30E-05 | 0.069 | 0.041 | 1.76 | 1.38 | -2.24 | 1.26 | 3.34E-02 | TMEM117                                             | intronic       |
| 8  | 5413261     | G | A | rs10096477              | 3.60E-05 | 0.022 | 0.049 | 0.44 | 0.3  | -0.65 | 2.67E-01 | 0.037 | 0.029 | 1.27 | 0.92 | -1.74 | 0.76 | 3.34E-02 | CSMD1(dist=560933), LOC100287015(dist=847816)       | intergenic     |
| 13 | 106144345   | C | T | rs7995553               | 2.52E-01 | 0.213 | 0.228 | 0.92 | 0.79 | -1.07 | 5.54E-05 | 0.261 | 0.217 | 1.27 | 1.11 | -1.46 | 1.12 | 3.37E-02 | DAOA-AS1                                            | ncRNA_intronic |
| 10 | 29833637    | G | A | rs11592360              | 6.18E-05 | 0.073 | 0.040 | 1.93 | 1.48 | -2.51 | 7.15E-01 | 0.055 | 0.061 | 0.91 | 0.7  | -1.17 | 1.25 | 3.38E-02 | SVIL                                                | intronic       |
| 6  | 67799450    | A | G | rs1463318               | 6.28E-05 | 0.013 | 0.027 | 2.14 | 1.3  | -3.53 | 4.33E-01 | 0.031 | 0.035 | 1.12 | 0.8  | -1.57 | 1.37 | 3.38E-02 | SLC25A51P1(dist=1300074), LOC102723883(dist=965793) | intergenic     |
| 11 | 104528309   | C | T | rs9666573               | 2.42E-01 | 0.302 | 0.287 | 1.08 | 0.94 | -1.23 | 4.26E-05 | 0.241 | 0.290 | 0.78 | 0.68 | -0.89 | 0.90 | 3.39E-02 | LOC102723895(dist=48279), CASP12(dist=228136)       | intergenic     |
| 11 | 104533337   | A | G | rs56384112              | 2.41E-01 | 0.302 | 0.287 | 1.08 | 0.94 | -1.23 | 4.28E-05 | 0.241 | 0.290 | 0.78 | 0.68 | -0.89 | 0.90 | 3.41E-02 | LOC102723895(dist=53307), CASP12(dist=223108)       | intergenic     |
| 11 | 8511381     | G | A | rs114726291             | 3.02E-01 | 0.022 | 0.028 | 0.77 | 0.51 | -1.17 | 4.21E-05 | 0.041 | 0.022 | 1.89 | 1.38 | -2.59 | 1.37 | 3.41E-02 | STK33                                               | intronic       |
| 11 | 104534934   | A | G | rs11226459              | 2.42E-01 | 0.302 | 0.287 | 1.07 | 0.94 | -1.23 | 4.32E-05 | 0.241 | 0.290 | 0.78 | 0.68 | -0.89 | 0.90 | 3.41E-02 | LOC102723895(dist=54904), CASP12(dist=221511)       | intergenic     |
| 2  | 204729795   | G | A | rs1427680               | 2.27E-01 | 0.465 | 0.450 | 0.94 | 0.83 | -1.07 | 2.88E-05 | 0.412 | 0.470 | 1.26 | 1.12 | -1.42 | 1.10 | 3.42E-02 | CD28(dist=126159), CTLA4(dist=2716)                 | intergenic     |
| 12 | 44288963    | A | G | rs77669492              | 1.83E-01 | 0.039 | 0.049 | 0.79 | 0.58 | -1.07 | 3.39E-05 | 0.070 | 0.041 | 1.74 | 1.36 | -2.21 | 1.26 | 3.43E-02 | TMEM117                                             | intronic       |
| 16 | 19640926    | G | A | rs9337040               | 5.72E-05 | 0.160 | 0.217 | 0.69 | 0.58 | -0.81 | 3.75E-01 | 0.184 | 0.166 | 1.14 | 0.97 | -1.32 | 0.88 | 3.43E-02 | C16orf62                                            | intronic       |
| 8  | 5963920     | G | C | rs57137549              | 1.87E-01 | 0.178 | 0.205 | 0.84 | 0.72 | -0.98 | 1.30E-05 | 0.222 | 0.166 | 1.43 | 1.24 | -1.66 | 1.13 | 3.45E-02 | CSMD1(dist=1111592), LOC100287015(dist=297157)      | intergenic     |
| 16 | 19647809    | A | G | rs16972275              | 6.27E-05 | 0.159 | 0.216 | 0.69 | 0.58 | -0.81 | 3.86E-01 | 0.182 | 0.164 | 1.13 | 0.97 | -1.32 | 0.88 | 3.45E-02 | C16orf62                                            | intronic       |
| 12 | 44261761    | A | C | rs148566364             | 1.68E-01 | 0.039 | 0.049 | 0.78 | 0.57 | -1.06 | 3.08E-05 | 0.069 | 0.041 | 1.76 | 1.38 | -2.24 | 1.26 | 3.46E-02 | TMEM117                                             | intronic       |
| 2  | 69883545    | A | G | rs573668663;rs145515383 | 3.23E-05 | 0.129 | 0.101 | 1.33 | 1.1  | -1.61 | 2.97E-01 | 0.099 | 0.103 | 0.96 | 0.79 | -1.16 | 1.20 | 3.49E-02 | AAK1(dist=12568), ANXA4(dist=85582)                 | intergenic     |
| 3  | 70353938    | C | T | rs14033073              | 5.90E-05 | 0.287 | 0.237 | 1.30 | 1.13 | -1.5  | 3.42E-01 | 0.241 | 0.253 | 0.94 | 0.82 | -1.08 | 1.11 | 3.49E-02 | LINC01212(dist=289487), FOXP1(dist=649927)          | intergenic     |
| 12 | 44285237    | G | A | rs146740408             | 1.65E-01 | 0.039 | 0.050 | 0.78 | 0.58 | -1.07 | 2.77E-05 | 0.070 | 0.042 | 1.74 | 1.37 | -2.22 | 1.26 | 3.50E-02 | TMEM117                                             | intronic       |
| 10 | 49683566    | A | G | rs3954044               | 4.75E-05 | 0.265 | 0.187 | 1.56 | 1.35 | -1.81 | 6.21E-01 | 0.254 | 0.274 | 0.90 | 0.79 | -1.03 | 1.14 | 3.50E-02 | ARHGAP22                                            | intronic       |
| 11 | 104582981   | G | A | rs2226749               | 2.67E-01 | 0.310 | 0.296 | 1.07 | 0.93 | -1.22 | 5.35E-05 | 0.250 | 0.298 | 0.78 | 0.69 | -0.9  | 0.90 | 3.51E-02 | LOC102723895(dist=102951), CASP12(dist=173464)      | intergenic     |
| 10 | 33359317    | A | G | rs72786114              | 4.08E-05 | 0.048 | 0.022 | 2.21 | 1.58 | -3.1  | 7.74E-01 | 0.038 | 0.044 | 0.86 | 0.64 | -1.17 | 1.32 | 3.52E-02 | ITGB1(dist=112024), NRP1(dist=107102)               | intergenic     |
| 11 | 104530931   | A | T | rs7102497               | 2.43E-01 | 0.303 | 0.288 | 1.07 | 0.94 | -1.23 | 4.68E-05 | 0.242 | 0.290 | 0.78 | 0.68 | -0.89 | 0.90 | 3.52E-02 | LOC102723895(dist=50901), CASP12(dist=225514)       | intergenic     |
| 18 | 10265575    | A | G | rs36027074              | 4.18E-05 | 0.108 | 0.068 | 1.66 | 1.34 | -2.06 | 3.75E-01 | 0.083 | 0.097 | 0.85 | 0.69 | -1.04 | 1.19 | 3.53E-02 | VAPA(dist=305557), LINC01254(dist=139555)           | intergenic     |
| 11 | 7857526     | G | C | rs2361060               | 2.21E-01 | 0.449 | 0.476 | 1.12 | 0.99 | -1.26 | 2.28E-05 | 0.513 | 0.447 | 0.76 | 0.68 | -0.86 | 0.91 | 3.53E-02 | OR5P3(dist=10007), OR5E1P(dist=13072)               | intergenic     |
| 3  | 102975832   | G | A | rs6787393               | 1.51E-05 | 0.432 | 0.504 | 0.75 | 0.66 | -0.85 | 2.14E-01 | 0.502 | 0.484 | 1.07 | 0.96 | -1.21 | 0.91 | 3.53E-02 | ZPLD1(dist=777147), MIR548AB(dist=267045)           | intergenic     |
| 8  | 5963616     | G | C | rs57358452              | 1.85E-01 | 0.178 | 0.205 | 0.84 | 0.72 | -0.98 | 1.36E-05 | 0.222 | 0.166 | 1.43 | 1.24 | -1.66 | 1.13 | 3.54E-02 | CSMD1(dist=1111288), LOC100287015(dist=297461)      | intergenic     |
| 17 | 73835281    | G | C | rs12603812              | 4.22E-01 | 0.222 | 0.216 | 0.96 | 0.83 | -1.12 | 5.75E-05 | 0.279 | 0.252 | 0.87 | 0.76 | -0.99 | 0.88 | 3.54E-02 | UNC13D                                              | intronic       |
| 17 | 64443995    | T | C | rs228883                | 3.19E-01 | 0.306 | 0.321 | 1.08 | 0.94 | -1.23 | 2.60E-05 | 0.367 | 0.310 | 0.77 | 0.69 | -0.88 | 0.90 | 3.54E-02 | PRKCA                                               | intronic       |
| 12 | 44265681    | A | T | rs114441089             | 1.63E-01 | 0.039 | 0.049 | 0.78 | 0.57 | -1.06 | 3.07E-05 | 0.069 | 0.041 | 1.76 | 1.38 | -2.24 | 1.26 | 3.56E-02 | TMEM117                                             | intronic       |
| 11 | 124078704   | G | A | rs11219499;rs71462043   | 3.31E-01 | 0.138 | 0.140 | 0.98 | 0.82 | -1.18 | 4.11E-05 | 0.162 | 0.134 | 1.25 | 1.06 | -1.47 | 1.17 | 3.57E-02 | VWA5A(dist=61086), OR8G2(dist=16640)                | intergenic     |
| 18 | 3133034     | C | T | rs10468732              | 7.00E-01 | 0.042 | 0.046 | 0.90 | 0.67 | -1.22 | 3.01E-05 | 0.047 | 0.030 | 1.60 | 1.2  | -2.14 | 1.33 | 3.57E-02 | MYOM1                                               | intronic       |
| 12 | 101219969   | T | G | rs116089893             | 5.07E-05 | 0.075 | 0.048 | 1.63 | 1.26 | -2.1  | 3.98E-01 | 0.055 | 0.057 | 0.96 | 0.74 | -1.24 | 1.23 | 3.57E-02 | ANO4                                                | intronic       |
| 2  | 86273189    | G | A | rs75616318              | 1.39E-01 | 0.019 | 0.028 | 0.68 | 0.45 | -1.05 | 1.07E-05 | 0.046 | 0.025 | 1.87 | 1.38 | -2.52 | 1.37 | 3.58E-02 | POLR1A                                              | intronic       |
| 11 | 104494548   | G | A | rs7935104               | 1.81E-01 | 0.306 | 0.289 | 1.09 | 0.95 | -1.24 | 2.29E-05 | 0.240 | 0.290 | 0.77 | 0.67 | -0.88 | 0.90 | 3.58E-02 | LOC102723895(dist=14518), CASP12(dist=261897)       | intergenic     |
| 12 | 44266629    | T | A | rs116521007             | 1.61E-01 | 0.039 | 0.049 | 0.78 | 0.57 | -1.06 | 3.07E-05 | 0.069 | 0.041 | 1.76 | 1.38 | -2.24 | 1.26 | 3.58E-02 | TMEM117                                             | intronic       |
| 10 | 131136401   | C | T | rs1421035               | 1.60E-01 | 0.194 | 0.208 | 0.92 | 0.78 | -1.07 | 3.67E-05 | 0.272 | 0.236 | 1.22 | 1.06 | -1.39 | 1.14 | 3.59E-02 | LINC01163(dist=1020411), MGMT(dist=129053)          | intergenic     |
| 11 | 104516472   | C | T | rs11226454              | 2.48E-01 | 0.302 | 0.287 | 1.07 | 0.94 | -1.23 | 5.21E-05 | 0.241 | 0.289 | 0.78 | 0.68 | -0.89 | 0.90 | 3.59E-02 | LOC102723895(dist=36442), CASP12(dist=239973)       | intergenic     |
| 11 | 104517432   | G | A | rs10502038              | 2.47E-01 | 0.302 | 0.287 | 1.07 | 0.94 | -1.23 | 5.21E-05 | 0.241 | 0.289 | 0.78 | 0.68 | -0.89 | 0.90 | 3.60E-02 | LOC102723895(dist=37402), CASP12(dist=239013)       | intergenic     |
| 2  | 158866311   | T | C | rs11690279              | 2.64E-01 | 0.025 | 0.027 | 0.95 | 0.64 | -1.41 | 1.28E-05 | 0.043 | 0.029 | 1.54 | 1.14 | -2.07 | 1.41 | 3.66E-02 | UPP2                                                | intronic       |
| 11 | 8520408     | G | A | rs7118501               | 1.91E-01 | 0.301 | 0.327 | 0.88 | 0.77 | -1.01 | 1.31E-05 | 0.344 | 0.287 | 1.30 | 1.15 | -1.48 | 1.11 | 3.66E-02 | STK33                                               | intronic       |
| 8  | 1748407     | T | C | rs112044149             | 3.46E-06 | 0.101 | 0.153 | 0.63 | 0.51 | -0.76 | 5.49E-02 | 0.127 | 0.103 | 1.26 | 1.05 | -1.5  | 0.85 | 3.67E-02 | MIR3674                                             | upstream       |
| 14 | 105080510   | A | G | rs10151692              | 2.08E-01 | 0.175 | 0.188 | 1.09 | 0.93 | -1.28 | 6.42E-05 | 0.237 | 0.191 | 0.76 | 0.66 | -0.87 | 0.89 | 3.69E-02 | TMEM179(dist=9413), MIR4710(dist=63521)             | intergenic     |
| 5  | 168832600   | A | T | rs76135517              | 3.23E-01 | 0.074 | 0.085 | 0.87 | 0.69 | -1.1  | 9.18E-06 | 0.088 | 0.059 | 1.55 | 1.25 | -1.92 | 1.26 | 3.69E-02 | SLIT3(dist=104467), SPDL1(dist=178038)              | intergenic     |
| 10 | 131083694   | G | A | rs11016737              | 1.25E-01 | 0.145 | 0.154 | 0.93 | 0.78 | -1.1  | 3.99E-05 | 0.217 | 0.185 | 1.22 | 1.06 | -1.41 | 1.16 | 3.70E-02 | LINC01163(dist=967704), MGMT(dist=181760)           | intergenic     |
| 14 | 105075608   | A | T | rs10129754              | 1.52E-01 | 0.119 | 0.133 | 1.13 | 0.94 | -1.37 | 2.24E-05 | 0.166 | 0.124 | 0.71 | 0.61 | -0.84 | 0.87 | 3.70E-02 | TMEM179(dist=4511), MIR4710(dist=68423)             | intergenic     |
| 12 | 5068121     | G | C | rs78517372              | 3.96E-05 | 0.057 | 0.028 | 2.09 | 1.54 | -2.84 | 4.34E-01 | 0.053 | 0.063 | 0.84 | 0.65 | -1.09 | 1.27 | 3.72E-02 | KCNA1(dist=40699), KCNA5(dist=84964)                | intergenic     |
| 11 | 104473630   | C | T | rs12364844              | 2.13E-01 | 0.295 | 0.279 | 1.08 | 0.95 | -1.24 | 4.01E-05 | 0.233 | 0.282 | 0.77 | 0.68 | -0.89 | 0.90 | 3.72E-02 | LOC102723895                                        | ncRNA_intronic |
| 10 | 33402524    | G | A | rs11009231              | 5.85E-05 | 0.045 | 0.020 | 2.30 | 1.62 | -3.26 | 7.79E-01 | 0.037 | 0.043 | 0.87 | 0.64 | -1.18 | 1.32 | 3.72E-02 | ITGB1(dist=155231), NRP1(dist=63895)                | intergenic     |
| 12 | 44283070    | A | G | rs7302694               | 1.70E-01 | 0.039 | 0.049 | 0.78 | 0.57 | -1.07 | 3.50E-05 | 0.070 | 0.041 | 1.74 | 1.37 | -2.22 | 1.25 | 3.73E-02 | TMEM117                                             | intronic       |
| 10 | 45042929    | T | G | rs79052981              | 5.52E-05 | 0.056 | 0.026 | 2.22 | 1.62 | -3.03 | 5.94E-01 | 0.039 | 0.044 | 0.87 | 0.65 | -1.18 | 1.30 | 3.73E-02 | CXCL12(dist=162384), TMEM72-AS1(dist=263543)        | intergenic     |
| 15 | 90480105    | A | G | rs7169362               | 1.58E-05 | 0.084 | 0.059 | 1.47 | 1.16 | -1.86 | 1.93E-01 | 0.079 | 0.084 | 0.93 | 0.75 | -1.16 | 1.23 | 3.74E-02 | C15orf38-AP3S2(dist=23883), ZNF710(dist=64618)      | intergenic     |
| 8  | 5415253     | G | A | rs10104417              | 2.89E-05 | 0.020 | 0.047 | 0.42 | 0.28 | -0.63 | 2.01E-01 | 0.034 | 0.026 | 1.31 | 0.94 | -1.83 | 0.76 | 3.75E-02 | CSMD1(dist=562925), LOC100287015(dist=845824)       | intergenic     |
| 12 | 1608113     | T | C | rs2019001               | 1.60E-01 | 0.043 | 0.033 | 0.74 | 0.54 | -1.02 | 1.41E-05 | 0.026 | 0.052 | 2.06 | 1.45 | -2.92 | 1.31 | 3.75E-02 | ERC1(dist=3014), LINC00942(dist=1544)               | intergenic     |
| 12 | 5067742     | C | T | rs79334029              | 3.72E-05 | 0.057 | 0.028 | 2.10 | 1.54 | -2.85 | 4.26E-01 | 0.053 | 0.063 | 0.84 | 0.65 | -1.09 | 1.27 | 3.76E-02 | KCNA1(dist=40320), KCNA5(dist=85343)                | intergenic     |
| 12 | 101222300   | C | T | rs114986091             | 5.79E-05 | 0.075 | 0.048 | 1.62 | 1.26 | -2.09 | 3.95E-01 | 0.055 | 0.057 | 0.96 | 0.74 | -1.24 | 1.23 | 3.78E-02 | ANO4                                                | intronic       |
| 11 | 8588680     | C | T | rs144183387             | 2.80E-01 | 0.021 | 0.028 | 0.77 | 0.51 | -1.16 | 5.07E-05 | 0.039 | 0.021 | 1.95 | 1.41 | -2.7  | 1.36 | 3.79E-02 | STK33                                               | intronic       |
| 11 | 104505114</ |   |   |                         |          |       |       |      |      |       |          |       |       |      |      |       |      |          |                                                     |                |

|    |           |   |   |                                   |          |       |       |      |      |       |          |       |       |      |      |       |      |          |                                                    |            |
|----|-----------|---|---|-----------------------------------|----------|-------|-------|------|------|-------|----------|-------|-------|------|------|-------|------|----------|----------------------------------------------------|------------|
| 12 | 5065215   | C | G | rs78614168                        | 4.75E-05 | 0.057 | 0.028 | 2.08 | 1.53 | -2.82 | 4.52E-01 | 0.052 | 0.061 | 0.84 | 0.65 | -1.09 | 1.27 | 3.85E-02 | KCNA1(dist=37793), KCNA5(dist=87870)               | intergenic |
| 8  | 6001215   | T | C | rs2552222;rs570077706             | 3.90E-01 | 0.122 | 0.136 | 0.89 | 0.74 | -1.07 | 4.57E-05 | 0.139 | 0.098 | 1.48 | 1.25 | -1.77 | 1.16 | 3.86E-02 | CSMD1(dist=1148887), LOC100287015(dist=259862)     | intergenic |
| 8  | 5417953   | T | C | rs102168884                       | 6.31E-05 | 0.022 | 0.048 | 0.45 | 0.31 | -0.66 | 2.85E-01 | 0.036 | 0.029 | 1.26 | 0.92 | -1.47 | 0.76 | 3.87E-02 | CSMD1(dist=565625), LOC100287015(dist=843124)      | intergenic |
| 3  | 63891106  | C | T | rs386661726;rs9850682;rs370104712 | 1.29E-01 | 0.186 | 0.211 | 0.85 | 0.73 | -1    | 1.33E-05 | 0.234 | 0.183 | 1.36 | 1.18 | -1.57 | 1.13 | 3.88E-02 | ATXN7                                              | intronic   |
| 3  | 63841395  | T | C | rs832188                          | 9.09E-02 | 0.194 | 0.219 | 1.17 | 1    | -1.36 | 8.08E-06 | 0.251 | 0.199 | 0.74 | 0.65 | -0.85 | 0.89 | 3.88E-02 | THOC7                                              | intronic   |
| 6  | 16411094  | G | A | rs111964724                       | 5.07E-01 | 0.047 | 0.055 | 0.83 | 0.63 | -1.11 | 5.41E-05 | 0.062 | 0.039 | 1.61 | 1.25 | -2.08 | 1.28 | 3.89E-02 | ATXN1                                              | intronic   |
| 11 | 104500178 | A | G | rs2187132                         | 2.45E-01 | 0.302 | 0.287 | 1.08 | 0.94 | -1.23 | 6.14E-05 | 0.241 | 0.289 | 0.78 | 0.68 | -0.9  | 0.90 | 3.89E-02 | LOC102723895(dist=20148), CASP12(dist=256267)      | intergenic |
| 12 | 101225751 | G | A | rs7305626                         | 5.69E-05 | 0.075 | 0.048 | 1.62 | 1.26 | -2.09 | 3.84E-01 | 0.055 | 0.057 | 0.96 | 0.74 | -1.24 | 1.22 | 3.90E-02 | ANO4                                               | intronic   |
| 7  | 95636259  | C | T | rs319316                          | 5.11E-01 | 0.034 | 0.038 | 0.88 | 0.63 | -1.24 | 2.70E-05 | 0.043 | 0.025 | 1.75 | 1.29 | -2.38 | 1.35 | 3.90E-02 | DYNC11                                             | intronic   |
| 4  | 35974832  | A | G | rs1714085                         | 1.40E-05 | 0.190 | 0.140 | 0.70 | 0.59 | -0.82 | 2.45E-01 | 0.163 | 0.185 | 1.17 | 1    | -1.37 | 0.88 | 3.90E-02 | LOC101928622(dist=1933317), ARAP2(dist=92788)      | intergenic |
| 17 | 64438011  | C | A | rs1005661                         | 2.59E-01 | 0.298 | 0.315 | 1.08 | 0.95 | -1.24 | 1.45E-05 | 0.350 | 0.295 | 0.78 | 0.69 | -0.88 | 0.90 | 3.90E-02 | PRKCA                                              | intronic   |
| 14 | 70290758  | A | G | rs2094272                         | 5.35E-05 | 0.268 | 0.323 | 0.76 | 0.67 | -0.88 | 2.68E-01 | 0.314 | 0.299 | 1.07 | 0.95 | -1.22 | 0.90 | 3.91E-02 | SLC10A1(dist=26752), SMOCC1(dist=55356)            | intergenic |
| 1  | 104472651 | A | C | rs12142090                        | 1.31E-01 | 0.259 | 0.278 | 0.91 | 0.79 | -1.04 | 7.42E-06 | 0.330 | 0.274 | 1.31 | 1.15 | -1.48 | 1.11 | 3.92E-02 | AMY1A(dist=171340), LOC100129138(dist=142994)      | intergenic |
| 12 | 44279551  | A | G | rs76035338                        | 1.60E-01 | 0.039 | 0.049 | 0.78 | 0.57 | -1.06 | 3.53E-05 | 0.069 | 0.041 | 1.74 | 1.37 | -2.22 | 1.25 | 3.94E-02 | TMEM117                                            | intronic   |
| 12 | 44274116  | A | C | rs80213194                        | 1.45E-01 | 0.039 | 0.050 | 0.77 | 0.57 | -1.05 | 3.06E-05 | 0.070 | 0.041 | 1.76 | 1.38 | -2.24 | 1.25 | 3.95E-02 | TMEM117                                            | intronic   |
| 14 | 105079467 | T | C | rs10137691                        | 1.91E-01 | 0.122 | 0.135 | 1.12 | 0.93 | -1.35 | 4.62E-05 | 0.167 | 0.126 | 0.72 | 0.61 | -0.85 | 0.87 | 3.95E-02 | TMEM179(dist=8370), MIR4710(dist=64564)            | intergenic |
| 10 | 33355363  | C | T | rs12358710                        | 4.02E-05 | 0.046 | 0.021 | 2.21 | 1.56 | -3.12 | 7.51E-01 | 0.034 | 0.039 | 0.87 | 0.63 | -1.19 | 1.32 | 3.96E-02 | ITGB1(dist=108070), NRP1(dist=111056)              | intergenic |
| 8  | 66275729  | G | A | rs12548382                        | 2.71E-01 | 0.196 | 0.181 | 1.10 | 0.94 | -1.29 | 5.74E-05 | 0.144 | 0.187 | 0.73 | 0.62 | -0.86 | 0.88 | 3.96E-02 | LINC00251(dist=183154), LINC01299(dist=163514)     | intergenic |
| 2  | 35310501  | T | G | rs4143762                         | 5.20E-05 | 0.280 | 0.322 | 0.82 | 0.71 | -0.94 | 3.15E-01 | 0.367 | 0.374 | 0.97 | 0.86 | -1.1  | 0.90 | 3.97E-02 | LINC01320(dist=362871), LOC100288911(dist=1271391) | intergenic |
| 12 | 5071462   | G | A | rs56294936                        | 5.82E-05 | 0.060 | 0.031 | 1.99 | 1.48 | -2.67 | 4.71E-01 | 0.058 | 0.068 | 0.86 | 0.67 | -1.1  | 1.26 | 3.99E-02 | KCNA1(dist=44040), KCNA5(dist=81623)               | intergenic |
| 4  | 35982726  | C | T | rs6833640                         | 3.29E-05 | 0.425 | 0.364 | 1.29 | 1.13 | -1.46 | 2.74E-01 | 0.380 | 0.400 | 0.92 | 0.81 | -1.04 | 1.10 | 4.00E-02 | LOC101928622(dist=1941211), ARAP2(dist=84894)      | intergenic |
| 14 | 105066885 | T | C | rs7142224                         | 1.45E-01 | 0.120 | 0.134 | 1.14 | 0.94 | -1.37 | 2.21E-05 | 0.165 | 0.123 | 0.71 | 0.61 | -0.84 | 0.87 | 4.00E-02 | TMEM179                                            | intronic   |
| 14 | 105290070 | A | G | rs11160820                        | 1.44E-01 | 0.502 | 0.468 | 0.87 | 0.77 | -0.99 | 1.78E-05 | 0.441 | 0.511 | 1.33 | 1.18 | -1.49 | 1.11 | 4.01E-02 | LINC00638                                          | downstream |
| 12 | 44203456  | T | A | rs76268269                        | 1.49E-01 | 0.039 | 0.049 | 0.77 | 0.57 | -1.05 | 3.71E-05 | 0.069 | 0.041 | 1.74 | 1.37 | -2.22 | 1.25 | 4.06E-02 | TWFF1(dist=3278), TMEM117(dist=26208)              | intergenic |
| 2  | 35308462  | C | T | rs12471763                        | 5.02E-05 | 0.281 | 0.324 | 0.82 | 0.71 | -0.94 | 3.04E-01 | 0.368 | 0.374 | 0.97 | 0.86 | -1.1  | 0.90 | 4.07E-02 | LINC01320(dist=360832), LOC100288911(dist=1273430) | intergenic |
| 8  | 5411879   | G | C | rs75243017                        | 5.19E-05 | 0.021 | 0.047 | 0.44 | 0.3  | -0.66 | 2.88E-01 | 0.036 | 0.029 | 1.26 | 0.91 | -1.73 | 0.76 | 4.10E-02 | CSMD1(dist=559551), LOC100287015(dist=849198)      | intergenic |
| 8  | 5411878   | T | C | rs76833675                        | 5.21E-05 | 0.021 | 0.047 | 0.44 | 0.3  | -0.66 | 2.88E-01 | 0.036 | 0.029 | 1.26 | 0.91 | -1.73 | 0.76 | 4.10E-02 | CSMD1(dist=559550), LOC100287015(dist=849199)      | intergenic |
| 8  | 66285264  | T | C | rs7817768                         | 2.59E-01 | 0.191 | 0.175 | 1.11 | 0.95 | -1.31 | 5.22E-05 | 0.137 | 0.180 | 0.72 | 0.61 | -0.85 | 0.88 | 4.11E-02 | LINC00251(dist=192689), LINC01299(dist=153979)     | intergenic |
| 3  | 63865947  | C | T | rs704374                          | 6.70E-02 | 0.184 | 0.212 | 1.19 | 1.02 | -1.4  | 3.97E-06 | 0.241 | 0.188 | 0.73 | 0.63 | -0.84 | 0.89 | 4.12E-02 | ATXN7                                              | intronic   |
| 11 | 8537159   | G | T | rs11041955                        | 2.77E-01 | 0.238 | 0.259 | 0.89 | 0.77 | -1.03 | 5.89E-05 | 0.284 | 0.233 | 1.31 | 1.15 | -1.49 | 1.11 | 4.12E-02 | STK33                                              | intronic   |
| 2  | 35309795  | G | A | rs2178676                         | 5.34E-05 | 0.280 | 0.322 | 0.82 | 0.71 | -0.94 | 3.06E-01 | 0.367 | 0.373 | 0.97 | 0.86 | -1.1  | 0.90 | 4.14E-02 | LINC01320(dist=362165), LOC100288911(dist=1272097) | intergenic |
| 8  | 66284268  | A | G | rs28795725                        | 2.56E-01 | 0.191 | 0.174 | 1.11 | 0.95 | -1.31 | 5.20E-05 | 0.137 | 0.180 | 0.72 | 0.61 | -0.85 | 0.88 | 4.15E-02 | LINC00251(dist=191693), LINC01299(dist=154975)     | intergenic |
| 3  | 63865531  | A | G | rs832199                          | 6.74E-02 | 0.184 | 0.212 | 1.19 | 1.02 | -1.39 | 4.13E-06 | 0.242 | 0.188 | 0.73 | 0.63 | -0.84 | 0.89 | 4.16E-02 | ATXN7                                              | intronic   |
| 4  | 35988329  | G | T | rs13139794                        | 2.99E-05 | 0.429 | 0.368 | 1.29 | 1.14 | -1.47 | 2.50E-01 | 0.383 | 0.404 | 0.91 | 0.81 | -1.03 | 1.10 | 4.17E-02 | LOC101928622(dist=1946814), ARAP2(dist=79291)      | intergenic |
| 8  | 66283704  | C | T | rs10957346                        | 2.54E-01 | 0.191 | 0.174 | 1.11 | 0.95 | -1.31 | 5.20E-05 | 0.137 | 0.180 | 0.72 | 0.61 | -0.85 | 0.88 | 4.17E-02 | LINC00251(dist=191129), LINC01299(dist=155539)     | intergenic |
| 12 | 44277006  | A | G | rs17093833                        | 1.35E-01 | 0.039 | 0.050 | 0.77 | 0.56 | -1.05 | 3.01E-05 | 0.070 | 0.041 | 1.76 | 1.38 | -2.24 | 1.25 | 4.18E-02 | TMEM117                                            | intronic   |
| 12 | 101234855 | A | G | rs76630074                        | 5.47E-05 | 0.075 | 0.048 | 1.62 | 1.26 | -2.09 | 3.57E-01 | 0.054 | 0.057 | 0.95 | 0.74 | -1.23 | 1.22 | 4.20E-02 | ANO4                                               | intronic   |
| 14 | 105069485 | T | C | rs10145420                        | 1.30E-01 | 0.118 | 0.132 | 1.14 | 0.95 | -1.38 | 1.95E-05 | 0.165 | 0.123 | 0.71 | 0.6  | -0.84 | 0.87 | 4.22E-02 | TMEM179                                            | intronic   |
| 8  | 66282815  | G | T | rs12681659                        | 2.52E-01 | 0.190 | 0.174 | 1.12 | 0.95 | -1.31 | 5.36E-05 | 0.137 | 0.180 | 0.72 | 0.61 | -0.85 | 0.88 | 4.24E-02 | LINC00251(dist=190240), LINC01299(dist=156428)     | intergenic |
| 17 | 64440111  | G | C | rs990084                          | 3.05E-01 | 0.306 | 0.322 | 1.08 | 0.94 | -1.23 | 4.41E-05 | 0.368 | 0.312 | 0.78 | 0.69 | -0.88 | 0.91 | 4.25E-02 | PRKCA                                              | intronic   |
| 12 | 44215008  | A | G | rs77989631                        | 1.58E-01 | 0.039 | 0.050 | 0.78 | 0.57 | -1.06 | 4.73E-05 | 0.069 | 0.041 | 1.73 | 1.36 | -2.21 | 1.25 | 4.27E-02 | TWFF1(dist=14830), TMEM117(dist=14656)             | intergenic |
| 12 | 44231647  | A | G | rs75567241                        | 1.60E-01 | 0.039 | 0.050 | 0.78 | 0.57 | -1.06 | 4.83E-05 | 0.069 | 0.041 | 1.73 | 1.36 | -2.21 | 1.24 | 4.28E-02 | TMEM117                                            | intronic   |
| 17 | 64441885  | C | A | rs228889                          | 3.07E-01 | 0.306 | 0.322 | 1.08 | 0.94 | -1.23 | 4.73E-05 | 0.369 | 0.313 | 0.78 | 0.69 | -0.88 | 0.91 | 4.28E-02 | PRKCA                                              | intronic   |
| 12 | 44214804  | A | G | rs187596118                       | 1.57E-01 | 0.039 | 0.050 | 0.78 | 0.57 | -1.06 | 4.76E-05 | 0.069 | 0.041 | 1.73 | 1.36 | -2.21 | 1.25 | 4.32E-02 | TWFF1(dist=14626), TMEM117(dist=14860)             | intergenic |
| 4  | 35980932  | A | C | rs6833137                         | 2.86E-05 | 0.429 | 0.368 | 1.29 | 1.14 | -1.46 | 2.38E-01 | 0.383 | 0.404 | 0.91 | 0.81 | -1.03 | 1.10 | 4.35E-02 | LOC101928622(dist=1939417), ARAP2(dist=86688)      | intergenic |
| 4  | 35984653  | C | T | rs6847221                         | 3.10E-05 | 0.427 | 0.366 | 1.29 | 1.14 | -1.46 | 2.46E-01 | 0.381 | 0.402 | 0.91 | 0.81 | -1.03 | 1.10 | 4.36E-02 | LOC101928622(dist=1943138), ARAP2(dist=82967)      | intergenic |
| 2  | 144299242 | T | C | rs4278879                         | 3.09E-01 | 0.279 | 0.289 | 1.05 | 0.92 | -1.21 | 1.71E-05 | 0.280 | 0.237 | 0.80 | 0.7  | -0.91 | 0.88 | 4.36E-02 | ARHGAP15                                           | intronic   |
| 19 | 36843700  | G | A | rs190818975                       | 1.78E-02 | 0.012 | 0.021 | 0.57 | 0.34 | -0.97 | 2.73E-05 | 0.040 | 0.024 | 1.70 | 1.24 | -2.33 | 1.49 | 4.38E-02 | ZFP14                                              | intronic   |
| 4  | 35991994  | C | T | rs10025873                        | 3.06E-05 | 0.428 | 0.367 | 1.29 | 1.14 | -1.47 | 2.35E-01 | 0.381 | 0.403 | 0.91 | 0.81 | -1.03 | 1.10 | 4.38E-02 | LOC101928622(dist=1950479), ARAP2(dist=75626)      | intergenic |
| 10 | 33362132  | C | A | rs10827179                        | 5.68E-05 | 0.046 | 0.021 | 2.27 | 1.61 | -3.2  | 7.30E-01 | 0.037 | 0.042 | 0.87 | 0.64 | -1.19 | 1.30 | 4.39E-02 | ITGB1(dist=114839), NRP1(dist=104287)              | intergenic |
| 8  | 66279178  | A | T | rs10091153                        | 2.41E-01 | 0.190 | 0.174 | 1.12 | 0.95 | -1.31 | 5.38E-05 | 0.137 | 0.180 | 0.72 | 0.61 | -0.85 | 0.88 | 4.41E-02 | LINC00251(dist=186603), LINC01299(dist=160065)     | intergenic |
| 11 | 21566468  | T | A | rs10833563                        | 2.34E-01 | 0.184 | 0.155 | 1.23 | 1.04 | -1.44 | 5.17E-05 | 0.137 | 0.195 | 0.65 | 0.55 | -0.77 | 0.88 | 4.42E-02 | NELL1                                              | intronic   |
| 12 | 47564296  | G | A | rs373566286;rs141340005           | 5.51E-05 | 0.041 | 0.068 | 0.58 | 0.43 | -0.78 | 2.38E-01 | 0.066 | 0.056 | 1.18 | 0.93 | -1.5  | 0.80 | 4.42E-02 | PCED1B                                             | intronic   |
| 12 | 5079248   | C | T | rs78561728                        | 3.10E-05 | 0.067 | 0.037 | 1.89 | 1.43 | -2.5  | 3.10E-01 | 0.051 | 0.062 | 0.82 | 0.63 | -1.06 | 1.26 | 4.42E-02 | KCNA1(dist=51826), KCNA5(dist=73837)               | intergenic |
| 8  | 62661804  | C | T | rs60736029                        | 3.69E-01 | 0.047 | 0.057 | 0.82 | 0.61 | -1.08 | 5.89E-05 | 0.064 | 0.040 | 1.64 | 1.28 | -2.11 | 1.26 | 4.43E-02 | MIR4470(dist=34386), NKAIN3(dist=499697)           | intergenic |
| 3  | 63790670  | A | C | rs2637985                         | 1.11E-01 | 0.197 | 0.221 | 1.16 | 0.99 | -1.35 | 1.02E-05 | 0.253 | 0.203 | 0.75 | 0.66 | -0.87 | 0.8  |          |                                                    |            |

|    |           |   |   |                       |          |       |       |      |      |       |          |       |       |      |      |       |      |          |                                                    |                |
|----|-----------|---|---|-----------------------|----------|-------|-------|------|------|-------|----------|-------|-------|------|------|-------|------|----------|----------------------------------------------------|----------------|
| 18 | 10266295  | G | A | rs12955786            | 5.68E-05 | 0.105 | 0.066 | 1.67 | 1.34 | -2.07 | 3.95E-01 | 0.085 | 0.099 | 0.85 | 0.69 | -1.04 | 1.17 | 4.57E-02 | VAPA(dist=306277), LINC01254(dist=138835)          | intergenic     |
| 4  | 35980617  | A | T | rs544205688;rs9990796 | 4.99E-05 | 0.408 | 0.350 | 1.28 | 1.13 | -1.45 | 2.84E-01 | 0.369 | 0.390 | 0.92 | 0.81 | -1.03 | 1.10 | 4.58E-02 | LOC101928622(dist=1939102), ARAP2(dist=87003)      | intergenic     |
| 10 | 33357713  | T | C | rs12355459            | 4.34E-05 | 0.046 | 0.021 | 2.25 | 1.59 | -3.17 | 6.80E-01 | 0.034 | 0.039 | 0.85 | 0.62 | -1.17 | 1.31 | 4.58E-02 | ITGB1(dist=110420), NRP1(dist=108706)              | intergenic     |
| 6  | 114380745 | A | C | rs12196433            | 1.54E-01 | 0.453 | 0.420 | 0.87 | 0.77 | -0.99 | 2.37E-05 | 0.376 | 0.448 | 1.34 | 1.19 | -1.51 | 1.10 | 4.60E-02 | LOC101927768                                       | ncRNA_intronic |
| 11 | 104475535 | G | T | rs11226441            | 1.83E-01 | 0.297 | 0.279 | 1.09 | 0.95 | -1.25 | 4.83E-05 | 0.234 | 0.282 | 0.78 | 0.68 | -0.89 | 0.90 | 4.64E-02 | LOC102723895                                       | ncRNA_intronic |
| 8  | 1749333   | C | T | rs75404472            | 4.64E-06 | 0.110 | 0.162 | 0.64 | 0.53 | -0.77 | 4.71E-02 | 0.137 | 0.112 | 1.25 | 1.05 | -1.49 | 0.87 | 4.64E-02 | MIR3674                                            | ncRNA_exonic   |
| 5  | 165788953 | G | A | rs72809717            | 1.83E-05 | 0.044 | 0.021 | 2.15 | 1.52 | -3.05 | 2.46E-01 | 0.031 | 0.040 | 0.76 | 0.54 | -1.06 | 1.33 | 4.66E-02 | LOC102546299(dist=1818964), CTB-7E3.1(dist=543274) | intergenic     |
| 8  | 66276066  | G | A | rs9298100             | 2.23E-01 | 0.186 | 0.168 | 1.13 | 0.96 | -1.32 | 5.72E-05 | 0.132 | 0.175 | 0.72 | 0.61 | -0.85 | 0.88 | 4.67E-02 | LINC00251(dist=183491), LINC01299(dist=163177)     | intergenic     |
| 8  | 5371040   | G | T | rs28375685            | 4.85E-05 | 0.020 | 0.047 | 0.42 | 0.28 | -0.62 | 2.16E-01 | 0.038 | 0.030 | 1.27 | 0.93 | -1.74 | 0.77 | 4.69E-02 | CSMD1(dist=518712), LOC100287015(dist=890037)      | intergenic     |
| 8  | 66278139  | G | A | rs10087366            | 2.39E-01 | 0.190 | 0.174 | 1.12 | 0.95 | -1.31 | 6.25E-05 | 0.138 | 0.181 | 0.73 | 0.62 | -0.86 | 0.88 | 4.71E-02 | LINC00251(dist=185564), LINC01299(dist=161104)     | intergenic     |
| 3  | 63827381  | G | A | rs13059603            | 1.65E-01 | 0.209 | 0.229 | 1.12 | 0.97 | -1.31 | 2.54E-05 | 0.265 | 0.220 | 0.78 | 0.68 | -0.89 | 0.90 | 4.72E-02 | C3orf49                                            | ncRNA_intronic |
| 12 | 5068232   | G | A | rs79431781            | 6.48E-05 | 0.058 | 0.029 | 2.02 | 1.49 | -2.73 | 4.35E-01 | 0.053 | 0.063 | 0.84 | 0.65 | -1.09 | 1.26 | 4.73E-02 | KCNA1(dist=40810), KCNA5(dist=84853)               | intergenic     |
| 3  | 63841942  | T | C | rs832189              | 7.78E-02 | 0.209 | 0.236 | 1.17 | 1.01 | -1.36 | 9.53E-06 | 0.267 | 0.214 | 0.75 | 0.65 | -0.85 | 0.90 | 4.74E-02 | THOC7                                              | intronic       |
| 2  | 222392928 | T | C | rs76250216            | 2.47E-01 | 0.035 | 0.042 | 0.81 | 0.58 | -1.12 | 3.66E-06 | 0.050 | 0.031 | 1.67 | 1.26 | -2.22 | 1.36 | 4.74E-02 | EPHA4                                              | intronic       |
| 12 | 5063504   | G | A | rs76364502            | 3.62E-05 | 0.057 | 0.028 | 2.08 | 1.53 | -2.83 | 3.61E-01 | 0.050 | 0.060 | 0.83 | 0.63 | -1.08 | 1.26 | 4.75E-02 | KCNA1(dist=36082), KCNA5(dist=89581)               | intergenic     |
| 8  | 1748721   | C | T | rs7844854             | 5.70E-06 | 0.107 | 0.158 | 0.64 | 0.53 | -0.77 | 5.53E-02 | 0.134 | 0.110 | 1.25 | 1.05 | -1.48 | 0.86 | 4.76E-02 | MIR3674                                            | upstream       |
| 10 | 33361179  | T | C | rs2891368             | 6.10E-05 | 0.046 | 0.021 | 2.25 | 1.6  | -3.18 | 7.10E-01 | 0.036 | 0.042 | 0.87 | 0.64 | -1.18 | 1.29 | 4.79E-02 | ITGB1(dist=113886), NRP1(dist=105240)              | intergenic     |
| 12 | 5077421   | G | A | rs7303163             | 2.40E-05 | 0.058 | 0.028 | 2.12 | 1.56 | -2.87 | 3.04E-01 | 0.053 | 0.063 | 0.82 | 0.63 | -1.06 | 1.26 | 4.80E-02 | KCNA1(dist=49999), KCNA5(dist=75664)               | intergenic     |
| 10 | 33361185  | T | A | rs2383980             | 6.11E-05 | 0.046 | 0.021 | 2.25 | 1.6  | -3.18 | 7.10E-01 | 0.036 | 0.042 | 0.87 | 0.64 | -1.18 | 1.29 | 4.80E-02 | ITGB1(dist=113892), NRP1(dist=105234)              | intergenic     |
| 4  | 35992101  | A | G | rs9992603             | 3.56E-05 | 0.430 | 0.370 | 1.28 | 1.13 | -1.46 | 2.40E-01 | 0.383 | 0.404 | 0.91 | 0.81 | -1.03 | 1.09 | 4.80E-02 | LOC101928622(dist=1950586), ARAP2(dist=75519)      | intergenic     |
| 2  | 69893509  | A | G | rs72899459            | 3.92E-05 | 0.099 | 0.069 | 1.48 | 1.19 | -1.85 | 2.40E-01 | 0.068 | 0.075 | 0.90 | 0.72 | -1.14 | 1.19 | 4.83E-02 | AANK1(dist=22532), ANXA4(dist=75618)               | intergenic     |
| 8  | 66276210  | G | T | rs9298101             | 2.16E-01 | 0.185 | 0.167 | 1.13 | 0.96 | -1.33 | 5.79E-05 | 0.129 | 0.172 | 0.71 | 0.6  | -0.85 | 0.88 | 4.85E-02 | LINC00251(dist=183635), LINC01299(dist=163033)     | intergenic     |
| 2  | 208207317 | A | G | rs6710342             | 2.07E-01 | 0.120 | 0.100 | 1.23 | 1.01 | -1.49 | 4.48E-05 | 0.081 | 0.123 | 0.63 | 0.51 | -0.78 | 0.86 | 4.87E-02 | MIR1302-4(dist=73169), CREB1(dist=187299)          | intergenic     |
| 8  | 5966496   | C | G | rs73660526            | 9.57E-02 | 0.219 | 0.255 | 0.82 | 0.71 | -0.95 | 5.88E-06 | 0.266 | 0.203 | 1.42 | 1.24 | -1.63 | 1.12 | 4.89E-02 | CSMD1(dist=1114168), LOC100287015(dist=294581)     | intergenic     |
| 5  | 6257960   | G | T | rs72714334            | 2.98E-01 | 0.113 | 0.123 | 0.91 | 0.75 | -1.1  | 5.99E-05 | 0.148 | 0.117 | 1.32 | 1.11 | -1.56 | 1.17 | 4.89E-02 | ICE1(dist=767613), FLJ33360(dist=52594)            | intergenic     |
| 12 | 5063188   | G | T | rs974447              | 3.63E-05 | 0.057 | 0.028 | 2.08 | 1.53 | -2.82 | 3.55E-01 | 0.050 | 0.060 | 0.82 | 0.63 | -1.07 | 1.26 | 4.89E-02 | KCNA1(dist=35766), KCNA5(dist=89897)               | intergenic     |
| 9  | 94448572  | A | G | rs10992047            | 5.43E-05 | 0.361 | 0.418 | 0.79 | 0.69 | -0.89 | 2.16E-01 | 0.413 | 0.404 | 1.04 | 0.92 | -1.17 | 0.91 | 4.95E-02 | MIR3910-1(dist=49929), ROR2(dist=36306)            | intergenic     |
| 8  | 1748529   | A | G | rs78403745            | 6.32E-06 | 0.107 | 0.157 | 0.64 | 0.53 | -0.78 | 5.55E-02 | 0.134 | 0.110 | 1.25 | 1.05 | -1.48 | 0.87 | 4.95E-02 | MIR3674                                            | upstream       |
| 8  | 5377029   | A | G | rs10100358            | 4.26E-05 | 0.020 | 0.047 | 0.41 | 0.27 | -0.61 | 1.79E-01 | 0.037 | 0.029 | 1.29 | 0.94 | -1.78 | 0.77 | 4.96E-02 | CSMD1(dist=524701), LOC100287015(dist=884048)      | intergenic     |
| 4  | 139708828 | A | G | rs72941666            | 1.21E-05 | 0.091 | 0.062 | 1.52 | 1.21 | -1.92 | 9.36E-02 | 0.054 | 0.062 | 0.87 | 0.67 | -1.12 | 1.22 | 4.96E-02 | LINC00499(dist=363330), CCRN4L(dist=228085)        | intergenic     |
| 4  | 122548144 | G | A | rs35294008            | 1.14E-01 | 0.327 | 0.304 | 1.11 | 0.97 | -1.27 | 2.17E-05 | 0.269 | 0.326 | 0.76 | 0.67 | -0.87 | 0.91 | 4.98E-02 | QRFPR(dist=245963), ANXA5(dist=41008)              | intergenic     |
| 2  | 54557481  | C | T | rs1727529             | 1.77E-01 | 0.132 | 0.131 | 1.01 | 0.84 | -1.22 | 2.90E-05 | 0.161 | 0.132 | 1.26 | 1.07 | -1.48 | 1.15 | 4.99E-02 | C2orf73                                            | upstream       |
| 17 | 15905952  | C | T | rs8076538             | 3.27E-01 | 0.402 | 0.401 | 1.01 | 0.89 | -1.14 | 4.78E-05 | 0.325 | 0.362 | 0.85 | 0.75 | -0.96 | 0.91 | 5.00E-02 | TTC19                                              | intronic       |
| 10 | 30777238  | T | C | rs17229476            | 6.42E-05 | 0.143 | 0.093 | 1.63 | 1.35 | -1.97 | 5.99E-01 | 0.132 | 0.150 | 0.86 | 0.73 | -1.02 | 1.19 | 5.03E-02 | MAP3K8(dist=26476), LYZL2(dist=123470)             | intergenic     |
| 10 | 36578032  | G | T | rs1219622             | 4.16E-05 | 0.164 | 0.105 | 1.68 | 1.41 | -2.01 | 5.52E-01 | 0.160 | 0.176 | 0.89 | 0.76 | -1.04 | 1.16 | 5.04E-02 | LINC01452(dist=488184), ANKRD30A(dist=836753)      | intergenic     |
| 12 | 5062786   | G | A | rs77487155            | 3.90E-05 | 0.057 | 0.028 | 2.06 | 1.52 | -2.8  | 3.56E-01 | 0.050 | 0.060 | 0.83 | 0.63 | -1.08 | 1.26 | 5.06E-02 | KCNA1(dist=35364), KCNA5(dist=90299)               | intergenic     |
| 2  | 54539096  | A | G | rs843643              | 1.80E-01 | 0.112 | 0.113 | 0.99 | 0.81 | -1.2  | 2.67E-05 | 0.141 | 0.113 | 1.29 | 1.08 | -1.53 | 1.16 | 5.07E-02 | ACYP2(dist=6661), C2orf73(dist=18975)              | intergenic     |
| 2  | 208206813 | C | G | rs6738474             | 1.89E-01 | 0.118 | 0.098 | 1.23 | 1.01 | -1.5  | 4.01E-05 | 0.081 | 0.123 | 0.63 | 0.51 | -0.78 | 0.86 | 5.13E-02 | MIR1302-4(dist=72665), CREB1(dist=187803)          | intergenic     |
| 5  | 117887195 | A | G | rs13172875            | 1.10E-01 | 0.426 | 0.389 | 0.86 | 0.76 | -0.97 | 1.11E-05 | 0.353 | 0.430 | 1.38 | 1.22 | -1.56 | 1.10 | 5.19E-02 | LOC101927280                                       | ncRNA_intronic |
| 5  | 117887009 | G | A | rs12210928            | 1.10E-01 | 0.426 | 0.389 | 0.86 | 0.76 | -0.97 | 1.13E-05 | 0.353 | 0.430 | 1.38 | 1.22 | -1.56 | 1.10 | 5.22E-02 | LOC101927280                                       | ncRNA_intronic |
| 3  | 63781484  | T | C | rs2201103             | 1.01E-01 | 0.194 | 0.218 | 1.16 | 0.99 | -1.35 | 1.46E-05 | 0.242 | 0.195 | 0.76 | 0.66 | -0.87 | 0.89 | 5.24E-02 | SNTN(dist=130593), C3orf49(dist=23557)             | intergenic     |
| 3  | 63788094  | A | G | rs4688424             | 1.02E-01 | 0.195 | 0.220 | 1.16 | 1    | -1.36 | 1.54E-05 | 0.251 | 0.203 | 0.76 | 0.66 | -0.87 | 0.90 | 5.27E-02 | SNTN(dist=137203), C3orf49(dist=16947)             | intergenic     |
| 8  | 5369487   | A | G | rs10090070            | 5.07E-05 | 0.020 | 0.047 | 0.42 | 0.28 | -0.62 | 1.93E-01 | 0.038 | 0.030 | 1.28 | 0.93 | -1.75 | 0.78 | 5.28E-02 | CSMD1(dist=517159), LOC100287015(dist=891590)      | intergenic     |
| 2  | 208207199 | T | C | rs6754129             | 1.91E-01 | 0.118 | 0.098 | 1.23 | 1.01 | -1.5  | 4.46E-05 | 0.081 | 0.123 | 0.63 | 0.51 | -0.78 | 0.86 | 5.32E-02 | MIR1302-4(dist=73051), CREB1(dist=187417)          | intergenic     |
| 8  | 5366120   | C | G | rs115690804           | 4.46E-05 | 0.020 | 0.046 | 0.41 | 0.28 | -0.62 | 1.67E-01 | 0.037 | 0.029 | 1.29 | 0.94 | -1.77 | 0.78 | 5.42E-02 | CSMD1(dist=513792), LOC100287015(dist=894957)      | intergenic     |
| 8  | 5366119   | A | T | rs114690256           | 4.46E-05 | 0.020 | 0.046 | 0.41 | 0.28 | -0.62 | 1.67E-01 | 0.037 | 0.029 | 1.29 | 0.94 | -1.77 | 0.78 | 5.42E-02 | CSMD1(dist=513791), LOC100287015(dist=894958)      | intergenic     |
| 19 | 16089701  | G | A | rs8105583             | 3.87E-05 | 0.403 | 0.349 | 1.26 | 1.11 | -1.43 | 1.10E-01 | 0.293 | 0.301 | 0.96 | 0.85 | -1.1  | 1.11 | 5.45E-02 | OR10H4(dist=28933), LINC00661(dist=36743)          | intergenic     |
| 10 | 22747294  | C | T | rs12260560            | 4.35E-05 | 0.053 | 0.089 | 0.57 | 0.44 | -0.74 | 3.63E-01 | 0.082 | 0.073 | 1.13 | 0.91 | -1.4  | 0.83 | 5.45E-02 | LOC100499489(dist=20436), PIP4K2A(dist=76472)      | intergenic     |
| 19 | 16089925  | C | T | rs8106771             | 4.32E-05 | 0.404 | 0.350 | 1.26 | 1.11 | -1.43 | 1.18E-01 | 0.294 | 0.301 | 0.97 | 0.85 | -1.1  | 1.11 | 5.45E-02 | OR10H4(dist=29157), LINC00661(dist=36519)          | intergenic     |
| 9  | 81722803  | G | A | rs151337013           | 2.13E-01 | 0.043 | 0.052 | 0.81 | 0.6  | -1.1  | 4.09E-05 | 0.064 | 0.043 | 1.54 | 1.2  | -1.97 | 1.28 | 5.48E-02 | PSAT1(dist=777794), LOC101927450(dist=27535)       | intergenic     |
| 19 | 16089275  | A | C | rs12609115            | 3.98E-05 | 0.402 | 0.348 | 1.26 | 1.11 | -1.43 | 1.12E-01 | 0.293 | 0.301 | 0.96 | 0.85 | -1.1  | 1.11 | 5.48E-02 | OR10H4(dist=28507), LINC00661(dist=37169)          | intergenic     |
| 3  | 2589835   | A | G | rs111717438           | 5.65E-02 | 0.392 | 0.363 | 1.13 | 0.99 | -1.28 | 4.14E-05 | 0.380 | 0.343 | 1.18 | 1.04 | -1.33 | 1.15 | 5.52E-02 | CNTN4                                              | intronic       |
| 19 | 16089127  | T | C | rs28735501            | 4.06E-05 | 0.402 | 0.348 | 1.26 | 1.11 | -1.43 | 1.12E-01 | 0.293 | 0.301 | 0.96 | 0.85 | -1.1  | 1.11 | 5.53E-02 | OR10H4(dist=28359), LINC00661(dist=37317)          | intergenic     |
| 17 | 5126768   | G | A | rs78015303            | 1.44E-01 | 0.074 | 0.083 | 0.88 | 0.7  | -1.11 | 8.00E-06 | 0.113 | 0.084 | 1.40 | 1.16 | -1.69 | 1.21 | 5.53E-02 | LOC100130950                                       | ncRNA_exonic   |
| 2  | 208173545 | A | G | rs16839586            | 9.75E-02 | 0.164 | 0.139 | 1.21 | 1.02 | -1.44 | 9.27E-06 | 0.104 | 0.152 | 0.65 | 0.54 | -0.78 | 0.88 | 5.54E-02 | MIR1302-4(dist=39397), CREB1(dist=221071)          | intergenic     |
| 19 | 160887    |   |   |                       |          |       |       |      |      |       |          |       |       |      |      |       |      |          |                                                    |                |

|    |           |   |   |                         |          |       |       |      |      |       |          |       |       |      |      |       |      |          |                                                   |                |
|----|-----------|---|---|-------------------------|----------|-------|-------|------|------|-------|----------|-------|-------|------|------|-------|------|----------|---------------------------------------------------|----------------|
| 6  | 37151081  | G | A | rs116421496             | 2.08E-01 | 0.030 | 0.040 | 0.74 | 0.52 | -1.04 | 2.65E-05 | 0.048 | 0.028 | 1.74 | 1.3  | -2.33 | 1.32 | 5.76E-02 | PIM1(dist=7877), TMEM217(dist=28873)              | intergenic     |
| 17 | 48295448  | C | G | rs12051652              | 6.09E-05 | 0.075 | 0.043 | 1.79 | 1.38 | -2.33 | 2.63E-01 | 0.074 | 0.086 | 0.85 | 0.68 | -1.06 | 1.22 | 5.81E-02 | LOC101927230(dist=2667), TMEM92(dist=53319)       | intergenic     |
| 8  | 127625650 | G | T | rs11786548              | 8.74E-02 | 0.023 | 0.027 | 0.84 | 0.56 | -1.25 | 4.95E-05 | 0.052 | 0.036 | 1.46 | 1.11 | -1.92 | 1.32 | 5.84E-02 | FAM84B(dist=54939), PCAT1(dist=399749)            | intergenic     |
| 2  | 208203060 | G | A | rs788670690;rs201951771 | 1.57E-01 | 0.120 | 0.099 | 1.24 | 1.02 | -1.51 | 4.19E-05 | 0.082 | 0.124 | 0.63 | 0.52 | -0.78 | 0.87 | 5.85E-02 | MIR1302-4(dist=68912), CREB1(dist=191556)         | intergenic     |
| 8  | 6014159   | T | C | rs2552264               | 2.02E-01 | 0.076 | 0.089 | 0.84 | 0.67 | -1.06 | 2.26E-05 | 0.105 | 0.071 | 1.52 | 1.25 | -1.86 | 1.19 | 5.86E-02 | CSMD1(dist=1161831), LOC100287015(dist=246918)    | intergenic     |
| 5  | 116385327 | T | G | rs140910946             | 2.46E-01 | 0.030 | 0.036 | 0.83 | 0.58 | -1.18 | 4.46E-05 | 0.050 | 0.032 | 1.57 | 1.19 | -2.08 | 1.36 | 5.90E-02 | LOC102467223(dist=287422), LINC00992(dist=365881) | intergenic     |
| 19 | 16089233  | G | A | rs12610474              | 4.86E-05 | 0.356 | 0.304 | 1.27 | 1.11 | -1.45 | 9.41E-02 | 0.259 | 0.268 | 0.95 | 0.84 | -1.09 | 1.11 | 5.94E-02 | OR10H4(dist=28465), LINC00661(dist=37211)         | intergenic     |
| 2  | 54551008  | C | T | rs1727533               | 1.96E-01 | 0.116 | 0.115 | 1.00 | 0.83 | -1.22 | 6.21E-05 | 0.143 | 0.116 | 1.26 | 1.07 | -1.5  | 1.15 | 5.97E-02 | ACYP2(dist=18573), C2orf73(dist=7063)             | intergenic     |
| 1  | 104474710 | G | A | rs34356428              | 6.49E-02 | 0.245 | 0.268 | 0.89 | 0.77 | -1.02 | 5.39E-06 | 0.322 | 0.266 | 1.31 | 1.15 | -1.49 | 1.10 | 6.01E-02 | AMY1A(dist=173399), LOC100129138(dist=140935)     | intergenic     |
| 10 | 51532528  | G | A | rs4630240               | 1.86E-06 | 0.121 | 0.071 | 1.80 | 1.46 | -2.22 | 2.11E-01 | 0.093 | 0.110 | 0.83 | 0.68 | -1.01 | 1.19 | 6.08E-02 | TIMM23B                                           | intronic       |
| 2  | 204730901 | T | C | rs11571315              | 1.06E-01 | 0.508 | 0.489 | 0.92 | 0.82 | -1.05 | 2.66E-05 | 0.453 | 0.509 | 1.26 | 1.12 | -1.41 | 1.09 | 6.10E-02 | CD28(dist=127265), CTLA4(dist=1610)               | intergenic     |
| 3  | 63878340  | G | A | rs372095772;rs704362    | 4.86E-02 | 0.208 | 0.239 | 1.19 | 1.03 | -1.39 | 6.27E-06 | 0.267 | 0.213 | 0.74 | 0.65 | -0.85 | 0.90 | 6.14E-02 | ATXN7                                             | intronic       |
| 2  | 208200424 | C | G | rs17201911              | 1.54E-01 | 0.121 | 0.099 | 1.24 | 1.02 | -1.51 | 4.68E-05 | 0.082 | 0.124 | 0.63 | 0.52 | -0.78 | 0.87 | 6.15E-02 | MIR1302-4(dist=66276), CREB1(dist=194192)         | intergenic     |
| 8  | 16357763  | T | C | rs78844957              | 4.59E-05 | 0.036 | 0.061 | 0.57 | 0.42 | -0.78 | 1.18E-01 | 0.050 | 0.041 | 1.24 | 0.94 | -1.62 | 0.80 | 6.25E-02 | MSR1(dist=307463), FGF20(dist=492571)             | intergenic     |
| 11 | 104420700 | G | A | rs60064090              | 1.26E-01 | 0.268 | 0.247 | 1.12 | 0.97 | -1.29 | 4.68E-05 | 0.204 | 0.252 | 0.76 | 0.66 | -0.88 | 0.91 | 6.33E-02 | MIR7641-1(dist=297321), LOC102723895(dist=18517)  | intergenic     |
| 12 | 5079155   | A | C | rs77941559              | 6.50E-05 | 0.056 | 0.028 | 2.08 | 1.52 | -2.83 | 3.10E-01 | 0.051 | 0.062 | 0.82 | 0.63 | -1.06 | 1.24 | 6.38E-02 | KCNA1(dist=51733), KCNA5(dist=73930)              | intergenic     |
| 5  | 117889038 | A | T | rs919467                | 1.49E-01 | 0.177 | 0.146 | 0.79 | 0.67 | -0.94 | 5.78E-05 | 0.133 | 0.192 | 1.55 | 1.31 | -1.84 | 1.13 | 6.38E-02 | LOC101927280                                      | ncRNA_intronic |
| 13 | 106154210 | T | A | rs778329                | 5.11E-02 | 0.123 | 0.133 | 0.91 | 0.75 | -1.09 | 1.12E-05 | 0.165 | 0.137 | 1.25 | 1.06 | -1.46 | 1.16 | 6.59E-02 | DAOA-AS1                                          | ncRNA_intronic |
| 2  | 172376961 | G | A | rs72884317              | 1.37E-01 | 0.023 | 0.023 | 0.98 | 0.65 | -1.49 | 3.93E-05 | 0.042 | 0.029 | 1.50 | 1.11 | -2.04 | 1.36 | 6.61E-02 | DCAF17(dist=35399), CYBRD1(dist=1796)             | intergenic     |
| 10 | 54917916  | T | G | rs10430535              | 2.51E-05 | 0.401 | 0.335 | 1.33 | 1.17 | -1.51 | 2.65E-01 | 0.347 | 0.366 | 0.92 | 0.81 | -1.04 | 1.10 | 6.66E-02 | MBL2(dist=386456), PCDH15(dist=644617)            | intergenic     |
| 16 | 75773584  | C | T | rs140193503             | 3.28E-05 | 0.074 | 0.049 | 1.53 | 1.19 | -1.98 | 1.32E-01 | 0.043 | 0.049 | 0.87 | 0.65 | -1.15 | 1.23 | 6.73E-02 | TERF2IP(dist=82243), CNTNAP4(dist=537592)         | intergenic     |
| 2  | 208169002 | T | C | rs74846006              | 8.69E-02 | 0.162 | 0.137 | 1.22 | 1.03 | -1.45 | 1.19E-05 | 0.104 | 0.152 | 0.65 | 0.54 | -0.78 | 0.89 | 6.74E-02 | MIR1302-4(dist=34854), CREB1(dist=225614)         | intergenic     |
| 7  | 106651787 | C | T | rs10234225              | 3.17E-05 | 0.185 | 0.144 | 1.35 | 1.14 | -1.59 | 1.48E-01 | 0.140 | 0.152 | 0.91 | 0.77 | -1.07 | 1.12 | 6.74E-02 | PIK3CG(dist=102364), PRKAR2B(dist=33391)          | intergenic     |
| 11 | 104436445 | C | T | rs11226428              | 9.42E-02 | 0.267 | 0.245 | 1.13 | 0.98 | -1.3  | 3.43E-05 | 0.203 | 0.252 | 0.76 | 0.66 | -0.87 | 0.91 | 6.85E-02 | MIR7641-1(dist=313066), LOC102723895(dist=2772)   | intergenic     |
| 19 | 22666774  | T | C | rs2905567               | 2.98E-01 | 0.025 | 0.032 | 0.75 | 0.51 | -1.11 | 3.79E-05 | 0.037 | 0.021 | 1.77 | 1.27 | -2.46 | 1.35 | 6.86E-02 | ZNF98(dist=61626), LOC101929124(dist=37023)       | intergenic     |
| 2  | 54544511  | A | G | rs843633                | 1.62E-01 | 0.111 | 0.114 | 0.98 | 0.81 | -1.19 | 4.73E-05 | 0.139 | 0.112 | 1.28 | 1.08 | -1.52 | 1.15 | 6.94E-02 | ACYP2(dist=12076), C2orf73(dist=13560)            | intergenic     |
| 18 | 6562910   | C | T | rs112397707             | 1.35E-01 | 0.113 | 0.133 | 0.83 | 0.69 | -1.01 | 2.38E-05 | 0.141 | 0.103 | 1.43 | 1.21 | -1.7  | 1.16 | 6.95E-02 | LINC01387                                         | ncRNA_intronic |
| 10 | 22751121  | G | T | rs75962181              | 5.48E-05 | 0.050 | 0.085 | 0.56 | 0.43 | -0.74 | 3.16E-01 | 0.079 | 0.070 | 1.14 | 0.92 | -1.42 | 0.84 | 7.07E-02 | LOC100499489(dist=24263), PIP4K2A(dist=72645)     | intergenic     |
| 1  | 104473412 | C | T | rs10881523              | 6.67E-02 | 0.278 | 0.304 | 0.88 | 0.77 | -1.01 | 8.62E-06 | 0.351 | 0.293 | 1.30 | 1.15 | -1.47 | 1.10 | 7.10E-02 | AMY1A(dist=172101), LOC100129138(dist=142233)     | intergenic     |
| 11 | 104424807 | A | G | rs11226426              | 8.76E-02 | 0.268 | 0.245 | 1.13 | 0.98 | -1.3  | 3.36E-05 | 0.203 | 0.252 | 0.76 | 0.66 | -0.87 | 0.91 | 7.16E-02 | MIR7641-1(dist=301428), LOC102723895(dist=14410)  | intergenic     |
| 19 | 22668153  | C | T | rs2905569               | 3.17E-01 | 0.025 | 0.032 | 0.75 | 0.51 | -1.11 | 5.51E-05 | 0.037 | 0.021 | 1.79 | 1.28 | -2.49 | 1.33 | 7.17E-02 | ZNF98(dist=63005), LOC101929124(dist=35644)       | intergenic     |
| 3  | 63804761  | T | C | rs9842724               | 7.74E-02 | 0.219 | 0.244 | 1.16 | 1    | -1.34 | 2.09E-05 | 0.274 | 0.225 | 0.77 | 0.67 | -0.88 | 0.91 | 7.21E-02 | C3orf49                                           | upstream       |
| 8  | 9641034   | A | G | rs17150478              | 5.19E-05 | 0.072 | 0.043 | 1.72 | 1.32 | -2.24 | 3.22E-01 | 0.052 | 0.065 | 0.79 | 0.61 | -1.02 | 1.23 | 7.22E-02 | TNKS(dist=1178), LINC00599(dist=116540)           | intergenic     |
| 1  | 104464676 | C | G | rs7524994               | 7.30E-02 | 0.250 | 0.273 | 0.89 | 0.77 | -1.02 | 1.18E-05 | 0.319 | 0.266 | 1.29 | 1.14 | -1.47 | 1.10 | 7.26E-02 | AMY1A(dist=163365), LOC100129138(dist=150969)     | intergenic     |
| 2  | 204721752 | T | C | rs1024161               | 1.06E-01 | 0.507 | 0.487 | 0.92 | 0.82 | -1.04 | 4.26E-05 | 0.449 | 0.504 | 1.25 | 1.11 | -1.4  | 1.09 | 7.27E-02 | CD28(dist=118116), CTLA4(dist=10759)              | intergenic     |
| 5  | 53739438  | T | C | rs7722771;rs386688056   | 2.25E-01 | 0.289 | 0.259 | 1.16 | 1.01 | -1.33 | 4.97E-05 | 0.282 | 0.345 | 0.74 | 0.65 | -0.85 | 0.91 | 7.28E-02 | LINC01033(dist=28483), HSPB3(dist=11993)          | intergenic     |
| 2  | 69873441  | A | G | rs72899439              | 2.01E-05 | 0.137 | 0.102 | 1.39 | 1.15 | -1.68 | 1.03E-01 | 0.098 | 0.106 | 0.91 | 0.75 | -1.11 | 1.14 | 7.35E-02 | AAK1(dist=2464), ANXA4(dist=95686)                | intergenic     |
| 7  | 113476939 | G | A | rs35514509              | 1.71E-01 | 0.263 | 0.289 | 0.88 | 0.77 | -1.01 | 4.85E-05 | 0.290 | 0.240 | 1.30 | 1.14 | -1.48 | 1.11 | 7.40E-02 | LINC00998(dist=718302), PPP1R3A(dist=39943)       | intergenic     |
| 12 | 44290804  | A | G | rs76196511              | 2.71E-01 | 0.042 | 0.050 | 0.82 | 0.61 | -1.11 | 3.79E-05 | 0.051 | 0.029 | 1.78 | 1.34 | -2.37 | 1.25 | 7.40E-02 | TMEM117                                           | intronic       |
| 2  | 208161240 | C | T | rs79856371              | 9.50E-02 | 0.163 | 0.138 | 1.21 | 1.02 | -1.44 | 1.70E-05 | 0.104 | 0.151 | 0.66 | 0.54 | -0.79 | 0.89 | 7.42E-02 | MIR1302-4(dist=27092), CREB1(dist=233376)         | intergenic     |
| 11 | 8504936   | G | T | rs2028881               | 1.22E-01 | 0.240 | 0.268 | 0.86 | 0.75 | -1    | 2.97E-05 | 0.290 | 0.237 | 1.31 | 1.15 | -1.49 | 1.10 | 7.57E-02 | STK33                                             | intronic       |
| 1  | 104473089 | T | C | rs11185336              | 5.40E-02 | 0.276 | 0.302 | 0.88 | 0.77 | -1.01 | 9.39E-06 | 0.351 | 0.294 | 1.30 | 1.15 | -1.47 | 1.09 | 7.66E-02 | AMY1A(dist=171778), LOC100129138(dist=142556)     | intergenic     |
| 11 | 104456146 | C | T | rs12361087              | 1.24E-01 | 0.297 | 0.277 | 1.11 | 0.96 | -1.27 | 5.34E-05 | 0.220 | 0.267 | 0.77 | 0.67 | -0.89 | 0.91 | 7.69E-02 | LOC102723895                                      | ncRNA_intronic |
| 10 | 32085338  | A | G | rs10508767              | 4.26E-05 | 0.138 | 0.195 | 0.66 | 0.56 | -0.79 | 3.20E-01 | 0.197 | 0.182 | 1.10 | 0.95 | -1.28 | 0.90 | 7.76E-02 | ZEB1(dist=266596), ARHGAP12(dist=8988)            | intergenic     |
| 11 | 2873600   | T | C | rs34336559              | 1.04E-01 | 0.279 | 0.298 | 0.91 | 0.79 | -1.05 | 4.42E-05 | 0.310 | 0.268 | 1.22 | 1.08 | -1.39 | 1.11 | 7.82E-02 | KCNQ1-AS1                                         | ncRNA_intronic |
| 10 | 32085509  | T | G | rs16932691              | 4.28E-05 | 0.138 | 0.195 | 0.66 | 0.56 | -0.79 | 3.18E-01 | 0.197 | 0.182 | 1.10 | 0.95 | -1.28 | 0.90 | 7.82E-02 | ZEB1(dist=266767), ARHGAP12(dist=8817)            | intergenic     |
| 8  | 6014872   | C | G | rs145096458             | 2.02E-01 | 0.076 | 0.088 | 0.84 | 0.67 | -1.06 | 2.64E-05 | 0.097 | 0.066 | 1.52 | 1.24 | -1.87 | 1.18 | 8.01E-02 | CSMD1(dist=1162544), LOC100287015(dist=246205)    | intergenic     |
| 1  | 238811303 | A | G | rs73106276              | 4.09E-01 | 0.054 | 0.064 | 0.83 | 0.64 | -1.09 | 3.40E-05 | 0.060 | 0.040 | 1.54 | 1.19 | -1.99 | 1.25 | 8.02E-02 | LINC01139(dist=161986), CHR3(dist=981070)         | intergenic     |
| 8  | 5949384   | T | C | rs10104205              | 5.45E-05 | 0.413 | 0.484 | 0.75 | 0.66 | -0.85 | 1.58E-01 | 0.456 | 0.429 | 1.12 | 0.99 | -1.25 | 0.92 | 8.07E-02 | CSMD1(dist=1097056), LOC100287015(dist=311693)    | intergenic     |
| 12 | 44042573  | C | T | rs74968837              | 5.29E-02 | 0.037 | 0.050 | 0.73 | 0.53 | -0.99 | 2.40E-05 | 0.062 | 0.036 | 1.79 | 1.39 | -2.32 | 1.23 | 8.24E-02 | ADAMTS20(dist=96849), PUS7L(dist=79837)           | intergenic     |
| 11 | 104445004 | T | C | rs59832858              | 1.14E-01 | 0.306 | 0.284 | 1.11 | 0.97 | -1.27 | 5.37E-05 | 0.229 | 0.276 | 0.78 | 0.68 | -0.89 | 0.92 | 8.31E-02 | LOC102723895                                      | ncRNA_intronic |
| 3  | 175307823 | G | A | rs9853586               | 3.98E-05 | 0.376 | 0.323 | 0.79 | 0.69 | -0.9  | 6.02E-02 | 0.326 | 0.345 | 1.09 | 0.96 | -1.24 | 0.90 | 8.59E-02 | NAALADL2                                          | intronic       |
| 8  | 1749241   | C | T | rs7845565               | 3.57E-05 | 0.097 | 0.141 | 0.65 | 0.53 | -0.79 | 6.45E-02 | 0.128 | 0.106 | 1.24 | 1.04 | -1.48 | 0.88 | 8.74E-02 | MIR3674                                           | upstream       |
| 5  | 53738494  | C | A | rs10940395              | 1.67E-01 | 0.276 | 0.245 | 1.18 | 1.02 | -1.35 | 4.25E-05 | 0.263 | 0.326 | 0.74 | 0.65 | -0.84 | 0.91 | 8.79E-02 | LINC01033(dist=27539), HSPB3(dist=12937)          | intergenic     |
| 17 | 32300379  | C | T | rs202018348;rs902560    | 2.39E-01 | 0.080 | 0.089 | 1.13 | 0.91 | -1.42 | 3.24E-05 | 0.106 | 0.075 | 0.69 | 0.57 | -0.84 | 0.86 | 8.81E-02 | ASIC2                                             | intronic       |
| 1  | 617       |   |   |                         |          |       |       |      |      |       |          |       |       |      |      |       |      |          |                                                   |                |

|    |           |   |   |                         |          |       |       |      |      |       |          |       |       |      |      |       |        |          |                                                 |                |
|----|-----------|---|---|-------------------------|----------|-------|-------|------|------|-------|----------|-------|-------|------|------|-------|--------|----------|-------------------------------------------------|----------------|
| 8  | 106598462 | A | G | rs72673756              | 4.81E-06 | 0.058 | 0.092 | 0.61 | 0.47 | -0.78 | 6.01E-02 | 0.100 | 0.090 | 1.12 | 0.92 | -1.37 | 0.87   | 9.42E-02 | ZFPM2                                           | intronic       |
| 8  | 634494    | C | G | rs336440                | 3.00E-05 | 0.024 | 0.051 | 0.46 | 0.32 | -0.67 | 1.54E-01 | 0.052 | 0.041 | 1.28 | 0.98 | -1.68 | 0.82   | 9.43E-02 | ERICH1                                          | intronic       |
| 2  | 56163875  | C | T | rs7563487               | 1.31E-01 | 0.174 | 0.179 | 1.04 | 0.88 | -1.22 | 3.67E-05 | 0.203 | 0.169 | 0.80 | 0.69 | -0.92 | 0.90   | 9.54E-02 | EFEMP1(dist=12577), MIR217HG(dist=26666)        | intergenic     |
| 10 | 32089877  | G | A | rs77107450              | 4.73E-05 | 0.138 | 0.194 | 0.66 | 0.56 | -0.79 | 2.76E-01 | 0.199 | 0.183 | 1.11 | 0.96 | -1.29 | 0.90   | 9.57E-02 | ZEB1(dist=271135), ARHGAP12(dist=4449)          | intergenic     |
| 8  | 5966427   | C | G | rs73660525              | 5.00E-02 | 0.203 | 0.241 | 0.80 | 0.69 | -0.93 | 1.21E-05 | 0.250 | 0.190 | 1.42 | 1.24 | -1.63 | 1.10   | 9.65E-02 | CSMD1(dist=1114099), LOC100287015(dist=294650)  | intergenic     |
| 10 | 31856588  | G | T | rs10740846              | 1.97E-05 | 0.153 | 0.094 | 0.58 | 0.48 | -0.69 | 1.95E-01 | 0.129 | 0.150 | 1.20 | 1.01 | -1.42 | 0.88   | 9.73E-02 | ZEB1(dist=37846), ARHGAP12(dist=237738)         | intergenic     |
| 17 | 15959537  | G | A | rs11657857              | 9.74E-02 | 0.038 | 0.025 | 1.52 | 1.07 | -2.16 | 3.08E-05 | 0.049 | 0.042 | 1.19 | 0.91 | -1.57 | 1.52   | 9.90E-02 | NCOR1                                           | intronic       |
| 5  | 145787259 | T | C | rs12517249              | 9.70E-02 | 0.032 | 0.021 | 1.54 | 1.05 | -2.26 | 2.96E-05 | 0.046 | 0.042 | 1.10 | 0.83 | -1.46 | 1.48   | 9.94E-02 | POU4F3(dist=67176), TCERG1(dist=39614)          | intergenic     |
| 10 | 32090893  | T | C | rs7100310               | 5.28E-05 | 0.138 | 0.194 | 0.66 | 0.56 | -0.79 | 2.70E-01 | 0.199 | 0.183 | 1.11 | 0.96 | -1.29 | 0.90   | 1.00E-01 | ZEB1(dist=272151), ARHGAP12(dist=3433)          | intergenic     |
| 11 | 104454149 | A | G | rs34526738              | 9.26E-02 | 0.299 | 0.276 | 1.12 | 0.97 | -1.28 | 6.20E-05 | 0.221 | 0.268 | 0.78 | 0.67 | -0.89 | 0.92   | 1.00E-01 | LOC102723895                                    | ncRNA_intronic |
| 12 | 44290544  | C | T | rs114079287,rs386762605 | 1.96E-01 | 0.038 | 0.048 | 0.79 | 0.58 | -1.08 | 3.79E-05 | 0.051 | 0.029 | 1.78 | 1.34 | -2.37 | 1.22   | 1.00E-01 | TMEM117                                         | intronic       |
| 19 | 36645683  | G | A | rs148955536             | 5.68E-02 | 0.044 | 0.060 | 0.72 | 0.54 | -0.97 | 3.83E-05 | 0.076 | 0.051 | 1.53 | 1.22 | -1.93 | 1.21   | 1.02E-01 | COX7A1(dist=1912), ZNF565(dist=27279)           | intergenic     |
| 8  | 6014726   | G | C | rs2552265               | 8.82E-02 | 0.268 | 0.297 | 0.87 | 0.75 | -1    | 3.15E-05 | 0.305 | 0.248 | 1.33 | 1.17 | -1.51 | 1.09   | 1.02E-01 | CSMD1(dist=1162398), LOC100287015(dist=246351)  | intergenic     |
| 10 | 68034367  | A | T | rs10997030              | 5.24E-05 | 0.109 | 0.073 | 1.56 | 1.26 | -1.93 | 2.84E-01 | 0.095 | 0.105 | 0.89 | 0.73 | -1.09 | 1.15   | 1.03E-01 | CTNNA3                                          | intronic       |
| 10 | 31704572  | C | T | rs161254                | 5.59E-05 | 0.273 | 0.190 | 0.63 | 0.54 | -0.72 | 2.57E-01 | 0.239 | 0.270 | 1.18 | 1.03 | -1.35 | 0.90   | 1.05E-01 | ZEB1                                            | intronic       |
| 10 | 50379773  | A | G | rs2002435               | 6.00E-05 | 0.342 | 0.266 | 0.69 | 0.61 | -0.79 | 2.77E-01 | 0.299 | 0.324 | 1.13 | 0.99 | -1.28 | 0.92   | 1.05E-01 | C10orf128                                       | intronic       |
| 4  | 79982983  | C | A | rs114997541             | 2.02E-01 | 0.026 | 0.034 | 0.76 | 0.52 | -1.11 | 3.88E-05 | 0.039 | 0.023 | 1.70 | 1.23 | -2.34 | 1.30   | 1.08E-01 | LINC01088                                       | ncRNA_intronic |
| 8  | 633770    | C | A | rs336443                | 6.25E-05 | 0.027 | 0.053 | 0.49 | 0.34 | -0.69 | 1.49E-01 | 0.053 | 0.041 | 1.29 | 0.98 | -1.68 | 0.83   | 1.08E-01 | ERICH1                                          | intronic       |
| 10 | 32091654  | T | C | rs73251478              | 5.31E-05 | 0.140 | 0.195 | 0.67 | 0.56 | -0.79 | 2.56E-01 | 0.201 | 0.184 | 1.11 | 0.96 | -1.29 | 0.90   | 1.08E-01 | ZEB1(dist=272912), ARHGAP12(dist=2672)          | intergenic     |
| 8  | 106598218 | G | A | rs72673755              | 6.33E-06 | 0.059 | 0.092 | 0.62 | 0.48 | -0.79 | 5.47E-02 | 0.101 | 0.090 | 1.12 | 0.92 | -1.37 | 0.87   | 1.09E-01 | ZFPM2                                           | intronic       |
| 2  | 208158100 | C | T | rs16839577              | 8.11E-02 | 0.163 | 0.138 | 1.22 | 1.03 | -1.45 | 3.84E-05 | 0.103 | 0.147 | 0.67 | 0.55 | -0.81 | 0.90   | 1.11E-01 | MIR1302-4(dist=23952), CREB1(dist=236516)       | intergenic     |
| 4  | 35982123  | C | G | rs4832919               | 5.80E-05 | 0.276 | 0.219 | 1.36 | 1.18 | -1.56 | 1.28E-01 | 0.236 | 0.263 | 0.86 | 0.75 | -0.99 | 1.09   | 1.13E-01 | LOC101928622(dist=1940608), ARAP2(dist=85497)   | intergenic     |
| 4  | 35986025  | A | G | rs6831355               | 6.25E-05 | 0.276 | 0.219 | 1.36 | 1.18 | -1.56 | 1.29E-01 | 0.236 | 0.264 | 0.86 | 0.75 | -0.99 | 1.09   | 1.15E-01 | LOC101928622(dist=1944510), ARAP2(dist=81595)   | intergenic     |
| 4  | 139631944 | C | A | rs72937607              | 3.53E-05 | 0.150 | 0.114 | 1.37 | 1.15 | -1.64 | 1.04E-01 | 0.118 | 0.126 | 0.92 | 0.77 | -1.11 | 1.12   | 1.15E-01 | LINC00499(dist=286446), CCRN4L(dist=304969)     | intergenic     |
| 19 | 36995235  | C | T | rs184387894             | 9.14E-03 | 0.012 | 0.023 | 0.52 | 0.31 | -0.87 | 9.68E-06 | 0.041 | 0.023 | 1.80 | 1.32 | -2.47 | 1.32   | 1.17E-01 | LOC728752(dist=13293), ZNF260(dist=6354)        | intergenic     |
| 8  | 106599430 | G | A | rs112451216             | 2.45E-05 | 0.068 | 0.103 | 0.65 | 0.51 | -0.82 | 8.53E-02 | 0.109 | 0.099 | 1.11 | 0.92 | -1.34 | 0.88   | 1.22E-01 | ZFPM2                                           | intronic       |
| 10 | 24665624  | G | T | rs112253843             | 6.63E-06 | 0.074 | 0.037 | 2.12 | 1.62 | -2.77 | 2.00E-01 | 0.091 | 0.108 | 0.83 | 0.68 | -1.01 | 1.17   | 1.23E-01 | KIAA1217                                        | intronic       |
| 10 | 130291391 | G | A | rs74159401              | 3.23E-05 | 0.043 | 0.027 | 1.62 | 1.16 | -2.25 | 7.19E-02 | 0.019 | 0.024 | 0.79 | 0.52 | -1.2  | 1.33   | 1.26E-01 | LINC01163(dist=175401), MGMT(dist=974063)       | intergenic     |
| 10 | 24691875  | G | C | rs72776750              | 7.86E-06 | 0.074 | 0.041 | 1.89 | 1.45 | -2.46 | 2.46E-01 | 0.075 | 0.089 | 0.83 | 0.67 | -1.03 | 1.19   | 1.27E-01 | KIAA1217                                        | intronic       |
| 12 | 110283382 | A | G | rs12316750              | 1.58E-02 | 0.108 | 0.137 | 0.77 | 0.63 | -0.93 | 2.28E-05 | 0.159 | 0.118 | 1.42 | 1.21 | -1.67 | 1.11   | 1.27E-01 | MIR4497(dist=12141), GLTP(dist=5366)            | intergenic     |
| 10 | 31577713  | A | T | rs7911781               | 6.13E-05 | 0.257 | 0.176 | 0.62 | 0.53 | -0.71 | 2.03E-01 | 0.230 | 0.263 | 1.19 | 1.04 | -1.37 | 0.91   | 1.29E-01 | ZNF438(dist=256847), ZEB1-AS1(dist=27744)       | intergenic     |
| 8  | 5996200   | C | G | rs2700712               | 1.21E-01 | 0.097 | 0.114 | 0.83 | 0.68 | -1.02 | 3.03E-05 | 0.118 | 0.083 | 1.48 | 1.23 | -1.78 | 1.13   | 1.31E-01 | CSMD1(dist=1143872), LOC100287015(dist=264877)  | intergenic     |
| 10 | 12386404  | C | A | rs111952600             | 5.17E-05 | 0.074 | 0.050 | 1.54 | 1.2  | -1.99 | 1.62E-01 | 0.046 | 0.053 | 0.87 | 0.66 | -1.14 | 1.17   | 1.32E-01 | TACC2                                           | intronic       |
| 2  | 208155956 | A | G | rs12052532              | 4.58E-02 | 0.172 | 0.144 | 1.24 | 1.05 | -1.47 | 2.36E-05 | 0.111 | 0.157 | 0.67 | 0.56 | -0.8  | 0.91   | 1.35E-01 | MIR1302-4(dist=21808), CREB1(dist=238660)       | intergenic     |
| 17 | 76805287  | A | G | rs11870759              | 1.89E-01 | 0.031 | 0.039 | 0.79 | 0.56 | -1.11 | 3.09E-05 | 0.040 | 0.023 | 1.73 | 1.26 | -2.37 | 1.28   | 1.41E-01 | USP36                                           | intronic       |
| 8  | 5996685   | A | G | rs2570702               | 1.05E-01 | 0.093 | 0.111 | 0.82 | 0.67 | -1.01 | 3.27E-05 | 0.117 | 0.083 | 1.48 | 1.22 | -1.78 | 1.13   | 1.44E-01 | CSMD1(dist=1144357), LOC100287015(dist=264392)  | intergenic     |
| 4  | 25581351  | A | G | rs7681794               | 1.47E-01 | 0.039 | 0.047 | 0.82 | 0.6  | -1.12 | 3.97E-05 | 0.055 | 0.039 | 1.42 | 1.09 | -1.86 | 0.73   | 1.48E-01 | ANAPC4(dist=161231), SLC34A2(dist=76084)        | intergenic     |
| 1  | 61782949  | T | C | rs11207722              | 7.27E-02 | 0.056 | 0.072 | 0.76 | 0.59 | -0.99 | 4.25E-05 | 0.105 | 0.077 | 1.40 | 1.15 | -1.71 | 1.15   | 1.50E-01 | NFIA                                            | intronic       |
| 1  | 61794156  | C | T | rs71641728              | 6.99E-02 | 0.065 | 0.082 | 0.78 | 0.61 | -1    | 5.69E-05 | 0.108 | 0.079 | 1.40 | 1.16 | -1.7  | 1.14   | 1.51E-01 | NFIA                                            | intronic       |
| 4  | 2061334   | C | T | rs183901937             | 4.44E-05 | 0.131 | 0.104 | 1.30 | 1.08 | -1.58 | 4.93E-02 | 0.091 | 0.102 | 0.88 | 0.72 | -1.08 | 1.15   | 1.51E-01 | NAT8L                                           | exonic         |
| 8  | 11524768  | C | T | rs56191770,rs386722291  | 5.82E-05 | 0.151 | 0.108 | 1.46 | 1.22 | -1.75 | 8.63E-02 | 0.102 | 0.123 | 0.81 | 0.67 | -0.98 | 1.12   | 1.53E-01 | LINC00208(dist=85918), GATA4(dist=36949)        | intergenic     |
| 1  | 69154409  | T | A | rs75143548              | 1.51E-01 | 0.018 | 0.021 | 0.85 | 0.54 | -1.34 | 1.31E-05 | 0.040 | 0.031 | 1.30 | 0.96 | -1.76 | 0.71   | 1.54E-01 | DEPDC1-AS1(dist=150099), LRRC7(dist=1071449)    | intergenic     |
| 10 | 123875928 | C | T | rs73372127              | 3.66E-05 | 0.071 | 0.047 | 1.56 | 1.2  | -2.02 | 8.36E-02 | 0.040 | 0.048 | 0.83 | 0.62 | -1.12 | 1.18   | 1.58E-01 | TACC2                                           | intronic       |
| 13 | 28186925  | C | T | rs116788974             | 1.50E-01 | 0.044 | 0.039 | 1.11 | 0.82 | -1.51 | 1.18E-06 | 0.040 | 0.026 | 1.56 | 1.14 | -2.13 | 1.34   | 1.59E-01 | LNX2                                            | intronic       |
| 1  | 61791554  | G | A | rs12742828              | 5.44E-02 | 0.064 | 0.082 | 0.76 | 0.6  | -0.98 | 3.70E-05 | 0.112 | 0.083 | 1.40 | 1.16 | -1.69 | 1.14   | 1.60E-01 | NFIA                                            | intronic       |
| 10 | 7198134   | T | C | rs17142539              | 1.27E-01 | 0.077 | 0.095 | 0.79 | 0.63 | -1    | 4.80E-05 | 0.086 | 0.061 | 1.44 | 1.16 | -1.78 | 1.15   | 1.62E-01 | LINC00707(dist=313266), SFMBT2(dist=2452)       | intergenic     |
| 19 | 36608094  | A | G | rs75735458              | 3.79E-02 | 0.043 | 0.060 | 0.71 | 0.53 | -0.95 | 1.82E-05 | 0.066 | 0.042 | 1.61 | 1.26 | -2.06 | 1.18   | 1.62E-01 | TBCB                                            | intronic       |
| 1  | 61781106  | C | T | rs41423747              | 6.04E-02 | 0.057 | 0.073 | 0.76 | 0.59 | -0.99 | 5.16E-05 | 0.104 | 0.077 | 1.40 | 1.15 | -1.7  | 1.14   | 1.67E-01 | NFIA                                            | intronic       |
| 20 | 6962844   | C | T | rs145687738             | 7.98E-02 | 0.070 | 0.087 | 0.79 | 0.62 | -0.99 | 3.18E-05 | 0.099 | 0.071 | 1.45 | 1.18 | -1.77 | 1.15   | 1.67E-01 | BMP2(dist=201934), LINC01428(dist=164270)       | intergenic     |
| 1  | 61777218  | G | A | rs2363874               | 6.41E-02 | 0.056 | 0.072 | 0.76 | 0.59 | -0.99 | 5.02E-05 | 0.103 | 0.076 | 1.40 | 1.14 | -1.7  | 1.14   | 1.71E-01 | NFIA                                            | intronic       |
| 1  | 61776107  | T | C | rs35998452              | 6.57E-02 | 0.056 | 0.072 | 0.76 | 0.59 | -0.99 | 5.60E-05 | 0.103 | 0.076 | 1.39 | 1.14 | -1.7  | 1.14   | 1.72E-01 | NFIA                                            | intronic       |
| 2  | 235885414 | G | A | rs114426876             | 1.67E-01 | 0.026 | 0.032 | 0.79 | 0.54 | -1.16 | 4.09E-06 | 0.030 | 0.021 | 1.43 | 1    | -2.04 | 0.73   | 1.75E-01 | SH3BP4                                          | intronic       |
| 19 | 36583661  | C | T | rs61744321              | 3.25E-02 | 0.038 | 0.056 | 0.67 | 0.49 | -0.91 | 1.01E-05 | 0.067 | 0.042 | 1.63 | 1.27 | -2.08 | 1.17   | 1.79E-01 | WDR62                                           | exonic         |
| 1  | 69136838  | C | T | rs80252869              | 1.77E-01 | 0.020 | 0.022 | 0.91 | 0.59 | -1.4  | 1.45E-05 | 0.039 | 0.030 | 1.29 | 0.95 | -1.76 | 0.71   | 1.81E-01 | DEPDC1-AS1(dist=132528), LRRC7(dist=1089020)    | intergenic     |
| 4  | 3641232   | G | A | rs73196209              | 1.81E-01 | 0.037 | 0.042 | 0.88 | 0.64 | -1.21 | 2.67E-05 | 0.031 | 0.023 | 1.33 | 0.94 | -1.89 | 0.76   | 1.82E-01 | LINC00955(dist=48520), LOC100133461(dist=34088) | intergenic     |
| 1  | 104480469 | G | T | rs12731458              | 2.86E-02 | 0.292 | 0.325 | 0.86 | 0.75 | -0.98 | 3.72E-05 | 0.353 | 0.299 | 1.28 | 1.13 | -1.45 | 1.07   | 1.85E-01 | AMY1A(dist=179158), LOC100129138(dist=135176)   | intergenic     |
| 17 | 16135136  | G | A | rs28622079              | 1.88E-01 | 0.033 | 0.022 | 1.56 | 1.08 | -2.27 | 3.06E-05 | 0.049 | 0.041 | 1.21 | 0.91 | -1.59 | 1.37</ |          |                                                 |                |

|    |           |   |   |                        |          |       |       |      |      |      |          |       |       |      |             |      |          |                                                 |                |
|----|-----------|---|---|------------------------|----------|-------|-------|------|------|------|----------|-------|-------|------|-------------|------|----------|-------------------------------------------------|----------------|
| 3  | 28189688  | T | C | rs12629858             | 6.42E-05 | 0.475 | 0.413 | 0.78 | 0.69 | 0.88 | 1.48E-02 | 0.391 | 0.421 | 1.13 | 1 - 1.28    | 0.94 | 2.11E-01 | EOMES(dist=425482), CMC1(dist=93436)            | intergenic     |
| 10 | 49458749  | G | A | rs1652244              | 1.87E-05 | 0.130 | 0.078 | 0.57 | 0.46 | 0.69 | 4.57E-02 | 0.099 | 0.122 | 1.26 | 1.04 - 1.53 | 0.89 | 2.14E-01 | FRMPD2                                          | intronic       |
| 1  | 61785546  | G | A | rs17121952             | 3.61E-02 | 0.058 | 0.076 | 0.75 | 0.58 | 0.97 | 4.93E-05 | 0.104 | 0.077 | 1.40 | 1.15 - 1.71 | 1.12 | 2.16E-01 | NFIA                                            | intronic       |
| 19 | 36609067  | G | C | rs60393405             | 3.10E-02 | 0.037 | 0.055 | 0.66 | 0.49 | 0.9  | 1.81E-05 | 0.066 | 0.042 | 1.61 | 1.26 - 2.06 | 1.15 | 2.19E-01 | TBCB                                            | intronic       |
| 20 | 61698888  | C | T | rs139907250            | 2.16E-01 | 0.037 | 0.033 | 1.15 | 0.82 | 1.6  | 2.09E-05 | 0.035 | 0.023 | 1.55 | 1.11 - 2.16 | 1.36 | 2.22E-01 | LOC63930                                        | ncRNA_intronic |
| 19 | 9286903   | G | A | rs145271949            | 6.41E-05 | 0.040 | 0.022 | 1.86 | 1.31 | 2.66 | 4.54E-02 | 0.024 | 0.030 | 0.81 | 0.56 - 1.17 | 1.20 | 2.22E-01 | ZNF317(dist=12812), OR7D2(dist=9367)            | intergenic     |
| 4  | 80005399  | C | T | rs115769267            | 8.88E-02 | 0.023 | 0.034 | 0.68 | 0.46 | 1    | 1.88E-05 | 0.039 | 0.023 | 1.72 | 1.25 - 2.37 | 1.21 | 2.23E-01 | LINC01088                                       | ncRNA_intronic |
| 4  | 139642078 | G | A | rs72937626             | 5.69E-05 | 0.118 | 0.084 | 1.45 | 1.19 | 1.78 | 2.24E-02 | 0.071 | 0.085 | 0.81 | 0.65 - 1.02 | 1.10 | 2.26E-01 | LINC00499(dist=296580), CCRN4L(dist=294835)     | intergenic     |
| 19 | 9285869   | G | A | rs114607797            | 6.40E-05 | 0.039 | 0.022 | 1.86 | 1.3  | 2.65 | 4.81E-02 | 0.025 | 0.030 | 0.81 | 0.56 - 1.18 | 1.20 | 2.28E-01 | ZNF317(dist=11778), OR7D2(dist=10401)           | intergenic     |
| 4  | 79989657  | T | C | rs115386999            | 8.75E-02 | 0.023 | 0.034 | 0.68 | 0.46 | 1    | 1.97E-05 | 0.039 | 0.023 | 1.72 | 1.25 - 2.37 | 1.21 | 2.29E-01 | LINC01088                                       | ncRNA_intronic |
| 19 | 36557609  | G | C | rs58955389             | 1.28E-02 | 0.035 | 0.053 | 0.65 | 0.47 | 0.89 | 1.10E-05 | 0.065 | 0.042 | 1.60 | 1.25 - 2.05 | 1.17 | 2.29E-01 | WDR62                                           | intronic       |
| 19 | 9285535   | C | T | rs115681160            | 6.45E-05 | 0.039 | 0.021 | 1.85 | 1.3  | 2.65 | 4.92E-02 | 0.025 | 0.030 | 0.82 | 0.56 - 1.18 | 1.20 | 2.30E-01 | ZNF317(dist=11444), OR7D2(dist=10735)           | intergenic     |
| 8  | 106605870 | T | C | rs62527241             | 7.04E-06 | 0.058 | 0.091 | 0.62 | 0.48 | 0.8  | 2.18E-02 | 0.106 | 0.092 | 1.17 | 0.96 - 1.42 | 0.91 | 2.32E-01 | ZFPM2                                           | intronic       |
| 8  | 5990511   | C | T | rs2570654              | 1.01E-02 | 0.188 | 0.233 | 0.76 | 0.65 | 0.89 | 1.55E-05 | 0.244 | 0.187 | 1.41 | 1.23 - 1.62 | 1.07 | 2.34E-01 | CSMD1(dist=1138183), LOC100287015(dist=270566)  | intergenic     |
| 19 | 36485438  | C | A | rs77694703             | 2.97E-02 | 0.037 | 0.054 | 0.69 | 0.5  | 0.94 | 2.49E-05 | 0.059 | 0.037 | 1.61 | 1.24 - 2.1  | 1.16 | 2.36E-01 | SDHAF1                                          | upstream       |
| 17 | 1410882   | T | G | rs112877133            | 1.49E-05 | 0.042 | 0.021 | 2.00 | 1.41 | 2.84 | 3.27E-02 | 0.030 | 0.042 | 0.69 | 0.49 - 0.97 | 1.19 | 2.41E-01 | INPP5K                                          | intronic       |
| 8  | 5990440   | G | T | rs2552209              | 1.05E-02 | 0.188 | 0.232 | 0.76 | 0.65 | 0.89 | 3.65E-05 | 0.245 | 0.188 | 1.40 | 1.22 - 1.61 | 1.07 | 2.47E-01 | CSMD1(dist=1138112), LOC100287015(dist=270637)  | intergenic     |
| 4  | 3644747   | G | A | rs73196213             | 3.66E-01 | 0.038 | 0.043 | 0.88 | 0.64 | 1.21 | 4.31E-05 | 0.032 | 0.024 | 1.34 | 0.95 - 1.89 | 0.83 | 2.67E-01 | LINC00955(dist=52035), LOC100133461(dist=30573) | intergenic     |
| 16 | 81798874  | G | C | rs116322606            | 2.66E-01 | 0.024 | 0.021 | 1.15 | 0.76 | 1.74 | 7.47E-06 | 0.035 | 0.025 | 1.44 | 1.04 - 2    | 1.31 | 2.81E-01 | CMIP(dist=53507), PLCG2(dist=13989)             | intergenic     |
| 16 | 81799707  | C | T | rs77678007             | 2.69E-01 | 0.024 | 0.021 | 1.15 | 0.76 | 1.73 | 7.92E-06 | 0.035 | 0.025 | 1.44 | 1.04 - 2    | 1.31 | 2.84E-01 | CMIP(dist=54340), PLCG2(dist=13156)             | intergenic     |
| 16 | 81799490  | A | G | rs138625434            | 2.69E-01 | 0.024 | 0.021 | 1.15 | 0.76 | 1.73 | 7.68E-06 | 0.035 | 0.025 | 1.44 | 1.04 - 2    | 1.31 | 2.84E-01 | CMIP(dist=54123), PLCG2(dist=13373)             | intergenic     |
| 8  | 127592616 | G | A | rs7812696              | 2.74E-01 | 0.085 | 0.080 | 1.07 | 0.86 | 1.34 | 2.30E-05 | 0.155 | 0.137 | 1.16 | 0.98 - 1.36 | 0.87 | 2.88E-01 | FAM84B(dist=21905), PCAT1(dist=432783)          | intergenic     |
| 8  | 18292986  | C | G | rs78290443             | 2.75E-01 | 0.054 | 0.051 | 1.07 | 0.81 | 1.41 | 3.76E-07 | 0.054 | 0.034 | 1.61 | 1.23 - 2.12 | 1.22 | 2.90E-01 | NAT2(dist=34263), PSD3(dist=91827)              | intergenic     |
| 16 | 81804459  | C | T | rs142105916            | 2.77E-01 | 0.027 | 0.025 | 1.10 | 0.75 | 1.62 | 2.67E-05 | 0.034 | 0.024 | 1.43 | 1.02 - 1.99 | 1.33 | 2.93E-01 | CMIP(dist=59092), PLCG2(dist=8404)              | intergenic     |
| 19 | 36491745  | G | A | rs116703004            | 2.97E-02 | 0.038 | 0.054 | 0.69 | 0.5  | 0.94 | 5.06E-05 | 0.056 | 0.036 | 1.60 | 1.23 - 2.09 | 1.14 | 2.97E-01 | SDHAF1(dist=4525), SYNE4(dist=2257)             | intergenic     |
| 20 | 61692474  | A | G | rs151267029            | 2.95E-01 | 0.037 | 0.034 | 1.12 | 0.8  | 1.56 | 2.10E-06 | 0.042 | 0.027 | 1.57 | 1.16 - 2.14 | 1.29 | 3.02E-01 | LOC63930                                        | ncRNA_intronic |
| 8  | 141522710 | C | G | rs74333573             | 2.91E-01 | 0.037 | 0.045 | 0.83 | 0.6  | 1.14 | 1.99E-05 | 0.046 | 0.032 | 1.47 | 1.1 - 1.97  | 0.82 | 3.05E-01 | CHRAC1                                          | intronic       |
| 19 | 7270149   | C | T | rs34380919             | 2.91E-01 | 0.072 | 0.064 | 1.13 | 0.88 | 1.44 | 8.03E-06 | 0.072 | 0.059 | 1.23 | 0.98 - 1.55 | 1.16 | 3.06E-01 | INSR                                            | intronic       |
| 16 | 81803866  | C | A | rs115241505            | 2.91E-01 | 0.026 | 0.024 | 1.10 | 0.74 | 1.63 | 2.32E-05 | 0.034 | 0.024 | 1.43 | 1.02 - 2    | 1.32 | 3.07E-01 | CMIP(dist=58499), PLCG2(dist=8997)              | intergenic     |
| 1  | 242330417 | T | A | rs199764889;rs12564355 | 2.36E-05 | 0.212 | 0.172 | 1.30 | 1.11 | 1.51 | 4.66E-03 | 0.150 | 0.173 | 0.84 | 0.72 - 0.99 | 1.07 | 3.11E-01 | PLD5                                            | intronic       |
| 4  | 3638684   | C | T | rs73196205             | 3.20E-01 | 0.035 | 0.039 | 0.89 | 0.64 | 1.24 | 1.91E-05 | 0.030 | 0.023 | 1.34 | 0.95 - 1.91 | 0.84 | 3.22E-01 | LINC00955(dist=45972), LOC100133461(dist=36636) | intergenic     |
| 4  | 3638838   | G | A | rs73196207             | 3.23E-01 | 0.031 | 0.034 | 0.90 | 0.64 | 1.29 | 9.94E-07 | 0.029 | 0.021 | 1.37 | 0.96 - 1.97 | 0.82 | 3.25E-01 | LINC00955(dist=46126), LOC100133461(dist=36482) | intergenic     |
| 4  | 139639680 | A | G | rs113945828            | 5.80E-05 | 0.123 | 0.089 | 1.44 | 1.18 | 1.75 | 1.21E-02 | 0.076 | 0.093 | 0.80 | 0.64 - 1    | 1.08 | 3.25E-01 | LINC00499(dist=294182), CCRN4L(dist=297233)     | intergenic     |
| 19 | 36507767  | C | G | rs114026056            | 1.10E-02 | 0.030 | 0.047 | 0.62 | 0.44 | 0.87 | 2.72E-05 | 0.053 | 0.032 | 1.69 | 1.28 - 2.22 | 1.14 | 3.34E-01 | LOC101927572(NM_001290056:c.-48C>G)             | UTR5           |
| 8  | 2024403   | A | G | rs116613141            | 9.47E-03 | 0.046 | 0.066 | 0.69 | 0.52 | 0.91 | 4.33E-05 | 0.070 | 0.044 | 1.62 | 1.28 - 2.07 | 1.11 | 3.42E-01 | MYOM2                                           | intronic       |
| 10 | 101682300 | A | G | rs7077577              | 2.52E-05 | 0.341 | 0.397 | 0.79 | 0.69 | 0.9  | 3.20E-02 | 0.419 | 0.391 | 1.12 | 1 - 1.26    | 0.95 | 3.43E-01 | DNMBP                                           | intronic       |
| 9  | 117585897 | G | C | rs56211063             | 3.36E-01 | 0.052 | 0.048 | 1.08 | 0.81 | 1.43 | 4.45E-05 | 0.059 | 0.041 | 1.45 | 1.12 - 1.88 | 1.16 | 3.46E-01 | TNFSF15(dist=17489), TNFSF8(dist=69726)         | intergenic     |
| 1  | 99728334  | G | A | rs79754822             | 3.46E-01 | 0.029 | 0.029 | 1.00 | 0.69 | 1.44 | 3.18E-08 | 0.070 | 0.056 | 1.28 | 1.01 - 1.61 | 0.79 | 3.50E-01 | LOC100129620(dist=113926), LPPR4(dist=1514)     | intergenic     |
| 10 | 61993554  | T | A | rs7903787              | 4.66E-05 | 0.367 | 0.437 | 0.75 | 0.66 | 0.85 | 3.42E-02 | 0.433 | 0.400 | 1.15 | 1.02 - 1.29 | 0.96 | 3.59E-01 | ANK3                                            | intronic       |
| 16 | 81796597  | G | C | rs148784601            | 3.47E-01 | 0.026 | 0.023 | 1.10 | 0.74 | 1.64 | 5.18E-06 | 0.037 | 0.026 | 1.43 | 1.04 - 1.97 | 1.25 | 3.62E-01 | CMIP(dist=51230), PLCG2(dist=16266)             | intergenic     |
| 17 | 6320905   | G | A | rs77391179             | 3.64E-01 | 0.036 | 0.034 | 1.06 | 0.76 | 1.48 | 6.29E-05 | 0.038 | 0.024 | 1.60 | 1.16 - 2.2  | 1.24 | 3.66E-01 | WSCD1(dist=293158), AIPL1(dist=6152)            | intergenic     |
| 10 | 101675129 | A | G | rs10883422;rs35813317  | 4.95E-05 | 0.390 | 0.447 | 0.79 | 0.7  | 0.9  | 3.75E-02 | 0.459 | 0.430 | 1.12 | 1 - 1.26    | 0.96 | 3.67E-01 | DNMBP                                           | intronic       |
| 16 | 81798597  | G | T | rs149847160            | 3.54E-01 | 0.026 | 0.023 | 1.10 | 0.74 | 1.63 | 5.07E-06 | 0.037 | 0.026 | 1.43 | 1.04 - 1.97 | 1.25 | 3.69E-01 | CMIP(dist=53230), PLCG2(dist=14266)             | intergenic     |
| 8  | 127597970 | C | T | rs1009784              | 3.59E-01 | 0.076 | 0.070 | 1.08 | 0.86 | 1.37 | 3.02E-05 | 0.150 | 0.133 | 1.16 | 0.98 - 1.37 | 0.89 | 3.73E-01 | FAM84B(dist=27259), PCAT1(dist=427429)          | intergenic     |
| 4  | 139636996 | G | A | rs7687772              | 5.26E-05 | 0.114 | 0.084 | 1.39 | 1.13 | 1.71 | 2.04E-02 | 0.083 | 0.098 | 0.83 | 0.68 - 1.03 | 1.07 | 3.74E-01 | LINC00499(dist=291498), CCRN4L(dist=299917)     | intergenic     |
| 8  | 127600571 | G | A | rs1010086              | 3.65E-01 | 0.076 | 0.071 | 1.08 | 0.85 | 1.37 | 2.76E-05 | 0.152 | 0.134 | 1.16 | 0.98 - 1.37 | 0.89 | 3.80E-01 | FAM84B(dist=29860), PCAT1(dist=424828)          | intergenic     |
| 13 | 24750520  | G | T | rs74041909             | 3.71E-01 | 0.022 | 0.027 | 0.83 | 0.55 | 1.24 | 1.59E-05 | 0.037 | 0.024 | 1.60 | 1.15 - 2.21 | 0.78 | 3.82E-01 | SPATA13                                         | intronic       |
| 6  | 166915041 | C | T | rs16899021             | 3.74E-01 | 0.043 | 0.050 | 0.84 | 0.62 | 1.14 | 2.74E-05 | 0.059 | 0.040 | 1.50 | 1.16 - 1.94 | 0.87 | 3.82E-01 | RPS6KA2                                         | intronic       |
| 6  | 166915505 | G | A | rs115816393            | 3.79E-01 | 0.043 | 0.050 | 0.84 | 0.63 | 1.14 | 2.78E-05 | 0.059 | 0.040 | 1.50 | 1.16 - 1.94 | 0.87 | 3.87E-01 | RPS6KA2                                         | intronic       |
| 4  | 139634263 | T | C | rs59460371             | 5.72E-05 | 0.133 | 0.099 | 1.39 | 1.15 | 1.69 | 8.80E-03 | 0.085 | 0.103 | 0.81 | 0.66 - 1    | 1.07 | 3.88E-01 | LINC00499(dist=288765), CCRN4L(dist=302650)     | intergenic     |
| 7  | 120481    | G | A | rs114059049            | 3.96E-01 | 0.024 | 0.022 | 1.08 | 0.72 | 1.63 | 1.25E-07 | 0.034 | 0.020 | 1.69 | 1.2 - 2.39  | 1.28 | 4.01E-01 | NONE(dist=NONE), LOC100507642(dist=29237)       | intergenic     |
| 8  | 127594578 | A | G | rs10956311             | 3.90E-01 | 0.076 | 0.070 | 1.09 | 0.86 | 1.38 | 1.56E-05 | 0.153 | 0.134 | 1.16 | 0.99 - 1.37 | 0.90 | 4.05E-01 | FAM84B(dist=23867), PCAT1(dist=430821)          | intergenic     |
| 8  | 127594509 | T | A | rs11775423             | 3.91E-01 | 0.076 | 0.070 | 1.09 | 0.86 | 1.38 | 1.57E-05 | 0.153 | 0.134 | 1.16 | 0.99 - 1.37 | 0.90 | 4.06E-01 | FAM84B(dist=23798), PCAT1(dist=430890)          | intergenic     |
| 6  | 162296229 | G | A | rs189195102            | 4.02E-01 | 0.121 | 0.135 | 0.88 | 0.73 | 1.06 | 1.97E-05 | 0.124 | 0.096 | 1.32 | 1.1 - 1.59  | 0.92 | 4.10E-01 | PARK2                                           | intronic       |
| 7  | 129546400 | A | T | rs13242512             | 4.25E-01 | 0.024 | 0.020 | 1.20 | 0.79 | 1.83 | 6.23E-05 | 0.038 | 0.028 | 1.35 | 0.99 - 1.86 | 1.26 | 4.30E-01 | UBE2H                                           | intronic       |
| 7  | 8788531   | T | C | rs7806959              | 4.31E-01 | 0.283 | 0.279 | 0.98 | 0.85 | 1.12 | 4.68E-05 | 0.269 | 0.320 | 1.28 | 1.12 - 1.46 | 1.08 | 4.37E-01 | INXPH1                                          | intronic       |
| 11 | 8446529   | C | T | rs144068980            | 4.35E-01 | 0.039 | 0.041 | 0.95 | 0.69 | 1.31 | 2.15E-05 | 0.034 | 0.026 | 1.33 | 0.95 - 1.85 | 0.84 | 4.40E-01 | STK33                                           | intronic       |
| 7  | 120808    | C | T | rs138892364            | 4.37E-01 |       |       |      |      |      |          |       |       |      |             |      |          |                                                 |                |



|    |           |   |                       |                         |          |       |       |      |       |          |          |       |       |      |       |       |          |          |                                                     |                |
|----|-----------|---|-----------------------|-------------------------|----------|-------|-------|------|-------|----------|----------|-------|-------|------|-------|-------|----------|----------|-----------------------------------------------------|----------------|
| 8  | 28310250  | G | A                     | rs137863210             | 4.56E-01 | 0.048 | 0.054 | 0.89 | 0.67  | -1.18    | 1.42E-05 | 0.052 | 0.036 | 1.45 | 1.1   | -1.9  | 0.88     | 4.70E-01 | FBXO16                                              | intronic       |
| 13 | 112873766 | G | T                     | rs34062441              | 4.73E-01 | 0.025 | 0.026 | 0.97 | 0.66  | -1.44    | 2.77E-06 | 0.057 | 0.046 | 1.24 | 0.96  | -1.6  | 0.85     | 4.82E-01 | LINC01070(dist=18450), LOC101928730(dist=37274)     | intergenic     |
| 17 | 19619053  | C | G                     | rs12450979              | 4.91E-01 | 0.031 | 0.024 | 1.29 | 0.89  | -1.87    | 9.50E-06 | 0.044 | 0.034 | 1.34 | 1     | -1.79 | 1.19     | 4.93E-01 | SLC47A2                                             | intronic       |
| 4  | 80065213  | G | A                     | rs115571695             | 1.65E-02 | 0.033 | 0.049 | 0.67 | 0.48  | -0.93    | 1.82E-05 | 0.052 | 0.033 | 1.59 | 1.21  | -2.1  | 1.10     | 4.97E-01 | LINC01088                                           | ncRNA_intronic |
| 7  | 5411296   | C | A                     | rs6974647               | 4.98E-01 | 0.434 | 0.423 | 1.04 | 0.92  | -1.18    | 4.01E-05 | 0.391 | 0.425 | 0.87 | 0.77  | -0.98 | 1.06     | 5.03E-01 | TNRC18                                              | intronic       |
| 19 | 27747790  | G | A                     | rs148468683             | 4.97E-01 | 0.019 | 0.022 | 0.88 | 0.56  | -1.37    | 4.33E-05 | 0.033 | 0.022 | 1.52 | 1.08  | -2.14 | 0.82     | 5.10E-01 | NONE(dist=NONE), LINC00662(dist=533611)             | intergenic     |
| 13 | 105478259 | T | C                     | rs1855661               | 5.05E-01 | 0.068 | 0.054 | 1.29 | 1     | -1.67    | 6.06E-05 | 0.094 | 0.083 | 1.14 | 0.93  | -1.4  | 1.11     | 5.14E-01 | LINC01309(dist=1398224), DAOA-AS1(dist=633147)      | intergenic     |
| 4  | 80053527  | G | A                     | rs2903618               | 1.48E-02 | 0.034 | 0.050 | 0.67 | 0.48  | -0.92    | 1.78E-05 | 0.052 | 0.033 | 1.59 | 1.21  | -2.1  | 1.09     | 5.19E-01 | LINC01088                                           | ncRNA_intronic |
| 13 | 105481300 | G | A                     | rs4772641               | 5.11E-01 | 0.071 | 0.055 | 1.31 | 1.02  | -1.68    | 3.75E-05 | 0.092 | 0.080 | 1.17 | 0.96  | -1.44 | 1.10     | 5.20E-01 | LINC01309(dist=1401265), DAOA-AS1(dist=630106)      | intergenic     |
| 11 | 120653095 | C | T                     | rs4936550               | 5.18E-01 | 0.102 | 0.098 | 1.04 | 0.85  | -1.28    | 5.39E-05 | 0.154 | 0.139 | 1.13 | 0.96  | -1.33 | 0.93     | 5.22E-01 | GRIK4                                               | intronic       |
| 4  | 146837176 | C | T                     | rs10027696              | 5.21E-01 | 0.103 | 0.097 | 1.06 | 0.86  | -1.3     | 6.14E-05 | 0.131 | 0.112 | 1.20 | 1     | -1.43 | 1.08     | 5.22E-01 | ZNF827                                              | intronic       |
| 20 | 60151886  | A | G                     | rs2253331               | 5.23E-01 | 0.094 | 0.097 | 0.96 | 0.78  | -1.19    | 5.53E-05 | 0.109 | 0.086 | 1.31 | 1.08  | -1.59 | 0.92     | 5.28E-01 | CDH4                                                | intronic       |
| 15 | 70358260  | C | T                     | rs117133850             | 5.54E-01 | 0.025 | 0.020 | 1.25 | 0.83  | -1.88    | 7.82E-06 | 0.040 | 0.029 | 1.36 | 1     | -1.85 | 1.21     | 5.48E-01 | TLE3                                                | intronic       |
| 10 | 68648096  | C | T                     | rs12762007              | 4.01E-05 | 0.044 | 0.023 | 1.98 | 1.41  | -2.79    | 2.75E-02 | 0.032 | 0.045 | 0.71 | 0.51  | -0.98 | 1.10     | 5.51E-01 | CTNNA3                                              | intronic       |
| 9  | 25027765  | T | G                     | rs77050583              | 5.50E-01 | 0.046 | 0.046 | 0.99 | 0.73  | -1.33    | 7.38E-06 | 0.050 | 0.033 | 1.56 | 1.18  | -2.06 | 1.11     | 5.59E-01 | IZUMO3(dist=482091), TUSC1(dist=648622)             | intergenic     |
| 6  | 258786    | C | A                     | rs12208661              | 5.58E-01 | 0.126 | 0.134 | 0.93 | 0.78  | -1.12    | 5.36E-05 | 0.097 | 0.122 | 0.77 | 0.64  | -0.94 | 0.93     | 5.65E-01 | LOC285766(dist=53302), DUSP22(dist=33271)           | intergenic     |
| 9  | 25033271  | C | A                     | rs116463325             | 5.71E-01 | 0.041 | 0.041 | 0.98 | 0.72  | -1.34    | 6.72E-07 | 0.046 | 0.028 | 1.64 | 1.22  | -2.2  | 1.11     | 5.79E-01 | IZUMO3(dist=487597), TUSC1(dist=643116)             | intergenic     |
| 21 | 17735505  | C | A                     | rs9980224;rs386816572   | 5.84E-01 | 0.474 | 0.491 | 0.93 | 0.82  | -1.06    | 4.95E-05 | 0.427 | 0.456 | 0.89 | 0.79  | -1    | 0.96     | 5.96E-01 | MIR99AHG                                            | ncRNA_intronic |
| 17 | 13335071  | A | G                     | rs62056972              | 5.95E-01 | 0.048 | 0.047 | 1.03 | 0.77  | -1.38    | 5.53E-05 | 0.072 | 0.059 | 1.25 | 0.99  | -1.57 | 0.92     | 5.97E-01 | ELAC2(dist=413690), HS3ST3A1(dist=62278)            | intergenic     |
| 7  | 1286192   | G | C                     | rs13230509              | 5.96E-01 | 0.264 | 0.244 | 1.12 | 0.97  | -1.28    | 6.16E-05 | 0.264 | 0.317 | 0.77 | 0.68  | -0.88 | 1.05     | 6.00E-01 | UNCX(dist=9579), MICALL2(dist=187803)               | intergenic     |
| 2  | 132501699 | T | C                     | rs111410685             | 6.02E-01 | 0.067 | 0.058 | 1.17 | 0.91  | -1.5     | 3.03E-05 | 0.065 | 0.059 | 1.11 | 0.88  | -1.42 | 1.10     | 6.09E-01 | C2orf27A                                            | intronic       |
| 13 | 105478806 | C | G                     | rs7490934               | 6.10E-01 | 0.066 | 0.053 | 1.27 | 0.98  | -1.65    | 5.08E-05 | 0.096 | 0.084 | 1.16 | 0.95  | -1.42 | 1.07     | 6.18E-01 | LINC01309(dist=1398771), DAOA-AS1(dist=632600)      | intergenic     |
| 18 | 5323289   | G | A                     | rs1940954               | 6.24E-01 | 0.222 | 0.199 | 1.15 | 0.99  | -1.34    | 4.48E-05 | 0.210 | 0.264 | 0.74 | 0.64  | -0.85 | 1.04     | 6.25E-01 | ZBTB14(dist=26237), EPB41L3(dist=69091)             | intergenic     |
| 12 | 117558971 | G | C                     | rs2133679               | 6.07E-06 | 0.109 | 0.076 | 1.49 | 1.21  | -1.84    | 6.44E-01 | 0.094 | 0.100 | 0.94 | 0.77  | -1.15 | 1.06     | 6.46E-01 | TESC-AS1                                            | ncRNA_intronic |
| 18 | 6953164   | T | C                     | rs12956512              | 6.73E-01 | 0.156 | 0.167 | 0.92 | 0.78  | -1.09    | 2.24E-05 | 0.154 | 0.123 | 1.29 | 1.1   | -1.52 | 0.95     | 6.73E-01 | LAMA1                                               | intronic       |
| 9  | 25029042  | A | G                     | rs17782547              | 6.72E-01 | 0.063 | 0.061 | 1.04 | 0.8   | -1.34    | 5.21E-05 | 0.096 | 0.076 | 1.28 | 1.05  | -1.57 | 1.07     | 6.78E-01 | IZUMO3(dist=483368), TUSC1(dist=647345)             | intergenic     |
| 9  | 25032235  | A | G                     | rs114168217             | 6.73E-01 | 0.042 | 0.044 | 0.96 | 0.71  | -1.31    | 7.75E-07 | 0.047 | 0.029 | 1.64 | 1.23  | -2.19 | 1.08     | 6.79E-01 | IZUMO3(dist=486561), TUSC1(dist=644152)             | intergenic     |
| 17 | 78256045  | A | rs10871506;rs71354808 | 7.45E-01                | 0.333    | 0.320 | 1.06  | 0.93 | -1.21 | 1.38E-05 | 0.383    | 0.346 | 1.17  | 1.04 | -1.32 | 1.02  | 7.46E-01 | RNF213   | intronic                                            |                |
| 3  | 192654192 | T | C                     | rs113381449             | 7.48E-01 | 0.048 | 0.048 | 0.98 | 0.74  | -1.31    | 2.53E-05 | 0.036 | 0.025 | 1.47 | 1.07  | -2.04 | 1.05     | 7.47E-01 | MB21D2(dist=18242), HRASLS(dist=304725)             | intergenic     |
| 18 | 5321164   | G | T                     | rs74402879              | 7.59E-01 | 0.143 | 0.143 | 1.00 | 0.83  | -1.19    | 1.62E-05 | 0.133 | 0.108 | 1.27 | 1.06  | -1.51 | 1.03     | 7.59E-01 | ZBTB14(dist=24112), EPB41L3(dist=71216)             | intergenic     |
| 9  | 117605524 | G | A                     | rs140546987             | 7.57E-01 | 0.033 | 0.034 | 0.98 | 0.69  | -1.38    | 5.27E-08 | 0.038 | 0.024 | 1.59 | 1.15  | -2.19 | 1.06     | 7.62E-01 | TNFSF15(dist=37116), TNFSF8(dist=50099)             | intergenic     |
| 12 | 6166817   | C | T                     | rs183748305             | 7.60E-01 | 0.043 | 0.043 | 1.00 | 0.74  | -1.36    | 3.23E-05 | 0.045 | 0.029 | 1.56 | 1.16  | -2.1  | 1.05     | 7.65E-01 | VVVF                                                | intronic       |
| 4  | 14686582  | T | G                     | rs10020037              | 7.90E-01 | 0.081 | 0.079 | 1.03 | 0.82  | -1.29    | 5.17E-05 | 0.110 | 0.092 | 1.23 | 1.02  | -1.48 | 1.04     | 7.90E-01 | ZNF827(dist=5975), LINC01095(dist=165025)           | intergenic     |
| 17 | 78414330  | C | T                     | rs72852674              | 8.23E-01 | 0.024 | 0.023 | 1.01 | 0.67  | -1.52    | 8.55E-06 | 0.063 | 0.048 | 1.33 | 1.04  | -1.7  | 0.95     | 8.24E-01 | ENDOV(dist=2446), NPTX1(dist=26303)                 | intergenic     |
| 15 | 77796228  | G | A                     | rs193064645             | 8.38E-01 | 0.029 | 0.031 | 0.95 | 0.66  | -1.37    | 2.82E-06 | 0.038 | 0.026 | 1.51 | 1.1   | -2.07 | 0.95     | 8.36E-01 | HMG20A(dist=18282), LINGO1(dist=109138)             | intergenic     |
| 12 | 6169494   | C | T                     | rs114046011             | 8.33E-01 | 0.042 | 0.042 | 0.99 | 0.73  | -1.34    | 3.68E-05 | 0.045 | 0.029 | 1.56 | 1.16  | -2.1  | 1.04     | 8.36E-01 | VVVF                                                | intronic       |
| 12 | 6166008   | A | T                     | rs71582861              | 8.47E-01 | 0.061 | 0.063 | 0.96 | 0.74  | -1.24    | 4.96E-05 | 0.061 | 0.042 | 1.47 | 1.14  | -1.89 | 1.03     | 8.50E-01 | VVVF                                                | intronic       |
| 20 | 31448648  | A | G                     | rs6141832               | 8.71E-01 | 0.023 | 0.021 | 1.10 | 0.72  | -1.67    | 4.07E-05 | 0.032 | 0.024 | 1.38 | 0.98  | -1.94 | 0.95     | 8.72E-01 | MAPRE1(dist=10437), SUN5(dist=122933)               | intergenic     |
| 12 | 6166174   | G | A                     | rs35302737              | 8.89E-01 | 0.061 | 0.064 | 0.95 | 0.74  | -1.23    | 4.89E-05 | 0.061 | 0.042 | 1.47 | 1.14  | -1.89 | 1.02     | 8.91E-01 | VVVF                                                | exonic         |
| 9  | 28561597  | A | G                     | rs577864267;rs150260809 | 8.90E-01 | 0.032 | 0.033 | 1.00 | 0.7   | -1.41    | 1.44E-05 | 0.044 | 0.029 | 1.54 | 1.14  | -2.07 | 1.03     | 8.92E-01 | LINGO2                                              | intronic       |
| 18 | 71891196  | A | C                     | rs9959367               | 9.03E-01 | 0.030 | 0.030 | 1.03 | 0.72  | -1.48    | 3.83E-05 | 0.043 | 0.035 | 1.23 | 0.91  | -1.65 | 0.97     | 9.03E-01 | TMM21(dist=64992), CYB5A(dist=29331)                | intergenic     |
| 12 | 6168738   | G | A                     | rs74457906              | 9.08E-01 | 0.043 | 0.044 | 0.97 | 0.72  | -1.32    | 4.24E-05 | 0.047 | 0.031 | 1.54 | 1.15  | -2.05 | 1.02     | 9.10E-01 | VVVF                                                | intronic       |
| 17 | 78408057  | C | T                     | rs41302844              | 9.21E-01 | 0.023 | 0.021 | 1.07 | 0.71  | -1.63    | 2.18E-06 | 0.064 | 0.048 | 1.36 | 1.06  | -1.73 | 1.02     | 9.22E-01 | ENDOV                                               | intronic       |
| 13 | 28167998  | G | C                     | rs150847642             | 9.23E-01 | 0.031 | 0.033 | 0.94 | 0.66  | -1.34    | 2.76E-05 | 0.034 | 0.022 | 1.53 | 1.09  | -2.14 | 1.02     | 9.25E-01 | LNK2                                                | intronic       |
| 17 | 78408213  | C | G                     | rs4494603               | 9.30E-01 | 0.023 | 0.021 | 1.07 | 0.7   | -1.63    | 2.22E-06 | 0.064 | 0.048 | 1.36 | 1.06  | -1.73 | 1.02     | 9.30E-01 | ENDOV                                               | intronic       |
| 19 | 10068797  | G | A                     | rs117391353             | 9.46E-01 | 0.044 | 0.044 | 0.99 | 0.73  | -1.34    | 3.32E-05 | 0.053 | 0.044 | 1.21 | 0.92  | -1.57 | 1.01     | 9.47E-01 | OLFM2(dist=21569), COL5A3(dist=1440)                | intergenic     |
| 1  | 21754488  | G | A                     | rs72476502              | 9.51E-01 | 0.052 | 0.047 | 1.11 | 0.84  | -1.48    | 3.85E-05 | 0.060 | 0.050 | 1.23 | 0.96  | -1.58 | 0.99     | 9.51E-01 | ECE1(dist=82454), NBPF3(dist=12095)                 | intergenic     |
| 17 | 78412974  | T | A                     | rs4564632               | 9.54E-01 | 0.029 | 0.029 | 1.02 | 0.71  | -1.48    | 5.31E-05 | 0.071 | 0.056 | 1.30 | 1.03  | -1.65 | 0.99     | 9.54E-01 | ENDOV(dist=1090), NPTX1(dist=27659)                 | intergenic     |
| 17 | 78408725  | G | A                     | rs41302934              | 9.58E-01 | 0.023 | 0.021 | 1.06 | 0.7   | -1.62    | 2.45E-06 | 0.064 | 0.048 | 1.36 | 1.06  | -1.73 | 1.01     | 9.58E-01 | ENDOV                                               | intronic       |
| 2  | 8009840   | C | T                     | rs114622424             | 9.68E-01 | 0.038 | 0.041 | 0.92 | 0.67  | -1.27    | 3.10E-06 | 0.039 | 0.025 | 1.60 | 1.16  | -2.2  | 1.01     | 9.68E-01 | LOC100506274(dist=419459), LOC101929551(dist=17058) | intergenic     |
| 1  | 8962232   | C | T                     | rs142077535             | 9.72E-01 | 0.038 | 0.041 | 0.91 | 0.66  | -1.26    | 3.62E-06 | 0.057 | 0.037 | 1.57 | 1.2   | -2.04 | 1.01     | 9.72E-01 | ENO1-AS1(dist=22289), CA6(dist=43661)               | intergenic     |
| 6  | 113909438 | G | T                     | rs190878388             | 9.74E-01 | 0.022 | 0.022 | 1.01 | 0.66  | -1.54    | 4.43E-05 | 0.030 | 0.020 | 1.52 | 1.07  | -2.17 | 1.01     | 9.75E-01 | RFPL4B(dist=1236940), LOC101927686(dist=35299)      | intergenic     |

Results for all association with p-values < 6.5x10<sup>-5</sup> in GWAS1 and GWAS2 for CD. Suggestive SNPs at established European loci (specifically <1 Mb of the maximal reported associations) for CD are indicated in bold.

Supplementary Table 1: Suggestive SNPs at established European loci (specifically <1 Mb of the maximal reported associations) for UC are indicated in bold

| Chr | Position  | A1 | A2 | SNP Name                | GWAS1 (Omni2.5) |           |              |      | GWAS2 (Axiom) |          |           |              | Combined |             | nearest_gene(s) | Annotation |                                            |                |
|-----|-----------|----|----|-------------------------|-----------------|-----------|--------------|------|---------------|----------|-----------|--------------|----------|-------------|-----------------|------------|--------------------------------------------|----------------|
|     |           |    |    |                         | P_value         | Case_Freq | Control_Freq | OR   | OR_CI         | P_Value  | Case_Freq | Control_Freq | OR       | OR_CI       |                 |            | OR                                         | P-value        |
| 6   | 32559063  | A  | C  | rs9270484               | 1.45E-07        | 0.448     | 0.356        | 0.68 | 0.58 - 0.8    | 4.41E-07 | 0.426     | 0.319        | 0.63     | 0.52 - 0.76 | 0.58            | 3.22E-12   | HLA-DRB1(dist=1450), HLA-DQA1(dist=46120)  | intergenic     |
| 6   | 32557435  | A  | C  | rs9270299               | 5.98E-08        | 0.284     | 0.207        | 0.66 | 0.55 - 0.79   | 1.06E-05 | 0.281     | 0.209        | 0.68     | 0.55 - 0.83 | 0.52            | 2.65E-11   | HLA-DRB1                                   | exonic         |
| 6   | 32552617  | G  | A  | rs28724138              | 4.62E-07        | 0.412     | 0.487        | 0.74 | 0.62 - 0.87   | 2.75E-06 | 0.572     | 0.482        | 0.70     | 0.58 - 0.84 | 0.57            | 4.70E-11   | HLA-DRB1                                   | intronic       |
| 6   | 32588416  | A  | T  | rs9271453               | 9.36E-07        | 0.389     | 0.296        | 0.66 | 0.56 - 0.78   | 1.94E-06 | 0.391     | 0.288        | 0.63     | 0.52 - 0.76 | 0.62            | 6.72E-11   | HLA-DRB1(dist=30803), HLA-DQA1(dist=16767) | intergenic     |
| 6   | 32586908  | G  | A  | rs9271367;rs386699490   | 6.49E-07        | 0.350     | 0.256        | 0.64 | 0.54 - 0.76   | 3.07E-06 | 0.367     | 0.269        | 0.63     | 0.52 - 0.77 | 0.62            | 7.24E-11   | HLA-DRB1(dist=29295), HLA-DQA1(dist=18425) | intergenic     |
| 6   | 32586732  | G  | C  | rs386699488;rs9271363   | 3.53E-09        | 0.282     | 0.184        | 0.57 | 0.48 - 0.69   | 5.20E-04 | 0.256     | 0.189        | 0.67     | 0.54 - 0.84 | 0.58            | 1.29E-10   | HLA-DRB1(dist=29119), HLA-DQA1(dist=18451) | intergenic     |
| 6   | 32587832  | A  | G  | rs9271418               | 1.98E-06        | 0.366     | 0.275        | 0.66 | 0.55 - 0.78   | 1.82E-06 | 0.386     | 0.283        | 0.63     | 0.52 - 0.76 | 0.62            | 1.32E-10   | HLA-DRB1(dist=30219), HLA-DQA1(dist=17351) | intergenic     |
| 6   | 32590498  | T  | G  | rs2105898               | 1.24E-08        | 0.299     | 0.202        | 0.59 | 0.49 - 0.71   | 3.12E-04 | 0.278     | 0.205        | 0.67     | 0.54 - 0.83 | 0.60            | 2.00E-10   | HLA-DRB1(dist=32885), HLA-DQA1(dist=14685) | intergenic     |
| 6   | 32576963  | G  | A  | rs202070262;rs9271133   | 6.42E-06        | 0.433     | 0.352        | 0.71 | 0.6 - 0.84    | 8.11E-07 | 0.405     | 0.304        | 0.64     | 0.53 - 0.78 | 0.61            | 2.09E-10   | HLA-DRB1(dist=19350), HLA-DQA1(dist=28220) | intergenic     |
| 6   | 32486973  | A  | G  | rs116448083;rs200881163 | 1.58E-07        | 0.212     | 0.295        | 0.64 | 0.53 - 0.78   | 4.28E-05 | 0.223     | 0.300        | 0.67     | 0.54 - 0.84 | 0.58            | 2.19E-10   | HLA-DRB5                                   | intronic       |
| 6   | 32480536  | A  | C  | rs76389874              | 2.76E-08        | 0.384     | 0.476        | 0.69 | 0.58 - 0.81   | 2.07E-04 | 0.529     | 0.451        | 0.73     | 0.61 - 0.88 | 0.60            | 2.68E-10   | HLA-DRA(dist=67710), HLA-DRB5(dist=4618)   | intergenic     |
| 6   | 32589523  | C  | G  | rs9271513               | 1.46E-08        | 0.299     | 0.202        | 0.60 | 0.5 - 0.71    | 3.71E-04 | 0.276     | 0.204        | 0.67     | 0.54 - 0.83 | 0.60            | 2.77E-10   | HLA-DRB1(dist=31910), HLA-DQA1(dist=15660) | intergenic     |
| 6   | 32627833  | A  | G  | rs1770                  | 1.23E-06        | 0.235     | 0.330        | 0.62 | 0.52 - 0.75   | 9.85E-06 | 0.224     | 0.323        | 0.64     | 0.49 - 0.76 | 0.64            | 3.64E-10   | HLA-DQB1                                   | UTR3           |
| 6   | 32537900  | A  | G  | rs115351077             | 1.20E-05        | 0.373     | 0.444        | 0.75 | 0.63 - 0.88   | 9.97E-07 | 0.388     | 0.482        | 0.68     | 0.56 - 0.82 | 0.59            | 4.22E-10   | HLA-DRB6(dist=10121), HLA-DRB1(dist=8647)  | intergenic     |
| 6   | 32629889  | G  | A  | rs1049087;rs386699585   | 3.68E-07        | 0.246     | 0.344        | 0.62 | 0.52 - 0.75   | 3.98E-05 | 0.236     | 0.329        | 0.63     | 0.51 - 0.79 | 0.64            | 4.31E-10   | HLA-DQB1                                   | exonic         |
| 6   | 32485784  | G  | C  | rs189231639             | 4.08E-08        | 0.396     | 0.314        | 0.70 | 0.59 - 0.83   | 2.68E-04 | 0.330     | 0.263        | 0.72     | 0.59 - 0.88 | 0.57            | 5.54E-10   | HLA-DRB5                                   | intronic       |
| 6   | 32556439  | C  | T  | rs28724204              | 3.23E-06        | 0.193     | 0.251        | 0.72 | 0.59 - 0.88   | 7.46E-06 | 0.225     | 0.310        | 0.65     | 0.52 - 0.81 | 0.55            | 6.61E-10   | HLA-DRB1                                   | intronic       |
| 6   | 32537608  | T  | C  | rs111437237             | 1.82E-05        | 0.294     | 0.352        | 0.77 | 0.64 - 0.92   | 1.57E-06 | 0.299     | 0.398        | 0.65     | 0.53 - 0.79 | 0.59            | 7.85E-10   | HLA-DRB6(dist=9829), HLA-DRB1(dist=8939)   | intergenic     |
| 6   | 32455381  | G  | C  | rs79463993              | 1.46E-06        | 0.345     | 0.425        | 0.71 | 0.6 - 0.84    | 2.17E-05 | 0.322     | 0.405        | 0.70     | 0.57 - 0.85 | 0.60            | 8.64E-10   | HLA-DRA(dist=42555), HLA-DRB5(dist=29773)  | intergenic     |
| 6   | 32628030  | G  | A  | rs9273471               | 2.55E-06        | 0.248     | 0.341        | 0.64 | 0.53 - 0.77   | 1.25E-05 | 0.232     | 0.331        | 0.61     | 0.49 - 0.76 | 0.65            | 8.75E-10   | HLA-DQB1                                   | intronic       |
| 19  | 52400451  | G  | A  | rs78090981              | 9.65E-06        | 0.054     | 0.026        | 2.16 | 1.46 - 3.21   | 1.54E-05 | 0.051     | 0.022        | 2.42     | 1.55 - 3.78 | 3.64            | 9.93E-10   | ZNF649, ZNF649-AS1                         | ncRNA_intronic |
| 19  | 52400935  | A  | G  | rs116142355             | 1.01E-05        | 0.053     | 0.025        | 2.17 | 1.46 - 3.22   | 1.47E-05 | 0.051     | 0.022        | 2.42     | 1.55 - 3.78 | 3.64            | 9.99E-10   | ZNF649, ZNF649-AS1                         | ncRNA_intronic |
| 19  | 52401181  | C  | T  | rs149246580             | 1.01E-05        | 0.053     | 0.025        | 2.17 | 1.46 - 3.22   | 1.46E-05 | 0.051     | 0.022        | 2.42     | 1.55 - 3.78 | 3.64            | 1.00E-09   | ZNF649, ZNF649-AS1                         | ncRNA_intronic |
| 19  | 52399243  | C  | T  | rs116148256             | 9.85E-06        | 0.055     | 0.026        | 2.15 | 1.45 - 3.18   | 1.81E-05 | 0.051     | 0.022        | 2.41     | 1.54 - 3.76 | 3.58            | 1.18E-09   | ZNF649, ZNF649-AS1                         | ncRNA_intronic |
| 6   | 32458962  | C  | A  | rs113496047             | 2.67E-06        | 0.519     | 0.447        | 0.75 | 0.64 - 0.88   | 1.89E-05 | 0.476     | 0.393        | 0.71     | 0.59 - 0.86 | 0.60            | 1.28E-09   | HLA-DRA(dist=46136), HLA-DRB5(dist=26192)  | intergenic     |
| 6   | 32485051  | A  | T  | rs115545331             | 1.44E-05        | 0.182     | 0.242        | 0.70 | 0.57 - 0.86   | 4.37E-06 | 0.195     | 0.281        | 0.62     | 0.49 - 0.78 | 0.58            | 1.64E-09   | HLA-DRB5                                   | downstream     |
| 6   | 32631295  | G  | A  | rs9274247               | 6.86E-06        | 0.222     | 0.305        | 0.65 | 0.54 - 0.79   | 9.21E-06 | 0.205     | 0.297        | 0.61     | 0.48 - 0.77 | 0.63            | 1.66E-09   | HLA-DQB1                                   | intronic       |
| 6   | 32552816  | C  | A  | rs34043063              | 1.45E-06        | 0.184     | 0.250        | 0.68 | 0.55 - 0.83   | 5.36E-05 | 0.176     | 0.252        | 0.64     | 0.5 - 0.81  | 0.57            | 1.91E-09   | HLA-DRB1                                   | intronic       |
| 6   | 32627852  | G  | A  | rs1130420               | 4.94E-06        | 0.228     | 0.316        | 0.64 | 0.53 - 0.78   | 1.50E-05 | 0.212     | 0.305        | 0.61     | 0.49 - 0.77 | 0.64            | 1.91E-09   | HLA-DQB1                                   | UTR3           |
| 6   | 32627850  | T  | C  | rs3210176               | 6.37E-06        | 0.222     | 0.308        | 0.64 | 0.53 - 0.77   | 1.29E-05 | 0.203     | 0.295        | 0.61     | 0.48 - 0.77 | 0.64            | 2.15E-09   | HLA-DQB1                                   | UTR3           |
| 6   | 32550322  | A  | C  | rs9269853               | 2.19E-05        | 0.305     | 0.241        | 0.72 | 0.6 - 0.86    | 3.88E-06 | 0.312     | 0.228        | 0.65     | 0.53 - 0.79 | 0.59            | 2.21E-09   | HLA-DRB1                                   | intronic       |
| 6   | 32550331  | T  | G  | rs9269854               | 2.20E-05        | 0.305     | 0.241        | 0.72 | 0.6 - 0.86    | 3.89E-06 | 0.312     | 0.228        | 0.65     | 0.53 - 0.79 | 0.59            | 2.22E-09   | HLA-DRB1                                   | intronic       |
| 19  | 52391280  | T  | C  | rs75075099              | 1.68E-05        | 0.054     | 0.026        | 2.13 | 1.44 - 3.15   | 2.70E-05 | 0.051     | 0.022        | 2.37     | 1.52 - 3.69 | 3.41            | 2.98E-09   | ZNF649, ZNF649-AS1                         | Downstream     |
| 6   | 32458822  | A  | T  | rs111779713             | 2.07E-06        | 0.366     | 0.443        | 0.72 | 0.61 - 0.86   | 6.38E-05 | 0.425     | 0.501        | 0.74     | 0.61 - 0.89 | 0.61            | 3.07E-09   | HLA-DRA(dist=45996), HLA-DRB5(dist=26332)  | intergenic     |
| 6   | 32541094  | C  | G  | rs76924329              | 8.44E-06        | 0.231     | 0.299        | 0.70 | 0.58 - 0.85   | 1.84E-05 | 0.227     | 0.311        | 0.65     | 0.52 - 0.81 | 0.60            | 3.60E-09   | HLA-DRB6(dist=13315), HLA-DRB1(dist=5453)  | intergenic     |
| 6   | 32480479  | A  | T  | rs114516102             | 1.55E-07        | 0.334     | 0.257        | 0.69 | 0.58 - 0.82   | 7.77E-04 | 0.258     | 0.200        | 0.72     | 0.58 - 0.89 | 0.58            | 4.15E-09   | HLA-DRA(dist=67653), HLA-DRB5(dist=4675)   | intergenic     |
| 3   | 115528296 | C  | T  | rs72947885              | 5.19E-08        | 0.099     | 0.054        | 1.91 | 1.43 - 2.56   | 8.07E-03 | 0.080     | 0.051        | 1.62     | 1.14 - 2.3  | 2.42            | 4.48E-09   | LSAMP(NM_002338.c.*868G>A)                 | UTR3           |
| 6   | 32632171  | C  | T  | rs9274322               | 6.33E-06        | 0.242     | 0.315        | 0.69 | 0.57 - 0.84   | 3.20E-05 | 0.311     | 0.408        | 0.66     | 0.54 - 0.8  | 0.63            | 4.60E-09   | HLA-DQB1                                   | intronic       |
| 6   | 32632303  | G  | A  | rs9274337               | 6.79E-06        | 0.147     | 0.210        | 0.65 | 0.52 - 0.82   | 3.06E-05 | 0.185     | 0.267        | 0.63     | 0.49 - 0.79 | 0.60            | 4.76E-09   | HLA-DQB1                                   | intronic       |
| 6   | 32544351  | A  | T  | rs9269558               | 4.25E-05        | 0.322     | 0.256        | 0.73 | 0.61 - 0.87   | 4.39E-06 | 0.318     | 0.233        | 0.65     | 0.53 - 0.8  | 0.60            | 4.79E-09   | HLA-DRB6(dist=16572), HLA-DRB1(dist=2196)  | intergenic     |
| 6   | 32458797  | G  | T  | rs111966786             | 1.96E-05        | 0.488     | 0.421        | 0.76 | 0.65 - 0.9    | 1.12E-05 | 0.485     | 0.402        | 0.72     | 0.59 - 0.86 | 0.61            | 5.13E-09   | HLA-DRA(dist=45971), HLA-DRB5(dist=26357)  | intergenic     |
| 6   | 32558724  | A  | T  | rs9270439               | 1.79E-04        | 0.444     | 0.380        | 0.77 | 0.65 - 0.9    | 8.30E-07 | 0.420     | 0.319        | 0.65     | 0.53 - 0.78 | 0.63            | 5.47E-09   | HLA-DRB1(dist=1111), HLA-DQA1(dist=46459)  | intergenic     |
| 6   | 32544577  | C  | T  | rs9269568               | 4.30E-05        | 0.327     | 0.261        | 0.72 | 0.61 - 0.86   | 5.73E-06 | 0.323     | 0.238        | 0.65     | 0.54 - 0.8  | 0.61            | 6.10E-09   | HLA-DRB6(dist=16798), HLA-DRB1(dist=1970)  | intergenic     |
| 6   | 32524150  | G  | C  | rs146662207             | 2.78E-06        | 0.223     | 0.291        | 0.70 | 0.57 - 0.84   | 1.10E-04 | 0.260     | 0.328        | 0.72     | 0.58 - 0.89 | 0.59            | 6.53E-09   | HLA-DRB6                                   | ncRNA_intronic |
| 6   | 32544561  | G  | A  | rs9269566               | 4.77E-05        | 0.321     | 0.256        | 0.73 | 0.61 - 0.87   | 6.07E-06 | 0.319     | 0.235        | 0.66     | 0.54 - 0.8  | 0.61            | 6.98E-09   | HLA-DRB6(dist=16782), HLA-DRB1(dist=1986)  | intergenic     |
| 6   | 32540371  | T  | A  | rs9269341               | 5.29E-04        | 0.407     | 0.347        | 0.77 | 0.66 - 0.92   | 2.54E-07 | 0.418     | 0.312        | 0.63     | 0.52 - 0.76 | 0.63            | 7.51E-09   | HLA-DRB6(dist=12592), HLA-DRB1(dist=6176)  | intergenic     |
| 6   | 32567356  | A  | G  | rs9270709               | 4.30E-05        | 0.363     | 0.292        | 0.72 | 0.61 - 0.86   | 7.97E-06 | 0.349     | 0.258        | 0.65     | 0.53 - 0.79 | 0.63            | 8.16E-09   | HLA-DRB1(dist=9743), HLA-DQA1(dist=37827)  | intergenic     |
| 6   | 32546866  | T  | C  | rs9269693               | 1.46E-05        | 0.305     | 0.238        | 0.71 | 0.59 - 0.85   | 2.83E-05 | 0.284     | 0.213        | 0.68     | 0.55 - 0.84 | 0.60            | 8.73E-09   | HLA-DRB1                                   | UTR3           |
| 6   | 32632457  | C  | T  | rs9274357               | 6.38E-07        | 0.135     | 0.204        | 0.61 | 0.48 - 0.77   | 3.84E-04 | 0.186     | 0.255        | 0.67     | 0.52 - 0.84 | 0.60            | 8.79E-09   | HLA-DQB1                                   | intronic       |
| 6   | 32539012  | T  | C  | rs66859861              | 2.14E-05        | 0.283     | 0.223        | 0.73 | 0.61 - 0.88   | 2.03E-05 | 0.281     | 0.205        | 0.66     | 0.53 - 0.81 | 0.58            | 8.80E-09   | HLA-DRB6(dist=11233), HLA-DRB1(dist=7535)  | intergenic     |
| 6   | 32546743  | C  | T  | rs1064707               | 1.30E-05        | 0.305     | 0.237        | 0.71 | 0.59 - 0.85   | 3.43E-05 | 0.283     | 0.213        | 0.69     | 0.56 - 0.85 | 0.60            | 9.29E-09   | HLA-DRB1                                   | UTR3           |
| 6   | 32495781  | A  | T  | rs183233576             | 8.20E-08        | 0.389     | 0.310        | 0.71 | 0.6 - 0.83    |          |           |              |          |             |                 |            |                                            |                |

|    |          |   |   |                        |          |       |       |      |      |       |          |       |       |      |      |       |      |          |                                            |                |
|----|----------|---|---|------------------------|----------|-------|-------|------|------|-------|----------|-------|-------|------|------|-------|------|----------|--------------------------------------------|----------------|
| 6  | 32503128 | G | A | rs112652539            | 1.34E-04 | 0.368 | 0.307 | 0.76 | 0.64 | -0.9  | 4.12E-06 | 0.344 | 0.257 | 0.66 | 0.54 | -0.81 | 0.61 | 1.37E-08 | HLA-DRB5(dist=5122), HLA-DRB6(dist=17362)  | intergenic     |
| 6  | 32484777 | T | C | rs75983593             | 1.72E-07 | 0.382 | 0.462 | 0.72 | 0.61 | -0.85 | 1.97E-03 | 0.523 | 0.459 | 0.77 | 0.64 | -0.93 | 0.62 | 1.39E-08 | HLA-DRB5                                   | downstream     |
| 6  | 32524152 | A | T | rs140125785            | 6.23E-06 | 0.210 | 0.276 | 0.70 | 0.57 | -0.85 | 1.23E-04 | 0.236 | 0.306 | 0.70 | 0.56 | -0.87 | 0.60 | 1.46E-08 | HLA-DRB6                                   | ncRNA_intronic |
| 6  | 32518310 | A | G | rs66468365             | 1.79E-06 | 0.279 | 0.210 | 0.69 | 0.57 | -0.83 | 3.84E-04 | 0.240 | 0.179 | 0.69 | 0.56 | -0.86 | 0.58 | 1.48E-08 | HLA-DRB5(dist=20304), HLA-DRB6(dist=2180)  | intergenic     |
| 6  | 32481332 | C | T | rs112333689            | 2.20E-07 | 0.317 | 0.238 | 0.67 | 0.56 | -0.81 | 2.00E-03 | 0.227 | 0.171 | 0.70 | 0.56 | -0.88 | 0.60 | 1.50E-08 | HLA-DRA(dist=68506), HLA-DRB5(dist=3822)   | intergenic     |
| 6  | 32455311 | T | C | rs111984068            | 2.93E-07 | 0.337 | 0.416 | 0.71 | 0.6  | -0.85 | 1.39E-03 | 0.414 | 0.482 | 0.76 | 0.63 | -0.92 | 0.63 | 1.54E-08 | HLA-DRA(dist=42485), HLA-DRB5(dist=29843)  | intergenic     |
| 6  | 32574202 | C | T | rs9270992              | 8.29E-05 | 0.310 | 0.239 | 0.70 | 0.59 | -0.84 | 7.41E-06 | 0.333 | 0.243 | 0.64 | 0.53 | -0.78 | 0.65 | 1.55E-08 | HLA-DRB1(dist=16589), HLA-DQA1(dist=30981) | intergenic     |
| 19 | 52391404 | T | C | rs75577191             | 9.04E-05 | 0.052 | 0.028 | 1.88 | 1.27 | -2.79 | 2.72E-05 | 0.051 | 0.022 | 2.37 | 1.52 | -3.69 | 3.41 | 1.57E-08 | ZNF649, ZNF649-AS1                         | ncRNA_intronic |
| 6  | 32544799 | A | G | rs9269583              | 2.11E-07 | 0.237 | 0.167 | 0.65 | 0.53 | -0.79 | 2.20E-03 | 0.187 | 0.139 | 0.70 | 0.55 | -0.9  | 0.56 | 1.60E-08 | HLA-DRB6(dist=17020), HLA-DRB1(dist=1748)  | intergenic     |
| 6  | 32507047 | T | C | rs76493232             | 3.43E-06 | 0.376 | 0.304 | 0.73 | 0.61 | -0.86 | 2.37E-04 | 0.337 | 0.270 | 0.73 | 0.6  | -0.89 | 0.61 | 1.61E-08 | HLA-DRB5(dist=9041), HLA-DRB6(dist=13443)  | intergenic     |
| 6  | 32545102 | T | C | rs9269602              | 6.93E-05 | 0.303 | 0.242 | 0.73 | 0.61 | -0.88 | 1.03E-05 | 0.281 | 0.208 | 0.67 | 0.55 | -0.83 | 0.59 | 1.68E-08 | HLA-DRB6(dist=17323), HLA-DRB1(dist=1445)  | intergenic     |
| 6  | 32478510 | A | G | rs137969124            | 1.91E-08 | 0.191 | 0.129 | 1.60 | 1.29 | -1.98 | 1.16E-02 | 0.130 | 0.091 | 1.49 | 1.12 | -1.97 | 1.92 | 1.69E-08 | HLA-DRA(dist=65684), HLA-DRB5(dist=6644)   | intergenic     |
| 6  | 32644388 | A | G | rs9275033              | 1.49E-06 | 0.455 | 0.374 | 0.72 | 0.61 | -0.84 | 4.75E-04 | 0.449 | 0.369 | 0.72 | 0.6  | -0.87 | 0.65 | 1.72E-08 | HLA-DQB1(dist=9922), HLA-DQA2(dist=64775)  | intergenic     |
| 6  | 32537570 | A | G | rs111254573            | 5.17E-07 | 0.172 | 0.241 | 0.65 | 0.53 | -0.81 | 1.30E-03 | 0.158 | 0.216 | 0.68 | 0.53 | -0.88 | 0.59 | 1.74E-08 | HLA-DRB6(dist=9791), HLA-DRB1(dist=8977)   | intergenic     |
| 6  | 32567351 | A | G | rs9270707              | 2.06E-07 | 0.259 | 0.185 | 0.65 | 0.54 | -0.78 | 2.12E-03 | 0.224 | 0.169 | 0.71 | 0.56 | -0.88 | 0.59 | 1.75E-08 | HLA-DRB1(dist=9738), HLA-DQA1(dist=37832)  | intergenic     |
| 6  | 32478393 | G | A | rs111885771            | 1.77E-07 | 0.436 | 0.356 | 0.71 | 0.6  | -0.84 | 2.39E-03 | 0.378 | 0.320 | 0.77 | 0.64 | -0.94 | 0.61 | 1.76E-08 | HLA-DRA(dist=65567), HLA-DRB5(dist=6761)   | intergenic     |
| 6  | 32480472 | G | T | rs79388859;rs202116092 | 7.71E-07 | 0.344 | 0.270 | 0.71 | 0.59 | -0.84 | 9.25E-04 | 0.260 | 0.202 | 0.72 | 0.58 | -0.89 | 0.60 | 1.76E-08 | HLA-DRA(dist=67646), HLA-DRB5(dist=4682)   | intergenic     |
| 6  | 32661798 | A | G | rs1144037519           | 9.44E-08 | 0.158 | 0.103 | 1.64 | 1.3  | -2.07 | 3.76E-03 | 0.140 | 0.097 | 1.52 | 1.16 | -2    | 1.96 | 1.79E-08 | HLA-DQB1(dist=27332), HLA-DQA2(dist=47365) | intergenic     |
| 6  | 32545604 | C | T | rs9269627              | 5.46E-07 | 0.241 | 0.174 | 0.66 | 0.54 | -0.8  | 1.17E-03 | 0.199 | 0.147 | 0.69 | 0.55 | -0.88 | 0.57 | 1.80E-08 | HLA-DRB1                                   | downstream     |
| 6  | 32518312 | A | G | rs66482188             | 3.32E-06 | 0.280 | 0.214 | 0.70 | 0.58 | -0.84 | 2.68E-04 | 0.253 | 0.188 | 0.68 | 0.55 | -0.85 | 0.59 | 1.83E-08 | HLA-DRB5(dist=20306), HLA-DRB6(dist=2178)  | intergenic     |
| 6  | 32484491 | C | T | rs75267018             | 8.16E-07 | 0.358 | 0.433 | 0.73 | 0.62 | -0.86 | 9.34E-04 | 0.401 | 0.467 | 0.76 | 0.63 | -0.92 | 0.62 | 1.93E-08 | HLA-DRB5                                   | downstream     |
| 6  | 32471899 | C | T | rs78486495             | 7.71E-07 | 0.120 | 0.181 | 0.62 | 0.48 | -0.79 | 1.09E-03 | 0.122 | 0.174 | 0.66 | 0.5  | -0.88 | 0.55 | 1.94E-08 | HLA-DRA(dist=59073), HLA-DRB5(dist=13255)  | intergenic     |
| 6  | 32482176 | C | A | rs113147593            | 1.14E-06 | 0.492 | 0.415 | 0.73 | 0.62 | -0.87 | 7.11E-04 | 0.434 | 0.369 | 0.76 | 0.63 | -0.92 | 0.62 | 1.96E-08 | HLA-DRA(dist=69350), HLA-DRB5(dist=2978)   | intergenic     |
| 6  | 32524626 | C | T | rs71536548             | 3.95E-08 | 0.390 | 0.303 | 0.68 | 0.58 | -0.81 | 8.14E-03 | 0.282 | 0.235 | 0.78 | 0.63 | -0.96 | 0.61 | 1.99E-08 | HLA-DRB6                                   | ncRNA_intronic |
| 6  | 32550164 | A | G | rs9269841              | 5.55E-07 | 0.248 | 0.178 | 0.66 | 0.54 | -0.8  | 1.44E-03 | 0.200 | 0.149 | 0.70 | 0.55 | -0.88 | 0.58 | 2.14E-08 | HLA-DRB1                                   | intronic       |
| 6  | 32587391 | C | T | rs9271383              | 2.13E-04 | 0.427 | 0.506 | 0.73 | 0.62 | -0.86 | 2.91E-06 | 0.591 | 0.482 | 0.64 | 0.53 | -0.78 | 0.69 | 2.17E-08 | HLA-DRB1(dist=29778), HLA-DQA1(dist=17792) | intergenic     |
| 6  | 32569027 | G | A | rs9270776              | 2.15E-04 | 0.333 | 0.268 | 0.73 | 0.62 | -0.87 | 3.27E-06 | 0.331 | 0.241 | 0.64 | 0.53 | -0.78 | 0.64 | 2.19E-08 | HLA-DRB1(dist=11414), HLA-DQA1(dist=36156) | intergenic     |
| 6  | 32550550 | C | G | rs28724008             | 1.33E-05 | 0.136 | 0.196 | 0.65 | 0.51 | -0.81 | 9.29E-05 | 0.136 | 0.207 | 0.60 | 0.46 | -0.79 | 0.59 | 2.25E-08 | HLA-DRB1                                   | intronic       |
| 6  | 32569108 | C | T | rs9270780              | 1.85E-04 | 0.320 | 0.255 | 0.73 | 0.61 | -0.87 | 4.32E-06 | 0.329 | 0.241 | 0.65 | 0.53 | -0.79 | 0.64 | 2.29E-08 | HLA-DRB1(dist=11495), HLA-DQA1(dist=36075) | intergenic     |
| 6  | 32560520 | G | A | rs9270552              | 1.53E-04 | 0.300 | 0.233 | 0.71 | 0.59 | -0.85 | 5.72E-06 | 0.328 | 0.239 | 0.64 | 0.53 | -0.79 | 0.64 | 2.30E-08 | HLA-DRB1(dist=2907), HLA-DQA1(dist=44663)  | intergenic     |
| 6  | 32549259 | G | A | rs9269795              | 6.67E-07 | 0.239 | 0.172 | 0.66 | 0.55 | -0.81 | 1.30E-03 | 0.198 | 0.147 | 0.69 | 0.55 | -0.88 | 0.57 | 2.41E-08 | HLA-DRB1                                   | intronic       |
| 6  | 32559725 | T | C | rs9270537              | 2.78E-04 | 0.310 | 0.245 | 0.73 | 0.61 | -0.87 | 2.76E-06 | 0.340 | 0.246 | 0.63 | 0.52 | -0.77 | 0.64 | 2.44E-08 | HLA-DRB1(dist=2112), HLA-DQA1(dist=45458)  | intergenic     |
| 6  | 32481392 | A | T | rs112582516            | 5.23E-06 | 0.341 | 0.271 | 0.72 | 0.6  | -0.85 | 2.56E-04 | 0.264 | 0.198 | 0.69 | 0.56 | -0.85 | 0.61 | 2.45E-08 | HLA-DRA(dist=68566), HLA-DRB5(dist=3762)   | intergenic     |
| 6  | 32560523 | A | G | rs9270553              | 1.62E-04 | 0.300 | 0.234 | 0.71 | 0.59 | -0.85 | 5.79E-06 | 0.328 | 0.239 | 0.64 | 0.53 | -0.79 | 0.64 | 2.47E-08 | HLA-DRB1(dist=2910), HLA-DQA1(dist=44660)  | intergenic     |
| 6  | 32627795 | A | G | rs1766                 | 1.76E-06 | 0.306 | 0.404 | 0.65 | 0.55 | -0.78 | 7.02E-04 | 0.305 | 0.385 | 0.70 | 0.57 | -0.86 | 0.68 | 2.53E-08 | HLA-DQB1                                   | UTR3           |
| 6  | 32588877 | A | G | rs9271481              | 5.70E-07 | 0.211 | 0.138 | 0.60 | 0.49 | -0.74 | 1.65E-03 | 0.195 | 0.143 | 0.68 | 0.54 | -0.87 | 0.59 | 2.55E-08 | HLA-DRB1(dist=31264), HLA-DQA1(dist=16306) | intergenic     |
| 6  | 32538621 | T | A | rs72492352             | 9.85E-05 | 0.299 | 0.239 | 0.74 | 0.62 | -0.88 | 1.37E-05 | 0.321 | 0.241 | 0.67 | 0.55 | -0.82 | 0.61 | 2.57E-08 | HLA-DRB6(dist=10842), HLA-DRB1(dist=7926)  | intergenic     |
| 6  | 32551112 | G | A | rs9269897              | 9.96E-05 | 0.357 | 0.293 | 0.75 | 0.63 | -0.89 | 1.12E-05 | 0.318 | 0.240 | 0.68 | 0.55 | -0.83 | 0.62 | 2.69E-08 | HLA-DRB1                                   | intronic       |
| 6  | 32567155 | G | A | rs386699437;rs9270696  | 2.70E-04 | 0.309 | 0.247 | 0.73 | 0.61 | -0.87 | 3.53E-06 | 0.349 | 0.257 | 0.65 | 0.53 | -0.79 | 0.64 | 2.71E-08 | HLA-DRB1(dist=9542), HLA-DQA1(dist=38028)  | intergenic     |
| 6  | 32458277 | T | C | rs57053495             | 7.29E-06 | 0.425 | 0.358 | 0.75 | 0.64 | -0.89 | 2.09E-04 | 0.408 | 0.338 | 0.74 | 0.61 | -0.9  | 0.62 | 2.76E-08 | HLA-DRA(dist=45451), HLA-DRB5(dist=26877)  | intergenic     |
| 6  | 32546132 | G | A | rs9269655              | 6.62E-05 | 0.300 | 0.239 | 0.73 | 0.61 | -0.88 | 2.10E-05 | 0.293 | 0.221 | 0.68 | 0.56 | -0.84 | 0.60 | 2.76E-08 | HLA-DRB1                                   | downstream     |
| 6  | 32527850 | C | G | rs150088970            | 1.04E-07 | 0.208 | 0.151 | 1.48 | 1.2  | -1.82 | 6.22E-03 | 0.145 | 0.104 | 1.46 | 1.12 | -1.92 | 1.94 | 2.78E-08 | HLA-DRB6                                   | upstream       |
| 6  | 32482181 | C | T | rs111874278            | 2.86E-07 | 0.434 | 0.355 | 0.72 | 0.61 | -0.85 | 2.63E-03 | 0.362 | 0.305 | 0.77 | 0.64 | -0.94 | 0.63 | 2.81E-08 | HLA-DRA(dist=69355), HLA-DRB5(dist=2973)   | intergenic     |
| 6  | 32560222 | C | T | rs28366279             | 2.05E-04 | 0.315 | 0.250 | 0.73 | 0.61 | -0.87 | 5.06E-06 | 0.332 | 0.242 | 0.64 | 0.53 | -0.79 | 0.64 | 2.82E-08 | HLA-DRB1(dist=2609), HLA-DQA1(dist=44961)  | intergenic     |
| 6  | 32576687 | T | C | rs9271109              | 1.38E-04 | 0.318 | 0.250 | 0.72 | 0.6  | -0.86 | 8.60E-06 | 0.325 | 0.237 | 0.64 | 0.53 | -0.79 | 0.65 | 2.83E-08 | HLA-DRB1(dist=19074), HLA-DQA1(dist=28496) | intergenic     |
| 6  | 32545248 | C | A | rs9269611              | 7.21E-05 | 0.337 | 0.273 | 0.74 | 0.62 | -0.88 | 2.00E-05 | 0.301 | 0.226 | 0.68 | 0.55 | -0.83 | 0.62 | 2.95E-08 | HLA-DRB6(dist=17469), HLA-DRB1(dist=1299)  | intergenic     |
| 6  | 32566743 | A | G | rs9270679              | 2.28E-04 | 0.307 | 0.244 | 0.73 | 0.61 | -0.87 | 5.01E-06 | 0.343 | 0.252 | 0.65 | 0.53 | -0.79 | 0.64 | 2.96E-08 | HLA-DRB1(dist=9130), HLA-DQA1(dist=38440)  | intergenic     |
| 6  | 32569025 | C | T | rs9270775              | 2.90E-04 | 0.335 | 0.271 | 0.74 | 0.62 | -0.88 | 3.21E-06 | 0.331 | 0.241 | 0.64 | 0.53 | -0.78 | 0.64 | 2.96E-08 | HLA-DRB1(dist=11412), HLA-DQA1(dist=36158) | intergenic     |
| 6  | 32587768 | G | A | rs9271413              | 6.66E-07 | 0.211 | 0.139 | 0.60 | 0.49 | -0.74 | 1.68E-03 | 0.197 | 0.144 | 0.69 | 0.54 | -0.87 | 0.59 | 2.97E-08 | HLA-DRB1(dist=30155), HLA-DQA1(dist=17415) | intergenic     |
| 6  | 32574840 | T | G | rs9271020              | 1.91E-04 | 0.305 | 0.238 | 0.71 | 0.6  | -0.85 | 6.09E-06 | 0.336 | 0.243 | 0.64 | 0.52 | -0.78 | 0.65 | 2.98E-08 | HLA-DRB1(dist=17227), HLA-DQA1(dist=30343) | intergenic     |
| 6  | 32489354 | C | T | rs112742095            | 6.43E-06 | 0.301 | 0.233 | 0.71 | 0.59 | -0.84 | 2.59E-04 | 0.236 | 0.173 | 0.68 | 0.54 | -0.85 | 0.60 | 2.98E-08 | HLA-DRB5                                   | intronic       |
| 6  | 32587897 | G | T | rs9271423              | 5.90E-07 | 0.212 | 0.139 | 0.60 | 0.49 | -0.74 | 1.87E-03 | 0.194 | 0.142 | 0.69 | 0.54 | -0.87 | 0.59 | 3.02E-08 | HLA-DRB1(dist=30284), HLA-DQA1(dist=17286) | intergenic     |
| 6  | 32548178 | A | G | rs9269755              | 4.59E-05 | 0.304 | 0.241 | 0.73 | 0.61 | -0.87 | 3.68E-05 | 0.286 | 0.215 | 0.69 | 0.56 | -0.84 | 0.61 | 3.15E-08 | HLA-DRB1                                   | intronic       |
| 6  | 32576688 | G | A | rs9271110              | 1.39E-04 | 0.318 | 0.251 | 0.72 | 0.6  | -0.86 | 9.87E-06 | 0.325 | 0.237 | 0.64 | 0.53 | -0.79 | 0.65 | 3.16E-08 | HLA-DRB1(dist=19075), HLA-DQA1(dist=28495) | intergenic     |
| 6  | 32498988 | C | T | rs185367554            | 9.66E-05 | 0.195 | 0.250 | 0.72 | 0.59 | -0.89 | 1.70E-05 | 0.205 | 0.288 | 0.64 | 0.51 | -0.8  | 0.62 | 3.19E-08 | HLA-DRB5                                   | upstream       |
| 6  | 32510733 | C | T | rs138222522            | 4.11E-05 | 0.160 | 0.218 | 0.69 | 0.55 | -0.85 | 4.02E-05 | 0.148 | 0.219 | 0.62 | 0.48 |       |      |          |                                            |                |

|   |          |   |   |                       |          |       |       |      |      |       |          |       |       |      |      |       |      |          |                                                     |            |
|---|----------|---|---|-----------------------|----------|-------|-------|------|------|-------|----------|-------|-------|------|------|-------|------|----------|-----------------------------------------------------|------------|
| 6 | 32612397 | A | G | rs6927022             | 2.01E-05 | 0.284 | 0.363 | 0.70 | 0.58 | -0.83 | 1.14E-04 | 0.285 | 0.373 | 0.67 | 0.54 | -0.82 | 0.67 | 3.90E-08 | HLA-DQA1                                            | downstream |
| 6 | 32569050 | A | G | rs9270778             | 3.58E-04 | 0.330 | 0.267 | 0.74 | 0.62 | -0.88 | 3.29E-06 | 0.331 | 0.241 | 0.64 | 0.53 | -0.78 | 0.65 | 3.91E-08 | HLA-DRB1(dist=11437), HLA-DQA1(dist=36133)          | intergenic |
| 6 | 32484463 | T | A | rs115343758           | 1.83E-06 | 0.336 | 0.410 | 0.73 | 0.62 | -0.87 | 9.72E-04 | 0.379 | 0.445 | 0.76 | 0.63 | -0.92 | 0.62 | 3.92E-08 | HLA-DRB5                                            | downstream |
| 6 | 32550860 | T | C | rs9269876             | 3.68E-04 | 0.330 | 0.272 | 0.76 | 0.64 | -0.9  | 3.74E-06 | 0.322 | 0.236 | 0.65 | 0.53 | -0.8  | 0.63 | 3.96E-08 | HLA-DRB1                                            | intronic   |
| 6 | 32483454 | C | T | rs148072191           | 1.91E-05 | 0.200 | 0.261 | 0.71 | 0.58 | -0.87 | 1.22E-04 | 0.190 | 0.265 | 0.65 | 0.51 | -0.82 | 0.61 | 3.97E-08 | HLA-DRA(dist=70628), HLA-DRB5(dist=1700)            | intergenic |
| 6 | 32574703 | G | C | rs9271013             | 2.19E-04 | 0.308 | 0.241 | 0.72 | 0.6  | -0.86 | 7.49E-06 | 0.327 | 0.237 | 0.64 | 0.52 | -0.78 | 0.65 | 4.08E-08 | HLA-DRB1(dist=17090), HLA-DQA1(dist=30480)          | intergenic |
| 6 | 32574696 | A | C | rs9271012             | 2.19E-04 | 0.308 | 0.241 | 0.72 | 0.6  | -0.86 | 7.50E-06 | 0.327 | 0.237 | 0.64 | 0.52 | -0.78 | 0.65 | 4.09E-08 | HLA-DRB1(dist=17083), HLA-DQA1(dist=30487)          | intergenic |
| 6 | 32484625 | T | C | rs79394030            | 2.49E-07 | 0.308 | 0.511 | 0.72 | 0.61 | -0.84 | 4.18E-03 | 0.492 | 0.431 | 0.78 | 0.65 | -0.94 | 0.64 | 4.12E-08 | HLA-DRB5                                            | downstream |
| 6 | 32481336 | T | C | rs141331602           | 8.53E-07 | 0.311 | 0.236 | 0.68 | 0.57 | -0.82 | 1.95E-03 | 0.227 | 0.171 | 0.70 | 0.56 | -0.88 | 0.61 | 4.14E-08 | HLA-DRA(dist=68510), HLA-DRB5(dist=3818)            | intergenic |
| 6 | 32566686 | T | A | rs9270678             | 2.26E-04 | 0.289 | 0.225 | 0.71 | 0.59 | -0.86 | 7.56E-06 | 0.327 | 0.238 | 0.64 | 0.53 | -0.79 | 0.65 | 4.15E-08 | HLA-DRB1(dist=9073), HLA-DQA1(dist=38497)           | intergenic |
| 6 | 32485025 | C | T | rs114902457           | 4.62E-07 | 0.386 | 0.310 | 0.72 | 0.6  | -0.85 | 3.07E-03 | 0.302 | 0.250 | 0.77 | 0.63 | -0.95 | 0.61 | 4.15E-08 | HLA-DRB5                                            | downstream |
| 6 | 32565807 | A | C | rs9270648             | 2.16E-04 | 0.314 | 0.250 | 0.73 | 0.61 | -0.87 | 7.98E-06 | 0.332 | 0.243 | 0.65 | 0.53 | -0.79 | 0.65 | 4.15E-08 | HLA-DRB1(dist=8194), HLA-DQA1(dist=39376)           | intergenic |
| 6 | 32561277 | C | T | rs9270584             | 2.59E-04 | 0.297 | 0.233 | 0.72 | 0.6  | -0.86 | 6.11E-06 | 0.328 | 0.239 | 0.64 | 0.53 | -0.79 | 0.65 | 4.17E-08 | HLA-DRB1(dist=3664), HLA-DQA1(dist=43906)           | intergenic |
| 6 | 32567586 | A | C | rs9270719;rs386699447 | 2.43E-04 | 0.295 | 0.230 | 0.71 | 0.6  | -0.86 | 6.73E-06 | 0.328 | 0.238 | 0.64 | 0.52 | -0.78 | 0.65 | 4.22E-08 | HLA-DRB1(dist=9973), HLA-DQA1(dist=37597)           | intergenic |
| 6 | 32541282 | T | G | rs9269395             | 3.66E-04 | 0.389 | 0.327 | 0.76 | 0.65 | -0.9  | 4.19E-06 | 0.349 | 0.259 | 0.65 | 0.54 | -0.8  | 0.64 | 4.28E-08 | HLA-DRB6(dist=13503), HLA-DRB1(dist=5265)           | intergenic |
| 6 | 32576699 | G | A | rs9271111             | 1.87E-04 | 0.305 | 0.238 | 0.71 | 0.59 | -0.85 | 9.71E-06 | 0.325 | 0.237 | 0.64 | 0.53 | -0.79 | 0.65 | 4.32E-08 | HLA-DRB1(dist=19086), HLA-DQA1(dist=28484)          | intergenic |
| 6 | 32542728 | T | G | rs9269485             | 3.53E-04 | 0.322 | 0.265 | 0.76 | 0.64 | -0.9  | 5.14E-06 | 0.321 | 0.234 | 0.65 | 0.53 | -0.79 | 0.63 | 4.32E-08 | HLA-DRB6(dist=14949), HLA-DRB1(dist=3819)           | intergenic |
| 6 | 32546828 | C | T | rs1064697             | 2.13E-06 | 0.258 | 0.192 | 0.68 | 0.57 | -0.83 | 9.85E-04 | 0.211 | 0.156 | 0.69 | 0.55 | -0.87 | 0.59 | 4.33E-08 | HLA-DRB1(NM_002124;c.*40G>A, NM_001243965;c.*40G>A) | UTR3       |
| 6 | 32567154 | A | C | rs9270695;rs386699437 | 2.90E-04 | 0.307 | 0.244 | 0.73 | 0.61 | -0.87 | 5.94E-06 | 0.342 | 0.252 | 0.65 | 0.53 | -0.79 | 0.65 | 4.34E-08 | HLA-DRB1(dist=9541), HLA-DQA1(dist=38029)           | intergenic |
| 6 | 32579211 | G | C | rs9271213             | 1.84E-04 | 0.300 | 0.232 | 0.71 | 0.59 | -0.85 | 9.91E-06 | 0.324 | 0.236 | 0.64 | 0.53 | -0.79 | 0.65 | 4.34E-08 | HLA-DRB1(dist=21598), HLA-DQA1(dist=25972)          | intergenic |
| 6 | 32560808 | G | A | rs9270568             | 2.68E-04 | 0.296 | 0.231 | 0.72 | 0.6  | -0.86 | 6.11E-06 | 0.328 | 0.239 | 0.64 | 0.53 | -0.79 | 0.65 | 4.34E-08 | HLA-DRB1(dist=3195), HLA-DQA1(dist=44375)           | intergenic |
| 6 | 32561302 | G | A | rs9270586             | 2.61E-04 | 0.298 | 0.233 | 0.72 | 0.6  | -0.86 | 6.40E-06 | 0.328 | 0.239 | 0.64 | 0.53 | -0.79 | 0.65 | 4.35E-08 | HLA-DRB1(dist=3689), HLA-DQA1(dist=43881)           | intergenic |
| 6 | 32503039 | A | G | rs71549270            | 6.36E-07 | 0.272 | 0.202 | 0.67 | 0.56 | -0.81 | 2.25E-03 | 0.214 | 0.160 | 0.70 | 0.56 | -0.88 | 0.60 | 4.36E-08 | HLA-DRB5(dist=5033), HLA-DRB6(dist=17451)           | intergenic |
| 6 | 32574807 | C | T | rs9271018             | 2.27E-04 | 0.326 | 0.261 | 0.73 | 0.61 | -0.87 | 8.16E-06 | 0.328 | 0.238 | 0.64 | 0.53 | -0.78 | 0.65 | 4.36E-08 | HLA-DRB1(dist=17194), HLA-DQA1(dist=30376)          | intergenic |
| 6 | 32561305 | T | G | rs9270587             | 2.63E-04 | 0.298 | 0.233 | 0.72 | 0.6  | -0.86 | 6.39E-06 | 0.328 | 0.240 | 0.64 | 0.53 | -0.79 | 0.65 | 4.38E-08 | HLA-DRB1(dist=3692), HLA-DQA1(dist=43878)           | intergenic |
| 6 | 32560899 | C | T | rs9270569             | 2.70E-04 | 0.296 | 0.232 | 0.72 | 0.6  | -0.86 | 6.12E-06 | 0.328 | 0.239 | 0.64 | 0.53 | -0.79 | 0.65 | 4.38E-08 | HLA-DRB1(dist=3286), HLA-DQA1(dist=44284)           | intergenic |
| 6 | 32571771 | G | A | rs9270885             | 1.85E-04 | 0.313 | 0.246 | 0.72 | 0.6  | -0.86 | 9.86E-06 | 0.324 | 0.237 | 0.65 | 0.53 | -0.79 | 0.65 | 4.39E-08 | HLA-DRB1(dist=14158), HLA-DQA1(dist=33412)          | intergenic |
| 6 | 32487928 | T | G | rs113970288           | 4.06E-05 | 0.341 | 0.401 | 0.77 | 0.65 | -0.92 | 6.50E-05 | 0.359 | 0.440 | 0.71 | 0.59 | -0.86 | 0.62 | 4.40E-08 | HLA-DRB5                                            | intronic   |
| 6 | 32583543 | A | G | rs9271347             | 9.04E-07 | 0.210 | 0.138 | 0.60 | 0.49 | -0.74 | 1.95E-03 | 0.194 | 0.142 | 0.69 | 0.54 | -0.87 | 0.60 | 4.41E-08 | HLA-DRB1(dist=25930), HLA-DQA1(dist=21640)          | intergenic |
| 6 | 32538590 | T | C | rs11655598            | 1.76E-04 | 0.302 | 0.246 | 0.74 | 0.62 | -0.89 | 1.36E-05 | 0.329 | 0.247 | 0.67 | 0.55 | -0.82 | 0.63 | 4.41E-08 | HLA-DRB6(dist=10811), HLA-DRB1(dist=7957)           | intergenic |
| 6 | 32567007 | A | G | rs66835153;rs9270693  | 2.80E-04 | 0.306 | 0.243 | 0.73 | 0.61 | -0.87 | 6.36E-06 | 0.341 | 0.252 | 0.65 | 0.53 | -0.79 | 0.65 | 4.42E-08 | HLA-DRB1(dist=9394), HLA-DQA1(dist=38176)           | intergenic |
| 6 | 32567006 | C | T | rs9270692;rs66835153  | 2.83E-04 | 0.306 | 0.243 | 0.73 | 0.61 | -0.87 | 6.34E-06 | 0.341 | 0.252 | 0.65 | 0.53 | -0.79 | 0.65 | 4.45E-08 | HLA-DRB1(dist=9393), HLA-DQA1(dist=38177)           | intergenic |
| 6 | 32494826 | G | C | rs143514699           | 4.62E-06 | 0.240 | 0.309 | 0.71 | 0.59 | -0.85 | 5.23E-04 | 0.285 | 0.355 | 0.73 | 0.59 | -0.89 | 0.62 | 4.45E-08 | HLA-DRB5                                            | intronic   |
| 6 | 32585755 | T | A | rs3129762             | 1.08E-06 | 0.210 | 0.138 | 0.61 | 0.49 | -0.74 | 1.74E-03 | 0.195 | 0.143 | 0.69 | 0.54 | -0.87 | 0.60 | 4.46E-08 | HLA-DRB1(dist=28142), HLA-DQA1(dist=19428)          | intergenic |
| 6 | 32567337 | C | T | rs9270705             | 3.58E-04 | 0.364 | 0.302 | 0.75 | 0.64 | -0.89 | 4.45E-06 | 0.363 | 0.271 | 0.65 | 0.53 | -0.79 | 0.65 | 4.46E-08 | HLA-DRB1(dist=9724), HLA-DQA1(dist=37846)           | intergenic |
| 6 | 32569233 | A | G | rs9270792             | 1.35E-04 | 0.430 | 0.366 | 0.76 | 0.65 | -0.9  | 1.79E-05 | 0.411 | 0.326 | 0.69 | 0.57 | -0.84 | 0.64 | 4.53E-08 | HLA-DRB1(dist=11620), HLA-DQA1(dist=35950)          | intergenic |
| 6 | 32566744 | C | T | rs9270680             | 2.24E-04 | 0.307 | 0.244 | 0.73 | 0.61 | -0.87 | 9.06E-06 | 0.334 | 0.246 | 0.65 | 0.53 | -0.79 | 0.65 | 4.62E-08 | HLA-DRB1(dist=9131), HLA-DQA1(dist=38439)           | intergenic |
| 6 | 32572079 | T | C | rs9270906             | 2.18E-04 | 0.306 | 0.240 | 0.71 | 0.6  | -0.86 | 8.89E-06 | 0.340 | 0.249 | 0.64 | 0.53 | -0.79 | 0.66 | 4.67E-08 | HLA-DRB1(dist=14466), HLA-DQA1(dist=43104)          | intergenic |
| 6 | 32567024 | C | T | rs9270694             | 2.53E-04 | 0.288 | 0.224 | 0.71 | 0.59 | -0.86 | 7.73E-06 | 0.327 | 0.238 | 0.64 | 0.53 | -0.79 | 0.65 | 4.74E-08 | HLA-DRB1(dist=9411), HLA-DQA1(dist=38159)           | intergenic |
| 6 | 32584609 | A | C | rs3129757             | 1.05E-06 | 0.209 | 0.138 | 0.60 | 0.49 | -0.74 | 1.87E-03 | 0.194 | 0.142 | 0.69 | 0.54 | -0.87 | 0.60 | 4.74E-08 | HLA-DRB1(dist=26996), HLA-DQA1(dist=20574)          | intergenic |
| 6 | 32568654 | A | G | rs9271366             | 1.21E-06 | 0.210 | 0.139 | 0.61 | 0.49 | -0.75 | 1.70E-03 | 0.195 | 0.142 | 0.68 | 0.54 | -0.87 | 0.60 | 4.75E-08 | HLA-DRB1(dist=29241), HLA-DQA1(dist=18329)          | intergenic |
| 6 | 32566909 | A | T | rs9270689             | 2.61E-04 | 0.289 | 0.225 | 0.71 | 0.59 | -0.86 | 7.59E-06 | 0.327 | 0.238 | 0.64 | 0.53 | -0.79 | 0.65 | 4.81E-08 | HLA-DRB1(dist=9296), HLA-DQA1(dist=38274)           | intergenic |
| 6 | 32566948 | G | A | rs9270690             | 2.62E-04 | 0.289 | 0.225 | 0.71 | 0.59 | -0.86 | 7.60E-06 | 0.327 | 0.238 | 0.64 | 0.53 | -0.79 | 0.65 | 4.83E-08 | HLA-DRB1(dist=9335), HLA-DQA1(dist=38235)           | intergenic |
| 6 | 32586019 | A | G | rs3135005             | 1.01E-06 | 0.209 | 0.138 | 0.60 | 0.49 | -0.74 | 1.97E-03 | 0.194 | 0.142 | 0.69 | 0.54 | -0.87 | 0.60 | 4.84E-08 | HLA-DRB1(dist=28406), HLA-DQA1(dist=19164)          | intergenic |
| 6 | 32614228 | A | G | rs9273255             | 3.82E-05 | 0.250 | 0.319 | 0.71 | 0.59 | -0.86 | 7.69E-05 | 0.310 | 0.402 | 0.67 | 0.55 | -0.82 | 0.66 | 4.85E-08 | HLA-DQA1(dist=2799), HLA-DQB1(dist=13013)           | intergenic |
| 6 | 32569157 | C | T | rs9270784             | 3.12E-04 | 0.357 | 0.297 | 0.76 | 0.64 | -0.9  | 6.33E-06 | 0.364 | 0.277 | 0.67 | 0.55 | -0.81 | 0.64 | 4.87E-08 | HLA-DRB1(dist=11544), HLA-DQA1(dist=36026)          | intergenic |
| 6 | 32584066 | C | T | rs9271354             | 1.06E-06 | 0.209 | 0.138 | 0.60 | 0.49 | -0.74 | 1.92E-03 | 0.194 | 0.142 | 0.69 | 0.54 | -0.87 | 0.60 | 4.91E-08 | HLA-DRB1(dist=26453), HLA-DQA1(dist=21117)          | intergenic |
| 6 | 32559764 | T | C | rs9270539             | 2.81E-04 | 0.303 | 0.240 | 0.72 | 0.61 | -0.87 | 6.94E-06 | 0.331 | 0.243 | 0.65 | 0.53 | -0.79 | 0.65 | 4.91E-08 | HLA-DRB1(dist=2151), HLA-DQA1(dist=45419)           | intergenic |
| 6 | 32583860 | C | G | rs9271351             | 1.06E-06 | 0.209 | 0.138 | 0.60 | 0.49 | -0.74 | 1.95E-03 | 0.194 | 0.142 | 0.69 | 0.54 | -0.87 | 0.60 | 5.03E-08 | HLA-DRB1(dist=26247), HLA-DQA1(dist=21323)          | intergenic |
| 6 | 32565626 | A | G | rs386699423;rs9270635 | 1.14E-04 | 0.385 | 0.318 | 0.75 | 0.63 | -0.88 | 2.31E-05 | 0.346 | 0.262 | 0.67 | 0.55 | -0.82 | 0.65 | 5.07E-08 | HLA-DRB1(dist=8013), HLA-DQA1(dist=39557)           | intergenic |
| 6 | 32571845 | C | T | rs9270893             | 1.73E-04 | 0.308 | 0.243 | 0.72 | 0.6  | -0.86 | 1.32E-05 | 0.313 | 0.230 | 0.65 | 0.53 | -0.8  | 0.65 | 5.13E-08 | HLA-DRB1(dist=14232), HLA-DQA1(dist=33338)          | intergenic |
| 6 | 32568770 | T | C | rs9270767             | 3.88E-04 | 0.345 | 0.282 | 0.75 | 0.63 | -0.89 | 4.61E-06 | 0.340 | 0.250 | 0.65 | 0.53 | -0.79 | 0.65 | 5.13E-08 | HLA-DRB1(dist=11157), HLA-DQA1(dist=36413)          | intergenic |
| 6 | 32578040 | C | G | rs9271174             | 2.61E-04 | 0.295 | 0.229 | 0.71 | 0.59 | -0.85 | 7.58E-06 | 0.327 | 0.238 | 0.64 | 0.53 | -0.78 | 0.66 | 5.16E-08 | HLA-DRB1(dist=20427), HLA-DQA1(dist=27143)          | intergenic |
| 6 | 32577981 | A | G | rs9271173             | 2.64E-04 | 0.295 | 0.229 | 0.71 | 0.59 | -0.85 | 7.61E-06 | 0.327 | 0.238 | 0.64 | 0.53 | -0.78 | 0.66 | 5.23E-08 | HLA-DRB1(dist=20368), HLA-DQA1(dist=27202)          | intergenic |
| 6 | 32577975 | C | T | rs9271172             | 2.64E-04 | 0.295 | 0.229 | 0.71 | 0.59 | -0.85 | 7.62E-06 | 0.327 | 0.238 | 0.64 | 0.53 | -0.78 | 0.66 | 5.24E-08 |                                                     |            |

|   |          |   |   |                                   |          |       |       |      |      |       |          |       |       |      |      |       |      |          |                                                       |                |
|---|----------|---|---|-----------------------------------|----------|-------|-------|------|------|-------|----------|-------|-------|------|------|-------|------|----------|-------------------------------------------------------|----------------|
| 6 | 32580723 | G | T | rs3997873                         | 1.10E-06 | 0.209 | 0.138 | 0.61 | 0.49 | -0.74 | 2.09E-03 | 0.194 | 0.142 | 0.69 | 0.54 | -0.87 | 0.60 | 5.53E-08 | HLA-DRB1(dist=23110), HLA-DQA1(dist=24460)            | intergenic     |
| 6 | 32459491 | T | A | rs75948352                        | 1.37E-05 | 0.193 | 0.258 | 0.69 | 0.56 | -0.84 | 2.51E-04 | 0.204 | 0.271 | 0.69 | 0.55 | -0.87 | 0.62 | 5.59E-08 | HLA-DRA(dist=46665), HLA-DRB5(dist=25663)             | intergenic     |
| 6 | 32569608 | G | A | rs9270809                         | 2.54E-04 | 0.310 | 0.245 | 0.72 | 0.6  | -0.86 | 9.08E-06 | 0.332 | 0.324 | 0.65 | 0.53 | -0.79 | 0.65 | 5.60E-08 | HLA-DRB1(dist=11995), HLA-DQA1(dist=35575)            | intergenic     |
| 6 | 32524007 | A | G | rs148763535                       | 3.56E-06 | 0.244 | 0.316 | 0.70 | 0.58 | -0.84 | 8.85E-04 | 0.247 | 0.212 | 0.72 | 0.58 | -0.9  | 0.62 | 5.60E-08 | HLA-DRB6                                              | ncRNA_intronic |
| 6 | 32484442 | T | G | rs112574538                       | 1.25E-06 | 0.349 | 0.424 | 0.73 | 0.61 | -0.86 | 1.94E-03 | 0.421 | 0.483 | 0.78 | 0.64 | -0.94 | 0.63 | 5.62E-08 | HLA-DRB5                                              | downstream     |
| 6 | 32484499 | C | A | rs76397572                        | 5.87E-06 | 0.415 | 0.489 | 0.74 | 0.63 | -0.87 | 5.59E-04 | 0.424 | 0.492 | 0.76 | 0.63 | -0.92 | 0.63 | 5.64E-08 | HLA-DRB5                                              | downstream     |
| 6 | 32568763 | G | A | rs9270766                         | 4.34E-04 | 0.342 | 0.280 | 0.75 | 0.63 | -0.89 | 4.43E-06 | 0.340 | 0.250 | 0.65 | 0.53 | -0.79 | 0.65 | 5.64E-08 | HLA-DRB1(dist=11150), HLA-DQA1(dist=36420)            | intergenic     |
| 6 | 32510777 | C | T | rs376873017;rs112894757           | 1.40E-04 | 0.154 | 0.208 | 0.69 | 0.56 | -0.87 | 1.87E-05 | 0.135 | 0.210 | 0.59 | 0.45 | -0.77 | 0.60 | 5.65E-08 | HLA-DRB5(dist=12771), HLA-DRB6(dist=9713)             | intergenic     |
| 6 | 32576177 | T | G | rs9271089                         | 2.43E-04 | 0.302 | 0.236 | 0.71 | 0.6  | -0.85 | 9.60E-06 | 0.324 | 0.236 | 0.64 | 0.53 | -0.79 | 0.66 | 5.68E-08 | HLA-DRB1(dist=18564), HLA-DQA1(dist=29006)            | intergenic     |
| 6 | 32544772 | G | A | rs9269579                         | 2.94E-04 | 0.325 | 0.268 | 0.76 | 0.64 | -0.91 | 9.88E-06 | 0.346 | 0.262 | 0.67 | 0.55 | -0.82 | 0.63 | 5.73E-08 | HLA-DRB6(dist=16993), HLA-DRB1(dist=1775)             | intergenic     |
| 6 | 32566308 | A | C | rs386699431;rs386699432;rs9270668 | 3.22E-04 | 0.294 | 0.230 | 0.72 | 0.6  | -0.86 | 6.84E-06 | 0.328 | 0.239 | 0.64 | 0.52 | -0.78 | 0.65 | 5.76E-08 | HLA-DRB1(dist=8695), HLA-DQA1(dist=38875)             | intergenic     |
| 6 | 32572202 | C | T | rs9270911                         | 1.19E-04 | 0.556 | 0.475 | 0.72 | 0.61 | -0.85 | 2.26E-05 | 0.579 | 0.480 | 0.67 | 0.56 | -0.81 | 0.70 | 5.77E-08 | HLA-DRB1(dist=14589), HLA-DQA1(dist=32981)            | intergenic     |
| 6 | 32541898 | C | G | rs9269439                         | 1.89E-04 | 0.314 | 0.256 | 0.75 | 0.63 | -0.9  | 1.73E-05 | 0.315 | 0.234 | 0.66 | 0.54 | -0.81 | 0.62 | 5.90E-08 | HLA-DRB6(dist=14119), HLA-DRB1(dist=4649)             | intergenic     |
| 6 | 32545218 | C | T | rs9269610                         | 8.37E-05 | 0.342 | 0.276 | 0.73 | 0.62 | -0.87 | 3.93E-05 | 0.305 | 0.232 | 0.69 | 0.56 | -0.84 | 0.63 | 5.93E-08 | HLA-DRB6(dist=17439), HLA-DRB1(dist=1329)             | intergenic     |
| 6 | 32565854 | C | T | rs9270650                         | 3.21E-04 | 0.294 | 0.230 | 0.72 | 0.6  | -0.86 | 7.15E-06 | 0.328 | 0.238 | 0.64 | 0.53 | -0.78 | 0.65 | 5.93E-08 | HLA-DRB1(dist=8241), HLA-DQA1(dist=39329)             | intergenic     |
| 6 | 32569012 | G | C | rs9270774                         | 4.20E-04 | 0.325 | 0.262 | 0.74 | 0.62 | -0.88 | 4.78E-06 | 0.331 | 0.244 | 0.65 | 0.53 | -0.79 | 0.65 | 5.98E-08 | HLA-DRB1(dist=11399), HLA-DQA1(dist=36171)            | intergenic     |
| 6 | 32566598 | C | A | rs9270674                         | 3.29E-04 | 0.294 | 0.230 | 0.72 | 0.6  | -0.86 | 7.03E-06 | 0.328 | 0.238 | 0.64 | 0.53 | -0.78 | 0.65 | 6.01E-08 | HLA-DRB1(dist=8985), HLA-DQA1(dist=38585)             | intergenic     |
| 6 | 32565243 | A | G | rs9270619                         | 3.31E-04 | 0.293 | 0.230 | 0.72 | 0.6  | -0.86 | 7.09E-06 | 0.327 | 0.238 | 0.64 | 0.53 | -0.78 | 0.65 | 6.04E-08 | HLA-DRB1(dist=7630), HLA-DQA1(dist=39940)             | intergenic     |
| 6 | 32560327 | C | T | rs28366284                        | 3.86E-04 | 0.320 | 0.258 | 0.74 | 0.62 | -0.88 | 5.84E-06 | 0.331 | 0.242 | 0.64 | 0.53 | -0.79 | 0.65 | 6.08E-08 | HLA-DRB1(dist=2714), HLA-DQA1(dist=44856)             | intergenic     |
| 6 | 32569038 | T | A | rs9270777                         | 5.07E-04 | 0.338 | 0.276 | 0.75 | 0.63 | -0.89 | 3.61E-06 | 0.333 | 0.243 | 0.64 | 0.53 | -0.79 | 0.65 | 6.09E-08 | HLA-DRB1(dist=11425), HLA-DQA1(dist=36145)            | intergenic     |
| 6 | 32564861 | A | G | rs9270605                         | 3.40E-04 | 0.294 | 0.230 | 0.72 | 0.6  | -0.86 | 6.77E-06 | 0.326 | 0.237 | 0.64 | 0.53 | -0.79 | 0.65 | 6.11E-08 | HLA-DRB1(dist=7248), HLA-DQA1(dist=40322)             | intergenic     |
| 6 | 32569556 | T | A | rs9270805                         | 2.86E-04 | 0.296 | 0.230 | 0.71 | 0.59 | -0.85 | 8.53E-06 | 0.326 | 0.237 | 0.64 | 0.53 | -0.79 | 0.66 | 6.15E-08 | HLA-DRB1(dist=11943), HLA-DQA1(dist=35627)            | intergenic     |
| 6 | 32569263 | C | T | rs9270795                         | 2.68E-04 | 0.416 | 0.354 | 0.77 | 0.65 | -0.91 | 1.11E-05 | 0.403 | 0.315 | 0.68 | 0.56 | -0.82 | 0.65 | 6.16E-08 | HLA-DRB1(dist=11650), HLA-DQA1(dist=35920)            | intergenic     |
| 6 | 32546603 | A | G | rs1060270                         | 2.39E-06 | 0.245 | 0.179 | 0.67 | 0.55 | -0.82 | 1.24E-03 | 0.206 | 0.153 | 0.69 | 0.55 | -0.88 | 0.59 | 6.20E-08 | HLA-DRB1(NM_002124:c."265T>C, NM_001243965:c."265T>C) | UTR3           |
| 6 | 32565329 | C | T | rs9270622                         | 3.42E-04 | 0.294 | 0.230 | 0.72 | 0.6  | -0.86 | 6.97E-06 | 0.328 | 0.238 | 0.64 | 0.53 | -0.78 | 0.65 | 6.21E-08 | HLA-DRB1(dist=7716), HLA-DRB1(dist=29354)             | intergenic     |
| 6 | 32484673 | G | T | rs370404320;rs78391020            | 4.40E-05 | 0.346 | 0.411 | 0.76 | 0.64 | -0.9  | 8.70E-05 | 0.364 | 0.444 | 0.72 | 0.59 | -0.87 | 0.64 | 6.21E-08 | HLA-DRB5                                              | downstream     |
| 6 | 32567296 | G | C | rs9270697;rs386699438;rs386699439 | 2.66E-04 | 0.543 | 0.469 | 0.74 | 0.63 | -0.88 | 9.06E-06 | 0.562 | 0.459 | 0.66 | 0.55 | -0.8  | 0.69 | 6.24E-08 | HLA-DRB1(dist=9683), HLA-DQA1(dist=37887)             | intergenic     |
| 6 | 32459266 | T | C | rs113712440                       | 1.84E-06 | 0.293 | 0.364 | 0.73 | 0.61 | -0.87 | 1.52E-03 | 0.340 | 0.407 | 0.75 | 0.62 | -0.91 | 0.63 | 6.25E-08 | HLA-DRA(dist=46440), HLA-DRB5(dist=25888)             | intergenic     |
| 6 | 32550695 | C | T | rs28724021                        | 1.88E-05 | 0.110 | 0.164 | 0.63 | 0.49 | -0.81 | 2.07E-04 | 0.117 | 0.182 | 0.60 | 0.45 | -0.8  | 0.58 | 6.29E-08 | HLA-DRB1                                              | intronic       |
| 6 | 32568346 | G | A | rs9270750                         | 2.44E-04 | 0.413 | 0.347 | 0.76 | 0.64 | -0.89 | 1.18E-05 | 0.383 | 0.295 | 0.67 | 0.56 | -0.82 | 0.65 | 6.30E-08 | HLA-DRB1(dist=10733), HLA-DQA1(dist=36837)            | intergenic     |
| 6 | 32546986 | G | C | rs9269698                         | 1.72E-06 | 0.254 | 0.187 | 0.67 | 0.56 | -0.82 | 1.65E-03 | 0.210 | 0.159 | 0.71 | 0.56 | -0.89 | 0.59 | 6.35E-08 | HLA-DRB1                                              | intronic       |
| 6 | 32576175 | A | C | rs9271088                         | 2.84E-04 | 0.305 | 0.240 | 0.72 | 0.6  | -0.86 | 9.04E-06 | 0.324 | 0.236 | 0.64 | 0.53 | -0.79 | 0.66 | 6.37E-08 | HLA-DRB1(dist=18562), HLA-DQA1(dist=29008)            | intergenic     |
| 6 | 32537722 | A | C | rs19003297                        | 1.10E-05 | 0.303 | 0.238 | 0.72 | 0.6  | -0.86 | 3.47E-04 | 0.248 | 0.184 | 0.68 | 0.55 | -0.85 | 0.60 | 6.38E-08 | HLA-DRB6(dist=9943), HLA-DRB1(dist=8825)              | intergenic     |
| 6 | 32567330 | T | C | rs386699441;rs9270704             | 4.13E-04 | 0.363 | 0.301 | 0.76 | 0.64 | -0.9  | 5.91E-06 | 0.360 | 0.269 | 0.65 | 0.54 | -0.79 | 0.65 | 6.40E-08 | HLA-DRB1(dist=9717), HLA-DQA1(dist=37853)             | intergenic     |
| 6 | 32560645 | A | G | rs9270557                         | 4.02E-04 | 0.299 | 0.236 | 0.73 | 0.61 | -0.87 | 5.77E-06 | 0.328 | 0.239 | 0.64 | 0.53 | -0.79 | 0.65 | 6.40E-08 | HLA-DRB1(dist=3032), HLA-DQA1(dist=44538)             | intergenic     |
| 6 | 32574808 | G | A | rs9271019                         | 3.26E-04 | 0.322 | 0.259 | 0.74 | 0.62 | -0.88 | 8.24E-06 | 0.327 | 0.238 | 0.64 | 0.53 | -0.78 | 0.65 | 6.42E-08 | HLA-DRB1(dist=17195), HLA-DQA1(dist=30375)            | intergenic     |
| 6 | 32567368 | C | G | rs9270710                         | 3.45E-04 | 0.364 | 0.301 | 0.75 | 0.63 | -0.89 | 7.18E-06 | 0.342 | 0.253 | 0.65 | 0.53 | -0.79 | 0.65 | 6.44E-08 | HLA-DRB1(dist=9755), HLA-DQA1(dist=37815)             | intergenic     |
| 6 | 32548321 | C | T | rs9269762                         | 1.71E-06 | 0.239 | 0.175 | 0.67 | 0.55 | -0.82 | 1.62E-03 | 0.203 | 0.152 | 0.71 | 0.56 | -0.89 | 0.58 | 6.46E-08 | HLA-DRB1                                              | intronic       |
| 6 | 32589842 | G | A | rs9271525                         | 3.88E-06 | 0.227 | 0.157 | 0.63 | 0.52 | -0.77 | 9.09E-04 | 0.217 | 0.158 | 0.68 | 0.54 | -0.85 | 0.62 | 6.49E-08 | HLA-DRB1(dist=32229), HLA-DQA1(dist=15341)            | intergenic     |
| 6 | 32455827 | A | G | rs75044322                        | 1.37E-06 | 0.374 | 0.449 | 0.73 | 0.62 | -0.87 | 1.97E-03 | 0.555 | 0.489 | 0.77 | 0.64 | -0.93 | 0.64 | 6.55E-08 | HLA-DRA(dist=43001), HLA-DRB5(dist=29327)             | intergenic     |
| 6 | 32509333 | C | T | rs72492305                        | 9.04E-04 | 0.414 | 0.357 | 0.79 | 0.67 | -0.93 | 2.21E-06 | 0.431 | 0.336 | 0.67 | 0.55 | -0.81 | 0.65 | 6.61E-08 | HLA-DRB5(dist=11327), HLA-DRB6(dist=11157)            | intergenic     |
| 6 | 32568097 | G | A | rs9270736                         | 1.75E-04 | 0.378 | 0.313 | 0.75 | 0.63 | -0.89 | 1.84E-05 | 0.337 | 0.252 | 0.66 | 0.54 | -0.81 | 0.66 | 6.65E-08 | HLA-DRB1(dist=10484), HLA-DQA1(dist=37086)            | intergenic     |
| 6 | 32576165 | T | A | rs9271086                         | 2.85E-04 | 0.305 | 0.240 | 0.72 | 0.6  | -0.86 | 9.64E-06 | 0.325 | 0.237 | 0.64 | 0.53 | -0.79 | 0.66 | 6.66E-08 | HLA-DRB1(dist=18552), HLA-DQA1(dist=29018)            | intergenic     |
| 6 | 32566149 | G | A | rs9270664                         | 1.10E-04 | 0.515 | 0.434 | 0.72 | 0.61 | -0.85 | 3.01E-05 | 0.536 | 0.437 | 0.67 | 0.56 | -0.81 | 0.70 | 6.70E-08 | HLA-DRB1(dist=8536), HLA-DQA1(dist=39034)             | intergenic     |
| 6 | 32569607 | G | C | rs9270808                         | 2.51E-04 | 0.310 | 0.245 | 0.72 | 0.6  | -0.86 | 1.22E-05 | 0.329 | 0.242 | 0.65 | 0.53 | -0.79 | 0.66 | 6.93E-08 | HLA-DRB1(dist=11994), HLA-DQA1(dist=35576)            | intergenic     |
| 6 | 32574130 | A | G | rs386699452;rs9270988;rs386699453 | 4.86E-04 | 0.294 | 0.231 | 0.72 | 0.6  | -0.86 | 4.74E-06 | 0.336 | 0.244 | 0.64 | 0.52 | -0.78 | 0.66 | 6.94E-08 | HLA-DRB1(dist=16517), HLA-DQA1(dist=31053)            | intergenic     |
| 6 | 32574881 | A | G | rs9271022                         | 3.35E-04 | 0.321 | 0.258 | 0.73 | 0.61 | -0.87 | 8.68E-06 | 0.327 | 0.239 | 0.64 | 0.53 | -0.79 | 0.66 | 7.02E-08 | HLA-DRB1(dist=17268), HLA-DQA1(dist=30302)            | intergenic     |
| 6 | 32568740 | G | T | rs9270765                         | 5.80E-04 | 0.309 | 0.248 | 0.74 | 0.62 | -0.89 | 3.89E-06 | 0.328 | 0.239 | 0.64 | 0.53 | -0.79 | 0.65 | 7.06E-08 | HLA-DRB1(dist=11127), HLA-DQA1(dist=36443)            | intergenic     |
| 6 | 32588606 | C | G | rs9271466                         | 3.51E-06 | 0.229 | 0.159 | 0.63 | 0.52 | -0.77 | 1.08E-03 | 0.216 | 0.158 | 0.68 | 0.54 | -0.86 | 0.62 | 7.13E-08 | HLA-DRB1(dist=30993), HLA-DQA1(dist=16577)            | intergenic     |
| 6 | 32646113 | G | A | rs146422992                       | 2.61E-07 | 0.155 | 0.105 | 1.56 | 1.24 | -1.97 | 5.85E-03 | 0.136 | 0.095 | 1.50 | 1.14 | -1.97 | 1.95 | 7.13E-08 | HLA-DQB1(dist=11647), HLA-DQA2(dist=63050)            | intergenic     |
| 6 | 32561143 | C | T | rs386699414;rs9270581             | 3.85E-04 | 0.296 | 0.233 | 0.73 | 0.61 | -0.87 | 7.13E-06 | 0.326 | 0.238 | 0.65 | 0.53 | -0.79 | 0.65 | 7.16E-08 | HLA-DRB1(dist=3530), HLA-DQA1(dist=44040)             | intergenic     |
| 6 | 32573748 | A | G | rs9270977                         | 3.57E-04 | 0.296 | 0.232 | 0.72 | 0.6  | -0.86 | 8.17E-06 | 0.334 | 0.243 | 0.64 | 0.52 | -0.78 | 0.66 | 7.25E-08 | HLA-DRB1(dist=16135), HLA-DQA1(dist=31435)            | intergenic     |
| 6 | 32570809 | A | G | rs9270854                         | 3.07E-04 | 0.294 | 0.229 | 0.71 | 0.59 | -0.85 | 9.74E-06 | 0.325 | 0.237 | 0.64 | 0.53 | -0.79 | 0.66 | 7.32E-08 | HLA-DRB1(dist=13196), HLA-DQA1(dist=34374)            | intergenic     |
| 6 | 32498958 | G | C | rs11553783;rs115724954            | 6.44E-06 | 0.444 | 0.377 | 0.76 | 0.64 | -0.89 | 6.91E-04 | 0.342 | 0.282 | 0.75 | 0.62 | -0.92 | 0.61 | 7.33E-08 | HLA-DRB5                                              | upstream       |
| 6 | 32572290 | G | A | rs9270915;rs199779851;rs386699450 | 2.93E-04 | 0.300 | 0.235 | 0.72 | 0.6  | -0.86 |          |       |       |      |      |       |      |          |                                                       |                |

|   |          |   |   |                         |          |       |       |      |      |       |          |       |       |      |      |       |      |          |                                            |            |
|---|----------|---|---|-------------------------|----------|-------|-------|------|------|-------|----------|-------|-------|------|------|-------|------|----------|--------------------------------------------|------------|
| 6 | 32571011 | G | C | rs9270865               | 3.45E-04 | 0.295 | 0.231 | 0.72 | 0.6  | -0.86 | 9.16E-06 | 0.325 | 0.237 | 0.64 | 0.53 | -0.79 | 0.66 | 7.89E-08 | HLA-DRB1(dist=13398), HLA-DQA1(dist=34172) | intergenic |
| 6 | 32571001 | T | C | rs9270864               | 3.45E-04 | 0.295 | 0.231 | 0.72 | 0.6  | -0.86 | 9.16E-06 | 0.325 | 0.237 | 0.64 | 0.53 | -0.79 | 0.66 | 7.90E-08 | HLA-DRB1(dist=13388), HLA-DQA1(dist=34182) | intergenic |
| 6 | 32578818 | C | A | rs9271201               | 4.03E-04 | 0.292 | 0.228 | 0.72 | 0.6  | -0.86 | 7.29E-06 | 0.326 | 0.237 | 0.64 | 0.53 | -0.79 | 0.66 | 7.94E-08 | HLA-DRB1(dist=21205), HLA-DQA1(dist=26365) | intergenic |
| 6 | 32569659 | T | C | rs9270810               | 3.64E-04 | 0.292 | 0.228 | 0.71 | 0.6  | -0.86 | 8.54E-06 | 0.324 | 0.235 | 0.64 | 0.53 | -0.79 | 0.66 | 7.99E-08 | HLA-DRB1(dist=12046), HLA-DQA1(dist=35524) | intergenic |
| 6 | 32486115 | A | T | rs138467328             | 3.38E-06 | 0.338 | 0.267 | 0.71 | 0.6  | -0.85 | 1.26E-03 | 0.264 | 0.207 | 0.73 | 0.59 | -0.9  | 0.62 | 8.05E-08 | HLA-DRB5                                   | intronic   |
| 6 | 32576493 | C | T | rs9271101               | 3.52E-04 | 0.293 | 0.228 | 0.71 | 0.59 | -0.86 | 9.01E-06 | 0.324 | 0.236 | 0.64 | 0.53 | -0.79 | 0.66 | 8.07E-08 | HLA-DRB1(dist=18880), HLA-DQA1(dist=28690) | intergenic |
| 6 | 32572249 | A | T | rs9270914               | 3.29E-04 | 0.293 | 0.228 | 0.71 | 0.59 | -0.86 | 1.01E-05 | 0.325 | 0.237 | 0.64 | 0.53 | -0.79 | 0.66 | 8.07E-08 | HLA-DRB1(dist=14636), HLA-DQA1(dist=32934) | intergenic |
| 6 | 32568299 | A | G | rs9270748               | 2.79E-04 | 0.354 | 0.291 | 0.75 | 0.63 | -0.89 | 1.38E-05 | 0.339 | 0.253 | 0.66 | 0.54 | -0.8  | 0.65 | 8.07E-08 | HLA-DRB1(dist=10686), HLA-DQA1(dist=36884) | intergenic |
| 6 | 32577455 | A | G | rs9271149               | 3.74E-04 | 0.293 | 0.228 | 0.71 | 0.6  | -0.86 | 8.50E-06 | 0.325 | 0.237 | 0.64 | 0.53 | -0.79 | 0.66 | 8.14E-08 | HLA-DRB1(dist=19842), HLA-DQA1(dist=27728) | intergenic |
| 6 | 32587375 | G | A | rs9271382               | 3.02E-04 | 0.530 | 0.454 | 0.74 | 0.63 | -0.87 | 1.05E-05 | 0.550 | 0.445 | 0.66 | 0.54 | -0.79 | 0.70 | 8.16E-08 | HLA-DRB1(dist=29762), HLA-DQA1(dist=17808) | intergenic |
| 6 | 32480063 | G | A | rs78541059              | 5.65E-06 | 0.191 | 0.258 | 0.68 | 0.55 | -0.83 | 8.90E-04 | 0.166 | 0.230 | 0.67 | 0.52 | -0.85 | 0.62 | 8.19E-08 | HLA-DRA(dist=67237), HLA-DRB5(dist=5091)   | intergenic |
| 6 | 32510772 | G | A | rs376873017;rs113766057 | 1.90E-04 | 0.156 | 0.209 | 0.70 | 0.56 | -0.87 | 2.00E-05 | 0.135 | 0.209 | 0.59 | 0.45 | -0.77 | 0.60 | 8.21E-08 | HLA-DRB5(dist=12766), HLA-DRB6(dist=9718)  | intergenic |
| 6 | 32567798 | G | T | rs9270723               | 4.47E-04 | 0.294 | 0.231 | 0.72 | 0.6  | -0.87 | 6.89E-06 | 0.327 | 0.238 | 0.64 | 0.53 | -0.78 | 0.66 | 8.24E-08 | HLA-DRB1(dist=10185), HLA-DQA1(dist=37385) | intergenic |
| 6 | 32576540 | T | C | rs9271103               | 3.53E-04 | 0.293 | 0.228 | 0.71 | 0.59 | -0.86 | 9.39E-06 | 0.325 | 0.236 | 0.64 | 0.53 | -0.79 | 0.66 | 8.24E-08 | HLA-DRB1(dist=18927), HLA-DQA1(dist=28643) | intergenic |
| 6 | 32576296 | A | G | rs9271092               | 3.50E-04 | 0.293 | 0.228 | 0.71 | 0.59 | -0.86 | 9.46E-06 | 0.324 | 0.236 | 0.64 | 0.53 | -0.79 | 0.66 | 8.27E-08 | HLA-DRB1(dist=18683), HLA-DQA1(dist=28887) | intergenic |
| 6 | 32504061 | T | C | rs71549278              | 3.66E-06 | 0.364 | 0.441 | 0.73 | 0.61 | -0.86 | 1.19E-03 | 0.379 | 0.455 | 0.73 | 0.6  | -0.89 | 0.66 | 8.28E-08 | HLA-DRB5(dist=6055), HLA-DRB6(dist=16429)  | intergenic |
| 6 | 32572224 | A | G | rs9270912               | 3.37E-04 | 0.293 | 0.229 | 0.71 | 0.6  | -0.86 | 1.02E-05 | 0.325 | 0.237 | 0.64 | 0.53 | -0.79 | 0.66 | 8.36E-08 | HLA-DRB1(dist=14611), HLA-DQA1(dist=32959) | intergenic |
| 6 | 32538650 | T | G | rs72847631              | 1.43E-05 | 0.349 | 0.414 | 0.76 | 0.64 | -0.9  | 3.69E-04 | 0.304 | 0.380 | 0.71 | 0.58 | -0.87 | 0.63 | 8.37E-08 | HLA-DRB6(dist=10871), HLA-DRB1(dist=7897)  | intergenic |
| 6 | 32570550 | T | G | rs9270844               | 3.57E-04 | 0.294 | 0.229 | 0.71 | 0.6  | -0.86 | 9.45E-06 | 0.325 | 0.237 | 0.64 | 0.53 | -0.79 | 0.66 | 8.38E-08 | HLA-DRB1(dist=12937), HLA-DQA1(dist=34633) | intergenic |
| 6 | 32561161 | T | C | rs9270582               | 4.30E-04 | 0.305 | 0.243 | 0.73 | 0.61 | -0.87 | 7.57E-06 | 0.326 | 0.239 | 0.65 | 0.53 | -0.79 | 0.65 | 8.39E-08 | HLA-DRB1(dist=3548), HLA-DQA1(dist=44022)  | intergenic |
| 6 | 32572229 | A | G | rs9270913               | 3.39E-04 | 0.293 | 0.229 | 0.71 | 0.6  | -0.86 | 1.02E-05 | 0.325 | 0.237 | 0.64 | 0.53 | -0.79 | 0.66 | 8.41E-08 | HLA-DRB1(dist=14616), HLA-DQA1(dist=32954) | intergenic |
| 6 | 32551541 | T | C | rs9269919               | 3.47E-06 | 0.250 | 0.186 | 0.68 | 0.56 | -0.83 | 1.18E-03 | 0.214 | 0.158 | 0.69 | 0.55 | -0.86 | 0.60 | 8.41E-08 | HLA-DRB1                                   | intronic   |
| 6 | 32570571 | T | C | rs9270845               | 3.59E-04 | 0.294 | 0.229 | 0.71 | 0.6  | -0.86 | 9.63E-06 | 0.325 | 0.237 | 0.64 | 0.53 | -0.79 | 0.66 | 8.54E-08 | HLA-DRB1(dist=12958), HLA-DQA1(dist=34612) | intergenic |
| 6 | 32580241 | C | A | rs372076960;rs9271251   | 3.61E-04 | 0.293 | 0.228 | 0.71 | 0.6  | -0.86 | 9.59E-06 | 0.325 | 0.236 | 0.64 | 0.53 | -0.79 | 0.66 | 8.57E-08 | HLA-DRB1(dist=22628), HLA-DQA1(dist=24942) | intergenic |
| 6 | 32570649 | C | T | rs9270849               | 3.67E-04 | 0.294 | 0.229 | 0.72 | 0.6  | -0.86 | 9.40E-06 | 0.325 | 0.237 | 0.64 | 0.53 | -0.79 | 0.66 | 8.57E-08 | HLA-DRB1(dist=13036), HLA-DQA1(dist=34534) | intergenic |
| 6 | 32570353 | C | T | rs9270838               | 3.65E-04 | 0.304 | 0.241 | 0.72 | 0.6  | -0.87 | 9.57E-06 | 0.332 | 0.243 | 0.65 | 0.53 | -0.79 | 0.66 | 8.58E-08 | HLA-DRB1(dist=12740), HLA-DQA1(dist=34830) | intergenic |
| 6 | 32481289 | T | C | rs112756604             | 1.91E-07 | 0.353 | 0.275 | 0.70 | 0.58 | -0.83 | 8.95E-03 | 0.269 | 0.220 | 0.76 | 0.62 | -0.95 | 0.62 | 8.59E-08 | HLA-DRA(dist=68463), HLA-DRB5(dist=3865)   | intergenic |
| 6 | 32576426 | A | G | rs9271096               | 4.36E-04 | 0.294 | 0.230 | 0.72 | 0.6  | -0.86 | 7.34E-06 | 0.325 | 0.236 | 0.64 | 0.52 | -0.78 | 0.66 | 8.60E-08 | HLA-DRB1(dist=18813), HLA-DQA1(dist=28757) | intergenic |
| 6 | 32567820 | A | T | rs9270724               | 4.51E-04 | 0.293 | 0.230 | 0.72 | 0.6  | -0.87 | 7.25E-06 | 0.327 | 0.238 | 0.64 | 0.53 | -0.79 | 0.66 | 8.62E-08 | HLA-DRB1(dist=10207), HLA-DQA1(dist=37363) | intergenic |
| 6 | 32578726 | G | A | rs9271198               | 3.79E-04 | 0.292 | 0.228 | 0.71 | 0.6  | -0.86 | 8.91E-06 | 0.324 | 0.236 | 0.64 | 0.53 | -0.79 | 0.66 | 8.63E-08 | HLA-DRB1(dist=21113), HLA-DQA1(dist=34577) | intergenic |
| 6 | 32570377 | C | T | rs9270840               | 3.79E-04 | 0.292 | 0.228 | 0.71 | 0.6  | -0.86 | 9.02E-06 | 0.325 | 0.236 | 0.64 | 0.53 | -0.79 | 0.66 | 8.63E-08 | HLA-DRB1(dist=12764), HLA-DQA1(dist=34806) | intergenic |
| 6 | 32570375 | A | C | rs9270839               | 3.80E-04 | 0.292 | 0.228 | 0.71 | 0.6  | -0.86 | 9.02E-06 | 0.325 | 0.236 | 0.64 | 0.53 | -0.79 | 0.66 | 8.63E-08 | HLA-DRB1(dist=12762), HLA-DQA1(dist=34808) | intergenic |
| 6 | 32578673 | A | T | rs79267592              | 3.72E-04 | 0.292 | 0.228 | 0.71 | 0.6  | -0.86 | 9.33E-06 | 0.325 | 0.236 | 0.64 | 0.53 | -0.79 | 0.66 | 8.66E-08 | HLA-DRB1(dist=21060), HLA-DQA1(dist=26510) | intergenic |
| 6 | 32576561 | G | A | rs9271104               | 3.57E-04 | 0.293 | 0.228 | 0.71 | 0.6  | -0.86 | 8.85E-06 | 0.325 | 0.236 | 0.64 | 0.53 | -0.79 | 0.66 | 8.66E-08 | HLA-DRB1(dist=18948), HLA-DQA1(dist=28622) | intergenic |
| 6 | 32570051 | C | G | rs9270823               | 3.89E-04 | 0.293 | 0.229 | 0.72 | 0.6  | -0.86 | 8.91E-06 | 0.332 | 0.243 | 0.65 | 0.53 | -0.79 | 0.66 | 8.67E-08 | HLA-DRB1(dist=12438), HLA-DQA1(dist=35132) | intergenic |
| 6 | 32570055 | T | G | rs9270824               | 3.88E-04 | 0.294 | 0.229 | 0.72 | 0.6  | -0.86 | 8.94E-06 | 0.332 | 0.243 | 0.65 | 0.53 | -0.79 | 0.66 | 8.67E-08 | HLA-DRB1(dist=12442), HLA-DQA1(dist=35128) | intergenic |
| 6 | 32568018 | C | T | rs9270732               | 4.68E-04 | 0.295 | 0.232 | 0.72 | 0.6  | -0.87 | 6.97E-06 | 0.327 | 0.238 | 0.64 | 0.53 | -0.78 | 0.66 | 8.68E-08 | HLA-DRB1(dist=10405), HLA-DQA1(dist=37165) | intergenic |
| 6 | 32542501 | T | A | rs9269476               | 4.11E-04 | 0.322 | 0.267 | 0.77 | 0.64 | -0.91 | 8.63E-06 | 0.298 | 0.222 | 0.67 | 0.55 | -0.82 | 0.62 | 8.69E-08 | HLA-DRB6(dist=14722), HLA-DQA1(dist=4046)  | intergenic |
| 6 | 32574895 | T | C | rs9271023               | 4.28E-04 | 0.318 | 0.256 | 0.74 | 0.62 | -0.88 | 8.26E-06 | 0.327 | 0.238 | 0.64 | 0.53 | -0.79 | 0.66 | 8.74E-08 | HLA-DRB1(dist=17282), HLA-DQA1(dist=30288) | intergenic |
| 6 | 32580288 | C | G | rs9271252               | 3.62E-04 | 0.292 | 0.228 | 0.71 | 0.6  | -0.86 | 9.78E-06 | 0.324 | 0.236 | 0.64 | 0.53 | -0.79 | 0.66 | 8.75E-08 | HLA-DRB1(dist=22675), HLA-DQA1(dist=28485) | intergenic |
| 6 | 32481838 | A | C | rs181280314             | 2.39E-05 | 0.140 | 0.196 | 0.67 | 0.53 | -0.84 | 2.32E-04 | 0.129 | 0.189 | 0.64 | 0.48 | -0.84 | 0.59 | 8.77E-08 | HLA-DRA(dist=69012), HLA-DRB5(dist=3316)   | intergenic |
| 6 | 32570281 | G | A | rs9270835               | 3.73E-04 | 0.292 | 0.228 | 0.71 | 0.6  | -0.86 | 9.52E-06 | 0.325 | 0.237 | 0.64 | 0.53 | -0.79 | 0.66 | 8.81E-08 | HLA-DRB1(dist=12668), HLA-DQA1(dist=34902) | intergenic |
| 6 | 32570418 | T | G | rs386699448;rs9270841   | 3.83E-04 | 0.292 | 0.228 | 0.71 | 0.6  | -0.86 | 9.17E-06 | 0.325 | 0.237 | 0.64 | 0.53 | -0.79 | 0.66 | 8.82E-08 | HLA-DRB1(dist=12805), HLA-DQA1(dist=34765) | intergenic |
| 6 | 32577549 | A | T | rs9271153               | 3.80E-04 | 0.292 | 0.228 | 0.71 | 0.6  | -0.86 | 9.26E-06 | 0.325 | 0.236 | 0.64 | 0.53 | -0.79 | 0.66 | 8.83E-08 | HLA-DRB1(dist=19936), HLA-DQA1(dist=27634) | intergenic |
| 6 | 32572451 | A | G | rs9270927               | 3.53E-04 | 0.295 | 0.231 | 0.72 | 0.6  | -0.86 | 1.03E-05 | 0.325 | 0.237 | 0.64 | 0.53 | -0.79 | 0.66 | 8.84E-08 | HLA-DRB1(dist=14838), HLA-DQA1(dist=32732) | intergenic |
| 6 | 32569879 | T | G | rs9270816               | 3.73E-04 | 0.292 | 0.228 | 0.71 | 0.6  | -0.86 | 9.58E-06 | 0.325 | 0.236 | 0.64 | 0.53 | -0.79 | 0.66 | 8.87E-08 | HLA-DRB1(dist=12266), HLA-DQA1(dist=35304) | intergenic |
| 6 | 32569790 | C | T | rs9270813               | 3.76E-04 | 0.297 | 0.234 | 0.72 | 0.6  | -0.86 | 9.60E-06 | 0.325 | 0.237 | 0.64 | 0.53 | -0.79 | 0.66 | 8.89E-08 | HLA-DRB1(dist=12177), HLA-DQA1(dist=35393) | intergenic |
| 6 | 32569911 | A | G | rs9270817               | 3.74E-04 | 0.292 | 0.228 | 0.71 | 0.6  | -0.86 | 9.58E-06 | 0.325 | 0.236 | 0.64 | 0.53 | -0.79 | 0.66 | 8.89E-08 | HLA-DRB1(dist=12298), HLA-DQA1(dist=35272) | intergenic |
| 6 | 32576102 | T | C | rs9271083               | 3.94E-04 | 0.303 | 0.239 | 0.72 | 0.6  | -0.86 | 9.01E-06 | 0.325 | 0.236 | 0.64 | 0.53 | -0.79 | 0.66 | 8.91E-08 | HLA-DRB1(dist=18489), HLA-DQA1(dist=29081) | intergenic |
| 6 | 32578612 | T | G | rs9271194               | 3.80E-04 | 0.292 | 0.228 | 0.71 | 0.6  | -0.86 | 9.40E-06 | 0.325 | 0.236 | 0.64 | 0.53 | -0.79 | 0.66 | 8.92E-08 | HLA-DRB1(dist=20999), HLA-DQA1(dist=26571) | intergenic |
| 6 | 32578735 | A | G | rs9271199               | 3.80E-04 | 0.292 | 0.228 | 0.71 | 0.6  | -0.86 | 9.42E-06 | 0.325 | 0.236 | 0.64 | 0.53 | -0.79 | 0.66 | 8.92E-08 | HLA-DRB1(dist=21122), HLA-DQA1(dist=26448) | intergenic |
| 6 | 32578530 | C | A | rs9271192               | 3.79E-04 | 0.292 | 0.228 | 0.71 | 0.6  | -0.86 | 9.43E-06 | 0.325 | 0.236 | 0.64 | 0.53 | -0.79 | 0.66 | 8.92E-08 | HLA-DRB1(dist=20917), HLA-DQA1(dist=26653) | intergenic |
| 6 | 32578566 | T | C | rs9271193               | 3.80E-04 | 0.292 | 0.228 | 0.71 | 0.6  | -0.86 | 9.41E-06 | 0.325 | 0.236 | 0.64 | 0.53 | -0.79 | 0.66 | 8.93E-08 | HLA-DRB1(dist=20953), HLA-DQA1(dist=26617) | intergenic |
| 6 | 32576083 | A | G | rs9271081               | 3.99E-04 | 0.308 | 0.244 | 0.73 | 0.61 | -0.87 | 8.96E-06 | 0.325 | 0.237 | 0.64 | 0.53 | -0.79 | 0.66 | 8.95E-08 | HLA-DRB1(dist=18470), HLA-DQA1(dist=29100) | intergenic |
| 6 | 32578756 | C | T | rs9271200               | 3.80E-04 | 0.292 | 0.228 | 0.71 | 0.6  | -0.86 | 9.48E-06 | 0.325 | 0.23  |      |      |       |      |          |                                            |            |

|   |          |   |   |                        |          |       |       |      |             |          |       |       |      |             |      |          |                                            |                |
|---|----------|---|---|------------------------|----------|-------|-------|------|-------------|----------|-------|-------|------|-------------|------|----------|--------------------------------------------|----------------|
| 6 | 32580357 | C | T | rs9271255              | 3.79E-04 | 0.292 | 0.228 | 0.71 | 0.6 - 0.86  | 9.77E-06 | 0.324 | 0.236 | 0.64 | 0.53 - 0.79 | 0.66 | 9.17E-08 | HLA-DRB1(dist=22744), HLA-DQA1(dist=24826) | intergenic     |
| 6 | 32580741 | A | G | rs3997874              | 3.84E-04 | 0.292 | 0.228 | 0.71 | 0.6 - 0.86  | 9.61E-06 | 0.324 | 0.236 | 0.64 | 0.53 - 0.79 | 0.66 | 9.19E-08 | HLA-DRB1(dist=23128), HLA-DQA1(dist=24442) | intergenic     |
| 6 | 32579769 | T | C | rs9271239;rs386699461  | 3.79E-04 | 0.292 | 0.228 | 0.71 | 0.6 - 0.86  | 9.79E-06 | 0.324 | 0.236 | 0.64 | 0.53 - 0.79 | 0.66 | 9.19E-08 | HLA-DRB1(dist=22156), HLA-DQA1(dist=25414) | intergenic     |
| 6 | 32570609 | C | T | rs9270848              | 3.92E-04 | 0.293 | 0.229 | 0.72 | 0.6 - 0.86  | 9.40E-06 | 0.325 | 0.237 | 0.64 | 0.53 - 0.79 | 0.66 | 9.20E-08 | HLA-DRB1(dist=12996), HLA-DQA1(dist=34574) | intergenic     |
| 6 | 32570228 | T | C | rs9270832              | 3.89E-04 | 0.292 | 0.228 | 0.72 | 0.6 - 0.86  | 9.56E-06 | 0.325 | 0.237 | 0.64 | 0.53 - 0.79 | 0.66 | 9.23E-08 | HLA-DRB1(dist=12615), HLA-DQA1(dist=34955) | intergenic     |
| 6 | 32570221 | G | A | rs9270831              | 3.89E-04 | 0.292 | 0.228 | 0.72 | 0.6 - 0.86  | 9.56E-06 | 0.325 | 0.237 | 0.64 | 0.53 - 0.79 | 0.66 | 9.23E-08 | HLA-DRB1(dist=12608), HLA-DQA1(dist=34962) | intergenic     |
| 6 | 32570577 | A | T | rs9270846              | 3.87E-04 | 0.293 | 0.229 | 0.72 | 0.6 - 0.86  | 9.61E-06 | 0.325 | 0.237 | 0.64 | 0.53 - 0.79 | 0.66 | 9.23E-08 | HLA-DRB1(dist=12964), HLA-DQA1(dist=34606) | intergenic     |
| 6 | 32578196 | G | A | rs9271179              | 3.83E-04 | 0.293 | 0.229 | 0.72 | 0.6 - 0.86  | 9.77E-06 | 0.325 | 0.237 | 0.64 | 0.53 - 0.79 | 0.66 | 9.24E-08 | HLA-DRB1(dist=20583), HLA-DQA1(dist=26987) | intergenic     |
| 6 | 32576247 | T | C | rs9271090              | 3.92E-04 | 0.292 | 0.228 | 0.72 | 0.6 - 0.86  | 9.43E-06 | 0.324 | 0.236 | 0.64 | 0.53 - 0.79 | 0.66 | 9.29E-08 | HLA-DRB1(dist=18634), HLA-DQA1(dist=28936) | intergenic     |
| 6 | 32570776 | C | T | rs9270851              | 3.85E-04 | 0.292 | 0.228 | 0.71 | 0.6 - 0.86  | 9.72E-06 | 0.325 | 0.236 | 0.64 | 0.53 - 0.79 | 0.66 | 9.30E-08 | HLA-DRB1(dist=13163), HLA-DQA1(dist=34407) | intergenic     |
| 6 | 32579940 | T | C | rs9271242              | 3.96E-04 | 0.292 | 0.228 | 0.72 | 0.6 - 0.86  | 9.41E-06 | 0.325 | 0.236 | 0.64 | 0.53 - 0.79 | 0.66 | 9.36E-08 | HLA-DRB1(dist=22327), HLA-DQA1(dist=25243) | intergenic     |
| 6 | 32579833 | T | C | rs9271240              | 3.84E-04 | 0.292 | 0.228 | 0.71 | 0.6 - 0.86  | 9.85E-06 | 0.324 | 0.236 | 0.64 | 0.53 - 0.79 | 0.66 | 9.37E-08 | HLA-DRB1(dist=22220), HLA-DQA1(dist=25350) | intergenic     |
| 6 | 32525915 | A | G | rs185112674            | 1.14E-04 | 0.432 | 0.366 | 0.76 | 0.64 - 0.9  | 5.21E-05 | 0.374 | 0.290 | 0.69 | 0.56 - 0.83 | 0.65 | 9.38E-08 | HLA-DRB6                                   | ncRNA_exonic   |
| 6 | 32568471 | G | A | rs9270754              | 4.01E-04 | 0.293 | 0.229 | 0.72 | 0.6 - 0.86  | 9.55E-06 | 0.324 | 0.236 | 0.64 | 0.53 - 0.79 | 0.66 | 9.38E-08 | HLA-DRB1(dist=10858), HLA-DQA1(dist=36712) | intergenic     |
| 6 | 32576478 | T | C | rs9271100              | 4.07E-04 | 0.292 | 0.228 | 0.72 | 0.6 - 0.86  | 9.16E-06 | 0.325 | 0.236 | 0.64 | 0.53 - 0.79 | 0.66 | 9.39E-08 | HLA-DRB1(dist=18865), HLA-DQA1(dist=28705) | intergenic     |
| 6 | 32576633 | G | A | rs9271108              | 3.75E-04 | 0.297 | 0.232 | 0.72 | 0.6 - 0.86  | 1.02E-05 | 0.324 | 0.236 | 0.65 | 0.53 - 0.79 | 0.66 | 9.39E-08 | HLA-DRB1(dist=19020), HLA-DQA1(dist=28550) | intergenic     |
| 6 | 32590833 | A | G | rs2097431              | 5.60E-05 | 0.440 | 0.359 | 0.71 | 0.61 - 0.84 | 8.46E-05 | 0.305 | 0.225 | 0.66 | 0.54 - 0.81 | 0.68 | 9.41E-08 | HLA-DRB1(dist=33220), HLA-DQA1(dist=14350) | intergenic     |
| 6 | 32577470 | T | G | rs9271150              | 4.26E-04 | 0.296 | 0.232 | 0.72 | 0.6 - 0.86  | 8.69E-06 | 0.325 | 0.237 | 0.64 | 0.53 - 0.79 | 0.66 | 9.42E-08 | HLA-DRB1(dist=19857), HLA-DQA1(dist=27713) | intergenic     |
| 6 | 32567880 | C | T | rs4341046              | 5.10E-04 | 0.295 | 0.233 | 0.73 | 0.6 - 0.87  | 6.90E-06 | 0.328 | 0.238 | 0.68 | 0.52 - 0.78 | 0.66 | 9.43E-08 | HLA-DRB1(dist=10267), HLA-DQA1(dist=37303) | intergenic     |
| 6 | 32458007 | C | T | rs79180982             | 7.03E-07 | 0.334 | 0.258 | 0.70 | 0.58 - 0.83 | 4.62E-03 | 0.251 | 0.201 | 0.75 | 0.6 - 0.93  | 0.62 | 9.44E-08 | HLA-DRA(dist=45181), HLA-DRB5(dist=27147)  | intergenic     |
| 6 | 32577224 | C | G | rs9271145;rs200705269  | 3.83E-04 | 0.294 | 0.230 | 0.72 | 0.6 - 0.86  | 1.01E-05 | 0.325 | 0.237 | 0.64 | 0.53 - 0.79 | 0.66 | 9.45E-08 | HLA-DRB1(dist=19611), HLA-DQA1(dist=27959) | intergenic     |
| 6 | 32572148 | G | A | rs9270908              | 3.99E-04 | 0.292 | 0.228 | 0.72 | 0.6 - 0.86  | 9.41E-06 | 0.324 | 0.236 | 0.64 | 0.53 - 0.79 | 0.66 | 9.47E-08 | HLA-DRB1(dist=14535), HLA-DQA1(dist=33035) | intergenic     |
| 6 | 32569422 | A | T | rs9270804              | 4.15E-04 | 0.329 | 0.267 | 0.74 | 0.62 - 0.89 | 1.03E-05 | 0.351 | 0.260 | 0.65 | 0.53 - 0.79 | 0.66 | 9.49E-08 | HLA-DRB1(dist=11809), HLA-DQA1(dist=35761) | intergenic     |
| 6 | 32571227 | G | A | rs9270874              | 3.90E-04 | 0.292 | 0.228 | 0.71 | 0.6 - 0.86  | 9.83E-06 | 0.325 | 0.237 | 0.64 | 0.53 - 0.79 | 0.66 | 9.49E-08 | HLA-DRB1(dist=13614), HLA-DQA1(dist=33956) | intergenic     |
| 6 | 32580084 | A | G | rs9271246              | 3.92E-04 | 0.292 | 0.228 | 0.72 | 0.6 - 0.86  | 9.75E-06 | 0.324 | 0.236 | 0.64 | 0.53 - 0.79 | 0.66 | 9.49E-08 | HLA-DRB1(dist=22471), HLA-DQA1(dist=25099) | intergenic     |
| 6 | 32459129 | T | C | rs190898689            | 3.03E-06 | 0.234 | 0.300 | 0.71 | 0.59 - 0.86 | 1.56E-03 | 0.265 | 0.328 | 0.74 | 0.6 - 0.91  | 0.62 | 9.49E-08 | HLA-DRA(dist=46303), HLA-DRB5(dist=26025)  | intergenic     |
| 6 | 32578837 | A | C | rs9271202              | 3.99E-04 | 0.292 | 0.228 | 0.72 | 0.6 - 0.86  | 9.58E-06 | 0.325 | 0.236 | 0.64 | 0.53 - 0.79 | 0.66 | 9.50E-08 | HLA-DRB1(dist=21224), HLA-DQA1(dist=26346) | intergenic     |
| 6 | 32580112 | A | G | rs9271247              | 3.91E-04 | 0.292 | 0.228 | 0.72 | 0.6 - 0.86  | 9.77E-06 | 0.324 | 0.236 | 0.64 | 0.53 - 0.79 | 0.66 | 9.50E-08 | HLA-DRB1(dist=22499), HLA-DQA1(dist=25071) | intergenic     |
| 6 | 32577590 | G | A | rs9271156              | 4.11E-04 | 0.292 | 0.228 | 0.72 | 0.6 - 0.86  | 9.17E-06 | 0.325 | 0.236 | 0.64 | 0.53 - 0.79 | 0.66 | 9.51E-08 | HLA-DRB1(dist=19977), HLA-DQA1(dist=27593) | intergenic     |
| 6 | 32580157 | C | T | rs9271248              | 3.91E-04 | 0.292 | 0.228 | 0.72 | 0.6 - 0.86  | 9.80E-06 | 0.324 | 0.236 | 0.64 | 0.53 - 0.79 | 0.66 | 9.52E-08 | HLA-DRB1(dist=22544), HLA-DQA1(dist=32502) | intergenic     |
| 6 | 32577733 | C | T | rs9271163              | 4.08E-04 | 0.292 | 0.228 | 0.72 | 0.6 - 0.86  | 9.21E-06 | 0.324 | 0.236 | 0.64 | 0.53 - 0.79 | 0.66 | 9.53E-08 | HLA-DRB1(dist=20120), HLA-DQA1(dist=27450) | intergenic     |
| 6 | 32572294 | G | T | rs386699450;rs9270917  | 3.87E-06 | 0.236 | 0.166 | 0.65 | 0.53 - 0.79 | 1.31E-03 | 0.217 | 0.159 | 0.68 | 0.54 - 0.86 | 0.62 | 9.54E-08 | HLA-DRB1(dist=14681), HLA-DQA1(dist=32889) | intergenic     |
| 6 | 32568429 | C | T | rs9270753              | 4.11E-04 | 0.293 | 0.230 | 0.72 | 0.6 - 0.86  | 9.49E-06 | 0.324 | 0.236 | 0.64 | 0.53 - 0.79 | 0.66 | 9.57E-08 | HLA-DRB1(dist=10816), HLA-DQA1(dist=36754) | intergenic     |
| 6 | 32580880 | G | A | rs2894378              | 3.98E-04 | 0.292 | 0.228 | 0.72 | 0.6 - 0.86  | 9.70E-06 | 0.325 | 0.236 | 0.64 | 0.53 - 0.79 | 0.66 | 9.61E-08 | HLA-DRB1(dist=23267), HLA-DQA1(dist=24303) | intergenic     |
| 6 | 32573754 | T | A | rs9270978              | 4.23E-04 | 0.294 | 0.230 | 0.72 | 0.6 - 0.86  | 9.06E-06 | 0.325 | 0.236 | 0.64 | 0.53 - 0.79 | 0.66 | 9.67E-08 | HLA-DRB1(dist=16141), HLA-DQA1(dist=31429) | intergenic     |
| 6 | 32572326 | C | T | rs9270921              | 2.88E-04 | 0.300 | 0.235 | 0.72 | 0.6 - 0.86  | 1.59E-05 | 0.328 | 0.241 | 0.65 | 0.53 - 0.8  | 0.66 | 9.73E-08 | HLA-DRB1(dist=14713), HLA-DQA1(dist=32857) | intergenic     |
| 6 | 32572322 | C | T | rs9270920              | 2.88E-04 | 0.300 | 0.235 | 0.72 | 0.6 - 0.86  | 1.59E-05 | 0.328 | 0.241 | 0.65 | 0.53 - 0.8  | 0.66 | 9.76E-08 | HLA-DRB1(dist=14709), HLA-DQA1(dist=32861) | intergenic     |
| 6 | 32497278 | A | G | rs4601179              | 3.16E-07 | 0.300 | 0.228 | 0.69 | 0.57 - 0.82 | 6.87E-03 | 0.219 | 0.172 | 0.74 | 0.59 - 0.93 | 0.60 | 9.76E-08 | HLA-DRB5                                   | intronic       |
| 6 | 32471960 | T | A | rs74654402             | 2.39E-05 | 0.232 | 0.293 | 0.73 | 0.6 - 0.88  | 2.68E-04 | 0.211 | 0.282 | 0.68 | 0.54 - 0.85 | 0.63 | 9.77E-08 | HLA-DRA(dist=59134), HLA-DRB5(dist=13194)  | intergenic     |
| 6 | 32570132 | C | A | rs9270827              | 3.91E-04 | 0.292 | 0.228 | 0.72 | 0.6 - 0.86  | 1.03E-05 | 0.325 | 0.237 | 0.65 | 0.53 - 0.79 | 0.66 | 9.83E-08 | HLA-DRB1(dist=12519), HLA-DQA1(dist=35051) | intergenic     |
| 6 | 32574994 | T | C | rs9271026              | 4.49E-04 | 0.315 | 0.253 | 0.73 | 0.61 - 0.88 | 8.94E-06 | 0.326 | 0.238 | 0.64 | 0.53 - 0.79 | 0.66 | 9.84E-08 | HLA-DRB1(dist=17381), HLA-DQA1(dist=30189) | intergenic     |
| 6 | 32524291 | C | A | rs67776298             | 1.64E-06 | 0.298 | 0.230 | 0.70 | 0.59 - 0.84 | 2.15E-03 | 0.254 | 0.202 | 0.74 | 0.6 - 0.92  | 0.60 | 9.91E-08 | HLA-DRB6                                   | ncRNA_intronic |
| 6 | 32571201 | G | A | rs9270873              | 4.10E-04 | 0.292 | 0.228 | 0.72 | 0.6 - 0.86  | 9.65E-06 | 0.324 | 0.236 | 0.64 | 0.53 - 0.79 | 0.66 | 9.92E-08 | HLA-DRB1(dist=13588), HLA-DQA1(dist=33982) | intergenic     |
| 6 | 32570849 | G | A | rs9270857              | 4.17E-04 | 0.292 | 0.228 | 0.72 | 0.6 - 0.86  | 9.53E-06 | 0.325 | 0.237 | 0.64 | 0.53 - 0.79 | 0.66 | 9.98E-08 | HLA-DRB1(dist=13236), HLA-DQA1(dist=34334) | intergenic     |
| 6 | 32573780 | A | G | rs9270979              | 4.38E-04 | 0.294 | 0.230 | 0.72 | 0.6 - 0.86  | 9.00E-06 | 0.325 | 0.236 | 0.64 | 0.53 - 0.79 | 0.66 | 9.99E-08 | HLA-DRB1(dist=16167), HLA-DQA1(dist=31403) | intergenic     |
| 6 | 32512310 | T | C | rs66954331;rs142650606 | 1.42E-03 | 0.528 | 0.475 | 0.81 | 0.69 - 0.95 | 1.70E-06 | 0.508 | 0.408 | 0.67 | 0.55 - 0.81 | 0.65 | 1.00E-07 | HLA-DRB5(dist=14304), HLA-DRB6(dist=8180)  | intergenic     |
| 6 | 32577715 | G | T | rs386699459;rs9271162  | 4.08E-04 | 0.292 | 0.228 | 0.72 | 0.6 - 0.86  | 9.75E-06 | 0.323 | 0.235 | 0.64 | 0.53 - 0.79 | 0.66 | 1.00E-07 | HLA-DRB1(dist=20102), HLA-DQA1(dist=27468) | intergenic     |
| 6 | 32573543 | C | T | rs9270967              | 4.26E-04 | 0.295 | 0.231 | 0.72 | 0.6 - 0.86  | 9.49E-06 | 0.325 | 0.237 | 0.64 | 0.53 - 0.79 | 0.66 | 1.01E-07 | HLA-DRB1(dist=15930), HLA-DQA1(dist=31640) | intergenic     |
| 6 | 32568538 | A | G | rs9270756              | 4.41E-04 | 0.294 | 0.231 | 0.72 | 0.6 - 0.86  | 9.22E-06 | 0.325 | 0.236 | 0.64 | 0.53 - 0.79 | 0.66 | 1.01E-07 | HLA-DRB1(dist=10925), HLA-DQA1(dist=36645) | intergenic     |
| 6 | 32575925 | G | A | rs9271077              | 4.27E-04 | 0.293 | 0.230 | 0.72 | 0.6 - 0.86  | 9.55E-06 | 0.325 | 0.236 | 0.64 | 0.53 - 0.79 | 0.66 | 1.01E-07 | HLA-DRB1(dist=18312), HLA-DQA1(dist=29258) | intergenic     |
| 6 | 32575930 | C | T | rs9271078              | 4.27E-04 | 0.293 | 0.230 | 0.72 | 0.6 - 0.86  | 9.54E-06 | 0.325 | 0.236 | 0.64 | 0.53 - 0.79 | 0.66 | 1.01E-07 | HLA-DRB1(dist=18317), HLA-DQA1(dist=29253) | intergenic     |
| 6 | 32570859 | C | T | rs9270858              | 4.17E-04 | 0.292 | 0.228 | 0.72 | 0.6 - 0.86  | 9.75E-06 | 0.325 | 0.237 | 0.64 | 0.53 - 0.79 | 0.66 | 1.02E-07 | HLA-DRB1(dist=13246), HLA-DQA1(dist=34324) | intergenic     |
| 6 | 32575852 | A | G | rs9271075              | 4.28E-04 | 0.293 | 0.229 | 0.72 | 0.6 - 0.86  | 9.55E-06 | 0.325 | 0.236 | 0.64 | 0.53 - 0.79 | 0.66 | 1.02E-07 | HLA-DRB1(dist=18239), HLA-DQA1(dist=29331) | intergenic     |
| 6 | 32577889 | T | C | rs9271170              | 4.33E-04 | 0.292 | 0.228 | 0.72 | 0.6 - 0.86  | 9.35E-06 | 0.325 | 0.236 | 0.64 | 0.53 - 0.79 | 0.66 | 1.02E-07 | HLA-DRB1(dist=20276), HLA-DQA1(dist=27294) | intergenic     |
| 6 | 32575849 | G | T | rs9271074              | 4.28E-04 | 0.293 | 0.229 | 0.72 | 0.6 - 0.86  | 9.56E-06 | 0.325 | 0.236 | 0.64 | 0.53 - 0.79 | 0.66 | 1.02E-07 | HLA-DRB1(dist=18236), HLA-DQA1(dist=29334) | intergenic     |
| 6 | 32575290 | T | C | rs9271051              | 4.51E-04 | 0.297 | 0.234 | 0.72 | 0.6 - 0.86  | 8.92E-06 | 0.325 | 0.236 | 0.64 | 0.53 - 0.79 | 0.66 | 1.02E-07 | HLA-DRB1(dist=17677), HLA-DQA1(dist=29893) | intergenic     |
| 6 | 32575873 |   |   |                        |          |       |       |      |             |          |       |       |      |             |      |          |                                            |                |

|   |          |   |   |                                               |          |       |       |      |      |       |          |       |       |      |      |       |      |          |                                            |                |
|---|----------|---|---|-----------------------------------------------|----------|-------|-------|------|------|-------|----------|-------|-------|------|------|-------|------|----------|--------------------------------------------|----------------|
| 6 | 32575406 | A | T | rs9271058                                     | 4.45E-04 | 0.294 | 0.230 | 0.72 | 0.6  | -0.86 | 9.17E-06 | 0.325 | 0.236 | 0.64 | 0.53 | -0.79 | 0.66 | 1.03E-07 | HLA-DRB1(dist=17793), HLA-DQA1(dist=29777) | intergenic     |
| 6 | 32575631 | A | G | rs9271066                                     | 4.31E-04 | 0.294 | 0.230 | 0.72 | 0.6  | -0.86 | 9.62E-06 | 0.326 | 0.237 | 0.64 | 0.53 | -0.79 | 0.66 | 1.03E-07 | HLA-DRB1(dist=18018), HLA-DQA1(dist=29552) | intergenic     |
| 6 | 32573621 | C | T | rs9270972                                     | 4.55E-04 | 0.294 | 0.230 | 0.72 | 0.6  | -0.86 | 8.95E-06 | 0.325 | 0.236 | 0.64 | 0.53 | -0.79 | 0.66 | 1.03E-07 | HLA-DRB1(dist=16008), HLA-DQA1(dist=31562) | intergenic     |
| 6 | 32573598 | T | C | rs9270971                                     | 4.56E-04 | 0.294 | 0.230 | 0.72 | 0.6  | -0.86 | 8.94E-06 | 0.325 | 0.236 | 0.64 | 0.53 | -0.79 | 0.66 | 1.04E-07 | HLA-DRB1(dist=15985), HLA-DQA1(dist=31585) | intergenic     |
| 6 | 32575275 | G | A | rs9271050                                     | 4.73E-04 | 0.296 | 0.233 | 0.72 | 0.6  | -0.87 | 8.58E-06 | 0.325 | 0.236 | 0.64 | 0.53 | -0.79 | 0.66 | 1.04E-07 | HLA-DRB1(dist=17662), HLA-DQA1(dist=29908) | intergenic     |
| 6 | 32573554 | C | T | rs9270968                                     | 4.42E-04 | 0.294 | 0.231 | 0.72 | 0.6  | -0.86 | 9.41E-06 | 0.325 | 0.237 | 0.64 | 0.53 | -0.79 | 0.66 | 1.04E-07 | HLA-DRB1(dist=15941), HLA-DQA1(dist=31629) | intergenic     |
| 6 | 32575265 | T | C | rs9271049                                     | 4.74E-04 | 0.297 | 0.234 | 0.72 | 0.6  | -0.87 | 8.59E-06 | 0.325 | 0.236 | 0.64 | 0.53 | -0.79 | 0.66 | 1.04E-07 | HLA-DRB1(dist=17652), HLA-DQA1(dist=29918) | intergenic     |
| 6 | 32577474 | T | C | rs9271151                                     | 4.69E-04 | 0.295 | 0.231 | 0.72 | 0.6  | -0.86 | 8.67E-06 | 0.325 | 0.237 | 0.64 | 0.53 | -0.79 | 0.66 | 1.04E-07 | HLA-DRB1(dist=19861), HLA-DQA1(dist=27709) | intergenic     |
| 6 | 32573973 | T | C | rs9270983                                     | 4.52E-04 | 0.293 | 0.230 | 0.72 | 0.6  | -0.86 | 9.20E-06 | 0.325 | 0.236 | 0.64 | 0.53 | -0.79 | 0.66 | 1.05E-07 | HLA-DRB1(dist=16360), HLA-DQA1(dist=31210) | intergenic     |
| 6 | 32620800 | A | G | rs17843620;rs20213089                         | 4.89E-05 | 0.293 | 0.368 | 0.71 | 0.6  | -0.85 | 1.42E-04 | 0.286 | 0.372 | 0.68 | 0.55 | -0.83 | 0.68 | 1.05E-07 | HLA-DQA1(dist=9371), HLA-DQB1(dist=6441)   | intergenic     |
| 6 | 32574027 | T | C | rs9270985                                     | 4.54E-04 | 0.293 | 0.230 | 0.72 | 0.6  | -0.86 | 9.23E-06 | 0.325 | 0.236 | 0.64 | 0.53 | -0.79 | 0.66 | 1.06E-07 | HLA-DRB1(dist=16414), HLA-DQA1(dist=31156) | intergenic     |
| 6 | 32458289 | T | A | rs80172909                                    | 3.28E-05 | 0.445 | 0.382 | 0.77 | 0.65 | -0.91 | 2.16E-04 | 0.442 | 0.370 | 0.74 | 0.62 | -0.9  | 0.63 | 1.07E-07 | HLA-DRA(dist=45463), HLA-DRB5(dist=26865)  | intergenic     |
| 6 | 32512506 | A | G | rs72492318                                    | 1.55E-06 | 0.243 | 0.179 | 0.68 | 0.56 | -0.83 | 2.45E-03 | 0.198 | 0.146 | 0.69 | 0.55 | -0.88 | 0.59 | 1.07E-07 | HLA-DRB5(dist=14500), HLA-DRB6(dist=7984)  | intergenic     |
| 6 | 32574127 | T | C | rs9270987;rs386699452                         | 4.55E-04 | 0.293 | 0.230 | 0.72 | 0.6  | -0.86 | 9.32E-06 | 0.325 | 0.236 | 0.64 | 0.53 | -0.79 | 0.66 | 1.07E-07 | HLA-DRB1(dist=16514), HLA-DQA1(dist=31056) | intergenic     |
| 6 | 32575749 | C | T | rs386699456;rs9271072                         | 4.32E-04 | 0.294 | 0.230 | 0.72 | 0.6  | -0.86 | 1.01E-05 | 0.325 | 0.237 | 0.64 | 0.53 | -0.79 | 0.66 | 1.07E-07 | HLA-DRB1(dist=18136), HLA-DQA1(dist=29434) | intergenic     |
| 6 | 32573560 | A | G | rs9270969                                     | 4.61E-04 | 0.294 | 0.231 | 0.72 | 0.6  | -0.86 | 9.24E-06 | 0.325 | 0.237 | 0.64 | 0.53 | -0.79 | 0.66 | 1.07E-07 | HLA-DRB1(dist=15947), HLA-DQA1(dist=31623) | intergenic     |
| 6 | 32573289 | G | A | rs9270961                                     | 5.18E-04 | 0.332 | 0.270 | 0.74 | 0.63 | -0.89 | 8.36E-06 | 0.331 | 0.243 | 0.65 | 0.53 | -0.79 | 0.66 | 1.08E-07 | HLA-DRB1(dist=15676), HLA-DQA1(dist=31894) | intergenic     |
| 6 | 32577907 | C | T | rs9271171;rs386699460                         | 4.57E-04 | 0.292 | 0.229 | 0.72 | 0.6  | -0.86 | 9.35E-06 | 0.325 | 0.236 | 0.64 | 0.53 | -0.79 | 0.66 | 1.08E-07 | HLA-DRB1(dist=20294), HLA-DQA1(dist=27276) | intergenic     |
| 6 | 32543610 | T | A | rs9269519                                     | 7.68E-04 | 0.323 | 0.270 | 0.78 | 0.65 | -0.92 | 5.85E-06 | 0.327 | 0.245 | 0.67 | 0.55 | -0.82 | 0.63 | 1.08E-07 | HLA-DRB6(dist=15831), HLA-DRB1(dist=2937)  | intergenic     |
| 6 | 32567375 | A | G | rs9270711                                     | 5.38E-04 | 0.340 | 0.279 | 0.75 | 0.63 | -0.89 | 8.03E-06 | 0.336 | 0.247 | 0.65 | 0.53 | -0.79 | 0.66 | 1.08E-07 | HLA-DRB1(dist=9762), HLA-DQA1(dist=37808)  | intergenic     |
| 6 | 32516526 | G | T | rs62405636                                    | 1.59E-06 | 0.233 | 0.170 | 0.68 | 0.55 | -0.82 | 2.43E-03 | 0.195 | 0.144 | 0.70 | 0.55 | -0.88 | 0.59 | 1.09E-07 | HLA-DRB5(dist=18520), HLA-DRB6(dist=3964)  | intergenic     |
| 6 | 32606665 | C | T | rs386699545;rs9272533                         | 1.18E-04 | 0.334 | 0.402 | 0.75 | 0.63 | -0.89 | 5.84E-05 | 0.358 | 0.454 | 0.67 | 0.55 | -0.81 | 0.68 | 1.09E-07 | HLA-DQA1                                   | intronic       |
| 6 | 32575319 | C | T | rs9271053                                     | 4.55E-04 | 0.298 | 0.234 | 0.72 | 0.6  | -0.87 | 9.94E-06 | 0.325 | 0.237 | 0.64 | 0.53 | -0.79 | 0.66 | 1.11E-07 | HLA-DRB1(dist=17706), HLA-DQA1(dist=29864) | intergenic     |
| 6 | 32578297 | A | G | rs9271186                                     | 4.62E-04 | 0.294 | 0.231 | 0.72 | 0.6  | -0.86 | 9.67E-06 | 0.325 | 0.236 | 0.64 | 0.53 | -0.79 | 0.66 | 1.11E-07 | HLA-DRB1(dist=20684), HLA-DQA1(dist=26886) | intergenic     |
| 6 | 32565447 | T | C | rs9270627                                     | 6.55E-04 | 0.314 | 0.253 | 0.74 | 0.62 | -0.88 | 6.15E-06 | 0.346 | 0.257 | 0.65 | 0.53 | -0.79 | 0.66 | 1.11E-07 | HLA-DRB1(dist=7834), HLA-DQA1(dist=39736)  | intergenic     |
| 6 | 32573574 | C | T | rs9270970                                     | 4.61E-04 | 0.294 | 0.230 | 0.72 | 0.6  | -0.86 | 9.58E-06 | 0.324 | 0.236 | 0.64 | 0.53 | -0.79 | 0.66 | 1.11E-07 | HLA-DRB1(dist=15961), HLA-DQA1(dist=31609) | intergenic     |
| 6 | 32572461 | G | T | rs9270928                                     | 4.95E-06 | 0.227 | 0.157 | 0.64 | 0.52 | -0.78 | 1.27E-03 | 0.215 | 0.158 | 0.68 | 0.54 | -0.86 | 0.62 | 1.11E-07 | HLA-DRB1(dist=14848), HLA-DQA1(dist=32722) | intergenic     |
| 6 | 32576795 | C | T | rs9271117                                     | 4.90E-04 | 0.332 | 0.271 | 0.75 | 0.63 | -0.89 | 9.55E-06 | 0.324 | 0.236 | 0.64 | 0.53 | -0.79 | 0.66 | 1.11E-07 | HLA-DRB1(dist=19182), HLA-DQA1(dist=28388) | intergenic     |
| 6 | 32569335 | C | T | rs9270800                                     | 5.43E-04 | 0.343 | 0.282 | 0.75 | 0.63 | -0.9  | 8.61E-06 | 0.370 | 0.281 | 0.67 | 0.55 | -0.81 | 0.66 | 1.12E-07 | HLA-DRB1(dist=11722), HLA-DQA1(dist=35848) | intergenic     |
| 6 | 32572659 | C | G | rs9270933                                     | 4.47E-04 | 0.293 | 0.230 | 0.72 | 0.6  | -0.86 | 1.02E-05 | 0.324 | 0.236 | 0.64 | 0.53 | -0.79 | 0.66 | 1.12E-07 | HLA-DRB1(dist=15046), HLA-DQA1(dist=32524) | intergenic     |
| 6 | 32576796 | A | G | rs9271118                                     | 4.90E-04 | 0.332 | 0.271 | 0.75 | 0.63 | -0.89 | 9.72E-06 | 0.325 | 0.237 | 0.64 | 0.53 | -0.79 | 0.66 | 1.12E-07 | HLA-DRB1(dist=19183), HLA-DQA1(dist=28387) | intergenic     |
| 6 | 32553705 | A | G | rs9270048                                     | 5.86E-06 | 0.267 | 0.201 | 0.69 | 0.57 | -0.83 | 1.09E-03 | 0.218 | 0.161 | 0.68 | 0.55 | -0.86 | 0.61 | 1.13E-07 | HLA-DRB1                                   | intronic       |
| 6 | 32620909 | A | G | rs17843625                                    | 5.24E-05 | 0.292 | 0.366 | 0.71 | 0.6  | -0.85 | 1.43E-04 | 0.285 | 0.371 | 0.67 | 0.55 | -0.83 | 0.68 | 1.13E-07 | HLA-DQA1(dist=9480), HLA-DQB1(dist=6332)   | intergenic     |
| 6 | 32572547 | A | T | rs9270931                                     | 4.46E-04 | 0.293 | 0.230 | 0.72 | 0.6  | -0.86 | 1.04E-05 | 0.324 | 0.237 | 0.65 | 0.53 | -0.79 | 0.66 | 1.13E-07 | HLA-DRB1(dist=14934), HLA-DQA1(dist=32636) | intergenic     |
| 6 | 32553160 | T | G | rs112747670                                   | 9.40E-06 | 0.095 | 0.146 | 0.61 | 0.47 | -0.8  | 7.30E-04 | 0.094 | 0.146 | 0.61 | 0.44 | -0.83 | 0.55 | 1.13E-07 | HLA-DRB1                                   | intronic       |
| 6 | 32575309 | T | C | rs9271052                                     | 4.72E-04 | 0.297 | 0.234 | 0.72 | 0.6  | -0.87 | 9.79E-06 | 0.325 | 0.237 | 0.64 | 0.53 | -0.79 | 0.66 | 1.14E-07 | HLA-DRB1(dist=17696), HLA-DQA1(dist=29874) | intergenic     |
| 6 | 32484405 | G | C | rs112317231                                   | 5.56E-06 | 0.279 | 0.344 | 0.74 | 0.62 | -0.88 | 9.97E-04 | 0.359 | 0.427 | 0.75 | 0.62 | -0.91 | 0.62 | 1.14E-07 | HLA-DRB5                                   | downstream     |
| 6 | 32481267 | A | T | rs112929548                                   | 9.27E-07 | 0.327 | 0.322 | 0.72 | 0.61 | -0.85 | 4.90E-03 | 0.270 | 0.219 | 0.76 | 0.61 | -0.94 | 0.62 | 1.14E-07 | HLA-DRA(dist=68441), HLA-DRB5(dist=3887)   | intergenic     |
| 6 | 32469793 | T | C | rs74580628                                    | 7.50E-06 | 0.405 | 0.483 | 0.73 | 0.62 | -0.86 | 9.40E-04 | 0.428 | 0.498 | 0.75 | 0.62 | -0.91 | 0.66 | 1.15E-07 | HLA-DRA(dist=56967), HLA-DRB5(dist=15361)  | intergenic     |
| 6 | 32647098 | C | T | rs565113427                                   | 1.47E-05 | 0.517 | 0.439 | 0.73 | 0.62 | -0.86 | 4.94E-04 | 0.515 | 0.431 | 0.71 | 0.59 | -0.86 | 0.68 | 1.15E-07 | HLA-DQB1(dist=12632), HLA-DQA2(dist=62065) | intergenic     |
| 6 | 32550150 | A | G | rs200463001;rs9269840                         | 4.68E-06 | 0.252 | 0.187 | 0.69 | 0.57 | -0.83 | 1.38E-03 | 0.204 | 0.151 | 0.69 | 0.55 | -0.88 | 0.60 | 1.15E-07 | HLA-DRB1                                   | intronic       |
| 6 | 32567380 | T | C | rs386699443;rs9270712;rs375432544;rs386699444 | 4.10E-04 | 0.344 | 0.281 | 0.75 | 0.63 | -0.89 | 1.29E-05 | 0.340 | 0.253 | 0.66 | 0.54 | -0.8  | 0.66 | 1.15E-07 | HLA-DRB1(dist=9767), HLA-DQA1(dist=37803)  | intergenic     |
| 6 | 32551453 | G | T | rs9269915                                     | 9.60E-06 | 0.228 | 0.171 | 0.70 | 0.57 | -0.85 | 6.86E-04 | 0.207 | 0.151 | 0.68 | 0.54 | -0.86 | 0.58 | 1.15E-07 | HLA-DRB1                                   | intronic       |
| 6 | 32514185 | T | A | rs71534542                                    | 1.84E-06 | 0.236 | 0.173 | 0.68 | 0.56 | -0.82 | 2.36E-03 | 0.197 | 0.146 | 0.69 | 0.55 | -0.88 | 0.59 | 1.16E-07 | HLA-DRB5(dist=16179), HLA-DRB6(dist=6305)  | intergenic     |
| 6 | 32526116 | G | C | rs115428373                                   | 2.20E-04 | 0.450 | 0.387 | 0.77 | 0.65 | -0.91 | 3.20E-05 | 0.410 | 0.321 | 0.68 | 0.56 | -0.83 | 0.66 | 1.16E-07 | HLA-DRB6                                   | ncRNA_intronic |
| 6 | 32648500 | G | T | rs3129781;rs386699622                         | 1.59E-06 | 0.207 | 0.142 | 0.63 | 0.51 | -0.78 | 3.03E-03 | 0.192 | 0.143 | 0.70 | 0.55 | -0.9  | 0.60 | 1.16E-07 | HLA-DQB1(dist=14034), HLA-DQA2(dist=60663) | intergenic     |
| 6 | 32566577 | C | T | rs4329147                                     | 5.63E-06 | 0.227 | 0.159 | 0.64 | 0.53 | -0.78 | 1.18E-03 | 0.216 | 0.158 | 0.68 | 0.54 | -0.86 | 0.62 | 1.16E-07 | HLA-DRB1(dist=8964), HLA-DQA1(dist=38606)  | intergenic     |
| 6 | 32514248 | A | T | rs67255973                                    | 1.86E-06 | 0.236 | 0.173 | 0.68 | 0.56 | -0.82 | 2.35E-03 | 0.198 | 0.146 | 0.69 | 0.55 | -0.88 | 0.59 | 1.16E-07 | HLA-DRB5(dist=16242), HLA-DRB6(dist=6242)  | intergenic     |
| 6 | 32510769 | C | T | rs376873017;rs112628749                       | 3.37E-04 | 0.150 | 0.199 | 0.71 | 0.57 | -0.89 | 1.61E-05 | 0.131 | 0.205 | 0.59 | 0.45 | -0.77 | 0.60 | 1.16E-07 | HLA-DRB5(dist=12763), HLA-DRB6(dist=9721)  | intergenic     |
| 6 | 32573713 | C | A | rs9270974                                     | 4.99E-04 | 0.296 | 0.232 | 0.72 | 0.6  | -0.87 | 9.28E-06 | 0.325 | 0.236 | 0.64 | 0.53 | -0.79 | 0.66 | 1.17E-07 | HLA-DRB1(dist=16100), HLA-DQA1(dist=31470) | intergenic     |
| 6 | 32576052 | G | C | rs9271079                                     | 5.04E-04 | 0.296 | 0.233 | 0.72 | 0.6  | -0.87 | 9.16E-06 | 0.325 | 0.236 | 0.64 | 0.53 | -0.79 | 0.66 | 1.17E-07 | HLA-DRB1(dist=18439), HLA-DQA1(dist=29131) | intergenic     |
| 6 | 32569250 | C | T | rs9270793                                     | 5.93E-04 | 0.409 | 0.354 | 0.79 | 0.67 | -0.93 | 1.02E-05 | 0.416 | 0.328 | 0.68 | 0.56 | -0.83 | 0.65 | 1.17E-07 | HLA-DRB1(dist=11637), HLA-DQA1(dist=35933) | intergenic     |
| 6 | 32578357 | C | T | rs9271189                                     | 5.29E-04 | 0.293 | 0.230 | 0.72 | 0.6  | -0.87 | 8.57E-06 | 0.325 | 0.236 | 0.64 | 0.53 | -0.79 | 0.66 | 1.18E-07 | HLA-DRB1(dist=20744), HLA-DQA1(dist=26826) | intergenic     |
| 6 | 32519108 | G | C | rs28639433                                    | 1.31E-06 | 0.231 | 0.168 | 0.67 | 0.55 | -0.82 | 2.92E-03 | 0.196 | 0.146 | 0.70 | 0.55 | -0.89 | 0.59 | 1.19E-07 | HLA-DRB5(dist=21102), HLA-DRB6(dist=1382)  | intergenic     |
| 6 | 32517293 | T | C | rs67965605                                    | 1.52E-06 | 0.243 | 0.179 | 0.68 | 0.56 | -0.82 | 2.80E-03 | 0.196 | 0.    |      |      |       |      |          |                                            |                |



|   |          |   |   |                                               |          |       |       |      |      |       |          |       |       |      |      |       |      |          |                                            |                |
|---|----------|---|---|-----------------------------------------------|----------|-------|-------|------|------|-------|----------|-------|-------|------|------|-------|------|----------|--------------------------------------------|----------------|
| 6 | 32507752 | T | G | rs67382147                                    | 3.85E-06 | 0.250 | 0.186 | 0.69 | 0.57 | -0.83 | 1.66E-03 | 0.198 | 0.146 | 0.69 | 0.55 | -0.88 | 0.60 | 1.28E-07 | HLA-DRB5(dist=9746), HLA-DRB6(dist=12738)  | intergenic     |
| 6 | 32520816 | G | C | rs58495148                                    | 8.25E-07 | 0.224 | 0.162 | 0.67 | 0.55 | -0.82 | 4.26E-03 | 0.184 | 0.139 | 0.71 | 0.56 | -0.91 | 0.58 | 1.28E-07 | HLA-DRB6                                   | ncRNA_exonic   |
| 6 | 32581502 | C | T | rs386699462;rs3104416                         | 5.35E-04 | 0.296 | 0.234 | 0.72 | 0.6  | -0.87 | 9.49E-06 | 0.325 | 0.236 | 0.64 | 0.53 | -0.79 | 0.66 | 1.29E-07 | HLA-DRB1(dist=23889), HLA-DQA1(dist=23681) | intergenic     |
| 6 | 32506982 | A | G | rs79468266                                    | 4.44E-06 | 0.256 | 0.194 | 0.70 | 0.58 | -0.85 | 1.52E-03 | 0.203 | 0.151 | 0.70 | 0.55 | -0.88 | 0.59 | 1.29E-07 | HLA-DRB5(dist=8976), HLA-DRB6(dist=13508)  | intergenic     |
| 6 | 32540551 | G | C | rs9269351                                     | 5.30E-04 | 0.361 | 0.303 | 0.77 | 0.65 | -0.91 | 9.09E-06 | 0.314 | 0.233 | 0.67 | 0.54 | -0.81 | 0.64 | 1.30E-07 | HLA-DRB6(dist=12772), HLA-DRB1(dist=5996)  | intergenic     |
| 6 | 32540552 | T | C | rs9269352                                     | 5.30E-04 | 0.361 | 0.303 | 0.77 | 0.65 | -0.91 | 9.09E-06 | 0.314 | 0.233 | 0.67 | 0.54 | -0.81 | 0.64 | 1.30E-07 | HLA-DRB6(dist=12773), HLA-DRB1(dist=5995)  | intergenic     |
| 6 | 32580446 | G | A | rs9271258                                     | 6.62E-04 | 0.291 | 0.230 | 0.73 | 0.61 | -0.87 | 7.40E-06 | 0.325 | 0.236 | 0.64 | 0.52 | -0.78 | 0.66 | 1.31E-07 | HLA-DRB1(dist=22833), HLA-DQA1(dist=24737) | intergenic     |
| 6 | 32580507 | A | C | rs9271260                                     | 4.75E-04 | 0.293 | 0.230 | 0.72 | 0.6  | -0.86 | 1.14E-05 | 0.324 | 0.236 | 0.65 | 0.53 | -0.79 | 0.66 | 1.31E-07 | HLA-DRB1(dist=22894), HLA-DQA1(dist=24676) | intergenic     |
| 6 | 32580411 | A | G | rs9271256                                     | 6.25E-06 | 0.222 | 0.154 | 0.64 | 0.52 | -0.78 | 1.23E-03 | 0.214 | 0.156 | 0.68 | 0.54 | -0.86 | 0.62 | 1.31E-07 | HLA-DRB1(dist=22798), HLA-DQA1(dist=24772) | intergenic     |
| 6 | 32570839 | A | G | rs386699449;rs9270856                         | 5.42E-04 | 0.292 | 0.230 | 0.72 | 0.6  | -0.87 | 9.59E-06 | 0.325 | 0.237 | 0.64 | 0.53 | -0.79 | 0.66 | 1.32E-07 | HLA-DRB1(dist=13226), HLA-DQA1(dist=34344) | intergenic     |
| 6 | 32576076 | C | T | rs9271080                                     | 6.46E-06 | 0.236 | 0.167 | 0.65 | 0.53 | -0.79 | 1.23E-03 | 0.216 | 0.158 | 0.68 | 0.54 | -0.86 | 0.62 | 1.32E-07 | HLA-DRB1(dist=18463), HLA-DQA1(dist=29107) | intergenic     |
| 6 | 32456262 | C | G | rs200016825;rs77490899                        | 1.87E-05 | 0.386 | 0.454 | 0.76 | 0.64 | -0.9  | 4.67E-04 | 0.567 | 0.493 | 0.74 | 0.61 | -0.9  | 0.65 | 1.32E-07 | HLA-DRA(dist=43436), HLA-DRB5(dist=28892)  | intergenic     |
| 6 | 32506681 | C | A | rs75466806                                    | 6.21E-05 | 0.160 | 0.218 | 0.68 | 0.55 | -0.85 | 1.43E-04 | 0.154 | 0.227 | 0.62 | 0.48 | -0.8  | 0.63 | 1.33E-07 | HLA-DRB5(dist=8675), HLA-DRB6(dist=13809)  | intergenic     |
| 6 | 32555253 | A | C | rs9270142                                     | 7.51E-06 | 0.234 | 0.171 | 0.67 | 0.55 | -0.82 | 1.09E-03 | 0.202 | 0.149 | 0.69 | 0.55 | -0.87 | 0.60 | 1.35E-07 | HLA-DRB1                                   | intronic       |
| 6 | 32567381 | G | A | rs386699443;rs375432544;rs386699444;rs9270713 | 4.63E-04 | 0.342 | 0.280 | 0.75 | 0.63 | -0.89 | 1.34E-05 | 0.342 | 0.255 | 0.66 | 0.54 | -0.8  | 0.66 | 1.35E-07 | HLA-DRB1(dist=9768), HLA-DQA1(dist=37802)  | intergenic     |
| 6 | 32520338 | A | G | rs67077728                                    | 8.69E-07 | 0.220 | 0.158 | 0.67 | 0.54 | -0.81 | 4.28E-03 | 0.180 | 0.134 | 0.71 | 0.55 | -0.9  | 0.58 | 1.35E-07 | HLA-DRB6                                   | downstream     |
| 6 | 32548403 | G | A | rs28732275                                    | 1.45E-04 | 0.111 | 0.151 | 0.70 | 0.54 | -0.9  | 5.36E-05 | 0.096 | 0.150 | 0.60 | 0.44 | -0.82 | 0.53 | 1.35E-07 | HLA-DRB1                                   | intronic       |
| 6 | 32542086 | A | T | rs9269454                                     | 1.01E-03 | 0.317 | 0.264 | 0.78 | 0.65 | -0.93 | 5.39E-06 | 0.320 | 0.235 | 0.65 | 0.53 | -0.8  | 0.64 | 1.35E-07 | HLA-DRB6(dist=14307), HLA-DRB1(dist=4461)  | intergenic     |
| 6 | 32517489 | T | G | rs67048162                                    | 2.01E-06 | 0.233 | 0.171 | 0.68 | 0.56 | -0.83 | 2.53E-03 | 0.196 | 0.145 | 0.70 | 0.55 | -0.89 | 0.59 | 1.36E-07 | HLA-DRB5(dist=19483), HLA-DRB6(dist=3001)  | intergenic     |
| 6 | 32575369 | G | T | rs9271055                                     | 7.23E-06 | 0.225 | 0.156 | 0.64 | 0.52 | -0.78 | 1.15E-03 | 0.216 | 0.158 | 0.68 | 0.54 | -0.86 | 0.62 | 1.36E-07 | HLA-DRB1(dist=17756), HLA-DQA1(dist=29814) | intergenic     |
| 6 | 32577011 | A | G | rs9271136                                     | 4.86E-04 | 0.377 | 0.316 | 0.76 | 0.65 | -0.91 | 1.30E-05 | 0.372 | 0.286 | 0.67 | 0.56 | -0.82 | 0.66 | 1.37E-07 | HLA-DRB1(dist=19399), HLA-DQA1(dist=28172) | intergenic     |
| 6 | 32584625 | A | G | rs3129758                                     | 1.53E-03 | 0.420 | 0.354 | 0.76 | 0.64 | -0.9  | 1.85E-06 | 0.464 | 0.358 | 0.64 | 0.53 | -0.78 | 0.70 | 1.39E-07 | HLA-DRB1(dist=27012), HLA-DQA1(dist=20558) | intergenic     |
| 6 | 32514457 | C | T | rs67426377                                    | 5.04E-04 | 0.326 | 0.270 | 0.77 | 0.64 | -0.91 | 1.50E-05 | 0.334 | 0.250 | 0.67 | 0.55 | -0.81 | 0.64 | 1.40E-07 | HLA-DRB5(dist=16451), HLA-DRB6(dist=6033)  | intergenic     |
| 6 | 32484651 | A | C | rs76153169                                    | 1.08E-06 | 0.393 | 0.473 | 0.72 | 0.61 | -0.85 | 4.93E-03 | 0.530 | 0.469 | 0.78 | 0.65 | -0.94 | 0.66 | 1.41E-07 | HLA-DRB5                                   | downstream     |
| 6 | 32571932 | A | G | rs9270900                                     | 3.55E-04 | 0.377 | 0.473 | 0.74 | 0.62 | -0.88 | 2.02E-05 | 0.345 | 0.258 | 0.66 | 0.54 | -0.81 | 0.67 | 1.42E-07 | HLA-DRB1(dist=14319), HLA-DQA1(dist=33251) | intergenic     |
| 6 | 32565438 | C | G | rs9270625                                     | 7.28E-04 | 0.310 | 0.249 | 0.74 | 0.62 | -0.88 | 7.24E-06 | 0.332 | 0.243 | 0.65 | 0.53 | -0.79 | 0.66 | 1.43E-07 | HLA-DRB1(dist=7825), HLA-DQA1(dist=39745)  | intergenic     |
| 6 | 32522339 | A | G | rs36192217                                    | 1.76E-06 | 0.234 | 0.172 | 0.68 | 0.56 | -0.83 | 2.79E-03 | 0.197 | 0.146 | 0.70 | 0.55 | -0.88 | 0.59 | 1.43E-07 | HLA-DRB6                                   | ncRNA_intronic |
| 6 | 32574060 | A | C | rs9270986                                     | 7.06E-06 | 0.225 | 0.156 | 0.64 | 0.52 | -0.78 | 1.23E-03 | 0.215 | 0.158 | 0.68 | 0.54 | -0.86 | 0.62 | 1.44E-07 | HLA-DRB1(dist=16447), HLA-DQA1(dist=31123) | intergenic     |
| 6 | 32574954 | T | C | rs9271024                                     | 6.82E-04 | 0.320 | 0.259 | 0.74 | 0.62 | -0.89 | 8.36E-06 | 0.327 | 0.238 | 0.64 | 0.53 | -0.79 | 0.66 | 1.44E-07 | HLA-DRB1(dist=17341), HLA-DQA1(dist=30229) | intergenic     |
| 6 | 32568200 | G | C | rs9270742                                     | 4.55E-04 | 0.376 | 0.314 | 0.76 | 0.64 | -0.9  | 1.44E-05 | 0.339 | 0.253 | 0.66 | 0.54 | -0.81 | 0.66 | 1.45E-07 | HLA-DRB1(dist=10587), HLA-DQA1(dist=36983) | intergenic     |
| 6 | 32577785 | A | G | rs9271165                                     | 6.32E-04 | 0.308 | 0.247 | 0.74 | 0.62 | -0.88 | 9.20E-06 | 0.325 | 0.237 | 0.64 | 0.53 | -0.79 | 0.66 | 1.46E-07 | HLA-DRB1(dist=20172), HLA-DQA1(dist=27398) | intergenic     |
| 6 | 32574676 | A | G | rs9271011                                     | 6.32E-04 | 0.307 | 0.246 | 0.74 | 0.62 | -0.88 | 8.00E-06 | 0.326 | 0.237 | 0.64 | 0.53 | -0.78 | 0.66 | 1.46E-07 | HLA-DRB1(dist=17063), HLA-DQA1(dist=30507) | intergenic     |
| 6 | 32522389 | T | G | rs36149991                                    | 1.79E-06 | 0.236 | 0.174 | 0.68 | 0.56 | -0.83 | 2.83E-03 | 0.196 | 0.146 | 0.70 | 0.55 | -0.89 | 0.59 | 1.47E-07 | HLA-DRB6                                   | ncRNA_intronic |
| 6 | 32340374 | T | A | rs77709710                                    | 1.96E-05 | 0.217 | 0.155 | 1.51 | 1.24 | -1.86 | 5.22E-04 | 0.203 | 0.138 | 1.59 | 1.25 | -2.01 | 1.61 | 1.48E-07 | C6orf10                                    | upstream       |
| 6 | 32578885 | T | C | rs9271203                                     | 7.67E-06 | 0.224 | 0.156 | 0.64 | 0.52 | -0.78 | 1.19E-03 | 0.215 | 0.158 | 0.68 | 0.54 | -0.86 | 0.62 | 1.48E-07 | HLA-DRB1(dist=21272), HLA-DQA1(dist=26298) | intergenic     |
| 6 | 32522434 | T | G | rs35570280                                    | 2.43E-06 | 0.230 | 0.169 | 0.68 | 0.56 | -0.83 | 2.33E-03 | 0.195 | 0.144 | 0.69 | 0.55 | -0.88 | 0.59 | 1.48E-07 | HLA-DRB6                                   | ncRNA_intronic |
| 6 | 32579951 | C | T | rs9271243                                     | 6.04E-04 | 0.293 | 0.230 | 0.72 | 0.6  | -0.87 | 9.65E-06 | 0.324 | 0.236 | 0.64 | 0.53 | -0.79 | 0.67 | 1.48E-07 | HLA-DRB1(dist=22338), HLA-DQA1(dist=25232) | intergenic     |
| 6 | 32576086 | T | C | rs9271082                                     | 7.42E-06 | 0.240 | 0.171 | 0.66 | 0.54 | -0.8  | 1.23E-03 | 0.216 | 0.158 | 0.68 | 0.54 | -0.86 | 0.63 | 1.49E-07 | HLA-DRB1(dist=18473), HLA-DQA1(dist=29097) | intergenic     |
| 6 | 32513575 | G | T | rs35997662                                    | 1.40E-06 | 0.221 | 0.161 | 0.68 | 0.55 | -0.83 | 3.34E-03 | 0.181 | 0.133 | 0.70 | 0.55 | -0.89 | 0.58 | 1.49E-07 | HLA-DRB5(dist=15569), HLA-DRB6(dist=6915)  | intergenic     |
| 6 | 32577784 | C | T | rs9271164                                     | 6.30E-04 | 0.308 | 0.246 | 0.74 | 0.62 | -0.88 | 9.40E-06 | 0.324 | 0.236 | 0.64 | 0.53 | -0.79 | 0.66 | 1.49E-07 | HLA-DRB1(dist=20171), HLA-DQA1(dist=27399) | intergenic     |
| 6 | 32534028 | T | C | rs79433911                                    | 4.19E-06 | 0.271 | 0.204 | 0.69 | 0.57 | -0.83 | 1.92E-03 | 0.212 | 0.158 | 0.70 | 0.56 | -0.88 | 0.61 | 1.49E-07 | HLA-DRB6(dist=6249), HLA-DRB1(dist=12519)  | intergenic     |
| 6 | 32577531 | T | C | rs9271152                                     | 7.14E-06 | 0.225 | 0.156 | 0.64 | 0.52 | -0.78 | 1.29E-03 | 0.215 | 0.158 | 0.68 | 0.54 | -0.86 | 0.63 | 1.53E-07 | HLA-DRB1(dist=19918), HLA-DQA1(dist=27652) | intergenic     |
| 6 | 32498134 | C | A | rs62405579                                    | 2.63E-06 | 0.272 | 0.207 | 0.70 | 0.58 | -0.85 | 2.44E-03 | 0.210 | 0.158 | 0.71 | 0.56 | -0.89 | 0.60 | 1.53E-07 | HLA-DRB5                                   | upstream       |
| 6 | 32455502 | A | T | rs78031022                                    | 3.02E-05 | 0.295 | 0.360 | 0.74 | 0.62 | -0.89 | 3.52E-04 | 0.324 | 0.393 | 0.74 | 0.61 | -0.9  | 0.64 | 1.53E-07 | HLA-DRA(dist=42676), HLA-DRB5(dist=29652)  | intergenic     |
| 6 | 32575378 | T | C | rs9271056                                     | 7.45E-06 | 0.225 | 0.156 | 0.64 | 0.52 | -0.78 | 1.26E-03 | 0.215 | 0.158 | 0.68 | 0.54 | -0.86 | 0.63 | 1.54E-07 | HLA-DRB1(dist=17765), HLA-DQA1(dist=29805) | intergenic     |
| 6 | 32572911 | A | G | rs9270944                                     | 6.17E-04 | 0.299 | 0.237 | 0.73 | 0.61 | -0.87 | 9.67E-06 | 0.324 | 0.236 | 0.64 | 0.53 | -0.79 | 0.67 | 1.54E-07 | HLA-DRB1(dist=15298), HLA-DQA1(dist=32272) | intergenic     |
| 6 | 32507296 | G | T | rs113795374                                   | 2.74E-06 | 0.293 | 0.225 | 0.70 | 0.58 | -0.84 | 2.59E-03 | 0.223 | 0.170 | 0.72 | 0.57 | -0.9  | 0.61 | 1.54E-07 | HLA-DRB5(dist=9290), HLA-DRB6(dist=13194)  | intergenic     |
| 6 | 32574250 | T | C | rs9270994                                     | 7.53E-06 | 0.225 | 0.156 | 0.64 | 0.52 | -0.78 | 1.26E-03 | 0.215 | 0.158 | 0.68 | 0.54 | -0.86 | 0.63 | 1.54E-07 | HLA-DRB1(dist=16637), HLA-DQA1(dist=30933) | intergenic     |
| 6 | 32575544 | A | T | rs9271061                                     | 7.22E-06 | 0.225 | 0.156 | 0.64 | 0.52 | -0.78 | 1.30E-03 | 0.215 | 0.158 | 0.68 | 0.54 | -0.86 | 0.63 | 1.55E-07 | HLA-DRB1(dist=17931), HLA-DQA1(dist=29639) | intergenic     |
| 6 | 32537511 | G | C | rs149318044                                   | 7.38E-04 | 0.379 | 0.321 | 0.78 | 0.66 | -0.92 | 9.35E-06 | 0.356 | 0.269 | 0.66 | 0.55 | -0.81 | 0.65 | 1.55E-07 | HLA-DRB6(dist=9732), H                     |                |

|   |          |   |   |                                              |          |       |       |      |      |       |          |       |       |      |      |       |      |          |                                            |                |
|---|----------|---|---|----------------------------------------------|----------|-------|-------|------|------|-------|----------|-------|-------|------|------|-------|------|----------|--------------------------------------------|----------------|
| 6 | 32514030 | G | C | rs72844114                                   | 4.90E-04 | 0.324 | 0.269 | 0.77 | 0.64 | -0.91 | 1.89E-05 | 0.338 | 0.255 | 0.67 | 0.55 | -0.82 | 0.65 | 1.61E-07 | HLA-DRB5(dist=16024), HLA-DRB6(dist=6460)  | intergenic     |
| 6 | 32569158 | T | C | rs9270785                                    | 7.38E-04 | 0.356 | 0.298 | 0.77 | 0.65 | -0.91 | 9.49E-06 | 0.361 | 0.275 | 0.67 | 0.55 | -0.82 | 0.66 | 1.62E-07 | HLA-DRB1(dist=11545), HLA-DQA1(dist=36025) | intergenic     |
| 6 | 32557127 | A | C | rs9270265                                    | 2.98E-04 | 0.296 | 0.239 | 0.75 | 0.62 | -0.89 | 2.85E-05 | 0.285 | 0.215 | 0.68 | 0.56 | -0.84 | 0.62 | 1.62E-07 | HLA-DRB1                                   | intronic       |
| 6 | 32578941 | G | A | rs9271205                                    | 6.27E-04 | 0.295 | 0.233 | 0.73 | 0.61 | -0.87 | 1.02E-05 | 0.324 | 0.236 | 0.65 | 0.53 | -0.79 | 0.67 | 1.62E-07 | HLA-DRB1(dist=21328), HLA-DQA1(dist=26242) | intergenic     |
| 6 | 32520707 | G | C | rs66723041                                   | 1.92E-06 | 0.232 | 0.170 | 0.68 | 0.56 | -0.83 | 2.97E-03 | 0.200 | 0.150 | 0.71 | 0.56 | -0.89 | 0.59 | 1.63E-07 | HLA-DRB6                                   | ncRNA_exonic   |
| 6 | 32543923 | C | T | rs9269536                                    | 1.03E-03 | 0.232 | 0.271 | 0.78 | 0.65 | -0.93 | 6.75E-06 | 0.324 | 0.241 | 0.66 | 0.54 | -0.81 | 0.64 | 1.63E-07 | HLA-DRB6(dist=16144), HLA-DRB1(dist=2624)  | intergenic     |
| 6 | 32554351 | T | C | rs9270089                                    | 9.68E-06 | 0.211 | 0.155 | 0.68 | 0.56 | -0.84 | 9.78E-04 | 0.195 | 0.143 | 0.69 | 0.54 | -0.87 | 0.58 | 1.65E-07 | HLA-DRB1                                   | intronic       |
| 6 | 32493017 | C | A | rs58427731                                   | 1.30E-05 | 0.310 | 0.245 | 0.72 | 0.6  | -0.86 | 8.40E-04 | 0.234 | 0.180 | 0.72 | 0.57 | -0.9  | 0.61 | 1.65E-07 | HLA-DRB5                                   | intronic       |
| 6 | 32573442 | T | A | rs9270964                                    | 6.94E-04 | 0.307 | 0.247 | 0.74 | 0.62 | -0.88 | 9.46E-06 | 0.329 | 0.241 | 0.65 | 0.53 | -0.79 | 0.67 | 1.66E-07 | HLA-DRB1(dist=15829), HLA-DQA1(dist=31741) | intergenic     |
| 6 | 32572757 | A | G | rs9270937                                    | 6.86E-04 | 0.298 | 0.236 | 0.73 | 0.61 | -0.87 | 9.24E-06 | 0.325 | 0.237 | 0.64 | 0.53 | -0.79 | 0.67 | 1.66E-07 | HLA-DRB1(dist=15144), HLA-DQA1(dist=32426) | intergenic     |
| 6 | 32545908 | G | A | rs35326463                                   | 1.04E-05 | 0.412 | 0.479 | 0.76 | 0.65 | -0.9  | 1.03E-03 | 0.393 | 0.452 | 0.79 | 0.65 | -0.95 | 0.62 | 1.66E-07 | HLA-DRB1                                   | downstream     |
| 6 | 32575584 | A | G | rs9271063                                    | 6.78E-04 | 0.298 | 0.236 | 0.73 | 0.61 | -0.87 | 9.36E-06 | 0.324 | 0.236 | 0.64 | 0.53 | -0.79 | 0.67 | 1.66E-07 | HLA-DRB1(dist=17971), HLA-DQA1(dist=29599) | intergenic     |
| 6 | 32543733 | T | C | rs9269529;rs71535478                         | 1.50E-03 | 0.315 | 0.264 | 0.78 | 0.65 | -0.93 | 4.14E-06 | 0.329 | 0.244 | 0.66 | 0.54 | -0.8  | 0.64 | 1.67E-07 | HLA-DRB6(dist=15954), HLA-DRB1(dist=2814)  | intergenic     |
| 6 | 32574438 | G | A | rs9270999                                    | 6.92E-04 | 0.298 | 0.236 | 0.73 | 0.61 | -0.87 | 9.30E-06 | 0.325 | 0.236 | 0.64 | 0.53 | -0.79 | 0.67 | 1.68E-07 | HLA-DRB1(dist=16825), HLA-DQA1(dist=30745) | intergenic     |
| 6 | 32566011 | C | A | rs9270656                                    | 6.64E-06 | 0.226 | 0.158 | 0.64 | 0.53 | -0.79 | 1.49E-03 | 0.215 | 0.158 | 0.69 | 0.55 | -0.86 | 0.62 | 1.68E-07 | HLA-DRB1(dist=8398), HLA-DQA1(dist=39172)  | intergenic     |
| 6 | 32512539 | C | T | rs66857824                                   | 1.71E-06 | 0.222 | 0.162 | 0.68 | 0.56 | -0.83 | 3.26E-03 | 0.180 | 0.133 | 0.70 | 0.55 | -0.89 | 0.58 | 1.68E-07 | HLA-DRB5(dist=14533), HLA-DRB6(dist=7951)  | intergenic     |
| 6 | 32572701 | A | G | rs9270935                                    | 6.93E-04 | 0.297 | 0.236 | 0.73 | 0.61 | -0.87 | 9.22E-06 | 0.324 | 0.236 | 0.64 | 0.53 | -0.79 | 0.67 | 1.68E-07 | HLA-DRB1(dist=15088), HLA-DQA1(dist=32482) | intergenic     |
| 6 | 32568096 | T | C | rs9270735                                    | 3.72E-04 | 0.382 | 0.319 | 0.76 | 0.64 | -0.9  | 2.29E-05 | 0.337 | 0.253 | 0.67 | 0.55 | -0.81 | 0.67 | 1.69E-07 | HLA-DRB1(dist=10483), HLA-DQA1(dist=37087) | intergenic     |
| 6 | 32513883 | T | C | rs33998225                                   | 1.75E-06 | 0.224 | 0.164 | 0.68 | 0.56 | -0.83 | 3.27E-03 | 0.180 | 0.133 | 0.70 | 0.55 | -0.89 | 0.58 | 1.70E-07 | HLA-DRB5(dist=15877), HLA-DRB6(dist=6607)  | intergenic     |
| 6 | 32572961 | G | C | rs9270947                                    | 6.75E-04 | 0.315 | 0.253 | 0.74 | 0.62 | -0.88 | 9.57E-06 | 0.325 | 0.237 | 0.64 | 0.53 | -0.79 | 0.67 | 1.70E-07 | HLA-DRB1(dist=15348), HLA-DQA1(dist=32222) | intergenic     |
| 6 | 3256367  | G | A | rs9270206                                    | 6.68E-04 | 0.319 | 0.264 | 0.77 | 0.64 | -0.91 | 9.28E-06 | 0.292 | 0.214 | 0.66 | 0.54 | -0.81 | 0.64 | 1.71E-07 | HLA-DRB1                                   | intronic       |
| 6 | 32575601 | A | G | rs9271064                                    | 6.94E-04 | 0.298 | 0.236 | 0.73 | 0.61 | -0.87 | 9.49E-06 | 0.325 | 0.236 | 0.64 | 0.53 | -0.79 | 0.67 | 1.71E-07 | HLA-DRB1(dist=17988), HLA-DQA1(dist=29582) | intergenic     |
| 6 | 32522650 | T | C | rs35455030                                   | 1.44E-06 | 0.221 | 0.160 | 0.67 | 0.55 | -0.82 | 3.84E-03 | 0.180 | 0.133 | 0.70 | 0.55 | -0.9  | 0.59 | 1.71E-07 | HLA-DRB6                                   | ncRNA_exonic   |
| 6 | 32572975 | T | C | rs9270949                                    | 6.72E-04 | 0.315 | 0.253 | 0.74 | 0.62 | -0.88 | 9.73E-06 | 0.324 | 0.236 | 0.64 | 0.53 | -0.79 | 0.67 | 1.73E-07 | HLA-DRB1(dist=15362), HLA-DQA1(dist=32208) | intergenic     |
| 6 | 32572972 | C | T | rs9270948                                    | 6.74E-04 | 0.315 | 0.253 | 0.74 | 0.62 | -0.88 | 9.80E-06 | 0.325 | 0.237 | 0.64 | 0.53 | -0.79 | 0.67 | 1.73E-07 | HLA-DRB1(dist=15359), HLA-DQA1(dist=32211) | intergenic     |
| 6 | 32456731 | G | T | rs78855616                                   | 5.74E-06 | 0.359 | 0.431 | 0.74 | 0.63 | -0.88 | 1.76E-03 | 0.561 | 0.495 | 0.77 | 0.64 | -0.93 | 0.65 | 1.73E-07 | HLA-DRA(dist=43905), HLA-DRB5(dist=28423)  | intergenic     |
| 6 | 32484807 | T | C | rs186378979                                  | 4.70E-06 | 0.273 | 0.339 | 0.73 | 0.61 | -0.88 | 1.90E-03 | 0.306 | 0.367 | 0.76 | 0.62 | -0.93 | 0.62 | 1.73E-07 | HLA-DRB5                                   | downstream     |
| 6 | 32567306 | C | T | rs386699439;rs38669941;rs9270700;rs386699442 | 9.14E-06 | 0.278 | 0.210 | 0.69 | 0.58 | -0.83 | 1.17E-03 | 0.245 | 0.185 | 0.70 | 0.56 | -0.87 | 0.63 | 1.75E-07 | HLA-DRB1(dist=9693), HLA-DQA1(dist=37877)  | intergenic     |
| 6 | 32561794 | C | G | rs9270602                                    | 7.73E-06 | 0.219 | 0.154 | 0.65 | 0.53 | -0.8  | 1.30E-03 | 0.214 | 0.157 | 0.68 | 0.54 | -0.86 | 0.62 | 1.75E-07 | HLA-DRB1(dist=4181), HLA-DQA1(dist=43389)  | intergenic     |
| 6 | 32572806 | G | A | rs9270939                                    | 6.93E-04 | 0.297 | 0.236 | 0.73 | 0.61 | -0.87 | 9.83E-06 | 0.324 | 0.236 | 0.64 | 0.53 | -0.79 | 0.67 | 1.76E-07 | HLA-DRB1(dist=15193), HLA-DQA1(dist=32377) | intergenic     |
| 6 | 32559134 | A | G | rs9270498                                    | 7.04E-04 | 0.303 | 0.244 | 0.74 | 0.62 | -0.89 | 1.13E-05 | 0.326 | 0.240 | 0.65 | 0.53 | -0.8  | 0.66 | 1.76E-07 | HLA-DRB1(dist=1521), HLA-DQA1(dist=46049)  | intergenic     |
| 6 | 32574379 | A | G | rs9270998                                    | 7.18E-04 | 0.298 | 0.236 | 0.73 | 0.61 | -0.87 | 9.44E-06 | 0.325 | 0.236 | 0.64 | 0.53 | -0.79 | 0.67 | 1.76E-07 | HLA-DRB1(dist=16766), HLA-DQA1(dist=30804) | intergenic     |
| 6 | 32472229 | A | G | rs76627799                                   | 4.17E-05 | 0.159 | 0.213 | 0.70 | 0.56 | -0.87 | 2.96E-04 | 0.132 | 0.190 | 0.65 | 0.49 | -0.85 | 0.59 | 1.79E-07 | HLA-DRA(dist=59403), HLA-DRB5(dist=12925)  | intergenic     |
| 6 | 32572695 | G | C | rs9270934                                    | 6.93E-04 | 0.297 | 0.236 | 0.73 | 0.61 | -0.87 | 1.01E-05 | 0.324 | 0.236 | 0.64 | 0.53 | -0.79 | 0.67 | 1.79E-07 | HLA-DRB1(dist=15082), HLA-DQA1(dist=32488) | intergenic     |
| 6 | 32575803 | G | T | rs9271073                                    | 4.29E-04 | 0.297 | 0.230 | 0.72 | 0.6  | -0.86 | 2.02E-05 | 0.325 | 0.239 | 0.65 | 0.54 | -0.8  | 0.67 | 1.79E-07 | HLA-DRB1(dist=18190), HLA-DQA1(dist=32380) | intergenic     |
| 6 | 32513724 | C | T | rs34523106                                   | 7.61E-04 | 0.317 | 0.264 | 0.78 | 0.65 | -0.92 | 1.31E-05 | 0.335 | 0.251 | 0.66 | 0.54 | -0.81 | 0.64 | 1.82E-07 | HLA-DRB5(dist=15718), HLA-DRB6(dist=6766)  | intergenic     |
| 6 | 32589613 | A | G | rs9271514                                    | 5.04E-05 | 0.456 | 0.372 | 0.71 | 0.6  | -0.83 | 2.55E-04 | 0.460 | 0.375 | 0.70 | 0.58 | -0.85 | 0.70 | 1.82E-07 | HLA-DRB1(dist=32000), HLA-DQA1(dist=15570) | intergenic     |
| 6 | 32576595 | G | A | rs9271106                                    | 7.25E-04 | 0.297 | 0.236 | 0.73 | 0.61 | -0.88 | 9.61E-06 | 0.324 | 0.236 | 0.64 | 0.53 | -0.79 | 0.67 | 1.83E-07 | HLA-DRB1(dist=18982), HLA-DQA1(dist=28588) | intergenic     |
| 6 | 32589645 | A | G | rs9271515                                    | 5.17E-05 | 0.457 | 0.373 | 0.71 | 0.6  | -0.83 | 2.51E-04 | 0.460 | 0.375 | 0.70 | 0.58 | -0.85 | 0.70 | 1.84E-07 | HLA-DRB1(dist=32032), HLA-DQA1(dist=15538) | intergenic     |
| 6 | 32626565 | C | T | rs9273371                                    | 2.37E-05 | 0.201 | 0.281 | 0.65 | 0.53 | -0.79 | 5.46E-04 | 0.199 | 0.273 | 0.66 | 0.53 | -0.84 | 0.68 | 1.85E-07 | HLA-DQB1                                   | downstream     |
| 6 | 32542090 | G | T | rs9269455                                    | 1.42E-05 | 0.264 | 0.204 | 0.71 | 0.59 | -0.86 | 8.31E-04 | 0.222 | 0.168 | 0.71 | 0.56 | -0.88 | 0.60 | 1.86E-07 | HLA-DRB6(dist=14311), HLA-DRB1(dist=4457)  | intergenic     |
| 6 | 32579372 | C | T | rs9271223                                    | 5.21E-04 | 0.345 | 0.284 | 0.75 | 0.63 | -0.89 | 1.76E-05 | 0.337 | 0.253 | 0.66 | 0.54 | -0.81 | 0.66 | 1.86E-07 | HLA-DRB1(dist=21759), HLA-DQA1(dist=25811) | intergenic     |
| 6 | 32571690 | C | T | rs9270881                                    | 9.81E-04 | 0.339 | 0.281 | 0.76 | 0.64 | -0.9  | 6.97E-06 | 0.340 | 0.248 | 0.64 | 0.53 | -0.78 | 0.67 | 1.89E-07 | HLA-DRB1(dist=14077), HLA-DQA1(dist=33493) | intergenic     |
| 6 | 32524193 | C | T | rs116811823                                  | 2.07E-06 | 0.312 | 0.388 | 0.71 | 0.6  | -0.85 | 3.75E-03 | 0.368 | 0.421 | 0.80 | 0.66 | -0.97 | 0.64 | 1.91E-07 | HLA-DRB6                                   | ncRNA_intronic |
| 6 | 32576604 | A | T | rs9271107                                    | 7.19E-04 | 0.297 | 0.236 | 0.73 | 0.61 | -0.88 | 1.05E-05 | 0.324 | 0.237 | 0.65 | 0.53 | -0.79 | 0.67 | 1.92E-07 | HLA-DRB1(dist=18991), HLA-DQA1(dist=28579) | intergenic     |
| 6 | 32554760 | A | G | rs9270105                                    | 1.06E-05 | 0.218 | 0.161 | 0.69 | 0.56 | -0.84 | 1.09E-03 | 0.192 | 0.141 | 0.69 | 0.54 | -0.88 | 0.58 | 1.92E-07 | HLA-DRB1                                   | intronic       |
| 6 | 32494206 | A | C | rs113572153                                  | 4.60E-05 | 0.127 | 0.179 | 0.67 | 0.53 | -0.85 | 2.98E-04 | 0.133 | 0.194 | 0.64 | 0.49 | -0.84 | 0.59 | 1.92E-07 | HLA-DRB5                                   | intronic       |
| 6 | 32505875 | C | T | rs72853910                                   | 3.78E-06 | 0.272 | 0.206 | 0.69 | 0.58 | -0.84 | 2.50E-03 | 0.206 | 0.153 | 0.70 | 0.55 | -0.88 | 0.61 | 1.94E-07 | HLA-DRB5(dist=7869), HLA-DRB6(dist=14615)  | intergenic     |
| 6 | 32554487 | T | G | rs9270096                                    | 9.98E-06 | 0.231 | 0.170 | 0.68 | 0.56 | -0.83 | 1.19E-03 | 0.203 | 0.149 | 0.69 | 0.54 | -0.87 | 0.60 | 1.96E-07 | HLA-DRB1                                   | intronic       |
| 6 | 32573058 | C | T | rs9270954                                    | 8.59E-04 | 0.317 | 0.257 | 0.75 | 0.63 | -0.89 | 8.77E-06 | 0.326 | 0.238 | 0.64 | 0.53 | -0.79 | 0.67 | 1.96E-07 | HLA-DRB1(dist=15445), HLA-DQA1(dist=32125) | intergenic     |
| 6 | 32579363 | G | T | rs9271221                                    | 5.19E-04 | 0.345 | 0.284 | 0.75 | 0.63 | -0.89 | 1.90E-05 | 0.337 | 0.253 | 0.67 | 0.55 | -0.81 | 0.66 | 1.97E-07 | HLA-DRB1(dist=21750), HLA-DQA1(dist=25820) | intergenic     |
| 6 | 32521477 | C | T | rs71536527                                   | 2.18E-06 | 0.236 | 0.174 | 0.68 | 0.56 | -0.83 | 3.27E-03 | 0.201 | 0.151 | 0.71 | 0.56 | -0.9  | 0.60 | 1.97E-07 | HLA-DRB6                                   | ncRNA_intronic |
| 6 | 32471266 | A | G | rs115798983                                  | 3.72E-05 | 0.155 | 0.209 | 0.70 | 0.56 | -0.87 | 3.82E-04 | 0.155 | 0.215 | 0.67 | 0.52 | -0.87 | 0.60 | 1.98E-07 | HLA-DRA(dist=58440), HLA-DRB5(dist=13888)  | intergenic     |
| 6 | 32580637 | C | T | rs2395515                                    | 9.82E-06 | 0.226 | 0.159 | 0.65 | 0.53 | -0.79 | 1.31E-03 | 0.215 | 0.157 | 0.68 | 0.54 | -0.86 | 0.63 | 2.01E-07 | HLA-DRB1(dist=23024), HLA-DQA1(dist=24546) | intergenic     |
| 6 | 32521484 | A | C | rs71536528                                   | 2.21E-06 | 0.236 | 0.174 | 0.68 | 0.56 | -0.83 | 3.32E-03 | 0.201 | 0.151 | 0.71 | 0.56 | -0.9  | 0.60 | 2.02E-07 | HLA-DRB6                                   | ncRNA_intronic |
| 6 | 32458003 | C | A | rs77413079                                   | 1.29E-05 | 0.315 | 0.249 | 0.72 | 0.6  | -0.86 | 1.03E-0  |       |       |      |      |       |      |          |                                            |                |

|   |          |   |   |                         |          |       |       |      |      |       |          |       |       |      |      |       |      |          |                                            |                |
|---|----------|---|---|-------------------------|----------|-------|-------|------|------|-------|----------|-------|-------|------|------|-------|------|----------|--------------------------------------------|----------------|
| 6 | 32499145 | C | T | rs79662721              | 5.13E-05 | 0.518 | 0.453 | 0.77 | 0.66 | -0.91 | 3.03E-04 | 0.469 | 0.400 | 0.75 | 0.62 | -0.91 | 0.65 | 2.15E-07 | HLA-DRB5(dist=1139), HLA-DRB6(dist=21345)  | intergenic     |
| 6 | 32507639 | T | G | rs67023073              | 4.23E-05 | 0.331 | 0.272 | 0.75 | 0.63 | -0.9  | 3.64E-04 | 0.319 | 0.248 | 0.71 | 0.58 | -0.87 | 0.63 | 2.16E-07 | HLA-DRB5(dist=9633), HLA-DRB6(dist=12851)  | intergenic     |
| 6 | 32515416 | G | C | rs9269914               | 4.06E-04 | 0.303 | 0.248 | 0.76 | 0.63 | -0.91 | 2.86E-05 | 0.296 | 0.223 | 0.69 | 0.56 | -0.84 | 0.63 | 2.16E-07 | HLA-DRB1                                   | intronic       |
| 6 | 32574990 | T | C | rs9271025               | 1.06E-05 | 0.243 | 0.177 | 0.67 | 0.55 | -0.81 | 1.31E-03 | 0.216 | 0.159 | 0.68 | 0.54 | -0.86 | 0.63 | 2.17E-07 | HLA-DRB1(dist=17377), HLA-DQA1(dist=30193) | intergenic     |
| 6 | 32503033 | C | G | rs71549269              | 4.29E-06 | 0.275 | 0.208 | 0.69 | 0.58 | -0.84 | 2.59E-03 | 0.216 | 0.163 | 0.71 | 0.56 | -0.89 | 0.62 | 2.18E-07 | HLA-DRB5(dist=5027), HLA-DRB6(dist=17457)  | intergenic     |
| 6 | 32459383 | G | A | rs75885006              | 1.49E-05 | 0.309 | 0.377 | 0.74 | 0.62 | -0.88 | 9.49E-04 | 0.378 | 0.444 | 0.76 | 0.63 | -0.92 | 0.65 | 2.20E-07 | HLA-DRA(dist=46557), HLA-DRB5(dist=25771)  | intergenic     |
| 6 | 32524201 | G | A | rs190347943             | 5.10E-06 | 0.354 | 0.428 | 0.73 | 0.62 | -0.87 | 2.35E-03 | 0.412 | 0.470 | 0.79 | 0.65 | -0.95 | 0.65 | 2.20E-07 | HLA-DRB6                                   | ncRNA_intronic |
| 6 | 32515396 | C | T | rs9269912               | 5.81E-04 | 0.304 | 0.251 | 0.77 | 0.64 | -0.92 | 1.84E-05 | 0.295 | 0.221 | 0.68 | 0.55 | -0.83 | 0.63 | 2.21E-07 | HLA-DRB1                                   | intronic       |
| 6 | 32565413 | G | C | rs9270624               | 9.78E-04 | 0.301 | 0.242 | 0.74 | 0.62 | -0.89 | 8.42E-06 | 0.330 | 0.241 | 0.65 | 0.53 | -0.79 | 0.67 | 2.21E-07 | HLA-DRB1(dist=7800), HLA-DQA1(dist=39770)  | intergenic     |
| 6 | 32480057 | G | C | rs201234464;rs112424196 | 3.64E-05 | 0.311 | 0.248 | 0.73 | 0.61 | -0.88 | 4.35E-04 | 0.284 | 0.219 | 0.71 | 0.57 | -0.87 | 0.63 | 2.23E-07 | HLA-DRA(dist=67231), HLA-DRB5(dist=5097)   | intergenic     |
| 6 | 32525913 | T | C | rs146123957             | 2.66E-04 | 0.441 | 0.378 | 0.77 | 0.66 | -0.91 | 5.63E-05 | 0.384 | 0.302 | 0.69 | 0.57 | -0.84 | 0.66 | 2.23E-07 | HLA-DRB6                                   | ncRNA_exonic   |
| 6 | 32588446 | C | T | rs9271457               | 6.49E-05 | 0.461 | 0.381 | 0.72 | 0.61 | -0.85 | 2.51E-04 | 0.461 | 0.376 | 0.70 | 0.58 | -0.85 | 0.70 | 2.24E-07 | HLA-DRB1(dist=30833), HLA-DQA1(dist=16737) | intergenic     |
| 6 | 32574624 | A | G | rs9271007               | 1.02E-03 | 0.308 | 0.248 | 0.74 | 0.62 | -0.89 | 7.94E-06 | 0.327 | 0.237 | 0.64 | 0.53 | -0.78 | 0.67 | 2.26E-07 | HLA-DRB1(dist=17011), HLA-DQA1(dist=30559) | intergenic     |
| 6 | 32456198 | T | C | rs78819855              | 3.34E-06 | 0.372 | 0.445 | 0.74 | 0.62 | -0.87 | 3.11E-03 | 0.553 | 0.490 | 0.78 | 0.64 | -0.94 | 0.65 | 2.26E-07 | HLA-DRA(dist=43372), HLA-DRB5(dist=28956)  | intergenic     |
| 6 | 32574628 | G | A | rs9271008               | 1.02E-03 | 0.308 | 0.248 | 0.74 | 0.62 | -0.89 | 7.96E-06 | 0.327 | 0.237 | 0.64 | 0.53 | -0.78 | 0.67 | 2.26E-07 | HLA-DRB1(dist=17015), HLA-DQA1(dist=30555) | intergenic     |
| 6 | 32460232 | A | G | rs77850263              | 4.60E-05 | 0.176 | 0.237 | 0.69 | 0.56 | -0.85 | 3.58E-04 | 0.178 | 0.248 | 0.65 | 0.51 | -0.83 | 0.64 | 2.27E-07 | HLA-DRA(dist=47406), HLA-DRB5(dist=24922)  | intergenic     |
| 6 | 32455569 | C | T | rs79197920              | 2.38E-06 | 0.370 | 0.443 | 0.74 | 0.62 | -0.87 | 4.20E-03 | 0.541 | 0.482 | 0.79 | 0.66 | -0.95 | 0.65 | 2.27E-07 | HLA-DRA(dist=42743), HLA-DRB5(dist=29858)  | intergenic     |
| 6 | 32496276 | G | A | rs116475394             | 7.81E-06 | 0.313 | 0.246 | 0.72 | 0.6  | -0.86 | 1.69E-03 | 0.248 | 0.193 | 0.72 | 0.58 | -0.9  | 0.62 | 2.27E-07 | HLA-DRB5                                   | intronic       |
| 6 | 32507200 | T | C | rs115562562             | 6.43E-06 | 0.345 | 0.278 | 0.73 | 0.61 | -0.87 | 2.13E-03 | 0.247 | 0.192 | 0.73 | 0.58 | -0.9  | 0.63 | 2.28E-07 | HLA-DRB5(dist=9194), HLA-DRB6(dist=13290)  | intergenic     |
| 6 | 32577002 | A | T | rs9271135               | 4.39E-04 | 0.379 | 0.318 | 0.76 | 0.64 | -0.9  | 2.86E-05 | 0.363 | 0.281 | 0.68 | 0.56 | -0.83 | 0.67 | 2.28E-07 | HLA-DRB1(dist=19389), HLA-DQA1(dist=28181) | intergenic     |
| 6 | 32486652 | C | T | rs114208862             | 4.77E-06 | 0.295 | 0.228 | 0.70 | 0.59 | -0.84 | 2.61E-03 | 0.215 | 0.162 | 0.71 | 0.56 | -0.89 | 0.62 | 2.30E-07 | HLA-DRB5                                   | intronic       |
| 6 | 32525903 | T | C | rs181664429             | 3.51E-04 | 0.455 | 0.393 | 0.78 | 0.66 | -0.92 | 4.30E-05 | 0.400 | 0.315 | 0.69 | 0.57 | -0.84 | 0.66 | 2.30E-07 | HLA-DRB6                                   | ncRNA_exonic   |
| 6 | 32505767 | G | A | rs28568890              | 2.23E-06 | 0.249 | 0.184 | 0.68 | 0.56 | -0.83 | 4.47E-03 | 0.187 | 0.141 | 0.71 | 0.56 | -0.91 | 0.60 | 2.33E-07 | HLA-DRB5(dist=7761), HLA-DRB6(dist=14723)  | intergenic     |
| 6 | 32513415 | C | T | rs67020511              | 1.17E-07 | 0.288 | 0.218 | 0.69 | 0.57 | -0.83 | 1.77E-02 | 0.251 | 0.209 | 0.78 | 0.63 | -0.97 | 0.61 | 2.33E-07 | HLA-DRB5(dist=15409), HLA-DRB6(dist=7075)  | intergenic     |
| 6 | 32574863 | G | A | rs9271021               | 1.12E-03 | 0.315 | 0.256 | 0.75 | 0.63 | -0.89 | 7.57E-06 | 0.331 | 0.242 | 0.64 | 0.53 | -0.79 | 0.67 | 2.34E-07 | HLA-DRB1(dist=17250), HLA-DQA1(dist=30320) | intergenic     |
| 6 | 32482525 | A | G | rs115284487             | 7.44E-06 | 0.326 | 0.399 | 0.73 | 0.61 | -0.86 | 1.77E-03 | 0.341 | 0.409 | 0.75 | 0.62 | -0.91 | 0.66 | 2.34E-07 | HLA-DRA(dist=69699), HLA-DRB5(dist=2629)   | intergenic     |
| 6 | 32511602 | A | G | rs622405593             | 4.22E-06 | 0.229 | 0.170 | 0.69 | 0.57 | -0.84 | 2.35E-03 | 0.196 | 0.145 | 0.69 | 0.55 | -0.88 | 0.60 | 2.34E-07 | HLA-DRB5(dist=13596), HLA-DRB6(dist=8888)  | intergenic     |
| 6 | 32458023 | A | C | rs140350368             | 1.72E-06 | 0.315 | 0.243 | 0.70 | 0.58 | -0.83 | 5.49E-03 | 0.247 | 0.199 | 0.76 | 0.61 | -0.95 | 0.63 | 2.35E-07 | HLA-DRA(dist=45197), HLA-DRB5(dist=27131)  | intergenic     |
| 6 | 32571801 | A | G | rs200874665;rs4478449   | 1.30E-05 | 0.249 | 0.183 | 0.67 | 0.55 | -0.81 | 1.23E-03 | 0.216 | 0.158 | 0.68 | 0.54 | -0.86 | 0.63 | 2.35E-07 | HLA-DRB1(dist=14188), HLA-DQA1(dist=33382) | intergenic     |
| 6 | 32540897 | A | T | rs9269376               | 1.21E-03 | 0.377 | 0.320 | 0.78 | 0.66 | -0.92 | 6.96E-06 | 0.368 | 0.280 | 0.67 | 0.55 | -0.81 | 0.66 | 2.36E-07 | HLA-DRB6(dist=13118), HLA-DRB1(dist=5650)  | intergenic     |
| 6 | 32554867 | C | A | rs9270111               | 2.23E-05 | 0.223 | 0.167 | 0.70 | 0.57 | -0.85 | 7.29E-04 | 0.199 | 0.145 | 0.68 | 0.54 | -0.87 | 0.59 | 2.37E-07 | HLA-DRB1                                   | intronic       |
| 6 | 32568316 | A | G | rs9270749               | 1.00E-03 | 0.365 | 0.307 | 0.77 | 0.65 | -0.92 | 1.02E-05 | 0.355 | 0.267 | 0.66 | 0.54 | -0.81 | 0.66 | 2.38E-07 | HLA-DRB1(dist=10703), HLA-DQA1(dist=36867) | intergenic     |
| 6 | 32482261 | T | C | rs113506020             | 4.92E-05 | 0.242 | 0.299 | 0.75 | 0.62 | -0.9  | 3.54E-04 | 0.222 | 0.286 | 0.71 | 0.57 | -0.89 | 0.62 | 2.39E-07 | HLA-DRA(dist=69435), HLA-DRB5(dist=2893)   | intergenic     |
| 6 | 32559541 | T | A | rs9270522               | 1.28E-03 | 0.297 | 0.242 | 0.75 | 0.63 | -0.9  | 7.29E-06 | 0.324 | 0.237 | 0.65 | 0.53 | -0.79 | 0.66 | 2.44E-07 | HLA-DRB1(dist=1928), HLA-DQA1(dist=45642)  | intergenic     |
| 6 | 32552527 | A | T | rs9269984               | 1.28E-05 | 0.284 | 0.219 | 0.71 | 0.59 | -0.85 | 1.29E-03 | 0.215 | 0.159 | 0.69 | 0.55 | -0.87 | 0.62 | 2.46E-07 | HLA-DRB1                                   | intronic       |
| 6 | 32576347 | G | C | rs9271094               | 9.78E-04 | 0.295 | 0.235 | 0.73 | 0.61 | -0.88 | 9.51E-06 | 0.325 | 0.236 | 0.64 | 0.53 | -0.79 | 0.67 | 2.49E-07 | HLA-DRB1(dist=18734), HLA-DQA1(dist=28836) | intergenic     |
| 6 | 32486639 | T | A | rs116577630             | 3.37E-06 | 0.295 | 0.227 | 0.70 | 0.58 | -0.84 | 3.60E-03 | 0.216 | 0.165 | 0.72 | 0.57 | -0.9  | 0.62 | 2.49E-07 | HLA-DRB5                                   | intronic       |
| 6 | 32567488 | A | T | rs9270714               | 1.17E-03 | 0.303 | 0.245 | 0.75 | 0.62 | -0.89 | 7.63E-06 | 0.328 | 0.239 | 0.64 | 0.53 | -0.79 | 0.67 | 2.50E-07 | HLA-DRB1(dist=9875), HLA-DQA1(dist=37695)  | intergenic     |
| 6 | 32518584 | A | T | rs28524681              | 2.78E-06 | 0.238 | 0.176 | 0.68 | 0.56 | -0.83 | 3.62E-03 | 0.196 | 0.147 | 0.71 | 0.56 | -0.9  | 0.60 | 2.51E-07 | HLA-DRB5(dist=20578), HLA-DRB6(dist=1906)  | intergenic     |
| 6 | 32505781 | G | A | rs76567100              | 5.60E-06 | 0.249 | 0.187 | 0.69 | 0.57 | -0.84 | 2.24E-03 | 0.206 | 0.154 | 0.70 | 0.55 | -0.88 | 0.61 | 2.52E-07 | HLA-DRB5(dist=7775), HLA-DRB6(dist=14709)  | intergenic     |
| 6 | 32571659 | G | T | rs9270880               | 1.62E-05 | 0.266 | 0.199 | 0.69 | 0.57 | -0.83 | 1.07E-03 | 0.226 | 0.166 | 0.68 | 0.54 | -0.85 | 0.64 | 2.52E-07 | HLA-DRB1(dist=14046), HLA-DQA1(dist=33524) | intergenic     |
| 6 | 32459326 | C | T | rs116837861             | 2.71E-05 | 0.169 | 0.229 | 0.68 | 0.55 | -0.84 | 6.91E-04 | 0.170 | 0.230 | 0.68 | 0.53 | -0.87 | 0.62 | 2.53E-07 | HLA-DRA(dist=46500), HLA-DRB5(dist=25828)  | intergenic     |
| 6 | 32495937 | G | A | rs114446916             | 4.21E-06 | 0.350 | 0.279 | 0.72 | 0.61 | -0.86 | 2.97E-03 | 0.275 | 0.223 | 0.73 | 0.61 | -0.94 | 0.63 | 2.53E-07 | HLA-DRB5                                   | intronic       |
| 6 | 32508559 | T | C | rs62405590              | 8.78E-06 | 0.251 | 0.190 | 0.70 | 0.58 | -0.85 | 1.70E-03 | 0.201 | 0.147 | 0.69 | 0.54 | -0.87 | 0.61 | 2.55E-07 | HLA-DRB5(dist=10553), HLA-DRB6(dist=11931) | intergenic     |
| 6 | 32525235 | T | C | rs28645249              | 7.44E-06 | 0.280 | 0.215 | 0.71 | 0.59 | -0.85 | 1.96E-03 | 0.218 | 0.163 | 0.70 | 0.56 | -0.88 | 0.62 | 2.55E-07 | HLA-DRB6                                   | ncRNA_intronic |
| 6 | 32524171 | A | G | rs111789491             | 9.60E-06 | 0.156 | 0.218 | 0.66 | 0.53 | -0.82 | 1.80E-03 | 0.174 | 0.228 | 0.71 | 0.56 | -0.91 | 0.62 | 2.56E-07 | HLA-DRB6                                   | ncRNA_intronic |
| 6 | 32458441 | C | T | rs77658501              | 2.00E-05 | 0.144 | 0.206 | 0.65 | 0.52 | -0.82 | 9.55E-04 | 0.130 | 0.186 | 0.66 | 0.5  | -0.86 | 0.61 | 2.56E-07 | HLA-DRA(dist=45615), HLA-DRB5(dist=26713)  | intergenic     |
| 6 | 32455305 | A | G | rs188625706             | 4.57E-06 | 0.350 | 0.422 | 0.74 | 0.62 | -0.87 | 2.86E-03 | 0.364 | 0.426 | 0.77 | 0.64 | -0.94 | 0.65 | 2.58E-07 | HLA-DRA(dist=42479), HLA-DRB5(dist=29849)  | intergenic     |
| 6 | 32575619 | C | G | rs9271065               | 1.20E-06 | 0.206 | 0.136 | 0.61 | 0.49 | -0.75 | 7.77E-03 | 0.186 | 0.141 | 0.72 | 0.56 | -0.92 | 0.61 | 2.58E-07 | HLA-DRB1(dist=18006), HLA-DQA1(dist=29564) | intergenic     |
| 6 | 32523008 | C | T | rs35058673              | 2.67E-06 | 0.227 | 0.167 | 0.68 | 0.56 | -0.83 | 3.75E-03 | 0.181 | 0.135 | 0.70 | 0.55 | -0.9  | 0.59 | 2.58E-07 | HLA-DRB6                                   | ncRNA_intronic |
| 6 | 32454667 | T | C | rs9269268               | 7.85E-06 | 0.248 | 0.182 | 0.68 | 0.56 | -0.82 | 2.01E-03 | 0.210 | 0.159 | 0.71 | 0.56 | -0.89 | 0.62 | 2.59E-07 | HLA-DRA(dist=41841), HLA-DRB5(dist=30487)  | intergenic     |
| 6 | 32524684 | A | C | rs67353091              | 4.35E-06 | 0.250 | 0.187 | 0.69 | 0.57 | -0.84 | 2.76E-03 | 0.209 | 0.160 | 0.72 | 0.57 | -0.91 | 0.60 | 2.59E-07 | HLA-DRB6                                   | ncRNA_intronic |
| 6 | 32540331 | G | A | rs9269339               | 1.33E-03 | 0.354 | 0.297 | 0.77 | 0.65 | -0.91 | 7.47E-06 | 0.340 | 0.252 | 0.65 | 0.53 | -0.8  | 0.67 | 2.59E-07 | HLA-DRB6(dist=12552), HLA-DRB1(dist=6216)  | intergenic     |
| 6 | 32569164 | C | T | rs9270786               | 1.37E-03 | 0.363 | 0.309 | 0.79 | 0.66 | -0.93 | 7.46E-06 | 0.366 | 0.279 | 0.67 | 0.55 | -0.81 | 0.66 | 2.59E-07 | HLA-DRB1(dist=11551), HLA-DQA1(dist=36019) | intergenic     |
| 6 | 32509179 | T | C | rs66713918              | 4.23E-06 | 0.238 | 0.178 | 0.69 | 0.57 | -0.84 | 2.76E-03 | 0.200 | 0.150 | 0.70 | 0.56 | -0.89 | 0.60 | 2.59E-07 | HLA-DRB5(dist=11173), HLA-DRB6(dist=11311) | intergenic     |
| 6 | 32576764 | T | G | rs9271116               | 1.26E-05 | 0.241 | 0.175 | 0.67 | 0.55 | -0.81 |          |       |       |      |      |       |      |          |                                            |                |

|   |          |   |   |                         |          |       |       |      |      |       |            |       |       |      |      |       |      |          |                                            |                |
|---|----------|---|---|-------------------------|----------|-------|-------|------|------|-------|------------|-------|-------|------|------|-------|------|----------|--------------------------------------------|----------------|
| 6 | 32513531 | T | G | rs34442507              | 3.04E-06 | 0.224 | 0.165 | 0.69 | 0.56 | -0.84 | 3.52E-03   | 0.181 | 0.134 | 0.70 | 0.55 | -0.89 | 0.59 | 2.76E-07 | HLA-DRB5(dist=15525), HLA-DRB6(dist=6959)  | intergenic     |
| 6 | 32561743 | G | C | rs9270601               | 1.13E-05 | 0.231 | 0.165 | 0.66 | 0.54 | -0.8  | 1.60E-03   | 0.215 | 0.159 | 0.69 | 0.55 | -0.87 | 0.63 | 2.77E-07 | HLA-DRB1(dist=4130), HLA-DQA1(dist=43440)  | intergenic     |
| 6 | 32608931 | T | C | rs9272679               | 2.03E-03 | 0.403 | 0.462 | 0.79 | 0.67 | -0.93 | 3.78E-06   | 0.382 | 0.490 | 0.64 | 0.53 | -0.78 | 0.70 | 2.77E-07 | HLA-DQA1                                   | intronic       |
| 6 | 32641484 | C | T | rs9274928               | 5.21E-04 | 0.144 | 0.196 | 0.69 | 0.55 | -0.87 | 3.10E-05   | 0.131 | 0.207 | 0.58 | 0.44 | -0.76 | 0.63 | 2.79E-07 | HLA-DQB1(dist=7018), HLA-DQA2(dist=67679)  | intergenic     |
| 6 | 32512180 | A | T | rs28467173              | 5.71E-06 | 0.234 | 0.176 | 0.70 | 0.57 | -0.85 | 2.26E-03   | 0.198 | 0.147 | 0.70 | 0.55 | -0.88 | 0.60 | 2.79E-07 | HLA-DRB5(dist=14174), HLA-DRB6(dist=8310)  | intergenic     |
| 6 | 32551126 | A | C | rs9269898               | 1.74E-05 | 0.234 | 0.229 | 0.72 | 0.6  | -0.87 | 1.12E-03   | 0.230 | 0.174 | 0.71 | 0.56 | -0.88 | 0.62 | 2.81E-07 | HLA-DRB1                                   | intronic       |
| 2 | 45120438 | C | T | rs114206241             | 1.11E-02 | 0.073 | 0.054 | 1.38 | 1    | -1.91 | 2.74E-07   | 0.097 | 0.046 | 2.20 | 1.59 | -3.05 | 2.21 | 2.81E-07 | CAMKMT(dist=120707), SIX3-AS1(dist=46855)  | intergenic     |
| 6 | 32540777 | G | T | rs9269369               | 1.19E-03 | 0.379 | 0.322 | 0.78 | 0.66 | -0.92 | 9.41E-06   | 0.353 | 0.266 | 0.67 | 0.55 | -0.81 | 0.66 | 2.81E-07 | HLA-DRB6(dist=12998), HLA-DRB1(dist=5770)  | intergenic     |
| 6 | 32579354 | C | T | rs9271219               | 6.53E-04 | 0.356 | 0.296 | 0.76 | 0.64 | -0.9  | 2.33E-05   | 0.350 | 0.265 | 0.67 | 0.55 | -0.81 | 0.67 | 2.81E-07 | HLA-DRB1(dist=21741), HLA-DQA1(dist=25829) | intergenic     |
| 6 | 32505869 | A | C | rs59894631              | 4.26E-06 | 0.275 | 0.210 | 0.70 | 0.58 | -0.84 | 3.49E-03   | 0.194 | 0.147 | 0.71 | 0.56 | -0.9  | 0.61 | 2.83E-07 | HLA-DRB5(dist=7863), HLA-DRB6(dist=14621)  | intergenic     |
| 6 | 32559468 | T | C | rs9270516               | 2.44E-03 | 0.324 | 0.272 | 0.78 | 0.65 | -0.93 | 3.18E-06   | 0.341 | 0.249 | 0.64 | 0.53 | -0.78 | 0.66 | 2.83E-07 | HLA-DRB1(dist=1855), HLA-DQA1(dist=45715)  | intergenic     |
| 6 | 32460019 | G | A | rs148630431             | 3.39E-05 | 0.170 | 0.232 | 0.68 | 0.55 | -0.84 | 6.31E-04   | 0.176 | 0.243 | 0.66 | 0.52 | -0.85 | 0.64 | 2.85E-07 | HLA-DRA(dist=47193), HLA-DRB5(dist=25135)  | intergenic     |
| 6 | 32575575 | T | A | rs9271062               | 1.54E-05 | 0.229 | 0.162 | 0.65 | 0.53 | -0.8  | 1.30E-03   | 0.215 | 0.158 | 0.68 | 0.54 | -0.86 | 0.63 | 2.87E-07 | HLA-DRB1(dist=17962), HLA-DQA1(dist=29608) | intergenic     |
| 6 | 32507168 | T | C | rs115466102             | 3.18E-05 | 0.150 | 0.209 | 0.67 | 0.53 | -0.83 | 6.65E-04   | 0.148 | 0.213 | 0.64 | 0.49 | -0.83 | 0.63 | 2.87E-07 | HLA-DRB5(dist=9162), HLA-DRB6(dist=13322)  | intergenic     |
| 6 | 32479232 | G | C | rs114227752             | 1.93E-05 | 0.323 | 0.258 | 0.73 | 0.61 | -0.87 | 1.07E-03   | 0.270 | 0.213 | 0.73 | 0.59 | -0.9  | 0.62 | 2.88E-07 | HLA-DRA(dist=66406), HLA-DRB5(dist=5922)   | intergenic     |
| 6 | 32552226 | G | C | rs144353907             | 1.93E-05 | 0.116 | 0.170 | 0.64 | 0.5  | -0.82 | 1.10E-03   | 0.103 | 0.157 | 0.61 | 0.45 | -0.83 | 0.59 | 2.89E-07 | HLA-DRB1                                   | intronic       |
| 6 | 32508922 | T | C | rs67947168              | 6.40E-06 | 0.231 | 0.172 | 0.69 | 0.57 | -0.84 | 2.27E-03   | 0.196 | 0.145 | 0.70 | 0.55 | -0.88 | 0.60 | 2.89E-07 | HLA-DRB5(dist=10916), HLA-DRB6(dist=11568) | intergenic     |
| 6 | 32577282 | A | C | rs9271146               | 4.30E-04 | 0.288 | 0.225 | 0.72 | 0.6  | -0.86 | 3.72E-05   | 0.316 | 0.234 | 0.66 | 0.54 | -0.81 | 0.67 | 2.89E-07 | HLA-DRB1(dist=19669), HLA-DQA1(dist=27901) | intergenic     |
| 6 | 32574374 | G | A | rs9270997               | 1.61E-05 | 0.229 | 0.162 | 0.65 | 0.53 | -0.8  | 1.26E-03   | 0.215 | 0.158 | 0.68 | 0.54 | -0.86 | 0.63 | 2.89E-07 | HLA-DRB1(dist=16761), HLA-DQA1(dist=30809) | intergenic     |
| 6 | 32523401 | C | A | rs72492333              | 5.72E-06 | 0.238 | 0.179 | 0.70 | 0.57 | -0.85 | 2.45E-03   | 0.199 | 0.147 | 0.70 | 0.55 | -0.88 | 0.60 | 2.90E-07 | HLA-DRB6                                   | ncRNA_intronic |
| 6 | 32554517 | T | A | rs9270098               | 7.99E-04 | 0.286 | 0.234 | 0.76 | 0.63 | -0.91 | 1.87E-05   | 0.287 | 0.214 | 0.67 | 0.55 | -0.83 | 0.63 | 2.90E-07 | HLA-DRB1                                   | intronic       |
| 6 | 32509188 | A | T | rs67111333              | 6.89E-06 | 0.232 | 0.173 | 0.69 | 0.57 | -0.84 | 2.16E-03   | 0.197 | 0.145 | 0.70 | 0.55 | -0.88 | 0.60 | 2.90E-07 | HLA-DRB5(dist=11182), HLA-DRB6(dist=11302) | intergenic     |
| 6 | 32459312 | T | C | rs113541465             | 8.91E-06 | 0.154 | 0.219 | 0.65 | 0.52 | -0.81 | 2.12E-03   | 0.185 | 0.243 | 0.71 | 0.56 | -0.9  | 0.63 | 2.91E-07 | HLA-DRA(dist=46486), HLA-DRB5(dist=25842)  | intergenic     |
| 6 | 32520583 | A | G | rs71536522              | 3.74E-06 | 0.232 | 0.171 | 0.69 | 0.56 | -0.84 | 3.26E-03   | 0.196 | 0.146 | 0.70 | 0.55 | -0.89 | 0.60 | 2.92E-07 | HLA-DRB6                                   | ncRNA_exonic   |
| 6 | 32470279 | G | A | rs149675244             | 1.49E-05 | 0.228 | 0.293 | 0.71 | 0.59 | -0.87 | 1.40E-03   | 0.239 | 0.303 | 0.72 | 0.58 | -0.9  | 0.64 | 2.93E-07 | HLA-DRA(dist=57453), HLA-DRB5(dist=14875)  | intergenic     |
| 6 | 32552237 | A | G | rs9269666               | 1.38E-05 | 0.260 | 0.198 | 0.70 | 0.58 | -0.85 | 1.40E-03   | 0.210 | 0.155 | 0.69 | 0.55 | -0.87 | 0.62 | 2.94E-07 | HLA-DRB1                                   | intronic       |
| 6 | 32572851 | G | A | rs9270941               | 1.11E-03 | 0.307 | 0.244 | 0.74 | 0.62 | -0.89 | 1.01E-05   | 0.329 | 0.241 | 0.65 | 0.53 | -0.79 | 0.67 | 2.96E-07 | HLA-DRB1(dist=15238), HLA-DQA1(dist=32332) | intergenic     |
| 6 | 32481498 | G | C | rs72508422              | 5.18E-06 | 0.394 | 0.327 | 0.74 | 0.63 | -0.88 | 2.99E-03   | 0.313 | 0.259 | 0.77 | 0.63 | -0.94 | 0.63 | 2.97E-07 | HLA-DRA(dist=68672), HLA-DRB5(dist=3656)   | intergenic     |
| 6 | 32647150 | T | C | rs28755365              | 7.43E-04 | 0.209 | 0.266 | 0.73 | 0.6  | -0.89 | 1.96E-05   | 0.175 | 0.259 | 0.61 | 0.48 | -0.78 | 0.66 | 2.98E-07 | HLA-DQB1(dist=12684), HLA-DQA2(dist=62013) | intergenic     |
| 6 | 32559472 | T | C | rs9270517               | 2.46E-03 | 0.323 | 0.271 | 0.78 | 0.65 | -0.93 | 3.41E-06   | 0.340 | 0.249 | 0.64 | 0.53 | -0.78 | 0.67 | 2.99E-07 | HLA-DRB1(dist=1859), HLA-DQA1(dist=45711)  | intergenic     |
| 6 | 32502507 | A | G | rs77707360              | 6.77E-06 | 0.256 | 0.195 | 0.70 | 0.58 | -0.85 | 2.29E-03   | 0.203 | 0.151 | 0.70 | 0.55 | -0.88 | 0.61 | 3.00E-07 | HLA-DRB5(dist=4501), HLA-DRB6(dist=17983)  | intergenic     |
| 6 | 32482976 | G | T | rs188545851             | 1.44E-05 | 0.181 | 0.243 | 0.69 | 0.56 | -0.85 | 1.42E-03   | 0.170 | 0.230 | 0.69 | 0.54 | -0.88 | 0.63 | 3.00E-07 | HLA-DRA(dist=70150), HLA-DRB5(dist=2178)   | intergenic     |
| 6 | 32574649 | C | A | rs9271009               | 1.72E-03 | 0.313 | 0.255 | 0.75 | 0.63 | -0.9  | 8.49E-06   | 0.326 | 0.238 | 0.64 | 0.53 | -0.79 | 0.67 | 3.01E-07 | HLA-DRB1(dist=17036), HLA-DQA1(dist=30534) | intergenic     |
| 6 | 32507091 | G | T | rs78668102              | 4.30E-05 | 0.153 | 0.212 | 0.68 | 0.54 | -0.84 | 5.29E-04   | 0.149 | 0.215 | 0.64 | 0.49 | -0.83 | 0.63 | 3.02E-07 | HLA-DRB5(dist=9085), HLA-DRB6(dist=13399)  | intergenic     |
| 6 | 32520566 | G | G | rs116020203             | 6.56E-06 | 0.241 | 0.181 | 0.70 | 0.57 | -0.85 | 2.30E-03   | 0.212 | 0.160 | 0.71 | 0.56 | -0.89 | 0.60 | 3.03E-07 | HLA-DRB6                                   | ncRNA_exonic   |
| 6 | 32514384 | T | C | rs68124732              | 5.02E-06 | 0.254 | 0.192 | 0.69 | 0.57 | -0.84 | 2.98E-03   | 0.203 | 0.153 | 0.71 | 0.56 | -0.89 | 0.61 | 3.04E-07 | HLA-DRB5(dist=16378), HLA-DRB6(dist=6106)  | intergenic     |
| 6 | 32514561 | G | C | rs62405632              | 1.64E-03 | 0.359 | 0.309 | 0.80 | 0.67 | -0.95 | 8.37E-06   | 0.374 | 0.283 | 0.66 | 0.55 | -0.8  | 0.66 | 3.05E-07 | HLA-DRB5(dist=16555), HLA-DRB6(dist=5929)  | intergenic     |
| 6 | 32523980 | T | A | rs150058067             | 3.09E-05 | 0.134 | 0.190 | 0.66 | 0.52 | -0.84 | 7.51E-04   | 0.126 | 0.180 | 0.66 | 0.5  | -0.87 | 0.60 | 3.06E-07 | HLA-DRB6                                   | ncRNA_intronic |
| 6 | 32579870 | A | C | rs9271241               | 1.12E-03 | 0.305 | 0.246 | 0.74 | 0.62 | -0.89 | 1.09E-05   | 0.331 | 0.243 | 0.65 | 0.53 | -0.79 | 0.67 | 3.09E-07 | HLA-DRB1(dist=22257), HLA-DQA1(dist=25313) | intergenic     |
| 6 | 32537139 | A | C | rs114553448;rs200931912 | 8.78E-04 | 0.376 | 0.318 | 0.77 | 0.65 | -0.92 | 1.68E-05   | 0.347 | 0.264 | 0.67 | 0.55 | -0.82 | 0.66 | 3.10E-07 | HLA-DRB6(dist=9360), HLA-DRB1(dist=9408)   | intergenic     |
| 6 | 32502617 | A | G | rs72508463              | 8.06E-06 | 0.234 | 0.176 | 0.70 | 0.58 | -0.86 | 1.91E-03   | 0.198 | 0.146 | 0.69 | 0.55 | -0.88 | 0.60 | 3.10E-07 | HLA-DRB5(dist=4611), HLA-DRB6(dist=17873)  | intergenic     |
| 6 | 32574602 | T | C | rs9271006               | 1.36E-03 | 0.305 | 0.247 | 0.75 | 0.62 | -0.89 | 7.96E-06   | 0.326 | 0.237 | 0.64 | 0.53 | -0.78 | 0.67 | 3.12E-07 | HLA-DRB1(dist=16989), HLA-DQA1(dist=30581) | intergenic     |
| 6 | 32479924 | C | T | rs72849291              | 1.36E-05 | 0.270 | 0.208 | 0.71 | 0.59 | -0.86 | 1.52E-03   | 0.211 | 0.158 | 0.70 | 0.56 | -0.88 | 0.61 | 3.14E-07 | HLA-DRA(dist=67098), HLA-DRB5(dist=5230)   | intergenic     |
| 6 | 32556030 | C | T | rs9270189               | 5.38E-06 | 0.203 | 0.145 | 0.67 | 0.54 | -0.83 | 2.89E-03   | 0.177 | 0.132 | 0.70 | 0.55 | -0.9  | 0.58 | 3.15E-07 | HLA-DRB1                                   | intronic       |
| 6 | 32520615 | C | T | rs66712869              | 4.26E-06 | 0.232 | 0.172 | 0.69 | 0.56 | -0.84 | 3.21E-03   | 0.196 | 0.146 | 0.70 | 0.55 | -0.89 | 0.60 | 3.17E-07 | HLA-DRB6                                   | ncRNA_exonic   |
| 6 | 32485492 | C | T | rs75563047              | 4.15E-06 | 0.410 | 0.337 | 0.73 | 0.62 | -0.86 | 4.26E-03   | 0.321 | 0.267 | 0.77 | 0.63 | -0.94 | 0.64 | 3.18E-07 | HLA-DRB5(NM_002125:c.*24G>A)               | UTR3           |
| 6 | 32540784 | C | T | rs9269370               | 1.50E-03 | 0.380 | 0.324 | 0.78 | 0.66 | -0.93 | 8.09E-06   | 0.357 | 0.270 | 0.67 | 0.55 | -0.81 | 0.66 | 3.20E-07 | HLA-DRB6(dist=13005), HLA-DRB1(dist=5763)  | intergenic     |
| 6 | 32509550 | T | C | rs113260943             | 1.48E-03 | 0.322 | 0.271 | 0.78 | 0.66 | -0.94 | 1.00E-05   | 0.324 | 0.243 | 0.67 | 0.55 | -0.82 | 0.64 | 3.21E-07 | HLA-DRB5(dist=11544), HLA-DRB6(dist=10940) | intergenic     |
| 6 | 32552223 | T | A | rs149614319             | 2.00E-05 | 0.116 | 0.170 | 0.64 | 0.5  | -0.82 | 1.20E-03   | 0.103 | 0.157 | 0.62 | 0.46 | -0.84 | 0.59 | 3.22E-07 | HLA-DRB1                                   | intronic       |
| 6 | 32456187 | T | A | rs76032688              | 1.66E-07 | 0.412 | 0.501 | 0.70 | 0.59 | -0.82 | 3.03E-02   | 0.458 | 0.414 | 0.84 | 0.69 | -1.01 | 0.66 | 3.23E-07 | HLA-DRA(dist=43361), HLA-DRB5(dist=28967)  | intergenic     |
| 6 | 32511698 | A | G | rs6655992               | 4.77E-06 | 0.229 | 0.171 | 0.69 | 0.57 | -0.84 | 2.89E-03   | 0.196 | 0.146 | 0.70 | 0.55 | -0.89 | 0.60 | 3.24E-07 | HLA-DRB5(dist=13692), HLA-DRB6(dist=8792)  | intergenic     |
| 6 | 32480396 | T | C | rs80042203              | 6.59E-06 | 0.288 | 0.222 | 0.70 | 0.59 | -0.84 | 2.81E-03   | 0.219 | 0.168 | 0.72 | 0.57 | -0.9  | 0.62 | 3.24E-07 | HLA-DRA(dist=67570), HLA-DRB5(dist=4758)   | intergenic     |
| 6 | 32558317 | T | C | rs9270387               | 8.01E-04 | 0.378 | 0.316 | 0.78 | 0.66 | -0.93 | 1.84E-05   | 0.358 | 0.278 | 0.69 | 0.57 | -0.84 | 0.65 | 3.25E-07 | HLA-DRB1                                   | upstream       |
| 6 | 32537640 | C | T | rs73726846              | 1.59E-05 | 0.288 | 0.225 | 0.72 | 0.6  | -0.86 | 1.40E-03   | 0.234 | 0.179 | 0.71 | 0.57 | -0.89 | 0.62 | 3.25E-07 | HLA-DRB6(dist=9861), HLA-DRB1(dist=8907)   | intergenic     |
| 6 | 32520565 | C | T | rs115505845             | 7.65E-06 | 0.239 | 0.180 | 0.70 | 0.57 | -0.85 | 2.22E-03   | 0.212 | 0.159 | 0.71 | 0.56 | -0.89 | 0.61 | 3.27E-07 | HLA-DRB6                                   | ncRNA_exonic   |
| 6 | 32486682 | A | C | rs113440750             | 5.99E-06 | 0.304 | 0.237 | 0.71 | 0.6  | -0.85 | 3.07E-03</ |       |       |      |      |       |      |          |                                            |                |

|   |          |   |   |                                    |          |       |       |      |      |       |          |       |       |      |      |       |      |          |                                            |                |
|---|----------|---|---|------------------------------------|----------|-------|-------|------|------|-------|----------|-------|-------|------|------|-------|------|----------|--------------------------------------------|----------------|
| 6 | 32526526 | A | G | rs35083819                         | 1.20E-05 | 0.214 | 0.158 | 0.69 | 0.56 | -0.84 | 1.69E-03 | 0.187 | 0.137 | 0.69 | 0.54 | -0.88 | 0.59 | 3.41E-07 | HLA-DRB6                                   | ncRNA_intronic |
| 6 | 32553716 | T | C | rs9270049                          | 1.46E-05 | 0.270 | 0.206 | 0.70 | 0.58 | -0.85 | 1.58E-03 | 0.219 | 0.164 | 0.70 | 0.56 | -0.88 | 0.62 | 3.41E-07 | HLA-DRB1                                   | intronic       |
| 6 | 32544697 | T | A | rs9269573                          | 1.65E-06 | 0.251 | 0.185 | 0.68 | 0.56 | -0.82 | 8.81E-03 | 0.182 | 0.141 | 0.74 | 0.58 | -0.94 | 0.60 | 3.43E-07 | HLA-DRB6(dist=16918), HLA-DRB1(dist=1850)  | intergenic     |
| 6 | 32551621 | A | G | rs9269926                          | 1.83E-05 | 0.252 | 0.194 | 0.71 | 0.59 | -0.86 | 1.24E-03 | 0.218 | 0.163 | 0.70 | 0.56 | -0.88 | 0.61 | 3.44E-07 | HLA-DRB1                                   | intronic       |
| 6 | 32460193 | G | A | rs201568677;rs567753003;rs76308833 | 1.93E-05 | 0.175 | 0.240 | 0.67 | 0.55 | -0.83 | 1.33E-03 | 0.194 | 0.258 | 0.69 | 0.55 | -0.87 | 0.64 | 3.47E-07 | HLA-DRA(dist=47367), HLA-DRB5(dist=24961)  | intergenic     |
| 6 | 32579420 | C | A | rs9271225                          | 9.34E-04 | 0.321 | 0.261 | 0.75 | 0.63 | -0.89 | 1.67E-05 | 0.336 | 0.251 | 0.66 | 0.54 | -0.81 | 0.67 | 3.48E-07 | HLA-DRB1(dist=21807), HLA-DQA1(dist=25763) | intergenic     |
| 6 | 32507112 | G | A | rs143811457                        | 5.31E-05 | 0.150 | 0.208 | 0.67 | 0.54 | -0.84 | 5.04E-04 | 0.146 | 0.212 | 0.63 | 0.49 | -0.82 | 0.63 | 3.49E-07 | HLA-DRB5(dist=9106), HLA-DRB6(dist=13378)  | intergenic     |
| 6 | 32505320 | T | C | rs75880270                         | 8.39E-06 | 0.246 | 0.184 | 0.69 | 0.57 | -0.84 | 2.38E-03 | 0.197 | 0.146 | 0.70 | 0.55 | -0.88 | 0.61 | 3.50E-07 | HLA-DRB5(dist=7314), HLA-DRB6(dist=15170)  | intergenic     |
| 6 | 32540462 | T | C | rs9269347                          | 9.26E-04 | 0.427 | 0.368 | 0.78 | 0.66 | -0.92 | 1.72E-05 | 0.406 | 0.323 | 0.70 | 0.58 | -0.84 | 0.67 | 3.53E-07 | HLA-DRB6(dist=12683), HLA-DRB1(dist=6085)  | intergenic     |
| 6 | 32554540 | A | C | rs9270099                          | 1.18E-03 | 0.273 | 0.223 | 0.77 | 0.64 | -0.92 | 1.39E-05 | 0.281 | 0.209 | 0.67 | 0.55 | -0.83 | 0.62 | 3.54E-07 | HLA-DRB1                                   | intronic       |
| 6 | 32458228 | T | C | rs62405571                         | 2.44E-06 | 0.289 | 0.221 | 0.70 | 0.58 | -0.84 | 5.95E-03 | 0.223 | 0.175 | 0.74 | 0.59 | -0.93 | 0.62 | 3.54E-07 | HLA-DRA(dist=45402), HLA-DRB5(dist=26926)  | intergenic     |
| 6 | 32504395 | G | A | rs72851070                         | 9.69E-06 | 0.256 | 0.195 | 0.70 | 0.58 | -0.85 | 2.14E-03 | 0.202 | 0.150 | 0.70 | 0.55 | -0.88 | 0.61 | 3.55E-07 | HLA-DRB5(dist=6389), HLA-DRB6(dist=16095)  | intergenic     |
| 6 | 32509050 | A | C | rs73727962                         | 1.00E-03 | 0.332 | 0.278 | 0.78 | 0.65 | -0.93 | 1.95E-05 | 0.327 | 0.247 | 0.68 | 0.55 | -0.83 | 0.65 | 3.57E-07 | HLA-DRB5(dist=11044), HLA-DRB6(dist=11440) | intergenic     |
| 6 | 32509053 | C | T | rs76722140                         | 1.01E-03 | 0.332 | 0.278 | 0.78 | 0.65 | -0.93 | 1.95E-05 | 0.327 | 0.247 | 0.68 | 0.55 | -0.83 | 0.65 | 3.60E-07 | HLA-DRB5(dist=11047), HLA-DRB6(dist=11437) | intergenic     |
| 6 | 32576838 | C | T | rs9271123                          | 8.31E-04 | 0.362 | 0.304 | 0.77 | 0.65 | -0.92 | 2.32E-05 | 0.350 | 0.266 | 0.67 | 0.55 | -0.82 | 0.67 | 3.61E-07 | HLA-DRB1(dist=19225), HLA-DQA1(dist=28345) | intergenic     |
| 6 | 32478534 | C | T | rs114899036                        | 2.89E-05 | 0.376 | 0.439 | 0.77 | 0.65 | -0.91 | 9.47E-04 | 0.551 | 0.490 | 0.78 | 0.65 | -0.94 | 0.64 | 3.62E-07 | HLA-DRA(dist=65708), HLA-DRB5(dist=6620)   | intergenic     |
| 6 | 32508213 | C | T | rs75387045                         | 2.16E-05 | 0.148 | 0.209 | 0.66 | 0.52 | -0.82 | 1.26E-03 | 0.195 | 0.216 | 0.66 | 0.51 | -0.86 | 0.63 | 3.67E-07 | HLA-DRB5(dist=10207), HLA-DRB6(dist=12277) | intergenic     |
| 6 | 32502959 | T | C | rs72851057                         | 7.86E-06 | 0.242 | 0.184 | 0.71 | 0.58 | -0.86 | 2.30E-03 | 0.202 | 0.150 | 0.70 | 0.55 | -0.88 | 0.60 | 3.67E-07 | HLA-DRB5(dist=4953), HLA-DRB6(dist=17531)  | intergenic     |
| 6 | 32457013 | A | G | rs76388981                         | 2.75E-06 | 0.372 | 0.444 | 0.74 | 0.63 | -0.88 | 5.65E-03 | 0.542 | 0.480 | 0.78 | 0.65 | -0.94 | 0.66 | 3.67E-07 | HLA-DRA(dist=44187), HLA-DRB5(dist=28141)  | intergenic     |
| 6 | 32509895 | G | A | rs28844904                         | 9.50E-06 | 0.233 | 0.175 | 0.70 | 0.57 | -0.85 | 2.15E-03 | 0.196 | 0.144 | 0.69 | 0.55 | -0.88 | 0.60 | 3.67E-07 | HLA-DRB5(dist=11889), HLA-DRB6(dist=10595) | intergenic     |
| 6 | 32509260 | T | C | rs72853943                         | 1.07E-03 | 0.324 | 0.272 | 0.78 | 0.65 | -0.93 | 1.88E-05 | 0.324 | 0.244 | 0.68 | 0.55 | -0.83 | 0.65 | 3.73E-07 | HLA-DRB5(dist=11254), HLA-DRB6(dist=11230) | intergenic     |
| 6 | 32573909 | C | A | rs9270980                          | 2.37E-05 | 0.244 | 0.177 | 0.67 | 0.55 | -0.81 | 1.19E-03 | 0.216 | 0.158 | 0.68 | 0.54 | -0.86 | 0.64 | 3.79E-07 | HLA-DRB1(dist=16296), HLA-DQA1(dist=31274) | intergenic     |
| 6 | 32541881 | C | T | rs9269438                          | 1.96E-05 | 0.244 | 0.185 | 0.70 | 0.58 | -0.86 | 1.34E-03 | 0.205 | 0.151 | 0.69 | 0.55 | -0.87 | 0.61 | 3.80E-07 | HLA-DRB6(dist=14102), HLA-DRB1(dist=4666)  | intergenic     |
| 6 | 32535525 | G | A | rs35176742                         | 2.35E-05 | 0.105 | 0.150 | 0.66 | 0.51 | -0.86 | 1.17E-03 | 0.119 | 0.167 | 0.67 | 0.5  | -0.89 | 0.55 | 3.81E-07 | HLA-DRB6(dist=7746), HLA-DRB1(dist=11022)  | intergenic     |
| 6 | 32456735 | T | C | rs75151587                         | 9.51E-06 | 0.370 | 0.439 | 0.75 | 0.63 | -0.89 | 2.52E-03 | 0.546 | 0.482 | 0.78 | 0.64 | -0.94 | 0.66 | 3.81E-07 | HLA-DRA(dist=43909), HLA-DRB5(dist=28419)  | intergenic     |
| 6 | 32579355 | A | C | rs9271220                          | 1.06E-03 | 0.346 | 0.288 | 0.76 | 0.64 | -0.91 | 1.68E-05 | 0.338 | 0.253 | 0.66 | 0.54 | -0.81 | 0.67 | 3.81E-07 | HLA-DRB1(dist=21742), HLA-DQA1(dist=25828) | intergenic     |
| 6 | 32502996 | T | C | rs79841512                         | 9.56E-06 | 0.241 | 0.183 | 0.70 | 0.58 | -0.86 | 2.11E-03 | 0.202 | 0.149 | 0.69 | 0.55 | -0.88 | 0.61 | 3.82E-07 | HLA-DRB5(dist=4990), HLA-DRB6(dist=17494)  | intergenic     |
| 6 | 32558649 | C | A | rs9270427                          | 5.19E-04 | 0.400 | 0.339 | 0.77 | 0.65 | -0.91 | 4.72E-05 | 0.392 | 0.308 | 0.69 | 0.57 | -0.84 | 0.67 | 3.82E-07 | HLA-DRB1(dist=1036), HLA-DQA1(dist=46534)  | intergenic     |
| 6 | 32606444 | G | A | rs4530904                          | 1.24E-06 | 0.301 | 0.224 | 0.67 | 0.56 | -0.8  | 1.03E-02 | 0.251 | 0.200 | 0.74 | 0.6  | -0.92 | 0.65 | 3.82E-07 | HLA-DQA1                                   | intronic       |
| 6 | 32505508 | C | T | rs72851099                         | 1.01E-05 | 0.227 | 0.169 | 0.69 | 0.57 | -0.85 | 2.08E-03 | 0.195 | 0.144 | 0.69 | 0.55 | -0.88 | 0.60 | 3.83E-07 | HLA-DRB5(dist=7502), HLA-DRB6(dist=14982)  | intergenic     |
| 6 | 32455777 | C | T | rs79648921                         | 6.62E-06 | 0.429 | 0.501 | 0.75 | 0.63 | -0.88 | 3.30E-03 | 0.506 | 0.441 | 0.77 | 0.64 | -0.93 | 0.67 | 3.84E-07 | HLA-DRA(dist=42951), HLA-DRB5(dist=29377)  | intergenic     |
| 6 | 32522813 | A | T | rs35222480                         | 5.49E-06 | 0.229 | 0.170 | 0.69 | 0.57 | -0.84 | 3.36E-03 | 0.185 | 0.137 | 0.70 | 0.55 | -0.89 | 0.60 | 3.85E-07 | HLA-DRB6                                   | ncRNA_intronic |
| 6 | 32577022 | A | G | rs9271137                          | 5.08E-04 | 0.374 | 0.314 | 0.76 | 0.65 | -0.91 | 4.70E-05 | 0.353 | 0.273 | 0.69 | 0.56 | -0.83 | 0.67 | 3.85E-07 | HLA-DRB1(dist=19409), HLA-DQA1(dist=28161) | intergenic     |
| 6 | 32573039 | C | T | rs9270951                          | 1.80E-03 | 0.324 | 0.267 | 0.76 | 0.64 | -0.91 | 7.13E-06 | 0.331 | 0.241 | 0.64 | 0.53 | -0.79 | 0.67 | 3.86E-07 | HLA-DRB1(dist=15426), HLA-DQA1(dist=32144) | intergenic     |
| 6 | 32513714 | A | C | rs34791134                         | 1.02E-06 | 0.216 | 0.156 | 0.67 | 0.55 | -0.82 | 9.10E-03 | 0.173 | 0.131 | 0.72 | 0.56 | -0.93 | 0.59 | 3.86E-07 | HLA-DRB5(dist=15708), HLA-DRB6(dist=6776)  | intergenic     |
| 6 | 32551329 | G | A | rs9269908                          | 1.03E-03 | 0.356 | 0.301 | 0.78 | 0.66 | -0.93 | 1.57E-05 | 0.312 | 0.235 | 0.68 | 0.55 | -0.83 | 0.65 | 3.88E-07 | HLA-DRB1                                   | intronic       |
| 6 | 32471657 | A | G | rs112933569                        | 7.05E-04 | 0.266 | 0.314 | 0.79 | 0.66 | -0.95 | 2.87E-05 | 0.239 | 0.321 | 0.66 | 0.53 | -0.83 | 0.64 | 3.91E-07 | HLA-DRA(dist=58831), HLA-DRB5(dist=13497)  | intergenic     |
| 6 | 32502471 | C | T | rs77794095                         | 4.13E-05 | 0.147 | 0.204 | 0.67 | 0.54 | -0.84 | 7.24E-04 | 0.148 | 0.212 | 0.64 | 0.5  | -0.84 | 0.63 | 3.94E-07 | HLA-DRB5(dist=4465), HLA-DRB6(dist=18019)  | intergenic     |
| 6 | 32626952 | T | C | rs4713572;rs386699564              | 9.46E-06 | 0.131 | 0.196 | 0.62 | 0.49 | -0.78 | 2.23E-03 | 0.176 | 0.240 | 0.68 | 0.53 | -0.86 | 0.64 | 3.94E-07 | HLA-DQB1                                   | downstream     |
| 6 | 32481184 | C | T | rs111481220                        | 4.37E-05 | 0.113 | 0.162 | 0.66 | 0.51 | -0.85 | 6.88E-04 | 0.133 | 0.189 | 0.66 | 0.5  | -0.87 | 0.59 | 3.96E-07 | HLA-DRA(dist=68358), HLA-DRB5(dist=3970)   | intergenic     |
| 6 | 32499154 | C | T | rs111596400                        | 1.79E-05 | 0.495 | 0.428 | 0.76 | 0.65 | -0.9  | 1.52E-03 | 0.417 | 0.356 | 0.77 | 0.64 | -0.93 | 0.64 | 3.97E-07 | HLA-DRB5(dist=1148), HLA-DRB6(dist=21336)  | intergenic     |
| 6 | 32567502 | A | T | rs9270716;rs386699445              | 1.72E-03 | 0.307 | 0.251 | 0.76 | 0.63 | -0.89 | 8.07E-06 | 0.328 | 0.239 | 0.64 | 0.53 | -0.79 | 0.67 | 3.97E-07 | HLA-DRB1(dist=9889), HLA-DQA1(dist=37681)  | intergenic     |
| 6 | 32643824 | G | T | rs141967600                        | 6.17E-04 | 0.197 | 0.253 | 0.73 | 0.59 | -0.89 | 3.95E-05 | 0.178 | 0.255 | 0.63 | 0.49 | -0.8  | 0.65 | 3.97E-07 | HLA-DQB1(dist=9358), HLA-DQA2(dist=65339)  | intergenic     |
| 6 | 32460038 | G | C | rs114704467                        | 2.48E-05 | 0.175 | 0.237 | 0.68 | 0.55 | -0.84 | 1.22E-03 | 0.184 | 0.248 | 0.68 | 0.54 | -0.87 | 0.64 | 3.99E-07 | HLA-DRA(dist=47212), HLA-DRB5(dist=25116)  | intergenic     |
| 6 | 32674027 | C | G | rs3134969;rs201985750              | 3.09E-05 | 0.305 | 0.236 | 0.70 | 0.59 | -0.84 | 9.74E-04 | 0.288 | 0.224 | 0.71 | 0.58 | -0.88 | 0.66 | 3.99E-07 | HLA-DQB1(dist=39561), HLA-DQA2(dist=35136) | intergenic     |
| 6 | 32605336 | G | A | rs386699542;rs9272435              | 5.35E-05 | 0.178 | 0.243 | 0.67 | 0.55 | -0.83 | 5.77E-04 | 0.205 | 0.270 | 0.70 | 0.56 | -0.88 | 0.66 | 4.00E-07 | HLA-DQA1                                   | intronic       |
| 6 | 32571962 | A | C | rs9270902                          | 1.30E-03 | 0.305 | 0.247 | 0.75 | 0.62 | -0.89 | 1.22E-05 | 0.323 | 0.236 | 0.65 | 0.53 | -0.79 | 0.67 | 4.02E-07 | HLA-DRB1(dist=14349), HLA-DQA1(dist=33221) | intergenic     |
| 6 | 32517933 | T | C | rs62405644;rs386699403             | 1.57E-05 | 0.335 | 0.276 | 0.76 | 0.63 | -0.9  | 1.63E-03 | 0.311 | 0.252 | 0.74 | 0.61 | -0.91 | 0.63 | 4.02E-07 | HLA-DRB5(dist=19927), HLA-DRB6(dist=2557)  | intergenic     |
| 6 | 32551406 | A | G | rs9269913                          | 6.76E-04 | 0.307 | 0.254 | 0.77 | 0.64 | -0.92 | 3.34E-05 | 0.301 | 0.230 | 0.69 | 0.56 | -0.85 | 0.64 | 4.06E-07 | HLA-DRB1                                   | intronic       |
| 6 | 32456513 | A | C | rs75814008                         | 1.26E-05 | 0.373 | 0.441 | 0.75 | 0.64 | -0.89 | 2.05E-03 | 0.554 | 0.489 | 0.77 | 0.64 | -0.93 | 0.66 | 4.06E-07 | HLA-DRA(dist=43687), HLA-DRB5(dist=28641)  | intergenic     |
| 6 | 32460241 | A | C | rs79851609                         | 4.73E-05 | 0.177 | 0.237 | 0.69 | 0.56 | -0.85 | 6.72E-04 | 0.181 | 0.249 | 0.67 | 0.52 | -0.85 | 0.65 | 4.06E-07 | HLA-DRA(dist=47415), HLA-DRB5(dist=24913)  | intergenic     |
| 6 | 32541868 | C | A | rs9269437                          | 2.14E-05 | 0.244 | 0.186 | 0.71 | 0.58 | -0.86 | 1.33E-03 | 0.205 | 0.151 | 0.69 | 0.55 | -0.87 | 0.61 | 4.06E-07 | HLA-DRB6(dist=14089), HLA-DRB1(dist=4679)  | intergenic     |
| 6 | 32484924 | A | G | rs114586378                        | 4.13E-06 | 0.443 | 0.365 | 0.72 | 0.61 | -0.85 | 1.24E-02 | 0.312 | 0.265 | 0.80 | 0.65 | -0.97 | 0.64 | 4.07E-07 | HLA-DRB5                                   | downstream     |
| 6 | 32559175 | C | T | rs9270502                          | 2.66E-05 | 0.232 | 0.168 | 0.67 | 0.55 | -0.82 | 1.15E-03 | 0.213 | 0.156 | 0.68 | 0.54 | -0.86 | 0.63 | 4.09E-07 | HLA-DRB1(dist=1562), HLA-DQA1(dist=46008)  | intergenic     |
| 6 | 32459451 | T | C | rs77123178                         | 5.75E-05 | 0.121 | 0.172 | 0.67 | 0.52 | -0.85 | 5.49E-04 | 0.127 | 0.182 | 0.66 | 0.5  | -0.87 | 0.58 | 4.09E-07 | HLA-DRA(dist=46625), HLA-DRB5(dist=25703   |                |

|    |          |   |   |                                   |          |       |       |      |      |       |          |       |       |      |      |       |      |          |                                            |                |
|----|----------|---|---|-----------------------------------|----------|-------|-------|------|------|-------|----------|-------|-------|------|------|-------|------|----------|--------------------------------------------|----------------|
| 6  | 32553542 | T | C | rs33980131                        | 3.45E-06 | 0.105 | 0.163 | 0.61 | 0.47 | -0.78 | 5.40E-03 | 0.122 | 0.167 | 0.69 | 0.52 | -0.92 | 0.58 | 4.24E-07 | HLA-DRB1                                   | intronic       |
| 6  | 32544641 | A | G | rs9269570                         | 2.19E-05 | 0.255 | 0.195 | 0.71 | 0.59 | -0.86 | 1.43E-03 | 0.200 | 0.148 | 0.70 | 0.55 | -0.88 | 0.61 | 4.24E-07 | HLA-DRB6(dist=16862), HLA-DRB1(dist=1906)  | intergenic     |
| 6  | 32491879 | C | T | rs72508447                        | 4.23E-05 | 0.274 | 0.215 | 0.72 | 0.6  | -0.87 | 7.90E-04 | 0.215 | 0.161 | 0.70 | 0.55 | -0.88 | 0.61 | 4.30E-07 | HLA-DRB5                                   | intronic       |
| 6  | 32523438 | G | C | rs34182525                        | 8.65E-06 | 0.239 | 0.181 | 0.70 | 0.58 | -0.85 | 2.64E-03 | 0.200 | 0.149 | 0.70 | 0.55 | -0.88 | 0.61 | 4.32E-07 | HLA-DRB6                                   | ncRNA_intronic |
| 6  | 32531939 | G | T | rs9269941                         | 2.93E-05 | 0.299 | 0.360 | 0.76 | 0.64 | -0.9  | 1.12E-03 | 0.319 | 0.374 | 0.78 | 0.64 | -0.96 | 0.62 | 4.32E-07 | HLA-DRB1                                   | exonic         |
| 6  | 32486358 | T | C | NA                                | 5.41E-06 | 0.349 | 0.281 | 0.73 | 0.61 | -0.87 | 4.31E-03 | 0.273 | 0.220 | 0.75 | 0.61 | -0.93 | 0.63 | 4.40E-07 | HLA-DQA1(dist=3992), HLA-DQB1(dist=11820)  | intergenic     |
| 6  | 32502745 | G | C | rs74635045                        | 4.00E-05 | 0.145 | 0.202 | 0.67 | 0.54 | -0.84 | 8.64E-04 | 0.141 | 0.202 | 0.65 | 0.5  | -0.85 | 0.62 | 4.40E-07 | HLA-DRB5(dist=4739), HLA-DRB6(dist=17745)  | intergenic     |
| 6  | 32538164 | A | C | rs111897044                       | 2.71E-05 | 0.285 | 0.222 | 0.72 | 0.6  | -0.86 | 1.25E-03 | 0.222 | 0.166 | 0.69 | 0.55 | -0.87 | 0.63 | 4.46E-07 | HLA-DRB6(dist=10385), HLA-DRB1(dist=8383)  | intergenic     |
| 19 | 52786794 | A | C | rs74507237                        | 1.53E-01 | 0.038 | 0.029 | 1.34 | 0.87 | -2.08 | 8.43E-11 | 0.077 | 0.035 | 2.31 | 1.6  | -3.31 | 2.94 | 4.46E-07 | ZNF766                                     | intronic       |
| 6  | 32486625 | G | C | rs142829465                       | 1.32E-05 | 0.323 | 0.258 | 0.73 | 0.61 | -0.87 | 2.17E-03 | 0.259 | 0.200 | 0.71 | 0.58 | -0.89 | 0.64 | 4.47E-07 | HLA-DRB5                                   | intronic       |
| 6  | 32594006 | C | A | rs9271759                         | 2.36E-05 | 0.160 | 0.228 | 0.64 | 0.52 | -0.8  | 1.45E-03 | 0.154 | 0.216 | 0.66 | 0.51 | -0.85 | 0.66 | 4.48E-07 | HLA-DRB1(dist=36393), HLA-DQA1(dist=11177) | intergenic     |
| 6  | 32558092 | C | T | rs9270357                         | 9.31E-04 | 0.309 | 0.255 | 0.76 | 0.64 | -0.91 | 2.25E-05 | 0.300 | 0.225 | 0.68 | 0.55 | -0.83 | 0.65 | 4.48E-07 | HLA-DRB1                                   | upstream       |
| 6  | 32504133 | G | A | rs67342079                        | 9.41E-06 | 0.231 | 0.172 | 0.69 | 0.57 | -0.84 | 2.56E-03 | 0.198 | 0.147 | 0.70 | 0.55 | -0.88 | 0.61 | 4.48E-07 | HLA-DRB5(dist=6127), HLA-DRB6(dist=16357)  | intergenic     |
| 6  | 32460025 | G | T | rs144441217                       | 3.52E-05 | 0.170 | 0.231 | 0.68 | 0.55 | -0.84 | 9.98E-04 | 0.179 | 0.244 | 0.67 | 0.53 | -0.86 | 0.64 | 4.49E-07 | HLA-DRA(dist=47199), HLA-DRB5(dist=25129)  | intergenic     |
| 6  | 32489650 | A | G | rs115862317                       | 2.13E-05 | 0.242 | 0.184 | 0.70 | 0.58 | -0.86 | 1.48E-03 | 0.203 | 0.152 | 0.70 | 0.55 | -0.89 | 0.61 | 4.49E-07 | HLA-DRB5                                   | intronic       |
| 6  | 32558096 | A | G | rs9270358                         | 9.31E-04 | 0.309 | 0.255 | 0.76 | 0.64 | -0.91 | 2.25E-05 | 0.300 | 0.225 | 0.68 | 0.55 | -0.83 | 0.65 | 4.49E-07 | HLA-DRB1                                   | upstream       |
| 6  | 32571669 | C | T | rs28383181                        | 1.28E-05 | 0.138 | 0.205 | 0.62 | 0.49 | -0.78 | 2.53E-03 | 0.132 | 0.188 | 0.66 | 0.5  | -0.86 | 0.64 | 4.49E-07 | HLA-DRB1(dist=14056), HLA-DQA1(dist=33514) | intergenic     |
| 6  | 32551382 | A | T | rs9269911                         | 3.33E-05 | 0.234 | 0.179 | 0.72 | 0.59 | -0.87 | 9.77E-04 | 0.207 | 0.152 | 0.69 | 0.54 | -0.87 | 0.60 | 4.51E-07 | HLA-DRB1                                   | intronic       |
| 6  | 32514284 | A | T | rs66863443                        | 1.19E-05 | 0.249 | 0.190 | 0.71 | 0.58 | -0.85 | 2.25E-03 | 0.198 | 0.147 | 0.69 | 0.55 | -0.88 | 0.61 | 4.52E-07 | HLA-DRB5(dist=16278), HLA-DRB6(dist=6206)  | intergenic     |
| 6  | 32556689 | G | T | rs9270226                         | 6.21E-04 | 0.315 | 0.259 | 0.76 | 0.63 | -0.9  | 3.92E-05 | 0.297 | 0.225 | 0.69 | 0.56 | -0.85 | 0.65 | 4.54E-07 | HLA-DRB1                                   | intronic       |
| 6  | 32553026 | G | A | rs9270018                         | 2.96E-05 | 0.232 | 0.174 | 0.70 | 0.58 | -0.85 | 1.10E-03 | 0.207 | 0.152 | 0.69 | 0.54 | -0.87 | 0.61 | 4.57E-07 | HLA-DRB1                                   | intronic       |
| 6  | 32460002 | A | C | rs76507644                        | 2.94E-05 | 0.177 | 0.239 | 0.69 | 0.56 | -0.85 | 1.22E-03 | 0.182 | 0.245 | 0.68 | 0.54 | -0.87 | 0.64 | 4.58E-07 | HLA-DRA(dist=47176), HLA-DRB5(dist=25152)  | intergenic     |
| 6  | 32674059 | A | G | rs386699692;rs3134968             | 3.00E-05 | 0.300 | 0.230 | 0.70 | 0.58 | -0.84 | 1.16E-03 | 0.290 | 0.227 | 0.72 | 0.58 | -0.88 | 0.67 | 4.60E-07 | HLA-DQB1(dist=39593), HLA-DQA2(dist=35104) | intergenic     |
| 6  | 32610008 | C | T | rs2308890                         | 2.67E-05 | 0.144 | 0.210 | 0.64 | 0.51 | -0.8  | 1.28E-03 | 0.147 | 0.211 | 0.65 | 0.5  | -0.84 | 0.65 | 4.61E-07 | HLA-DQA1                                   | exonic         |
| 6  | 32576341 | G | A | rs9271093                         | 2.70E-05 | 0.227 | 0.163 | 0.66 | 0.54 | -0.81 | 1.30E-03 | 0.215 | 0.158 | 0.68 | 0.54 | -0.86 | 0.64 | 4.61E-07 | HLA-DRB1(dist=18728), HLA-DQA1(dist=28842) | intergenic     |
| 6  | 32542369 | T | C | rs9269473                         | 1.44E-03 | 0.326 | 0.275 | 0.78 | 0.66 | -0.94 | 1.72E-05 | 0.321 | 0.241 | 0.67 | 0.55 | -0.82 | 0.65 | 4.61E-07 | HLA-DRB6(dist=14590), HLA-DRB1(dist=4178)  | intergenic     |
| 6  | 32541974 | C | T | rs9269444                         | 2.21E-05 | 0.237 | 0.180 | 0.71 | 0.58 | -0.86 | 1.43E-03 | 0.204 | 0.150 | 0.69 | 0.55 | -0.87 | 0.61 | 4.64E-07 | HLA-DRB6(dist=14195), HLA-DRB1(dist=4573)  | intergenic     |
| 6  | 32609586 | A | G | rs28383460                        | 2.69E-05 | 0.145 | 0.211 | 0.64 | 0.51 | -0.8  | 1.30E-03 | 0.148 | 0.211 | 0.65 | 0.5  | -0.84 | 0.65 | 4.66E-07 | HLA-DQA1                                   | intronic       |
| 6  | 32470283 | C | A | rs145455664                       | 9.95E-06 | 0.220 | 0.287 | 0.70 | 0.58 | -0.85 | 3.18E-03 | 0.246 | 0.307 | 0.74 | 0.59 | -0.92 | 0.65 | 4.66E-07 | HLA-DRA(dist=57457), HLA-DRB5(dist=14871)  | intergenic     |
| 6  | 32609671 | G | A | rs9272736                         | 2.48E-05 | 0.138 | 0.202 | 0.63 | 0.5  | -0.8  | 1.35E-03 | 0.147 | 0.210 | 0.65 | 0.5  | -0.84 | 0.65 | 4.67E-07 | HLA-DQA1                                   | intronic       |
| 6  | 32609673 | G | A | rs9272737                         | 2.48E-05 | 0.138 | 0.202 | 0.63 | 0.5  | -0.8  | 1.35E-03 | 0.147 | 0.210 | 0.65 | 0.5  | -0.84 | 0.65 | 4.68E-07 | HLA-DQA1                                   | intronic       |
| 6  | 32544650 | T | A | rs9269571                         | 2.72E-05 | 0.262 | 0.202 | 0.71 | 0.59 | -0.86 | 1.32E-03 | 0.204 | 0.151 | 0.69 | 0.55 | -0.88 | 0.61 | 4.71E-07 | HLA-DRB6(dist=16871), HLA-DRB1(dist=1897)  | intergenic     |
| 6  | 32456976 | A | G | rs77213787                        | 4.34E-05 | 0.380 | 0.444 | 0.77 | 0.65 | -0.91 | 8.39E-04 | 0.421 | 0.492 | 0.75 | 0.62 | -0.91 | 0.66 | 4.72E-07 | HLA-DRA(dist=44150), HLA-DRB5(dist=28178)  | intergenic     |
| 6  | 32589668 | C | A | rs9271516                         | 2.55E-05 | 0.144 | 0.213 | 0.62 | 0.5  | -0.78 | 1.43E-03 | 0.143 | 0.206 | 0.64 | 0.49 | -0.84 | 0.66 | 4.72E-07 | HLA-DRB1(dist=32055), HLA-DQA1(dist=15515) | intergenic     |
| 6  | 32535188 | A | G | rs112114145                       | 5.28E-04 | 0.359 | 0.305 | 0.78 | 0.66 | -0.93 | 5.93E-05 | 0.351 | 0.277 | 0.71 | 0.58 | -0.86 | 0.65 | 4.72E-07 | HLA-DRB6(dist=7409), HLA-DRB1(dist=11359)  | intergenic     |
| 6  | 32455534 | T | A | rs76101360                        | 2.30E-05 | 0.167 | 0.222 | 0.70 | 0.56 | -0.87 | 1.53E-03 | 0.172 | 0.228 | 0.70 | 0.55 | -0.9  | 0.62 | 4.73E-07 | HLA-DRA(dist=42708), HLA-DRB5(dist=29620)  | intergenic     |
| 6  | 32673134 | A | G | rs141593270                       | 3.96E-07 | 0.072 | 0.045 | 1.63 | 1.17 | -2.27 | 1.48E-02 | 0.065 | 0.044 | 1.51 | 1.03 | -2.22 | 3.08 | 4.73E-07 | HLA-DQB1(dist=38668), HLA-DQA2(dist=36029) | intergenic     |
| 6  | 32505551 | A | G | rs68141957                        | 1.30E-05 | 0.223 | 0.167 | 0.70 | 0.57 | -0.85 | 2.07E-03 | 0.195 | 0.144 | 0.69 | 0.55 | -0.88 | 0.60 | 4.77E-07 | HLA-DRB5(dist=7545), HLA-DRB6(dist=14939)  | intergenic     |
| 6  | 32525259 | T | C | rs28455809                        | 1.34E-05 | 0.293 | 0.230 | 0.72 | 0.6  | -0.87 | 2.26E-03 | 0.230 | 0.176 | 0.71 | 0.57 | -0.89 | 0.63 | 4.77E-07 | HLA-DRB6                                   | ncRNA_intronic |
| 6  | 32456287 | A | T | rs75349662                        | 6.24E-06 | 0.425 | 0.499 | 0.74 | 0.63 | -0.87 | 4.28E-03 | 0.501 | 0.443 | 0.79 | 0.66 | -0.95 | 0.67 | 4.79E-07 | HLA-DRA(dist=43461), HLA-DRB5(dist=28867)  | intergenic     |
| 6  | 32459923 | A | G | rs80072299                        | 3.75E-05 | 0.165 | 0.227 | 0.68 | 0.54 | -0.84 | 1.02E-03 | 0.156 | 0.218 | 0.66 | 0.51 | -0.86 | 0.64 | 4.79E-07 | HLA-DRA(dist=47097), HLA-DRB5(dist=25231)  | intergenic     |
| 6  | 32517119 | G | T | rs71536503                        | 8.34E-06 | 0.278 | 0.214 | 0.71 | 0.59 | -0.85 | 3.43E-03 | 0.219 | 0.168 | 0.72 | 0.57 | -0.9  | 0.63 | 4.80E-07 | HLA-DRB5(dist=19113), HLA-DRB6(dist=3371)  | intergenic     |
| 6  | 32505386 | C | T | rs71549286                        | 9.98E-06 | 0.258 | 0.196 | 0.70 | 0.58 | -0.85 | 2.78E-03 | 0.204 | 0.152 | 0.70 | 0.56 | -0.89 | 0.62 | 4.81E-07 | HLA-DRB5(dist=7380), HLA-DRB6(dist=15104)  | intergenic     |
| 6  | 32534010 | A | G | rs74579911                        | 1.11E-05 | 0.287 | 0.223 | 0.71 | 0.59 | -0.85 | 2.87E-03 | 0.210 | 0.158 | 0.71 | 0.56 | -0.89 | 0.63 | 4.84E-07 | HLA-DRB6(dist=6231), HLA-DRB1(dist=12537)  | intergenic     |
| 6  | 32478484 | T | G | rs111724472                       | 5.91E-06 | 0.334 | 0.266 | 0.72 | 0.61 | -0.86 | 4.63E-03 | 0.253 | 0.204 | 0.75 | 0.61 | -0.94 | 0.63 | 4.85E-07 | HLA-DRA(dist=65658), HLA-DRB5(dist=6670)   | intergenic     |
| 6  | 32609746 | C | T | rs9272744                         | 2.84E-05 | 0.146 | 0.211 | 0.64 | 0.51 | -0.8  | 1.29E-03 | 0.148 | 0.212 | 0.65 | 0.5  | -0.84 | 0.65 | 4.86E-07 | HLA-DQA1                                   | intronic       |
| 6  | 32569297 | A | G | rs9270797                         | 9.21E-06 | 0.347 | 0.426 | 0.72 | 0.6  | -0.85 | 3.11E-03 | 0.395 | 0.465 | 0.75 | 0.62 | -0.91 | 0.69 | 4.87E-07 | HLA-DRB1(dist=11684), HLA-DQA1(dist=35886) | intergenic     |
| 13 | 48110785 | G | A | rs7334231                         | 2.55E-07 | 0.050 | 0.119 | 0.39 | 0.27 | -0.56 | 9.69E-02 | 0.077 | 0.092 | 0.83 | 0.58 | -1.17 | 0.56 | 4.89E-07 | HTR2A(dist=639574), LINC00562(dist=393503) | intergenic     |
| 6  | 32527235 | G | T | rs28708891                        | 6.71E-06 | 0.254 | 0.192 | 0.70 | 0.57 | -0.84 | 3.65E-03 | 0.208 | 0.157 | 0.71 | 0.56 | -0.9  | 0.62 | 4.90E-07 | HLA-DRB6                                   | ncRNA_intronic |
| 6  | 32523975 | A | G | rs184885287                       | 5.22E-05 | 0.133 | 0.187 | 0.67 | 0.53 | -0.84 | 7.45E-04 | 0.117 | 0.169 | 0.65 | 0.49 | -0.87 | 0.60 | 4.91E-07 | HLA-DRB6                                   | ncRNA_intronic |
| 6  | 32609056 | C | T | rs386699550;rs28383441            | 2.75E-05 | 0.145 | 0.211 | 0.64 | 0.51 | -0.8  | 1.35E-03 | 0.148 | 0.211 | 0.65 | 0.5  | -0.84 | 0.65 | 4.92E-07 | HLA-DQA1                                   | intronic       |
| 6  | 32502295 | C | T | rs75802832                        | 7.70E-06 | 0.250 | 0.190 | 0.70 | 0.58 | -0.85 | 3.40E-03 | 0.198 | 0.148 | 0.71 | 0.56 | -0.89 | 0.61 | 4.92E-07 | HLA-DRB5(dist=4289), HLA-DRB6(dist=18195)  | intergenic     |
| 6  | 32604969 | A | G | rs386699540;rs9272410;rs386699541 | 8.60E-06 | 0.306 | 0.233 | 0.69 | 0.58 | -0.82 | 3.39E-03 | 0.271 | 0.209 | 0.71 | 0.58 | -0.88 | 0.66 | 4.93E-07 | HLA-DQA1                                   | upstream       |
| 6  | 32503011 | A | C | rs75940183                        | 6.52E-06 | 0.250 | 0.189 | 0.70 | 0.58 | -0.85 | 3.84E-03 | 0.201 | 0.152 | 0.71 | 0.56 | -0.9  | 0.61 | 4.98E-07 | HLA-DRB5(dist=5005), HLA-DRB6(dist=17479)  | intergenic     |
| 6  | 32608537 | A | C | rs28383418                        | 3.20E-05 | 0.145 | 0.210 | 0.64 | 0.51 | -0.8  | 1.21E-03 | 0.143 | 0.206 | 0.64 | 0.49 | -0.84 | 0.65 | 4.98E-07 | HLA-DQA1                                   | intronic       |
| 6  | 32609042 | C | A | rs28383439;rs386699550            | 2.77E-05 | 0.145 | 0.210 | 0.64 | 0.51 | -0.8  | 1.36E-03 | 0.148 | 0.211 | 0.65 | 0.5  | -0.84 | 0.65 | 4.98E-07 | HLA-DQA1                                   | intronic       |
| 6  | 32495952 | A | G | rs190670956                       | 3.32E-06 | 0.359 |       |      |      |       |          |       |       |      |      |       |      |          |                                            |                |

|    |           |   |   |                        |          |       |       |      |             |          |       |       |      |             |      |          |                                            |                |
|----|-----------|---|---|------------------------|----------|-------|-------|------|-------------|----------|-------|-------|------|-------------|------|----------|--------------------------------------------|----------------|
| 6  | 32604826  | T | A | rs9272393              | 9.68E-04 | 0.420 | 0.487 | 0.76 | 0.64 - 0.9  | 2.62E-05 | 0.385 | 0.485 | 0.67 | 0.55 - 0.81 | 0.71 | 5.14E-07 | HLA-DQA1                                   | upstream       |
| 6  | 32558176  | G | A | rs28357082             | 2.10E-05 | 0.110 | 0.159 | 0.66 | 0.51 - 0.84 | 1.91E-03 | 0.116 | 0.166 | 0.66 | 0.49 - 0.88 | 0.57 | 5.15E-07 | HLA-DRB1                                   | upstream       |
| 6  | 32553740  | G | C | rs9270050              | 4.35E-05 | 0.241 | 0.182 | 0.70 | 0.58 - 0.85 | 9.22E-04 | 0.211 | 0.154 | 0.68 | 0.54 - 0.86 | 0.62 | 5.17E-07 | HLA-DRB1                                   | intronic       |
| 6  | 32514791  | G | T | rs71534543;rs151292482 | 1.40E-05 | 0.246 | 0.187 | 0.71 | 0.58 - 0.86 | 2.18E-03 | 0.201 | 0.149 | 0.70 | 0.55 - 0.88 | 0.61 | 5.17E-07 | HLA-DRB5(dist=16785), HLA-DRB6(dist=5699)  | intergenic     |
| 6  | 32542011  | C | T | rs9269448              | 2.56E-05 | 0.237 | 0.181 | 0.71 | 0.58 - 0.86 | 1.41E-03 | 0.204 | 0.151 | 0.69 | 0.55 - 0.87 | 0.61 | 5.17E-07 | HLA-DRB6(dist=14232), HLA-DRB1(dist=4536)  | intergenic     |
| 6  | 32609456  | C | T | rs28383457             | 2.94E-05 | 0.245 | 0.210 | 0.64 | 0.51 - 0.8  | 1.34E-03 | 0.148 | 0.211 | 0.65 | 0.5 - 0.84  | 0.65 | 5.19E-07 | HLA-DQA1                                   | intronic       |
| 6  | 32610403  | C | A | rs386699558;rs3188543  | 3.05E-05 | 0.142 | 0.205 | 0.64 | 0.51 - 0.8  | 1.28E-03 | 0.148 | 0.211 | 0.65 | 0.5 - 0.84  | 0.65 | 5.21E-07 | HLA-DQA1                                   | exonic         |
| 6  | 32573040  | A | G | rs9270952              | 2.31E-03 | 0.325 | 0.269 | 0.77 | 0.64 - 0.91 | 7.36E-06 | 0.331 | 0.241 | 0.64 | 0.53 - 0.79 | 0.68 | 5.25E-07 | HLA-DRB1(dist=15427), HLA-DQA1(dist=32143) | intergenic     |
| 6  | 32480093  | T | A | rs78562376             | 5.74E-05 | 0.441 | 0.379 | 0.77 | 0.66 - 0.91 | 7.36E-04 | 0.418 | 0.352 | 0.76 | 0.63 - 0.92 | 0.65 | 5.26E-07 | HLA-DRA(dist=67267), HLA-DRB5(dist=5061)   | intergenic     |
| 6  | 32551350  | T | A | rs9269910              | 3.90E-05 | 0.233 | 0.179 | 0.72 | 0.59 - 0.87 | 9.98E-04 | 0.209 | 0.154 | 0.69 | 0.55 - 0.87 | 0.61 | 5.27E-07 | HLA-DRB1                                   | intronic       |
| 6  | 32514566  | T | C | rs62405633             | 2.31E-05 | 0.270 | 0.212 | 0.73 | 0.6 - 0.88  | 1.54E-03 | 0.236 | 0.177 | 0.70 | 0.56 - 0.87 | 0.63 | 5.29E-07 | HLA-DRB5(dist=16560), HLA-DRB6(dist=5924)  | intergenic     |
| 6  | 32498584  | C | A | rs16870187             | 6.41E-06 | 0.284 | 0.221 | 0.72 | 0.6 - 0.86  | 4.58E-03 | 0.186 | 0.139 | 0.71 | 0.56 - 0.9  | 0.62 | 5.33E-07 | HLA-DRB5                                   | upstream       |
| 6  | 32609855  | A | C | rs1048173              | 2.47E-05 | 0.146 | 0.212 | 0.64 | 0.51 - 0.8  | 1.61E-03 | 0.149 | 0.212 | 0.65 | 0.5 - 0.85  | 0.65 | 5.35E-07 | HLA-DQA1                                   | exonic         |
| 6  | 32553508  | A | G | rs9270040              | 3.80E-05 | 0.239 | 0.183 | 0.71 | 0.58 - 0.86 | 1.07E-03 | 0.211 | 0.156 | 0.69 | 0.55 - 0.87 | 0.62 | 5.37E-07 | HLA-DRB1                                   | intronic       |
| 6  | 32480199  | C | A | rs116751091            | 3.32E-05 | 0.286 | 0.226 | 0.73 | 0.61 - 0.87 | 1.26E-03 | 0.226 | 0.171 | 0.71 | 0.57 - 0.89 | 0.63 | 5.40E-07 | HLA-DRA(dist=67373), HLA-DRB5(dist=4955)   | intergenic     |
| 6  | 32526731  | A | C | rs72845730             | 2.27E-03 | 0.305 | 0.255 | 0.78 | 0.65 - 0.93 | 1.18E-05 | 0.327 | 0.243 | 0.66 | 0.54 - 0.81 | 0.65 | 5.40E-07 | HLA-DRB6                                   | ncRNA_intronic |
| 6  | 32526670  | G | A | rs34195497             | 1.88E-05 | 0.213 | 0.158 | 0.69 | 0.57 - 0.85 | 1.90E-03 | 0.183 | 0.135 | 0.70 | 0.54 - 0.89 | 0.59 | 5.41E-07 | HLA-DRB6                                   | ncRNA_intronic |
| 6  | 32640217  | A | G | rs23955232             | 2.32E-05 | 0.330 | 0.261 | 0.72 | 0.6 - 0.86  | 1.70E-03 | 0.294 | 0.233 | 0.73 | 0.59 - 0.89 | 0.67 | 5.45E-07 | HLA-DQB1(dist=5751), HLA-DQA2(dist=68946)  | intergenic     |
| 6  | 32505640  | G | A | rs72508471             | 1.38E-05 | 0.249 | 0.191 | 0.71 | 0.58 - 0.86 | 2.31E-03 | 0.202 | 0.149 | 0.69 | 0.55 - 0.88 | 0.61 | 5.46E-07 | HLA-DRB5(dist=7634), HLA-DRB6(dist=14850)  | intergenic     |
| 6  | 32576887  | C | T | rs9271127              | 1.38E-03 | 0.372 | 0.316 | 0.78 | 0.66 - 0.92 | 1.90E-05 | 0.361 | 0.277 | 0.68 | 0.56 - 0.82 | 0.67 | 5.49E-07 | HLA-DRB1(dist=19274), HLA-DQA1(dist=28296) | intergenic     |
| 6  | 32609634  | A | G | rs9272730              | 2.54E-05 | 0.126 | 0.186 | 0.63 | 0.5 - 0.8   | 1.56E-03 | 0.134 | 0.194 | 0.64 | 0.49 - 0.84 | 0.63 | 5.50E-07 | HLA-DQA1                                   | intronic       |
| 6  | 32608622  | G | A | rs28383419             | 3.64E-05 | 0.141 | 0.205 | 0.64 | 0.51 - 0.8  | 1.18E-03 | 0.144 | 0.207 | 0.64 | 0.49 - 0.84 | 0.65 | 5.51E-07 | HLA-DQA1                                   | intronic       |
| 6  | 32571897  | A | G | rs12211942             | 1.62E-05 | 0.145 | 0.213 | 0.63 | 0.5 - 0.79  | 2.51E-03 | 0.143 | 0.203 | 0.66 | 0.5 - 0.85  | 0.65 | 5.51E-07 | HLA-DRB1(dist=14284), HLA-DQA1(dist=33286) | intergenic     |
| 6  | 32524081  | A | G | rs143315922            | 1.54E-05 | 0.182 | 0.242 | 0.69 | 0.56 - 0.85 | 2.81E-03 | 0.180 | 0.229 | 0.74 | 0.58 - 0.94 | 0.62 | 5.52E-07 | HLA-DRB6                                   | ncRNA_intronic |
| 6  | 32609647  | T | G | rs9272732              | 2.62E-05 | 0.126 | 0.186 | 0.63 | 0.5 - 0.81  | 1.53E-03 | 0.134 | 0.194 | 0.64 | 0.49 - 0.84 | 0.63 | 5.53E-07 | HLA-DQA1                                   | intronic       |
| 6  | 32609645  | T | C | rs9272731              | 2.62E-05 | 0.126 | 0.186 | 0.63 | 0.5 - 0.81  | 1.52E-03 | 0.134 | 0.194 | 0.64 | 0.49 - 0.84 | 0.63 | 5.53E-07 | HLA-DQA1                                   | intronic       |
| 6  | 32396079  | G | A | rs75487304             | 3.31E-06 | 0.160 | 0.105 | 1.62 | 1.29 - 2.04 | 8.26E-03 | 0.142 | 0.099 | 1.51 | 1.15 - 1.98 | 1.72 | 5.54E-07 | BTNL2(dist=21172), HLA-DRA(dist=11540)     | intergenic     |
| 6  | 32527221  | G | A | rs28490365             | 8.01E-06 | 0.254 | 0.192 | 0.70 | 0.58 - 0.84 | 3.62E-03 | 0.207 | 0.157 | 0.71 | 0.56 - 0.89 | 0.62 | 5.54E-07 | HLA-DRB6                                   | ncRNA_intronic |
| 6  | 32495927  | T | G | rs112475986            | 8.82E-06 | 0.360 | 0.292 | 0.73 | 0.62 - 0.87 | 3.66E-03 | 0.273 | 0.223 | 0.76 | 0.62 - 0.94 | 0.64 | 5.55E-07 | HLA-DRB5                                   | intronic       |
| 6  | 32609652  | T | A | rs9272733              | 2.63E-05 | 0.126 | 0.185 | 0.63 | 0.5 - 0.8   | 1.53E-03 | 0.134 | 0.194 | 0.64 | 0.49 - 0.84 | 0.63 | 5.55E-07 | HLA-DQA1                                   | intronic       |
| 6  | 32482142  | T | C | rs111342235            | 2.67E-05 | 0.293 | 0.230 | 0.72 | 0.6 - 0.86  | 1.58E-03 | 0.231 | 0.175 | 0.71 | 0.56 - 0.88 | 0.63 | 5.56E-07 | HLA-DRA(dist=69316), HLA-DRB5(dist=3012)   | intergenic     |
| 6  | 32556487  | T | C | rs9270211              | 9.15E-04 | 0.312 | 0.257 | 0.76 | 0.64 - 0.91 | 2.89E-05 | 0.294 | 0.222 | 0.68 | 0.56 - 0.84 | 0.65 | 5.56E-07 | HLA-DRB1                                   | intronic       |
| 6  | 32517934  | G | A | rs386699403;rs62405645 | 2.02E-03 | 0.420 | 0.374 | 0.82 | 0.7 - 0.97  | 1.33E-05 | 0.440 | 0.353 | 0.69 | 0.58 - 0.84 | 0.66 | 5.57E-07 | HLA-DRB5(dist=19928), HLA-DRB6(dist=2556)  | intergenic     |
| 2  | 143252441 | A | G | rs55673017             | 1.74E-03 | 0.047 | 0.026 | 1.86 | 1.24 - 2.81 | 3.11E-05 | 0.063 | 0.039 | 1.67 | 1.13 - 2.47 | 2.97 | 5.58E-07 | LRP1B(dist=363171), KYNLU(dist=382754)     | intergenic     |
| 6  | 32551278  | G | C | rs9269904              | 3.36E-05 | 0.265 | 0.205 | 0.71 | 0.59 - 0.86 | 1.31E-03 | 0.212 | 0.157 | 0.69 | 0.55 - 0.87 | 0.62 | 5.59E-07 | HLA-DRB1                                   | intronic       |
| 6  | 32493460  | T | C | rs115791752            | 3.13E-05 | 0.290 | 0.227 | 0.72 | 0.6 - 0.86  | 1.40E-03 | 0.217 | 0.163 | 0.70 | 0.56 - 0.88 | 0.63 | 5.61E-07 | HLA-DRB5                                   | intronic       |
| 6  | 32514301  | C | T | rs115729463            | 1.54E-03 | 0.332 | 0.281 | 0.79 | 0.66 - 0.94 | 2.20E-05 | 0.338 | 0.256 | 0.67 | 0.55 - 0.82 | 0.66 | 5.64E-07 | HLA-DRB5(dist=16295), HLA-DRB6(dist=6189)  | intergenic     |
| 6  | 32553053  | G | C | rs9270019              | 4.22E-05 | 0.225 | 0.169 | 0.70 | 0.57 - 0.86 | 1.01E-03 | 0.206 | 0.150 | 0.68 | 0.54 - 0.86 | 0.61 | 5.65E-07 | HLA-DRB1                                   | intronic       |
| 6  | 32541581  | T | C | rs9269427              | 1.63E-03 | 0.331 | 0.278 | 0.78 | 0.65 - 0.93 | 1.77E-05 | 0.328 | 0.246 | 0.67 | 0.55 - 0.82 | 0.66 | 5.65E-07 | HLA-DRB6(dist=13802), HLA-DRB1(dist=4966)  | intergenic     |
| 6  | 32486756  | T | G | rs201764379;rs73405151 | 1.38E-05 | 0.246 | 0.186 | 0.70 | 0.58 - 0.85 | 2.69E-03 | 0.187 | 0.139 | 0.70 | 0.55 - 0.89 | 0.61 | 5.67E-07 | HLA-DRB5                                   | intronic       |
| 6  | 32460093  | T | C | rs112985748            | 5.53E-05 | 0.160 | 0.215 | 0.69 | 0.56 - 0.86 | 8.23E-04 | 0.177 | 0.243 | 0.67 | 0.53 - 0.85 | 0.63 | 5.68E-07 | HLA-DRA(dist=47267), HLA-DRB5(dist=25061)  | intergenic     |
| 6  | 32513250  | C | G | rs72844104             | 3.07E-05 | 0.273 | 0.216 | 0.73 | 0.61 - 0.88 | 1.31E-03 | 0.242 | 0.181 | 0.69 | 0.56 - 0.86 | 0.63 | 5.72E-07 | HLA-DRB5(dist=15244), HLA-DRB6(dist=7240)  | intergenic     |
| 6  | 32517398  | G | A | rs28880026             | 1.35E-06 | 0.224 | 0.162 | 0.67 | 0.55 - 0.82 | 1.16E-02 | 0.173 | 0.133 | 0.73 | 0.57 - 0.94 | 0.60 | 5.75E-07 | HLA-DRB5(dist=19392), HLA-DRB6(dist=3092)  | intergenic     |
| 6  | 32513249  | A | G | rs72844103             | 3.08E-05 | 0.273 | 0.216 | 0.73 | 0.61 - 0.88 | 1.32E-03 | 0.242 | 0.181 | 0.69 | 0.56 - 0.86 | 0.63 | 5.77E-07 | HLA-DRB5(dist=15243), HLA-DRB6(dist=7241)  | intergenic     |
| 6  | 32496295  | A | T | rs115731929            | 4.62E-05 | 0.309 | 0.247 | 0.73 | 0.61 - 0.88 | 1.01E-03 | 0.246 | 0.189 | 0.71 | 0.57 - 0.89 | 0.63 | 5.79E-07 | HLA-DRB5                                   | intronic       |
| 6  | 32607288  | G | A | rs28383381             | 3.01E-05 | 0.146 | 0.211 | 0.64 | 0.51 - 0.8  | 1.47E-03 | 0.150 | 0.213 | 0.65 | 0.5 - 0.85  | 0.65 | 5.80E-07 | HLA-DQA1                                   | intronic       |
| 6  | 32459999  | C | G | rs79054061             | 3.19E-05 | 0.172 | 0.234 | 0.68 | 0.55 - 0.84 | 1.46E-03 | 0.175 | 0.238 | 0.68 | 0.53 - 0.87 | 0.64 | 5.81E-07 | HLA-DRA(dist=47173), HLA-DRB5(dist=25155)  | intergenic     |
| 6  | 32480371  | A | G | NA                     | 8.56E-06 | 0.288 | 0.223 | 0.71 | 0.59 - 0.85 | 4.25E-03 | 0.204 | 0.157 | 0.73 | 0.58 - 0.92 | 0.62 | 5.83E-07 | HLA-DQA1(dist=3992), HLA-DQB1(dist=11820)  | intergenic     |
| 6  | 32611849  | A | C | rs9273031              | 3.26E-05 | 0.141 | 0.203 | 0.64 | 0.51 - 0.81 | 1.34E-03 | 0.148 | 0.211 | 0.65 | 0.5 - 0.84  | 0.65 | 5.86E-07 | HLA-DQA1                                   | downstream     |
| 6  | 32525868  | T | A | rs192421684            | 2.85E-05 | 0.146 | 0.200 | 0.68 | 0.55 - 0.86 | 1.61E-03 | 0.168 | 0.226 | 0.69 | 0.54 - 0.89 | 0.61 | 5.87E-07 | HLA-DRB6                                   | ncRNA_exonic   |
| 6  | 32647761  | C | T | rs28371232             | 9.14E-04 | 0.183 | 0.238 | 0.72 | 0.58 - 0.88 | 3.47E-05 | 0.145 | 0.223 | 0.59 | 0.45 - 0.77 | 0.66 | 5.88E-07 | HLA-DQB1(dist=13295), HLA-DQA2(dist=61402) | intergenic     |
| 6  | 32644305  | G | A | rs28755229             | 2.80E-03 | 0.208 | 0.256 | 0.76 | 0.62 - 0.93 | 7.79E-06 | 0.170 | 0.255 | 0.60 | 0.47 - 0.77 | 0.66 | 5.91E-07 | HLA-DQB1(dist=9839), HLA-DQA2(dist=64858)  | intergenic     |
| 20 | 62100266  | T | G | rs914467               | 1.72E-02 | 0.101 | 0.071 | 1.46 | 1.11 - 1.93 | 1.23E-06 | 0.140 | 0.093 | 1.59 | 1.21 - 2.09 | 1.97 | 5.91E-07 | KCNQ2                                      | intronic       |
| 6  | 32489766  | A | G | rs41562819             | 1.44E-06 | 0.559 | 0.480 | 0.73 | 0.62 - 0.86 | 1.26E-02 | 0.478 | 0.424 | 0.80 | 0.67 - 0.97 | 0.66 | 5.93E-07 | HLA-DRB5                                   | exonic         |
| 6  | 32502934  | A | G | rs75211336             | 5.97E-05 | 0.141 | 0.196 | 0.67 | 0.54 - 0.85 | 8.10E-04 | 0.140 | 0.202 | 0.64 | 0.49 - 0.84 | 0.63 | 5.94E-07 | HLA-DRB5(dist=4928), HLA-DRB6(dist=17556)  | intergenic     |
| 6  | 32540127  | T | C | rs9269333              | 8.12E-04 | 0.334 | 0.277 | 0.76 | 0.64 - 0.91 | 4.63E-05 | 0.330 | 0.250 | 0.68 | 0.55 - 0.83 | 0.67 | 5.97E-07 | HLA-DRB6(dist=12348), HLA-DRB1(dist=6420)  | intergenic     |
| 6  | 32608417  | G | A | rs28383413             | 2.90E-05 | 0.144 | 0.209 | 0.64 | 0.51 - 0.8  | 1.57E-03 | 0.148 | 0.211 | 0.65 | 0.5 - 0.84  | 0.66 | 5.97E-07 | HLA-DQA1                                   | intronic       |
| 6  | 32539590  | A | G | rs9269306              | 5.42E-03 | 0.409 | 0.364 | 0.83 | 0.7 - 0.98  | 2.13E-06 | 0.393 | 0.307 | 0.68 | 0.56 - 0.83 | 0.65 | 5.98E-07 | HLA-DRB6(dist=11811), HLA-DRB1(dist=6957)  | intergenic     |
| 6  | 32482278  | C | G | rs116082814            | 8.13E-06 | 0.354 | 0.284 | 0.73 | 0.61 - 0.86 | 4.33E-03 | 0.    |       |      |             |      |          |                                            |                |

|   |          |   |   |                       |          |       |       |      |      |       |          |       |       |      |      |       |      |          |                                            |                |
|---|----------|---|---|-----------------------|----------|-------|-------|------|------|-------|----------|-------|-------|------|------|-------|------|----------|--------------------------------------------|----------------|
| 6 | 32454744 | C | T | rs145704749           | 3.76E-05 | 0.307 | 0.245 | 0.73 | 0.61 | -0.88 | 1.25E-03 | 0.270 | 0.211 | 0.72 | 0.58 | -0.89 | 0.64 | 6.10E-07 | HLA-DRA(dist=41918), HLA-DRB5(dist=30410)  | intergenic     |
| 6 | 32553751 | T | C | rs9270051             | 5.29E-05 | 0.233 | 0.177 | 0.71 | 0.58 | -0.86 | 9.01E-04 | 0.210 | 0.153 | 0.68 | 0.54 | -0.86 | 0.62 | 6.11E-07 | HLA-DRB1                                   | intronic       |
| 6 | 32610134 | G | A | rs75076975            | 3.51E-05 | 0.140 | 0.203 | 0.64 | 0.51 | -0.8  | 1.34E-03 | 0.148 | 0.211 | 0.65 | 0.5  | -0.84 | 0.65 | 6.14E-07 | HLA-DQA1                                   | intronic       |
| 6 | 32502517 | C | T | rs77697582            | 5.45E-05 | 0.145 | 0.201 | 0.67 | 0.54 | -0.85 | 9.19E-04 | 0.142 | 0.203 | 0.65 | 0.5  | -0.84 | 0.63 | 6.15E-07 | HLA-DRB5(dist=4511), HLA-DRB6(dist=17973)  | intergenic     |
| 6 | 32519005 | C | T | rs28490179            | 2.50E-06 | 0.233 | 0.172 | 0.68 | 0.56 | -0.83 | 7.63E-03 | 0.211 | 0.165 | 0.74 | 0.59 | -0.93 | 0.61 | 6.17E-07 | HLA-DRB5(dist=20999), HLA-DRB6(dist=1485)  | intergenic     |
| 6 | 32607320 | A | C | rs28383382            | 3.27E-05 | 0.146 | 0.210 | 0.64 | 0.51 | -0.8  | 1.46E-03 | 0.149 | 0.212 | 0.65 | 0.5  | -0.84 | 0.65 | 6.19E-07 | HLA-DQA1                                   | intronic       |
| 6 | 32543687 | G | T | rs9269526             | 3.19E-04 | 0.383 | 0.436 | 0.80 | 0.68 | -0.95 | 2.00E-07 | 0.380 | 0.477 | 0.67 | 0.55 | -0.81 | 0.53 | 6.20E-07 | HLA-DRB6(dist=15908), HLA-DRB1(dist=2860)  | intergenic     |
| 6 | 32489214 | G | T | rs116370429           | 1.98E-05 | 0.296 | 0.232 | 0.72 | 0.6  | -0.86 | 2.24E-03 | 0.203 | 0.151 | 0.70 | 0.55 | -0.88 | 0.63 | 6.25E-07 | HLA-DRB5                                   | intronic       |
| 6 | 32502447 | A | C | rs74816744            | 1.26E-05 | 0.272 | 0.212 | 0.72 | 0.6  | -0.87 | 2.96E-03 | 0.203 | 0.152 | 0.70 | 0.56 | -0.89 | 0.62 | 6.25E-07 | HLA-DRB5(dist=4441), HLA-DRB6(dist=18043)  | intergenic     |
| 6 | 32485294 | T | A | rs1137470             | 1.11E-05 | 0.363 | 0.296 | 0.74 | 0.62 | -0.88 | 3.60E-03 | 0.266 | 0.213 | 0.75 | 0.6  | -0.92 | 0.64 | 6.28E-07 | HLA-DRB5(NM_002125:c.*222A>T)              | UTR3           |
| 6 | 32611898 | A | C | rs9273036             | 3.60E-05 | 0.139 | 0.202 | 0.64 | 0.51 | -0.8  | 1.33E-03 | 0.148 | 0.211 | 0.65 | 0.5  | -0.84 | 0.65 | 6.30E-07 | HLA-DQA1                                   | downstream     |
| 6 | 32551698 | T | C | rs9269930             | 7.11E-04 | 0.355 | 0.301 | 0.78 | 0.66 | -0.93 | 5.76E-05 | 0.336 | 0.263 | 0.70 | 0.58 | -0.86 | 0.65 | 6.32E-07 | HLA-DRB1                                   | intronic       |
| 6 | 32507539 | C | G | rs71534510            | 1.98E-05 | 0.268 | 0.206 | 0.71 | 0.59 | -0.86 | 2.23E-03 | 0.208 | 0.155 | 0.70 | 0.55 | -0.88 | 0.63 | 6.32E-07 | HLA-DRB5(dist=9533), HLA-DRB6(dist=12951)  | intergenic     |
| 6 | 32507310 | C | C | rs112959132           | 3.94E-06 | 0.299 | 0.231 | 0.71 | 0.59 | -0.85 | 6.93E-03 | 0.243 | 0.196 | 0.76 | 0.61 | -0.94 | 0.63 | 6.33E-07 | HLA-DRB5(dist=9304), HLA-DRB6(dist=13180)  | intergenic     |
| 6 | 32525270 | T | C | rs28615351            | 1.64E-05 | 0.294 | 0.232 | 0.73 | 0.61 | -0.87 | 2.55E-03 | 0.230 | 0.177 | 0.72 | 0.57 | -0.9  | 0.63 | 6.35E-07 | HLA-DRB6                                   | ncRNA_intronic |
| 6 | 32647701 | T | A | rs3129780             | 1.12E-05 | 0.552 | 0.469 | 0.72 | 0.61 | -0.85 | 3.41E-03 | 0.565 | 0.493 | 0.75 | 0.62 | -0.91 | 0.70 | 6.35E-07 | HLA-DQB1(dist=13235), HLA-DQA2(dist=61462) | intergenic     |
| 6 | 32644135 | G | A | rs28755216            | 1.57E-03 | 0.207 | 0.259 | 0.75 | 0.61 | -0.91 | 1.90E-05 | 0.163 | 0.242 | 0.61 | 0.48 | -0.78 | 0.66 | 6.37E-07 | HLA-DQB1(dist=9669), HLA-DQA2(dist=65028)  | intergenic     |
| 6 | 32482279 | A | G | rs114716760           | 6.64E-06 | 0.344 | 0.274 | 0.72 | 0.61 | -0.86 | 5.47E-03 | 0.299 | 0.247 | 0.77 | 0.63 | -0.94 | 0.64 | 6.41E-07 | HLA-DRA(dist=69453), HLA-DRB5(dist=2875)   | intergenic     |
| 6 | 32604642 | A | G | rs9272368;rs386699536 | 8.32E-04 | 0.123 | 0.167 | 0.70 | 0.55 | -0.89 | 5.81E-05 | 0.135 | 0.208 | 0.60 | 0.46 | -0.78 | 0.62 | 6.42E-07 | HLA-DQA1                                   | upstream       |
| 6 | 32505394 | G | A | rs71534503            | 1.10E-05 | 0.258 | 0.197 | 0.70 | 0.58 | -0.85 | 3.42E-03 | 0.202 | 0.151 | 0.71 | 0.56 | -0.89 | 0.62 | 6.42E-07 | HLA-DRB5(dist=7388), HLA-DRB6(dist=15096)  | intergenic     |
| 6 | 32543048 | G | C | rs9269495             | 2.98E-05 | 0.232 | 0.175 | 0.70 | 0.58 | -0.86 | 1.65E-03 | 0.199 | 0.150 | 0.71 | 0.56 | -0.9  | 0.60 | 6.47E-07 | HLA-DRB6(dist=15269), HLA-DRB1(dist=3499)  | intronic       |
| 6 | 32607950 | G | A | rs28383400            | 1.14E-03 | 0.239 | 0.297 | 0.75 | 0.62 | -0.9  | 3.16E-05 | 0.201 | 0.288 | 0.62 | 0.49 | -0.78 | 0.68 | 6.51E-07 | HLA-DQA1                                   | intergenic     |
| 6 | 32608108 | C | T | rs28383405            | 3.13E-05 | 0.142 | 0.206 | 0.64 | 0.51 | -0.8  | 1.58E-03 | 0.148 | 0.211 | 0.65 | 0.5  | -0.85 | 0.65 | 6.51E-07 | HLA-DQA1                                   | intronic       |
| 6 | 32460798 | G | C | rs113534515           | 3.11E-05 | 0.319 | 0.255 | 0.73 | 0.61 | -0.87 | 1.67E-03 | 0.246 | 0.192 | 0.73 | 0.58 | -0.9  | 0.64 | 6.52E-07 | HLA-DRA(dist=47972), HLA-DRB5(dist=24356)  | intergenic     |
| 6 | 32597538 | C | G | rs3104385             | 2.84E-05 | 0.179 | 0.247 | 0.67 | 0.54 | -0.82 | 1.86E-03 | 0.161 | 0.223 | 0.67 | 0.52 | -0.86 | 0.66 | 6.54E-07 | HLA-DRB1(dist=39925), HLA-DQA1(dist=7645)  | intergenic     |
| 6 | 32474975 | G | A | rs146824203           | 6.74E-06 | 0.235 | 0.304 | 0.70 | 0.58 | -0.85 | 5.91E-03 | 0.251 | 0.309 | 0.75 | 0.61 | -0.93 | 0.65 | 6.58E-07 | HLA-DRA(dist=62149), HLA-DRB5(dist=10179)  | intergenic     |
| 6 | 32608707 | T | C | rs28383420            | 3.48E-05 | 0.138 | 0.201 | 0.64 | 0.51 | -0.8  | 1.47E-03 | 0.143 | 0.204 | 0.65 | 0.5  | -0.85 | 0.65 | 6.60E-07 | HLA-DQA1                                   | intronic       |
| 6 | 32518996 | T | G | rs80250300            | 4.10E-05 | 0.115 | 0.167 | 0.65 | 0.51 | -0.83 | 1.28E-03 | 0.124 | 0.181 | 0.64 | 0.48 | -0.85 | 0.61 | 6.61E-07 | HLA-DRB5(dist=20990), HLA-DRB6(dist=1494)  | intergenic     |
| 6 | 32485397 | G | A | rs112749594           | 2.23E-05 | 0.350 | 0.284 | 0.74 | 0.62 | -0.88 | 2.19E-03 | 0.248 | 0.194 | 0.73 | 0.59 | -0.91 | 0.64 | 6.62E-07 | HLA-DRB5                                   | UTR3           |
| 6 | 32551197 | C | T | rs9269902             | 4.70E-05 | 0.239 | 0.184 | 0.72 | 0.59 | -0.87 | 1.12E-03 | 0.207 | 0.153 | 0.69 | 0.55 | -0.88 | 0.61 | 6.63E-07 | HLA-DRB1                                   | intronic       |
| 6 | 32608856 | C | T | rs28383431            | 2.65E-05 | 0.143 | 0.207 | 0.64 | 0.51 | -0.8  | 1.95E-03 | 0.140 | 0.200 | 0.65 | 0.5  | -0.85 | 0.65 | 6.64E-07 | HLA-DQA1                                   | intronic       |
| 6 | 32607973 | G | A | rs28383401            | 2.97E-05 | 0.144 | 0.209 | 0.64 | 0.51 | -0.8  | 1.73E-03 | 0.149 | 0.212 | 0.66 | 0.51 | -0.85 | 0.66 | 6.69E-07 | HLA-DQA1                                   | intronic       |
| 6 | 32502393 | G | T | rs77314213            | 1.87E-05 | 0.254 | 0.193 | 0.71 | 0.58 | -0.85 | 2.42E-03 | 0.201 | 0.149 | 0.70 | 0.55 | -0.88 | 0.62 | 6.70E-07 | HLA-DRB5(dist=4387), HLA-DRB6(dist=18097)  | intergenic     |
| 6 | 32493485 | C | T | rs114034929           | 4.42E-05 | 0.281 | 0.218 | 0.72 | 0.6  | -0.86 | 1.25E-03 | 0.216 | 0.162 | 0.70 | 0.56 | -0.88 | 0.63 | 6.76E-07 | HLA-DRB5                                   | intronic       |
| 6 | 32553117 | T | G | rs9270021             | 4.49E-05 | 0.225 | 0.169 | 0.70 | 0.57 | -0.86 | 1.16E-03 | 0.206 | 0.151 | 0.69 | 0.54 | -0.87 | 0.62 | 6.78E-07 | HLA-DRB1                                   | intronic       |
| 6 | 32608844 | A | G | rs28383429            | 2.71E-05 | 0.143 | 0.207 | 0.64 | 0.51 | -0.8  | 1.96E-03 | 0.140 | 0.200 | 0.65 | 0.5  | -0.85 | 0.65 | 6.80E-07 | HLA-DQA1                                   | intronic       |
| 6 | 32459175 | T | G | rs186920750           | 4.56E-06 | 0.282 | 0.347 | 0.74 | 0.62 | -0.89 | 6.29E-03 | 0.348 | 0.406 | 0.78 | 0.64 | -0.95 | 0.65 | 6.82E-07 | HLA-DRA(dist=46349), HLA-DRB5(dist=25979)  | intergenic     |
| 6 | 32525850 | T | C | rs57583084            | 2.36E-05 | 0.280 | 0.219 | 0.72 | 0.6  | -0.87 | 2.08E-03 | 0.214 | 0.159 | 0.70 | 0.55 | -0.88 | 0.63 | 6.82E-07 | HLA-DRB6                                   | ncRNA_exonic   |
| 6 | 32537950 | C | T | rs113947393           | 2.38E-03 | 0.390 | 0.339 | 0.80 | 0.68 | -0.95 | 1.28E-05 | 0.347 | 0.263 | 0.67 | 0.55 | -0.82 | 0.66 | 6.84E-07 | HLA-DRB6(dist=10171), HLA-DRB1(dist=8597)  | intergenic     |
| 6 | 32506993 | G | A | rs74500484            | 2.05E-05 | 0.246 | 0.188 | 0.71 | 0.59 | -0.86 | 2.35E-03 | 0.195 | 0.145 | 0.67 | 0.55 | -0.89 | 0.61 | 6.85E-07 | HLA-DRB5(dist=8987), HLA-DRB6(dist=13497)  | intergenic     |
| 6 | 32513377 | C | T | rs66717749            | 4.96E-05 | 0.266 | 0.212 | 0.74 | 0.62 | -0.9  | 1.03E-03 | 0.243 | 0.182 | 0.69 | 0.55 | -0.86 | 0.63 | 6.87E-07 | HLA-DRB5(dist=15371), HLA-DRB6(dist=7113)  | intergenic     |
| 6 | 32518296 | A | G | rs147613123           | 2.47E-03 | 0.396 | 0.344 | 0.80 | 0.67 | -0.94 | 1.12E-05 | 0.399 | 0.310 | 0.68 | 0.56 | -0.82 | 0.67 | 6.87E-07 | HLA-DRB5(dist=20290), HLA-DRB6(dist=2194)  | intergenic     |
| 6 | 32545385 | G | A | rs35517695            | 4.27E-05 | 0.113 | 0.165 | 0.65 | 0.5  | -0.83 | 1.33E-03 | 0.112 | 0.165 | 0.64 | 0.48 | -0.86 | 0.60 | 6.88E-07 | HLA-DRB6(dist=17606), HLA-DRB1(dist=1162)  | intergenic     |
| 6 | 32551058 | A | T | rs9269893             | 2.50E-05 | 0.296 | 0.234 | 0.72 | 0.6  | -0.87 | 2.10E-03 | 0.220 | 0.167 | 0.71 | 0.57 | -0.89 | 0.63 | 6.88E-07 | HLA-DRB1                                   | intronic       |
| 6 | 32551010 | G | A | rs9269890             | 1.10E-03 | 0.371 | 0.316 | 0.78 | 0.66 | -0.93 | 3.15E-05 | 0.316 | 0.241 | 0.69 | 0.56 | -0.84 | 0.66 | 6.90E-07 | HLA-DRB1                                   | intronic       |
| 6 | 32609181 | C | T | rs1129765             | 1.47E-05 | 0.129 | 0.193 | 0.62 | 0.49 | -0.78 | 3.20E-03 | 0.136 | 0.191 | 0.67 | 0.51 | -0.87 | 0.64 | 6.91E-07 | HLA-DQA1                                   | exonic         |
| 6 | 32502455 | C | G | rs79076719            | 1.44E-05 | 0.259 | 0.199 | 0.71 | 0.59 | -0.86 | 2.96E-03 | 0.203 | 0.152 | 0.70 | 0.56 | -0.89 | 0.62 | 7.00E-07 | HLA-DRB5(dist=4449), HLA-DRB6(dist=18035)  | intergenic     |
| 6 | 32478155 | C | T | rs150595381           | 3.26E-08 | 0.309 | 0.396 | 0.68 | 0.57 | -0.81 | 1.23E-01 | 0.339 | 0.374 | 0.86 | 0.71 | -1.05 | 0.66 | 7.02E-07 | HLA-DRA(dist=65329), HLA-DRB5(dist=6999)   | intergenic     |
| 6 | 32506942 | C | T | rs76539678            | 3.56E-05 | 0.280 | 0.222 | 0.73 | 0.61 | -0.88 | 1.53E-03 | 0.224 | 0.169 | 0.70 | 0.56 | -0.88 | 0.63 | 7.08E-07 | HLA-DRB5(dist=8936), HLA-DRB6(dist=13548)  | intergenic     |
| 6 | 32579365 | C | T | rs9271222             | 3.21E-06 | 0.234 | 0.167 | 0.66 | 0.54 | -0.8  | 9.72E-03 | 0.191 | 0.147 | 0.73 | 0.58 | -0.93 | 0.62 | 7.12E-07 | HLA-DRB1(dist=21752), HLA-DQA1(dist=25818) | intergenic     |
| 6 | 32608035 | T | C | rs28383403            | 3.52E-05 | 0.144 | 0.208 | 0.64 | 0.51 | -0.8  | 1.59E-03 | 0.148 | 0.210 | 0.65 | 0.5  | -0.85 | 0.66 | 7.13E-07 | HLA-DQA1                                   | intronic       |
| 6 | 32608792 | A | T | rs28383427            | 3.77E-05 | 0.139 | 0.202 | 0.64 | 0.51 | -0.81 | 1.47E-03 | 0.148 | 0.211 | 0.65 | 0.5  | -0.84 | 0.65 | 7.16E-07 | HLA-DQA1                                   | intronic       |
| 6 | 32505433 | C | T | rs71534504            | 9.87E-06 | 0.255 | 0.194 | 0.70 | 0.58 | -0.85 | 4.15E-03 | 0.201 | 0.152 | 0.71 | 0.56 | -0.9  | 0.62 | 7.17E-07 | HLA-DRB5(dist=7427), HLA-DRB6(dist=15057)  | intergenic     |
| 6 | 32576064 | G | C | rs482044              | 4.59E-05 | 0.258 | 0.334 | 0.69 | 0.58 | -0.83 | 1.27E-03 | 0.259 | 0.335 | 0.69 | 0.56 | -0.86 | 0.70 | 7.17E-07 | HLA-DRB1(dist=18451), HLA-DQA1(dist=29119) | intergenic     |
| 6 | 32668439 | A | C | rs3135002             | 4.37E-05 | 0.296 | 0.227 | 0.70 | 0.58 | -0.84 | 1.33E-03 | 0.288 | 0.226 | 0.72 | 0.58 | -0.89 | 0.67 | 7.17E-07 | HLA-DQB1(dist=33973), HLA-DQA2(dist=40724) | intergenic     |
| 6 | 32547015 | G | C | rs34261587            | 3.85E-05 | 0.094 | 0.145 | 0.61 | 0.46 | -0.8  | 1.44E-03 | 0.108 | 0.163 | 0.63 | 0.46 | -0.84 | 0.60 | 7.19E-07 | HLA-DRB1                                   | intronic       |
| 6 | 32543594 | T | C | rs9269518             | 1.86E-03 | 0.316 | 0.267 | 0.79 | 0.66 | -0.94 | 2.15E-05 | 0.320 |       |      |      |       |      |          |                                            |                |



|    |          |   |   |                        |          |       |       |      |      |       |          |       |       |      |      |       |      |          |                                            |                |
|----|----------|---|---|------------------------|----------|-------|-------|------|------|-------|----------|-------|-------|------|------|-------|------|----------|--------------------------------------------|----------------|
| 6  | 32565745 | G | A | rs386699425;rs9270644  | 2.35E-03 | 0.358 | 0.303 | 0.78 | 0.66 | -0.93 | 1.20E-05 | 0.369 | 0.284 | 0.68 | 0.56 | -0.82 | 0.68 | 7.45E-07 | HLA-DRB1(dist=8132), HLA-DQA1(dist=39438)  | intergenic     |
| 6  | 32588831 | G | A | rs9271480              | 4.86E-05 | 0.149 | 0.214 | 0.64 | 0.51 | -0.8  | 1.29E-03 | 0.143 | 0.206 | 0.64 | 0.49 | -0.84 | 0.66 | 7.48E-07 | HLA-DRB1(dist=31218), HLA-DQA1(dist=16352) | intergenic     |
| 2  | 45117101 | C | G | rs80027008             | 1.72E-02 | 0.072 | 0.054 | 1.35 | 0.97 | -1.86 | 6.00E-07 | 0.094 | 0.045 | 2.21 | 1.59 | -3.07 | 2.16 | 7.49E-07 | CAMKMT(dist=117370), SIX3-AS1(dist=50192)  | intergenic     |
| 6  | 32460050 | T | A | rs77532237             | 4.53E-05 | 0.158 | 0.215 | 0.68 | 0.55 | -0.85 | 1.36E-03 | 0.170 | 0.232 | 0.68 | 0.53 | -0.87 | 0.64 | 7.50E-07 | HLA-DRA(dist=47224), HLA-DRB5(dist=25104)  | intergenic     |
| 6  | 32632287 | A | G | rs9274336              | 4.04E-05 | 0.537 | 0.462 | 0.74 | 0.63 | -0.87 | 1.41E-03 | 0.478 | 0.406 | 0.75 | 0.62 | -0.9  | 0.70 | 7.52E-07 | HLA-DQB1                                   | intronic       |
| 6  | 32556332 | T | G | rs35840159             | 1.80E-05 | 0.084 | 0.132 | 0.60 | 0.45 | -0.8  | 3.31E-03 | 0.078 | 0.118 | 0.63 | 0.45 | -0.89 | 0.55 | 7.54E-07 | HLA-DRB1                                   | intronic       |
| 6  | 32505330 | T | G | rs77430390             | 1.95E-05 | 0.254 | 0.194 | 0.71 | 0.59 | -0.86 | 2.61E-03 | 0.205 | 0.153 | 0.70 | 0.55 | -0.88 | 0.62 | 7.64E-07 | HLA-DRB5(dist=7324), HLA-DRB6(dist=15160)  | intergenic     |
| 6  | 32484828 | G | A | rs18268396             | 7.85E-06 | 0.341 | 0.410 | 0.75 | 0.63 | -0.89 | 5.39E-03 | 0.434 | 0.492 | 0.79 | 0.66 | -0.96 | 0.66 | 7.66E-07 | HLA-DRB5                                   | downstream     |
| 6  | 32587846 | C | T | rs9271419              | 5.53E-05 | 0.270 | 0.348 | 0.69 | 0.58 | -0.83 | 1.17E-03 | 0.264 | 0.341 | 0.69 | 0.56 | -0.86 | 0.71 | 7.70E-07 | HLA-DRB1(dist=30233), HLA-DQA1(dist=17337) | intergenic     |
| 6  | 32522890 | G | A | rs36215042             | 6.44E-06 | 0.231 | 0.172 | 0.69 | 0.57 | -0.84 | 5.38E-03 | 0.192 | 0.145 | 0.71 | 0.56 | -0.91 | 0.61 | 7.78E-07 | HLA-DRB6                                   | ncRNA_intronic |
| 6  | 32610255 | G | A | rs9272774              | 3.92E-05 | 0.129 | 0.189 | 0.64 | 0.5  | -0.81 | 1.48E-03 | 0.147 | 0.209 | 0.65 | 0.5  | -0.84 | 0.65 | 7.80E-07 | HLA-DQA1                                   | intronic       |
| 6  | 32593926 | T | C | rs9271755              | 5.83E-05 | 0.132 | 0.191 | 0.64 | 0.51 | -0.81 | 1.12E-03 | 0.142 | 0.203 | 0.65 | 0.5  | -0.84 | 0.65 | 7.81E-07 | HLA-DRB1(dist=36313), HLA-DQA1(dist=11257) | intergenic     |
| 6  | 32644915 | A | G | rs28755255             | 1.47E-03 | 0.191 | 0.241 | 0.74 | 0.6  | -0.91 | 2.98E-05 | 0.178 | 0.260 | 0.62 | 0.48 | -0.78 | 0.66 | 7.83E-07 | HLA-DQB1(dist=10449), HLA-DQA2(dist=64248) | intergenic     |
| 6  | 32473911 | A | G | rs79934186             | 6.18E-08 | 0.505 | 0.419 | 0.71 | 0.6  | -0.83 | 8.88E-02 | 0.392 | 0.354 | 0.85 | 0.7  | -1.03 | 0.66 | 7.84E-07 | HLA-DRA(dist=61085), HLA-DRB5(dist=11243)  | intergenic     |
| 6  | 32520460 | C | T | rs113521434            | 6.18E-05 | 0.116 | 0.165 | 0.66 | 0.52 | -0.85 | 1.04E-03 | 0.125 | 0.184 | 0.63 | 0.48 | -0.83 | 0.61 | 7.88E-07 | HLA-DRB6                                   | downstream     |
| 6  | 32456573 | C | T | rs79175537             | 2.38E-05 | 0.382 | 0.447 | 0.76 | 0.65 | -0.9  | 2.41E-03 | 0.549 | 0.485 | 0.77 | 0.64 | -0.93 | 0.67 | 7.89E-07 | HLA-DRA(dist=43747), HLA-DRB5(dist=28581)  | intergenic     |
| 6  | 32608473 | G | A | rs28383415             | 3.15E-05 | 0.141 | 0.204 | 0.64 | 0.51 | -0.8  | 1.97E-03 | 0.142 | 0.202 | 0.65 | 0.5  | -0.85 | 0.65 | 7.89E-07 | HLA-DQA1                                   | intronic       |
| 6  | 32572048 | G | T | rs585305               | 2.00E-05 | 0.150 | 0.219 | 0.63 | 0.51 | -0.79 | 3.09E-03 | 0.146 | 0.205 | 0.66 | 0.51 | -0.86 | 0.66 | 7.91E-07 | HLA-DRB1(dist=14435), HLA-DQA1(dist=33135) | intergenic     |
| 21 | 19668943 | T | C | rs56051401             | 1.47E-02 | 0.067 | 0.046 | 1.49 | 1.06 | -2.09 | 2.84E-06 | 0.102 | 0.062 | 1.72 | 1.26 | -2.36 | 2.29 | 7.92E-07 | TMPRSS15                                   | intronic       |
| 6  | 32556338 | C | G | rs35399335             | 2.35E-05 | 0.083 | 0.131 | 0.60 | 0.45 | -0.8  | 2.75E-03 | 0.077 | 0.118 | 0.62 | 0.44 | -0.88 | 0.55 | 7.95E-07 | HLA-DRB1                                   | intronic       |
| 6  | 32492228 | T | C | rs76302731             | 2.18E-05 | 0.101 | 0.152 | 0.62 | 0.48 | -0.81 | 2.57E-03 | 0.114 | 0.165 | 0.65 | 0.49 | -0.87 | 0.59 | 7.95E-07 | HLA-DRB5                                   | intronic       |
| 6  | 32486953 | A | C | rs150596400            | 5.56E-06 | 0.355 | 0.287 | 0.73 | 0.61 | -0.87 | 7.48E-03 | 0.282 | 0.233 | 0.77 | 0.63 | -0.95 | 0.64 | 7.98E-07 | HLA-DRB5                                   | intronic       |
| 6  | 32553531 | C | G | rs9270041              | 5.44E-05 | 0.228 | 0.172 | 0.71 | 0.58 | -0.86 | 1.17E-03 | 0.207 | 0.152 | 0.69 | 0.54 | -0.87 | 0.62 | 7.99E-07 | HLA-DRB1                                   | intronic       |
| 6  | 32611737 | T | C | rs9273022              | 4.13E-05 | 0.143 | 0.205 | 0.65 | 0.51 | -0.81 | 1.53E-03 | 0.149 | 0.212 | 0.65 | 0.5  | -0.84 | 0.66 | 8.01E-07 | HLA-DQA1                                   | downstream     |
| 6  | 32567506 | C | G | rs386699445;rs9270717  | 4.91E-05 | 0.233 | 0.171 | 0.68 | 0.56 | -0.83 | 1.35E-03 | 0.215 | 0.158 | 0.68 | 0.54 | -0.86 | 0.64 | 8.03E-07 | HLA-DRB1(dist=9893), HLA-DQA1(dist=37677)  | intergenic     |
| 6  | 32457005 | G | C | rs74820711             | 3.64E-05 | 0.368 | 0.432 | 0.76 | 0.65 | -0.9  | 1.70E-03 | 0.417 | 0.484 | 0.76 | 0.63 | -0.92 | 0.67 | 8.03E-07 | HLA-DRA(dist=44179), HLA-DRB5(dist=28149)  | intergenic     |
| 6  | 32495746 | C | T | rs146711239            | 1.59E-05 | 0.395 | 0.328 | 0.75 | 0.63 | -0.88 | 3.48E-03 | 0.334 | 0.280 | 0.78 | 0.64 | -0.95 | 0.65 | 8.08E-07 | HLA-DRB5                                   | intronic       |
| 6  | 32611650 | G | A | rs9273014              | 4.98E-05 | 0.153 | 0.218 | 0.65 | 0.52 | -0.81 | 1.36E-03 | 0.149 | 0.213 | 0.65 | 0.5  | -0.84 | 0.66 | 8.11E-07 | HLA-DQA1                                   | downstream     |
| 6  | 32541275 | C | T | rs9269394              | 8.58E-04 | 0.383 | 0.325 | 0.78 | 0.66 | -0.92 | 6.09E-05 | 0.350 | 0.272 | 0.69 | 0.57 | -0.85 | 0.67 | 8.17E-07 | HLA-DRB6(dist=13496), HLA-DRB1(dist=5272)  | intergenic     |
| 6  | 32559934 | A | G | rs28366270             | 5.42E-05 | 0.131 | 0.191 | 0.64 | 0.51 | -0.81 | 1.30E-03 | 0.117 | 0.175 | 0.62 | 0.47 | -0.83 | 0.64 | 8.20E-07 | HLA-DRB1(dist=2321), HLA-DQA1(dist=45249)  | intergenic     |
| 6  | 32608483 | T | C | rs28383416             | 3.29E-05 | 0.141 | 0.204 | 0.64 | 0.51 | -0.8  | 1.98E-03 | 0.142 | 0.202 | 0.65 | 0.5  | -0.85 | 0.65 | 8.21E-07 | HLA-DQA1                                   | intronic       |
| 6  | 32552206 | G | T | rs9269963              | 4.33E-05 | 0.254 | 0.196 | 0.71 | 0.59 | -0.86 | 1.50E-03 | 0.210 | 0.155 | 0.69 | 0.55 | -0.87 | 0.63 | 8.23E-07 | HLA-DRB1                                   | intronic       |
| 6  | 32605982 | T | G | rs9272486              | 4.52E-05 | 0.147 | 0.211 | 0.64 | 0.51 | -0.81 | 1.50E-03 | 0.149 | 0.212 | 0.65 | 0.5  | -0.84 | 0.66 | 8.24E-07 | HLA-DQA1                                   | intronic       |
| 6  | 32559131 | G | A | rs34127991             | 3.62E-05 | 0.106 | 0.161 | 0.62 | 0.48 | -0.8  | 1.80E-03 | 0.122 | 0.179 | 0.64 | 0.48 | -0.85 | 0.62 | 8.26E-07 | HLA-DRB1(dist=1518), HLA-DQA1(dist=46052)  | intergenic     |
| 6  | 32480380 | C | T | rs78438144             | 2.43E-05 | 0.293 | 0.231 | 0.72 | 0.6  | -0.87 | 2.54E-03 | 0.220 | 0.169 | 0.72 | 0.57 | -0.9  | 0.64 | 8.27E-07 | HLA-DRA(dist=67554), HLA-DRB5(dist=4774)   | intergenic     |
| 6  | 32517989 | C | T | rs74636204             | 5.79E-05 | 0.114 | 0.165 | 0.65 | 0.51 | -0.83 | 1.20E-03 | 0.120 | 0.177 | 0.64 | 0.48 | -0.85 | 0.61 | 8.29E-07 | HLA-DRB5(dist=19983), HLA-DRB6(dist=2501)  | intergenic     |
| 13 | 94189890 | C | T | rs112391158            | 2.99E-06 | 0.060 | 0.029 | 2.13 | 1.47 | -3.1  | 4.33E-02 | 0.054 | 0.039 | 1.40 | 0.92 | -2.12 | 2.81 | 8.32E-07 | GPC6                                       | intronic       |
| 6  | 32504015 | A | G | rs67894469             | 2.37E-05 | 0.210 | 0.165 | 0.71 | 0.58 | -0.87 | 2.18E-03 | 0.194 | 0.143 | 0.70 | 0.55 | -0.88 | 0.60 | 8.32E-07 | HLA-DRB5(dist=6009), HLA-DRB6(dist=16475)  | intergenic     |
| 6  | 32606846 | G | A | rs28383361             | 3.34E-05 | 0.140 | 0.202 | 0.64 | 0.51 | -0.81 | 1.99E-03 | 0.146 | 0.206 | 0.66 | 0.51 | -0.86 | 0.65 | 8.35E-07 | HLA-DQA1                                   | intronic       |
| 6  | 32470194 | C | A | rs75684729             | 1.50E-05 | 0.222 | 0.286 | 0.71 | 0.59 | -0.86 | 4.30E-03 | 0.229 | 0.286 | 0.74 | 0.6  | -0.93 | 0.65 | 8.37E-07 | HLA-DRA(dist=57368), HLA-DRB5(dist=14960)  | intergenic     |
| 6  | 32567491 | G | T | rs9270715              | 5.60E-05 | 0.235 | 0.174 | 0.68 | 0.56 | -0.83 | 1.25E-03 | 0.219 | 0.162 | 0.69 | 0.55 | -0.86 | 0.64 | 8.37E-07 | HLA-DRB1(dist=9878), HLA-DQA1(dist=37692)  | intergenic     |
| 6  | 32456511 | C | G | rs201438714;rs75432211 | 1.47E-05 | 0.372 | 0.439 | 0.76 | 0.64 | -0.89 | 3.69E-03 | 0.552 | 0.490 | 0.78 | 0.65 | -0.94 | 0.67 | 8.40E-07 | HLA-DRA(dist=43685), HLA-DRB5(dist=28643)  | intergenic     |
| 6  | 32501664 | A | G | rs34481656             | 5.50E-05 | 0.127 | 0.180 | 0.66 | 0.52 | -0.84 | 1.30E-03 | 0.126 | 0.182 | 0.65 | 0.49 | -0.86 | 0.62 | 8.43E-07 | HLA-DRB5(dist=3658), HLA-DRB6(dist=18826)  | intergenic     |
| 6  | 32605646 | T | G | rs9272463              | 4.95E-05 | 0.147 | 0.211 | 0.64 | 0.51 | -0.81 | 1.42E-03 | 0.149 | 0.212 | 0.65 | 0.5  | -0.84 | 0.66 | 8.44E-07 | HLA-DQA1                                   | intronic       |
| 6  | 32512766 | C | T | rs67216854             | 1.70E-07 | 0.290 | 0.216 | 0.68 | 0.56 | -0.81 | 4.54E-02 | 0.229 | 0.193 | 0.81 | 0.64 | -1.01 | 0.63 | 8.46E-07 | HLA-DRB5(dist=14760), HLA-DRB6(dist=7724)  | intergenic     |
| 6  | 32484729 | T | C | rs62405577             | 1.10E-05 | 0.427 | 0.497 | 0.75 | 0.64 | -0.89 | 4.55E-03 | 0.497 | 0.435 | 0.78 | 0.65 | -0.94 | 0.67 | 8.49E-07 | HLA-DRB5                                   | downstream     |
| 6  | 32538319 | T | C | rs73726853             | 4.62E-05 | 0.243 | 0.188 | 0.72 | 0.59 | -0.87 | 1.43E-03 | 0.206 | 0.152 | 0.69 | 0.55 | -0.88 | 0.61 | 8.54E-07 | HLA-DRB6(dist=10540), HLA-DRB1(dist=8228)  | intergenic     |
| 6  | 32459626 | C | T | rs71545424             | 1.90E-05 | 0.301 | 0.237 | 0.72 | 0.6  | -0.87 | 3.27E-03 | 0.234 | 0.183 | 0.73 | 0.59 | -0.91 | 0.64 | 8.57E-07 | HLA-DRA(dist=46800), HLA-DRB5(dist=25528)  | intergenic     |
| 6  | 32505652 | A | T | rs72853908             | 1.42E-05 | 0.248 | 0.189 | 0.71 | 0.58 | -0.86 | 3.49E-03 | 0.204 | 0.154 | 0.71 | 0.56 | -0.89 | 0.62 | 8.58E-07 | HLA-DRB5(dist=7646), HLA-DRB6(dist=14838)  | intergenic     |
| 6  | 32605101 | A | G | rs9272420              | 5.21E-05 | 0.146 | 0.210 | 0.64 | 0.51 | -0.81 | 1.38E-03 | 0.149 | 0.213 | 0.65 | 0.5  | -0.84 | 0.66 | 8.60E-07 | HLA-DQA1                                   | upstream       |
| 6  | 32606732 | G | A | rs28383357             | 4.96E-05 | 0.148 | 0.211 | 0.65 | 0.52 | -0.81 | 1.44E-03 | 0.150 | 0.213 | 0.65 | 0.5  | -0.84 | 0.66 | 8.60E-07 | HLA-DQA1                                   | intronic       |
| 6  | 32520907 | T | C | rs3828840;rs386699405  | 1.13E-03 | 0.321 | 0.270 | 0.78 | 0.66 | -0.93 | 5.60E-05 | 0.331 | 0.254 | 0.69 | 0.56 | -0.84 | 0.66 | 8.65E-07 | HLA-DRB6                                   | ncRNA_intronic |
| 6  | 32554115 | A | C | rs9270072              | 5.70E-05 | 0.247 | 0.185 | 0.72 | 0.59 | -0.87 | 1.25E-03 | 0.204 | 0.151 | 0.69 | 0.55 | -0.88 | 0.62 | 8.66E-07 | HLA-DRB1                                   | intronic       |
| 6  | 32521302 | A | G | rs71536525             | 1.24E-05 | 0.237 | 0.179 | 0.70 | 0.58 | -0.85 | 3.84E-03 | 0.208 | 0.160 | 0.73 | 0.58 | -0.91 | 0.61 | 8.70E-07 | HLA-DRB6                                   | ncRNA_intronic |
| 6  | 32556683 | G | A | rs9270225              | 1.21E-03 | 0.323 | 0.269 | 0.77 | 0.65 | -0.92 | 3.64E-05 | 0.303 | 0.230 | 0.69 | 0.56 | -0.85 | 0.66 | 8.72E-07 | HLA-DRB1                                   | intronic       |
| 6  | 32489254 | A | C | rs112594243            | 1.98E-05 | 0.298 | 0.235 | 0.72 | 0.6  | -0.87 | 3.08E-03 | 0.205 | 0.153 | 0.70 | 0.56 | -0.89 | 0.63 | 8.74E-07 | HLA-DRB5                                   | intronic       |
| 6  | 32605724 | A | G | rs9272472              | 4.85E-05 | 0.147 | 0.211 | 0.64 | 0.51 | -0.81 | 1.51E-03 | 0.149 | 0.212 | 0.65 | 0.5  | -0.84 | 0.66 | 8.80E-07 |                                            |                |

|   |          |   |   |                       |          |       |       |      |      |       |          |       |       |      |      |       |      |          |                                            |                |
|---|----------|---|---|-----------------------|----------|-------|-------|------|------|-------|----------|-------|-------|------|------|-------|------|----------|--------------------------------------------|----------------|
| 6 | 32517018 | T | C | rs185282713           | 6.49E-05 | 0.100 | 0.149 | 0.63 | 0.49 | -0.83 | 1.18E-03 | 0.105 | 0.161 | 0.61 | 0.45 | -0.83 | 0.60 | 9.09E-07 | HLA-DRB5(dist=19012), HLA-DRB6(dist=3472)  | intergenic     |
| 6 | 32508173 | A | G | rs79476956            | 5.45E-05 | 0.139 | 0.195 | 0.67 | 0.53 | -0.84 | 1.42E-03 | 0.147 | 0.207 | 0.66 | 0.51 | -0.86 | 0.64 | 9.13E-07 | HLA-DRB5(dist=10167), HLA-DRB6(dist=12317) | intergenic     |
| 6 | 32504474 | C | T | rs9269348             | 1.03E-03 | 0.370 | 0.313 | 0.78 | 0.66 | -0.92 | 6.08E-05 | 0.353 | 0.273 | 0.69 | 0.56 | -0.84 | 0.67 | 9.13E-07 | HLA-DRB6(dist=12695), HLA-DRB1(dist=6073)  | intergenic     |
| 6 | 32480130 | T | G | rs77131796            | 9.67E-06 | 0.199 | 0.263 | 0.70 | 0.57 | -0.85 | 6.17E-03 | 0.210 | 0.265 | 0.74 | 0.59 | -0.93 | 0.64 | 9.16E-07 | HLA-DRA(dist=67304), HLA-DRB5(dist=5024)   | intergenic     |
| 6 | 32610478 | C | G | rs1048414             | 5.32E-05 | 0.135 | 0.196 | 0.64 | 0.51 | -0.81 | 1.39E-03 | 0.147 | 0.211 | 0.65 | 0.5  | -0.84 | 0.65 | 9.16E-07 | HLA-DQA1                                   | exonic         |
| 6 | 32610481 | T | C | rs1048419             | 5.33E-05 | 0.135 | 0.196 | 0.64 | 0.51 | -0.81 | 1.39E-03 | 0.147 | 0.211 | 0.65 | 0.5  | -0.84 | 0.65 | 9.19E-07 | HLA-DQA1                                   | exonic         |
| 6 | 32588980 | C | T | rs386699493;rs9271486 | 5.94E-05 | 0.150 | 0.215 | 0.64 | 0.52 | -0.8  | 1.35E-03 | 0.143 | 0.206 | 0.64 | 0.49 | -0.84 | 0.66 | 9.26E-07 | HLA-DRB1(dist=31367), HLA-DQA1(dist=16203) | intergenic     |
| 6 | 32611958 | C | G | rs9273040             | 4.97E-05 | 0.135 | 0.196 | 0.64 | 0.51 | -0.81 | 1.48E-03 | 0.147 | 0.210 | 0.65 | 0.5  | -0.84 | 0.65 | 9.27E-07 | HLA-DQA1                                   | downstream     |
| 6 | 32469825 | T | A | rs79696067            | 4.11E-05 | 0.135 | 0.420 | 0.75 | 0.63 | -0.88 | 1.86E-03 | 0.355 | 0.423 | 0.75 | 0.52 | -0.91 | 0.68 | 9.33E-07 | HLA-DRA(dist=56999), HLA-DRB5(dist=15329)  | intergenic     |
| 6 | 32468840 | C | G | rs74290583            | 1.17E-05 | 0.263 | 0.201 | 0.70 | 0.58 | -0.85 | 4.97E-03 | 0.199 | 0.151 | 0.72 | 0.57 | -0.91 | 0.63 | 9.36E-07 | HLA-DRA(dist=56014), HLA-DRB5(dist=16314)  | intergenic     |
| 6 | 32518301 | C | G | rs113068532           | 2.41E-03 | 0.395 | 0.342 | 0.80 | 0.67 | -0.94 | 1.81E-05 | 0.394 | 0.307 | 0.68 | 0.56 | -0.83 | 0.68 | 9.43E-07 | HLA-DRB5(dist=20295), HLA-DRB6(dist=2189)  | intergenic     |
| 6 | 32489247 | T | C | rs116819869           | 2.00E-05 | 0.298 | 0.236 | 0.72 | 0.6  | -0.87 | 3.31E-03 | 0.205 | 0.154 | 0.70 | 0.56 | -0.89 | 0.63 | 9.49E-07 | HLA-DRB5                                   | intronic       |
| 6 | 32589771 | A | G | rs9271520             | 4.63E-05 | 0.131 | 0.194 | 0.63 | 0.5  | -0.8  | 1.70E-03 | 0.141 | 0.202 | 0.65 | 0.5  | -0.84 | 0.65 | 9.51E-07 | HLA-DRB1(dist=32158), HLA-DQA1(dist=15412) | intergenic     |
| 6 | 32605558 | G | A | rs9272458             | 2.04E-05 | 0.297 | 0.227 | 0.70 | 0.58 | -0.84 | 3.30E-03 | 0.269 | 0.208 | 0.71 | 0.58 | -0.88 | 0.67 | 9.60E-07 | HLA-DQA1                                   | intergenic     |
| 6 | 32609358 | C | T | rs28383453            | 5.40E-05 | 0.143 | 0.205 | 0.65 | 0.52 | -0.81 | 1.48E-03 | 0.148 | 0.211 | 0.65 | 0.5  | -0.84 | 0.66 | 9.66E-07 | HLA-DQA1                                   | intronic       |
| 6 | 32459103 | G | T | rs115798262           | 9.54E-06 | 0.214 | 0.277 | 0.71 | 0.59 | -0.87 | 6.78E-03 | 0.237 | 0.291 | 0.76 | 0.61 | -0.94 | 0.64 | 9.68E-07 | HLA-DRA(dist=46277), HLA-DRB5(dist=26051)  | intergenic     |
| 6 | 32645088 | C | T | rs28755262            | 2.23E-03 | 0.198 | 0.249 | 0.74 | 0.61 | -0.91 | 1.93E-05 | 0.163 | 0.244 | 0.60 | 0.47 | -0.77 | 0.67 | 9.68E-07 | HLA-DQB1(dist=10622), HLA-DQA2(dist=64075) | intergenic     |
| 6 | 32473554 | A | G | rs113310401           | 1.91E-06 | 0.342 | 0.272 | 0.72 | 0.6  | -0.85 | 1.65E-02 | 0.244 | 0.200 | 0.77 | 0.62 | -0.96 | 0.64 | 9.83E-07 | HLA-DRA(dist=60728), HLA-DRB5(dist=11600)  | intergenic     |
| 6 | 32607253 | C | A | rs28383380            | 5.42E-05 | 0.141 | 0.203 | 0.64 | 0.51 | -0.81 | 1.50E-03 | 0.150 | 0.212 | 0.65 | 0.5  | -0.85 | 0.66 | 9.88E-07 | HLA-DQA1                                   | intronic       |
| 6 | 32606864 | T | C | rs28383362            | 5.30E-05 | 0.141 | 0.202 | 0.65 | 0.51 | -0.81 | 1.54E-03 | 0.150 | 0.213 | 0.65 | 0.5  | -0.85 | 0.66 | 9.89E-07 | HLA-DQA1                                   | intronic       |
| 6 | 32541319 | G | A | rs141259629           | 4.63E-05 | 0.081 | 0.128 | 0.60 | 0.45 | -0.81 | 1.66E-03 | 0.095 | 0.148 | 0.60 | 0.44 | -0.83 | 0.59 | 1.00E-06 | HLA-DRB6(dist=13540), HLA-DRB1(dist=5228)  | intergenic     |
| 6 | 32588031 | G | A | rs9271431             | 6.01E-05 | 0.271 | 0.348 | 0.70 | 0.58 | -0.83 | 1.45E-03 | 0.263 | 0.338 | 0.71 | 0.57 | -0.86 | 0.71 | 1.01E-06 | HLA-DRB1(dist=30418), HLA-DQA1(dist=17152) | intergenic     |
| 6 | 32518369 | G | A | rs66884109            | 6.56E-06 | 0.237 | 0.178 | 0.70 | 0.57 | -0.85 | 6.96E-03 | 0.187 | 0.143 | 0.73 | 0.57 | -0.93 | 0.61 | 1.01E-06 | HLA-DRB5(dist=20363), HLA-DRB6(dist=2121)  | intergenic     |
| 6 | 32541506 | G | A | rs9269419             | 3.03E-05 | 0.234 | 0.177 | 0.70 | 0.58 | -0.86 | 2.59E-03 | 0.188 | 0.139 | 0.70 | 0.55 | -0.89 | 0.61 | 1.02E-06 | HLA-DRB6(dist=13727), HLA-DRB1(dist=5041)  | intergenic     |
| 6 | 32460713 | T | G | rs112016967           | 1.28E-05 | 0.289 | 0.355 | 0.74 | 0.62 | -0.88 | 5.12E-03 | 0.362 | 0.421 | 0.78 | 0.64 | -0.95 | 0.66 | 1.03E-06 | HLA-DRA(dist=47887), HLA-DRB5(dist=24441)  | intergenic     |
| 6 | 32570401 | A | G | rs386699448;rs2454138 | 5.36E-05 | 0.161 | 0.228 | 0.65 | 0.52 | -0.8  | 1.70E-03 | 0.131 | 0.189 | 0.64 | 0.49 | -0.85 | 0.66 | 1.03E-06 | HLA-DRB1(dist=12788), HLA-DQA1(dist=34782) | intergenic     |
| 6 | 32480154 | A | G | rs79753869            | 3.56E-05 | 0.287 | 0.226 | 0.73 | 0.61 | -0.87 | 2.32E-03 | 0.216 | 0.165 | 0.72 | 0.57 | -0.9  | 0.63 | 1.03E-06 | HLA-DRA(dist=67328), HLA-DRB5(dist=5000)   | intergenic     |
| 6 | 32606942 | G | A | rs28383365            | 6.22E-05 | 0.145 | 0.207 | 0.65 | 0.52 | -0.81 | 1.41E-03 | 0.149 | 0.212 | 0.65 | 0.5  | -0.84 | 0.66 | 1.03E-06 | HLA-DQA1                                   | intronic       |
| 6 | 32555965 | T | G | rs9270187             | 5.32E-06 | 0.196 | 0.140 | 0.67 | 0.54 | -0.82 | 8.41E-03 | 0.169 | 0.129 | 0.73 | 0.57 | -0.94 | 0.59 | 1.03E-06 | HLA-DRB1                                   | intronic       |
| 6 | 32522979 | T | G | rs113078541           | 6.48E-05 | 0.123 | 0.174 | 0.66 | 0.52 | -0.84 | 1.39E-03 | 0.123 | 0.178 | 0.65 | 0.49 | -0.86 | 0.61 | 1.03E-06 | HLA-DRB6                                   | ncRNA_intronic |
| 6 | 32604394 | T | C | rs9272347             | 5.06E-05 | 0.143 | 0.206 | 0.64 | 0.51 | -0.8  | 1.72E-03 | 0.148 | 0.210 | 0.65 | 0.5  | -0.85 | 0.66 | 1.04E-06 | HLA-DQA1                                   | upstream       |
| 6 | 32559499 | A | G | rs28366256            | 4.67E-05 | 0.112 | 0.168 | 0.63 | 0.49 | -0.81 | 1.86E-03 | 0.124 | 0.180 | 0.64 | 0.48 | -0.85 | 0.63 | 1.04E-06 | HLA-DRB1(dist=1886), HLA-DQA1(dist=45684)  | intergenic     |
| 6 | 32491971 | C | T | rs113934686           | 3.74E-05 | 0.280 | 0.219 | 0.72 | 0.6  | -0.87 | 2.33E-03 | 0.197 | 0.148 | 0.71 | 0.56 | -0.9  | 0.63 | 1.04E-06 | HLA-DRB5                                   | intronic       |
| 6 | 32570400 | C | T | rs2516049;rs386699448 | 5.40E-05 | 0.162 | 0.229 | 0.65 | 0.52 | -0.81 | 1.70E-03 | 0.131 | 0.189 | 0.64 | 0.49 | -0.85 | 0.66 | 1.04E-06 | HLA-DRB1(dist=12787), HLA-DQA1(dist=34783) | intergenic     |
| 6 | 32559124 | T | C | rs34788621            | 4.89E-05 | 0.108 | 0.162 | 0.63 | 0.49 | -0.81 | 1.75E-03 | 0.123 | 0.180 | 0.64 | 0.48 | -0.85 | 0.62 | 1.04E-06 | HLA-DRB1(dist=1511), HLA-DQA1(dist=46059)  | intergenic     |
| 6 | 32488614 | A | C | rs142329611           | 8.35E-06 | 0.330 | 0.263 | 0.72 | 0.61 | -0.86 | 7.30E-03 | 0.241 | 0.194 | 0.76 | 0.61 | -0.94 | 0.64 | 1.05E-06 | HLA-DRB5                                   | intronic       |
| 6 | 32589751 | T | C | rs9271519             | 5.13E-05 | 0.129 | 0.190 | 0.63 | 0.5  | -0.8  | 1.71E-03 | 0.140 | 0.202 | 0.65 | 0.5  | -0.84 | 0.65 | 1.05E-06 | HLA-DRB1(dist=32138), HLA-DQA1(dist=15432) | intergenic     |
| 6 | 32520940 | A | G | rs111432098           | 5.13E-05 | 0.096 | 0.142 | 0.64 | 0.49 | -0.84 | 1.63E-03 | 0.106 | 0.158 | 0.63 | 0.47 | -0.85 | 0.58 | 1.06E-06 | HLA-DRB6                                   | ncRNA_intronic |
| 6 | 32606217 | G | A | rs9272498             | 5.67E-05 | 0.146 | 0.208 | 0.65 | 0.52 | -0.81 | 1.58E-03 | 0.150 | 0.213 | 0.65 | 0.5  | -0.85 | 0.66 | 1.06E-06 | HLA-DQA1                                   | intronic       |
| 6 | 32503771 | G | C | rs35874713            | 2.57E-05 | 0.216 | 0.163 | 0.71 | 0.58 | -0.86 | 2.60E-03 | 0.193 | 0.144 | 0.70 | 0.55 | -0.89 | 0.61 | 1.07E-06 | HLA-DRB5(dist=5765), HLA-DRB6(dist=16719)  | intergenic     |
| 6 | 32491902 | G | A | rs114786900           | 6.13E-05 | 0.275 | 0.217 | 0.73 | 0.61 | -0.88 | 1.48E-03 | 0.212 | 0.160 | 0.71 | 0.56 | -0.89 | 0.62 | 1.07E-06 | HLA-DRB5                                   | intronic       |
| 6 | 32527296 | G | A | rs71535466;rs28624072 | 6.62E-06 | 0.228 | 0.170 | 0.69 | 0.57 | -0.85 | 7.22E-03 | 0.186 | 0.143 | 0.73 | 0.57 | -0.93 | 0.60 | 1.07E-06 | HLA-DRB6                                   | ncRNA_intronic |
| 6 | 32492626 | G | A | rs144550975           | 2.29E-05 | 0.111 | 0.165 | 0.63 | 0.49 | -0.82 | 3.74E-03 | 0.116 | 0.162 | 0.68 | 0.51 | -0.9  | 0.60 | 1.07E-06 | HLA-DRB5                                   | intronic       |
| 6 | 32460045 | G | A | rs73401361            | 2.58E-05 | 0.183 | 0.246 | 0.69 | 0.56 | -0.85 | 3.30E-03 | 0.204 | 0.262 | 0.72 | 0.57 | -0.91 | 0.65 | 1.08E-06 | HLA-DRA(dist=47219), HLA-DRB5(dist=25109)  | intergenic     |
| 6 | 32589740 | A | G | rs9271517             | 5.27E-05 | 0.129 | 0.190 | 0.63 | 0.5  | -0.8  | 1.74E-03 | 0.140 | 0.202 | 0.65 | 0.5  | -0.85 | 0.65 | 1.09E-06 | HLA-DRB1(dist=32127), HLA-DQA1(dist=15443) | intergenic     |
| 6 | 32457038 | T | C | rs77585607            | 4.05E-06 | 0.106 | 0.162 | 0.61 | 0.47 | -0.79 | 1.51E-02 | 0.112 | 0.149 | 0.72 | 0.54 | -0.97 | 0.58 | 1.10E-06 | HLA-DRA(dist=44212), HLA-DRB5(dist=28116)  | intergenic     |
| 6 | 32571811 | G | A | rs28383182            | 1.94E-05 | 0.147 | 0.215 | 0.63 | 0.5  | -0.79 | 4.33E-03 | 0.152 | 0.208 | 0.68 | 0.53 | -0.88 | 0.66 | 1.10E-06 | HLA-DRB1(dist=14198), HLA-DQA1(dist=33372) | intergenic     |
| 6 | 32523411 | A | G | rs116292975           | 3.80E-05 | 0.083 | 0.127 | 0.62 | 0.47 | -0.83 | 2.16E-03 | 0.106 | 0.155 | 0.64 | 0.48 | -0.87 | 0.57 | 1.11E-06 | HLA-DRB6                                   | ncRNA_intronic |
| 6 | 32470263 | C | T | rs113420629           | 3.64E-05 | 0.251 | 0.314 | 0.73 | 0.61 | -0.88 | 2.58E-03 | 0.256 | 0.319 | 0.74 | 0.59 | -0.91 | 0.66 | 1.11E-06 | HLA-DRA(dist=57437), HLA-DRB5(dist=14891)  | intergenic     |
| 6 | 32503613 | G | A | rs77675186            | 3.49E-05 | 0.217 | 0.165 | 0.71 | 0.58 | -0.87 | 2.13E-03 | 0.195 | 0.144 | 0.70 | 0.55 | -0.88 | 0.61 | 1.11E-06 | HLA-DRB5(dist=5607), HLA-DRB6(dist=16877)  | intergenic     |
| 6 | 32645766 | G | A | rs116005148           | 2.53E-03 | 0.213 | 0.265 | 0.75 | 0.62 | -0.92 | 1.82E-05 | 0.164 | 0.247 | 0.60 | 0.47 | -0.77 | 0.67 | 1.11E-06 | HLA-DQB1(dist=11300), HLA-DQA2(dist=63397) | intergenic     |
| 6 | 32459978 | A | G | rs139036786           | 5.22E-05 | 0.169 | 0.228 | 0.69 | 0.55 | -0.85 | 1.86E-03 | 0.169 | 0.230 | 0.68 | 0.53 | -0.87 | 0.65 | 1.11E-06 | HLA-DRA(dist=47152), HLA-DRB5(dist=25176)  | intergenic     |
| 6 | 32491900 | G | T | rs116089647           | 6.41E-05 | 0.275 | 0.217 | 0.73 | 0.61 | -0.88 | 1.50E-03 | 0.212 | 0.160 | 0.71 | 0.56 | -0.89 | 0.63 | 1.12E-06 | HLA-DRB5                                   | intronic       |
| 6 | 32592383 | T | C | rs9271650             | 8.74E-07 | 0.483 | 0.395 | 0.70 | 0.59 | -0.82 | 3.11E-02 | 0.415 | 0.359 | 0.79 | 0.65 | -0.96 | 0.70 | 1.12E-06 | HLA-DRB1(dist=34770), HLA-DQA1(dist=12800) | intergenic     |
| 6 | 32572952 | G | A | rs9270946             | 1.49E-03 | 0.322 | 0.264 | 0.76 | 0.63 | -0.9  | 4.11E-05 | 0.334 | 0.251 | 0.67 | 0.55 | -0.82 | 0.69 | 1.13E-06 | HLA-DRB1(dist=15339), HLA-DQA1(dist=32231) | intergenic     |
| 6 | 32516848 | T | G | rs111739306           | 1.85E-03 | 0.366 | 0.317 | 0.80 | 0.68 | -0.95 | 3.86E-05 | 0.332 | 0.253 | 0.68 | 0.56 | -0.83 | 0.67 | 1.13E-06 | HLA-DRB5(dist=18842), HLA-DRB6(dist=3642)  | intergenic     |

|    |           |   |   |                                   |          |       |       |      |      |       |          |       |       |      |      |       |      |          |                                                |                |
|----|-----------|---|---|-----------------------------------|----------|-------|-------|------|------|-------|----------|-------|-------|------|------|-------|------|----------|------------------------------------------------|----------------|
| 6  | 32536245  | G | C | rs35985055                        | 5.51E-05 | 0.305 | 0.246 | 0.74 | 0.62 | -0.89 | 1.79E-03 | 0.246 | 0.190 | 0.72 | 0.58 | -0.89 | 0.64 | 1.18E-06 | HLA-DRB6(dist=8466), HLA-DRB1(dist=10302)      | intergenic     |
| 6  | 32647762  | A | G | rs28371233                        | 1.62E-03 | 0.186 | 0.239 | 0.73 | 0.59 | -0.89 | 3.90E-05 | 0.145 | 0.222 | 0.59 | 0.46 | -0.77 | 0.67 | 1.18E-06 | HLA-DQB1(dist=13296), HLA-DQA2(dist=61401)     | intergenic     |
| 6  | 32485118  | G | T | rs147509207                       | 1.41E-05 | 0.516 | 0.444 | 0.75 | 0.64 | -0.88 | 5.84E-03 | 0.456 | 0.408 | 0.82 | 0.68 | -0.99 | 0.66 | 1.19E-06 | HLA-DRB5                                       | downstream     |
| 6  | 32552547  | C | T | rs115273610                       | 3.34E-05 | 0.131 | 0.179 | 0.69 | 0.55 | -0.87 | 3.19E-03 | 0.103 | 0.143 | 0.68 | 0.5  | -0.92 | 0.58 | 1.20E-06 | HLA-DRB1                                       | intronic       |
| 6  | 32643336  | G | A | rs9275029                         | 2.06E-03 | 0.190 | 0.238 | 0.75 | 0.61 | -0.92 | 3.44E-05 | 0.157 | 0.233 | 0.61 | 0.48 | -0.79 | 0.66 | 1.21E-06 | HLA-DQB1(dist=8870), HLA-DQA2(dist=65827)      | intergenic     |
| 6  | 32647735  | G | A | rs28371231                        | 1.86E-03 | 0.201 | 0.253 | 0.74 | 0.61 | -0.91 | 3.37E-05 | 0.149 | 0.228 | 0.59 | 0.46 | -0.77 | 0.67 | 1.21E-06 | HLA-DQB1(dist=13269), HLA-DQA2(dist=61428)     | intergenic     |
| 6  | 32457539  | C | T | rs76883199                        | 1.27E-05 | 0.389 | 0.461 | 0.74 | 0.63 | -0.88 | 5.92E-03 | 0.406 | 0.469 | 0.77 | 0.64 | -0.94 | 0.68 | 1.21E-06 | HLA-DRA(dist=44713), HLA-DRB5(dist=27615)      | intergenic     |
| 6  | 32546696  | G | A | rs3208409                         | 3.25E-05 | 0.107 | 0.160 | 0.63 | 0.49 | -0.81 | 2.86E-03 | 0.128 | 0.182 | 0.66 | 0.5  | -0.87 | 0.62 | 1.21E-06 | HLA-DRB1                                       | UTR3           |
| 6  | 32456951  | G | A | rs78443865                        | 3.16E-05 | 0.370 | 0.435 | 0.76 | 0.64 | -0.9  | 2.92E-03 | 0.145 | 0.478 | 0.77 | 0.64 | -0.94 | 0.67 | 1.22E-06 | HLA-DRA(dist=44125), HLA-DRB5(dist=28203)      | intergenic     |
| 6  | 32501300  | G | A | rs80029685                        | 3.87E-05 | 0.236 | 0.181 | 0.72 | 0.59 | -0.87 | 2.40E-03 | 0.194 | 0.143 | 0.70 | 0.55 | -0.88 | 0.62 | 1.22E-06 | HLA-DRB5(dist=3294), HLA-DRB6(dist=19190)      | intergenic     |
| 6  | 32499123  | G | T | rs79187454                        | 3.16E-05 | 0.499 | 0.434 | 0.77 | 0.65 | -0.9  | 3.10E-03 | 0.411 | 0.354 | 0.79 | 0.65 | -0.95 | 0.66 | 1.23E-06 | HLA-DRB5(dist=1117), HLA-DRB6(dist=21367)      | intergenic     |
| 6  | 32645871  | G | C | rs28755290                        | 1.79E-03 | 0.208 | 0.261 | 0.75 | 0.61 | -0.91 | 3.60E-05 | 0.160 | 0.239 | 0.60 | 0.47 | -0.78 | 0.67 | 1.24E-06 | HLA-DQB1(dist=11405), HLA-DQA2(dist=63292)     | intergenic     |
| 6  | 32460116  | A | G | rs111499705                       | 4.39E-05 | 0.194 | 0.255 | 0.70 | 0.57 | -0.86 | 2.42E-03 | 0.211 | 0.273 | 0.71 | 0.57 | -0.89 | 0.66 | 1.24E-06 | HLA-DRA(dist=47290), HLA-DRB5(dist=25038)      | intergenic     |
| 6  | 32612241  | A | T | rs9273070                         | 6.40E-05 | 0.125 | 0.169 | 0.64 | 0.5  | -0.82 | 1.50E-03 | 0.146 | 0.209 | 0.65 | 0.5  | -0.84 | 0.64 | 1.25E-06 | HLA-DQA1                                       | downstream     |
| 6  | 32459572  | T | C | rs74345507                        | 3.67E-05 | 0.084 | 0.127 | 0.63 | 0.48 | -0.84 | 2.54E-03 | 0.095 | 0.139 | 0.65 | 0.47 | -0.89 | 0.55 | 1.25E-06 | HLA-DRA(dist=46746), HLA-DRB5(dist=25582)      | intergenic     |
| 6  | 32577025  | T | G | rs9271138                         | 2.43E-05 | 0.281 | 0.217 | 0.71 | 0.59 | -0.85 | 3.90E-03 | 0.234 | 0.182 | 0.73 | 0.58 | -0.91 | 0.65 | 1.26E-06 | HLA-DRB1(dist=19412), HLA-DQA1(dist=28158)     | intergenic     |
| 6  | 32502789  | A | G | rs74333610                        | 1.66E-05 | 0.253 | 0.196 | 0.72 | 0.6  | -0.87 | 4.30E-03 | 0.211 | 0.161 | 0.72 | 0.57 | -0.91 | 0.62 | 1.26E-06 | HLA-DRB5(dist=4783), HLA-DRB6(dist=17701)      | intergenic     |
| 6  | 32612251  | T | G | rs9273071                         | 6.44E-05 | 0.116 | 0.170 | 0.64 | 0.5  | -0.82 | 1.52E-03 | 0.145 | 0.207 | 0.65 | 0.5  | -0.84 | 0.64 | 1.27E-06 | HLA-DQA1                                       | downstream     |
| 6  | 32551653  | A | C | rs9269927                         | 3.04E-03 | 0.300 | 0.255 | 0.80 | 0.67 | -0.96 | 2.15E-05 | 0.307 | 0.232 | 0.68 | 0.56 | -0.84 | 0.65 | 1.27E-06 | HLA-DRB1                                       | intronic       |
| 6  | 32519968  | G | C | rs112654908                       | 5.42E-05 | 0.085 | 0.128 | 0.63 | 0.48 | -0.84 | 1.68E-03 | 0.112 | 0.164 | 0.64 | 0.48 | -0.86 | 0.58 | 1.27E-06 | HLA-DRB6                                       | downstream     |
| 6  | 32502774  | T | C | rs77544868                        | 1.50E-05 | 0.254 | 0.197 | 0.72 | 0.59 | -0.87 | 4.69E-03 | 0.213 | 0.163 | 0.72 | 0.57 | -0.91 | 0.62 | 1.28E-06 | HLA-DRB5(dist=4768), HLA-DRB6(dist=17716)      | intergenic     |
| 6  | 32478811  | G | T | rs115966492                       | 2.26E-05 | 0.512 | 0.439 | 0.75 | 0.63 | -0.88 | 4.67E-03 | 0.458 | 0.406 | 0.81 | 0.67 | -0.98 | 0.66 | 1.29E-06 | HLA-DRA(dist=65985), HLA-DRB5(dist=6343)       | intergenic     |
| 6  | 32501455  | T | A | rs35231986                        | 4.36E-05 | 0.221 | 0.168 | 0.71 | 0.58 | -0.87 | 2.24E-03 | 0.193 | 0.142 | 0.69 | 0.55 | -0.88 | 0.61 | 1.30E-06 | HLA-DRB5(dist=3449), HLA-DRB6(dist=19035)      | intergenic     |
| 6  | 32607660  | A | C | rs28383392                        | 4.63E-05 | 0.134 | 0.194 | 0.64 | 0.51 | -0.81 | 2.29E-03 | 0.141 | 0.200 | 0.66 | 0.5  | -0.86 | 0.65 | 1.30E-06 | HLA-DQA1                                       | intronic       |
| 6  | 32607659  | C | T | rs28383391                        | 4.63E-05 | 0.134 | 0.194 | 0.64 | 0.51 | -0.81 | 2.29E-03 | 0.141 | 0.200 | 0.66 | 0.5  | -0.86 | 0.65 | 1.30E-06 | HLA-DQA1                                       | intronic       |
| 6  | 32457041  | C | A | rs76327699                        | 6.87E-06 | 0.110 | 0.165 | 0.62 | 0.48 | -0.8  | 1.22E-02 | 0.112 | 0.150 | 0.71 | 0.53 | -0.96 | 0.58 | 1.30E-06 | HLA-DRA(dist=44215), HLA-DRB5(dist=28113)      | intergenic     |
| 6  | 32506923  | A | G | rs76340838                        | 3.94E-05 | 0.298 | 0.238 | 0.74 | 0.61 | -0.88 | 2.65E-03 | 0.236 | 0.183 | 0.72 | 0.58 | -0.9  | 0.64 | 1.30E-06 | HLA-DRB5(dist=8917), HLA-DRB6(dist=13567)      | intergenic     |
| 6  | 32632272  | T | C | rs4367410                         | 1.34E-05 | 0.287 | 0.221 | 0.70 | 0.59 | -0.84 | 6.18E-03 | 0.234 | 0.187 | 0.75 | 0.6  | -0.94 | 0.65 | 1.31E-06 | HLA-DQB1                                       | intronic       |
| 6  | 32539581  | T | G | rs9269303                         | 1.11E-02 | 0.433 | 0.392 | 0.85 | 0.72 | -1    | 1.69E-06 | 0.434 | 0.343 | 0.68 | 0.56 | -0.82 | 0.67 | 1.31E-06 | HLA-DRB6(dist=11802), HLA-DRB1(dist=6966)      | intergenic     |
| 6  | 32554339  | G | C | rs111297585                       | 4.00E-05 | 0.331 | 0.393 | 0.77 | 0.65 | -0.91 | 2.81E-03 | 0.311 | 0.374 | 0.76 | 0.62 | -0.92 | 0.66 | 1.31E-06 | HLA-DRB1                                       | intronic       |
| 13 | 105877189 | G | C | rs78802875                        | 4.68E-05 | 0.153 | 0.109 | 1.48 | 1.17 | -1.86 | 6.27E-03 | 0.138 | 0.099 | 1.47 | 1.11 | -1.93 | 1.72 | 1.31E-06 | LINC01309(dist=1797154), DAOA-AS1(dist=234217) | intergenic     |
| 6  | 32576888  | A | G | rs9271128                         | 2.01E-03 | 0.371 | 0.316 | 0.78 | 0.66 | -0.93 | 3.73E-05 | 0.351 | 0.270 | 0.68 | 0.56 | -0.83 | 0.68 | 1.31E-06 | HLA-DRB1(dist=19275), HLA-DQA1(dist=28295)     | intergenic     |
| 6  | 32551068  | C | T | rs9269895                         | 5.01E-05 | 0.298 | 0.237 | 0.73 | 0.61 | -0.88 | 2.24E-03 | 0.220 | 0.167 | 0.71 | 0.57 | -0.89 | 0.64 | 1.32E-06 | HLA-DRB1                                       | intronic       |
| 6  | 32524694  | G | T | rs114500718                       | 2.86E-03 | 0.359 | 0.309 | 0.80 | 0.67 | -0.94 | 2.46E-05 | 0.347 | 0.264 | 0.68 | 0.56 | -0.82 | 0.68 | 1.32E-06 | HLA-DRB6                                       | ncRNA_intronic |
| 6  | 32474954  | T | C | rs113475057                       | 1.36E-05 | 0.227 | 0.292 | 0.71 | 0.59 | -0.86 | 6.58E-03 | 0.243 | 0.299 | 0.75 | 0.61 | -0.93 | 0.66 | 1.33E-06 | HLA-DRA(dist=62128), HLA-DRB5(dist=10200)      | intergenic     |
| 6  | 32522871  | A | G | rs184578930                       | 5.74E-05 | 0.150 | 0.199 | 0.71 | 0.57 | -0.89 | 2.01E-03 | 0.136 | 0.191 | 0.67 | 0.51 | -0.88 | 0.61 | 1.33E-06 | HLA-DRB6                                       | ncRNA_intronic |
| 6  | 32645825  | T | C | rs113838733                       | 2.66E-03 | 0.212 | 0.263 | 0.75 | 0.62 | -0.92 | 2.17E-05 | 0.161 | 0.244 | 0.60 | 0.46 | -0.77 | 0.67 | 1.33E-06 | HLA-DQB1(dist=11359), HLA-DQA2(dist=63338)     | intergenic     |
| 6  | 32480206  | C | A | rs145958870                       | 6.19E-05 | 0.081 | 0.124 | 0.62 | 0.47 | -0.83 | 1.90E-03 | 0.078 | 0.121 | 0.61 | 0.44 | -0.87 | 0.55 | 1.33E-06 | HLA-DRA(dist=67380), HLA-DRB5(dist=4948)       | intergenic     |
| 6  | 32610997  | C | G | rs1130162                         | 5.91E-05 | 0.136 | 0.192 | 0.66 | 0.52 | -0.83 | 1.89E-03 | 0.161 | 0.226 | 0.66 | 0.51 | -0.85 | 0.65 | 1.34E-06 | HLA-DQA1                                       | UTR3           |
| 6  | 32645974  | G | A | rs28755292                        | 2.69E-03 | 0.283 | 0.264 | 0.75 | 0.62 | -0.92 | 2.17E-05 | 0.161 | 0.244 | 0.60 | 0.46 | -0.77 | 0.67 | 1.35E-06 | HLA-DQB1(dist=11508), HLA-DQA2(dist=63189)     | intergenic     |
| 6  | 32478161  | G | A | rs139612130                       | 3.00E-07 | 0.404 | 0.484 | 0.72 | 0.61 | -0.85 | 5.24E-02 | 0.523 | 0.480 | 0.84 | 0.7  | -1.01 | 0.67 | 1.36E-06 | HLA-DRA(dist=65335), HLA-DRB5(dist=6993)       | intergenic     |
| 6  | 32539339  | A | G | rs9269282                         | 2.74E-03 | 0.366 | 0.315 | 0.80 | 0.67 | -0.94 | 2.59E-05 | 0.359 | 0.278 | 0.69 | 0.56 | -0.83 | 0.68 | 1.36E-06 | HLA-DRB6(dist=11560), HLA-DRB1(dist=7208)      | intergenic     |
| 6  | 32454401  | A | T | rs9269256                         | 2.79E-05 | 0.246 | 0.185 | 0.69 | 0.57 | -0.84 | 3.71E-03 | 0.203 | 0.153 | 0.71 | 0.56 | -0.9  | 0.64 | 1.36E-06 | HLA-DRA(dist=41575), HLA-DRB5(dist=30753)      | intergenic     |
| 6  | 32520256  | G | A | rs115706291                       | 3.98E-05 | 0.066 | 0.106 | 0.59 | 0.43 | -0.82 | 1.96E-03 | 0.101 | 0.151 | 0.63 | 0.47 | -0.86 | 0.56 | 1.37E-06 | HLA-DRB6                                       | downstream     |
| 6  | 32644701  | G | A | rs28755249                        | 2.96E-03 | 0.210 | 0.260 | 0.76 | 0.62 | -0.92 | 2.02E-05 | 0.160 | 0.242 | 0.60 | 0.46 | -0.77 | 0.67 | 1.38E-06 | HLA-DQB1(dist=10235), HLA-DQA2(dist=64462)     | intergenic     |
| 6  | 32644694  | C | G | rs28755248                        | 3.24E-03 | 0.209 | 0.259 | 0.76 | 0.62 | -0.92 | 1.77E-05 | 0.160 | 0.242 | 0.60 | 0.46 | -0.77 | 0.67 | 1.39E-06 | HLA-DQB1(dist=10228), HLA-DQA2(dist=64469)     | intergenic     |
| 6  | 32460082  | C | G | rs75127169                        | 3.35E-05 | 0.185 | 0.247 | 0.69 | 0.56 | -0.85 | 3.45E-03 | 0.206 | 0.267 | 0.71 | 0.57 | -0.9  | 0.66 | 1.40E-06 | HLA-DRA(dist=47256), HLA-DRB5(dist=25072)      | intergenic     |
| 6  | 32489269  | C | T | rs112477119                       | 6.35E-05 | 0.112 | 0.159 | 0.66 | 0.52 | -0.85 | 1.91E-03 | 0.119 | 0.168 | 0.67 | 0.5  | -0.89 | 0.60 | 1.41E-06 | HLA-DRB5                                       | intronic       |
| 6  | 32642604  | G | C | rs9274994                         | 1.88E-03 | 0.195 | 0.248 | 0.74 | 0.6  | -0.9  | 3.68E-05 | 0.146 | 0.222 | 0.60 | 0.46 | -0.78 | 0.67 | 1.42E-06 | HLA-DQB1(dist=8138), HLA-DQA2(dist=66559)      | intergenic     |
| 6  | 32607596  | G | A | rs28383389                        | 5.15E-05 | 0.130 | 0.189 | 0.64 | 0.51 | -0.81 | 2.27E-03 | 0.141 | 0.200 | 0.66 | 0.5  | -0.86 | 0.65 | 1.42E-06 | HLA-DQA1                                       | intronic       |
| 6  | 32460295  | T | C | rs77361953                        | 3.47E-05 | 0.179 | 0.240 | 0.69 | 0.56 | -0.85 | 3.54E-03 | 0.197 | 0.255 | 0.72 | 0.57 | -0.9  | 0.65 | 1.44E-06 | HLA-DRA(dist=47469), HLA-DRB5(dist=24859)      | intergenic     |
| 6  | 32604793  | T | C | rs386699538;rs9272389;rs386699539 | 2.93E-03 | 0.371 | 0.429 | 0.79 | 0.66 | -0.93 | 2.28E-05 | 0.363 | 0.461 | 0.67 | 0.55 | -0.81 | 0.71 | 1.45E-06 | HLA-DQA1                                       | upstream       |
| 6  | 32470187  | C | G | rs112452897                       | 1.96E-05 | 0.237 | 0.301 | 0.72 | 0.6  | -0.87 | 5.15E-03 | 0.272 | 0.332 | 0.75 | 0.61 | -0.93 | 0.67 | 1.45E-06 | HLA-DRA(dist=57361), HLA-DRB5(dist=14967)      | intergenic     |
| 6  | 32457874  | T | C | rs74973088                        | 4.27E-05 | 0.219 | 0.281 | 0.72 | 0.59 | -0.87 | 3.04E-03 | 0.230 | 0.289 | 0.73 | 0.59 | -0.91 | 0.66 | 1.46E-06 | HLA-DRA(dist=45048), HLA-DRB5(dist=27280)      | intergenic     |
| 6  | 32604264  | G | T | rs9272336                         | 3.79E-05 | 0.291 | 0.223 | 0.70 | 0.58 | -0.84 | 3.08E-03 | 0.270 | 0.208 | 0.71 | 0.57 | -0.88 | 0.67 | 1.46E-06 | HLA-DQA1                                       | upstream       |
| 6  | 32644806  | C | G | rs28755252                        | 3.18E-03 | 0.211 | 0.260 | 0.76 | 0.62 | -0.92 | 1.93E-05 | 0.162 | 0.244 | 0.60 | 0.47 | -0.77 | 0.67 | 1.46E-06 | HLA-DQB1(dist=10340), HLA-DQA2(dist=64357)     | intergenic     |
| 6  |           |   |   |                                   |          |       |       |      |      |       |          |       |       |      |      |       |      |          |                                                |                |

|    |           |   |   |                        |          |       |       |      |      |       |          |       |       |      |      |       |      |          |                                                |                |
|----|-----------|---|---|------------------------|----------|-------|-------|------|------|-------|----------|-------|-------|------|------|-------|------|----------|------------------------------------------------|----------------|
| 6  | 32497277  | C | A | rs4492228              | 9.07E-06 | 0.298 | 0.235 | 0.73 | 0.61 | -0.87 | 8.74E-03 | 0.213 | 0.168 | 0.75 | 0.6  | -0.94 | 0.63 | 1.52E-06 | HLA-DRB5                                       | intronic       |
| 6  | 32627830  | C | T | rs9273455              | 2.26E-06 | 0.126 | 0.201 | 0.58 | 0.45 | -0.73 | 2.43E-02 | 0.150 | 0.194 | 0.73 | 0.57 | -0.95 | 0.66 | 1.53E-06 | HLA-DQB1                                       | UTR3           |
| 6  | 32489117  | A | G | rs35507994             | 1.71E-05 | 0.274 | 0.215 | 0.73 | 0.6  | -0.87 | 6.04E-03 | 0.192 | 0.147 | 0.73 | 0.57 | -0.93 | 0.62 | 1.53E-06 | HLA-DRB5                                       | intronic       |
| 13 | 105878815 | T | C | rs10508156             | 4.17E-05 | 0.130 | 0.091 | 1.50 | 1.17 | -1.93 | 7.26E-03 | 0.126 | 0.087 | 1.50 | 1.13 | -2    | 1.78 | 1.53E-06 | LINC01309(dist=1798780), DAOA-AS1(dist=232591) | intergenic     |
| 6  | 32644680  | C | T | rs28755247             | 3.45E-03 | 0.207 | 0.257 | 0.76 | 0.62 | -0.93 | 1.89E-05 | 0.158 | 0.240 | 0.60 | 0.46 | -0.77 | 0.67 | 1.55E-06 | HLA-DQB1(dist=10214), HLA-DQA2(dist=64483)     | intergenic     |
| 6  | 32629650  | T | C | rs9273873              | 2.16E-06 | 0.133 | 0.208 | 0.58 | 0.46 | -0.74 | 2.51E-02 | 0.154 | 0.198 | 0.74 | 0.57 | -0.95 | 0.66 | 1.55E-06 | HLA-DQB1                                       | intronic       |
| 6  | 32629462  | C | A | rs9273786              | 2.20E-06 | 0.133 | 0.208 | 0.58 | 0.46 | -0.74 | 2.52E-02 | 0.155 | 0.199 | 0.74 | 0.57 | -0.95 | 0.66 | 1.57E-06 | HLA-DQB1                                       | intronic       |
| 6  | 32511866  | C | T | rs72853984             | 5.72E-03 | 0.310 | 0.266 | 0.81 | 0.68 | -0.97 | 1.45E-05 | 0.338 | 0.253 | 0.66 | 0.54 | -0.81 | 0.67 | 1.57E-06 | HLA-DRB5(dist=13860), HLA-DRB6(dist=8624)      | intergenic     |
| 6  | 32474936  | C | G | rs111975618            | 1.77E-05 | 0.228 | 0.293 | 0.71 | 0.59 | -0.86 | 6.37E-03 | 0.245 | 0.301 | 0.75 | 0.61 | -0.93 | 0.66 | 1.58E-06 | HLA-DRA(dist=21610), HLA-DRB5(dist=10218)      | intergenic     |
| 6  | 32554178  | T | C | rs9270077              | 4.94E-03 | 0.310 | 0.265 | 0.80 | 0.67 | -0.96 | 1.21E-05 | 0.311 | 0.232 | 0.67 | 0.55 | -0.82 | 0.66 | 1.58E-06 | HLA-DRB1                                       | intronic       |
| 6  | 32576889  | A | T | rs9271129              | 1.79E-03 | 0.370 | 0.315 | 0.78 | 0.66 | -0.93 | 5.60E-05 | 0.352 | 0.272 | 0.69 | 0.57 | -0.84 | 0.69 | 1.58E-06 | HLA-DRB1(dist=19276), HLA-DQA1(dist=28294)     | intergenic     |
| 6  | 32495707  | G | A | rs112615434            | 3.01E-06 | 0.333 | 0.267 | 0.73 | 0.61 | -0.87 | 2.06E-02 | 0.247 | 0.209 | 0.81 | 0.65 | -1    | 0.64 | 1.58E-06 | HLA-DRB5                                       | intronic       |
| 6  | 32495966  | G | A | rs112651494            | 5.61E-06 | 0.342 | 0.273 | 0.72 | 0.61 | -0.86 | 1.33E-02 | 0.255 | 0.211 | 0.78 | 0.63 | -0.97 | 0.65 | 1.59E-06 | HLA-DRB5                                       | intronic       |
| 6  | 32646143  | A | G | rs28755302             | 2.36E-03 | 0.184 | 0.232 | 0.75 | 0.61 | -0.92 | 3.92E-05 | 0.154 | 0.232 | 0.60 | 0.47 | -0.78 | 0.66 | 1.60E-06 | HLA-DQB1(dist=11677), HLA-DQA2(dist=63020)     | intergenic     |
| 6  | 32525774  | G | A | rs78205167             | 4.08E-05 | 0.292 | 0.232 | 0.73 | 0.61 | -0.88 | 3.16E-03 | 0.223 | 0.171 | 0.72 | 0.57 | -0.9  | 0.64 | 1.60E-06 | HLA-DRB6                                       | ncRNA_exonic   |
| 6  | 32605419  | G | C | rs9272444              | 3.82E-05 | 0.141 | 0.205 | 0.64 | 0.51 | -0.8  | 3.69E-03 | 0.135 | 0.188 | 0.67 | 0.51 | -0.88 | 0.66 | 1.62E-06 | HLA-DQA1                                       | intronic       |
| 6  | 32611392  | C | T | rs9272983              | 4.98E-05 | 0.120 | 0.177 | 0.64 | 0.5  | -0.81 | 2.64E-03 | 0.136 | 0.193 | 0.66 | 0.5  | -0.86 | 0.64 | 1.63E-06 | HLA-DQA1                                       | UTR3           |
| 6  | 32611403  | G | A | rs9272987              | 5.16E-05 | 0.123 | 0.180 | 0.64 | 0.5  | -0.81 | 2.57E-03 | 0.137 | 0.194 | 0.66 | 0.5  | -0.86 | 0.65 | 1.63E-06 | HLA-DQA1                                       | UTR3           |
| 6  | 32627812  | C | G | rs9273453              | 2.41E-06 | 0.126 | 0.200 | 0.58 | 0.46 | -0.73 | 2.46E-02 | 0.150 | 0.194 | 0.73 | 0.57 | -0.95 | 0.66 | 1.63E-06 | HLA-DQB1                                       | UTR3           |
| 6  | 32468906  | T | A | rs73731427             | 1.17E-05 | 0.241 | 0.183 | 0.71 | 0.58 | -0.86 | 7.48E-03 | 0.191 | 0.147 | 0.73 | 0.57 | -0.92 | 0.62 | 1.63E-06 | HLA-DRA(dist=56080), HLA-DRB5(dist=16248)      | intergenic     |
| 6  | 32491033  | C | T | rs148638368            | 6.02E-05 | 0.303 | 0.240 | 0.73 | 0.61 | -0.87 | 2.43E-03 | 0.235 | 0.183 | 0.73 | 0.58 | -0.91 | 0.65 | 1.64E-06 | HLA-DRB5                                       | intronic       |
| 6  | 32539391  | T | C | rs9269285              | 5.00E-03 | 0.446 | 0.398 | 0.82 | 0.7  | -0.97 | 1.16E-05 | 0.389 | 0.304 | 0.69 | 0.57 | -0.83 | 0.68 | 1.65E-06 | HLA-DRB6(dist=11612), HLA-DRB1(dist=7156)      | intergenic     |
| 6  | 32628764  | C | T | rs9273536              | 3.87E-06 | 0.132 | 0.205 | 0.59 | 0.46 | -0.74 | 1.88E-02 | 0.152 | 0.198 | 0.73 | 0.56 | -0.94 | 0.66 | 1.65E-06 | HLA-DQB1                                       | intronic       |
| 6  | 32479229  | T | G | rs112337463            | 4.96E-05 | 0.153 | 0.209 | 0.68 | 0.55 | -0.85 | 2.92E-03 | 0.175 | 0.231 | 0.71 | 0.55 | -0.9  | 0.64 | 1.66E-06 | HLA-DRA(dist=66403), HLA-DRB5(dist=5925)       | intergenic     |
| 6  | 32630131  | C | T | rs9274079              | 9.90E-07 | 0.113 | 0.184 | 0.56 | 0.44 | -0.72 | 3.77E-02 | 0.144 | 0.184 | 0.75 | 0.58 | -0.98 | 0.64 | 1.69E-06 | HLA-DQB1                                       | intronic       |
| 6  | 32647313  | A | G | rs28755369             | 3.02E-03 | 0.214 | 0.265 | 0.76 | 0.62 | -0.92 | 2.48E-05 | 0.160 | 0.240 | 0.60 | 0.47 | -0.78 | 0.68 | 1.69E-06 | HLA-DQB1(dist=12847), HLA-DQA2(dist=61850)     | intergenic     |
| 6  | 32459554  | C | A | rs9893879              | 5.93E-05 | 0.089 | 0.132 | 0.65 | 0.49 | -0.86 | 2.36E-03 | 0.098 | 0.142 | 0.65 | 0.48 | -0.89 | 0.66 | 1.70E-06 | HLA-DRA(dist=46728), HLA-DRB5(dist=25600)      | intergenic     |
| 6  | 32456793  | A | G | rs77923331             | 1.08E-05 | 0.307 | 0.374 | 0.74 | 0.62 | -0.88 | 9.78E-03 | 0.346 | 0.402 | 0.79 | 0.65 | -0.96 | 0.67 | 1.71E-06 | HLA-DRA(dist=43967), HLA-DRB5(dist=28361)      | intergenic     |
| 6  | 32630707  | C | T | rs17843716             | 2.41E-06 | 0.100 | 0.164 | 0.56 | 0.43 | -0.73 | 2.34E-02 | 0.126 | 0.162 | 0.74 | 0.56 | -0.98 | 0.62 | 1.72E-06 | HLA-DQB1                                       | intronic       |
| 6  | 32647383  | C | A | rs28755372             | 2.33E-03 | 0.208 | 0.260 | 0.75 | 0.61 | -0.91 | 3.89E-05 | 0.156 | 0.234 | 0.60 | 0.47 | -0.78 | 0.67 | 1.72E-06 | HLA-DQB1(dist=12917), HLA-DQA2(dist=61780)     | intergenic     |
| 6  | 32525674  | A | C | rs72845727             | 4.14E-03 | 0.331 | 0.286 | 0.81 | 0.68 | -0.96 | 2.48E-05 | 0.337 | 0.256 | 0.68 | 0.55 | -0.82 | 0.67 | 1.72E-06 | HLA-DRB6                                       | ncRNA_intronic |
| 6  | 32470011  | C | T | rs113943212            | 6.08E-05 | 0.204 | 0.263 | 0.72 | 0.59 | -0.87 | 2.64E-03 | 0.198 | 0.253 | 0.73 | 0.58 | -0.92 | 0.65 | 1.72E-06 | HLA-DRA(dist=57185), HLA-DRB5(dist=15143)      | intergenic     |
| 6  | 32629091  | C | G | rs9273595              | 3.26E-06 | 0.137 | 0.213 | 0.59 | 0.47 | -0.74 | 2.25E-02 | 0.156 | 0.201 | 0.73 | 0.57 | -0.95 | 0.67 | 1.72E-06 | HLA-DQB1                                       | intronic       |
| 6  | 32526396  | A | G | rs28534491             | 3.09E-05 | 0.245 | 0.187 | 0.71 | 0.59 | -0.86 | 4.40E-03 | 0.180 | 0.136 | 0.71 | 0.56 | -0.91 | 0.62 | 1.72E-06 | HLA-DRB6                                       | ncRNA_intronic |
| 6  | 32647357  | T | C | rs28755371             | 2.29E-03 | 0.209 | 0.261 | 0.75 | 0.61 | -0.91 | 4.00E-05 | 0.156 | 0.234 | 0.60 | 0.47 | -0.78 | 0.68 | 1.73E-06 | HLA-DQB1(dist=12891), HLA-DQA2(dist=61806)     | intergenic     |
| 4  | 124000986 | C | G | rs149416397            | 2.32E-06 | 0.095 | 0.053 | 1.90 | 1.41 | -2.55 | 7.71E-02 | 0.067 | 0.048 | 1.43 | 0.98 | -2.08 | 1.99 | 1.74E-06 | SPATA5                                         | intronic       |
| 4  | 96533629  | T | A | rs60456607             | 1.68E-05 | 0.264 | 0.200 | 1.43 | 1.19 | -1.73 | 2.21E-02 | 0.241 | 0.194 | 1.32 | 1.06 | -1.64 | 1.47 | 1.74E-06 | UNC5C(dist=63268), PDHA2(dist=227610)          | intergenic     |
| 6  | 32484672  | C | T | rs77359414;rs370404320 | 1.00E-05 | 0.331 | 0.401 | 0.74 | 0.62 | -0.88 | 1.02E-02 | 0.384 | 0.437 | 0.80 | 0.66 | -0.97 | 0.67 | 1.78E-06 | HLA-DRB5                                       | downstream     |
| 13 | 48115127  | G | A | rs2406428              | 2.17E-06 | 0.057 | 0.123 | 0.44 | 0.31 | -0.61 | 7.72E-02 | 0.078 | 0.094 | 0.82 | 0.58 | -1.16 | 0.58 | 1.78E-06 | HTR2A(dist=643916), LINC00562(dist=389161)     | intergenic     |
| 6  | 32630687  | G | C | rs17613549             | 2.62E-06 | 0.100 | 0.164 | 0.57 | 0.44 | -0.74 | 2.31E-02 | 0.126 | 0.163 | 0.74 | 0.56 | -0.98 | 0.62 | 1.78E-06 | HLA-DQB1                                       | intronic       |
| 6  | 32631256  | A | G | rs9274239              | 9.94E-06 | 0.132 | 0.200 | 0.61 | 0.48 | -0.77 | 1.21E-02 | 0.130 | 0.172 | 0.72 | 0.54 | -0.95 | 0.65 | 1.80E-06 | HLA-DQB1                                       | intronic       |
| 6  | 32572030  | T | A | rs526784               | 2.73E-05 | 0.153 | 0.221 | 0.64 | 0.51 | -0.79 | 5.43E-03 | 0.156 | 0.212 | 0.69 | 0.53 | -0.89 | 0.67 | 1.81E-06 | HLA-DRB1(dist=14417), HLA-DQA1(dist=33153)     | intergenic     |
| 6  | 32540742  | C | T | rs9269367              | 9.29E-06 | 0.415 | 0.352 | 0.76 | 0.65 | -0.9  | 9.99E-03 | 0.430 | 0.373 | 0.79 | 0.65 | -0.95 | 0.66 | 1.81E-06 | HLA-DRB6(dist=12963), HLA-DRB5(dist=5805)      | intergenic     |
| 6  | 32644562  | G | A | rs28755240             | 4.24E-03 | 0.211 | 0.260 | 0.76 | 0.62 | -0.93 | 1.66E-05 | 0.156 | 0.238 | 0.59 | 0.46 | -0.77 | 0.68 | 1.85E-06 | HLA-DQB1(dist=10096), HLA-DQA2(dist=64601)     | intergenic     |
| 6  | 32628699  | A | G | rs38669574;rs9273530   | 4.60E-06 | 0.131 | 0.205 | 0.59 | 0.47 | -0.74 | 1.87E-02 | 0.152 | 0.198 | 0.73 | 0.56 | -0.94 | 0.66 | 1.85E-06 | HLA-DQB1                                       | intronic       |
| 6  | 32628698  | C | T | rs9273529;rs38669574   | 4.60E-06 | 0.131 | 0.205 | 0.59 | 0.47 | -0.74 | 1.87E-02 | 0.152 | 0.198 | 0.73 | 0.56 | -0.94 | 0.66 | 1.85E-06 | HLA-DQB1                                       | intronic       |
| 6  | 32485410  | T | C | rs151002802            | 5.31E-05 | 0.423 | 0.362 | 0.77 | 0.66 | -0.91 | 3.05E-03 | 0.302 | 0.246 | 0.76 | 0.62 | -0.93 | 0.65 | 1.86E-06 | HLA-DRB5(NM_002125:c.*106C>A)                  | UTR3           |
| 6  | 32628407  | T | C | rs9273504              | 3.67E-06 | 0.137 | 0.213 | 0.59 | 0.47 | -0.74 | 2.24E-02 | 0.156 | 0.201 | 0.73 | 0.57 | -0.95 | 0.67 | 1.87E-06 | HLA-DQB1                                       | intronic       |
| 6  | 32645626  | A | C | rs28755279             | 4.40E-03 | 0.208 | 0.256 | 0.77 | 0.63 | -0.93 | 1.69E-05 | 0.160 | 0.243 | 0.59 | 0.46 | -0.76 | 0.68 | 1.88E-06 | HLA-DQB1(dist=11160), HLA-DQA2(dist=63537)     | intergenic     |
| 6  | 32489204  | G | A | rs114828939            | 4.09E-05 | 0.290 | 0.229 | 0.73 | 0.61 | -0.87 | 3.64E-03 | 0.204 | 0.152 | 0.70 | 0.56 | -0.89 | 0.64 | 1.88E-06 | HLA-DRB5                                       | intronic       |
| 13 | 48092853  | G | A | rs9595729              | 1.03E-06 | 0.050 | 0.116 | 0.40 | 0.28 | -0.57 | 1.11E-01 | 0.077 | 0.091 | 0.84 | 0.59 | -1.19 | 0.58 | 1.89E-06 | HTR2A(dist=621642), LINC00562(dist=411435)     | intergenic     |
| 6  | 32455358  | C | T | rs116615641            | 2.03E-05 | 0.255 | 0.312 | 0.75 | 0.63 | -0.9  | 5.13E-03 | 0.317 | 0.372 | 0.79 | 0.64 | -0.96 | 0.65 | 1.90E-06 | HLA-DRA(dist=42532), HLA-DRB5(dist=29796)      | intergenic     |
| 6  | 32479282  | C | T | rs116597030            | 5.27E-05 | 0.311 | 0.251 | 0.74 | 0.62 | -0.89 | 3.15E-03 | 0.246 | 0.195 | 0.74 | 0.6  | -0.92 | 0.64 | 1.90E-06 | HLA-DRA(dist=66456), HLA-DRB5(dist=5872)       | intergenic     |
| 6  | 32537028  | C | T | rs114170927            | 3.22E-03 | 0.371 | 0.320 | 0.80 | 0.67 | -0.95 | 3.15E-05 | 0.349 | 0.267 | 0.68 | 0.56 | -0.83 | 0.68 | 1.91E-06 | HLA-DRB6(dist=9249), HLA-DRB1(dist=9519)       | intergenic     |
| 6  | 32647803  | T | G | rs28371236             | 2.25E-03 | 0.200 | 0.250 | 0.75 | 0.61 | -0.92 | 4.82E-05 | 0.157 | 0.234 | 0.61 | 0.47 | -0.79 | 0.67 | 1.92E-06 | HLA-DQB1(dist=13337), HLA-DQA2(dist=61360)     | intergenic     |
| 6  | 32461281  | T | A | rs111506838            | 1.76E-06 | 0.198 | 0.262 | 0.69 | 0.57 | -0.85 | 2.68E-02 | 0.251 | 0.299 | 0.78 | 0.63 | -0.97 | 0.65 | 1.92E-06 | HLA-DRA(dist=48455), HLA-DRB5(dist=23873)      | intergenic     |
| 6  | 32644670  | G | C | rs28755246             | 3.83E-03 | 0.208 | 0.258 | 0.76 | 0.62 | -0.92 | 2.06E-05 | 0.152 | 0.232 | 0.59 | 0.46 | -0.7  |      |          |                                                |                |

|    |          |   |    |                         |          |       |       |      |      |       |          |       |       |      |      |       |      |          |                                            |            |
|----|----------|---|----|-------------------------|----------|-------|-------|------|------|-------|----------|-------|-------|------|------|-------|------|----------|--------------------------------------------|------------|
| 6  | 32587117 | C | G  | rs28383313              | 4.58E-05 | 0.166 | 0.235 | 0.65 | 0.52 | -0.8  | 3.92E-03 | 0.165 | 0.224 | 0.68 | 0.53 | -0.88 | 0.68 | 2.00E-06 | HLA-DRB1(dist=29504), HLA-DQA1(dist=18066) | intergenic |
| 6  | 32543171 | A | C  | rs34099950              | 6.15E-05 | 0.084 | 0.130 | 0.61 | 0.46 | -0.81 | 2.82E-03 | 0.103 | 0.153 | 0.64 | 0.47 | -0.87 | 0.59 | 2.02E-06 | HLA-DRB6(dist=15392), HLA-DRB1(dist=3376)  | intergenic |
| 6  | 32484743 | A | T  | rs113169828;rs200756912 | 8.23E-06 | 0.391 | 0.462 | 0.75 | 0.63 | -0.88 | 1.22E-02 | 0.523 | 0.467 | 0.80 | 0.66 | -0.96 | 0.69 | 2.06E-06 | HLA-DRB5                                   | downstream |
| 6  | 32541123 | C | T  | rs9269390               | 2.93E-03 | 0.379 | 0.327 | 0.80 | 0.67 | -0.94 | 3.70E-05 | 0.362 | 0.281 | 0.69 | 0.57 | -0.84 | 0.68 | 2.06E-06 | HLA-DRB6(dist=13344), HLA-DRB1(dist=5424)  | intergenic |
| 6  | 32608507 | A | C  | rs28383417              | 6.19E-05 | 0.119 | 0.177 | 0.63 | 0.49 | -0.81 | 2.99E-03 | 0.126 | 0.178 | 0.66 | 0.5  | -0.88 | 0.64 | 2.07E-06 | HLA-DQA1                                   | intronic   |
| 6  | 32644658 | G | T  | rs28755245              | 3.75E-03 | 0.208 | 0.258 | 0.76 | 0.62 | -0.92 | 2.36E-05 | 0.152 | 0.232 | 0.60 | 0.46 | -0.77 | 0.68 | 2.08E-06 | HLA-DQB1(dist=10192), HLA-DQA2(dist=64505) | intergenic |
| 6  | 32644869 | A | T  | rs28755253              | 3.48E-03 | 0.212 | 0.261 | 0.76 | 0.62 | -0.93 | 2.77E-05 | 0.162 | 0.242 | 0.60 | 0.47 | -0.78 | 0.68 | 2.08E-06 | HLA-DQB1(dist=10403), HLA-DQA2(dist=64294) | intergenic |
| 6  | 32498885 | T | C  | rs78569932              | 4.73E-05 | 0.277 | 0.220 | 0.74 | 0.61 | -0.89 | 3.72E-03 | 0.206 | 0.158 | 0.72 | 0.57 | -0.91 | 0.63 | 2.08E-06 | HLA-DRB5                                   | upstream   |
| 6  | 32631584 | T | C  | NA                      | 8.67E-06 | 0.120 | 0.184 | 0.60 | 0.47 | -0.77 | 1.35E-02 | 0.128 | 0.169 | 0.72 | 0.55 | -0.95 | 0.64 | 2.09E-06 | HLA-DQA1(dist=3992), HLA-DQB1(dist=11820)  | intergenic |
| 6  | 32479668 | G | A  | rs73729754              | 6.34E-05 | 0.274 | 0.216 | 0.73 | 0.61 | -0.88 | 2.85E-03 | 0.208 | 0.156 | 0.71 | 0.56 | -0.89 | 0.64 | 2.09E-06 | HLA-DRA(dist=66842), HLA-DRB5(dist=5486)   | intergenic |
| 6  | 32630700 | A | C  | rs17843715              | 3.20E-06 | 0.100 | 0.164 | 0.57 | 0.44 | -0.74 | 2.32E-02 | 0.126 | 0.162 | 0.74 | 0.56 | -0.98 | 0.62 | 2.09E-06 | HLA-DQB1                                   | intronic   |
| 6  | 32482481 | T | C  | rs111537693             | 2.49E-05 | 0.301 | 0.237 | 0.72 | 0.6  | -0.87 | 6.24E-03 | 0.240 | 0.193 | 0.76 | 0.61 | -0.94 | 0.65 | 2.11E-06 | HLA-DRA(dist=69655), HLA-DRB5(dist=2673)   | intergenic |
| 6  | 32507548 | G | A  | rs67542250              | 5.18E-05 | 0.272 | 0.214 | 0.73 | 0.6  | -0.87 | 3.43E-03 | 0.210 | 0.159 | 0.71 | 0.56 | -0.89 | 0.64 | 2.11E-06 | HLA-DRB5(dist=9542), HLA-DRB6(dist=12942)  | intergenic |
| 13 | 48076943 | C | T  | rs7331318               | 8.41E-07 | 0.049 | 0.116 | 0.40 | 0.28 | -0.57 | 1.40E-01 | 0.079 | 0.091 | 0.86 | 0.61 | -1.21 | 0.58 | 2.14E-06 | HTR2A(dist=605732), LINC00562(dist=427345) | intergenic |
| 6  | 32532055 | G | C  | rs34492489;rs72845775   | 2.61E-05 | 0.273 | 0.213 | 0.72 | 0.6  | -0.87 | 5.47E-03 | 0.222 | 0.173 | 0.73 | 0.59 | -0.92 | 0.64 | 2.15E-06 | HLA-DRB6(dist=4276), HLA-DRB1(dist=14492)  | intergenic |
| 6  | 32647012 | A | G  | rs28755351              | 2.46E-03 | 0.209 | 0.260 | 0.75 | 0.62 | -0.92 | 5.19E-05 | 0.178 | 0.257 | 0.62 | 0.49 | -0.79 | 0.68 | 2.18E-06 | HLA-DQB1(dist=12546), HLA-DQA2(dist=62151) | intergenic |
| 6  | 32647816 | T | G  | rs28371237              | 2.48E-03 | 0.196 | 0.245 | 0.75 | 0.61 | -0.91 | 4.99E-05 | 0.146 | 0.222 | 0.60 | 0.46 | -0.78 | 0.67 | 2.18E-06 | HLA-DQB1(dist=13350), HLA-DQA2(dist=61347) | intergenic |
| 6  | 32628256 | G | T  | rs9273494               | 3.69E-06 | 0.139 | 0.215 | 0.59 | 0.47 | -0.74 | 2.53E-02 | 0.158 | 0.202 | 0.74 | 0.57 | -0.95 | 0.67 | 2.19E-06 | HLA-DQB1                                   | intronic   |
| 8  | 73819016 | G | C  | rs114147012             | 5.40E-03 | 0.069 | 0.049 | 1.42 | 1.02 | -1.98 | 3.31E-05 | 0.081 | 0.042 | 2.02 | 1.42 | -2.87 | 2.20 | 2.19E-06 | KCNB2                                      | intronic   |
| 6  | 32645599 | A | G  | rs28755278              | 3.16E-03 | 0.209 | 0.258 | 0.76 | 0.62 | -0.92 | 3.44E-05 | 0.161 | 0.241 | 0.61 | 0.47 | -0.78 | 0.68 | 2.19E-06 | HLA-DQB1(dist=11133), HLA-DQA2(dist=63564) | intergenic |
| 6  | 32460157 | T | C  | rs113255123;rs199673613 | 4.07E-05 | 0.189 | 0.250 | 0.70 | 0.57 | -0.85 | 4.70E-03 | 0.232 | 0.290 | 0.74 | 0.59 | -0.92 | 0.66 | 2.20E-06 | HLA-DRA(dist=47331), HLA-DRB5(dist=24997)  | intergenic |
| 6  | 32484706 | A | G  | rs62405576              | 5.81E-06 | 0.421 | 0.495 | 0.74 | 0.63 | -0.88 | 1.65E-02 | 0.500 | 0.449 | 0.81 | 0.67 | -0.98 | 0.68 | 2.20E-06 | HLA-DRB5                                   | downstream |
| 6  | 32455345 | T | C  | rs145126112             | 1.99E-06 | 0.275 | 0.345 | 0.72 | 0.6  | -0.86 | 3.26E-02 | 0.333 | 0.381 | 0.81 | 0.67 | -0.99 | 0.67 | 2.20E-06 | HLA-DRA(dist=42519), HLA-DRB5(dist=29809)  | intergenic |
| 6  | 32646588 | G | A  | rs28755326              | 2.73E-03 | 0.205 | 0.254 | 0.75 | 0.62 | -0.92 | 4.46E-05 | 0.158 | 0.236 | 0.61 | 0.47 | -0.78 | 0.68 | 2.20E-06 | HLA-DQB1(dist=12122), HLA-DQA2(dist=62575) | intergenic |
| 6  | 32644983 | G | A  | rs28755259              | 3.43E-03 | 0.189 | 0.236 | 0.76 | 0.62 | -0.93 | 3.47E-05 | 0.166 | 0.246 | 0.61 | 0.48 | -0.78 | 0.67 | 2.20E-06 | HLA-DQB1(dist=10517), HLA-DQA2(dist=64180) | intergenic |
| 6  | 32456364 | T | A  | rs76090041              | 1.65E-05 | 0.390 | 0.458 | 0.76 | 0.64 | -0.89 | 8.52E-03 | 0.525 | 0.471 | 0.81 | 0.67 | -0.97 | 0.68 | 2.21E-06 | HLA-DRA(dist=43538), HLA-DRB5(dist=28790)  | intergenic |
| 6  | 32628998 | T | C  | rs38669577;rs9273561    | 3.70E-06 | 0.158 | 0.210 | 0.59 | 0.47 | -0.74 | 2.49E-02 | 0.158 | 0.202 | 0.74 | 0.57 | -0.96 | 0.67 | 2.22E-06 | HLA-DQB1                                   | intronic   |
| 13 | 48070850 | G | T  | rs74073872              | 8.77E-07 | 0.049 | 0.115 | 0.40 | 0.28 | -0.57 | 1.41E-01 | 0.079 | 0.091 | 0.86 | 0.61 | -1.21 | 0.58 | 2.23E-06 | HTR2A(dist=599639), LINC00562(dist=433438) | intergenic |
| 6  | 32647280 | G | C  | rs28755368              | 2.87E-03 | 0.212 | 0.263 | 0.75 | 0.62 | -0.92 | 3.97E-05 | 0.156 | 0.235 | 0.60 | 0.47 | -0.78 | 0.68 | 2.24E-06 | HLA-DQB1(dist=12814), HLA-DQA2(dist=61883) | intergenic |
| 6  | 32501015 | T | C  | rs115654776             | 6.41E-05 | 0.228 | 0.175 | 0.72 | 0.59 | -0.88 | 2.85E-03 | 0.195 | 0.146 | 0.70 | 0.55 | -0.89 | 0.62 | 2.25E-06 | HLA-DRB5(dist=3009), HLA-DRB6(dist=19475)  | intergenic |
| 13 | 48089493 | A | C  | rs9595727               | 1.17E-06 | 0.050 | 0.115 | 0.40 | 0.28 | -0.57 | 1.19E-01 | 0.078 | 0.091 | 0.84 | 0.6  | -1.19 | 0.58 | 2.26E-06 | HTR2A(dist=618282), LINC00562(dist=414795) | intergenic |
| 6  | 32647728 | G | C  | rs283711229             | 2.89E-03 | 0.207 | 0.256 | 0.76 | 0.62 | -0.92 | 4.22E-05 | 0.153 | 0.230 | 0.60 | 0.47 | -0.78 | 0.68 | 2.27E-06 | HLA-DQB1(dist=13262), HLA-DQA2(dist=61435) | intergenic |
| 6  | 32644878 | T | C  | rs28755254              | 2.88E-03 | 0.209 | 0.259 | 0.76 | 0.62 | -0.92 | 4.17E-05 | 0.161 | 0.240 | 0.61 | 0.47 | -0.78 | 0.68 | 2.27E-06 | HLA-DQB1(dist=10412), HLA-DQA2(dist=64285) | intergenic |
| 6  | 32647786 | A | G  | rs28371235              | 2.63E-03 | 0.196 | 0.246 | 0.75 | 0.61 | -0.92 | 4.86E-05 | 0.146 | 0.222 | 0.60 | 0.46 | -0.78 | 0.67 | 2.27E-06 | HLA-DQB1(dist=13320), HLA-DQA2(dist=61377) | intergenic |
| 6  | 32630814 | C | NA |                         | 6.43E-06 | 0.108 | 0.171 | 0.59 | 0.45 | -0.76 | 1.88E-02 | 0.121 | 0.159 | 0.73 | 0.55 | -0.97 | 0.63 | 2.29E-06 | HLA-DQA1(dist=3992), HLA-DQB1(dist=11820)  | intergenic |
| 6  | 32569205 | G | A  | rs9270788               | 3.43E-03 | 0.388 | 0.338 | 0.81 | 0.68 | -0.96 | 3.69E-05 | 0.381 | 0.300 | 0.70 | 0.57 | -0.84 | 0.69 | 2.29E-06 | HLA-DRB1(dist=11592), HLA-DQA1(dist=35978) | intergenic |
| 6  | 32508204 | T | G  | rs67342127              | 7.79E-06 | 0.321 | 0.253 | 0.72 | 0.6  | -0.86 | 1.49E-02 | 0.264 | 0.219 | 0.78 | 0.63 | -0.97 | 0.65 | 2.29E-06 | HLA-DRB5(dist=10198), HLA-DRB6(dist=12286) | intergenic |
| 6  | 32569852 | G | A  | rs622137                | 4.42E-05 | 0.161 | 0.230 | 0.65 | 0.52 | -0.8  | 4.81E-03 | 0.154 | 0.210 | 0.68 | 0.53 | -0.88 | 0.68 | 2.29E-06 | HLA-DRB1(dist=12239), HLA-DQA1(dist=35331) | intergenic |
| 6  | 32514302 | A | G  | rs67571763              | 5.17E-05 | 0.252 | 0.198 | 0.73 | 0.61 | -0.89 | 3.41E-03 | 0.201 | 0.152 | 0.71 | 0.56 | -0.9  | 0.63 | 2.31E-06 | HLA-DRB5(dist=16296), HLA-DRB6(dist=6188)  | intergenic |
| 6  | 32610863 | A | G  | rs9272914               | 4.77E-05 | 0.117 | 0.173 | 0.63 | 0.5  | -0.81 | 3.89E-03 | 0.138 | 0.191 | 0.68 | 0.52 | -0.88 | 0.65 | 2.32E-06 | HLA-DQA1(NM_002122:c.*155A>G)              | UTR3       |
| 13 | 48085819 | C | T  | rs74073877              | 1.10E-06 | 0.050 | 0.115 | 0.40 | 0.28 | -0.57 | 1.27E-01 | 0.078 | 0.091 | 0.85 | 0.6  | -1.2  | 0.58 | 2.32E-06 | HTR2A(dist=614608), LINC00562(dist=418469) | intergenic |
| 6  | 32647546 | G | A  | rs28371220              | 2.90E-03 | 0.212 | 0.263 | 0.75 | 0.62 | -0.92 | 4.17E-05 | 0.155 | 0.233 | 0.60 | 0.47 | -0.78 | 0.68 | 2.35E-06 | HLA-DQB1(dist=13080), HLA-DQA2(dist=61617) | intergenic |
| 6  | 32647556 | G | C  | rs28371221              | 2.90E-03 | 0.212 | 0.263 | 0.75 | 0.62 | -0.92 | 4.17E-05 | 0.155 | 0.233 | 0.60 | 0.47 | -0.78 | 0.68 | 2.35E-06 | HLA-DQB1(dist=13090), HLA-DQA2(dist=61607) | intergenic |
| 6  | 32641142 | C | A  | rs9274888               | 7.59E-03 | 0.144 | 0.183 | 0.75 | 0.6  | -0.94 | 1.53E-05 | 0.128 | 0.207 | 0.56 | 0.43 | -0.74 | 0.65 | 2.37E-06 | HLA-DQB1(dist=6676), HLA-DQA2(dist=68021)  | intergenic |
| 6  | 32541296 | A | G  | rs9269398               | 2.64E-05 | 0.543 | 0.474 | 0.76 | 0.64 | -0.89 | 5.67E-03 | 0.517 | 0.455 | 0.78 | 0.65 | -0.94 | 0.68 | 2.37E-06 | HLA-DRB6(dist=13517), HLA-DRB1(dist=5251)  | intergenic |
| 6  | 32605418 | G | A  | rs9272443               | 5.99E-05 | 0.143 | 0.205 | 0.65 | 0.52 | -0.81 | 3.70E-03 | 0.135 | 0.188 | 0.67 | 0.51 | -0.88 | 0.66 | 2.37E-06 | HLA-DQA1                                   | intronic   |
| 6  | 32647779 | C | A  | rs28371234              | 2.72E-03 | 0.195 | 0.245 | 0.75 | 0.61 | -0.92 | 4.93E-05 | 0.146 | 0.222 | 0.60 | 0.46 | -0.78 | 0.67 | 2.38E-06 | HLA-DQB1(dist=13313), HLA-DQA2(dist=61384) | intergenic |
| 6  | 32628873 | C | T  | rs9273549               | 4.56E-06 | 0.127 | 0.198 | 0.59 | 0.46 | -0.75 | 2.15E-02 | 0.156 | 0.201 | 0.73 | 0.57 | -0.95 | 0.67 | 2.39E-06 | HLA-DQB1                                   | intronic   |
| 6  | 32456339 | G | A  | rs78486723              | 1.42E-05 | 0.397 | 0.466 | 0.75 | 0.64 | -0.89 | 1.02E-02 | 0.527 | 0.473 | 0.81 | 0.67 | -0.97 | 0.68 | 2.40E-06 | HLA-DRA(dist=43513), HLA-DRB5(dist=28815)  | intergenic |
| 6  | 32632275 | G | A  | rs9274334               | 1.87E-05 | 0.114 | 0.172 | 0.62 | 0.48 | -0.79 | 8.70E-03 | 0.123 | 0.162 | 0.72 | 0.54 | -0.96 | 0.62 | 2.40E-06 | HLA-DQB1                                   | intronic   |
| 6  | 32536968 | G | A  | rs75895939              | 7.03E-03 | 0.350 | 0.301 | 0.80 | 0.68 | -0.95 | 1.25E-05 | 0.348 | 0.263 | 0.67 | 0.55 | -0.82 | 0.68 | 2.41E-06 | HLA-DRB6(dist=9189), HLA-DRB1(dist=9579)   | intergenic |
| 6  | 32644958 | T | C  | rs28755258              | 3.37E-03 | 0.185 | 0.232 | 0.76 | 0.61 | -0.93 | 4.07E-05 | 0.156 | 0.233 | 0.60 | 0.47 | -0.78 | 0.67 | 2.43E-06 | HLA-DQB1(dist=10492), HLA-DQA2(dist=64205) | intergenic |
| 6  | 32646145 | A | G  | rs28755303              | 3.75E-03 | 0.187 | 0.233 | 0.76 | 0.62 | -0.93 | 3.82E-05 | 0.155 | 0.233 | 0.61 | 0.47 | -0.78 | 0.67 | 2.45E-06 | HLA-DQB1(dist=11679), HLA-DQA2(dist=63018) | intergenic |
| 6  | 32501169 | C | T  | rs113972770             | 5.71E-05 | 0.210 | 0.159 | 0.71 | 0.58 | -0.87 | 3.33E-03 | 0.182 | 0.135 | 0.70 | 0.55 | -0.9  | 0.61 | 2.46E-06 | HLA-DRB5(dist=3163), HLA-DRB6(dist=19321)  | intergenic |
| 6  | 32645906 | A | G  | rs28755291              | 3.24E-03 | 0.209 | 0.258 | 0.76 | 0.62 | -0.92 | 3.92E-05 | 0.160 | 0.240 | 0.61 | 0.47 | -0.78 | 0.68 | 2.46E-06 | HLA-DQB1(dist=11440), HLA-DQA2(dist=63257) | intergenic |
| 6  | 32496249 | A | G  | rs11460574              | 3.63E-05 |       |       |      |      |       |          |       |       |      |      |       |      |          |                                            |            |

|    |           |   |   |                        |          |       |       |      |      |       |          |       |       |      |      |       |      |          |                                            |            |
|----|-----------|---|---|------------------------|----------|-------|-------|------|------|-------|----------|-------|-------|------|------|-------|------|----------|--------------------------------------------|------------|
| 6  | 32628779  | G | T | rs9273539              | 6.36E-06 | 0.123 | 0.192 | 0.59 | 0.47 | -0.75 | 1.87E-02 | 0.152 | 0.198 | 0.73 | 0.56 | -0.94 | 0.66 | 2.61E-06 | HLA-DQB1                                   | intronic   |
| 6  | 32646604  | G | A | rs28755327             | 3.25E-03 | 0.202 | 0.250 | 0.76 | 0.62 | -0.93 | 4.56E-05 | 0.158 | 0.235 | 0.61 | 0.47 | -0.78 | 0.67 | 2.62E-06 | HLA-DQB1(dist=12138), HLA-DQA2(dist=62559) | intergenic |
| 8  | 51993654  | C | T | rs11995669             | 6.98E-03 | 0.049 | 0.033 | 1.47 | 0.99 | -2.18 | 4.18E-05 | 0.068 | 0.035 | 2.02 | 1.38 | -2.97 | 2.61 | 2.64E-06 | SNTG1(dist=286976), PXdNL(dist=238483)     | intergenic |
| 6  | 32643953  | A | T | rs28755204             | 3.99E-03 | 0.218 | 0.267 | 0.77 | 0.63 | -0.93 | 3.32E-05 | 0.166 | 0.245 | 0.62 | 0.48 | -0.79 | 0.68 | 2.64E-06 | HLA-DQB1(dist=9487), HLA-DQA2(dist=65210)  | intergenic |
| 6  | 3245520   | G | C | rs75353909             | 2.24E-05 | 0.428 | 0.498 | 0.75 | 0.64 | -0.89 | 8.70E-03 | 0.535 | 0.475 | 0.79 | 0.65 | -0.95 | 0.69 | 2.65E-06 | HLA-DRA(dist=42694), HLA-DRB5(dist=29634)  | intergenic |
| 6  | 32538791  | C | T | rs113222119            | 6.28E-05 | 0.313 | 0.369 | 0.78 | 0.66 | -0.93 | 3.68E-03 | 0.277 | 0.336 | 0.76 | 0.61 | -0.93 | 0.65 | 2.66E-06 | HLA-DRB6(dist=11012), HLA-DRB1(dist=7756)  | intergenic |
| 18 | 39668806  | G | T | rs145651100            | 2.10E-06 | 0.046 | 0.022 | 2.17 | 1.42 | -3.33 | 9.94E-02 | 0.037 | 0.026 | 1.45 | 0.88 | -2.4  | 3.19 | 2.66E-06 | PIK3C3(dist=7360), LINC00907(dist=97827)   | intergenic |
| 6  | 32640918  | C | G | rs9274879              | 2.81E-03 | 0.155 | 0.204 | 0.71 | 0.57 | -0.89 | 5.65E-05 | 0.137 | 0.212 | 0.59 | 0.45 | -0.78 | 0.67 | 2.67E-06 | HLA-DQB1(dist=6452), HLA-DQA2(dist=68245)  | intergenic |
| 6  | 32488132  | A | C | rs72508437             | 2.82E-05 | 0.246 | 0.190 | 0.72 | 0.59 | -0.87 | 6.63E-03 | 0.185 | 0.142 | 0.73 | 0.57 | -0.93 | 0.62 | 2.67E-06 | HLA-DRB5                                   | intronic   |
| 6  | 32630178  | G | A | rs9274107              | 2.05E-06 | 0.098 | 0.162 | 0.56 | 0.43 | -0.74 | 2.87E-02 | 0.141 | 0.181 | 0.74 | 0.57 | -0.97 | 0.63 | 2.69E-06 | HLA-DQB1                                   | intronic   |
| 13 | 48067790  | G | A | rs111454897            | 1.08E-06 | 0.049 | 0.114 | 0.40 | 0.28 | -0.57 | 1.44E-01 | 0.079 | 0.091 | 0.86 | 0.61 | -1.21 | 0.58 | 2.69E-06 | HTR2A(dist=596579), LINC00562(dist=436498) | intergenic |
| 6  | 32459289  | A | G | rs188621671            | 2.84E-06 | 0.261 | 0.331 | 0.72 | 0.6  | -0.86 | 3.37E-02 | 0.299 | 0.341 | 0.82 | 0.67 | -1.01 | 0.66 | 2.69E-06 | HLA-DRA(dist=46463), HLA-DRB5(dist=25865)  | intergenic |
| 6  | 32541775  | A | C | rs113676040            | 3.29E-05 | 0.064 | 0.106 | 0.58 | 0.42 | -0.8  | 6.13E-03 | 0.079 | 0.118 | 0.64 | 0.46 | -0.91 | 0.55 | 2.70E-06 | HLA-DRB6(dist=13996), HLA-DRB1(dist=4772)  | intergenic |
| 6  | 32608322  | T | C | rs9272644              | 5.71E-05 | 0.300 | 0.235 | 0.71 | 0.6  | -0.86 | 4.02E-03 | 0.270 | 0.210 | 0.72 | 0.58 | -0.89 | 0.68 | 2.71E-06 | HLA-DQA1                                   | intronic   |
| 6  | 32647411  | G | C | rs28755375             | 3.17E-03 | 0.210 | 0.260 | 0.76 | 0.62 | -0.92 | 4.55E-05 | 0.154 | 0.231 | 0.61 | 0.47 | -0.78 | 0.68 | 2.71E-06 | HLA-DQB1(dist=12945), HLA-DQA2(dist=61752) | intergenic |
| 6  | 32455544  | A | G | rs192117946            | 1.46E-05 | 0.351 | 0.419 | 0.75 | 0.63 | -0.89 | 1.14E-02 | 0.430 | 0.486 | 0.80 | 0.66 | -0.96 | 0.68 | 2.71E-06 | HLA-DRA(dist=42718), HLA-DRB5(dist=29610)  | intergenic |
| 6  | 32647412  | G | A | rs28755376             | 3.17E-03 | 0.210 | 0.260 | 0.76 | 0.62 | -0.92 | 4.57E-05 | 0.154 | 0.231 | 0.61 | 0.47 | -0.78 | 0.68 | 2.72E-06 | HLA-DQB1(dist=12946), HLA-DQA2(dist=61751) | intergenic |
| 6  | 32641148  | G | A | rs9274890              | 8.17E-03 | 0.144 | 0.183 | 0.75 | 0.6  | -0.94 | 1.64E-05 | 0.128 | 0.206 | 0.56 | 0.43 | -0.74 | 0.65 | 2.72E-06 | HLA-DQB1(dist=6682), HLA-DQA2(dist=68015)  | intergenic |
| 6  | 32641161  | A | G | rs9274892              | 8.22E-03 | 0.142 | 0.181 | 0.75 | 0.59 | -0.94 | 1.64E-05 | 0.128 | 0.206 | 0.56 | 0.43 | -0.74 | 0.65 | 2.73E-06 | HLA-DQB1(dist=6695), HLA-DQA2(dist=68002)  | intergenic |
| 6  | 32486943  | T | G | rs114195502            | 1.22E-05 | 0.349 | 0.283 | 0.74 | 0.62 | -0.88 | 1.34E-02 | 0.266 | 0.220 | 0.78 | 0.63 | -0.96 | 0.65 | 2.73E-06 | HLA-DRB5                                   | intronic   |
| 6  | 32488545  | G | C | rs143375763            | 3.52E-05 | 0.327 | 0.265 | 0.74 | 0.62 | -0.89 | 6.08E-03 | 0.243 | 0.196 | 0.76 | 0.61 | -0.94 | 0.65 | 2.76E-06 | HLA-DRB5                                   | intronic   |
| 6  | 32474961  | C | T | rs111832132            | 1.52E-05 | 0.186 | 0.248 | 0.69 | 0.56 | -0.85 | 1.20E-02 | 0.225 | 0.276 | 0.76 | 0.61 | -0.95 | 0.66 | 2.76E-06 | HLA-DRA(dist=62135), HLA-DRB5(dist=10193)  | intergenic |
| 6  | 32643894  | T | G | rs28755202             | 4.11E-03 | 0.217 | 0.266 | 0.77 | 0.63 | -0.93 | 3.38E-05 | 0.165 | 0.243 | 0.62 | 0.48 | -0.79 | 0.68 | 2.77E-06 | HLA-DQB1(dist=9428), HLA-DQA2(dist=65269)  | intergenic |
| 6  | 32569691  | G | A | rs477515               | 5.66E-05 | 0.162 | 0.229 | 0.65 | 0.52 | -0.81 | 4.74E-03 | 0.154 | 0.210 | 0.68 | 0.53 | -0.88 | 0.68 | 2.79E-06 | HLA-DRB1(dist=12078), HLA-DQA1(dist=35492) | intergenic |
| 6  | 32645695  | G | T | rs115932399            | 4.13E-03 | 0.208 | 0.256 | 0.77 | 0.63 | -0.93 | 3.34E-05 | 0.169 | 0.249 | 0.61 | 0.48 | -0.78 | 0.68 | 2.80E-06 | HLA-DQB1(dist=11229), HLA-DQA2(dist=63468) | intergenic |
| 6  | 32543202  | T | A | rs35651166             | 5.24E-05 | 0.088 | 0.135 | 0.62 | 0.47 | -0.82 | 4.50E-03 | 0.112 | 0.160 | 0.66 | 0.49 | -0.89 | 0.60 | 2.80E-06 | HLA-DRB6(dist=15423), HLA-DRB1(dist=3345)  | intergenic |
| 6  | 32474548  | C | T | rs183295178            | 2.54E-05 | 0.235 | 0.296 | 0.73 | 0.6  | -0.88 | 7.31E-03 | 0.275 | 0.332 | 0.76 | 0.62 | -0.94 | 0.67 | 2.81E-06 | HLA-DRA(dist=61722), HLA-DRB5(dist=10606)  | intergenic |
| 6  | 117622150 | A | C | rs210968               | 1.55E-03 | 0.069 | 0.043 | 1.64 | 1.17 | -2.3  | 3.92E-05 | 0.076 | 0.043 | 1.83 | 1.27 | -2.62 | 2.28 | 2.85E-06 | ROS1                                       | exonic     |
| 13 | 48065294  | T | A | rs9595725              | 1.17E-06 | 0.048 | 0.114 | 0.40 | 0.28 | -0.57 | 1.44E-01 | 0.079 | 0.091 | 0.86 | 0.61 | -1.21 | 0.58 | 2.86E-06 | HTR2A(dist=594083), LINC00562(dist=438994) | intergenic |
| 16 | 61169037  | C | T | rs187205212            | 3.25E-05 | 0.086 | 0.053 | 1.68 | 1.24 | -2.28 | 2.05E-02 | 0.067 | 0.045 | 1.51 | 1.03 | -2.22 | 2.18 | 2.87E-06 | MIR4426(dist=79367), CDH8(dist=516878)     | intergenic |
| 6  | 32644631  | G | A | rs28755244             | 3.61E-03 | 0.211 | 0.261 | 0.76 | 0.62 | -0.92 | 3.82E-05 | 0.152 | 0.230 | 0.60 | 0.47 | -0.78 | 0.68 | 2.88E-06 | HLA-DQB1(dist=10165), HLA-DQA2(dist=64532) | intergenic |
| 6  | 32647404  | C | T | rs28755374             | 3.36E-03 | 0.211 | 0.261 | 0.76 | 0.62 | -0.92 | 4.50E-05 | 0.154 | 0.231 | 0.60 | 0.47 | -0.78 | 0.68 | 2.89E-06 | HLA-DQB1(dist=12938), HLA-DQA2(dist=61759) | intergenic |
| 6  | 32641165  | C | T | rs9274893              | 8.34E-03 | 0.143 | 0.182 | 0.75 | 0.6  | -0.94 | 1.75E-05 | 0.128 | 0.206 | 0.57 | 0.43 | -0.75 | 0.65 | 2.90E-06 | HLA-DQB1(dist=6699), HLA-DQA2(dist=67998)  | intergenic |
| 6  | 32489008  | C | T | rs115260061            | 5.61E-05 | 0.307 | 0.247 | 0.74 | 0.62 | -0.89 | 4.54E-03 | 0.211 | 0.163 | 0.73 | 0.58 | -0.91 | 0.64 | 2.90E-06 | HLA-DRB5                                   | intronic   |
| 6  | 32644577  | A | G | rs28755242;rs201933833 | 4.57E-03 | 0.230 | 0.258 | 0.76 | 0.63 | -0.93 | 2.76E-05 | 0.152 | 0.231 | 0.60 | 0.46 | -0.77 | 0.68 | 2.92E-06 | HLA-DQB1(dist=10111), HLA-DQA2(dist=64586) | intergenic |
| 6  | 32643184  | C | T | rs9275020              | 4.19E-03 | 0.214 | 0.263 | 0.77 | 0.63 | -0.93 | 3.67E-05 | 0.165 | 0.243 | 0.62 | 0.48 | -0.79 | 0.68 | 2.93E-06 | HLA-DQB1(dist=8718), HLA-DQA2(dist=65979)  | intergenic |
| 6  | 32644226  | T | C | rs28755219             | 3.75E-03 | 0.220 | 0.269 | 0.77 | 0.63 | -0.93 | 4.24E-05 | 0.173 | 0.252 | 0.62 | 0.49 | -0.8  | 0.68 | 2.93E-06 | HLA-DQB1(dist=9760), HLA-DQA2(dist=64937)  | intergenic |
| 6  | 32543192  | G | A | rs34798875             | 5.90E-05 | 0.088 | 0.134 | 0.62 | 0.47 | -0.82 | 4.32E-03 | 0.111 | 0.159 | 0.66 | 0.49 | -0.89 | 0.60 | 2.97E-06 | HLA-DRB6(dist=15413), HLA-DRB1(dist=33355) | intergenic |
| 6  | 32564898  | A | G | rs28366346             | 6.03E-05 | 0.191 | 0.259 | 0.68 | 0.55 | -0.83 | 4.85E-03 | 0.179 | 0.236 | 0.71 | 0.55 | -0.9  | 0.68 | 2.97E-06 | HLA-DRB1(dist=7285), HLA-DQA1(dist=40285)  | intergenic |
| 6  | 32541292  | C | G | rs9269397              | 4.84E-05 | 0.286 | 0.225 | 0.72 | 0.6  | -0.87 | 5.27E-03 | 0.224 | 0.175 | 0.73 | 0.59 | -0.92 | 0.65 | 2.98E-06 | HLA-DRB6(dist=13513), HLA-DRB1(dist=5255)  | intergenic |
| 6  | 32536370  | C | G | rs34714667             | 5.11E-05 | 0.246 | 0.191 | 0.72 | 0.59 | -0.87 | 4.88E-03 | 0.201 | 0.155 | 0.73 | 0.58 | -0.92 | 0.63 | 2.99E-06 | HLA-DRB6(dist=8591), HLA-DRB1(dist=10177)  | intergenic |
| 6  | 32456326  | T | A | rs75185583             | 2.21E-05 | 0.408 | 0.478 | 0.75 | 0.64 | -0.89 | 9.60E-03 | 0.514 | 0.459 | 0.80 | 0.67 | -0.97 | 0.69 | 2.99E-06 | HLA-DRA(dist=43500), HLA-DRB5(dist=28828)  | intergenic |
| 6  | 32644276  | T | A | rs28755223             | 3.18E-03 | 0.203 | 0.252 | 0.75 | 0.62 | -0.92 | 5.31E-05 | 0.150 | 0.226 | 0.61 | 0.47 | -0.79 | 0.68 | 3.00E-06 | HLA-DQB1(dist=9810), HLA-DQA2(dist=64887)  | intergenic |
| 6  | 32647476  | T | G | rs28371215             | 4.35E-03 | 0.210 | 0.259 | 0.76 | 0.63 | -0.93 | 3.16E-05 | 0.153 | 0.232 | 0.60 | 0.46 | -0.78 | 0.68 | 3.00E-06 | HLA-DQB1(dist=13010), HLA-DQA2(dist=61687) | intergenic |
| 6  | 32507759  | A | G | rs67322126             | 1.13E-06 | 0.267 | 0.201 | 0.69 | 0.57 | -0.83 | 4.73E-02 | 0.218 | 0.186 | 0.82 | 0.65 | -1.03 | 0.64 | 3.01E-06 | HLA-DRB5(dist=9753), HLA-DRB6(dist=12731)  | intergenic |
| 6  | 32630083  | C | T | rs9274055              | 3.43E-06 | 0.121 | 0.188 | 0.59 | 0.47 | -0.76 | 2.79E-02 | 0.157 | 0.199 | 0.75 | 0.58 | -0.96 | 0.65 | 3.01E-06 | HLA-DQB1                                   | intronic   |
| 6  | 32459686  | C | T | rs71545426             | 5.07E-05 | 0.286 | 0.228 | 0.74 | 0.61 | -0.89 | 4.91E-03 | 0.221 | 0.171 | 0.73 | 0.58 | -0.91 | 0.65 | 3.01E-06 | HLA-DRA(dist=46860), HLA-DRB5(dist=25468)  | intergenic |
| 6  | 32628103  | C | T | rs9273480              | 5.02E-06 | 0.136 | 0.210 | 0.59 | 0.47 | -0.75 | 2.63E-02 | 0.158 | 0.202 | 0.74 | 0.57 | -0.95 | 0.68 | 3.01E-06 | HLA-DQB1                                   | intronic   |
| 6  | 32565164  | A | G | rs28366358             | 5.95E-05 | 0.188 | 0.254 | 0.68 | 0.55 | -0.83 | 4.81E-03 | 0.184 | 0.242 | 0.71 | 0.56 | -0.9  | 0.68 | 3.01E-06 | HLA-DRB1(dist=7551), HLA-DQA1(dist=40019)  | intergenic |
| 6  | 32630996  | C | T | rs17613599             | 1.27E-05 | 0.118 | 0.181 | 0.61 | 0.48 | -0.78 | 1.49E-02 | 0.129 | 0.170 | 0.72 | 0.55 | -0.95 | 0.64 | 3.01E-06 | HLA-DQB1                                   | intronic   |
| 6  | 32647215  | G | A | rs28755367             | 2.74E-03 | 0.213 | 0.263 | 0.75 | 0.62 | -0.92 | 6.45E-05 | 0.166 | 0.242 | 0.62 | 0.48 | -0.8  | 0.68 | 3.02E-06 | HLA-DQB1(dist=12749), HLA-DQA2(dist=61948) | intergenic |
| 12 | 71670298  | A | G | rs111586196            | 1.03E-02 | 0.047 | 0.032 | 1.51 | 1.01 | -2.25 | 2.91E-05 | 0.061 | 0.029 | 2.20 | 1.47 | -3.3  | 2.64 | 3.03E-06 | TSPAN8(dist=118519), LGR5(dist=163252)     | intergenic |
| 6  | 32630856  | C | T | NA                     | 9.99E-06 | 0.109 | 0.171 | 0.59 | 0.46 | -0.77 | 1.81E-02 | 0.121 | 0.159 | 0.73 | 0.55 | -0.97 | 0.63 | 3.05E-06 | HLA-DQA1(dist=3992), HLA-DQB1(dist=11820)  | intergenic |
| 6  | 32488914  | A | G | rs73726170             | 6.35E-05 | 0.277 | 0.222 | 0.74 | 0.62 | -0.89 | 4.05E-03 | 0.206 | 0.157 | 0.72 | 0.57 | -0.91 | 0.64 | 3.07E-06 | HLA-DRB5                                   | intronic   |
| 6  | 32627784  | C | T | rs78372297             | 6.26E-06 | 0.135 | 0.209 | 0.59 | 0.47 | -0.75 | 2.41E-02 | 0.155 | 0.200 | 0.74 | 0.57 | -0.95 | 0.67 | 3.08E-06 | HLA-DQB1                                   | UTR3       |
| 6  | 32479571  | G | A | rs114836855            | 5.37E-05 | 0.065 | 0.101 | 0.62 | 0.45 | -0.85 | 3.52E-03 | 0.092 |       |      |      |       |      |          |                                            |            |

|    |           |   |   |                       |          |       |       |      |      |       |          |       |       |      |      |       |      |          |                                             |                |
|----|-----------|---|---|-----------------------|----------|-------|-------|------|------|-------|----------|-------|-------|------|------|-------|------|----------|---------------------------------------------|----------------|
| 6  | 32629289  | C | A | rs9273698             | 6.24E-06 | 0.120 | 0.188 | 0.59 | 0.46 | -0.75 | 2.36E-02 | 0.144 | 0.187 | 0.73 | 0.56 | -0.96 | 0.66 | 3.19E-06 | HLA-DQB1                                    | intronic       |
| 6  | 32569230  | G | A | rs9270790             | 5.81E-05 | 0.394 | 0.331 | 0.76 | 0.64 | -0.9  | 4.58E-03 | 0.305 | 0.252 | 0.76 | 0.62 | -0.94 | 0.67 | 3.19E-06 | HLA-DRB1(dist=11617), HLA-DQA1(dist=35953)  | intergenic     |
| 6  | 32629271  | C | T | rs9273687             | 6.60E-06 | 0.118 | 0.186 | 0.59 | 0.46 | -0.75 | 2.31E-02 | 0.143 | 0.185 | 0.73 | 0.56 | -0.96 | 0.66 | 3.20E-06 | HLA-DQB1                                    | intronic       |
| 6  | 32565176  | G | C | rs28366360            | 6.07E-05 | 0.186 | 0.253 | 0.68 | 0.55 | -0.83 | 5.04E-03 | 0.184 | 0.242 | 0.71 | 0.56 | -0.9  | 0.68 | 3.21E-06 | HLA-DRB1(dist=7563), HLA-DQA1(dist=40007)   | intergenic     |
| 6  | 32632274  | C | A | rs9274333             | 4.23E-06 | 0.073 | 0.125 | 0.55 | 0.4  | -0.74 | 2.36E-02 | 0.107 | 0.140 | 0.74 | 0.55 | -1    | 0.59 | 3.23E-06 | HLA-DQB1                                    | intronic       |
| 6  | 32646940  | G | T | rs28755346            | 3.06E-03 | 0.205 | 0.254 | 0.76 | 0.62 | -0.93 | 6.48E-05 | 0.165 | 0.241 | 0.62 | 0.49 | -0.8  | 0.68 | 3.25E-06 | HLA-DQB1(dist=12474), HLA-DQA2(dist=62223)  | intergenic     |
| 13 | 48060638  | G | C | rs74073868            | 1.39E-06 | 0.048 | 0.113 | 0.40 | 0.28 | -0.57 | 1.44E-01 | 0.079 | 0.091 | 0.86 | 0.61 | -1.21 | 0.59 | 3.28E-06 | HTR2A(dist=589427), LINC00562(dist=443650)  | intergenic     |
| 6  | 32652278  | T | C | rs3104361             | 5.12E-05 | 0.408 | 0.488 | 0.72 | 0.61 | -0.85 | 5.42E-03 | 0.404 | 0.474 | 0.75 | 0.62 | -0.91 | 0.73 | 3.29E-06 | HLA-DQB1(dist=17812), HLA-DQA2(dist=56885)  | intergenic     |
| 6  | 32546622  | C | A | rs6920823             | 4.35E-03 | 0.126 | 0.161 | 0.75 | 0.59 | -0.96 | 6.27E-05 | 0.135 | 0.206 | 0.60 | 0.46 | -0.79 | 0.63 | 3.31E-06 | HLA-DRB1                                    | UTR3           |
| 6  | 32631348  | G | A | rs281874903           | 4.94E-06 | 0.102 | 0.162 | 0.59 | 0.45 | -0.76 | 2.70E-02 | 0.122 | 0.158 | 0.74 | 0.56 | -0.99 | 0.62 | 3.31E-06 | HLA-DQB1                                    | intronic       |
| 6  | 32631343  | T | C | NA                    | 4.96E-06 | 0.102 | 0.162 | 0.59 | 0.45 | -0.76 | 2.70E-02 | 0.122 | 0.158 | 0.74 | 0.56 | -0.99 | 0.62 | 3.32E-06 | HLA-DQA1(dist=3992), HLA-DQB1(dist=11820)   | intergenic     |
| 6  | 32646970  | G | A | rs28755348            | 3.32E-03 | 0.205 | 0.253 | 0.76 | 0.62 | -0.93 | 5.90E-05 | 0.165 | 0.241 | 0.62 | 0.48 | -0.8  | 0.68 | 3.32E-06 | HLA-DQB1(dist=12504), HLA-DQA2(dist=62193)  | intergenic     |
| 6  | 32456353  | T | G | rs74813816            | 3.09E-05 | 0.385 | 0.451 | 0.76 | 0.64 | -0.9  | 8.08E-03 | 0.538 | 0.483 | 0.80 | 0.66 | -0.97 | 0.68 | 3.34E-06 | HLA-DRA(dist=43527), HLA-DRB5(dist=28801)   | intergenic     |
| 6  | 32480517  | G | C | rs78709333            | 3.47E-06 | 0.407 | 0.484 | 0.73 | 0.62 | -0.86 | 3.93E-02 | 0.502 | 0.459 | 0.84 | 0.7  | -1.01 | 0.69 | 3.43E-06 | HLA-DRA(dist=67691), HLA-DRB5(dist=4637)    | intergenic     |
| 6  | 32646193  | C | T | rs28755304            | 7.58E-03 | 0.188 | 0.231 | 0.77 | 0.63 | -0.95 | 1.77E-05 | 0.154 | 0.235 | 0.59 | 0.46 | -0.77 | 0.67 | 3.44E-06 | HLA-DQB1(dist=11727), HLA-DQA2(dist=62970)  | intergenic     |
| 6  | 32647027  | G | T | rs28755352            | 3.31E-03 | 0.204 | 0.253 | 0.76 | 0.62 | -0.93 | 6.24E-05 | 0.161 | 0.237 | 0.62 | 0.48 | -0.8  | 0.68 | 3.44E-06 | HLA-DQB1(dist=12561), HLA-DQA2(dist=62136)  | intergenic     |
| 13 | 57784474  | G | A | rs138573458           | 2.41E-01 | 0.025 | 0.033 | 0.75 | 0.45 | -1.25 | 2.20E-06 | 0.084 | 0.046 | 1.92 | 1.36 | -2.71 | 4.06 | 3.45E-06 | PRR20C(dist=40122), PCDH17(dist=421315)     | intergenic     |
| 6  | 32628812  | C | T | rs9273542             | 6.24E-06 | 0.124 | 0.193 | 0.59 | 0.47 | -0.75 | 2.36E-02 | 0.155 | 0.200 | 0.74 | 0.57 | -0.95 | 0.67 | 3.47E-06 | HLA-DQB1                                    | intronic       |
| 6  | 32644594  | G | A | rs28755243            | 4.39E-03 | 0.210 | 0.258 | 0.76 | 0.62 | -0.93 | 3.82E-05 | 0.152 | 0.229 | 0.60 | 0.46 | -0.78 | 0.68 | 3.53E-06 | HLA-DQB1(dist=10128), HLA-DQA2(dist=64569)  | intergenic     |
| 12 | 32460463  | T | C | rs116368151           | 7.84E-03 | 0.049 | 0.031 | 1.58 | 1.06 | -2.35 | 3.10E-05 | 0.059 | 0.028 | 2.18 | 1.44 | -3.28 | 2.47 | 3.53E-06 | BICD1                                       | intronic       |
| 6  | 32488845  | A | T | rs191239464           | 1.35E-06 | 0.356 | 0.285 | 0.72 | 0.61 | -0.86 | 5.73E-02 | 0.259 | 0.227 | 0.84 | 0.68 | -1.04 | 0.65 | 3.56E-06 | HLA-DRB5                                    | intronic       |
| 6  | 32459704  | T | C | rs71545427            | 5.87E-05 | 0.284 | 0.227 | 0.74 | 0.62 | -0.89 | 5.24E-03 | 0.217 | 0.169 | 0.73 | 0.58 | -0.92 | 0.65 | 3.59E-06 | HLA-DRA(dist=46878), HLA-DRB5(dist=25450)   | intergenic     |
| 6  | 32524009  | A | T | rs189057230           | 5.90E-06 | 0.217 | 0.281 | 0.71 | 0.58 | -0.86 | 3.06E-02 | 0.270 | 0.311 | 0.82 | 0.66 | -1.01 | 0.65 | 3.60E-06 | HLA-DRB6                                    | ncRNA_intronic |
| 6  | 32643844  | C | T | rs114557541           | 4.92E-03 | 0.210 | 0.257 | 0.77 | 0.63 | -0.94 | 4.04E-05 | 0.164 | 0.241 | 0.62 | 0.48 | -0.79 | 0.68 | 3.61E-06 | HLA-DQB1(dist=9378), HLA-DQA2(dist=65319)   | intergenic     |
| 6  | 32593627  | G | A | rs9271732             | 1.55E-05 | 0.494 | 0.412 | 0.72 | 0.61 | -0.85 | 1.51E-02 | 0.453 | 0.387 | 0.76 | 0.63 | -0.92 | 0.73 | 3.63E-06 | HLA-DRB1(dist=36014), HLA-DQA1(dist=11556)  | intergenic     |
| 6  | 32484502  | T | A | rs77948423            | 1.31E-06 | 0.195 | 0.266 | 0.67 | 0.55 | -0.82 | 7.17E-02 | 0.227 | 0.263 | 0.82 | 0.66 | -1.03 | 0.65 | 3.64E-06 | HLA-DRB5                                    | downstream     |
| 6  | 32630928  | C | A | NA                    | 1.12E-05 | 0.175 | 0.177 | 0.60 | 0.47 | -0.77 | 1.98E-02 | 0.123 | 0.161 | 0.73 | 0.55 | -0.97 | 0.64 | 3.64E-06 | HLA-DQA1(dist=3992), HLA-DQB1(dist=11820)   | intergenic     |
| 6  | 32524117  | C | A | rs116423341           | 1.08E-05 | 0.170 | 0.231 | 0.68 | 0.55 | -0.84 | 2.06E-02 | 0.191 | 0.231 | 0.79 | 0.62 | -1    | 0.64 | 3.64E-06 | HLA-DRB6                                    | ncRNA_intronic |
| 6  | 32647491  | T | C | rs28371216            | 5.22E-03 | 0.210 | 0.258 | 0.77 | 0.63 | -0.94 | 3.20E-05 | 0.153 | 0.232 | 0.60 | 0.46 | -0.78 | 0.68 | 3.66E-06 | HLA-DQB1(dist=13025), HLA-DQA2(dist=61672)  | intergenic     |
| 6  | 32631418  | A | G | rs17613643            | 8.76E-06 | 0.119 | 0.183 | 0.60 | 0.47 | -0.77 | 2.38E-02 | 0.125 | 0.162 | 0.74 | 0.56 | -0.98 | 0.64 | 3.67E-06 | HLA-DQB1                                    | intronic       |
| 9  | 117811778 | C | T | rs114032850           | 4.04E-05 | 0.078 | 0.042 | 1.91 | 1.38 | -2.64 | 1.78E-02 | 0.065 | 0.041 | 1.61 | 1.1  | -2.38 | 2.06 | 3.68E-06 | TNC                                         | intronic       |
| 6  | 32646978  | A | C | rs28755349            | 3.58E-03 | 0.206 | 0.254 | 0.76 | 0.63 | -0.93 | 6.11E-05 | 0.166 | 0.242 | 0.62 | 0.49 | -0.8  | 0.68 | 3.70E-06 | HLA-DQB1(dist=12512), HLA-DQA2(dist=62185)  | intergenic     |
| 6  | 32645660  | T | A | rs28755280            | 4.68E-03 | 0.206 | 0.252 | 0.77 | 0.63 | -0.94 | 4.05E-05 | 0.157 | 0.236 | 0.60 | 0.47 | -0.78 | 0.68 | 3.70E-06 | HLA-DQB1(dist=11194), HLA-DQA2(dist=63503)  | intergenic     |
| 6  | 32438783  | C | G | rs9269047             | 3.41E-05 | 0.197 | 0.137 | 0.65 | 0.52 | -0.8  | 8.63E-03 | 0.178 | 0.135 | 0.72 | 0.56 | -0.92 | 0.64 | 3.72E-06 | HLA-DRA(dist=25957), HLA-DRB5(dist=46371)   | intergenic     |
| 6  | 32644463  | T | C | rs28755239            | 4.36E-03 | 0.210 | 0.259 | 0.76 | 0.62 | -0.93 | 4.21E-05 | 0.153 | 0.230 | 0.60 | 0.47 | -0.78 | 0.68 | 3.74E-06 | HLA-DQB1(dist=9997), HLA-DQA2(dist=64700)   | intergenic     |
| 12 | 71672492  | T | C | rs78415841            | 1.02E-02 | 0.047 | 0.032 | 1.52 | 1.02 | -2.26 | 3.93E-05 | 0.060 | 0.028 | 2.20 | 1.46 | -3.3  | 2.60 | 3.76E-06 | TSPAN8(dist=120713), LGR5(dist=161058)      | intergenic     |
| 6  | 32460170  | C | T | rs113079522           | 6.28E-05 | 0.193 | 0.254 | 0.70 | 0.58 | -0.86 | 5.65E-03 | 0.239 | 0.296 | 0.74 | 0.6  | -0.93 | 0.67 | 3.80E-06 | HLA-DRA(dist=47344), HLA-DRB5(dist=24984)   | intergenic     |
| 6  | 32469700  | A | G | rs74811955            | 4.56E-05 | 0.363 | 0.435 | 0.74 | 0.63 | -0.88 | 7.28E-03 | 0.396 | 0.455 | 0.78 | 0.65 | -0.95 | 0.70 | 3.80E-06 | HLA-DRA(dist=56874), HLA-DRB5(dist=15454)   | intergenic     |
| 6  | 32630201  | T | C | rs9274114             | 2.30E-06 | 0.097 | 0.160 | 0.56 | 0.43 | -0.74 | 3.90E-02 | 0.136 | 0.174 | 0.75 | 0.57 | -0.98 | 0.64 | 3.82E-06 | HLA-DQB1                                    | intronic       |
| 6  | 32613573  | T | C | rs9273206             | 4.15E-05 | 0.271 | 0.210 | 0.71 | 0.59 | -0.86 | 6.50E-03 | 0.278 | 0.221 | 0.73 | 0.6  | -0.91 | 0.67 | 3.82E-06 | HLA-DQA1(dist=2144), HLA-DQB1(dist=13668)   | intergenic     |
| 6  | 32541061  | A | C | rs111608233           | 2.31E-05 | 0.092 | 0.140 | 0.63 | 0.48 | -0.82 | 1.10E-02 | 0.106 | 0.147 | 0.69 | 0.51 | -0.93 | 0.59 | 3.83E-06 | HLA-DRB6(dist=13282), HLA-DRB1(dist=5486)   | intergenic     |
| 3  | 101641101 | A | T | rs141365838           | 4.72E-02 | 0.111 | 0.082 | 1.39 | 1.06 | -1.81 | 2.55E-06 | 0.166 | 0.106 | 1.68 | 1.3  | -2.17 | 1.67 | 3.90E-06 | NFKBIZ(dist=61232), LOC152225(dist=18602)   | intergenic     |
| 6  | 32480270  | C | T | rs111565221           | 1.26E-05 | 0.427 | 0.496 | 0.76 | 0.64 | -0.89 | 1.77E-02 | 0.436 | 0.486 | 0.82 | 0.68 | -0.99 | 0.69 | 3.92E-06 | HLA-DRA(dist=67444), HLA-DRB5(dist=4884)    | intergenic     |
| 6  | 32469505  | G | A | rs80281605            | 4.58E-06 | 0.295 | 0.368 | 0.72 | 0.6  | -0.86 | 3.45E-02 | 0.331 | 0.381 | 0.80 | 0.66 | -0.98 | 0.70 | 3.97E-06 | HLA-DRA(dist=56679), HLA-DRB5(dist=15649)   | intergenic     |
| 6  | 32647510  | T | A | rs28371219            | 4.74E-03 | 0.209 | 0.257 | 0.76 | 0.63 | -0.93 | 4.36E-05 | 0.155 | 0.232 | 0.61 | 0.47 | -0.78 | 0.68 | 4.01E-06 | HLA-DQB1(dist=13044), HLA-DQA2(dist=61653)  | intergenic     |
| 6  | 32647508  | T | C | rs28371218            | 4.74E-03 | 0.209 | 0.257 | 0.76 | 0.63 | -0.93 | 4.37E-05 | 0.155 | 0.232 | 0.61 | 0.47 | -0.78 | 0.68 | 4.01E-06 | HLA-DQB1(dist=13042), HLA-DQA2(dist=61655)  | intergenic     |
| 6  | 32630922  | T | A | rs17843722            | 1.17E-05 | 0.115 | 0.177 | 0.61 | 0.47 | -0.78 | 2.10E-02 | 0.124 | 0.162 | 0.73 | 0.55 | -0.97 | 0.64 | 4.02E-06 | HLA-DQB1                                    | intronic       |
| 6  | 32492238  | C | T | rs78098131            | 6.34E-05 | 0.094 | 0.141 | 0.63 | 0.48 | -0.83 | 5.44E-03 | 0.105 | 0.150 | 0.66 | 0.49 | -0.9  | 0.60 | 4.03E-06 | HLA-DRB5                                    | intronic       |
| 6  | 32576962  | T | C | rs9271132;rs202070262 | 4.35E-03 | 0.394 | 0.345 | 0.81 | 0.68 | -0.95 | 5.37E-05 | 0.381 | 0.300 | 0.70 | 0.57 | -0.85 | 0.70 | 4.04E-06 | HLA-DRB1(dist=19349), HLA-DQA1(dist=28221)  | intergenic     |
| 6  | 32643755  | C | T | rs113898828           | 4.22E-03 | 0.222 | 0.271 | 0.77 | 0.63 | -0.93 | 5.39E-05 | 0.170 | 0.247 | 0.63 | 0.49 | -0.8  | 0.69 | 4.05E-06 | HLA-DQB1(dist=9289), HLA-DQA2(dist=65408)   | intergenic     |
| 13 | 107386148 | G | A | rs112119990           | 3.40E-06 | 0.042 | 0.025 | 1.69 | 1.1  | -2.61 | 4.35E-01 | 0.020 | 0.022 | 0.89 | 0.46 | -1.73 | 7.14 | 4.05E-06 | LINC00443(dist=61620), FAM155A(dist=434731) | intergenic     |
| 6  | 32643987  | A | G | rs28755205            | 4.28E-03 | 0.223 | 0.271 | 0.77 | 0.63 | -0.93 | 5.25E-05 | 0.173 | 0.251 | 0.63 | 0.49 | -0.8  | 0.69 | 4.06E-06 | HLA-DQB1(dist=9521), HLA-DQA2(dist=65176)   | intergenic     |
| 4  | 12398686  | A | G | rs112029027           | 5.38E-06 | 0.090 | 0.052 | 1.82 | 1.34 | -2.45 | 7.77E-02 | 0.067 | 0.048 | 1.43 | 0.98 | -2.08 | 1.97 | 4.06E-06 | SPATA5                                      | intronic       |
| 6  | 32558627  | G | T | rs9270425             | 7.99E-03 | 0.382 | 0.335 | 0.81 | 0.69 | -0.96 | 2.02E-05 | 0.368 | 0.283 | 0.68 | 0.56 | -0.82 | 0.69 | 4.09E-06 | HLA-DRB1(dist=1014), HLA-DQA1(dist=46556)   | intergenic     |
| 3  | 101642803 | G | T | rs116366643           | 4.72E-02 | 0.111 | 0.082 | 1.39 | 1.06 | -1.81 | 2.74E-06 | 0.166 | 0.106 | 1.68 | 1.3  | -2.17 | 1.67 | 4.10E-06 | NFKBIZ(dist=62934), LOC152225(dist=16900)   | intergenic     |
| 6  | 32631205  | G | A | rs9274234             | 9.34E-06 | 0.119 | 0.184 | 0.60 | 0.47 | -0.77 | 2.24E-02 | 0.141 | 0.184 | 0.73 | 0.56 | -0.95 | 0.66 | 4.14E-06 | HLA-DQB1                                    | intronic       |
| 6  | 32644     |   |   |                       |          |       |       |      |      |       |          |       |       |      |      |       |      |          |                                             |                |

|    |           |   |   |                                    |          |       |       |      |      |       |          |       |       |      |      |       |      |          |                                                |            |
|----|-----------|---|---|------------------------------------|----------|-------|-------|------|------|-------|----------|-------|-------|------|------|-------|------|----------|------------------------------------------------|------------|
| 6  | 32453191  | T | C | rs527369852                        | 4.88E-06 | 0.357 | 0.431 | 0.73 | 0.62 | -0.87 | 3.23E-02 | 0.362 | 0.415 | 0.80 | 0.66 | -0.97 | 0.70 | 4.25E-06 | HLA-DRA(dist=40365), HLA-DRB5(dist=31963)      | intergenic |
| 6  | 32573027  | T | A | rs9270950                          | 4.64E-03 | 0.313 | 0.261 | 0.78 | 0.65 | -0.93 | 4.80E-05 | 0.333 | 0.251 | 0.67 | 0.55 | -0.82 | 0.70 | 4.29E-06 | HLA-DRB1(dist=15414), HLA-DQA1(dist=32156)     | intergenic |
| 6  | 32645109  | C | A | rs28755263                         | 8.72E-03 | 0.205 | 0.249 | 0.78 | 0.64 | -0.95 | 1.94E-05 | 0.161 | 0.242 | 0.60 | 0.47 | -0.77 | 0.68 | 4.34E-06 | HLA-DQB1(dist=10643), HLA-DQA2(dist=64054)     | intergenic |
| 13 | 48069603  | C | T | rs59746857                         | 2.54E-06 | 0.060 | 0.124 | 0.45 | 0.32 | -0.62 | 1.28E-01 | 0.091 | 0.103 | 0.87 | 0.63 | -1.2  | 0.60 | 4.35E-06 | HTR2A(dist=598392), LINC00562(dist=434685)     | intergenic |
| 6  | 32641078  | T | C | rs9274884                          | 1.10E-02 | 0.138 | 0.176 | 0.75 | 0.6  | -0.95 | 1.96E-05 | 0.125 | 0.202 | 0.57 | 0.43 | -0.75 | 0.65 | 4.35E-06 | HLA-DQB1(dist=6612), HLA-DQA2(dist=68085)      | intergenic |
| 12 | 71683942  | G | A | rs80004137                         | 1.09E-02 | 0.047 | 0.032 | 1.51 | 1.01 | -2.25 | 4.32E-05 | 0.060 | 0.028 | 2.20 | 1.46 | -3.3  | 2.58 | 4.36E-06 | TSPAN8(dist=132163), LGR5(dist=149608)         | intergenic |
| 6  | 32470069  | A | T | rs80186386                         | 1.27E-05 | 0.261 | 0.329 | 0.72 | 0.6  | -0.86 | 2.19E-02 | 0.294 | 0.344 | 0.79 | 0.65 | -0.97 | 0.69 | 4.38E-06 | HLA-DRA(dist=57243), HLA-DRB5(dist=15085)      | intergenic |
| 4  | 125802654 | A | G | rs6831498                          | 6.30E-05 | 0.336 | 0.422 | 1.45 | 1.22 | -1.72 | 1.75E-02 | 0.368 | 0.414 | 1.21 | 1    | -1.47 | 1.36 | 4.39E-06 | ANKRD50(dist=168767), FAT4(dist=434913)        | intergenic |
| 4  | 96533133  | T | G | rs78365928                         | 1.88E-05 | 0.268 | 0.204 | 1.42 | 1.18 | -1.72 | 4.24E-02 | 0.242 | 0.199 | 1.29 | 1.03 | -1.6  | 1.44 | 4.41E-06 | UNC5C(dist=62772), PDHA2(dist=228106)          | intergenic |
| 1  | 6527333   | A | G | rs14708                            | 2.00E-02 | 0.499 | 0.444 | 0.80 | 0.68 | -0.94 | 2.16E-05 | 0.528 | 0.451 | 0.73 | 0.61 | -0.88 | 0.72 | 4.44E-06 | PLEKHG5                                        | UTR3       |
| 6  | 32480470  | T | C | rs76441164                         | 4.44E-06 | 0.233 | 0.303 | 0.70 | 0.58 | -0.85 | 3.84E-02 | 0.281 | 0.327 | 0.80 | 0.65 | -0.99 | 0.68 | 4.50E-06 | HLA-DRA(dist=67644), HLA-DRB5(dist=4684)       | intergenic |
| 19 | 6414451   | G | A | rs1051784                          | 4.20E-06 | 0.433 | 0.355 | 0.72 | 0.61 | -0.85 | 9.91E-01 | 0.420 | 0.429 | 1.04 | 0.86 | -1.26 | 0.58 | 4.54E-06 | KHSRP                                          | intronic   |
| 7  | 97502509  | G | A | rs74468320                         | 2.31E-02 | 0.054 | 0.038 | 1.43 | 0.99 | -2.08 | 7.67E-06 | 0.076 | 0.037 | 2.14 | 1.49 | -3.08 | 2.34 | 4.55E-06 | ASNS                                           | upstream   |
| 6  | 32460750  | C | T | rs796380179                        | 7.45E-06 | 0.293 | 0.362 | 0.73 | 0.61 | -0.88 | 2.88E-02 | 0.369 | 0.418 | 0.81 | 0.67 | -0.99 | 0.68 | 4.57E-06 | HLA-DRA(dist=47924), HLA-DRB5(dist=24404)      | intergenic |
| 11 | 17318307  | G | A | rs60838059                         | 1.93E-01 | 0.033 | 0.023 | 1.43 | 0.89 | -2.3  | 1.94E-08 | 0.077 | 0.043 | 1.87 | 1.3  | -2.67 | 2.79 | 4.58E-06 | NUCB2                                          | intronic   |
| 6  | 32644159  | T | C | rs28755217                         | 4.38E-03 | 0.215 | 0.263 | 0.77 | 0.63 | -0.93 | 6.15E-05 | 0.167 | 0.242 | 0.63 | 0.49 | -0.8  | 0.68 | 4.60E-06 | HLA-DQB1(dist=9693), HLA-DQA2(dist=65004)      | intergenic |
| 6  | 32641180  | T | C | rs9274894                          | 1.23E-02 | 0.149 | 0.187 | 0.76 | 0.61 | -0.95 | 1.68E-05 | 0.130 | 0.207 | 0.57 | 0.43 | -0.75 | 0.66 | 4.62E-06 | HLA-DQB1(dist=6714), HLA-DQA2(dist=67983)      | intergenic |
| 6  | 32641081  | C | T | rs9274885                          | 1.25E-02 | 0.138 | 0.175 | 0.76 | 0.6  | -0.95 | 1.74E-05 | 0.125 | 0.202 | 0.56 | 0.43 | -0.75 | 0.65 | 4.64E-06 | HLA-DQB1(dist=6615), HLA-DQA2(dist=68082)      | intergenic |
| 6  | 32488953  | G | C | rs112916088                        | 2.24E-05 | 0.313 | 0.250 | 0.73 | 0.61 | -0.88 | 1.39E-02 | 0.219 | 0.175 | 0.76 | 0.6  | -0.95 | 0.66 | 4.65E-06 | HLA-DRB5                                       | intronic   |
| 6  | 32455089  | G | T | rs151209291                        | 1.42E-05 | 0.308 | 0.244 | 0.73 | 0.61 | -0.87 | 1.94E-02 | 0.248 | 0.208 | 0.80 | 0.64 | -0.99 | 0.65 | 4.67E-06 | HLA-DRA(dist=42263), HLA-DRB5(dist=30065)      | intergenic |
| 6  | 32647388  | G | A | rs28755373                         | 6.86E-03 | 0.227 | 0.273 | 0.78 | 0.64 | -0.95 | 3.30E-05 | 0.192 | 0.272 | 0.63 | 0.5  | -0.8  | 0.69 | 4.72E-06 | HLA-DQB1(dist=12922), HLA-DQA2(dist=61775)     | intergenic |
| 6  | 32647495  | G | A | rs28371217                         | 5.52E-03 | 0.207 | 0.254 | 0.77 | 0.63 | -0.94 | 4.26E-05 | 0.150 | 0.227 | 0.60 | 0.46 | -0.78 | 0.68 | 4.75E-06 | HLA-DQB1(dist=13029), HLA-DQA2(dist=61668)     | intergenic |
| 6  | 32631086  | G | A | NA                                 | 1.02E-05 | 0.111 | 0.173 | 0.59 | 0.46 | -0.76 | 2.53E-02 | 0.127 | 0.165 | 0.74 | 0.56 | -0.98 | 0.65 | 4.75E-06 | HLA-DQA1(dist=3992), HLA-DQB1(dist=11820)      | intergenic |
| 6  | 32416366  | A | G | rs3135385                          | 3.54E-05 | 0.463 | 0.382 | 0.72 | 0.61 | -0.84 | 1.11E-02 | 0.441 | 0.374 | 0.76 | 0.63 | -0.92 | 0.74 | 4.75E-06 | HLA-DRA(dist=3540), HLA-DRB5(dist=68788)       | intergenic |
| 6  | 32492734  | A | G | rs115019366                        | 5.38E-05 | 0.324 | 0.261 | 0.74 | 0.62 | -0.88 | 7.61E-03 | 0.240 | 0.193 | 0.76 | 0.61 | -0.94 | 0.66 | 4.76E-06 | HLA-DRB5                                       | intronic   |
| 6  | 32634467  | C | T | rs3891175                          | 1.27E-05 | 0.130 | 0.197 | 0.61 | 0.48 | -0.77 | 2.08E-02 | 0.149 | 0.194 | 0.73 | 0.56 | -0.95 | 0.67 | 4.79E-06 | HLA-DQB1                                       | upstream   |
| 3  | 28984094  | C | A | rs111574474                        | 3.80E-03 | 0.066 | 0.047 | 1.42 | 1.01 | -1.99 | 3.57E-05 | 0.057 | 0.033 | 1.75 | 1.16 | -2.65 | 2.62 | 4.80E-06 | LINC00693(dist=184266), RBMS3-AS3(dist=321591) | intergenic |
| 13 | 48124767  | A | T | rs28500707                         | 3.38E-06 | 0.059 | 0.122 | 0.45 | 0.33 | -0.63 | 1.16E-01 | 0.080 | 0.093 | 0.85 | 0.6  | -1.2  | 0.59 | 4.81E-06 | HTR2A(dist=653556), LINC00562(dist=379521)     | intergenic |
| 6  | 32414420  | G | A | rs7382085                          | 3.53E-05 | 0.463 | 0.382 | 0.72 | 0.61 | -0.84 | 1.13E-02 | 0.441 | 0.374 | 0.76 | 0.63 | -0.92 | 0.74 | 4.85E-06 | HLA-DRA(dist=1594), HLA-DRB5(dist=70734)       | intergenic |
| 6  | 32488722  | A | C | rs150773158                        | 2.19E-05 | 0.330 | 0.269 | 0.75 | 0.63 | -0.89 | 1.34E-02 | 0.249 | 0.205 | 0.78 | 0.63 | -0.97 | 0.65 | 4.85E-06 | HLA-DRB5                                       | intronic   |
| 6  | 32644290  | C | T | rs28755225                         | 5.03E-03 | 0.201 | 0.246 | 0.77 | 0.63 | -0.94 | 5.44E-05 | 0.149 | 0.225 | 0.61 | 0.47 | -0.79 | 0.68 | 4.86E-06 | HLA-DQB1(dist=9824), HLA-DQA2(dist=64873)      | intergenic |
| 6  | 32433085  | A | T | rs9268927                          | 3.22E-05 | 0.192 | 0.132 | 0.64 | 0.52 | -0.8  | 1.14E-02 | 0.176 | 0.134 | 0.73 | 0.57 | -0.93 | 0.64 | 4.87E-06 | HLA-DRA(dist=20259), HLA-DRB5(dist=52069)      | intergenic |
| 9  | 117805074 | G | A | rs115542730                        | 6.08E-05 | 0.077 | 0.042 | 1.90 | 1.37 | -2.64 | 1.67E-02 | 0.065 | 0.041 | 1.62 | 1.1  | -2.39 | 2.04 | 4.88E-06 | TNC                                            | intronic   |
| 6  | 32647099  | T | C | rs28755360                         | 5.24E-03 | 0.212 | 0.258 | 0.77 | 0.64 | -0.94 | 5.17E-05 | 0.166 | 0.244 | 0.62 | 0.48 | -0.79 | 0.68 | 4.89E-06 | HLA-DQB1(dist=12633), HLA-DQA2(dist=62064)     | intergenic |
| 6  | 32643704  | T | C | rs28755193                         | 5.11E-03 | 0.228 | 0.277 | 0.77 | 0.64 | -0.93 | 5.02E-05 | 0.171 | 0.248 | 0.63 | 0.49 | -0.8  | 0.69 | 4.91E-06 | HLA-DQB1(dist=9238), HLA-DQA2(dist=65459)      | intergenic |
| 6  | 32492623  | C | T | rs112865401                        | 6.05E-05 | 0.305 | 0.243 | 0.73 | 0.61 | -0.88 | 7.20E-03 | 0.226 | 0.179 | 0.74 | 0.59 | -0.93 | 0.66 | 4.92E-06 | HLA-DRB5                                       | intronic   |
| 6  | 32644285  | G | T | rs28755224                         | 5.09E-03 | 0.201 | 0.246 | 0.77 | 0.63 | -0.94 | 5.44E-05 | 0.149 | 0.225 | 0.61 | 0.47 | -0.79 | 0.68 | 4.92E-06 | HLA-DQB1(dist=9819), HLA-DQA2(dist=64878)      | intergenic |
| 6  | 32606244  | C | T | rs9272502;rs67321228               | 6.54E-03 | 0.358 | 0.409 | 0.81 | 0.68 | -0.95 | 3.87E-05 | 0.368 | 0.463 | 0.68 | 0.56 | -0.82 | 0.72 | 4.95E-06 | HLA-DQA1                                       | intronic   |
| 6  | 32646252  | C | T | rs3129778                          | 8.65E-03 | 0.185 | 0.228 | 0.77 | 0.63 | -0.95 | 2.52E-05 | 0.153 | 0.232 | 0.60 | 0.46 | -0.77 | 0.68 | 4.97E-06 | HLA-DQB1(dist=11786), HLA-DQA2(dist=62911)     | intergenic |
| 6  | 32486970  | A | G | rs114324495                        | 1.02E-06 | 0.389 | 0.467 | 0.73 | 0.62 | -0.86 | 8.61E-02 | 0.429 | 0.468 | 0.85 | 0.7  | -1.03 | 0.68 | 4.97E-06 | HLA-DRB5                                       | intronic   |
| 7  | 97493376  | A | G | rs79201528                         | 1.84E-02 | 0.053 | 0.036 | 1.50 | 1.03 | -2.18 | 1.25E-05 | 0.073 | 0.035 | 2.19 | 1.51 | -3.18 | 2.29 | 5.00E-06 | ASNS                                           | intronic   |
| 6  | 32518426  | T | C | rs112054325                        | 1.19E-02 | 0.376 | 0.335 | 0.84 | 0.71 | -0.99 | 1.97E-05 | 0.390 | 0.304 | 0.68 | 0.56 | -0.83 | 0.68 | 5.01E-06 | HLA-DRB5(dist=20420), HLA-DRB6(dist=2064)      | intergenic |
| 6  | 32644086  | G | C | rs28755211                         | 6.00E-03 | 0.212 | 0.257 | 0.78 | 0.64 | -0.95 | 4.34E-05 | 0.162 | 0.237 | 0.62 | 0.49 | -0.8  | 0.68 | 5.03E-06 | HLA-DQB1(dist=9620), HLA-DQA2(dist=65077)      | intergenic |
| 6  | 32644423  | C | T | rs28755235                         | 5.93E-03 | 0.203 | 0.249 | 0.77 | 0.63 | -0.94 | 4.29E-05 | 0.146 | 0.223 | 0.60 | 0.46 | -0.78 | 0.68 | 5.05E-06 | HLA-DQB1(dist=9957), HLA-DQA2(dist=64740)      | intergenic |
| 13 | 57782304  | G | T | rs187163842                        | 1.46E-01 | 0.030 | 0.041 | 0.73 | 0.46 | -1.16 | 3.27E-06 | 0.089 | 0.050 | 1.86 | 1.33 | -2.61 | 3.78 | 5.05E-06 | PRR20C(dist=37952), PCDH17(dist=423485)        | intergenic |
| 6  | 32622359  | A | G | rs17613465                         | 3.52E-05 | 0.277 | 0.213 | 0.71 | 0.59 | -0.85 | 1.04E-02 | 0.252 | 0.201 | 0.75 | 0.6  | -0.93 | 0.67 | 5.05E-06 | HLA-DQA1(dist=10930), HLA-DQB1(dist=4882)      | intergenic |
| 6  | 32635197  | T | C | rs4988888                          | 7.21E-06 | 0.122 | 0.191 | 0.59 | 0.46 | -0.75 | 3.06E-02 | 0.145 | 0.187 | 0.74 | 0.57 | -0.96 | 0.67 | 5.12E-06 | HLA-DQB1                                       | upstream   |
| 6  | 32630242  | T | C | rs9274134                          | 3.97E-06 | 0.125 | 0.195 | 0.59 | 0.47 | -0.75 | 4.78E-02 | 0.143 | 0.180 | 0.76 | 0.58 | -0.99 | 0.66 | 5.14E-06 | HLA-DQB1                                       | intronic   |
| 6  | 32630660  | T | C | rs17613542                         | 8.70E-06 | 0.105 | 0.167 | 0.59 | 0.45 | -0.76 | 2.93E-02 | 0.123 | 0.158 | 0.75 | 0.56 | -0.99 | 0.64 | 5.16E-06 | HLA-DQB1                                       | intronic   |
| 6  | 32646309  | T | C | rs28755311                         | 5.74E-03 | 0.186 | 0.231 | 0.76 | 0.62 | -0.94 | 5.16E-05 | 0.162 | 0.239 | 0.62 | 0.48 | -0.79 | 0.68 | 5.16E-06 | HLA-DQB1(dist=11843), HLA-DQA2(dist=62854)     | intergenic |
| 6  | 32566288  | G | A | rs386699430;rs386699431;rs28383174 | 5.91E-05 | 0.191 | 0.259 | 0.68 | 0.55 | -0.83 | 8.31E-03 | 0.193 | 0.249 | 0.72 | 0.57 | -0.91 | 0.70 | 5.16E-06 | HLA-DRB1(dist=8675), HLA-DQA1(dist=38895)      | intergenic |
| 6  | 32566287  | G | C | rs28383173;rs386699430;rs386699431 | 5.91E-05 | 0.191 | 0.259 | 0.68 | 0.55 | -0.83 | 8.31E-03 | 0.193 | 0.249 | 0.72 | 0.57 | -0.91 | 0.70 | 5.17E-06 | HLA-DRB1(dist=8674), HLA-DQA1(dist=38896)      | intergenic |
| 6  | 32631210  | A | C | rs9274236;rs281875021              | 1.21E-05 | 0.118 | 0.182 | 0.60 | 0.47 | -0.77 | 2.27E-02 | 0.141 | 0.184 | 0.73 | 0.56 | -0.96 | 0.66 | 5.19E-06 | HLA-DQB1                                       | intronic   |
| 16 | 76411451  | A | C | rs16944320                         | 6.00E-05 | 0.051 | 0.027 | 1.94 | 1.31 | -2.89 | 2.26E-02 | 0.042 | 0.028 | 1.53 | 0.95 | -2.45 | 2.76 | 5.19E-06 | CNTNAP4                                        | intronic   |
| 6  | 32434978  | A | G | rs9268978                          | 3.17E-05 | 0.192 | 0.132 | 0.64 | 0.52 | -0.8  | 1.21E-02 | 0.178 | 0.137 | 0.73 | 0.57 | -0.94 | 0.64 | 5.20E-06 | HLA-DRA(dist=22152), HLA-DRB5(dist=50176)      | intergenic |
| 6  | 32646304  | C | T | rs28755310                         | 5.67E-03 | 0.186 | 0.231 | 0.76 | 0.62 | -0.94 | 5.34E-05 | 0.162 | 0.239 | 0.62 | 0.48 | -0.79 | 0.68 | 5.21E-06 | HLA-DQB1(dist=11838), HLA-DQA2(dist=6          |            |



|    |           |   |   |                         |          |       |       |      |      |       |          |       |       |      |      |       |       |          |                                             |            |
|----|-----------|---|---|-------------------------|----------|-------|-------|------|------|-------|----------|-------|-------|------|------|-------|-------|----------|---------------------------------------------|------------|
| 6  | 32455217  | G | A | rs111661846             | 1.06E-06 | 0.351 | 0.426 | 0.73 | 0.61 | -0.86 | 9.69E-02 | 0.355 | 0.396 | 0.84 | 0.69 | -1.02 | 0.68  | 5.43E-06 | HLA-DRA(dist=42391), HLA-DRB5(dist=29937)   | intergenic |
| 6  | 32486344  | T | C | NA                      | 3.98E-05 | 0.238 | 0.294 | 0.75 | 0.62 | -0.91 | 1.14E-02 | 0.275 | 0.323 | 0.79 | 0.64 | -0.98 | 0.66  | 5.47E-06 | HLA-DQA1(dist=3992), HLA-DQB1(dist=11820)   | intergenic |
| 16 | 81893201  | A | G | rs71376314;rs79351249   | 1.13E-01 | 0.017 | 0.023 | 0.77 | 0.42 | -1.41 | 5.28E-06 | 0.040 | 0.025 | 1.62 | 1    | -2.64 | 15.48 | 5.52E-06 | PLCG2                                       | intronic   |
| 6  | 32470248  | A | G | rs111699778             | 1.81E-05 | 0.264 | 0.329 | 0.73 | 0.61 | -0.88 | 1.86E-02 | 0.301 | 0.355 | 0.78 | 0.64 | -0.96 | 0.69  | 5.55E-06 | HLA-DRA(dist=57422), HLA-DRB5(dist=14906)   | intergenic |
| 6  | 32647045  | C | T | rs200801702;rs28755354  | 5.33E-03 | 0.211 | 0.257 | 0.77 | 0.64 | -0.94 | 5.98E-05 | 0.164 | 0.241 | 0.62 | 0.48 | -0.8  | 0.68  | 5.58E-06 | HLA-DQB1(dist=12579), HLA-DQA2(dist=62118)  | intergenic |
| 6  | 32632336  | G | A | rs9274341               | 9.13E-06 | 0.083 | 0.136 | 0.57 | 0.43 | -0.76 | 2.34E-02 | 0.121 | 0.157 | 0.74 | 0.56 | -0.98 | 0.62  | 5.59E-06 | HLA-DQB1                                    | intronic   |
| 6  | 32484779  | G | A | rs77762669              | 1.82E-05 | 0.341 | 0.407 | 0.75 | 0.64 | -0.89 | 1.76E-02 | 0.442 | 0.494 | 0.81 | 0.67 | -0.98 | 0.69  | 5.67E-06 | HLA-DRB5                                    | downstream |
| 6  | 32631057  | T | C | NA                      | 1.12E-05 | 0.112 | 0.175 | 0.60 | 0.47 | -0.77 | 2.86E-02 | 0.130 | 0.166 | 0.75 | 0.57 | -0.99 | 0.65  | 5.82E-06 | HLA-DQA1(dist=3992), HLA-DQB1(dist=11820)   | intergenic |
| 6  | 32486667  | G | A | rs115109434             | 2.17E-06 | 0.330 | 0.261 | 0.72 | 0.6  | -0.86 | 5.55E-02 | 0.234 | 0.200 | 0.82 | 0.65 | -1.02 | 0.66  | 5.87E-06 | HLA-DRB5                                    | intronic   |
| 14 | 63513131  | A | G | rs1956672               | 2.43E-05 | 0.308 | 0.387 | 1.42 | 1.19 | -1.69 | 2.89E-02 | 0.324 | 0.361 | 1.18 | 0.97 | -1.44 | 1.39  | 5.92E-06 | KCNH5(dist=1175), RHOJ(dist=157971)         | intergenic |
| 6  | 32631065  | C | T | rs17843723              | 1.13E-05 | 0.112 | 0.175 | 0.60 | 0.47 | -0.77 | 2.88E-02 | 0.130 | 0.166 | 0.75 | 0.57 | -0.99 | 0.65  | 5.93E-06 | HLA-DQB1                                    | intronic   |
| 6  | 32646232  | C | G | rs28755305              | 1.12E-02 | 0.184 | 0.225 | 0.78 | 0.63 | -0.96 | 2.17E-05 | 0.152 | 0.232 | 0.59 | 0.46 | -0.77 | 0.68  | 5.94E-06 | HLA-DQB1(dist=11766), HLA-DQA2(dist=62931)  | intergenic |
| 6  | 32593220  | T | G | rs9271702               | 2.56E-06 | 0.404 | 0.318 | 0.69 | 0.58 | -0.81 | 6.36E-02 | 0.360 | 0.310 | 0.80 | 0.66 | -0.97 | 0.72  | 5.95E-06 | HLA-DRB1(dist=35607), HLA-DQA1(dist=11963)  | intergenic |
| 6  | 32632903  | G | A | rs9274413               | 1.64E-05 | 0.143 | 0.209 | 0.63 | 0.5  | -0.8  | 2.27E-02 | 0.142 | 0.185 | 0.73 | 0.56 | -0.95 | 0.67  | 6.02E-06 | HLA-DQB1                                    | intronic   |
| 6  | 32506894  | C | T | rs7737801               | 3.15E-05 | 0.259 | 0.323 | 0.73 | 0.61 | -0.88 | 1.47E-02 | 0.265 | 0.321 | 0.76 | 0.62 | -0.94 | 0.69  | 6.05E-06 | HLA-DRB5(dist=8888), HLA-DRB6(dist=13596)   | intergenic |
| 6  | 32457305  | C | T | rs76565175              | 1.67E-05 | 0.375 | 0.442 | 0.76 | 0.64 | -0.89 | 2.22E-02 | 0.427 | 0.480 | 0.81 | 0.67 | -0.98 | 0.69  | 6.07E-06 | HLA-DRA(dist=44479), HLA-DRB5(dist=27849)   | intergenic |
| 6  | 32453372  | A | G | rs62405567              | 1.03E-05 | 0.409 | 0.482 | 0.74 | 0.63 | -0.88 | 2.73E-02 | 0.441 | 0.494 | 0.81 | 0.67 | -0.97 | 0.71  | 6.10E-06 | HLA-DRA(dist=40546), HLA-DRB5(dist=31782)   | intergenic |
| 6  | 32630232  | G | A | rs9274130               | 4.33E-06 | 0.125 | 0.194 | 0.59 | 0.47 | -0.75 | 5.32E-02 | 0.141 | 0.178 | 0.76 | 0.58 | -0.99 | 0.66  | 6.15E-06 | HLA-DQB1                                    | intronic   |
| 6  | 32631130  | G | A | NA                      | 6.50E-06 | 0.104 | 0.167 | 0.58 | 0.45 | -0.75 | 3.68E-02 | 0.134 | 0.172 | 0.75 | 0.57 | -0.98 | 0.65  | 6.17E-06 | HLA-DQA1(dist=3992), HLA-DQB1(dist=11820)   | intergenic |
| 6  | 32631129  | T | C | rs17613629              | 6.50E-06 | 0.104 | 0.167 | 0.58 | 0.45 | -0.75 | 3.68E-02 | 0.134 | 0.172 | 0.75 | 0.57 | -0.98 | 0.65  | 6.17E-06 | HLA-DQB1                                    | intronic   |
| 6  | 32644428  | A | G | rs28755236              | 7.20E-03 | 0.202 | 0.247 | 0.77 | 0.63 | -0.94 | 4.23E-05 | 0.146 | 0.223 | 0.60 | 0.46 | -0.78 | 0.68  | 6.18E-06 | HLA-DQB1(dist=9962), HLA-DQA2(dist=64735)   | intergenic |
| 4  | 41056317  | A | G | rs6814424               | 7.12E-06 | 0.047 | 0.026 | 1.90 | 1.26 | -2.87 | 1.48E-01 | 0.032 | 0.024 | 1.33 | 0.77 | -2.28 | 3.59  | 6.24E-06 | APBB2                                       | intronic   |
| 4  | 176812473 | G | A | rs57871202              | 6.43E-06 | 0.044 | 0.023 | 1.95 | 1.27 | -2.98 | 6.82E-01 | 0.034 | 0.033 | 1.03 | 0.61 | -1.72 | 5.73  | 6.33E-06 | GPM6A                                       | intronic   |
| 6  | 32481493  | C | G | rs144660631             | 4.19E-06 | 0.412 | 0.343 | 0.74 | 0.63 | -0.88 | 4.72E-02 | 0.333 | 0.295 | 0.84 | 0.69 | -1.02 | 0.67  | 6.40E-06 | HLA-DRA(dist=68667), HLA-DRB5(dist=3661)    | intergenic |
| 6  | 32469496  | A | C | rs74673002              | 9.58E-06 | 0.285 | 0.356 | 0.72 | 0.61 | -0.86 | 3.29E-02 | 0.316 | 0.366 | 0.80 | 0.65 | -0.98 | 0.70  | 6.44E-06 | HLA-DRA(dist=56670), HLA-DRB5(dist=15658)   | intergenic |
| 13 | 48050278  | C | T | rs9595719               | 2.35E-06 | 0.050 | 0.113 | 0.41 | 0.29 | -0.59 | 1.78E-01 | 0.080 | 0.090 | 0.88 | 0.62 | -1.23 | 0.59  | 6.60E-06 | HTR2A(dist=579067), LINC00562(dist=454010)  | intergenic |
| 6  | 32484792  | T | C | rs76949882              | 4.63E-05 | 0.371 | 0.435 | 0.77 | 0.65 | -0.91 | 1.17E-02 | 0.449 | 0.502 | 0.81 | 0.67 | -0.98 | 0.69  | 6.63E-06 | HLA-DRB5                                    | downstream |
| 6  | 32630768  | G | T | rs17613563              | 1.03E-05 | 0.101 | 0.161 | 0.58 | 0.45 | -0.76 | 3.25E-02 | 0.125 | 0.159 | 0.75 | 0.57 | -1    | 0.64  | 6.63E-06 | HLA-DQB1                                    | intronic   |
| 6  | 32646241  | T | A | rs28755307              | 1.17E-02 | 0.184 | 0.224 | 0.78 | 0.63 | -0.96 | 2.35E-05 | 0.151 | 0.231 | 0.59 | 0.46 | -0.77 | 0.68  | 6.65E-06 | HLA-DQB1(dist=11775), HLA-DQA2(dist=62922)  | intergenic |
| 3  | 101652887 | G | C | rs7631832               | 5.32E-02 | 0.110 | 0.083 | 1.38 | 1.06 | -1.8  | 4.26E-06 | 0.164 | 0.106 | 1.66 | 1.28 | -2.14 | 1.66  | 6.70E-06 | NFKB1Z(dist=73018), LOC152225(dist=6816)    | intergenic |
| 6  | 32611860  | A | G | rs9273032               | 2.89E-05 | 0.253 | 0.191 | 0.70 | 0.58 | -0.85 | 1.44E-02 | 0.238 | 0.189 | 0.75 | 0.6  | -0.93 | 0.67  | 6.78E-06 | HLA-DQA1                                    | downstream |
| 6  | 32458991  | A | G | rs111458169             | 2.07E-05 | 0.209 | 0.268 | 0.72 | 0.59 | -0.88 | 2.31E-02 | 0.231 | 0.278 | 0.78 | 0.63 | -0.98 | 0.66  | 6.95E-06 | HLA-DRA(dist=46165), HLA-DRB5(dist=26163)   | intergenic |
| 6  | 32460766  | G | T | rs76753608              | 1.09E-05 | 0.340 | 0.410 | 0.74 | 0.63 | -0.88 | 3.33E-02 | 0.389 | 0.437 | 0.82 | 0.68 | -0.99 | 0.69  | 6.95E-06 | HLA-DRA(dist=47940), HLA-DRB5(dist=24388)   | intergenic |
| 6  | 32565721  | T | C | rs9270643;rs386699424   | 6.27E-05 | 0.262 | 0.202 | 0.71 | 0.59 | -0.86 | 9.95E-03 | 0.225 | 0.180 | 0.76 | 0.6  | -0.95 | 0.67  | 6.98E-06 | HLA-DRB1(dist=8108), HLA-DQA1(dist=39462)   | intergenic |
| 6  | 32646238  | C | T | rs28755306              | 1.21E-02 | 0.184 | 0.224 | 0.78 | 0.63 | -0.96 | 2.39E-05 | 0.151 | 0.231 | 0.59 | 0.46 | -0.77 | 0.68  | 7.00E-06 | HLA-DQB1(dist=11772), HLA-DQA2(dist=62925)  | intergenic |
| 3  | 101646863 | A | T | rs57809984              | 4.95E-02 | 0.110 | 0.082 | 1.39 | 1.06 | -1.81 | 5.55E-06 | 0.164 | 0.106 | 1.65 | 1.28 | -2.13 | 1.66  | 7.04E-06 | NFKB1Z(dist=66994), LOC152225(dist=12840)   | intergenic |
| 6  | 32539424  | A | C | rs9269290               | 1.41E-02 | 0.490 | 0.452 | 0.86 | 0.73 | -1.01 | 1.80E-05 | 0.471 | 0.387 | 0.71 | 0.59 | -0.85 | 0.69  | 7.08E-06 | HLA-DRB6(dist=11645), HLA-DRB1(dist=7123)   | intergenic |
| 6  | 32631122  | A | G | rs17613622              | 7.50E-06 | 0.105 | 0.167 | 0.58 | 0.45 | -0.76 | 3.78E-02 | 0.135 | 0.173 | 0.75 | 0.57 | -0.98 | 0.65  | 7.09E-06 | HLA-DQB1                                    | intronic   |
| 6  | 32631639  | C | T | rs9274271               | 4.22E-05 | 0.101 | 0.156 | 0.61 | 0.47 | -0.79 | 1.24E-02 | 0.122 | 0.163 | 0.71 | 0.54 | -0.95 | 0.64  | 7.13E-06 | HLA-DQB1                                    | intronic   |
| 6  | 32340176  | C | T | rs3117110               | 3.18E-05 | 0.462 | 0.388 | 1.35 | 1.15 | -1.59 | 1.70E-02 | 0.443 | 0.381 | 1.29 | 1.07 | -1.56 | 1.37  | 7.14E-06 | C6orf10                                     | upstream   |
| 11 | 35723613  | G | T | rs3118133               | 5.20E-05 | 0.102 | 0.065 | 1.62 | 1.23 | -2.15 | 3.11E-02 | 0.096 | 0.068 | 1.45 | 1.05 | -2    | 1.77  | 7.21E-06 | TRIM44                                      | intronic   |
| 11 | 35774045  | C | T | rs3112062               | 5.21E-05 | 0.103 | 0.066 | 1.62 | 1.22 | -2.15 | 3.10E-02 | 0.096 | 0.068 | 1.46 | 1.06 | -2.01 | 1.77  | 7.24E-06 | TRIM44                                      | intronic   |
| 11 | 35731802  | G | T | rs3110369               | 1.12E-05 | 0.130 | 0.090 | 1.51 | 1.18 | -1.95 | 7.49E-02 | 0.117 | 0.092 | 1.31 | 0.98 | -1.75 | 1.74  | 7.33E-06 | TRIM44                                      | intronic   |
| 6  | 32457285  | A | G | rs79042439              | 1.40E-05 | 0.369 | 0.436 | 0.76 | 0.64 | -0.89 | 2.94E-02 | 0.425 | 0.476 | 0.81 | 0.67 | -0.98 | 0.70  | 7.41E-06 | HLA-DRA(dist=44459), HLA-DRB5(dist=27869)   | intergenic |
| 11 | 35769491  | C | T | rs3105266               | 5.62E-05 | 0.102 | 0.065 | 1.62 | 1.22 | -2.15 | 3.01E-02 | 0.096 | 0.067 | 1.46 | 1.06 | -2.02 | 1.77  | 7.41E-06 | TRIM44                                      | intronic   |
| 6  | 32630755  | C | T | NA                      | 1.18E-05 | 0.096 | 0.155 | 0.58 | 0.44 | -0.76 | 3.08E-02 | 0.124 | 0.159 | 0.75 | 0.57 | -1    | 0.64  | 7.42E-06 | HLA-DQA1(dist=3992), HLA-DQB1(dist=11820)   | intergenic |
| 6  | 32593080  | A | G | rs9271695;rs386699519   | 3.42E-06 | 0.403 | 0.318 | 0.69 | 0.58 | -0.82 | 6.50E-02 | 0.360 | 0.310 | 0.80 | 0.66 | -0.97 | 0.73  | 7.44E-06 | HLA-DRB1(dist=35467), HLA-DQA1(dist=12103)  | intergenic |
| 6  | 32588422  | C | T | rs9271454               | 5.09E-05 | 0.163 | 0.226 | 0.66 | 0.54 | -0.83 | 1.24E-02 | 0.175 | 0.228 | 0.72 | 0.56 | -0.92 | 0.69  | 7.46E-06 | HLA-DRB1(dist=30809), HLA-DQA1(dist=16761)  | intergenic |
| 6  | 32588423  | T | G | rs9271455               | 5.09E-05 | 0.163 | 0.226 | 0.67 | 0.54 | -0.83 | 1.24E-02 | 0.175 | 0.228 | 0.72 | 0.56 | -0.92 | 0.69  | 7.47E-06 | HLA-DRB1(dist=30810), HLA-DQA1(dist=16760)  | intergenic |
| 6  | 32643687  | G | T | rs28755192              | 7.66E-03 | 0.231 | 0.278 | 0.78 | 0.64 | -0.95 | 4.77E-05 | 0.171 | 0.248 | 0.63 | 0.49 | -0.8  | 0.70  | 7.54E-06 | HLA-DQB1(dist=9221), HLA-DQA2(dist=65476)   | intergenic |
| 7  | 38044200  | A | G | rs10951545              | 1.26E-02 | 0.503 | 0.450 | 1.24 | 1.05 | -1.45 | 4.80E-05 | 0.548 | 0.449 | 1.49 | 1.23 | -1.79 | 1.33  | 7.58E-06 | EPDR1(dist=52658), STARD3NL(dist=173608)    | intergenic |
| 14 | 107207818 | G | A | rs12880947              | 1.49E-01 | 0.035 | 0.024 | 1.51 | 0.95 | -2.4  | 1.10E-08 | 0.060 | 0.037 | 1.68 | 1.12 | -2.51 | 3.43  | 7.62E-06 | MIR7641-2(dist=115053), MIR5195(dist=51282) | intergenic |
| 3  | 101618511 | G | A | rs75298342              | 7.74E-02 | 0.110 | 0.084 | 1.36 | 1.04 | -1.77 | 2.25E-06 | 0.161 | 0.101 | 1.72 | 1.33 | -2.23 | 1.64  | 7.62E-06 | NFKB1Z(dist=38642), LOC152225(dist=41192)   | intergenic |
| 6  | 32480408  | G | T | rs111604635;rs200869895 | 7.09E-06 | 0.248 | 0.319 | 0.71 | 0.59 | -0.85 | 4.49E-02 | 0.286 | 0.332 | 0.81 | 0.66 | -0.99 | 0.70  | 7.64E-06 | HLA-DRA(dist=67582), HLA-DRB5(dist=4746)    | intergenic |
| 6  | 32414639  | G | A | rs7382354               | 5.22E-05 | 0.469 | 0.390 | 0.72 | 0.61 | -0.85 | 1.31E-02 | 0.445 | 0.380 | 0.76 | 0.63 | -0.92 | 0.74  | 7.72E-06 | HLA-DRA(dist=1813), HLA-DRB5(dist=70515)    | intergenic |
| 6  | 32429582  | A | G | rs9268851               | 6.09E-05 | 0.189 | 0.131 | 0.65 | 0.52 | -0.8  | 1.12E-02 | 0.175 | 0.134 | 0.73 | 0.57 | -0.93 | 0.65  | 7.73E-06 | HLA-DRA(dist=16756), HLA-DRB5(dist=55572)   | intergenic |
| 11 | 35717942  | G | A | rs3118135               |          |       |       |      |      |       |          |       |       |      |      |       |       |          |                                             |            |

|    |           |   |   |                         |          |       |       |      |      |       |          |       |       |      |      |       |      |          |                                            |                |
|----|-----------|---|---|-------------------------|----------|-------|-------|------|------|-------|----------|-------|-------|------|------|-------|------|----------|--------------------------------------------|----------------|
| 7  | 38037534  | A | T | rs4562215               | 1.33E-02 | 0.508 | 0.455 | 1.24 | 1.05 | -1.46 | 4.74E-05 | 0.551 | 0.453 | 1.48 | 1.23 | -1.79 | 1.33 | 8.24E-06 | EPDR1(dist=45992), STARD3NL(dist=180274)   | intergenic     |
| 6  | 32634243  | G | A | rs9274514               | 2.34E-05 | 0.133 | 0.199 | 0.62 | 0.49 | -0.78 | 2.24E-02 | 0.150 | 0.194 | 0.73 | 0.56 | -0.95 | 0.68 | 8.25E-06 | HLA-DQB1                                   | intronic       |
| 6  | 32488564  | G | A | rs191737659             | 4.80E-05 | 0.334 | 0.274 | 0.75 | 0.63 | -0.9  | 1.34E-02 | 0.257 | 0.213 | 0.78 | 0.63 | -0.97 | 0.67 | 8.30E-06 | HLA-DRB5                                   | intronic       |
| 6  | 32632850  | G | A | rs9274408               | 2.51E-05 | 0.133 | 0.197 | 0.62 | 0.49 | -0.79 | 2.31E-02 | 0.142 | 0.185 | 0.73 | 0.56 | -0.95 | 0.67 | 8.33E-06 | HLA-DQB1                                   | intronic       |
| 6  | 32469671  | A | C | rs115115354             | 5.44E-05 | 0.285 | 0.347 | 0.75 | 0.63 | -0.9  | 1.33E-02 | 0.319 | 0.375 | 0.78 | 0.64 | -0.95 | 0.70 | 8.37E-06 | HLA-DRA(dist=56845), HLA-DRB5(dist=15483)  | intergenic     |
| 6  | 32593421  | G | A | rs9271710               | 2.48E-06 | 0.449 | 0.361 | 0.69 | 0.59 | -0.82 | 7.95E-02 | 0.388 | 0.342 | 0.82 | 0.67 | -0.99 | 0.73 | 8.41E-06 | HLA-DRB1(dist=35808), HLA-DQA1(dist=11762) | intergenic     |
| 6  | 32483045  | T | C | rs530159949;rs145893158 | 1.05E-05 | 0.297 | 0.366 | 0.73 | 0.61 | -0.87 | 3.89E-02 | 0.361 | 0.407 | 0.82 | 0.68 | -1    | 0.70 | 8.42E-06 | HLA-DRA(dist=70219), HLA-DRB5(dist=2109)   | intergenic     |
| 6  | 32483060  | A | G | rs112388251             | 1.34E-05 | 0.298 | 0.367 | 0.73 | 0.61 | -0.87 | 3.40E-02 | 0.366 | 0.413 | 0.82 | 0.68 | -1    | 0.70 | 8.52E-06 | HLA-DRA(dist=70234), HLA-DRB5(dist=2094)   | intergenic     |
| 6  | 32474478  | T | C | rs185370462             | 9.99E-06 | 0.254 | 0.320 | 0.72 | 0.6  | -0.87 | 3.13E-02 | 0.320 | 0.369 | 0.80 | 0.66 | -0.98 | 0.69 | 8.54E-06 | HLA-DRA(dist=61652), HLA-DRB5(dist=10676)  | intergenic     |
| 6  | 32614872  | G | C | rs17612503              | 4.53E-05 | 0.265 | 0.205 | 0.71 | 0.59 | -0.86 | 1.39E-02 | 0.238 | 0.189 | 0.75 | 0.6  | -0.93 | 0.68 | 8.66E-06 | HLA-DQA1(dist=3443), HLA-DQB1(dist=12369)  | intergenic     |
| 6  | 32634584  | C | G | rs3891174               | 1.79E-05 | 0.128 | 0.194 | 0.61 | 0.48 | -0.78 | 2.72E-02 | 0.150 | 0.193 | 0.74 | 0.57 | -0.96 | 0.68 | 8.70E-06 | HLA-DQB1                                   | upstream       |
| 6  | 32646274  | T | C | rs28755308              | 8.25E-03 | 0.188 | 0.230 | 0.77 | 0.63 | -0.95 | 6.05E-05 | 0.161 | 0.237 | 0.62 | 0.48 | -0.79 | 0.68 | 8.73E-06 | HLA-DQB1(dist=11808), HLA-DQA2(dist=62889) | intergenic     |
| 6  | 32539625  | T | C | rs9269309               | 2.82E-02 | 0.474 | 0.437 | 0.86 | 0.73 | -1.02 | 6.48E-06 | 0.466 | 0.379 | 0.70 | 0.58 | -0.84 | 0.70 | 8.75E-06 | HLA-DRB6(dist=11846), HLA-DRB1(dist=6922)  | intergenic     |
| 6  | 32589301  | A | G | rs9271501               | 4.97E-05 | 0.343 | 0.422 | 0.71 | 0.6  | -0.85 | 1.44E-02 | 0.356 | 0.417 | 0.77 | 0.64 | -0.94 | 0.74 | 8.75E-06 | HLA-DRB1(dist=31688), HLA-DQA1(dist=15882) | intergenic     |
| 6  | 32459176  | A | G | rs191818300             | 1.63E-05 | 0.325 | 0.391 | 0.75 | 0.63 | -0.89 | 2.65E-02 | 0.393 | 0.442 | 0.82 | 0.68 | -0.99 | 0.69 | 8.77E-06 | HLA-DRA(dist=46350), HLA-DRB5(dist=25978)  | intergenic     |
| 3  | 101612626 | G | A | rs12491317              | 8.22E-02 | 0.110 | 0.084 | 1.35 | 1.03 | -1.76 | 2.41E-06 | 0.161 | 0.101 | 1.72 | 1.33 | -2.23 | 1.64 | 8.78E-06 | NFKBIZ(dist=32757), LOC152225(dist=47077)  | intergenic     |
| 6  | 32632885  | G | T | rs9274412               | 3.16E-05 | 0.129 | 0.191 | 0.63 | 0.49 | -0.79 | 2.01E-02 | 0.141 | 0.185 | 0.73 | 0.56 | -0.95 | 0.67 | 8.89E-06 | HLA-DQB1                                   | intronic       |
| 6  | 32589300  | C | T | rs9271500               | 4.80E-05 | 0.343 | 0.422 | 0.71 | 0.6  | -0.85 | 1.50E-02 | 0.356 | 0.416 | 0.77 | 0.64 | -0.94 | 0.74 | 8.91E-06 | HLA-DRB1(dist=31687), HLA-DQA1(dist=15883) | intergenic     |
| 6  | 32542370  | T | A | rs9269474               | 9.45E-03 | 0.353 | 0.311 | 0.83 | 0.7  | -0.98 | 5.74E-05 | 0.343 | 0.268 | 0.70 | 0.57 | -0.85 | 0.69 | 8.98E-06 | HLA-DRB6(dist=14591), HLA-DRB1(dist=4177)  | intergenic     |
| 6  | 32615816  | G | A | rs17612669              | 1.97E-02 | 0.510 | 0.466 | 0.84 | 0.71 | -0.99 | 1.42E-05 | 0.513 | 0.412 | 0.67 | 0.55 | -0.8  | 0.74 | 9.01E-06 | HLA-DQA1(dist=4387), HLA-DQB1(dist=11425)  | intergenic     |
| 6  | 32592833  | C | G | rs9271673               | 4.44E-06 | 0.399 | 0.315 | 0.69 | 0.58 | -0.82 | 6.64E-02 | 0.359 | 0.309 | 0.80 | 0.66 | -0.97 | 0.73 | 9.01E-06 | HLA-DRB1(dist=35220), HLA-DQA1(dist=12350) | intergenic     |
| 6  | 32573247  | T | C | rs9270958               | 9.16E-03 | 0.366 | 0.320 | 0.82 | 0.69 | -0.97 | 5.15E-05 | 0.364 | 0.286 | 0.70 | 0.57 | -0.85 | 0.70 | 9.01E-06 | HLA-DRB1(dist=15634), HLA-DQA1(dist=31936) | intergenic     |
| 6  | 32474090  | G | T | rs76659340              | 1.69E-06 | 0.262 | 0.335 | 0.70 | 0.59 | -0.84 | 8.18E-02 | 0.319 | 0.361 | 0.83 | 0.68 | -1.01 | 0.69 | 9.02E-06 | HLA-DRA(dist=61264), HLA-DRB5(dist=11064)  | intergenic     |
| 8  | 73834133  | G | T | rs142677578             | 1.24E-02 | 0.045 | 0.031 | 1.45 | 0.97 | -2.18 | 1.83E-05 | 0.048 | 0.023 | 2.12 | 1.35 | -3.34 | 2.84 | 9.22E-06 | KCNB2                                      | intronic       |
| 7  | 64554743  | T | C | rs4498429               | 1.65E-05 | 0.223 | 0.175 | 0.73 | 0.6  | -0.9  | 7.02E-02 | 0.219 | 0.184 | 0.80 | 0.64 | -1.01 | 0.63 | 9.23E-06 | CCT6P3(dist=19652), ZNF92(dist=283969)     | intergenic     |
| 6  | 32457291  | G | C | rs74745419              | 1.84E-05 | 0.362 | 0.428 | 0.76 | 0.64 | -0.9  | 2.94E-02 | 0.419 | 0.469 | 0.81 | 0.67 | -0.98 | 0.70 | 9.29E-06 | HLA-DRA(dist=44465), HLA-DRB5(dist=27863)  | intergenic     |
| 6  | 32470053  | A | G | rs75958729              | 1.57E-05 | 0.257 | 0.324 | 0.72 | 0.6  | -0.87 | 3.46E-02 | 0.300 | 0.347 | 0.80 | 0.66 | -0.99 | 0.70 | 9.51E-06 | HLA-DRA(dist=57227), HLA-DRB5(dist=15101)  | intergenic     |
| 6  | 32632252  | A | G | rs9274330               | 1.53E-05 | 0.069 | 0.116 | 0.56 | 0.41 | -0.77 | 2.66E-02 | 0.107 | 0.138 | 0.75 | 0.56 | -1.01 | 0.60 | 9.54E-06 | HLA-DQB1                                   | intronic       |
| 7  | 38040027  | T | G | rs2392524               | 1.87E-02 | 0.519 | 0.466 | 1.24 | 1.05 | -1.45 | 2.81E-05 | 0.581 | 0.484 | 1.48 | 1.23 | -1.79 | 1.33 | 9.55E-06 | EPDR1(dist=48485), STARD3NL(dist=177781)   | intergenic     |
| 11 | 35744080  | G | T | rs3105265               | 5.38E-05 | 0.101 | 0.065 | 1.61 | 1.22 | -2.14 | 3.70E-02 | 0.096 | 0.069 | 1.43 | 1.04 | -1.98 | 1.77 | 9.55E-06 | TRIM44                                     | intronic       |
| 11 | 35703291  | T | C | rs531239                | 5.02E-05 | 0.103 | 0.066 | 1.62 | 1.22 | -2.14 | 4.28E-02 | 0.092 | 0.067 | 1.42 | 1.02 | -1.97 | 1.77 | 9.61E-06 | TRIM44                                     | intronic       |
| 11 | 35704316  | T | C | rs561462                | 5.02E-05 | 0.103 | 0.066 | 1.62 | 1.22 | -2.14 | 4.28E-02 | 0.092 | 0.067 | 1.42 | 1.02 | -1.97 | 1.77 | 9.61E-06 | TRIM44                                     | intronic       |
| 11 | 35746852  | A | G | rs3110370               | 5.39E-05 | 0.101 | 0.065 | 1.61 | 1.22 | -2.14 | 3.72E-02 | 0.096 | 0.069 | 1.43 | 1.04 | -1.98 | 1.77 | 9.63E-06 | TRIM44                                     | intronic       |
| 11 | 35750668  | A | G | rs3118130               | 5.42E-05 | 0.101 | 0.065 | 1.61 | 1.22 | -2.14 | 3.71E-02 | 0.096 | 0.069 | 1.43 | 1.04 | -1.98 | 1.77 | 9.65E-06 | TRIM44                                     | intronic       |
| 4  | 14493091  | A | G | rs57827316              | 3.68E-06 | 0.060 | 0.030 | 2.08 | 1.43 | -3.02 | 2.98E-01 | 0.036 | 0.028 | 1.29 | 0.77 | -2.13 | 2.55 | 9.69E-06 | LINC00504                                  | ncRNA_intronic |
| 2  | 45114950  | G | A | rs79321422              | 5.40E-02 | 0.072 | 0.059 | 1.24 | 0.9  | -1.71 | 2.42E-06 | 0.092 | 0.045 | 2.13 | 1.53 | -2.98 | 2.00 | 9.74E-06 | CAMKMT(dist=115219), SIX3-AS1(dist=52343)  | intergenic     |
| 6  | 32485222  | C | T | rs1137496               | 3.08E-06 | 0.557 | 0.485 | 0.75 | 0.64 | -0.88 | 8.39E-02 | 0.456 | 0.493 | 0.86 | 0.71 | -1.04 | 0.68 | 9.78E-06 | HLA-DRB5(NM_002125.c.*294G>A)              | UTR3           |
| 6  | 32459025  | A | T | rs115662768             | 3.59E-06 | 0.232 | 0.298 | 0.71 | 0.59 | -0.86 | 6.32E-02 | 0.291 | 0.333 | 0.82 | 0.67 | -1.01 | 0.68 | 9.79E-06 | HLA-DRA(dist=46199), HLA-DRB5(dist=26129)  | intergenic     |
| 6  | 32568596  | G | A | rs9270758               | 1.11E-02 | 0.422 | 0.378 | 0.83 | 0.71 | -0.98 | 4.38E-05 | 0.397 | 0.313 | 0.69 | 0.57 | -0.84 | 0.71 | 9.81E-06 | HLA-DRB1(dist=10983), HLA-DQA1(dist=36587) | intergenic     |
| 5  | 177786775 | T | C | rs34413260              | 6.37E-06 | 0.169 | 0.122 | 1.46 | 1.17 | -1.83 | 6.69E-02 | 0.114 | 0.134 | 0.83 | 0.62 | -1.12 | 2.11 | 9.86E-06 | COL23A1                                    | intronic       |
| 3  | 101654496 | G | C | rs12497326              | 5.71E-02 | 0.110 | 0.083 | 1.38 | 1.05 | -1.8  | 6.70E-06 | 0.164 | 0.107 | 1.64 | 1.27 | -2.12 | 1.64 | 9.91E-06 | NFKBIZ(dist=74627), LOC152225(dist=5207)   | intergenic     |
| 6  | 32633426  | G | C | rs9274462               | 2.23E-05 | 0.126 | 0.190 | 0.62 | 0.49 | -0.78 | 2.68E-02 | 0.145 | 0.187 | 0.73 | 0.56 | -0.96 | 0.67 | 9.99E-06 | HLA-DQB1                                   | intronic       |
| 6  | 32469957  | A | G | rs75505821              | 4.29E-05 | 0.243 | 0.306 | 0.73 | 0.6  | -0.88 | 1.91E-02 | 0.274 | 0.325 | 0.78 | 0.64 | -0.97 | 0.69 | 9.99E-06 | HLA-DRA(dist=57131), HLA-DRB5(dist=15197)  | intergenic     |
| 3  | 101614309 | T | G | rs77498321              | 8.65E-02 | 0.109 | 0.084 | 1.35 | 1.03 | -1.76 | 2.63E-06 | 0.160 | 0.100 | 1.72 | 1.33 | -2.23 | 1.63 | 1.00E-05 | NFKBIZ(dist=34440), LOC152225(dist=45394)  | intergenic     |
| 6  | 32495962  | T | C | rs111344168             | 4.45E-06 | 0.333 | 0.264 | 0.72 | 0.6  | -0.86 | 6.01E-02 | 0.262 | 0.228 | 0.83 | 0.67 | -1.03 | 0.67 | 1.00E-05 | HLA-DRB5                                   | intronic       |
| 7  | 38039819  | C | T | rs4517022               | 1.94E-02 | 0.519 | 0.467 | 1.23 | 1.05 | -1.45 | 2.83E-05 | 0.581 | 0.484 | 1.48 | 1.23 | -1.79 | 1.32 | 1.01E-05 | EPDR1(dist=48277), STARD3NL(dist=177989)   | intergenic     |
| 6  | 32495377  | T | G | rs150721717             | 4.63E-05 | 0.199 | 0.256 | 0.72 | 0.59 | -0.88 | 2.12E-02 | 0.216 | 0.260 | 0.78 | 0.63 | -0.98 | 0.66 | 1.01E-05 | HLA-DRB5                                   | intronic       |
| 6  | 32473740  | G | T | rs112365225             | 9.89E-06 | 0.291 | 0.361 | 0.72 | 0.61 | -0.86 | 4.62E-02 | 0.333 | 0.379 | 0.82 | 0.67 | -1    | 0.70 | 1.02E-05 | HLA-DRA(dist=60914), HLA-DRB5(dist=11414)  | intergenic     |
| 3  | 101613751 | C | T | rs74951263              | 8.79E-02 | 0.109 | 0.083 | 1.34 | 1.03 | -1.76 | 2.76E-06 | 0.160 | 0.100 | 1.72 | 1.33 | -2.23 | 1.63 | 1.02E-05 | NFKBIZ(dist=33882), LOC152225(dist=45952)  | intergenic     |
| 6  | 32496202  | C | G | rs116232911             | 1.54E-05 | 0.399 | 0.460 | 0.78 | 0.66 | -0.92 | 3.26E-02 | 0.537 | 0.495 | 0.84 | 0.7  | -1.02 | 0.68 | 1.02E-05 | HLA-DRB5                                   | intronic       |
| 6  | 32531923  | G | A | rs35366052              | 3.47E-05 | 0.266 | 0.206 | 0.72 | 0.59 | -0.86 | 1.92E-02 | 0.225 | 0.184 | 0.78 | 0.62 | -0.97 | 0.66 | 1.02E-05 | HLA-DRB6(dist=4144), HLA-DRB1(dist=14624)  | intergenic     |
| 6  | 32634126  | G | A | rs9274505               | 5.30E-05 | 0.117 | 0.177 | 0.62 | 0.48 | -0.79 | 1.58E-02 | 0.136 | 0.178 | 0.72 | 0.55 | -0.95 | 0.67 | 1.02E-05 | HLA-DQB1                                   | intronic       |
| 6  | 32501395  | T | C | rs72851021              | 1.07E-02 | 0.316 | 0.275 | 0.82 | 0.69 | -0.98 | 5.96E-05 | 0.310 | 0.235 | 0.68 | 0.56 | -0.84 | 0.69 | 1.03E-05 | HLA-DRB5(dist=3389), HLA-DRB6(dist=19095)  | intergenic     |
| 9  | 117827060 | C | T | rs61738263              | 2.94E-05 | 0.080 | 0.044 | 1.90 | 1.38 | -2.62 | 5.50E-02 | 0.062 | 0.042 | 1.50 | 1.01 | -2.23 | 1.98 | 1.05E-05 | TNC                                        | exonic         |
| 3  | 101613851 | T | G | rs79576389              | 8.72E-02 | 0.110 | 0.084 | 1.35 | 1.03 | -1.76 | 2.75E-06 | 0.160 | 0.100 | 1.72 | 1.33 | -2.23 | 1.63 | 1.05E-05 | NFKBIZ(dist=33982), LOC152225(dist=45852)  | intergenic     |
| 6  | 32474088  | C | T | rs74930081              | 3.62E-06 | 0.276 | 0.347 | 0.72 | 0.6  | -0.86 | 6.54E-02 | 0.325 | 0.368 | 0.83 | 0.68 | -1.01 | 0.70 | 1.05E-05 | HLA-DRA(dist=61262), HLA-DRB5(dist=11066)  | intergenic     |
| 3  | 101612337 | C | T | rs35756196              | 8.49E-02 |       |       |      |      |       |          |       |       |      |      |       |      |          |                                            |                |

|    |           |   |   |                                               |          |       |       |      |      |       |          |       |       |      |      |       |      |          |                                                |                |
|----|-----------|---|---|-----------------------------------------------|----------|-------|-------|------|------|-------|----------|-------|-------|------|------|-------|------|----------|------------------------------------------------|----------------|
| 6  | 32493438  | T | C | rs114202038                                   | 6.49E-05 | 0.071 | 0.112 | 0.61 | 0.45 | -0.83 | 1.27E-02 | 0.090 | 0.126 | 0.69 | 0.5  | -0.95 | 0.57 | 1.12E-05 | HLA-DRB5                                       | intronic       |
| 11 | 35734910  | A | G | rs3112060                                     | 5.07E-05 | 0.103 | 0.066 | 1.62 | 1.22 | -2.14 | 4.43E-02 | 0.097 | 0.070 | 1.42 | 1.03 | -1.95 | 1.74 | 1.12E-05 | TRIM44                                         | intronic       |
| 6  | 32468869  | T | G | rs78930215                                    | 4.27E-05 | 0.087 | 0.132 | 0.63 | 0.47 | -0.83 | 2.24E-02 | 0.093 | 0.124 | 0.73 | 0.53 | -1    | 0.58 | 1.12E-05 | HLA-DRA(dist=56043), HLA-DRB5(dist=16285)      | intergenic     |
| 11 | 35740224  | A | G | rs3118131                                     | 5.08E-05 | 0.103 | 0.066 | 1.62 | 1.22 | -2.14 | 4.46E-02 | 0.097 | 0.070 | 1.42 | 1.03 | -1.95 | 1.74 | 1.13E-05 | TRIM44                                         | intronic       |
| 9  | 123661769 | G | A | rs7023254                                     | 5.29E-05 | 0.242 | 0.186 | 1.40 | 1.15 | -1.7  | 3.64E-02 | 0.210 | 0.169 | 1.31 | 1.04 | -1.64 | 1.45 | 1.13E-05 | PHF19(dist=4595), TRAF1(dist=2902)             | intergenic     |
| 6  | 32469929  | A | G | rs75686932                                    | 4.64E-05 | 0.280 | 0.345 | 0.74 | 0.62 | -0.88 | 1.90E-02 | 0.322 | 0.373 | 0.80 | 0.65 | -0.97 | 0.70 | 1.14E-05 | HLA-DRA(dist=57103), HLA-DRB5(dist=15225)      | intergenic     |
| 9  | 123658460 | C | T | rs55653034                                    | 5.22E-05 | 0.242 | 0.186 | 1.40 | 1.15 | -1.7  | 3.70E-02 | 0.211 | 0.170 | 1.30 | 1.03 | -1.64 | 1.45 | 1.15E-05 | PHF19(dist=1286), TRAF1(dist=6211)             | intergenic     |
| 19 | 56283664  | C | G | rs7260322                                     | 1.07E-05 | 0.356 | 0.283 | 0.71 | 0.6  | -0.85 | 8.58E-01 | 0.361 | 0.372 | 1.05 | 0.86 | -1.27 | 0.57 | 1.15E-05 | RFFL4L1                                        | intronic       |
| 11 | 35732980  | A | G | rs3112059                                     | 5.10E-05 | 0.103 | 0.066 | 1.62 | 1.22 | -2.14 | 4.52E-02 | 0.097 | 0.070 | 1.42 | 1.03 | -1.95 | 1.74 | 1.15E-05 | TRIM44                                         | intronic       |
| 9  | 123655938 | C | T | rs7848494                                     | 5.22E-05 | 0.242 | 0.186 | 1.40 | 1.15 | -1.7  | 3.71E-02 | 0.211 | 0.170 | 1.30 | 1.03 | -1.64 | 1.45 | 1.15E-05 | PHF19                                          | intronic       |
| 6  | 32646366  | T | G | rs28755314                                    | 1.27E-02 | 0.189 | 0.228 | 0.79 | 0.64 | -0.97 | 4.60E-05 | 0.146 | 0.220 | 0.60 | 0.46 | -0.79 | 0.68 | 1.15E-05 | HLA-DQB1(dist=11900), HLA-DQA2(dist=62797)     | intergenic     |
| 3  | 101660225 | G | C | rs75564788                                    | 7.13E-02 | 0.108 | 0.081 | 1.37 | 1.04 | -1.79 | 5.11E-06 | 0.162 | 0.105 | 1.65 | 1.27 | -2.13 | 1.65 | 1.16E-05 | LOC152225                                      | ncRNA_intronic |
| 6  | 32592950  | C | T | rs9271683                                     | 5.43E-06 | 0.407 | 0.321 | 0.70 | 0.59 | -0.82 | 7.11E-02 | 0.360 | 0.311 | 0.80 | 0.66 | -0.97 | 0.73 | 1.16E-05 | HLA-DRB1(dist=35337), HLA-DQA1(dist=12233)     | intergenic     |
| 10 | 134957848 | G | A | rs11598465                                    | 3.21E-01 | 0.037 | 0.040 | 0.92 | 0.6  | -1.41 | 7.67E-06 | 0.071 | 0.047 | 1.53 | 1.05 | -2.21 | 5.74 | 1.17E-05 | ADGRA1(dist=12669), KNDC1(dist=16123)          | intergenic     |
| 11 | 35752990  | A | G | rs3105264                                     | 5.54E-05 | 0.103 | 0.066 | 1.62 | 1.22 | -2.14 | 4.36E-02 | 0.096 | 0.070 | 1.42 | 1.03 | -1.96 | 1.74 | 1.18E-05 | TRIM44                                         | intronic       |
| 6  | 32632567  | A | C | rs9274373                                     | 6.35E-05 | 0.071 | 0.118 | 0.57 | 0.42 | -0.78 | 1.65E-02 | 0.096 | 0.130 | 0.72 | 0.52 | -0.98 | 0.61 | 1.18E-05 | HLA-DQB1                                       | intronic       |
| 6  | 32683708  | A | G | rs9275608                                     | 5.78E-05 | 0.355 | 0.287 | 1.37 | 1.15 | -1.62 | 1.81E-02 | 0.333 | 0.273 | 1.33 | 1.09 | -1.62 | 1.38 | 1.19E-05 | HLA-DQB1(dist=49242), HLA-DQA2(dist=25455)     | intergenic     |
| 6  | 32683713  | C | G | rs9275609                                     | 5.81E-05 | 0.355 | 0.287 | 1.37 | 1.15 | -1.62 | 1.81E-02 | 0.333 | 0.273 | 1.33 | 1.09 | -1.62 | 1.38 | 1.19E-05 | HLA-DQB1(dist=49242), HLA-DQA2(dist=25450)     | intergenic     |
| 6  | 32630862  | G | A | NA                                            | 1.76E-05 | 0.114 | 0.173 | 0.61 | 0.48 | -0.78 | 4.12E-02 | 0.127 | 0.161 | 0.76 | 0.58 | -1.01 | 0.65 | 1.20E-05 | HLA-DQA1(dist=3992), HLA-DQB1(dist=11820)      | intergenic     |
| 7  | 38059421  | G | A | rs62444582                                    | 2.38E-02 | 0.477 | 0.430 | 1.21 | 1.03 | -1.43 | 2.72E-05 | 0.528 | 0.429 | 1.49 | 1.23 | -1.79 | 1.33 | 1.20E-05 | EPDR1(dist=67879), STARD3NL(dist=158387)       | intergenic     |
| 6  | 32633749  | A | G | rs9274479                                     | 6.30E-05 | 0.104 | 0.159 | 0.62 | 0.48 | -0.8  | 1.39E-02 | 0.135 | 0.178 | 0.72 | 0.55 | -0.94 | 0.66 | 1.21E-05 | HLA-DQB1                                       | intronic       |
| 3  | 101612551 | C | G | rs386663954;rs1249710                         | 8.25E-02 | 0.110 | 0.084 | 1.35 | 1.03 | -1.76 | 4.09E-06 | 0.160 | 0.101 | 1.70 | 1.31 | -2.2  | 1.63 | 1.21E-05 | NFKBIZ(dist=32682), LOC152225(dist=47152)      | intergenic     |
| 7  | 38052934  | C | T | rs7811382                                     | 1.70E-02 | 0.501 | 0.450 | 1.23 | 1.04 | -1.44 | 5.35E-05 | 0.547 | 0.449 | 1.48 | 1.23 | -1.79 | 1.32 | 1.21E-05 | EPDR1(dist=61392), STARD3NL(dist=164874)       | intergenic     |
| 6  | 32481749  | C | T | rs115405728                                   | 1.24E-05 | 0.205 | 0.268 | 0.70 | 0.58 | -0.86 | 4.11E-02 | 0.258 | 0.303 | 0.80 | 0.65 | -0.99 | 0.69 | 1.22E-05 | HLA-DRA(dist=68923), HLA-DRB5(dist=3405)       | intergenic     |
| 6  | 32474008  | G | C | rs75795023                                    | 7.37E-06 | 0.402 | 0.474 | 0.75 | 0.63 | -0.88 | 5.76E-02 | 0.522 | 0.482 | 0.85 | 0.71 | -1.03 | 0.70 | 1.22E-05 | HLA-DRA(dist=61182), HLA-DRB5(dist=11146)      | intergenic     |
| 12 | 120121050 | G | A | rs278154                                      | 4.36E-05 | 0.259 | 0.331 | 0.70 | 0.59 | -0.85 | 5.16E-02 | 0.299 | 0.338 | 0.84 | 0.68 | -1.03 | 0.73 | 1.24E-05 | PRKAB1(dist=1621), CIT(dist=2545)              | intergenic     |
| 9  | 4279312   | A | T | rs58160383                                    | 5.62E-05 | 0.203 | 0.162 | 1.32 | 1.08 | -1.63 | 3.58E-02 | 0.176 | 0.142 | 1.30 | 1.01 | -1.66 | 1.66 | 1.24E-05 | GLIS3                                          | intronic       |
| 6  | 32633174  | C | T | rs9274437                                     | 3.66E-05 | 0.122 | 0.184 | 0.62 | 0.49 | -0.79 | 2.51E-02 | 0.140 | 0.181 | 0.73 | 0.56 | -0.96 | 0.67 | 1.25E-05 | HLA-DQB1                                       | intronic       |
| 6  | 32518960  | A | T | rs28653112                                    | 4.40E-05 | 0.378 | 0.441 | 0.77 | 0.65 | -0.91 | 2.25E-02 | 0.395 | 0.443 | 0.82 | 0.68 | -0.99 | 0.69 | 1.25E-05 | HLA-DRB5(dist=20954), HLA-DRB6(dist=1530)      | intergenic     |
| 6  | 32602482  | T | C | rs3104369;rs386699529                         | 1.02E-05 | 0.400 | 0.357 | 0.71 | 0.6  | -0.83 | 5.27E-02 | 0.404 | 0.352 | 0.80 | 0.66 | -0.97 | 0.74 | 1.25E-05 | HLA-DRB1(dist=44869), HLA-DQA1(dist=2701)      | intergenic     |
| 6  | 32595083  | G | T | rs3129768                                     | 5.72E-06 | 0.401 | 0.318 | 0.69 | 0.59 | -0.82 | 7.53E-02 | 0.358 | 0.309 | 0.80 | 0.66 | -0.98 | 0.73 | 1.25E-05 | HLA-DRB1(dist=37470), HLA-DQA1(dist=10100)     | intergenic     |
| 4  | 8214005   | G | A | rs1712286                                     | 1.28E-05 | 0.391 | 0.330 | 0.77 | 0.65 | -0.91 | 1.48E-02 | 0.305 | 0.271 | 0.85 | 0.69 | -1.04 | 0.64 | 1.26E-05 | SH3TC1                                         | intronic       |
| 6  | 32473412  | T | C | rs112707813                                   | 6.00E-06 | 0.438 | 0.365 | 0.74 | 0.62 | -0.87 | 7.61E-02 | 0.361 | 0.329 | 0.87 | 0.71 | -1.05 | 0.68 | 1.26E-05 | HLA-DRA(dist=60586), HLA-DRB5(dist=11742)      | intergenic     |
| 6  | 32541377  | C | T | rs9269408                                     | 4.59E-06 | 0.201 | 0.261 | 0.71 | 0.58 | -0.87 | 5.27E-06 | 0.252 | 0.333 | 0.67 | 0.54 | -0.83 | 0.55 | 1.27E-05 | HLA-DRB6(dist=13598), HLA-DRB1(dist=5170)      | intergenic     |
| 18 | 71383778  | C | T | rs9956373                                     | 1.27E-05 | 0.237 | 0.167 | 1.55 | 1.27 | -1.88 | 1.07E-01 | 0.227 | 0.211 | 1.10 | 0.88 | -1.38 | 1.52 | 1.27E-05 | LOC100505817(dist=366654), FBXO15(dist=356810) | intergenic     |
| 6  | 32594274  | T | C | rs9271771                                     | 5.83E-06 | 0.426 | 0.343 | 0.70 | 0.6  | -0.83 | 7.32E-02 | 0.362 | 0.313 | 0.80 | 0.66 | -0.97 | 0.73 | 1.29E-05 | HLA-DRB1(dist=36661), HLA-DQA1(dist=10909)     | intergenic     |
| 6  | 32635296  | C | T | rs77296290                                    | 9.94E-06 | 0.127 | 0.195 | 0.60 | 0.47 | -0.76 | 5.45E-02 | 0.151 | 0.189 | 0.76 | 0.59 | -0.99 | 0.68 | 1.31E-05 | HLA-DQB1                                       | upstream       |
| 6  | 32633928  | G | A | rs9274497                                     | 4.17E-05 | 0.121 | 0.183 | 0.62 | 0.48 | -0.79 | 2.21E-02 | 0.149 | 0.193 | 0.73 | 0.56 | -0.95 | 0.68 | 1.31E-05 | HLA-DQB1                                       | intronic       |
| 3  | 101624229 | G | A | rs12497281                                    | 5.86E-02 | 0.094 | 0.070 | 1.38 | 1.03 | -1.84 | 9.05E-06 | 0.131 | 0.080 | 1.73 | 1.3  | -2.29 | 1.73 | 1.33E-05 | NFKBIZ(dist=44360), LOC152225(dist=35474)      | intergenic     |
| 6  | 32473099  | C | T | rs116274877;rs200021281                       | 1.55E-06 | 0.339 | 0.415 | 0.72 | 0.61 | -0.86 | 1.38E-01 | 0.417 | 0.453 | 0.86 | 0.71 | -1.04 | 0.71 | 1.35E-05 | HLA-DRA(dist=60273), HLA-DRB5(dist=12055)      | intergenic     |
| 6  | 32683121  | G | A | rs3104409                                     | 4.86E-05 | 0.423 | 0.493 | 0.76 | 0.64 | -0.89 | 2.40E-02 | 0.527 | 0.467 | 0.79 | 0.65 | -0.95 | 0.73 | 1.35E-05 | HLA-DQB1(dist=48655), HLA-DQA2(dist=26042)     | intergenic     |
| 11 | 17339067  | A | C | rs72863686                                    | 3.41E-01 | 0.029 | 0.022 | 1.35 | 0.82 | -2.22 | 4.16E-08 | 0.077 | 0.042 | 1.89 | 1.32 | -2.71 | 2.66 | 1.36E-05 | NUCB2                                          | intronic       |
| 6  | 32592794  | G | T | rs386699516;rs386699517;rs9271671;rs386699518 | 7.38E-06 | 0.408 | 0.325 | 0.70 | 0.59 | -0.83 | 6.94E-02 | 0.360 | 0.311 | 0.80 | 0.66 | -0.97 | 0.73 | 1.36E-05 | HLA-DRB1(dist=35181), HLA-DQA1(dist=12389)     | intergenic     |
| 11 | 35782213  | T | G | rs113822594                                   | 5.88E-05 | 0.104 | 0.067 | 1.61 | 1.22 | -2.13 | 4.62E-02 | 0.098 | 0.071 | 1.42 | 1.04 | -1.96 | 1.72 | 1.36E-05 | TRIM44                                         | intronic       |
| 12 | 32473989  | G | C | rs143598820                                   | 2.39E-02 | 0.034 | 0.022 | 1.57 | 0.98 | -2.52 | 4.38E-05 | 0.049 | 0.022 | 2.30 | 1.46 | -3.6  | 2.69 | 1.37E-05 | BICD1                                          | intronic       |
| 6  | 32483024  | A | T | rs112100135                                   | 1.34E-05 | 0.309 | 0.380 | 0.73 | 0.61 | -0.87 | 5.20E-02 | 0.382 | 0.427 | 0.83 | 0.68 | -1    | 0.71 | 1.37E-05 | HLA-DRA(dist=70198), HLA-DRB5(dist=2130)       | intergenic     |
| 6  | 32460759  | A | G | rs115228941                                   | 4.74E-05 | 0.339 | 0.404 | 0.75 | 0.64 | -0.9  | 2.37E-02 | 0.357 | 0.408 | 0.80 | 0.66 | -0.98 | 0.70 | 1.38E-05 | HLA-DRA(dist=47933), HLA-DRB5(dist=24395)      | intergenic     |
| 6  | 32593479  | C | T | rs9271719                                     | 5.40E-06 | 0.415 | 0.332 | 0.70 | 0.59 | -0.83 | 8.04E-02 | 0.357 | 0.309 | 0.81 | 0.66 | -0.98 | 0.73 | 1.39E-05 | HLA-DRB1(dist=35866), HLA-DQA1(dist=11704)     | intergenic     |
| 3  | 101605961 | A | T | rs35824656                                    | 4.89E-02 | 0.164 | 0.132 | 1.28 | 1.03 | -1.61 | 9.34E-06 | 0.203 | 0.144 | 1.52 | 1.2  | -1.92 | 1.54 | 1.41E-05 | NFKBIZ(dist=26092), LOC152225(dist=53742)      | intergenic     |
| 6  | 32473101  | A | G | rs115428791                                   | 2.91E-06 | 0.339 | 0.413 | 0.73 | 0.61 | -0.87 | 1.09E-01 | 0.409 | 0.447 | 0.86 | 0.71 | -1.03 | 0.71 | 1.45E-05 | HLA-DRA(dist=60275), HLA-DRB5(dist=12053)      | intergenic     |
| 9  | 81248146  | C | G | rs3009687                                     | 5.41E-07 | 0.287 | 0.203 | 1.58 | 1.32 | -1.91 | 4.37E-01 | 0.233 | 0.225 | 1.05 | 0.84 | -1.31 | 1.45 | 1.46E-05 | PSAT1(dist=303137), LOC101927450(dist=502192)  | intergenic     |
| 6  | 32554420  | C | G | rs9270092                                     | 5.78E-05 | 0.363 | 0.306 | 0.77 | 0.65 | -0.92 | 1.87E-02 | 0.330 | 0.286 | 0.81 | 0.67 | -0.99 | 0.67 | 1.46E-05 | HLA-DRB1                                       | intronic       |
| 6  | 32469662  | C | T | rs116191291                                   | 2.42E-05 | 0.313 | 0.382 | 0.74 | 0.62 | -0.88 | 3.80E-02 | 0.353 | 0.400 | 0.82 | 0.67 | -1    | 0.71 | 1.46E-05 | HLA-DRA(dist=56836), HLA-DRB5(dist=15492)      | intergenic     |
| 6  | 32488710  | G | A | rs139860555                                   | 6.04E-05 | 0.341 | 0.281 | 0.76 | 0.64 | -0.9  | 1.87E-02 | 0.256 | 0.214 | 0.79 | 0.64 | -0.98 | 0.67 | 1.46E-05 | HLA-DRB5                                       | intronic       |
| 11 | 35786434  | A | G | rs11033268                                    | 5.97E-05 | 0.104 | 0.067 | 1.61 | 1.22 | -2.13 | 4.85E-02 | 0.099 | 0.072 | 1.42 | 1.03 | -1.95 | 1.72 | 1.47E-05 | TRIM44                                         | intronic       |
| 6  | 32594328  | C | T | rs9271775                                     | 5.09E-06 | 0.386 | 0.303 | 0.69 | 0.58 | -0.82 | 9.13E-02 | 0.342 | 0.296 | 0.81 | 0.67 | -0.99 | 0.73 | 1.49E-05 | HLA-DRB1(dist=36715), HLA-DQA1(dist=10855)     | intergenic     |
| 6  | 32456778  | T | G | rs7                                           |          |       |       |      |      |       |          |       |       |      |      |       |      |          |                                                |                |

|    |           |   |   |                                   |          |       |       |      |      |       |          |       |       |      |      |       |      |          |                                                |  |                |
|----|-----------|---|---|-----------------------------------|----------|-------|-------|------|------|-------|----------|-------|-------|------|------|-------|------|----------|------------------------------------------------|--|----------------|
| 6  | 32632326  | G | A | rs9274340                         | 1.05E-05 | 0.070 | 0.118 | 0.56 | 0.41 | -0.77 | 5.33E-02 | 0.099 | 0.126 | 0.76 | 0.56 | -1.04 | 0.60 | 1.56E-05 | HLA-DQB1                                       |  | intronic       |
| 6  | 32591976  | C | A | rs9271629                         | 8.72E-06 | 0.401 | 0.320 | 0.70 | 0.59 | -0.83 | 7.15E-02 | 0.358 | 0.309 | 0.80 | 0.66 | -0.98 | 0.73 | 1.58E-05 | HLA-DRB1(dist=34363), HLA-DQA1(dist=13207)     |  | intergenic     |
| 6  | 32620228  | G | A | NA                                | 1.04E-05 | 0.117 | 0.182 | 0.60 | 0.47 | -0.76 | 6.36E-02 | 0.149 | 0.186 | 0.77 | 0.59 | -1    | 0.67 | 1.59E-05 | HLA-DQA1(dist=3992), HLA-DQB1(dist=11820)      |  | intergenic     |
| 6  | 32596309  | C | T | rs2036202                         | 7.35E-06 | 0.398 | 0.316 | 0.70 | 0.59 | -0.83 | 7.75E-02 | 0.358 | 0.309 | 0.80 | 0.66 | -0.98 | 0.73 | 1.60E-05 | HLA-DRB1(dist=38696), HLA-DQA1(dist=8874)      |  | intergenic     |
| 6  | 32485073  | G | A | rs199985765;rs187600503           | 1.42E-05 | 0.507 | 0.440 | 0.76 | 0.65 | -0.9  | 5.51E-02 | 0.425 | 0.389 | 0.86 | 0.71 | -1.04 | 0.68 | 1.61E-05 | HLA-DRB5                                       |  | downstream     |
| 6  | 32457242  | C | A | rs79357367                        | 1.36E-05 | 0.560 | 0.426 | 0.76 | 0.64 | -0.9  | 5.69E-02 | 0.420 | 0.466 | 0.83 | 0.69 | -1    | 0.70 | 1.61E-05 | HLA-DRA(dist=44416), HLA-DRB5(dist=27912)      |  | intergenic     |
| 1  | 152923113 | G | C | rs386635525;rs2066005             | 2.03E-06 | 0.310 | 0.226 | 0.65 | 0.54 | -0.77 | 2.06E-01 | 0.270 | 0.249 | 0.90 | 0.73 | -1.11 | 0.72 | 1.62E-05 | IVL(dist=38751), SPRR4(dist=20016)             |  | intergenic     |
| 6  | 32590916  | A | G | rs9271587                         | 1.75E-05 | 0.298 | 0.381 | 0.69 | 0.58 | -0.82 | 5.25E-02 | 0.327 | 0.377 | 0.80 | 0.66 | -0.98 | 0.74 | 1.63E-05 | HLA-DRB1(dist=33303), HLA-DQA1(dist=14267)     |  | intergenic     |
| 6  | 32457488  | C | T | rs77256976                        | 5.46E-05 | 0.550 | 0.484 | 0.77 | 0.65 | -0.9  | 2.37E-02 | 0.527 | 0.477 | 0.82 | 0.68 | -0.99 | 0.71 | 1.64E-05 | HLA-DRA(dist=44662), HLA-DRB5(dist=27666)      |  | intergenic     |
| 6  | 32519262  | A | G | rs68017248                        | 1.91E-02 | 0.342 | 0.306 | 0.85 | 0.71 | -1.01 | 5.35E-05 | 0.363 | 0.290 | 0.72 | 0.59 | -0.87 | 0.68 | 1.67E-05 | HLA-DRB5(dist=21256), HLA-DRB6(dist=1228)      |  | intergenic     |
| 18 | 71384334  | C | A | rs7231509                         | 1.09E-05 | 0.236 | 0.166 | 1.55 | 1.27 | -1.88 | 1.39E-01 | 0.227 | 0.212 | 1.09 | 0.87 | -1.36 | 1.51 | 1.67E-05 | LOC100505817(dist=367210), FBXO15(dist=356254) |  | intergenic     |
| 6  | 32494808  | C | G | rs112063507                       | 3.26E-05 | 0.309 | 0.370 | 0.76 | 0.64 | -0.9  | 3.95E-02 | 0.409 | 0.454 | 0.83 | 0.69 | -1    | 0.69 | 1.68E-05 | HLA-DRB5                                       |  | intronic       |
| 6  | 32593612  | A | G | rs9271731                         | 9.84E-06 | 0.415 | 0.334 | 0.71 | 0.6  | -0.84 | 6.81E-02 | 0.361 | 0.311 | 0.80 | 0.66 | -0.97 | 0.73 | 1.69E-05 | HLA-DRB1(dist=35999), HLA-DQA1(dist=11571)     |  | intergenic     |
| 1  | 152930426 | C | T | rs6690549                         | 2.74E-07 | 0.297 | 0.206 | 0.61 | 0.51 | -0.74 | 3.97E-01 | 0.239 | 0.228 | 0.94 | 0.75 | -1.17 | 0.71 | 1.69E-05 | IVL(dist=46064), SPRR4(dist=12703)             |  | intergenic     |
| 4  | 14490738  | A | C | rs114977043                       | 8.48E-06 | 0.063 | 0.031 | 2.08 | 1.45 | -3    | 3.31E-01 | 0.036 | 0.028 | 1.27 | 0.76 | -2.12 | 2.34 | 1.70E-05 | LINC00504                                      |  | ncRNA_intronic |
| 6  | 32473628  | G | T | rs114313885                       | 1.97E-05 | 0.300 | 0.369 | 0.73 | 0.61 | -0.87 | 5.02E-02 | 0.304 | 0.349 | 0.81 | 0.67 | -1    | 0.71 | 1.70E-05 | HLA-DRA(dist=60802), HLA-DRB5(dist=11526)      |  | intergenic     |
| 6  | 32646861  | C | T | rs28755342                        | 1.62E-02 | 0.224 | 0.263 | 0.81 | 0.67 | -0.98 | 5.25E-05 | 0.191 | 0.271 | 0.64 | 0.5  | -0.81 | 0.70 | 1.70E-05 | HLA-DQB1(dist=12395), HLA-DQA2(dist=62302)     |  | intergenic     |
| 6  | 32590899  | G | T | rs9271586                         | 1.86E-05 | 0.298 | 0.380 | 0.69 | 0.58 | -0.82 | 5.26E-02 | 0.327 | 0.377 | 0.80 | 0.66 | -0.98 | 0.74 | 1.71E-05 | HLA-DRB1(dist=33286), HLA-DQA1(dist=41284)     |  | intergenic     |
| 1  | 112393413 | A | G | rs17028807;rs144214515            | 3.40E-02 | 0.126 | 0.100 | 0.76 | 0.59 | -0.98 | 4.56E-05 | 0.181 | 0.120 | 0.62 | 0.48 | -0.79 | 0.64 | 1.71E-05 | KCND3                                          |  | intronic       |
| 6  | 32456812  | A | G | rs78999765                        | 1.67E-05 | 0.339 | 0.407 | 0.75 | 0.63 | -0.89 | 5.51E-02 | 0.407 | 0.451 | 0.84 | 0.69 | -1.01 | 0.71 | 1.71E-05 | HLA-DRA(dist=43986), HLA-DRB5(dist=28342)      |  | intergenic     |
| 7  | 38050493  | C | T | rs62444562                        | 2.82E-02 | 0.480 | 0.434 | 1.20 | 1.02 | -1.42 | 3.47E-05 | 0.530 | 0.432 | 1.48 | 1.23 | -1.79 | 1.32 | 1.71E-05 | EPDR1(dist=58951), STARD3NL(dist=167315)       |  | intergenic     |
| 6  | 32646866  | C | A | rs28755343                        | 1.63E-02 | 0.224 | 0.263 | 0.81 | 0.67 | -0.98 | 5.24E-05 | 0.191 | 0.271 | 0.64 | 0.5  | -0.81 | 0.70 | 1.71E-05 | HLA-DQB1(dist=12400), HLA-DQA2(dist=62297)     |  | intergenic     |
| 21 | 16800087  | C | T | rs7278277                         | 3.95E-05 | 0.557 | 0.473 | 0.71 | 0.61 | -0.84 | 5.73E-02 | 0.505 | 0.476 | 0.89 | 0.74 | -1.07 | 0.72 | 1.72E-05 | NRIP1(dist=362961), USP25(dist=302257)         |  | intergenic     |
| 6  | 32591777  | G | T | rs386699512;rs9271620             | 1.86E-05 | 0.296 | 0.378 | 0.69 | 0.58 | -0.82 | 5.27E-02 | 0.327 | 0.377 | 0.80 | 0.66 | -0.98 | 0.74 | 1.73E-05 | HLA-DRB1(dist=34164), HLA-DQA1(dist=13406)     |  | intergenic     |
| 7  | 9127934   | C | T | rs7809939                         | 3.92E-05 | 0.385 | 0.472 | 1.43 | 1.21 | -1.69 | 6.90E-02 | 0.407 | 0.447 | 1.18 | 0.97 | -1.42 | 1.32 | 1.73E-05 | NXPH1(dist=335341), PER4(dist=545966)          |  | intergenic     |
| 20 | 9722423   | G | A | rs8123945                         | 1.54E-02 | 0.082 | 0.059 | 1.43 | 1.05 | -1.94 | 4.85E-05 | 0.093 | 0.059 | 1.62 | 1.17 | -2.25 | 1.91 | 1.73E-05 | PAK7                                           |  | intronic       |
| 6  | 32459079  | A | G | rs111794387                       | 2.97E-05 | 0.355 | 0.415 | 0.78 | 0.66 | -0.92 | 3.57E-02 | 0.413 | 0.459 | 0.83 | 0.69 | -1    | 0.69 | 1.75E-05 | HLA-DRA(dist=46253), HLA-DRB5(dist=26075)      |  | intergenic     |
| 6  | 32493456  | A | T | rs116427677                       | 4.72E-05 | 0.081 | 0.123 | 0.63 | 0.47 | -0.84 | 2.30E-02 | 0.109 | 0.142 | 0.74 | 0.55 | -0.99 | 0.58 | 1.75E-05 | HLA-DRB5                                       |  | intronic       |
| 6  | 32481806  | A | T | rs184528465                       | 1.74E-05 | 0.365 | 0.301 | 0.75 | 0.63 | -0.89 | 4.89E-02 | 0.297 | 0.257 | 0.82 | 0.67 | -1.01 | 0.68 | 1.76E-05 | HLA-DRA(dist=68980), HLA-DRB5(dist=3348)       |  | intergenic     |
| 6  | 32533785  | A | G | rs79498062                        | 4.41E-05 | 0.311 | 0.250 | 0.74 | 0.62 | -0.88 | 2.68E-02 | 0.255 | 0.216 | 0.80 | 0.65 | -1    | 0.68 | 1.79E-05 | HLA-DRB6(dist=6006), HLA-DRB1(dist=12762)      |  | intergenic     |
| 13 | 108021464 | G | T | rs9587364                         | 1.54E-05 | 0.471 | 0.410 | 1.28 | 1.09 | -1.51 | 7.38E-01 | 0.439 | 0.427 | 1.05 | 0.87 | -1.27 | 1.62 | 1.79E-05 | FAM155A                                        |  | intronic       |
| 19 | 6442842   | G | T | rs111736649                       | 1.67E-05 | 0.090 | 0.053 | 1.77 | 1.31 | -2.39 | 6.51E-01 | 0.071 | 0.081 | 0.86 | 0.6  | -1.24 | 2.66 | 1.79E-05 | SLC25A23                                       |  | intronic       |
| 6  | 32634318  | C | A | rs3891176                         | 4.62E-05 | 0.118 | 0.178 | 0.62 | 0.48 | -0.79 | 2.67E-02 | 0.149 | 0.192 | 0.74 | 0.57 | -0.96 | 0.68 | 1.79E-05 | HLA-DQB1                                       |  | exonic         |
| 6  | 32592112  | A | G | rs9271634                         | 6.05E-06 | 0.423 | 0.341 | 0.71 | 0.6  | -0.83 | 9.35E-02 | 0.361 | 0.315 | 0.81 | 0.67 | -0.99 | 0.73 | 1.82E-05 | HLA-DRB1(dist=34499), HLA-DQA1(dist=13071)     |  | intergenic     |
| 20 | 8169380   | A | G | rs6118093                         | 5.16E-02 | 0.053 | 0.037 | 1.47 | 1.01 | -2.13 | 7.94E-06 | 0.074 | 0.036 | 2.13 | 1.47 | -3.08 | 2.07 | 1.83E-05 | PLCB1                                          |  | intronic       |
| 6  | 32526436  | G | A | rs67612510                        | 1.17E-05 | 0.344 | 0.411 | 0.75 | 0.63 | -0.89 | 7.70E-02 | 0.374 | 0.415 | 0.84 | 0.7  | -1.02 | 0.69 | 1.83E-05 | HLA-DRB6                                       |  | ncRNA_intronic |
| 6  | 32592775  | A | G | rs386699515;rs9271669;rs386699516 | 1.32E-05 | 0.407 | 0.328 | 0.71 | 0.6  | -0.84 | 6.39E-02 | 0.365 | 0.314 | 0.80 | 0.66 | -0.97 | 0.74 | 1.84E-05 | HLA-DRB1(dist=35162), HLA-DQA1(dist=12408)     |  | intergenic     |
| 6  | 32646904  | T | C | rs28755344                        | 1.84E-02 | 0.221 | 0.259 | 0.81 | 0.67 | -0.99 | 4.98E-05 | 0.190 | 0.269 | 0.64 | 0.5  | -0.81 | 0.70 | 1.84E-05 | HLA-DQB1(dist=12438), HLA-DQA2(dist=62259)     |  | intergenic     |
| 6  | 32568595  | T | C | rs9270757                         | 2.03E-02 | 0.409 | 0.368 | 0.84 | 0.71 | -1    | 3.94E-05 | 0.389 | 0.304 | 0.69 | 0.57 | -0.83 | 0.72 | 1.86E-05 | HLA-DRB1(dist=10982), HLA-DQA1(dist=36588)     |  | intergenic     |
| 7  | 9127173   | T | C | rs7791718                         | 4.95E-05 | 0.328 | 0.414 | 1.45 | 1.22 | -1.72 | 6.19E-02 | 0.344 | 0.380 | 1.17 | 0.96 | -1.42 | 1.34 | 1.88E-05 | NXPH1(dist=334580), PER4(dist=546727)          |  | intergenic     |
| 18 | 71381383  | C | T | rs4243344                         | 1.93E-05 | 0.228 | 0.161 | 1.54 | 1.26 | -1.88 | 1.12E-01 | 0.223 | 0.208 | 1.10 | 0.87 | -1.37 | 1.52 | 1.89E-05 | LOC100505817(dist=364259), FBXO15(dist=359205) |  | intergenic     |
| 16 | 84651252  | C | A | rs113495648                       | 7.40E-01 | 0.053 | 0.054 | 0.98 | 0.68 | -1.41 | 1.84E-05 | 0.069 | 0.039 | 1.82 | 1.25 | -2.66 | 4.48 | 1.91E-05 | COTL1                                          |  | intronic       |
| 6  | 32592116  | C | G | rs9271635                         | 6.39E-06 | 0.423 | 0.341 | 0.71 | 0.6  | -0.83 | 9.45E-02 | 0.361 | 0.315 | 0.81 | 0.67 | -0.99 | 0.73 | 1.92E-05 | HLA-DRB1(dist=34503), HLA-DQA1(dist=13067)     |  | intergenic     |
| 6  | 32590953  | T | C | rs9271588                         | 1.91E-05 | 0.298 | 0.380 | 0.69 | 0.58 | -0.82 | 5.73E-02 | 0.325 | 0.373 | 0.81 | 0.66 | -0.99 | 0.75 | 1.92E-05 | HLA-DRB1(dist=33340), HLA-DQA1(dist=14230)     |  | intergenic     |
| 7  | 38043899  | C | T | rs10951544                        | 3.22E-02 | 0.470 | 0.425 | 1.20 | 1.02 | -1.41 | 3.13E-05 | 0.525 | 0.426 | 1.49 | 1.24 | -1.8  | 1.32 | 1.93E-05 | EPDR1(dist=52357), STARD3NL(dist=173909)       |  | intergenic     |
| 3  | 101611539 | C | T | rs74909121                        | 6.05E-02 | 0.089 | 0.065 | 1.41 | 1.05 | -1.89 | 1.81E-05 | 0.128 | 0.078 | 1.74 | 1.3  | -2.31 | 1.70 | 1.93E-05 | NFKB1Z(dist=31670), LOC152225(dist=48164)      |  | intergenic     |
| 6  | 32593519  | G | A | rs9271721                         | 7.97E-06 | 0.422 | 0.341 | 0.71 | 0.6  | -0.84 | 8.30E-02 | 0.357 | 0.310 | 0.81 | 0.66 | -0.98 | 0.73 | 1.93E-05 | HLA-DRB1(dist=35906), HLA-DQA1(dist=11664)     |  | intergenic     |
| 6  | 32473239  | A | C | rs148422675                       | 1.54E-05 | 0.312 | 0.381 | 0.74 | 0.62 | -0.88 | 6.08E-02 | 0.376 | 0.419 | 0.84 | 0.69 | -1.01 | 0.71 | 1.94E-05 | HLA-DRA(dist=60413), HLA-DRB5(dist=11915)      |  | intergenic     |
| 6  | 32473251  | C | T | rs150559620                       | 1.98E-05 | 0.280 | 0.348 | 0.73 | 0.61 | -0.87 | 5.43E-02 | 0.336 | 0.381 | 0.82 | 0.68 | -1    | 0.71 | 1.94E-05 | HLA-DRA(dist=60425), HLA-DRB5(dist=11903)      |  | intergenic     |
| 6  | 32484813  | G | A | rs144763551                       | 7.43E-06 | 0.321 | 0.390 | 0.74 | 0.62 | -0.88 | 8.51E-02 | 0.374 | 0.414 | 0.84 | 0.7  | -1.02 | 0.71 | 1.94E-05 | HLA-DRB5                                       |  | downstream     |
| 5  | 84238028  | T | A | rs72766342                        | 2.06E-05 | 0.093 | 0.044 | 2.21 | 1.63 | -3.01 | 8.24E-02 | 0.094 | 0.081 | 1.17 | 0.85 | -1.61 | 1.86 | 1.95E-05 | EDIL3(dist=557343), NBPF22P(dist=1340234)      |  | intergenic     |
| 17 | 40543377  | C | T | rs114422057                       | 2.46E-02 | 0.088 | 0.067 | 1.35 | 1    | -1.81 | 4.90E-05 | 0.099 | 0.052 | 2.00 | 1.45 | -2.76 | 1.74 | 1.95E-05 | STAT3(dist=2864), PTRF(dist=11090)             |  | intergenic     |
| 6  | 32593199  | T | C | rs35545709;rs386699522;rs9271701  | 8.26E-06 | 0.430 | 0.350 | 0.71 | 0.6  | -0.84 | 8.33E-02 | 0.363 | 0.315 | 0.81 | 0.67 | -0.98 | 0.73 | 1.96E-05 | HLA-DRB1(dist=35586), HLA-DQA1(dist=11984)     |  | intergenic     |
| 6  | 32526854  | G | A | rs28483671                        | 2.36E-05 | 0.275 | 0.214 | 0.72 | 0.59 | -0.86 | 4.36E-02 | 0.214 | 0.179 | 0.80 | 0.64 | -1.01 | 0.67 | 1.97E-05 | HLA-DRB6                                       |  | ncRNA_intronic |
| 6  | 32630349  | G | T | rs548767328                       | 5.45E-05 | 0.097 | 0.150 | 0.61 | 0.47 | -0.8  | 3.00E-02 | 0.109 | 0.142 |      |      |       |      |          |                                                |  |                |

|    |           |   |   |                                   |          |       |       |      |      |       |          |       |       |      |      |       |      |          |                                             |                |
|----|-----------|---|---|-----------------------------------|----------|-------|-------|------|------|-------|----------|-------|-------|------|------|-------|------|----------|---------------------------------------------|----------------|
| 12 | 16856959  | A | G | rs115931161                       | 2.25E-05 | 0.103 | 0.074 | 1.43 | 1.09 | -1.89 | 2.63E-01 | 0.056 | 0.062 | 0.89 | 0.59 | -1.33 | 2.53 | 2.09E-05 | LMO3(dist=95811), SKP1P2(dist=284722)       | intergenic     |
| 6  | 32646396  | T | G | rs28755317                        | 1.96E-02 | 0.190 | 0.228 | 0.80 | 0.65 | -0.98 | 5.11E-05 | 0.143 | 0.217 | 0.60 | 0.46 | -0.78 | 0.69 | 2.10E-05 | HLA-DQB1(dist=11930), HLA-DQA2(dist=62767)  | intergenic     |
| 6  | 32592588  | T | C | rs9271658                         | 1.18E-05 | 0.409 | 0.328 | 0.71 | 0.6  | -0.83 | 7.65E-02 | 0.360 | 0.312 | 0.80 | 0.66 | -0.98 | 0.74 | 2.10E-05 | HLA-DRB1(dist=34975), HLA-DQA1(dist=12595)  | intergenic     |
| 7  | 38046029  | A | T | rs9639782                         | 3.36E-02 | 0.470 | 0.425 | 1.20 | 1.02 | -1.41 | 3.26E-05 | 0.525 | 0.426 | 1.49 | 1.23 | -1.8  | 1.31 | 2.11E-05 | EPDR1(dist=54487), STARD3NL(dist=171779)    | intergenic     |
| 6  | 32595031  | A | T | rs1304390                         | 1.06E-05 | 0.403 | 0.323 | 0.71 | 0.6  | -0.84 | 7.54E-02 | 0.358 | 0.309 | 0.80 | 0.66 | -0.98 | 0.73 | 2.11E-05 | HLA-DRB1(dist=37418), HLA-DQA1(dist=10152)  | intergenic     |
| 6  | 32502317  | G | A | rs78533241                        | 1.33E-05 | 0.226 | 0.292 | 0.71 | 0.59 | -0.86 | 7.01E-02 | 0.246 | 0.286 | 0.81 | 0.65 | -1.01 | 0.70 | 2.12E-05 | HLA-DRB5(dist=4311), HLA-DRB6(dist=18173)   | intergenic     |
| 6  | 32632065  | C | T | rs9274310                         | 5.27E-05 | 0.089 | 0.139 | 0.61 | 0.46 | -0.8  | 3.28E-02 | 0.102 | 0.133 | 0.74 | 0.54 | -1.01 | 0.62 | 2.12E-05 | HLA-DQB1                                    | intronic       |
| 6  | 32474512  | T | A | rs114495017                       | 1.19E-06 | 0.243 | 0.310 | 0.72 | 0.59 | -0.87 | 7.31E-02 | 0.306 | 0.347 | 0.83 | 0.68 | -1.02 | 0.70 | 2.13E-05 | HLA-DRA(dist=61686), HLA-DRB5(dist=10642)   | intergenic     |
| 16 | 24006879  | T | C | rs114744647                       | 5.75E-01 | 0.029 | 0.026 | 1.12 | 0.68 | -1.83 | 2.05E-05 | 0.054 | 0.034 | 1.62 | 1.06 | -2.47 | 7.83 | 2.13E-05 | PRKCB                                       | intronic       |
| 6  | 32593198  | G | C | rs9271700;rs35545709;rs386699522  | 9.90E-06 | 0.428 | 0.348 | 0.71 | 0.6  | -0.84 | 8.06E-02 | 0.361 | 0.314 | 0.81 | 0.66 | -0.98 | 0.74 | 2.13E-05 | HLA-DRB1(dist=35585), HLA-DQA1(dist=11985)  | intergenic     |
| 6  | 32630348  | A | T | rs9274170                         | 6.01E-05 | 0.098 | 0.151 | 0.61 | 0.47 | -0.8  | 3.04E-02 | 0.109 | 0.142 | 0.74 | 0.55 | -1    | 0.64 | 2.15E-05 | HLA-DQB1                                    | intronic       |
| 7  | 38039137  | T | C | rs6953285                         | 3.42E-02 | 0.475 | 0.430 | 1.20 | 1.02 | -1.41 | 3.14E-05 | 0.529 | 0.430 | 1.49 | 1.23 | -1.79 | 1.32 | 2.15E-05 | EPDR1(dist=47595), STARD3NL(dist=178671)    | intergenic     |
| 6  | 32492828  | T | C | rs187328263                       | 4.48E-02 | 0.237 | 0.263 | 0.87 | 0.72 | -1.05 | 1.10E-05 | 0.227 | 0.302 | 0.68 | 0.54 | -0.84 | 0.67 | 2.16E-05 | HLA-DRB5                                    | intronic       |
| 6  | 32457027  | A | T | rs79580861                        | 3.79E-05 | 0.347 | 0.412 | 0.76 | 0.64 | -0.9  | 3.88E-02 | 0.389 | 0.437 | 0.82 | 0.68 | -0.99 | 0.71 | 2.18E-05 | HLA-DRA(dist=44201), HLA-DRB5(dist=28127)   | intergenic     |
| 6  | 32633282  | T | C | rs9274447                         | 3.78E-05 | 0.118 | 0.179 | 0.62 | 0.48 | -0.79 | 3.85E-02 | 0.143 | 0.182 | 0.75 | 0.58 | -0.98 | 0.68 | 2.21E-05 | HLA-DQB1                                    | intronic       |
| 17 | 36480674  | A | G | rs73984500                        | 2.86E-05 | 0.066 | 0.038 | 1.81 | 1.28 | -2.56 | 7.05E-01 | 0.033 | 0.030 | 1.11 | 0.65 | -1.88 | 2.72 | 2.22E-05 | GPR179                                      | downstream     |
| 4  | 117542664 | A | G | rs114165527                       | 4.47E-05 | 0.088 | 0.059 | 1.53 | 1.14 | -2.06 | 6.99E-02 | 0.078 | 0.058 | 1.38 | 0.97 | -1.96 | 1.99 | 2.23E-05 | MIR1973(dist=321740), TRAM1L1(dist=462046)  | intergenic     |
| 12 | 3094597   | C | T | rs60885272                        | 2.42E-05 | 0.272 | 0.225 | 1.29 | 1.07 | -1.55 | 1.20E-01 | 0.244 | 0.214 | 1.19 | 0.96 | -1.48 | 1.53 | 2.24E-05 | TEAD4                                       | intronic       |
| 6  | 32473220  | G | T | rs112696783;rs201721454           | 8.60E-06 | 0.316 | 0.387 | 0.73 | 0.62 | -0.87 | 8.87E-02 | 0.390 | 0.431 | 0.84 | 0.7  | -1.02 | 0.71 | 2.25E-05 | HLA-DRA(dist=60394), HLA-DRB5(dist=11934)   | intergenic     |
| 6  | 32473636  | A | T | rs114666889                       | 5.32E-05 | 0.290 | 0.356 | 0.74 | 0.62 | -0.89 | 3.40E-02 | 0.296 | 0.343 | 0.80 | 0.65 | -0.99 | 0.71 | 2.27E-05 | HLA-DRA(dist=60810), HLA-DRB5(dist=11518)   | intergenic     |
| 6  | 32633231  | G | C | rs9274442                         | 4.33E-05 | 0.120 | 0.180 | 0.62 | 0.49 | -0.79 | 3.66E-02 | 0.143 | 0.182 | 0.75 | 0.57 | -0.98 | 0.68 | 2.27E-05 | HLA-DQB1                                    | intronic       |
| 6  | 32592567  | G | A | rs9271655                         | 1.16E-05 | 0.415 | 0.334 | 0.71 | 0.6  | -0.84 | 8.25E-02 | 0.367 | 0.319 | 0.81 | 0.67 | -0.98 | 0.74 | 2.30E-05 | HLA-DRB1(dist=34954), HLA-DQA1(dist=12616)  | intergenic     |
| 19 | 45199524  | C | T | rs73035597                        | 2.16E-05 | 0.131 | 0.085 | 1.62 | 1.26 | -2.09 | 8.51E-01 | 0.120 | 0.127 | 1.94 | 0.77 | -1.25 | 2.18 | 2.31E-05 | CEACAM19(dist=11897), CEACAM16(dist=2897)   | intergenic     |
| 6  | 32632113  | C | T | rs4538746                         | 2.61E-05 | 0.399 | 0.328 | 0.73 | 0.62 | -0.87 | 4.40E-02 | 0.354 | 0.311 | 0.83 | 0.68 | -1    | 0.72 | 2.31E-05 | HLA-DQB1                                    | intronic       |
| 2  | 211847236 | C | A | rs114943691                       | 6.00E-05 | 0.047 | 0.026 | 1.86 | 1.23 | -2.82 | 7.18E-02 | 0.037 | 0.026 | 1.41 | 0.85 | -2.34 | 2.85 | 2.33E-05 | CPS1(dist=303404), ERBB4(dist=393206)       | intergenic     |
| 17 | 36415297  | C | A | rs181566537                       | 3.03E-05 | 0.055 | 0.031 | 1.78 | 1.21 | -2.6  | 4.82E-01 | 0.024 | 0.021 | 1.18 | 0.64 | -2.18 | 3.44 | 2.35E-05 | LOC440434(dist=2041), MRPL45(dist=37692)    | intergenic     |
| 20 | 8163666   | G | T | rs6039073                         | 6.18E-02 | 0.053 | 0.038 | 1.44 | 0.99 | -2.09 | 6.90E-06 | 0.074 | 0.036 | 2.12 | 1.46 | -3.06 | 2.06 | 2.35E-05 | PLCB1                                       | intronic       |
| 2  | 211843253 | G | C | rs146535817                       | 6.09E-05 | 0.047 | 0.028 | 1.86 | 1.23 | -2.81 | 7.19E-02 | 0.037 | 0.026 | 1.41 | 0.85 | -2.34 | 2.85 | 2.36E-05 | PCP1(dist=299421), ERBB4(dist=397189)       | intergenic     |
| 19 | 56283680  | T | C | rs7245975                         | 2.22E-05 | 0.349 | 0.279 | 0.72 | 0.61 | -0.86 | 8.24E-01 | 0.356 | 0.367 | 1.05 | 0.86 | -1.27 | 0.57 | 2.38E-05 | RFP44L1                                     | intronic       |
| 6  | 32473641  | A | G | rs115214341                       | 3.77E-05 | 0.301 | 0.367 | 0.74 | 0.62 | -0.89 | 4.50E-02 | 0.343 | 0.387 | 0.82 | 0.68 | -1    | 0.71 | 2.39E-05 | HLA-DRA(dist=60815), HLA-DRB5(dist=11513)   | intergenic     |
| 7  | 64516780  | G | T | rs11771328                        | 3.18E-05 | 0.235 | 0.181 | 0.72 | 0.59 | -0.87 | 1.10E-01 | 0.208 | 0.172 | 0.80 | 0.63 | -1    | 0.68 | 2.40E-05 | CCT6P3                                      | ncRNA_intronic |
| 6  | 32546782  | G | A | rs116358897                       | 4.74E-05 | 0.065 | 0.102 | 0.61 | 0.44 | -0.84 | 3.06E-02 | 0.095 | 0.126 | 0.73 | 0.53 | -1    | 0.57 | 2.40E-05 | HLA-DRB1                                    | UTR3           |
| 18 | 59252440  | C | T | rs4941031                         | 3.66E-05 | 0.332 | 0.410 | 0.72 | 0.6  | -0.85 | 8.84E-02 | 0.392 | 0.434 | 0.84 | 0.69 | -1.02 | 0.75 | 2.40E-05 | CDH20(dist=30075), LINC01544(dist=162969)   | intergenic     |
| 9  | 88567760  | T | C | rs13296057                        | 5.94E-06 | 0.048 | 0.022 | 2.22 | 1.46 | -3.37 | 1.44E-01 | 0.042 | 0.038 | 1.12 | 0.7  | -1.78 | 3.07 | 2.43E-05 | NAA35                                       | intronic       |
| 6  | 32594061  | A | G | rs9271763                         | 2.67E-05 | 0.280 | 0.358 | 0.70 | 0.58 | -0.84 | 5.24E-02 | 0.327 | 0.376 | 0.80 | 0.66 | -0.98 | 0.74 | 2.47E-05 | HLA-DRB1(dist=36448), HLA-DQA1(dist=11122)  | intergenic     |
| 6  | 32473705  | G | A | rs147438709                       | 2.77E-05 | 0.283 | 0.350 | 0.73 | 0.61 | -0.87 | 5.44E-02 | 0.315 | 0.362 | 0.81 | 0.67 | -0.99 | 0.72 | 2.49E-05 | HLA-DRA(dist=60879), HLA-DRB5(dist=11449)   | intergenic     |
| 6  | 32456371  | A | C | rs78391724                        | 2.00E-05 | 0.328 | 0.394 | 0.75 | 0.63 | -0.89 | 6.33E-02 | 0.389 | 0.432 | 0.84 | 0.69 | -1.01 | 0.71 | 2.51E-05 | HLA-DRA(dist=43545), HLA-DRB5(dist=28783)   | intergenic     |
| 6  | 32630400  | A | G | rs200725664;rs9274175;rs148939946 | 3.71E-05 | 0.089 | 0.141 | 0.59 | 0.45 | -0.78 | 5.26E-02 | 0.099 | 0.126 | 0.76 | 0.56 | -1.04 | 0.63 | 2.52E-05 | HLA-DQB1                                    | intronic       |
| 3  | 142581313 | T | C | rs6810386                         | 2.75E-05 | 0.364 | 0.295 | 1.36 | 1.15 | -1.62 | 1.21E-01 | 0.325 | 0.281 | 1.24 | 1.01 | -1.51 | 1.35 | 2.52E-05 | PCOLCE2                                     | intronic       |
| 17 | 74860376  | A | G | rs8071900                         | 1.94E-05 | 0.514 | 0.431 | 1.40 | 1.19 | -1.65 | 2.51E-01 | 0.483 | 0.461 | 1.09 | 0.91 | -1.32 | 1.36 | 2.52E-05 | LOC101928514(dist=57192), MGAT5B(dist=4422) | intergenic     |
| 6  | 32630741  | C | T | rs17843717                        | 1.68E-05 | 0.104 | 0.162 | 0.60 | 0.46 | -0.78 | 6.62E-02 | 0.135 | 0.165 | 0.79 | 0.6  | -1.04 | 0.66 | 2.53E-05 | HLA-DQB1                                    | intronic       |
| 4  | 123851151 | A | C | rs17006333                        | 2.98E-05 | 0.086 | 0.049 | 1.81 | 1.33 | -2.46 | 1.37E-01 | 0.058 | 0.042 | 1.39 | 0.93 | -2.08 | 1.87 | 2.54E-05 | SPATA5                                      | intronic       |
| 18 | 52340837  | G | A | rs112101598                       | 9.13E-02 | 0.100 | 0.086 | 1.18 | 0.89 | -1.55 | 1.20E-06 | 0.121 | 0.067 | 1.92 | 1.43 | -2.57 | 1.69 | 2.54E-05 | DYNAP(dist=74113), RAB27B(dist=154871)      | intergenic     |
| 19 | 52767873  | G | A | rs117893720                       | 1.42E-01 | 0.040 | 0.031 | 1.33 | 0.87 | -2.04 | 3.81E-07 | 0.061 | 0.028 | 2.23 | 1.49 | -3.35 | 2.47 | 2.55E-05 | PPP2R1A(dist=38195), ZNF766(dist=4951)      | intergenic     |
| 3  | 188491591 | G | A | rs112350477                       | 2.47E-05 | 0.039 | 0.021 | 1.85 | 1.18 | -2.9  | 6.24E-01 | 0.021 | 0.023 | 0.93 | 0.49 | -1.78 | 5.79 | 2.58E-05 | LPP                                         | intronic       |
| 6  | 32628960  | T | C | rs2515895                         | 1.97E-05 | 0.123 | 0.187 | 0.61 | 0.48 | -0.77 | 6.83E-02 | 0.146 | 0.181 | 0.77 | 0.59 | -1    | 0.69 | 2.59E-05 | HLA-DQB1                                    | intronic       |
| 6  | 32505798  | A | G | rs72853909                        | 2.12E-05 | 0.265 | 0.332 | 0.72 | 0.6  | -0.87 | 6.54E-02 | 0.295 | 0.338 | 0.82 | 0.67 | -1    | 0.71 | 2.59E-05 | HLA-DRB5(dist=7792), HLA-DRB6(dist=14692)   | intergenic     |
| 3  | 101613368 | T | C | rs797441579                       | 1.15E-01 | 0.114 | 0.090 | 1.30 | 1    | -1.69 | 4.39E-06 | 0.164 | 0.106 | 1.66 | 1.28 | -2.14 | 1.59 | 2.61E-05 | NFKB1Z(dist=33499), LOC152225(dist=46335)   | intergenic     |
| 14 | 99844373  | A | G | rs6575716                         | 1.70E-05 | 0.125 | 0.189 | 1.63 | 1.28 | -2.07 | 4.73E-01 | 0.184 | 0.175 | 0.95 | 0.74 | -1.2  | 1.60 | 2.62E-05 | BCL11B(dist=106323), SETD3(dist=19710)      | intergenic     |
| 19 | 54923694  | C | T | rs112338949                       | 4.89E-05 | 0.123 | 0.083 | 1.55 | 1.2  | -2.01 | 8.05E-02 | 0.108 | 0.093 | 1.17 | 0.86 | -1.58 | 1.87 | 2.65E-05 | LAIR1(dist=41531), TTYH1(dist=2911)         | intergenic     |
| 3  | 101599433 | C | T | rs12495371                        | 8.30E-02 | 0.106 | 0.082 | 1.32 | 1.01 | -1.73 | 1.22E-05 | 0.150 | 0.097 | 1.65 | 1.26 | -2.15 | 1.62 | 2.69E-05 | NFKB1Z(dist=19564), LOC152225(dist=60270)   | intergenic     |
| 4  | 123857092 | T | G | rs77917118                        | 2.89E-05 | 0.086 | 0.049 | 1.81 | 1.33 | -2.46 | 1.46E-01 | 0.058 | 0.042 | 1.38 | 0.92 | -2.07 | 1.87 | 2.70E-05 | SPATA5                                      | intronic       |
| 18 | 3585353   | T | G | rs115702622                       | 2.43E-05 | 0.060 | 0.038 | 1.59 | 1.11 | -2.27 | 2.21E-01 | 0.026 | 0.033 | 0.81 | 0.45 | -1.44 | 3.80 | 2.73E-05 | DLGAP1                                      | intronic       |
| 1  | 112396411 | G | A | rs1777659                         | 6.24E-02 | 0.125 | 0.101 | 1.28 | 0.99 | -1.64 | 1.82E-05 | 0.187 | 0.126 | 1.59 | 1.25 | -2.03 | 1.54 | 2.74E-05 | KCNND3-IT1                                  | ncRNA_exonic   |
| 6  | 32604898  | G | A | rs9272400                         | 8.37E-06 | 0.542 | 0.458 | 0.71 | 0.61 | -0.84 | 1.00E-01 | 0.451 | 0.494 | 0.84 | 0.7  | -1.02 | 0.74 | 2.79E-05 | HLA-DQA1                                    | upstream       |
| 7  | 153922382 | G | A | rs73487458                        | 5.22E-06 | 0.129 | 0.083 | 1.64 | 1.27 | -2.11 | 3.39E-01 | 0.106 | 0.091 | 1.19 | 0.87 | -1.61 | 1.69 | 2.80E-05 | DPP6                                        | intronic       |
| 6  | 32592200  | T | C | rs9271640                         | 1.56E-05 | 0.412 | 0.334 | 0.72 | 0.61 | -0.85 | 8.11E-02 | 0.3   |       |      |      |       |      |          |                                             |                |

|    |           |   |   |                        |          |       |       |      |      |       |          |       |       |      |      |       |      |          |                                                 |                |
|----|-----------|---|---|------------------------|----------|-------|-------|------|------|-------|----------|-------|-------|------|------|-------|------|----------|-------------------------------------------------|----------------|
| 16 | 58183435  | G | C | rs35682784             | 1.32E-01 | 0.044 | 0.031 | 1.44 | 0.96 | -2.17 | 7.93E-06 | 0.094 | 0.058 | 1.66 | 1.2  | -2.31 | 2.12 | 3.03E-05 | CFAP20(dist=20139), CSNK2A2(dist=8377)          | intergenic     |
| 6  | 32506893  | T | C | rs73395507             | 2.05E-05 | 0.272 | 0.337 | 0.73 | 0.61 | -0.88 | 7.23E-02 | 0.297 | 0.340 | 0.82 | 0.67 | -1.01 | 0.71 | 3.08E-05 | HLA-DRB5(dist=8887), HLA-DRB6(dist=13597)       | intergenic     |
| 7  | 9128646   | T | C | rs35741650             | 4.99E-05 | 0.407 | 0.492 | 1.41 | 1.2  | -1.67 | 9.10E-02 | 0.426 | 0.462 | 1.16 | 0.96 | -1.4  | 1.32 | 3.10E-05 | NXPH1(dist=336053), PER4(dist=545254)           | intergenic     |
| 13 | 105292626 | A | T | rs616846;rs368531243   | 2.71E-05 | 0.212 | 0.170 | 0.76 | 0.62 | -0.93 | 9.98E-01 | 0.166 | 0.161 | 0.96 | 0.75 | -1.24 | 0.55 | 3.13E-05 | LINC01309(dist=1212591), DAOA-AS1(dist=818780)  | intergenic     |
| 3  | 101608358 | T | C | rs74458302             | 5.52E-02 | 0.128 | 0.098 | 1.35 | 1.05 | -1.74 | 3.84E-05 | 0.170 | 0.116 | 1.55 | 1.21 | -2    | 1.55 | 3.13E-05 | NFKBIZ(dist=28489), LOC152225(dist=51345)       | intergenic     |
| 6  | 32481804  | A | T | rs180799257            | 3.72E-05 | 0.360 | 0.299 | 0.76 | 0.64 | -0.9  | 5.00E-02 | 0.299 | 0.260 | 0.82 | 0.67 | -1.01 | 0.69 | 3.14E-05 | HLA-DRA(dist=68978), HLA-DRB5(dist=3350)        | intergenic     |
| 1  | 9333666   | T | C | rs116059626            | 2.34E-05 | 0.042 | 0.022 | 1.91 | 1.23 | -2.95 | 7.63E-01 | 0.020 | 0.020 | 1.00 | 0.52 | -1.95 | 4.60 | 3.16E-05 | H6PD(dist=2272), SPSB1(dist=19275)              | intergenic     |
| 6  | 32592656  | T | C | rs9271664              | 3.20E-05 | 0.411 | 0.333 | 0.71 | 0.6  | -0.84 | 7.87E-02 | 0.360 | 0.312 | 0.81 | 0.66 | -0.98 | 0.74 | 3.19E-05 | HLA-DRB1(dist=35043), HLA-DQA1(dist=12527)      | intergenic     |
| 6  | 32473866  | A | T | rs74696032;rs201832615 | 2.90E-06 | 0.382 | 0.456 | 0.74 | 0.62 | -0.87 | 1.92E-01 | 0.450 | 0.483 | 0.87 | 0.72 | -1.05 | 0.71 | 3.19E-05 | HLA-DRA(dist=61040), HLA-DRB5(dist=11288)       | intergenic     |
| 20 | 8158584   | C | T | rs116731084            | 7.57E-02 | 0.053 | 0.038 | 1.41 | 0.97 | -2.05 | 6.09E-06 | 0.074 | 0.037 | 2.11 | 1.46 | -3.05 | 2.04 | 3.19E-05 | PLCB1                                           | intronic       |
| 7  | 38028548  | C | T | rs10234987             | 3.49E-02 | 0.474 | 0.429 | 1.20 | 1.02 | -1.41 | 5.43E-05 | 0.522 | 0.428 | 1.46 | 1.21 | -1.77 | 1.31 | 3.20E-05 | EPDR1(dist=37006), STARD3NL(dist=189260)        | intergenic     |
| 6  | 32621966  | A | G | rs17613340             | 3.32E-02 | 0.172 | 0.202 | 0.82 | 0.66 | -1.02 | 3.63E-05 | 0.130 | 0.203 | 0.59 | 0.45 | -0.77 | 0.68 | 3.22E-05 | HLA-DQA1(dist=10537), HLA-DQB1(dist=5275)       | intergenic     |
| 7  | 38057364  | G | T | rs9691201              | 4.27E-02 | 0.468 | 0.425 | 1.19 | 1.01 | -1.4  | 3.79E-05 | 0.524 | 0.426 | 1.48 | 1.23 | -1.79 | 1.31 | 3.27E-05 | EPDR1(dist=65822), STARD3NL(dist=160444)        | intergenic     |
| 6  | 32460533  | A | T | rs77089552             | 4.23E-05 | 0.328 | 0.396 | 0.75 | 0.63 | -0.89 | 5.59E-02 | 0.371 | 0.414 | 0.83 | 0.69 | -1.01 | 0.72 | 3.32E-05 | HLA-DRA(dist=47707), HLA-DRB5(dist=24621)       | intergenic     |
| 14 | 107260733 | G | A | rs2105992              | 4.48E-01 | 0.050 | 0.039 | 1.28 | 0.88 | -1.88 | 1.02E-08 | 0.094 | 0.058 | 1.69 | 1.22 | -2.34 | 2.31 | 3.35E-05 | MIR5195(dist=1519), NONE(dist=NONE)             | intergenic     |
| 2  | 220920352 | A | G | rs73078867             | 3.90E-02 | 0.063 | 0.051 | 1.26 | 0.89 | -1.77 | 5.88E-05 | 0.080 | 0.044 | 1.90 | 1.33 | -2.71 | 2.01 | 3.36E-05 | MIR4268(dist=149066), EPHA4(dist=1362395)       | intergenic     |
| 3  | 132919822 | A | G | rs79707476             | 6.64E-06 | 0.079 | 0.043 | 1.89 | 1.37 | -2.61 | 3.27E-01 | 0.051 | 0.039 | 1.33 | 0.87 | -2.05 | 1.92 | 3.42E-05 | TMEM108                                         | intronic       |
| 6  | 32546914  | C | T | rs181125806            | 4.48E-05 | 0.072 | 0.113 | 0.61 | 0.45 | -0.83 | 4.68E-02 | 0.101 | 0.130 | 0.75 | 0.55 | -1.02 | 0.59 | 3.43E-05 | HLA-DRB1                                        | intronic       |
| 6  | 32546761  | G | A | rs113734598            | 6.18E-05 | 0.065 | 0.101 | 0.62 | 0.45 | -0.85 | 3.50E-02 | 0.096 | 0.127 | 0.73 | 0.54 | -1.01 | 0.58 | 3.43E-05 | HLA-DRB1                                        | UTR3           |
| 3  | 132932731 | T | C | rs77383862             | 7.79E-06 | 0.079 | 0.044 | 1.87 | 1.35 | -2.57 | 3.10E-01 | 0.051 | 0.039 | 1.34 | 0.87 | -2.05 | 1.92 | 3.47E-05 | TMEM108                                         | intronic       |
| 6  | 32455235  | G | C | rs113081153            | 1.31E-06 | 0.343 | 0.419 | 0.73 | 0.61 | -0.86 | 2.98E-01 | 0.366 | 0.396 | 0.88 | 0.72 | -1.07 | 0.71 | 3.47E-05 | HLA-DRA(dist=42409), HLA-DRB5(dist=29919)       | intergenic     |
| 1  | 112391401 | C | T | rs580183               | 5.69E-02 | 0.127 | 0.102 | 1.29 | 1    | -1.65 | 3.31E-05 | 0.185 | 0.125 | 1.58 | 1.24 | -2.02 | 1.53 | 3.49E-05 | KCND3                                           | intronic       |
| 6  | 32478208  | A | T | rs193065325            | 5.26E-07 | 0.430 | 0.508 | 0.73 | 0.62 | -0.86 | 3.45E-01 | 0.516 | 0.492 | 0.91 | 0.75 | -1.09 | 0.70 | 3.53E-05 | HLA-DRA(dist=65382), HLA-DRB5(dist=6946)        | intergenic     |
| 3  | 132922820 | G | A | rs116318124            | 6.77E-06 | 0.079 | 0.043 | 1.89 | 1.36 | -2.6  | 3.30E-01 | 0.051 | 0.039 | 1.33 | 0.86 | -2.05 | 1.92 | 3.53E-05 | TMEM108                                         | intronic       |
| 2  | 240476495 | G | A | rs79447370             | 3.19E-05 | 0.106 | 0.071 | 1.55 | 1.18 | -2.04 | 4.35E-01 | 0.060 | 0.054 | 1.11 | 0.75 | -1.65 | 2.26 | 3.55E-05 | HDAC4(dist=153852), LOC150935(dist=208059)      | intergenic     |
| 4  | 8214636   | T | C | rs1712287              | 3.61E-05 | 0.304 | 0.253 | 0.77 | 0.65 | -0.93 | 2.62E-03 | 0.241 | 0.207 | 0.82 | 0.66 | -1.03 | 0.61 | 3.56E-05 | SH3TC1                                          | intronic       |
| 6  | 32487474  | G | A | rs189049184            | 1.47E-05 | 0.345 | 0.281 | 0.74 | 0.62 | -0.88 | 8.51E-02 | 0.263 | 0.230 | 0.84 | 0.68 | -1.04 | 0.68 | 3.57E-05 | HLA-DRB5                                        | intronic       |
| 1  | 117122887 | T | C | rs2284860              | 1.08E-05 | 0.085 | 0.045 | 1.99 | 1.45 | -2.72 | 9.54E-02 | 0.103 | 0.089 | 1.18 | 0.87 | -1.61 | 1.89 | 3.57E-05 | IGSF3                                           | intronic       |
| 10 | 61801020  | T | C | rs2393576              | 7.49E-06 | 0.159 | 0.095 | 1.80 | 1.43 | -2.28 | 1.83E-01 | 0.151 | 0.138 | 1.11 | 0.86 | -1.45 | 1.57 | 3.57E-05 | ANK3                                            | intronic       |
| 6  | 32629227  | C | T | rs9273660              | 4.81E-05 | 0.118 | 0.177 | 0.62 | 0.49 | -0.79 | 5.66E-02 | 0.132 | 0.166 | 0.76 | 0.58 | -1    | 0.68 | 3.58E-05 | HLA-DQB1                                        | exonic         |
| 20 | 9729000   | G | A | rs139913197            | 3.35E-02 | 0.063 | 0.051 | 1.23 | 0.88 | -1.74 | 6.26E-05 | 0.071 | 0.041 | 1.77 | 1.22 | -2.57 | 2.35 | 3.58E-05 | PAK7                                            | intronic       |
| 6  | 32499244  | C | A | rs138961230            | 1.02E-05 | 0.312 | 0.384 | 0.73 | 0.61 | -0.86 | 1.23E-01 | 0.357 | 0.395 | 0.85 | 0.7  | -1.03 | 0.72 | 3.59E-05 | HLA-DRB5(dist=1238), HLA-DRB6(dist=21246)       | intergenic     |
| 6  | 32641247  | A | T | rs9274904              | 4.27E-02 | 0.138 | 0.163 | 0.82 | 0.65 | -1.04 | 2.96E-05 | 0.098 | 0.163 | 0.56 | 0.41 | -0.76 | 0.65 | 3.59E-05 | HLA-DQB1(dist=6781), HLA-DQA2(dist=67916)       | intergenic     |
| 1  | 6489576   | C | T | rs4071579              | 4.77E-06 | 0.542 | 0.440 | 0.66 | 0.56 | -0.78 | 2.82E-01 | 0.487 | 0.490 | 0.99 | 0.82 | -1.19 | 0.75 | 3.59E-05 | ESPN                                            | intronic       |
| 3  | 132924938 | A | G | rs115580783            | 6.84E-06 | 0.079 | 0.043 | 1.88 | 1.36 | -2.6  | 3.32E-01 | 0.051 | 0.039 | 1.33 | 0.86 | -2.04 | 1.92 | 3.62E-05 | TMEM108                                         | intronic       |
| 6  | 32480196  | A | T | rs116019661            | 2.37E-05 | 0.163 | 0.216 | 0.71 | 0.57 | -0.88 | 8.71E-02 | 0.162 | 0.192 | 0.81 | 0.63 | -1.05 | 0.65 | 3.62E-05 | HLA-DRA(dist=67370), HLA-DRB5(dist=4958)        | intergenic     |
| 3  | 132925052 | A | G | rs150671281            | 6.85E-06 | 0.079 | 0.043 | 1.88 | 1.36 | -2.6  | 3.32E-01 | 0.051 | 0.039 | 1.33 | 0.86 | -2.04 | 1.92 | 3.63E-05 | TMEM108                                         | intronic       |
| 6  | 32473832  | C | T | rs77932560             | 1.20E-05 | 0.297 | 0.365 | 0.73 | 0.61 | -0.87 | 1.19E-01 | 0.373 | 0.414 | 0.84 | 0.69 | -1.02 | 0.71 | 3.63E-05 | HLA-DRA(dist=61006), HLA-DRB5(dist=11322)       | intergenic     |
| 1  | 185428796 | T | C | rs80323592             | 2.72E-05 | 0.076 | 0.052 | 1.50 | 1.09 | -2.06 | 4.15E-01 | 0.069 | 0.060 | 1.15 | 0.8  | -1.67 | 3.25 | 3.65E-05 | GS1-279B7.1(dist=124625), LINC01350(dist=98716) | intergenic     |
| 3  | 132928096 | A | G | rs74393908             | 6.93E-06 | 0.079 | 0.043 | 1.88 | 1.36 | -2.6  | 3.33E-01 | 0.051 | 0.039 | 1.33 | 0.86 | -2.04 | 1.92 | 3.68E-05 | TMEM108                                         | intronic       |
| 6  | 32456203  | C | A | rs79941351             | 1.31E-05 | 0.339 | 0.405 | 0.76 | 0.64 | -0.9  | 1.02E-01 | 0.378 | 0.416 | 0.85 | 0.7  | -1.03 | 0.71 | 3.71E-05 | HLA-DRA(dist=43377), HLA-DRB5(dist=28951)       | intergenic     |
| 3  | 132932797 | C | G | rs80107304             | 7.00E-06 | 0.079 | 0.043 | 1.88 | 1.36 | -2.6  | 3.34E-01 | 0.051 | 0.039 | 1.33 | 0.86 | -2.04 | 1.91 | 3.74E-05 | TMEM108                                         | intronic       |
| 1  | 112397189 | G | A | rs650029               | 7.43E-02 | 0.124 | 0.101 | 1.26 | 0.98 | -1.63 | 2.03E-05 | 0.187 | 0.127 | 1.58 | 1.24 | -2.02 | 1.53 | 3.75E-05 | KCND3-IT1                                       | ncRNA_intronic |
| 6  | 32473216  | G | A | rs115667641            | 2.58E-05 | 0.326 | 0.393 | 0.75 | 0.63 | -0.89 | 7.53E-02 | 0.391 | 0.430 | 0.85 | 0.7  | -1.03 | 0.71 | 3.75E-05 | HLA-DRA(dist=60390), HLA-DRB5(dist=11938)       | intergenic     |
| 3  | 132935561 | A | T | rs78667561             | 7.03E-06 | 0.079 | 0.043 | 1.88 | 1.36 | -2.6  | 3.35E-01 | 0.051 | 0.039 | 1.33 | 0.86 | -2.04 | 1.91 | 3.76E-05 | TMEM108                                         | intronic       |
| 7  | 38032328  | G | T | rs1376262              | 4.09E-02 | 0.500 | 0.453 | 1.21 | 1.03 | -1.42 | 4.46E-05 | 0.574 | 0.480 | 1.46 | 1.21 | -1.76 | 1.30 | 3.77E-05 | EPDR1(dist=40786), STARD3NL(dist=185480)        | intergenic     |
| 3  | 132947840 | G | C | rs4293703              | 7.03E-06 | 0.079 | 0.043 | 1.88 | 1.36 | -2.6  | 3.36E-01 | 0.051 | 0.039 | 1.33 | 0.86 | -2.04 | 1.91 | 3.78E-05 | TMEM108                                         | intronic       |
| 3  | 132943566 | G | A | rs57191086             | 7.04E-06 | 0.079 | 0.043 | 1.88 | 1.36 | -2.6  | 3.36E-01 | 0.051 | 0.039 | 1.33 | 0.86 | -2.04 | 1.91 | 3.79E-05 | TMEM108                                         | intronic       |
| 6  | 32469491  | T | G | rs75238419             | 3.73E-05 | 0.277 | 0.341 | 0.74 | 0.62 | -0.89 | 6.10E-02 | 0.315 | 0.360 | 0.82 | 0.67 | -1    | 0.72 | 3.80E-05 | HLA-DRA(dist=56665), HLA-DRB5(dist=15663)       | intergenic     |
| 6  | 32478205  | G | A | rs189778682            | 1.50E-07 | 0.361 | 0.441 | 0.71 | 0.6  | -0.85 | 5.10E-01 | 0.415 | 0.434 | 0.93 | 0.77 | -1.12 | 0.70 | 3.86E-05 | HLA-DRA(dist=65379), HLA-DRB5(dist=6949)        | intergenic     |
| 6  | 32594248  | G | A | rs9271770              | 7.31E-06 | 0.417 | 0.334 | 0.70 | 0.59 | -0.83 | 1.50E-01 | 0.362 | 0.320 | 0.83 | 0.68 | -1.01 | 0.75 | 3.93E-05 | HLA-DRB1(dist=36635), HLA-DQA1(dist=10935)      | intergenic     |
| 6  | 32594275  | G | A | rs9271772              | 6.09E-06 | 0.426 | 0.343 | 0.70 | 0.6  | -0.83 | 1.59E-01 | 0.363 | 0.322 | 0.83 | 0.68 | -1.01 | 0.75 | 3.94E-05 | HLA-DRB1(dist=36662), HLA-DQA1(dist=10908)      | intergenic     |
| 6  | 42085225  | C | T | rs4579355              | 2.87E-05 | 0.332 | 0.409 | 1.39 | 1.17 | -1.65 | 7.91E-02 | 0.351 | 0.397 | 1.22 | 1    | -1.48 | 1.33 | 3.94E-05 | C6orf132                                        | intronic       |
| 6  | 32473259  | G | C | rs140656634            | 2.94E-05 | 0.305 | 0.371 | 0.74 | 0.62 | -0.89 | 7.62E-02 | 0.358 | 0.398 | 0.84 | 0.69 | -1.02 | 0.72 | 3.95E-05 | HLA-DRA(dist=60433), HLA-DRB5(dist=11895)       | intergenic     |
| 6  | 32482971  | C | T | rs183924027            | 5.87E-06 | 0.337 | 0.411 | 0.73 | 0.61 | -0.86 | 1.86E-01 | 0.420 | 0.449 | 0.89 | 0.74 | -1.07 | 0.71 | 3.96E-05 | HLA-DRA(dist=70145), HLA-DRB5(dist=2183)        | intergenic     |
| 17 | 40494457  | C | T | rs17879513             | 5.33E-02 | 0.084 | 0.066 | 1.30 | 0.96 | -1.75 | 2.39E-05 | 0.099 | 0.051 | 2.04 | 1.47 | -2.81 | 1.72 | 4.00E-05 | STAT3                                           | intronic       |
| 1  | 108230399 | C | T | rs2494055              | 3.39E-05 | 0.127 | 0.077 | 0.58 | 0.45 | -0.75 | 1.27E-01 | 0.126 | 0.10  |      |      |       |      |          |                                                 |                |

|    |           |   |   |                                    |          |       |       |      |      |       |          |       |       |      |      |       |      |          |                                                |                |
|----|-----------|---|---|------------------------------------|----------|-------|-------|------|------|-------|----------|-------|-------|------|------|-------|------|----------|------------------------------------------------|----------------|
| 6  | 32415109  | T | G | rs3135387                          | 4.35E-05 | 0.384 | 0.306 | 0.71 | 0.6  | -0.84 | 6.70E-02 | 0.350 | 0.304 | 0.81 | 0.67 | -0.99 | 0.75 | 4.43E-05 | HLA-DRA(dist=2283), HLA-DRB5(dist=70045)       | intergenic     |
| 6  | 32472509  | C | T | rs79217712                         | 1.83E-05 | 0.133 | 0.186 | 0.67 | 0.53 | -0.85 | 7.83E-03 | 0.107 | 0.142 | 0.72 | 0.54 | -0.98 | 0.57 | 4.43E-05 | HLA-DRA(dist=59683), HLA-DRB5(dist=12645)      | intergenic     |
| 17 | 40488661  | C | A | rs17879198                         | 5.94E-02 | 0.083 | 0.066 | 1.29 | 0.95 | -1.74 | 2.19E-05 | 0.099 | 0.051 | 2.04 | 1.48 | -2.81 | 1.71 | 4.43E-05 | STAT3                                          | intronic       |
| 3  | 110234146 | G | A | rs9857432                          | 5.62E-07 | 0.161 | 0.104 | 0.61 | 0.48 | -0.76 | 6.56E-01 | 0.127 | 0.111 | 0.86 | 0.65 | -1.14 | 0.66 | 4.48E-05 | MIR4445(dist=912402), PVRL3-AS1(dist=530017)   | intergenic     |
| 6  | 32468939  | G | A | rs142281463;rs200878174;rs72849269 | 1.01E-05 | 0.214 | 0.279 | 0.71 | 0.58 | -0.86 | 1.35E-01 | 0.267 | 0.302 | 0.84 | 0.68 | -1.04 | 0.71 | 4.56E-05 | HLA-DRA(dist=56113), HLA-DRB5(dist=16215)      | intergenic     |
| 3  | 175388271 | T | C | rs186798753                        | 4.41E-05 | 0.071 | 0.048 | 1.52 | 1.09 | -2.11 | 6.82E-01 | 0.050 | 0.051 | 0.97 | 0.63 | -1.48 | 3.20 | 4.60E-05 | NAALADL2                                       | intronic       |
| 19 | 55152023  | T | C | rs8110640                          | 9.53E-02 | 0.097 | 0.081 | 1.21 | 0.92 | -1.6  | 1.71E-05 | 0.138 | 0.081 | 1.81 | 1.38 | -2.39 | 1.61 | 4.62E-05 | LILRB1(dist=3042), MIR8061(dist=4737)          | intergenic     |
| 16 | 76941941  | G | A | rs11865227                         | 4.96E-06 | 0.131 | 0.082 | 1.69 | 1.32 | -2.18 | 3.61E-01 | 0.095 | 0.081 | 1.19 | 0.87 | -1.65 | 1.61 | 4.69E-05 | MIR4719(dist=39025), MON1B(dist=282875)        | intergenic     |
| 6  | 32479953  | G | T | rs74323872                         | 2.31E-05 | 0.169 | 0.225 | 0.70 | 0.57 | -0.87 | 9.52E-02 | 0.215 | 0.247 | 0.83 | 0.67 | -1.05 | 0.68 | 4.72E-05 | HLA-DRA(dist=67127), HLA-DRB5(dist=5201)       | intergenic     |
| 2  | 211760191 | G | A | rs114352098                        | 1.94E-05 | 0.042 | 0.022 | 1.97 | 1.27 | -3.06 | 1.90E-01 | 0.031 | 0.024 | 1.32 | 0.77 | -2.28 | 3.04 | 4.72E-05 | CPS1(dist=216359), ERBB4(dist=480251)          | intergenic     |
| 21 | 24274393  | T | C | rs62209430                         | 6.00E-02 | 0.031 | 0.021 | 1.52 | 0.93 | -2.48 | 3.84E-05 | 0.047 | 0.030 | 1.61 | 1.03 | -2.53 | 3.27 | 4.75E-05 | LINC00308(dist=785546), D21S2088E(dist=459033) | intergenic     |
| 11 | 71291780  | C | T | rs181728195                        | 4.08E-05 | 0.053 | 0.032 | 1.68 | 1.15 | -2.47 | 1.54E-01 | 0.037 | 0.025 | 1.46 | 0.88 | -2.42 | 2.66 | 4.76E-05 | KRTAP5-10(dist=14114), KRTAP5-11(dist=1121)    | intergenic     |
| 6  | 32473388  | C | T | rs111863034                        | 2.12E-05 | 0.444 | 0.375 | 0.75 | 0.64 | -0.89 | 1.00E-01 | 0.379 | 0.346 | 0.87 | 0.72 | -1.05 | 0.71 | 4.80E-05 | HLA-DRA(dist=60562), HLA-DRB5(dist=11766)      | intergenic     |
| 17 | 36433478  | G | A | rs73984496                         | 6.09E-05 | 0.055 | 0.032 | 1.76 | 1.2  | -2.57 | 6.34E-01 | 0.026 | 0.023 | 1.14 | 0.63 | -2.04 | 3.14 | 4.83E-05 | LOC440434(dist=20222), MRPL45(dist=19511)      | intergenic     |
| 12 | 124729368 | C | T | rs144968720                        | 5.24E-05 | 0.063 | 0.036 | 1.80 | 1.26 | -2.57 | 8.26E-02 | 0.037 | 0.047 | 0.77 | 0.47 | -1.26 | 2.82 | 4.91E-05 | ZNF664-FAM101A                                 | intronic       |
| 12 | 59987096  | T | C | rs7975879                          | 4.86E-02 | 0.056 | 0.042 | 1.35 | 0.94 | -1.94 | 4.81E-05 | 0.074 | 0.036 | 2.12 | 1.46 | -3.06 | 1.97 | 4.91E-05 | LRI3(dist=672777), SLC16A7(dist=2725)          | intergenic     |
| 6  | 32473889  | C | T | rs79747029                         | 3.32E-06 | 0.387 | 0.460 | 0.74 | 0.63 | -0.88 | 2.35E-01 | 0.460 | 0.491 | 0.88 | 0.73 | -1.06 | 0.72 | 4.94E-05 | HLA-DRA(dist=61063), HLA-DRB5(dist=11265)      | intergenic     |
| 17 | 40513631  | C | T | rs75059447                         | 6.74E-02 | 0.086 | 0.069 | 1.26 | 0.94 | -1.7  | 2.21E-05 | 0.100 | 0.052 | 2.04 | 1.48 | -2.82 | 1.70 | 4.95E-05 | STAT3                                          | intronic       |
| 13 | 48047693  | G | A | rs12017688                         | 5.63E-05 | 0.048 | 0.100 | 0.45 | 0.32 | -0.65 | 1.27E-01 | 0.070 | 0.083 | 0.83 | 0.58 | -1.2  | 0.61 | 4.98E-05 | HTR2A(dist=576482), LINC00562(dist=456595)     | intergenic     |
| 6  | 32635629  | G | A | rs114544105                        | 3.54E-05 | 0.118 | 0.181 | 0.61 | 0.47 | -0.77 | 8.03E-02 | 0.144 | 0.178 | 0.77 | 0.59 | -1.01 | 0.70 | 5.01E-05 | HLA-DQB1(dist=1163), HLA-DQA2(dist=73534)      | intergenic     |
| 9  | 76442516  | G | A | rs138625309                        | 3.43E-06 | 0.046 | 0.023 | 2.00 | 1.31 | -3.05 | 2.68E-01 | 0.032 | 0.024 | 1.34 | 0.78 | -2.29 | 2.75 | 5.07E-05 | MIR6130                                        | ncRNA_intronic |
| 3  | 187593338 | T | C | rs9836426                          | 1.15E-01 | 0.499 | 0.453 | 0.83 | 0.71 | -0.98 | 1.04E-05 | 0.574 | 0.486 | 0.70 | 0.58 | -0.85 | 0.77 | 5.18E-05 | BCL6(dist=129825), LPP-AS2(dist=275656)        | intergenic     |
| 6  | 32635998  | G | T | rs9274623                          | 3.69E-05 | 0.117 | 0.180 | 0.61 | 0.47 | -0.77 | 7.98E-02 | 0.144 | 0.179 | 0.77 | 0.59 | -1    | 0.70 | 5.19E-05 | HLA-DQB1(dist=1532), HLA-DQA2(dist=73165)      | intergenic     |
| 6  | 32499256  | C | T | rs79556527                         | 2.28E-05 | 0.298 | 0.367 | 0.73 | 0.61 | -0.87 | 1.16E-01 | 0.328 | 0.366 | 0.85 | 0.69 | -1.03 | 0.72 | 5.20E-05 | HLA-DRB5(dist=1250), HLA-DRB6(dist=21234)      | intergenic     |
| 1  | 152925755 | A | C | rs7556517                          | 1.08E-06 | 0.292 | 0.204 | 0.62 | 0.52 | -0.75 | 4.87E-01 | 0.243 | 0.235 | 0.96 | 0.77 | -1.19 | 0.73 | 5.25E-05 | IVL(dist=41393), SPRR4(dist=17374)             | intergenic     |
| 7  | 1306102   | T | C | rs62436676                         | 5.78E-05 | 0.215 | 0.278 | 0.71 | 0.59 | -0.86 | 7.50E-01 | 0.253 | 0.254 | 0.99 | 0.8  | -1.23 | 0.62 | 5.30E-05 | UNCX(dist=29489), MICALL2(dist=167893)         | intergenic     |
| 16 | 76938518  | A | G | rs9938603                          | 9.53E-06 | 0.119 | 0.074 | 1.68 | 1.29 | -2.19 | 3.07E-01 | 0.087 | 0.072 | 1.22 | 0.87 | -1.71 | 1.66 | 5.30E-05 | MIR4719(dist=35602), MON1B(dist=286298)        | intergenic     |
| 6  | 32456335  | A | G | rs77512426                         | 1.35E-05 | 0.386 | 0.457 | 0.75 | 0.63 | -0.88 | 1.39E-01 | 0.464 | 0.498 | 0.82 | 0.72 | -1.05 | 0.72 | 5.31E-05 | HLA-DRA(dist=43509), HLA-DRB5(dist=28819)      | intergenic     |
| 7  | 153914346 | T | C | rs10258384                         | 1.61E-05 | 0.151 | 0.101 | 1.58 | 1.25 | -2.01 | 3.39E-01 | 0.112 | 0.095 | 1.19 | 0.88 | -1.61 | 1.58 | 5.31E-05 | DPP6                                           | intronic       |
| 6  | 32502416  | C | T | rs75969927                         | 1.05E-05 | 0.231 | 0.296 | 0.71 | 0.59 | -0.86 | 1.44E-01 | 0.271 | 0.308 | 0.84 | 0.68 | -1.03 | 0.72 | 5.33E-05 | HLA-DRB5(dist=4410), HLA-DRB6(dist=18074)      | intergenic     |
| 13 | 48049260  | G | A | rs59167701                         | 5.77E-05 | 0.048 | 0.100 | 0.45 | 0.32 | -0.65 | 1.33E-01 | 0.069 | 0.082 | 0.83 | 0.58 | -1.2  | 0.62 | 5.36E-05 | HTR2A(dist=578049), LINC00562(dist=455028)     | intergenic     |
| 20 | 54798600  | C | T | rs2148213                          | 1.28E-01 | 0.030 | 0.023 | 1.32 | 0.81 | -2.16 | 5.81E-05 | 0.043 | 0.024 | 1.80 | 1.12 | -2.89 | 6.55 | 5.40E-05 | CBLN4(dist=218072), MC3R(dist=25188)           | intergenic     |
| 3  | 110248552 | A | G | rs6437921                          | 3.74E-07 | 0.168 | 0.110 | 0.61 | 0.49 | -0.76 | 7.82E-01 | 0.130 | 0.116 | 0.88 | 0.67 | -1.17 | 0.66 | 5.43E-05 | MIR4445(dist=926808), PVRL3-AS1(dist=515611)   | intergenic     |
| 16 | 58185794  | G | A | rs12927339                         | 1.91E-01 | 0.038 | 0.026 | 1.47 | 0.95 | -2.29 | 7.58E-06 | 0.088 | 0.054 | 1.71 | 1.22 | -2.39 | 2.09 | 5.47E-05 | CFAP20(dist=22498), CSNK2A2(dist=6018)         | intergenic     |
| 2  | 240457338 | C | A | rs116621317                        | 4.95E-05 | 0.083 | 0.054 | 1.59 | 1.16 | -2.16 | 9.87E-01 | 0.046 | 0.045 | 1.04 | 0.66 | -1.62 | 2.51 | 5.48E-05 | HDAC4(dist=134695), LOC150935(dist=227216)     | intergenic     |
| 3  | 101630232 | G | A | rs10936622                         | 1.74E-01 | 0.099 | 0.079 | 1.29 | 0.97 | -1.7  | 5.68E-06 | 0.147 | 0.092 | 1.70 | 1.3  | -2.23 | 1.60 | 5.50E-05 | NFKB1Z(dist=50363), LOC152225(dist=29471)      | intergenic     |
| 13 | 48047714  | G | A | rs12017693                         | 5.89E-05 | 0.048 | 0.100 | 0.45 | 0.32 | -0.65 | 1.34E-01 | 0.069 | 0.082 | 0.83 | 0.58 | -1.2  | 0.62 | 5.53E-05 | HTR2A(dist=576503), LINC00562(dist=456574)     | intergenic     |
| 6  | 32502610  | C | T | rs75252378                         | 1.35E-05 | 0.235 | 0.301 | 0.71 | 0.59 | -0.86 | 1.43E-01 | 0.260 | 0.296 | 0.84 | 0.68 | -1.04 | 0.72 | 5.54E-05 | HLA-DRB5(dist=4604), HLA-DRB6(dist=17880)      | intergenic     |
| 6  | 32456366  | G | C | rs76398050                         | 5.29E-05 | 0.391 | 0.454 | 0.77 | 0.65 | -0.91 | 6.66E-02 | 0.457 | 0.498 | 0.85 | 0.7  | -1.02 | 0.72 | 5.54E-05 | HLA-DRA(dist=43540), HLA-DRB5(dist=28788)      | intergenic     |
| 11 | 17336343  | T | A | rs72863680                         | 5.07E-01 | 0.027 | 0.021 | 1.26 | 0.75 | -2.11 | 4.12E-08 | 0.077 | 0.042 | 1.89 | 1.32 | -2.71 | 2.41 | 5.55E-05 | NUCB2                                          | intronic       |
| 11 | 17373421  | T | C | rs72863682                         | 5.09E-01 | 0.027 | 0.021 | 1.26 | 0.75 | -2.11 | 4.10E-08 | 0.077 | 0.042 | 1.89 | 1.32 | -2.71 | 2.41 | 5.63E-05 | NUCB2                                          | intronic       |
| 11 | 68059202  | A | G | rs10791972                         | 9.36E-02 | 0.181 | 0.151 | 1.25 | 1.01 | -1.55 | 3.67E-05 | 0.234 | 0.170 | 1.49 | 1.19 | -1.87 | 1.43 | 5.66E-05 | C11orf24(dist=19733), LRP5(dist=20875)         | intergenic     |
| 19 | 52490280  | G | C | rs17695912                         | 2.90E-01 | 0.043 | 0.033 | 1.31 | 0.86 | -1.98 | 1.57E-07 | 0.071 | 0.033 | 2.20 | 1.51 | -3.21 | 2.15 | 5.66E-05 | ZNF350                                         | upstream       |
| 6  | 32473304  | C | T | rs113002353                        | 1.60E-05 | 0.257 | 0.325 | 0.72 | 0.6  | -0.86 | 1.32E-01 | 0.302 | 0.339 | 0.84 | 0.69 | -1.03 | 0.72 | 5.67E-05 | HLA-DRA(dist=60478), HLA-DRB5(dist=11850)      | intergenic     |
| 4  | 8214051   | A | G | rs1678289                          | 5.75E-05 | 0.306 | 0.245 | 0.74 | 0.62 | -0.88 | 2.91E-03 | 0.241 | 0.208 | 0.82 | 0.66 | -1.03 | 0.66 | 5.67E-05 | SH3TC1                                         | intronic       |
| 6  | 32473104  | T | C | rs116758859                        | 8.13E-06 | 0.337 | 0.407 | 0.74 | 0.62 | -0.88 | 1.76E-01 | 0.411 | 0.446 | 0.87 | 0.72 | -1.05 | 0.72 | 5.75E-05 | HLA-DRA(dist=60278), HLA-DRB5(dist=12050)      | intergenic     |
| 6  | 32570880  | C | T | rs556025                           | 5.08E-05 | 0.189 | 0.260 | 0.67 | 0.54 | -0.82 | 8.21E-02 | 0.215 | 0.252 | 0.81 | 0.65 | -1.02 | 0.73 | 5.76E-05 | HLA-DRB1(dist=13267), HLA-DQA1(dist=34303)     | intergenic     |
| 16 | 76986308  | T | C | rs16944988                         | 5.62E-06 | 0.134 | 0.085 | 1.67 | 1.3  | -2.14 | 3.96E-01 | 0.096 | 0.082 | 1.18 | 0.86 | -1.62 | 1.60 | 5.76E-05 | MIR4719(dist=83392), MON1B(dist=238508)        | intergenic     |
| 16 | 76983571  | C | T | rs9935586                          | 5.69E-06 | 0.134 | 0.085 | 1.67 | 1.3  | -2.15 | 3.97E-01 | 0.095 | 0.082 | 1.18 | 0.86 | -1.63 | 1.60 | 5.78E-05 | MIR4719(dist=80655), MON1B(dist=241245)        | intergenic     |
| 6  | 32473694  | A | G | rs60993360                         | 6.46E-05 | 0.293 | 0.355 | 0.75 | 0.63 | -0.9  | 6.59E-02 | 0.327 | 0.370 | 0.83 | 0.68 | -1.01 | 0.72 | 5.78E-05 | HLA-DRA(dist=60868), HLA-DRB5(dist=11460)      | intergenic     |
| 4  | 179372662 | C | A | rs2702378                          | 5.86E-05 | 0.073 | 0.044 | 1.72 | 1.23 | -2.39 | 4.77E-01 | 0.041 | 0.039 | 1.05 | 0.66 | -1.69 | 2.79 | 5.78E-05 | LINC01098(dist=460758), NONE(dist=NONE)        | intergenic     |
| 16 | 76983861  | C | T | rs9935852                          | 5.69E-06 | 0.134 | 0.085 | 1.67 | 1.3  | -2.15 | 3.97E-01 | 0.095 | 0.082 | 1.18 | 0.86 | -1.62 | 1.60 | 5.80E-05 | MIR4719(dist=80945), MON1B(dist=240955)        | intergenic     |
| 16 | 76983046  | C | G | rs75527685                         | 5.76E-06 | 0.134 | 0.085 | 1.67 | 1.3  | -2.15 | 3.97E-01 | 0.095 | 0.082 | 1.18 | 0.86 | -1.63 | 1.60 | 5.82E-05 | MIR4719(dist=80130), MON1B(dist=241770)        | intergenic     |
| 3  | 110264230 | A | G | rs9819275                          | 9.07E-06 | 0.254 | 0.193 | 0.70 | 0.58 | -0.85 | 3.33E-01 | 0.211 | 0.181 | 0.82 | 0.66 | -1.04 | 0.72 | 5.84E-05 | MIR4445(dist=942486), PVRL3-AS1(dist=499933)   | intergenic     |
| 13 | 48042203  | G | A | rs9591061                          | 6.12E-05 | 0.048 | 0.100 | 0.45 | 0.32 | -0.65 | 1.37E-01 | 0.070 | 0.082 | 0.84 | 0.58 | -1.2  | 0.62 | 5.86E-05 | HTR2A(dist=570992), LINC00562(dist=462085)     | intergenic     |
| 15 | 91720393  | G | T | rs191539142                        | 6        |       |       |      |      |       |          |       |       |      |      |       |      |          |                                                |                |

|    |           |   |   |                        |          |       |       |      |      |       |          |       |       |      |      |       |      |          |                                                     |            |
|----|-----------|---|---|------------------------|----------|-------|-------|------|------|-------|----------|-------|-------|------|------|-------|------|----------|-----------------------------------------------------|------------|
| 10 | 119120241 | G | A | rs4465301              | 9.78E-06 | 0.087 | 0.048 | 1.87 | 1.37 | -2.54 | 3.08E-01 | 0.059 | 0.050 | 1.19 | 0.8  | -1.78 | 1.85 | 6.21E-05 | PDZD8                                               | intronic   |
| 4  | 8215225   | C | T | rs1678290;rs71635963   | 6.36E-05 | 0.478 | 0.418 | 0.78 | 0.66 | -0.92 | 3.13E-02 | 0.433 | 0.403 | 0.88 | 0.73 | -1.07 | 0.66 | 6.28E-05 | SH3TC1                                              | intronic   |
| 18 | 50637015  | A | G | rs112856944            | 6.78E-02 | 0.054 | 0.042 | 1.31 | 0.9  | -1.89 | 3.24E-05 | 0.073 | 0.037 | 2.06 | 1.43 | -2.99 | 1.98 | 6.29E-05 | DCC                                                 | intronic   |
| 6  | 32487458  | C | G | rs114645980            | 5.97E-05 | 0.352 | 0.291 | 0.75 | 0.64 | -0.9  | 6.40E-02 | 0.275 | 0.239 | 0.83 | 0.67 | -1.02 | 0.70 | 6.30E-05 | HLA-DRB5                                            | intronic   |
| 6  | 32592143  | A | G | rs9271639              | 2.90E-05 | 0.417 | 0.342 | 0.73 | 0.62 | -0.86 | 1.09E-01 | 0.363 | 0.318 | 0.82 | 0.67 | -1    | 0.75 | 6.32E-05 | HLA-DRB1(dist=34530), HLA-DQA1(dist=13040)          | intronic   |
| 1  | 108225778 | G | C | rs2504457              | 5.81E-05 | 0.121 | 0.074 | 0.58 | 0.45 | -0.75 | 1.29E-01 | 0.120 | 0.102 | 0.83 | 0.62 | -1.11 | 0.63 | 6.37E-05 | VAIV3                                               | intronic   |
| 4  | 161205022 | A | G | rs116556973            | 1.70E-01 | 0.043 | 0.035 | 1.25 | 0.83 | -1.87 | 4.34E-06 | 0.067 | 0.030 | 2.27 | 1.54 | -3.35 | 2.20 | 6.42E-05 | RAPGEF2(dist=923721), FSTL5(dist=1100022)           | intergenic |
| 19 | 55151740  | C | T | rs35843708             | 1.30E-01 | 0.093 | 0.080 | 1.19 | 0.89 | -1.58 | 1.39E-05 | 0.137 | 0.081 | 1.80 | 1.36 | -2.37 | 1.62 | 6.44E-05 | LILRB1(dist=2759), MIR8061(dist=5202)               | intergenic |
| 6  | 32499214  | A | G | rs78247055             | 1.77E-05 | 0.266 | 0.335 | 0.72 | 0.6  | -0.86 | 1.42E-01 | 0.298 | 0.334 | 0.84 | 0.69 | -1.03 | 0.73 | 6.51E-05 | HLA-DRB5(dist=1208), HLA-DRB6(dist=21276)           | intergenic |
| 20 | 8206437   | A | G | rs6055668              | 1.40E-01 | 0.045 | 0.034 | 1.35 | 0.9  | -2.02 | 7.23E-06 | 0.070 | 0.033 | 2.19 | 1.5  | -3.21 | 2.07 | 6.56E-05 | PLCB1                                               | intronic   |
| 14 | 71126041  | G | A | rs61980472             | 3.55E-06 | 0.092 | 0.047 | 2.07 | 1.53 | -2.8  | 3.16E-01 | 0.075 | 0.070 | 1.07 | 0.75 | -1.53 | 1.85 | 6.68E-05 | TTC9                                                | intronic   |
| 3  | 88815135  | T | C | rs12633508             | 1.05E-01 | 0.187 | 0.209 | 0.87 | 0.71 | -1.07 | 2.27E-05 | 0.139 | 0.219 | 0.57 | 0.44 | -0.75 | 0.72 | 6.74E-05 | C3orf38(dist=608020), EPHA3(dist=341539)            | intergenic |
| 3  | 195030639 | A | G | rs7610012              | 5.11E-05 | 0.123 | 0.089 | 1.44 | 1.12 | -1.86 | 2.56E-01 | 0.088 | 0.074 | 1.21 | 0.87 | -1.68 | 1.73 | 6.80E-05 | ACAP2                                               | intronic   |
| 5  | 5266695   | G | T | rs890769               | 4.85E-05 | 0.051 | 0.023 | 2.24 | 1.49 | -3.37 | 3.92E-01 | 0.032 | 0.037 | 0.86 | 0.51 | -1.46 | 2.84 | 6.94E-05 | ADAMTS16                                            | intronic   |
| 7  | 86895826  | G | C | rs802100               | 5.54E-06 | 0.369 | 0.288 | 1.45 | 1.22 | -1.71 | 4.54E-01 | 0.299 | 0.279 | 1.10 | 0.9  | -1.35 | 1.32 | 6.97E-05 | TMEM243(dist=46795), TP53TG1(dist=58838)            | intergenic |
| 10 | 119023426 | C | T | rs117220249            | 1.96E-05 | 0.095 | 0.055 | 1.80 | 1.34 | -2.42 | 2.66E-01 | 0.064 | 0.053 | 1.21 | 0.82 | -1.78 | 1.80 | 6.98E-05 | SLC18A2                                             | intronic   |
| 9  | 5042671   | G | A | rs77274685             | 5.89E-05 | 0.050 | 0.027 | 1.87 | 1.25 | -2.8  | 5.18E-01 | 0.021 | 0.023 | 0.92 | 0.48 | -1.77 | 3.14 | 6.99E-05 | JAK2                                                | intronic   |
| 7  | 38034057  | A | G | rs7804635              | 6.15E-02 | 0.458 | 0.500 | 1.18 | 1    | -1.39 | 4.89E-05 | 0.397 | 0.493 | 1.47 | 1.22 | -1.78 | 1.29 | 7.04E-05 | EPDR1(dist=42515), STARD3NL(dist=183751)            | intergenic |
| 7  | 38060438  | A | G | rs7784794              | 5.79E-02 | 0.395 | 0.351 | 1.20 | 1.02 | -1.42 | 6.14E-05 | 0.446 | 0.360 | 1.43 | 1.18 | -1.73 | 1.31 | 7.06E-05 | EPDR1(dist=68896), STARD3NL(dist=157370)            | intergenic |
| 7  | 13379343  | T | G | rs138894749            | 1.86E-01 | 0.033 | 0.026 | 1.28 | 0.8  | -2.04 | 5.48E-07 | 0.054 | 0.022 | 2.59 | 1.68 | -4    | 2.42 | 7.10E-05 | ARL4A(dist=648785), ETV1(dist=551513)               | intergenic |
| 7  | 86898022  | A | G | rs802102               | 4.78E-06 | 0.365 | 0.285 | 1.45 | 1.22 | -1.72 | 4.82E-01 | 0.295 | 0.276 | 1.10 | 0.89 | -1.35 | 1.32 | 7.12E-05 | TMEM243(dist=48991), TP53TG1(dist=56642)            | intergenic |
| 2  | 22940148  | T | C | rs13413896             | 2.38E-06 | 0.099 | 0.055 | 1.88 | 1.4  | -2.51 | 6.17E-01 | 0.058 | 0.050 | 1.19 | 0.8  | -1.78 | 1.76 | 7.13E-05 | LOC102723362(dist=178989), KLHL29(dist=668150)      | intergenic |
| 3  | 171179234 | A | G | rs116638808            | 1.32E-01 | 0.016 | 0.024 | 0.67 | 0.36 | -1.26 | 6.26E-05 | 0.041 | 0.022 | 1.88 | 1.16 | -3.07 | 8.23 | 7.18E-05 | TNKG1(dist=1037), PLD1(dist=138961)                 | intergenic |
| 14 | 107240779 | C | T | rs12887603             | 3.32E-01 | 0.030 | 0.020 | 1.49 | 0.91 | -2.45 | 8.11E-09 | 0.064 | 0.038 | 1.71 | 1.16 | -2.53 | 2.66 | 7.32E-05 | MIR7641-2(dist=148014), MIR5195(dist=18321)         | intergenic |
| 16 | 58165382  | C | T | rs34477501             | 1.83E-01 | 0.044 | 0.032 | 1.39 | 0.92 | -2.09 | 1.23E-05 | 0.089 | 0.056 | 1.66 | 1.19 | -2.32 | 2.08 | 7.33E-05 | CFAP20(dist=2096), CSNK2A2(dist=26430)              | intergenic |
| 7  | 86903624  | A | C | rs1089527              | 7.09E-06 | 0.370 | 0.290 | 1.44 | 1.21 | -1.71 | 4.30E-01 | 0.300 | 0.279 | 1.11 | 0.9  | -1.36 | 1.32 | 7.33E-05 | TMEM243(dist=54593), TP53TG1(dist=51040)            | intergenic |
| 7  | 38059237  | T | A | rs6965880              | 8.08E-02 | 0.478 | 0.438 | 1.17 | 0.99 | -1.38 | 2.86E-05 | 0.549 | 0.453 | 1.47 | 1.21 | -1.77 | 1.29 | 7.35E-05 | EPDR1(dist=67695), STARD3NL(dist=158571)            | intergenic |
| 12 | 59978311  | G | T | rs76855240             | 6.24E-02 | 0.057 | 0.044 | 1.32 | 0.92 | -1.89 | 4.83E-05 | 0.074 | 0.036 | 2.12 | 1.46 | -3.06 | 1.93 | 7.42E-05 | LRIG3(dist=663992), SLC16A7(dist=11510)             | intergenic |
| 6  | 32473321  | G | T | rs72849287             | 2.36E-05 | 0.395 | 0.328 | 0.75 | 0.63 | -0.89 | 1.23E-01 | 0.326 | 0.296 | 0.87 | 0.71 | -1.06 | 0.71 | 7.43E-05 | HLA-DRA(dist=60495), HLA-DRB5(dist=11833)           | intergenic |
| 6  | 32474496  | C | A | rs113060307            | 2.55E-05 | 0.296 | 0.361 | 0.74 | 0.62 | -0.89 | 1.17E-01 | 0.323 | 0.360 | 0.85 | 0.69 | -1.04 | 0.72 | 7.47E-05 | HLA-DRA(dist=61670), HLA-DRB5(dist=10658)           | intergenic |
| 11 | 68069219  | G | A | rs4988293              | 1.18E-01 | 0.171 | 0.145 | 1.22 | 0.98 | -1.52 | 3.01E-05 | 0.230 | 0.166 | 1.50 | 1.2  | -1.87 | 1.44 | 7.52E-05 | C11orf24(dist=29750), LRP5(dist=10858)              | intergenic |
| 6  | 32505477  | C | T | rs72851098             | 5.45E-05 | 0.246 | 0.307 | 0.73 | 0.61 | -0.88 | 8.95E-02 | 0.274 | 0.315 | 0.82 | 0.67 | -1.01 | 0.72 | 7.54E-05 | HLA-DRB5(dist=7471), HLA-DRB6(dist=15013)           | intergenic |
| 7  | 86902545  | T | C | rs1089526              | 6.07E-06 | 0.372 | 0.291 | 1.44 | 1.22 | -1.71 | 4.59E-01 | 0.301 | 0.280 | 1.10 | 0.9  | -1.35 | 1.32 | 7.56E-05 | TMEM243(dist=53514), TP53TG1(dist=52119)            | intergenic |
| 6  | 32473810  | G | A | rs74588093             | 5.37E-05 | 0.296 | 0.360 | 0.75 | 0.62 | -0.89 | 9.33E-02 | 0.350 | 0.393 | 0.83 | 0.68 | -1.01 | 0.73 | 7.60E-05 | HLA-DRA(dist=60984), HLA-DRB5(dist=11344)           | intergenic |
| 6  | 32478848  | G | A | rs111480903            | 1.68E-05 | 0.247 | 0.312 | 0.72 | 0.6  | -0.87 | 1.54E-01 | 0.328 | 0.359 | 0.87 | 0.71 | -1.06 | 0.72 | 7.62E-05 | HLA-DRA(dist=66022), HLA-DRB5(dist=6306)            | intergenic |
| 6  | 110300289 | C | T | rs114598028            | 5.43E-05 | 0.072 | 0.043 | 1.72 | 1.24 | -2.4  | 1.14E-01 | 0.060 | 0.046 | 1.32 | 0.89 | -1.97 | 2.16 | 7.70E-05 | GPR6                                                | intronic   |
| 19 | 55153291  | C | T | rs34256676             | 1.25E-01 | 0.100 | 0.086 | 1.19 | 0.9  | -1.56 | 1.91E-05 | 0.143 | 0.086 | 1.77 | 1.35 | -2.33 | 1.58 | 7.75E-05 | LILRB1(dist=4310), MIR8061(dist=3469)               | intergenic |
| 7  | 13368644  | C | G | rs6962468              | 2.54E-01 | 0.037 | 0.032 | 1.19 | 0.77 | -1.84 | 5.81E-07 | 0.066 | 0.027 | 2.53 | 1.71 | -3.75 | 2.17 | 7.76E-05 | ARL4A(dist=638086), ETV1(dist=562212)               | intergenic |
| 7  | 13368677  | A | C | rs6962361              | 2.21E-01 | 0.040 | 0.034 | 1.19 | 0.78 | -1.82 | 1.66E-06 | 0.066 | 0.028 | 2.46 | 1.66 | -3.64 | 2.16 | 7.81E-05 | ARL4A(dist=638119), ETV1(dist=562179)               | intergenic |
| 16 | 58189977  | C | A | rs34920106             | 2.18E-01 | 0.038 | 0.027 | 1.45 | 0.93 | -2.26 | 1.06E-05 | 0.088 | 0.053 | 1.70 | 1.22 | -2.39 | 2.06 | 7.84E-05 | CFAP20(dist=26681), CSNK2A2(dist=1835)              | intergenic |
| 2  | 22939602  | C | A | rs10176379             | 1.93E-06 | 0.096 | 0.052 | 1.92 | 1.43 | -2.59 | 6.69E-01 | 0.057 | 0.049 | 1.18 | 0.78 | -1.76 | 1.77 | 7.94E-05 | LOC102723362(dist=178443), KLHL29(dist=668696)      | intergenic |
| 6  | 32473799  | T | G | rs75796665             | 4.85E-05 | 0.291 | 0.356 | 0.74 | 0.62 | -0.89 | 1.04E-01 | 0.347 | 0.389 | 0.83 | 0.68 | -1.01 | 0.73 | 8.00E-05 | HLA-DRA(dist=60973), HLA-DRB5(dist=11355)           | intergenic |
| 6  | 32604625  | T | C | rs9272367              | 1.84E-05 | 0.351 | 0.285 | 0.74 | 0.62 | -0.88 | 1.38E-01 | 0.311 | 0.273 | 0.83 | 0.68 | -1.02 | 0.73 | 8.08E-05 | HLA-DQA1                                            | upstream   |
| 17 | 75571993  | C | T | rs73381621             | 7.85E-06 | 0.044 | 0.092 | 0.45 | 0.31 | -0.66 | 5.58E-01 | 0.071 | 0.078 | 0.90 | 0.63 | -1.3  | 0.62 | 8.20E-05 | LOC100507351(dist=10890), LOC100132174(dist=146961) | intergenic |
| 21 | 41372769  | T | C | rs76127774;rs112777433 | 4.68E-06 | 0.067 | 0.037 | 1.84 | 1.3  | -2.61 | 4.99E-01 | 0.044 | 0.040 | 1.10 | 0.7  | -1.75 | 2.27 | 8.22E-05 | PCP4(dist=71447), DSCAM(dist=11574)                 | intergenic |
| 1  | 232379400 | G | A | rs74146130             | 6.28E-05 | 0.052 | 0.032 | 1.63 | 1.11 | -2.4  | 1.15E-01 | 0.031 | 0.024 | 1.30 | 0.75 | -2.25 | 3.99 | 8.23E-05 | TSNAX-DISC1(dist=202381), SIPA1L2(dist=154312)      | intergenic |
| 17 | 40541534  | A | G | rs45494601             | 6.72E-02 | 0.096 | 0.078 | 1.25 | 0.94 | -1.66 | 2.68E-05 | 0.104 | 0.056 | 1.94 | 1.42 | -2.66 | 1.65 | 8.28E-05 | STAT3(dist=1021), PTRF(dist=12933)                  | intergenic |
| 14 | 71124837  | T | C | rs61980470             | 3.60E-06 | 0.087 | 0.044 | 2.06 | 1.51 | -2.81 | 3.32E-01 | 0.072 | 0.067 | 1.07 | 0.74 | -1.54 | 1.89 | 8.29E-05 | TTC9                                                | intronic   |
| 7  | 13381166  | T | G | rs115735226            | 3.74E-01 | 0.033 | 0.028 | 1.17 | 0.73 | -1.86 | 3.30E-08 | 0.062 | 0.026 | 2.50 | 1.67 | -3.75 | 2.35 | 8.34E-05 | ARL4A(dist=650608), ETV1(dist=549690)               | intergenic |
| 7  | 13382529  | T | G | rs113812595            | 3.74E-01 | 0.033 | 0.028 | 1.17 | 0.73 | -1.86 | 3.30E-08 | 0.062 | 0.026 | 2.50 | 1.67 | -3.75 | 2.35 | 8.34E-05 | ARL4A(dist=651971), ETV1(dist=548327)               | intergenic |
| 11 | 68059316  | G | A | rs10791974             | 1.02E-01 | 0.172 | 0.142 | 1.26 | 1.01 | -1.57 | 6.08E-05 | 0.226 | 0.165 | 1.48 | 1.18 | -1.85 | 1.43 | 8.38E-05 | C11orf24(dist=19847), LRP5(dist=20761)              | intergenic |
| 18 | 52327970  | C | G | rs75942301             | 1.31E-01 | 0.093 | 0.082 | 1.15 | 0.86 | -1.53 | 4.54E-06 | 0.113 | 0.063 | 1.91 | 1.41 | -2.58 | 1.64 | 8.40E-05 | DYNAP(dist=61246), RAB27B(dist=167738)              | intergenic |
| 10 | 134957853 | T | G | rs11592855             | 3.17E-01 | 0.036 | 0.039 | 0.92 | 0.59 | -1.42 | 6.02E-05 | 0.065 | 0.045 | 1.47 | 1    | -2.16 | 5.05 | 8.47E-05 | ADGRA1(dist=12674), KNDC1(dist=16118)               | intergenic |
| 20 | 8184723   | T | G | rs6118111              | 1.31E-01 | 0.069 | 0.055 | 1.27 | 0.92 | -1.76 | 8.81E-06 | 0.094 | 0.048 | 2.03 | 1.46 | -2.83 | 1.77 | 8.54E-05 | PLCB1                                               | intronic   |
| 18 | 70408553  | G | T | rs9945341              | 4.95E-05 | 0.411 | 0.340 | 1.35 | 1.15 | -1.6  | 1.78E-01 | 0.368 | 0.337 | 1.15 | 0.94 | -1.39 | 1.32 | 8.54E-05 | NETO1                                               | downstream |
| 16 | 58213567  | T | C | rs2550357              | 1.82E-01 | 0.039 | 0.027 | 1.46 | 0.95 | -2.26 | 2.24E-05 | 0.089 | 0.055 | 1.69 | 1.21 | -2.36 | 2.02 | 8.57E-05 | CSNK2A2                                             | intronic   |
| 11 | 754250    |   |   |                        |          |       |       |      |      |       |          |       |       |      |      |       |      |          |                                                     |            |



|    |           |   |   |                       |          |       |       |      |      |       |          |       |       |      |      |       |      |          |                                                  |                |
|----|-----------|---|---|-----------------------|----------|-------|-------|------|------|-------|----------|-------|-------|------|------|-------|------|----------|--------------------------------------------------|----------------|
| 6  | 32473248  | C | A | rs142633963           | 2.02E-05 | 0.300 | 0.368 | 0.74 | 0.62 | -0.88 | 1.69E-01 | 0.366 | 0.400 | 0.87 | 0.71 | -1.05 | 0.73 | 8.74E-05 | HLA-DRA(dist=60422), HLA-DRB5(dist=11906)        | intergenic     |
| 20 | 8200249   | T | C | rs6108124             | 1.40E-01 | 0.046 | 0.034 | 1.36 | 0.91 | -2.03 | 2.40E-05 | 0.072 | 0.034 | 2.21 | 1.52 | -3.22 | 1.98 | 8.77E-05 | PLCB1                                            | intronic       |
| 6  | 32484837  | G | A | rs191255170           | 3.68E-05 | 0.311 | 0.377 | 0.75 | 0.63 | -0.89 | 1.24E-01 | 0.371 | 0.407 | 0.86 | 0.71 | -1.04 | 0.73 | 8.80E-05 | HLA-DRB5                                         | downstream     |
| 20 | 8207459   | C | T | rs6055669             | 1.42E-01 | 0.045 | 0.034 | 1.35 | 0.9  | -2.02 | 2.61E-05 | 0.071 | 0.033 | 2.23 | 1.53 | -3.24 | 1.98 | 8.83E-05 | PLCB1                                            | intronic       |
| 14 | 107235449 | T | C | rs67530028            | 5.86E-01 | 0.035 | 0.027 | 1.33 | 0.84 | -2.09 | 1.34E-08 | 0.076 | 0.043 | 1.83 | 1.27 | -2.62 | 2.32 | 8.83E-05 | MIR7641-2(dist=142684), MIR5195(dist=23651)      | intergenic     |
| 20 | 8199238   | T | C | rs78864344            | 1.40E-01 | 0.046 | 0.034 | 1.36 | 0.91 | -2.03 | 2.37E-05 | 0.072 | 0.034 | 2.21 | 1.52 | -3.21 | 1.98 | 8.84E-05 | PLCB1                                            | intergenic     |
| 20 | 8199168   | C | T | rs6118122             | 1.40E-01 | 0.046 | 0.034 | 1.36 | 0.91 | -2.03 | 2.37E-05 | 0.072 | 0.034 | 2.21 | 1.52 | -3.21 | 1.98 | 8.85E-05 | PLCB1                                            | intronic       |
| 20 | 8205226   | C | T | rs6055667             | 1.40E-01 | 0.045 | 0.034 | 1.35 | 0.91 | -2.03 | 2.69E-05 | 0.071 | 0.033 | 2.22 | 1.53 | -3.24 | 1.98 | 8.87E-05 | PLCB1                                            | intronic       |
| 20 | 8198500   | C | T | rs150923311           | 1.41E-01 | 0.046 | 0.034 | 1.36 | 0.91 | -2.03 | 2.37E-05 | 0.072 | 0.034 | 2.21 | 1.52 | -3.21 | 1.98 | 8.99E-05 | PLCB1                                            | intronic       |
| 3  | 110213625 | A | G | rs2137381             | 8.49E-07 | 0.160 | 0.104 | 0.61 | 0.48 | -0.77 | 7.94E-01 | 0.122 | 0.109 | 0.88 | 0.66 | -1.18 | 0.67 | 8.99E-05 | MIR4445(dist=891881), PVRL3-AS1(dist=550538)     | intergenic     |
| 4  | 123972793 | A | C | rs4314302             | 4.64E-05 | 0.078 | 0.046 | 1.75 | 1.27 | -2.41 | 2.32E-01 | 0.054 | 0.042 | 1.31 | 0.86 | -1.99 | 1.87 | 9.01E-05 | SPATA5                                           | intronic       |
| 20 | 8198234   | G | A | rs6055661             | 1.42E-01 | 0.046 | 0.034 | 1.36 | 0.91 | -2.03 | 2.37E-05 | 0.072 | 0.034 | 2.21 | 1.52 | -3.21 | 1.98 | 9.07E-05 | PLCB1                                            | intronic       |
| 3  | 110210464 | T | C | rs1398416             | 6.62E-07 | 0.155 | 0.101 | 0.61 | 0.48 | -0.77 | 7.96E-01 | 0.122 | 0.109 | 0.88 | 0.66 | -1.18 | 0.66 | 9.12E-05 | MIR4445(dist=888720), PVRL3-AS1(dist=553699)     | intergenic     |
| 2  | 207763631 | T | C | rs144260439           | 2.51E-07 | 0.052 | 0.022 | 2.45 | 1.63 | -3.7  | 7.47E-01 | 0.033 | 0.029 | 1.13 | 0.67 | -1.91 | 2.20 | 9.15E-05 | FASTKD2(dist=102720), CPO1(dist=40647)           | intergenic     |
| 4  | 140653321 | C | T | rs1979188             | 4.07E-05 | 0.052 | 0.028 | 0.54 | 0.36 | -0.8  | 3.30E-01 | 0.028 | 0.022 | 0.78 | 0.44 | -1.38 | 0.41 | 9.19E-05 | MAML3, MGST2                                     | intronic       |
| 20 | 8197247   | G | A | rs59378173            | 1.46E-01 | 0.046 | 0.034 | 1.35 | 0.91 | -2.02 | 2.20E-05 | 0.072 | 0.034 | 2.21 | 1.52 | -3.21 | 1.98 | 9.21E-05 | PLCB1                                            | intronic       |
| 17 | 65245551  | G | A | rs112713034           | 3.21E-01 | 0.031 | 0.027 | 1.16 | 0.72 | -1.87 | 2.21E-06 | 0.059 | 0.027 | 2.26 | 1.5  | -3.42 | 2.61 | 9.23E-05 | HELZ(dist=4232), PSM12(dist=91068)               | intergenic     |
| 6  | 32484834  | G | A | rs185958327           | 2.80E-05 | 0.087 | 0.349 | 0.75 | 0.63 | -0.89 | 1.40E-01 | 0.353 | 0.388 | 0.86 | 0.71 | -1.04 | 0.72 | 9.28E-05 | HLA-DRB5                                         | downstream     |
| 6  | 155419492 | A | G | rs59944590            | 1.37E-06 | 0.070 | 0.035 | 2.04 | 1.44 | -2.88 | 5.14E-01 | 0.044 | 0.037 | 1.20 | 0.76 | -1.91 | 2.03 | 9.28E-05 | TIAM2                                            | intronic       |
| 7  | 64618870  | C | T | rs2671947             | 8.36E-06 | 0.125 | 0.082 | 1.61 | 1.24 | -2.08 | 5.70E-01 | 0.098 | 0.089 | 1.11 | 0.81 | -1.53 | 1.71 | 9.32E-05 | CCT6P3(dist=83779), ZNF92(dist=219842)           | intergenic     |
| 20 | 8196534   | G | C | rs80225662            | 1.49E-01 | 0.046 | 0.034 | 1.35 | 0.9  | -2.02 | 2.08E-05 | 0.072 | 0.034 | 2.21 | 1.52 | -3.21 | 1.97 | 9.35E-05 | PLCB1                                            | intronic       |
| 20 | 8196636   | G | A | rs6118119             | 1.49E-01 | 0.046 | 0.034 | 1.35 | 0.9  | -2.02 | 2.09E-05 | 0.072 | 0.034 | 2.21 | 1.52 | -3.21 | 1.97 | 9.36E-05 | PLCB1                                            | intronic       |
| 6  | 155419376 | T | C | rs61106640            | 1.39E-06 | 0.070 | 0.036 | 2.04 | 1.44 | -2.88 | 5.15E-01 | 0.044 | 0.037 | 1.20 | 0.76 | -1.91 | 2.03 | 9.38E-05 | TIAM2                                            | intronic       |
| 3  | 110211164 | G | T | rs1512683             | 9.12E-07 | 0.160 | 0.104 | 0.61 | 0.49 | -0.77 | 7.95E-01 | 0.122 | 0.109 | 0.88 | 0.66 | -1.18 | 0.67 | 9.41E-05 | MIR4445(dist=889420), PVRL3-AS1(dist=552999)     | intergenic     |
| 1  | 200881947 | C | T | rs75782292            | 6.54E-02 | 0.044 | 0.032 | 1.36 | 0.9  | -2.05 | 2.88E-05 | 0.055 | 0.029 | 1.92 | 1.26 | -2.93 | 2.40 | 9.47E-05 | C1orf106                                         | intronic       |
| 12 | 45852201  | A | G | rs10736026            | 1.12E-06 | 0.585 | 0.478 | 1.54 | 1.31 | -1.82 | 9.49E-01 | 0.509 | 0.498 | 0.96 | 0.79 | -1.15 | 1.30 | 9.48E-05 | ANO6(dist=18014), LINC00938(dist=267302)         | intergenic     |
| 6  | 32595429  | T | C | rs6926251             | 3.47E-05 | 0.478 | 0.404 | 0.74 | 0.63 | -0.87 | 1.26E-01 | 0.384 | 0.342 | 0.83 | 0.69 | -1.01 | 0.75 | 9.51E-05 | HLA-DRB1(dist=37816), HLA-DQA1(dist=9754)        | intergenic     |
| 20 | 52856109  | G | C | rs117244912           | 1.53E-01 | 0.036 | 0.025 | 1.45 | 0.92 | -2.29 | 1.58E-05 | 0.060 | 0.037 | 1.66 | 1.11 | -2.48 | 2.64 | 9.53E-05 | PPDN4(dist=19617), DOK5(dist=235902)             | intergenic     |
| 3  | 110215441 | G | A | rs2089940             | 8.70E-07 | 0.160 | 0.104 | 0.61 | 0.48 | -0.77 | 8.05E-01 | 0.122 | 0.110 | 0.89 | 0.66 | -1.18 | 0.67 | 9.54E-05 | MIR4445(dist=893697), PVRL3-AS1(dist=548722)     | intergenic     |
| 7  | 38036389  | A | G | rs12533160            | 7.80E-02 | 0.464 | 0.502 | 1.17 | 0.99 | -1.37 | 4.72E-05 | 0.403 | 0.498 | 1.47 | 1.21 | -1.78 | 1.29 | 9.56E-05 | EPDR1(dist=44847), STARD3NL(dist=181419)         | intergenic     |
| 3  | 110208581 | G | T | rs1949181             | 9.31E-07 | 0.160 | 0.104 | 0.61 | 0.49 | -0.77 | 7.96E-01 | 0.122 | 0.109 | 0.88 | 0.66 | -1.18 | 0.67 | 9.60E-05 | MIR4445(dist=886837), PVRL3-AS1(dist=555582)     | intergenic     |
| 10 | 113628958 | G | A | rs113980247           | 7.12E-02 | 0.038 | 0.029 | 1.31 | 0.85 | -2.04 | 2.25E-05 | 0.052 | 0.025 | 2.11 | 1.36 | -3.26 | 2.48 | 9.60E-05 | ADRA2A(dist=788296), GPAM(dist=280664)           | intergenic     |
| 7  | 13357101  | C | A | rs149751885           | 1.81E-01 | 0.031 | 0.024 | 1.28 | 0.8  | -2.08 | 3.24E-06 | 0.053 | 0.021 | 2.58 | 1.66 | -4    | 2.40 | 9.69E-05 | ARL4A(dist=626543), ETV1(dist=573755)            | intergenic     |
| 3  | 110206030 | T | C | rs9633345             | 6.97E-07 | 0.154 | 0.100 | 0.61 | 0.48 | -0.77 | 7.98E-01 | 0.122 | 0.109 | 0.88 | 0.66 | -1.18 | 0.66 | 9.69E-05 | MIR4445(dist=884286), PVRL3-AS1(dist=558133)     | intergenic     |
| 5  | 122295884 | A | G | rs17149763            | 1.45E-05 | 0.157 | 0.103 | 1.63 | 1.29 | -2.05 | 2.81E-01 | 0.121 | 0.106 | 1.17 | 0.88 | -1.56 | 1.50 | 9.70E-05 | SNX24                                            | intronic       |
| 7  | 153912050 | C | T | rs28576062            | 3.04E-05 | 0.145 | 0.099 | 1.54 | 1.21 | -1.96 | 3.33E-01 | 0.114 | 0.098 | 1.19 | 0.88 | -1.59 | 1.58 | 9.71E-05 | DPP6                                             | intronic       |
| 3  | 110205332 | A | G | rs2399339             | 9.36E-07 | 0.160 | 0.104 | 0.61 | 0.49 | -0.77 | 7.98E-01 | 0.122 | 0.109 | 0.88 | 0.66 | -1.18 | 0.67 | 9.80E-05 | MIR4445(dist=883588), PVRL3-AS1(dist=558831)     | intergenic     |
| 7  | 13357112  | G | C | rs145682876           | 1.81E-01 | 0.031 | 0.024 | 1.28 | 0.8  | -2.08 | 3.33E-06 | 0.053 | 0.021 | 2.58 | 1.66 | -3.99 | 2.40 | 9.82E-05 | ARL4A(dist=626554), ETV1(dist=573744)            | intergenic     |
| 8  | 97199024  | G | C | rs16894364            | 3.62E-06 | 0.062 | 0.031 | 2.10 | 1.45 | -3.02 | 9.82E-01 | 0.029 | 0.027 | 1.06 | 0.61 | -1.86 | 2.15 | 9.84E-05 | GDF6(dist=26004), UQCRB(dist=39880)              | intergenic     |
| 3  | 110261864 | A | G | rs1398350             | 1.18E-06 | 0.169 | 0.112 | 0.62 | 0.49 | -0.77 | 7.88E-01 | 0.128 | 0.115 | 0.88 | 0.67 | -1.17 | 0.68 | 9.91E-05 | MIR4445(dist=940120), PVRL3-AS1(dist=502299)     | intergenic     |
| 6  | 32505357  | C | A | rs72851096            | 3.50E-05 | 0.255 | 0.320 | 0.73 | 0.6  | -0.87 | 1.41E-01 | 0.286 | 0.323 | 0.84 | 0.68 | -1.03 | 0.73 | 9.92E-05 | HLA-DRB5(dist=7351), HLA-DRB6(dist=15133)        | intergenic     |
| 6  | 32446994  | G | A | rs71535414;rs17203626 | 1.79E-05 | 0.175 | 0.239 | 0.68 | 0.55 | -0.84 | 1.77E-01 | 0.223 | 0.257 | 0.83 | 0.66 | -1.04 | 0.72 | 1.01E-04 | HLA-DRA(dist=34168), HLA-DRB5(dist=38160)        | intergenic     |
| 1  | 154474900 | G | A | rs12753680            | 7.10E-06 | 0.289 | 0.205 | 1.58 | 1.31 | -1.9  | 3.37E-01 | 0.257 | 0.249 | 1.04 | 0.84 | -1.29 | 1.39 | 1.01E-04 | TDRD10                                           | UTR5           |
| 6  | 32539553  | T | C | rs187582489           | 1.36E-01 | 0.479 | 0.504 | 0.90 | 0.77 | -1.07 | 9.15E-06 | 0.527 | 0.443 | 0.72 | 0.59 | -0.86 | 0.73 | 1.01E-04 | HLA-DRB6(dist=11774), HLA-DRB1(dist=6994)        | intergenic     |
| 4  | 123994272 | A | G | rs149342637           | 5.50E-05 | 0.063 | 0.035 | 1.86 | 1.3  | -2.65 | 2.24E-01 | 0.044 | 0.034 | 1.32 | 0.83 | -2.09 | 2.04 | 1.01E-04 | SPATA5                                           | intronic       |
| 20 | 33228708  | A | T | rs149562449           | 4.90E-05 | 0.058 | 0.031 | 1.90 | 1.3  | -2.76 | 3.08E-01 | 0.029 | 0.021 | 1.38 | 0.79 | -2.42 | 2.21 | 1.01E-04 | PIGU                                             | intronic       |
| 2  | 8508633   | G | A | rs60743715            | 1.09E-01 | 0.073 | 0.060 | 1.24 | 0.9  | -1.71 | 8.45E-06 | 0.090 | 0.051 | 1.82 | 1.3  | -2.54 | 1.88 | 1.02E-04 | LINC00299(dist=40084), LOC101929567(dist=191330) | intergenic     |
| 20 | 33225182  | A | T | rs146571308           | 4.90E-05 | 0.058 | 0.031 | 1.90 | 1.3  | -2.76 | 3.09E-01 | 0.029 | 0.021 | 1.38 | 0.78 | -2.42 | 2.21 | 1.02E-04 | PIGU                                             | intronic       |
| 14 | 21065976  | C | T | rs17211537            | 1.89E-01 | 0.036 | 0.026 | 1.44 | 0.92 | -2.26 | 1.41E-05 | 0.064 | 0.034 | 1.97 | 1.33 | -2.91 | 2.24 | 1.02E-04 | LOC254028                                        | ncRNA_intronic |
| 20 | 33224744  | C | T | rs149840593           | 4.91E-05 | 0.058 | 0.031 | 1.90 | 1.3  | -2.76 | 3.09E-01 | 0.029 | 0.021 | 1.38 | 0.78 | -2.42 | 2.21 | 1.02E-04 | PIGU                                             | intronic       |
| 10 | 119063811 | T | C | rs114882632           | 4.42E-05 | 0.081 | 0.046 | 1.81 | 1.32 | -2.48 | 1.87E-01 | 0.057 | 0.045 | 1.29 | 0.86 | -1.94 | 1.83 | 1.03E-04 | PDZD8                                            | intronic       |
| 9  | 76638339  | T | G | rs1491439             | 3.86E-07 | 0.104 | 0.055 | 2.00 | 1.51 | -2.67 | 6.88E-01 | 0.097 | 0.094 | 1.04 | 0.76 | -1.43 | 1.71 | 1.03E-04 | MIR6130                                          | ncRNA_intronic |
| 2  | 217491962 | A | G | rs78892244            | 4.67E-02 | 0.058 | 0.046 | 1.27 | 0.89 | -1.81 | 3.84E-05 | 0.065 | 0.039 | 1.75 | 1.19 | -2.57 | 2.28 | 1.05E-04 | LINC01280(dist=20301), IGFBP2(dist=6165)         | intergenic     |
| 20 | 9729332   | C | T | rs11391763            | 6.26E-02 | 0.066 | 0.057 | 1.18 | 0.85 | -1.65 | 5.66E-05 | 0.074 | 0.045 | 1.71 | 1.19 | -2.46 | 2.19 | 1.05E-04 | PAK7                                             | intronic       |
| 6  | 32457258  | T | C | rs75078575            | 3.73E-05 | 0.374 | 0.438 | 0.77 | 0.65 | -0.91 | 1.41E-01 | 0.428 | 0.465 | 0.86 | 0.71 | -1.04 | 0.73 | 1.06E-04 | HLA-DRA(dist=44432), HLA-DRB5(dist=27896)        | intergenic     |
| 4  | 123962257 | T | G | rs149042931           | 5.08E-05 | 0.078 | 0.044 | 1.81 | 1.31 | -2.5  | 2.63E-01 | 0.051 | 0.039 | 1.30 | 0.85 | -2    | 1.84 | 1.07E-04 | SPATA5                                           | intronic       |
| 11 | 68055190  | A | G | rs2175589             | 1.30E-01 | 0.168 | 0.139 | 1.25 | 1    | -1.56 | 5.23E-05 | 0.226 | 0.163 | 1.49 | 1.19 | -1.87 | 1.42 | 1.08E-04 | C11orf24(dist=15721), LRP5(dist=24887)           | intergenic     |

|    |           |   |   |                        |          |       |       |      |      |       |          |       |       |      |      |       |      |          |                                                |                |
|----|-----------|---|---|------------------------|----------|-------|-------|------|------|-------|----------|-------|-------|------|------|-------|------|----------|------------------------------------------------|----------------|
| 12 | 132240201 | A | C | rs112667045            | 1.80E-05 | 0.052 | 0.025 | 2.09 | 1.4  | -3.11 | 4.03E-01 | 0.032 | 0.024 | 1.31 | 0.76 | -2.25 | 2.26 | 1.13E-04 | SFSWAP                                         | intronic       |
| 12 | 132240273 | A | C | rs113370249            | 1.81E-05 | 0.052 | 0.025 | 2.09 | 1.4  | -3.11 | 4.03E-01 | 0.032 | 0.024 | 1.31 | 0.76 | -2.25 | 2.26 | 1.13E-04 | SFSWAP                                         | intronic       |
| 5  | 153170908 | T | C | rs75030892             | 2.76E-05 | 0.191 | 0.135 | 1.52 | 1.22 | -1.88 | 3.06E-01 | 0.145 | 0.125 | 1.19 | 0.91 | -1.55 | 1.45 | 1.14E-04 | GRIA1                                          | intronic       |
| 16 | 76971361  | G | A | rs9935857              | 1.30E-05 | 0.122 | 0.076 | 1.69 | 1.31 | -2.2  | 4.45E-01 | 0.088 | 0.076 | 1.17 | 0.84 | -1.63 | 1.60 | 1.14E-04 | MIR4719(dist=68445), MON1B(dist=253455)        | intergenic     |
| 1  | 184425928 | T | A | rs114998100            | 1.08E-01 | 0.032 | 0.024 | 1.32 | 0.82 | -2.13 | 2.74E-05 | 0.052 | 0.024 | 2.19 | 1.41 | -3.39 | 2.44 | 1.14E-04 | C1orf21                                        | intronic       |
| 10 | 43934638  | C | T | rs148412921            | 1.67E-06 | 0.075 | 0.036 | 2.18 | 1.56 | -3.05 | 4.99E-01 | 0.059 | 0.053 | 1.12 | 0.75 | -1.66 | 1.87 | 1.15E-04 | ZNF487                                         | ncRNA_intronic |
| 6  | 32455194  | G | A | rs111664333            | 3.45E-06 | 0.276 | 0.344 | 0.73 | 0.61 | -0.87 | 4.12E-01 | 0.337 | 0.360 | 0.90 | 0.74 | -1.1  | 0.71 | 1.16E-04 | HLA-DRA(dist=42368), HLA-DRB5(dist=29960)      | intergenic     |
| 7  | 13385974  | A | G | rs10249150             | 1.71E-01 | 0.042 | 0.034 | 1.23 | 0.82 | -1.87 | 5.03E-06 | 0.067 | 0.030 | 2.35 | 1.59 | -3.46 | 2.04 | 1.16E-04 | ARL4A(dist=655416), ETV1(dist=544882)          | intergenic     |
| 1  | 154442960 | G | A | rs11265621             | 7.19E-08 | 0.450 | 0.337 | 1.61 | 1.37 | -1.9  | 8.92E-01 | 0.367 | 0.377 | 0.96 | 0.79 | -1.16 | 1.31 | 1.16E-04 | IL6R(dist=1034), SHE(dist=8994)                | intergenic     |
| 5  | 122317994 | T | C | rs3776181              | 1.64E-05 | 0.158 | 0.104 | 1.62 | 1.29 | -2.04 | 2.90E-01 | 0.123 | 0.107 | 1.17 | 0.88 | -1.56 | 1.49 | 1.17E-04 | SNX24                                          | intronic       |
| 1  | 184425658 | T | G | rs115976532            | 1.10E-01 | 0.032 | 0.024 | 1.32 | 0.82 | -2.13 | 2.82E-05 | 0.052 | 0.024 | 2.18 | 1.41 | -3.38 | 2.44 | 1.18E-04 | C1orf21                                        | intronic       |
| 6  | 32503843  | G | A | rs79401736             | 1.66E-05 | 0.216 | 0.280 | 0.71 | 0.58 | -0.86 | 2.26E-01 | 0.242 | 0.270 | 0.86 | 0.69 | -1.07 | 0.71 | 1.19E-04 | HLA-DRB5(dist=5837), HLA-DRB6(dist=16647)      | intergenic     |
| 6  | 32472605  | C | T | rs199513385;rs75427248 | 5.15E-05 | 0.305 | 0.370 | 0.75 | 0.63 | -0.89 | 1.24E-01 | 0.356 | 0.392 | 0.86 | 0.7  | -1.04 | 0.74 | 1.19E-04 | HLA-DRA(dist=59779), HLA-DRB5(dist=12549)      | intergenic     |
| 4  | 140990385 | T | C | rs17005526             | 5.11E-02 | 0.099 | 0.087 | 1.16 | 0.88 | -1.52 | 3.58E-05 | 0.090 | 0.057 | 1.64 | 1.18 | -2.29 | 1.90 | 1.19E-04 | MAML3                                          | intronic       |
| 14 | 63513969  | C | T | rs61586644             | 5.27E-01 | 0.120 | 0.116 | 1.03 | 0.8  | -1.33 | 3.19E-07 | 0.184 | 0.112 | 1.79 | 1.4  | -2.29 | 1.55 | 1.20E-04 | KCNH5(dist=2013), RHOJ(dist=157133)            | intergenic     |
| 7  | 13360198  | A | G | rs78125148             | 1.87E-01 | 0.041 | 0.034 | 1.22 | 0.8  | -1.85 | 7.10E-06 | 0.067 | 0.029 | 2.39 | 1.62 | -3.53 | 2.05 | 1.20E-04 | ARL4A(dist=629640), ETV1(dist=570658)          | intergenic     |
| 6  | 32534471  | C | T | rs17209964             | 5.70E-06 | 0.184 | 0.246 | 0.69 | 0.56 | -0.85 | 2.90E-01 | 0.261 | 0.289 | 0.87 | 0.7  | -1.08 | 0.71 | 1.20E-04 | HLA-DRB6(dist=6692), HLA-DRB1(dist=12076)      | intergenic     |
| 7  | 38039300  | A | G | rs6971093              | 8.94E-02 | 0.456 | 0.494 | 1.16 | 0.99 | -1.37 | 4.88E-05 | 0.392 | 0.488 | 1.48 | 1.22 | -1.79 | 1.28 | 1.21E-04 | EPDR1(dist=47758), STARD3NL(dist=178508)       | intergenic     |
| 6  | 32548359  | T | C | rs28732269             | 5.58E-05 | 0.060 | 0.097 | 0.60 | 0.43 | -0.83 | 1.57E-03 | 0.058 | 0.091 | 0.62 | 0.42 | -0.92 | 0.47 | 1.22E-04 | HLA-DRB1                                       | intronic       |
| 3  | 184517041 | C | T | rs201867546;rs7633575  | 6.57E-06 | 0.387 | 0.468 | 0.72 | 0.61 | -0.85 | 5.55E-01 | 0.416 | 0.418 | 0.99 | 0.82 | -1.2  | 0.72 | 1.22E-04 | LOC101928992(dist=26098), VPS8(dist=12890)     | intergenic     |
| 7  | 38034119  | C | T | rs28455667             | 8.15E-02 | 0.455 | 0.493 | 1.17 | 0.92 | -1.37 | 6.21E-05 | 0.393 | 0.488 | 1.47 | 1.21 | -1.78 | 1.28 | 1.22E-04 | EPDR1(dist=42577), STARD3NL(dist=183689)       | intergenic     |
| 3  | 110201614 | G | A | rs1588659              | 4.67E-07 | 0.126 | 0.076 | 0.58 | 0.44 | -0.74 | 9.61E-01 | 0.087 | 0.080 | 0.90 | 0.65 | -1.26 | 0.63 | 1.23E-04 | MIR4445(dist=879870), PVRL3-AS1(dist=562549)   | intergenic     |
| 5  | 122258673 | C | T | rs17149739             | 1.23E-05 | 0.155 | 0.101 | 1.63 | 1.29 | -2.06 | 3.27E-01 | 0.120 | 0.105 | 1.16 | 0.87 | -1.55 | 1.49 | 1.24E-04 | SNX24                                          | intronic       |
| 5  | 122308879 | A | G | rs1813477              | 1.76E-05 | 0.169 | 0.115 | 1.56 | 1.24 | -1.95 | 2.97E-01 | 0.130 | 0.114 | 1.16 | 0.88 | -1.53 | 1.48 | 1.24E-04 | SNX24                                          | intronic       |
| 7  | 41277400  | C | T | rs73687970             | 8.26E-02 | 0.097 | 0.082 | 1.21 | 0.92 | -1.6  | 4.10E-05 | 0.120 | 0.072 | 1.76 | 1.31 | -2.36 | 1.64 | 1.24E-04 | LINC01449(dist=104301), INHBA(dist=451201)     | intergenic     |
| 3  | 110219574 | A | C | rs6789452              | 1.91E-06 | 0.164 | 0.110 | 0.63 | 0.5  | -0.79 | 7.45E-01 | 0.129 | 0.115 | 0.88 | 0.66 | -1.16 | 0.67 | 1.24E-04 | MIR4445(dist=897830), PVRL3-AS1(dist=544589)   | intergenic     |
| 19 | 52787983  | C | G | rs7255987              | 3.15E-01 | 0.195 | 0.179 | 1.11 | 0.9  | -1.37 | 6.79E-07 | 0.244 | 0.165 | 1.63 | 1.31 | -2.03 | 1.42 | 1.25E-04 | ZNF766                                         | intronic       |
| 4  | 96531776  | C | T | rs72878392             | 6.15E-06 | 0.188 | 0.131 | 1.54 | 1.24 | -1.91 | 5.39E-01 | 0.143 | 0.130 | 1.12 | 0.86 | -1.47 | 1.44 | 1.25E-04 | UNC5C(dist=61415), PDHA2(dist=229463)          | intergenic     |
| 5  | 122361903 | C | T | rs41527147             | 2.01E-05 | 0.154 | 0.101 | 1.62 | 1.28 | -2.05 | 2.79E-01 | 0.121 | 0.105 | 1.18 | 0.88 | -1.57 | 1.49 | 1.25E-04 | PPIC                                           | intronic       |
| 6  | 32526272  | T | C | rs28679786             | 5.00E-05 | 0.299 | 0.244 | 0.75 | 0.63 | -0.9  | 1.06E-01 | 0.246 | 0.219 | 0.86 | 0.69 | -1.07 | 0.69 | 1.25E-04 | HLA-DRB6                                       | ncRNA_intronic |
| 20 | 9727639   | G | A | rs8120342              | 7.67E-02 | 0.067 | 0.056 | 1.21 | 0.87 | -1.69 | 6.46E-05 | 0.082 | 0.048 | 1.79 | 1.26 | -2.53 | 1.96 | 1.26E-04 | PAK7                                           | intronic       |
| 5  | 122358015 | G | T | rs6891052;rs386691898  | 8.91E-06 | 0.154 | 0.100 | 1.64 | 1.3  | -2.08 | 3.78E-01 | 0.114 | 0.101 | 1.15 | 0.86 | -1.55 | 1.50 | 1.26E-04 | SNX24(dist=13113), PPIC(dist=1063)             | intergenic     |
| 21 | 24317655  | T | C | rs62210670             | 1.50E-01 | 0.034 | 0.024 | 1.41 | 0.89 | -2.25 | 1.01E-05 | 0.056 | 0.035 | 1.65 | 1.09 | -2.49 | 2.59 | 1.26E-04 | LINC00308(dist=828808), D21S2088E(dist=415771) | intergenic     |
| 5  | 122353293 | A | G | rs115328214            | 2.15E-05 | 0.155 | 0.102 | 1.62 | 1.28 | -2.05 | 2.68E-01 | 0.123 | 0.106 | 1.18 | 0.89 | -1.57 | 1.49 | 1.26E-04 | SNX24(dist=8391), PPIC(dist=5785)              | intergenic     |
| 12 | 132254398 | T | C | rs145958805            | 1.42E-05 | 0.051 | 0.025 | 2.12 | 1.41 | -3.18 | 4.18E-01 | 0.031 | 0.024 | 1.31 | 0.76 | -2.25 | 2.25 | 1.26E-04 | SFSWAP                                         | intronic       |
| 17 | 40502310  | G | C | rs17885278             | 9.51E-02 | 0.093 | 0.077 | 1.22 | 0.92 | -1.63 | 3.70E-05 | 0.106 | 0.057 | 1.96 | 1.44 | -2.68 | 1.61 | 1.27E-04 | STAT3                                          | intronic       |
| 6  | 129245211 | A | C | rs17779657             | 4.30E-05 | 0.230 | 0.168 | 1.48 | 1.22 | -1.81 | 1.49E-01 | 0.206 | 0.175 | 1.22 | 0.97 | -1.54 | 1.40 | 1.28E-04 | LAMA2                                          | intronic       |
| 2  | 143465119 | G | A | rs12469809             | 1.72E-01 | 0.147 | 0.115 | 1.32 | 1.05 | -1.67 | 9.92E-06 | 0.209 | 0.158 | 1.40 | 1.11 | -1.77 | 1.50 | 1.28E-04 | LRP1B(dist=575849), KYNU(dist=170076)          | intergenic     |
| 11 | 68052121  | A | G | rs7479746              | 1.41E-01 | 0.167 | 0.139 | 1.24 | 1    | -1.55 | 5.75E-05 | 0.226 | 0.163 | 1.49 | 1.19 | -1.87 | 1.41 | 1.30E-04 | C11orf24(dist=12652), LRP5(dist=27956)         | intergenic     |
| 3  | 110214916 | G | A | rs1949178              | 9.95E-07 | 0.156 | 0.101 | 0.61 | 0.48 | -0.77 | 8.63E-01 | 0.119 | 0.108 | 0.89 | 0.67 | -1.19 | 0.67 | 1.31E-04 | MIR4445(dist=893172), PVRL3-AS1(dist=549247)   | intergenic     |
| 3  | 110189919 | A | G | rs1512677              | 1.54E-06 | 0.155 | 0.102 | 0.62 | 0.49 | -0.78 | 7.72E-01 | 0.122 | 0.109 | 0.88 | 0.66 | -1.17 | 0.67 | 1.31E-04 | MIR4445(dist=868175), PVRL3-AS1(dist=574244)   | intergenic     |
| 7  | 153899034 | C | T | rs28665072             | 5.12E-05 | 0.151 | 0.104 | 1.54 | 1.22 | -1.95 | 3.01E-01 | 0.118 | 0.101 | 1.19 | 0.89 | -1.6  | 1.53 | 1.32E-04 | DPP6                                           | intronic       |
| 3  | 110191924 | A | G | rs970165               | 1.52E-06 | 0.155 | 0.102 | 0.62 | 0.49 | -0.78 | 7.75E-01 | 0.122 | 0.109 | 0.88 | 0.66 | -1.17 | 0.67 | 1.32E-04 | MIR4445(dist=870180), PVRL3-AS1(dist=572239)   | intergenic     |
| 5  | 122264932 | A | A | rs17149745             | 2.25E-05 | 0.156 | 0.103 | 1.62 | 1.28 | -2.04 | 2.79E-01 | 0.124 | 0.108 | 1.17 | 0.88 | -1.55 | 1.48 | 1.32E-04 | SNX24                                          | intronic       |
| 6  | 109743392 | A | T | rs9487098              | 2.45E-01 | 0.377 | 0.346 | 0.87 | 0.74 | -1.03 | 2.71E-06 | 0.477 | 0.387 | 0.69 | 0.57 | -0.83 | 0.76 | 1.33E-04 | PPIL6                                          | intronic       |
| 1  | 108225118 | T | C | rs2504454              | 6.46E-05 | 0.131 | 0.083 | 0.60 | 0.47 | -0.77 | 2.05E-01 | 0.123 | 0.107 | 0.85 | 0.64 | -1.14 | 0.65 | 1.33E-04 | VAV3                                           | intronic       |
| 5  | 122310761 | C | T | rs61165682             | 1.17E-05 | 0.181 | 0.123 | 1.58 | 1.27 | -1.96 | 3.52E-01 | 0.141 | 0.127 | 1.13 | 0.86 | -1.48 | 1.46 | 1.34E-04 | SNX24                                          | intronic       |
| 11 | 68050036  | G | A | rs431979               | 1.48E-01 | 0.166 | 0.139 | 1.24 | 0.99 | -1.55 | 5.48E-05 | 0.226 | 0.163 | 1.49 | 1.19 | -1.87 | 1.41 | 1.35E-04 | C11orf24(dist=10567), LRP5(dist=30041)         | intergenic     |
| 10 | 119107883 | C | T | rs17096145             | 4.33E-05 | 0.085 | 0.049 | 1.81 | 1.33 | -2.47 | 2.51E-01 | 0.056 | 0.045 | 1.25 | 0.83 | -1.89 | 1.79 | 1.35E-04 | PDZD8                                          | intronic       |
| 10 | 11813840  | G | T | rs10906012             | 3.61E-05 | 0.545 | 0.458 | 1.41 | 1.2  | -1.66 | 2.74E-01 | 0.494 | 0.470 | 1.10 | 0.91 | -1.33 | 1.30 | 1.35E-04 | ECHDC3(dist=7775), PROSER2(dist=51557)         | intergenic     |
| 20 | 8196673   | A | G | rs6118120              | 1.79E-01 | 0.047 | 0.036 | 1.31 | 0.88 | -1.94 | 2.18E-05 | 0.072 | 0.034 | 2.20 | 1.52 | -3.21 | 1.93 | 1.36E-04 | PLCB1                                          | intronic       |
| 10 | 119035346 | G | A | rs74466450             | 5.86E-05 | 0.084 | 0.049 | 1.79 | 1.31 | -2.44 | 2.10E-01 | 0.057 | 0.046 | 1.28 | 0.85 | -1.92 | 1.78 | 1.36E-04 | SLC18A2                                        | intronic       |
| 7  | 13357152  | T | C | rs115533894            | 1.94E-01 | 0.041 | 0.034 | 1.21 | 0.8  | -1.84 | 8.36E-06 | 0.067 | 0.029 | 2.37 | 1.61 | -3.5  | 2.04 | 1.38E-04 | ARL4A(dist=626594), ETV1(dist=573704)          | intergenic     |
| 6  | 32452626  | C | G | rs528864352            | 3.20E-05 | 0.204 | 0.267 | 0.70 | 0.58 | -0.86 | 1.59E-01 | 0.248 | 0.284 | 0.83 | 0.67 | -1.03 | 0.74 | 1.41E-04 | HLA-DRA(dist=39800), HLA-DRB5(dist=32528)      | intergenic     |
| 7  | 9087921   | C | T | rs10268725             | 6.19E-05 | 0.077 | 0.139 | 0.52 | 0.39 | -0.7  | 4.76E-01 | 0.091 | 0.096 | 0.94 | 0.68 | -1.3  | 0.66 | 1.42E-04 | NXPH1(dist=295328), PER4(dist=585979)          | intergenic     |
| 6  | 32469380  | C | T | rs78776915             | 9.80E-06 | 0.187 | 0.245 | 0.71 | 0.58 | -0.87 | 2.35E-01 | 0.247 | 0.275 | 0.86 | 0.7  | -1.07 | 0.70 | 1.43E-04 | HLA-DRA(dist=56554), HLA-DRB5(dist=15774)      | intergenic     |
| 6  | 32474310  | G | C | rs142827025            | 2.21E-05 | 0.204 | 0.264 | 0.71 | 0.59 | -0.87 | 1.89E-01 | 0.274 | 0.304 | 0.86 | 0.7  | -1.06 | 0.71 |          |                                                |                |

|    |           |   |   |                       |          |       |       |      |             |          |       |       |      |             |      |          |                                              |                |
|----|-----------|---|---|-----------------------|----------|-------|-------|------|-------------|----------|-------|-------|------|-------------|------|----------|----------------------------------------------|----------------|
| 7  | 13378676  | G | C | rs143633995           | 2.95E-01 | 0.032 | 0.027 | 1.19 | 0.75 - 1.9  | 3.53E-07 | 0.056 | 0.022 | 2.58 | 1.69 - 3.96 | 2.30 | 1.47E-04 | ARL4A(dist=648118), ETV1(dist=552180)        | intergenic     |
| 1  | 216249797 | T | C | rs138336852           | 1.77E-05 | 0.072 | 0.043 | 1.71 | 1.22 - 2.38 | 6.35E-01 | 0.036 | 0.032 | 1.14 | 0.69 - 1.88 | 2.18 | 1.48E-04 | LOC102723833                                 | ncRNA_intronic |
| 5  | 122358016 | A | T | rs386691898;rs6890625 | 1.28E-05 | 0.154 | 0.100 | 1.64 | 1.3 - 2.07  | 3.77E-01 | 0.114 | 0.101 | 1.15 | 0.86 - 1.55 | 1.49 | 1.48E-04 | SNX24(dist=13114), PPIC(dist=1062)           | intergenic     |
| 5  | 2873169   | C | A | rs115922410           | 1.61E-01 | 0.028 | 0.021 | 1.34 | 0.81 - 2.22 | 5.58E-07 | 0.044 | 0.021 | 2.18 | 1.36 - 3.49 | 2.78 | 1.48E-04 | C5orf38(dist=117658), LINC01377(dist=304780) | intergenic     |
| 6  | 32446261  | C | T | rs17209907            | 3.78E-05 | 0.172 | 0.232 | 0.69 | 0.55 - 0.85 | 1.58E-01 | 0.222 | 0.254 | 0.84 | 0.67 - 1.05 | 0.73 | 1.49E-04 | HLA-DRA(dist=33435), HLA-DRB5(dist=38893)    | intergenic     |
| 3  | 110200852 | A | C | rs386664553;rs1606377 | 1.64E-06 | 0.156 | 0.103 | 0.62 | 0.49 - 0.78 | 8.02E-01 | 0.122 | 0.109 | 0.88 | 0.66 - 1.18 | 0.67 | 1.49E-04 | MIR4445(dist=879108), PVRL3-AS1(dist=563311) | intergenic     |
| 13 | 43795569  | T | C | rs2120755             | 1.56E-01 | 0.183 | 0.171 | 0.92 | 0.74 - 1.14 | 4.58E-06 | 0.204 | 0.138 | 0.62 | 0.49 - 0.79 | 0.67 | 1.49E-04 | ENOX1                                        | intronic       |
| 6  | 32480593  | A | G | rs11543887            | 9.64E-06 | 0.171 | 0.228 | 0.70 | 0.56 - 0.86 | 2.87E-01 | 0.211 | 0.231 | 0.89 | 0.71 - 1.12 | 0.70 | 1.50E-04 | HLA-DRA(dist=67767), HLA-DRB5(dist=4561)     | intergenic     |
| 4  | 96534340  | G | T | rs113864970           | 1.15E-05 | 0.195 | 0.138 | 1.52 | 1.23 - 1.87 | 4.76E-01 | 0.152 | 0.136 | 1.14 | 0.88 - 1.48 | 1.41 | 1.50E-04 | UNC5C(dist=63979), PDHA2(dist=226899)        | intergenic     |
| 16 | 58148584  | G | A | rs35432967            | 3.37E-01 | 0.037 | 0.028 | 1.36 | 0.87 - 2.12 | 6.05E-06 | 0.087 | 0.053 | 1.70 | 1.21 - 2.38 | 2.03 | 1.51E-04 | CFAP20                                       | intronic       |
| 10 | 97237794  | A | G | rs998292              | 1.25E-05 | 0.374 | 0.463 | 1.44 | 1.22 - 1.7  | 3.85E-01 | 0.409 | 0.429 | 1.09 | 0.9 - 1.32  | 1.28 | 1.52E-04 | SORBS1                                       | intronic       |
| 6  | 32481851  | G | T | rs114232767           | 2.90E-05 | 0.380 | 0.318 | 0.76 | 0.64 - 0.9  | 1.81E-01 | 0.303 | 0.275 | 0.87 | 0.71 - 1.07 | 0.72 | 1.54E-04 | HLA-DRA(dist=69025), HLA-DRB5(dist=3303)     | intergenic     |
| 15 | 41714204  | C | T | rs115433825           | 4.19E-06 | 0.074 | 0.042 | 1.80 | 1.3 - 2.51  | 8.04E-01 | 0.037 | 0.034 | 1.12 | 0.68 - 1.83 | 1.98 | 1.55E-04 | RTF1                                         | intronic       |
| 16 | 82234820  | C | A | rs73595019            | 3.76E-05 | 0.090 | 0.055 | 1.69 | 1.25 - 2.28 | 3.23E-01 | 0.066 | 0.055 | 1.21 | 0.83 - 1.77 | 1.74 | 1.56E-04 | MPHOSPH6(dist=30991), CDH13(dist=425579)     | intergenic     |
| 6  | 32447873  | A | G | rs4994855             | 3.70E-06 | 0.186 | 0.257 | 0.66 | 0.54 - 0.81 | 3.64E-01 | 0.261 | 0.287 | 0.88 | 0.71 - 1.08 | 0.74 | 1.56E-04 | HLA-DRA(dist=35047), HLA-DRB5(dist=37281)    | intergenic     |
| 7  | 13355772  | C | T | rs116471327           | 1.96E-01 | 0.041 | 0.034 | 1.21 | 0.8 - 1.84  | 1.02E-05 | 0.067 | 0.030 | 2.35 | 1.59 - 3.47 | 2.03 | 1.58E-04 | ARL4A(dist=625214), ETV1(dist=575084)        | intergenic     |
| 6  | 32473744  | A | G | rs192414779           | 5.19E-05 | 0.230 | 0.290 | 0.73 | 0.61 - 0.89 | 1.51E-01 | 0.275 | 0.309 | 0.85 | 0.69 - 1.05 | 0.73 | 1.58E-04 | HLA-DRA(dist=60918), HLA-DRB5(dist=11410)    | intergenic     |
| 20 | 8201064   | T | A | rs57678397            | 2.89E-01 | 0.089 | 0.079 | 1.15 | 0.86 - 1.53 | 8.94E-06 | 0.133 | 0.075 | 1.90 | 1.43 - 2.52 | 1.60 | 1.58E-04 | PLCB1                                        | intronic       |
| 6  | 32590154  | T | C | rs9271546             | 3.28E-05 | 0.383 | 0.466 | 0.71 | 0.6 - 0.84  | 2.04E-01 | 0.420 | 0.455 | 0.87 | 0.72 - 1.05 | 0.78 | 1.58E-04 | HLA-DRB1(dist=32541), HLA-DQA1(dist=15029)   | intergenic     |
| 1  | 209202746 | G | A | rs12564514            | 1.07E-05 | 0.185 | 0.134 | 1.46 | 1.18 - 1.81 | 6.66E-01 | 0.122 | 0.111 | 1.11 | 0.84 - 1.48 | 1.51 | 1.58E-04 | PLXNA2(dist=785081), MIR205HG(dist=399422)   | intergenic     |
| 16 | 19487153  | G | T | rs79081807            | 2.55E-05 | 0.049 | 0.022 | 2.25 | 1.49 - 3.42 | 3.35E-01 | 0.033 | 0.026 | 1.24 | 0.73 - 2.11 | 2.36 | 1.58E-04 | TMCS                                         | intronic       |
| 6  | 32517150  | T | C | rs171536504           | 3.02E-05 | 0.310 | 0.251 | 0.75 | 0.63 - 0.89 | 1.72E-01 | 0.251 | 0.222 | 0.85 | 0.68 - 1.05 | 0.72 | 1.59E-04 | HLA-DRB5(dist=19144), HLA-DRB6(dist=3340)    | intergenic     |
| 21 | 19667255  | G | A | rs73210244            | 1.82E-01 | 0.044 | 0.034 | 1.32 | 0.88 - 1.98 | 2.92E-05 | 0.073 | 0.044 | 1.70 | 1.18 - 2.45 | 2.15 | 1.59E-04 | TMPPRS15                                     | intronic       |
| 17 | 40492039  | A | G | rs11870967            | 1.15E-01 | 0.092 | 0.077 | 1.21 | 0.91 - 1.61 | 3.07E-05 | 0.106 | 0.057 | 1.97 | 1.44 - 2.69 | 1.61 | 1.60E-04 | STAT3                                        | intronic       |
| 16 | 76981119  | A | G | rs28712764            | 2.34E-05 | 0.287 | 0.082 | 1.63 | 1.26 - 2.1  | 4.21E-01 | 0.092 | 0.079 | 1.17 | 0.85 - 1.62 | 1.57 | 1.60E-04 | MIR4719(dist=78203), MON1B(dist=243697)      | intergenic     |
| 6  | 32447900  | T | C | rs4994854             | 3.87E-06 | 0.186 | 0.256 | 0.66 | 0.54 - 0.81 | 3.63E-01 | 0.261 | 0.287 | 0.88 | 0.71 - 1.08 | 0.74 | 1.60E-04 | HLA-DRA(dist=35074), HLA-DRB5(dist=37254)    | intergenic     |
| 3  | 110208638 | G | T | rs1949180             | 9.15E-07 | 0.126 | 0.077 | 0.57 | 0.44 - 0.74 | 9.62E-01 | 0.087 | 0.080 | 0.90 | 0.65 - 1.26 | 0.64 | 1.62E-04 | MIR4445(dist=886894), PVRL3-AS1(dist=555525) | intergenic     |
| 7  | 13355310  | T | G | rs77445107            | 1.96E-01 | 0.041 | 0.034 | 1.21 | 0.79 - 1.84 | 1.08E-05 | 0.067 | 0.030 | 2.34 | 1.58 - 3.46 | 2.03 | 1.64E-04 | ARL4A(dist=624752), ETV1(dist=575546)        | intergenic     |
| 17 | 40489758  | A | T | rs12721583            | 1.18E-01 | 0.091 | 0.077 | 1.21 | 0.91 - 1.61 | 3.05E-05 | 0.106 | 0.057 | 1.97 | 1.44 - 2.69 | 1.61 | 1.65E-04 | STAT3                                        | intronic       |
| 7  | 13354236  | G | C | rs140364479           | 1.99E-01 | 0.041 | 0.034 | 1.21 | 0.79 - 1.83 | 1.04E-05 | 0.066 | 0.030 | 2.34 | 1.58 - 3.46 | 2.03 | 1.66E-04 | ARL4A(dist=623678), ETV1(dist=576620)        | intergenic     |
| 6  | 32481849  | A | T | rs148513611           | 4.06E-05 | 0.351 | 0.289 | 0.75 | 0.64 - 0.9  | 1.62E-01 | 0.295 | 0.267 | 0.87 | 0.71 - 1.07 | 0.72 | 1.66E-04 | HLA-DRA(dist=69023), HLA-DRB5(dist=3305)     | intergenic     |
| 6  | 32449188  | G | A | rs9394100             | 1.57E-05 | 0.279 | 0.348 | 0.72 | 0.6 - 0.87  | 2.42E-01 | 0.325 | 0.356 | 0.87 | 0.71 - 1.06 | 0.74 | 1.68E-04 | HLA-DRA(dist=36362), HLA-DRB5(dist=35966)    | intergenic     |
| 2  | 44789691  | A | T | rs2341460             | 6.84E-01 | 0.036 | 0.027 | 0.74 | 0.47 - 1.16 | 1.59E-07 | 0.092 | 0.054 | 0.57 | 0.41 - 0.79 | 0.47 | 1.68E-04 | CAMKMT                                       | intronic       |
| 20 | 8135244   | A | G | rs6055579             | 2.55E-01 | 0.047 | 0.037 | 1.27 | 0.85 - 1.88 | 1.41E-06 | 0.067 | 0.031 | 2.24 | 1.52 - 3.29 | 1.98 | 1.69E-04 | PLCB1                                        | intronic       |
| 16 | 58140687  | G | A | rs34687030            | 4.50E-01 | 0.034 | 0.026 | 1.32 | 0.83 - 2.09 | 2.39E-06 | 0.083 | 0.050 | 1.71 | 1.21 - 2.42 | 2.11 | 1.71E-04 | MMP15(dist=59883), CFAP20(dist=6810)         | intergenic     |
| 6  | 32449411  | T | C | rs1964995             | 8.96E-06 | 0.194 | 0.262 | 0.68 | 0.55 - 0.83 | 3.21E-01 | 0.243 | 0.269 | 0.87 | 0.7 - 1.08  | 0.74 | 1.71E-04 | HLA-DRA(dist=36585), HLA-DRB5(dist=35743)    | intergenic     |
| 21 | 19662901  | G | T | rs73210223            | 1.71E-01 | 0.038 | 0.028 | 1.36 | 0.88 - 2.11 | 5.27E-05 | 0.078 | 0.048 | 1.69 | 1.18 - 2.41 | 2.07 | 1.71E-04 | TMPPRS15                                     | intronic       |
| 16 | 76980754  | A | G | rs13337842            | 2.61E-05 | 0.128 | 0.083 | 1.63 | 1.26 - 2.1  | 4.20E-01 | 0.092 | 0.079 | 1.17 | 0.85 - 1.63 | 1.56 | 1.72E-04 | MIR4719(dist=77838), MON1B(dist=244062)      | intergenic     |
| 1  | 152176848 | C | A | rs11204934;rs71585887 | 2.52E-06 | 0.184 | 0.177 | 1.69 | 1.36 - 2.1  | 7.43E-01 | 0.137 | 0.131 | 1.05 | 0.8 - 1.38  | 1.44 | 1.75E-04 | RPTN(dist=45144), HRNR(dist=7704)            | intergenic     |
| 10 | 43986642  | A | G | rs3124212             | 1.02E-06 | 0.128 | 0.066 | 0.56 | 0.43 - 0.73 | 7.14E-01 | 0.102 | 0.096 | 0.94 | 0.69 - 1.28 | 0.63 | 1.76E-04 | ZNF487(dist=8635), ZNF239(dist=65151)        | intergenic     |
| 1  | 152176539 | G | A | rs11589532            | 2.52E-06 | 0.184 | 0.117 | 1.69 | 1.36 - 2.1  | 7.51E-01 | 0.137 | 0.131 | 1.05 | 0.8 - 1.38  | 1.44 | 1.79E-04 | RPTN(dist=44835), HRNR(dist=8013)            | intergenic     |
| 3  | 110298901 | G | A | rs9855229             | 1.42E-05 | 0.071 | 0.039 | 1.85 | 1.32 - 2.6  | 5.04E-01 | 0.046 | 0.036 | 1.29 | 0.82 - 2.02 | 1.88 | 1.81E-04 | MIR4445(dist=977157), PVRL3-AS1(dist=465262) | intergenic     |
| 4  | 96534560  | G | C | rs17024254            | 1.14E-05 | 0.195 | 0.138 | 1.52 | 1.23 - 1.87 | 5.22E-01 | 0.151 | 0.136 | 1.13 | 0.87 - 1.47 | 1.41 | 1.81E-04 | UNC5C(dist=64199), PDHA2(dist=226679)        | intergenic     |
| 16 | 76980324  | G | T | rs112656138           | 2.82E-05 | 0.128 | 0.083 | 1.62 | 1.26 - 2.09 | 4.21E-01 | 0.092 | 0.079 | 1.17 | 0.85 - 1.63 | 1.56 | 1.81E-04 | MIR4719(dist=77408), MON1B(dist=244492)      | intergenic     |
| 5  | 122095810 | A | T | rs115586455           | 1.27E-05 | 0.156 | 0.102 | 1.62 | 1.29 - 2.05 | 4.02E-01 | 0.126 | 0.113 | 1.13 | 0.85 - 1.5  | 1.48 | 1.81E-04 | LOC101927379(dist=29555), SNX2(dist=14881)   | intergenic     |
| 4  | 96534626  | T | C | rs72880008            | 1.13E-05 | 0.195 | 0.138 | 1.52 | 1.23 - 1.87 | 5.22E-01 | 0.151 | 0.136 | 1.13 | 0.87 - 1.47 | 1.41 | 1.81E-04 | UNC5C(dist=64265), PDHA2(dist=226613)        | intergenic     |
| 1  | 152185750 | G | A | rs12729662            | 2.66E-06 | 0.187 | 0.120 | 1.68 | 1.36 - 2.09 | 7.45E-01 | 0.138 | 0.132 | 1.05 | 0.8 - 1.38  | 1.44 | 1.82E-04 | HRNR                                         | exonic         |
| 5  | 122341952 | A | G | rs7734954             | 3.02E-05 | 0.157 | 0.104 | 1.60 | 1.27 - 2.02 | 2.92E-01 | 0.124 | 0.108 | 1.17 | 0.88 - 1.55 | 1.47 | 1.83E-04 | SNX24                                        | intronic       |
| 19 | 52489741  | T | C | rs17695888            | 2.63E-01 | 0.042 | 0.032 | 1.33 | 0.88 - 2.02 | 3.62E-06 | 0.065 | 0.031 | 2.14 | 1.45 - 3.17 | 2.02 | 1.83E-04 | ZNF350                                       | intronic       |
| 16 | 76928330  | A | T | rs9924825;rs563061881 | 3.60E-05 | 0.122 | 0.079 | 1.64 | 1.26 - 2.12 | 3.41E-01 | 0.094 | 0.079 | 1.21 | 0.87 - 1.66 | 1.56 | 1.83E-04 | MIR4719(dist=25414), MON1B(dist=296486)      | intergenic     |
| 11 | 83697180  | C | A | rs180703978           | 2.50E-01 | 0.029 | 0.023 | 1.30 | 0.79 - 2.13 | 2.78E-05 | 0.052 | 0.025 | 2.12 | 1.37 - 3.28 | 2.53 | 1.84E-04 | DLC2                                         | intronic       |
| 6  | 32510279  | A | C | rs28838605            | 3.46E-05 | 0.248 | 0.310 | 0.73 | 0.61 - 0.88 | 1.98E-01 | 0.275 | 0.308 | 0.85 | 0.69 - 1.05 | 0.73 | 1.85E-04 | HLA-DRB5(dist=12273), HLA-DRB6(dist=10211)   | intergenic     |
| 16 | 76933100  | G | A | rs1496962             | 4.67E-05 | 0.115 | 0.074 | 1.63 | 1.25 - 2.13 | 3.49E-01 | 0.083 | 0.070 | 1.21 | 0.86 - 1.7  | 1.59 | 1.85E-04 | MIR4719(dist=30184), MON1B(dist=291716)      | intergenic     |
| 3  | 110209297 | A | G | rs114321891           | 1.04E-05 | 0.069 | 0.037 | 1.93 | 1.36 - 2.72 | 5.47E-01 | 0.045 | 0.036 | 1.28 | 0.82 - 2.02 | 1.87 | 1.85E-04 | MIR4445(dist=887553), PVRL3-AS1(dist=554866) | intergenic     |
| 15 | 66877711  | C | T | rs144814270           | 5.47E-06 | 0.064 | 0.032 | 2.05 | 1.43 - 2.94 | 7.43E-01 | 0.042 | 0.038 | 1.11 | 0.7 - 1.77  | 2.02 | 1.85E-04 | LINC01169                                    | ncRNA_intronic |
| 3  | 110205244 | G | C | rs9834831             | 1.04E-05 | 0.068 | 0.037 | 1.93 | 1.37 - 2.73 | 5.46E-01 | 0.045 | 0.036 | 1.28 | 0.82 - 2.02 | 1.87 | 1.85E-04 | MIR4445(dist=883500), PVRL3-AS1(dist=558919) | intergenic     |
| 11 | 126017534 | G | A | rs628643              | 3.71E-05 | 0.313 | 0.235 | 1.48 | 1.24 - 1.77 | 4.22E-01 | 0.247 | 0.243 | 1.03 | 0.83 - 1.28 | 1.34 | 1.86E-04 | CDON(dist=84347), RPU5D4(dist=54455)         | intergenic     |
| 3  | 110206782 | A | G | rs9878382             | 1.05E-05 | 0.068 | 0.037 | 1.93 | 1.36 - 2.72 |          |       |       |      |             |      |          |                                              |                |

|    |           |   |   |                      |          |       |       |      |      |       |          |       |       |      |      |       |      |          |                                               |            |
|----|-----------|---|---|----------------------|----------|-------|-------|------|------|-------|----------|-------|-------|------|------|-------|------|----------|-----------------------------------------------|------------|
| 16 | 76927590  | T | C | rs1603514            | 3.91E-05 | 0.122 | 0.079 | 1.63 | 1.26 | -2.12 | 3.40E-01 | 0.094 | 0.079 | 1.21 | 0.87 | -1.66 | 1.55 | 1.94E-04 | MIR4719(dist=24674), MON1B(dist=297226)       | intergenic |
| 5  | 122217367 | T | A | rs59480442           | 1.75E-05 | 0.158 | 0.103 | 1.63 | 1.29 | -2.05 | 3.83E-01 | 0.124 | 0.110 | 1.14 | 0.86 | -1.51 | 1.47 | 1.94E-04 | SNX24                                         | intronic   |
| 3  | 110249684 | G | A | rs1512664            | 6.59E-07 | 0.136 | 0.084 | 0.58 | 0.45 | -0.75 | 9.17E-01 | 0.091 | 0.085 | 0.93 | 0.67 | -1.28 | 0.65 | 1.94E-04 | MIR4445(dist=927940), PVRL3-AS1(dist=514479)  | intergenic |
| 10 | 119157290 | C | A | rs114624576          | 3.76E-05 | 0.084 | 0.047 | 1.84 | 1.34 | -2.51 | 3.45E-01 | 0.054 | 0.046 | 1.20 | 0.79 | -1.82 | 1.77 | 1.94E-04 | PDZD8(dist=22312), EMX2OS(dist=86514)         | intergenic |
| 16 | 58208832  | C | T | rs2550355            | 2.66E-01 | 0.039 | 0.028 | 1.40 | 0.91 | -2.17 | 3.06E-05 | 0.090 | 0.056 | 1.67 | 1.2  | -2.33 | 1.92 | 1.95E-04 | CSNK2A2                                       | intronic   |
| 2  | 143451538 | C | T | rs2169217            | 1.73E-01 | 0.147 | 0.115 | 1.32 | 1.04 | -1.67 | 1.87E-05 | 0.206 | 0.158 | 1.38 | 1.09 | -1.74 | 1.48 | 1.95E-04 | LRP1B(dist=562268), KYNPU(dist=183657)        | intergenic |
| 4  | 96536173  | C | A | rs72880018           | 1.19E-05 | 0.195 | 0.138 | 1.52 | 1.23 | -1.87 | 5.35E-01 | 0.151 | 0.136 | 1.13 | 0.87 | -1.46 | 1.40 | 1.95E-04 | UNC5C(dist=65812), PDHA2(dist=225066)         | intergenic |
| 4  | 96536296  | A | G | rs72880019           | 1.19E-05 | 0.195 | 0.138 | 1.52 | 1.23 | -1.87 | 5.36E-01 | 0.151 | 0.136 | 1.13 | 0.87 | -1.46 | 1.40 | 1.97E-04 | UNC5C(dist=65935), PDHA2(dist=224943)         | intergenic |
| 4  | 96531994  | G | A | rs114205335          | 1.27E-05 | 0.195 | 0.139 | 1.51 | 1.22 | -1.87 | 5.26E-01 | 0.152 | 0.137 | 1.13 | 0.87 | -1.46 | 1.40 | 1.97E-04 | UNC5C(dist=61633), PDHA2(dist=229245)         | intergenic |
| 18 | 66466619  | A | G | rs9967207            | 4.31E-05 | 0.063 | 0.037 | 1.75 | 1.23 | -2.49 | 2.88E-01 | 0.050 | 0.041 | 1.24 | 0.81 | -1.91 | 1.98 | 1.97E-04 | CCDC102B                                      | intronic   |
| 6  | 109742460 | C | T | rs72545661,rs9885646 | 1.93E-01 | 0.410 | 0.377 | 0.87 | 0.74 | -1.03 | 1.05E-05 | 0.497 | 0.406 | 0.69 | 0.57 | -0.83 | 0.78 | 1.98E-04 | PP1L6                                         | intronic   |
| 1  | 112389980 | G | C | rs525255             | 1.42E-01 | 0.154 | 0.134 | 1.18 | 0.94 | -1.48 | 4.80E-05 | 0.208 | 0.146 | 1.54 | 1.22 | -1.94 | 1.43 | 1.98E-04 | KCNND3                                        | intronic   |
| 10 | 119159934 | A | G | rs76522692           | 3.91E-05 | 0.084 | 0.047 | 1.83 | 1.34 | -2.51 | 3.43E-01 | 0.054 | 0.046 | 1.20 | 0.79 | -1.82 | 1.77 | 1.98E-04 | PDZD8(dist=24956), EMX2OS(dist=83870)         | intergenic |
| 6  | 152125444 | T | C | rs488133             | 2.32E-01 | 0.085 | 0.064 | 0.73 | 0.54 | -0.99 | 3.53E-06 | 0.124 | 0.087 | 0.68 | 0.51 | -0.9  | 0.58 | 1.99E-04 | ESR1                                          | intronic   |
| 11 | 22537092  | T | C | rs73479637           | 2.46E-01 | 0.105 | 0.100 | 1.05 | 0.8  | -1.37 | 1.25E-05 | 0.132 | 0.084 | 1.66 | 1.26 | -2.2  | 1.71 | 2.00E-04 | LINC01495(dist=23527), FANCF(dist=106987)     | intergenic |
| 10 | 119161220 | A | T | rs74350818           | 3.97E-05 | 0.083 | 0.047 | 1.83 | 1.34 | -2.5  | 3.43E-01 | 0.054 | 0.045 | 1.20 | 0.79 | -1.82 | 1.77 | 2.01E-04 | PDZD8(dist=26242), EMX2OS(dist=82584)         | intergenic |
| 5  | 122214337 | A | G | rs61389521           | 1.90E-05 | 0.158 | 0.103 | 1.62 | 1.29 | -2.05 | 3.81E-01 | 0.124 | 0.110 | 1.14 | 0.86 | -1.51 | 1.47 | 2.02E-04 | SNX24                                         | intronic   |
| 3  | 110230474 | C | A | rs9836341            | 9.82E-06 | 0.069 | 0.037 | 1.92 | 1.36 | -2.71 | 5.68E-01 | 0.046 | 0.037 | 1.27 | 0.81 | -1.99 | 1.86 | 2.03E-04 | MIR4445(dist=908730), PVRL3-AS1(dist=533689)  | intergenic |
| 16 | 58210887  | G | A | rs2731747            | 2.70E-01 | 0.039 | 0.028 | 1.40 | 0.9  | -2.16 | 3.12E-05 | 0.090 | 0.056 | 1.67 | 1.19 | -2.33 | 1.92 | 2.03E-04 | CSNK2A2                                       | intronic   |
| 16 | 76927016  | T | G | rs13337592           | 4.23E-05 | 0.122 | 0.079 | 1.63 | 1.26 | -2.11 | 3.40E-01 | 0.094 | 0.079 | 1.21 | 0.87 | -1.66 | 1.55 | 2.04E-04 | MIR4719(dist=24100), MON1B(dist=297800)       | intergenic |
| 12 | 54093041  | G | A | rs71455256           | 2.08E-01 | 0.040 | 0.029 | 1.40 | 0.91 | -2.15 | 1.94E-05 | 0.070 | 0.045 | 1.60 | 1.1  | -2.33 | 2.08 | 2.04E-04 | ATP5G2(dist=22529), CALCOCO1(dist=11861)      | intergenic |
| 11 | 68014416  | T | C | rs10791966           | 2.56E-01 | 0.159 | 0.135 | 1.21 | 0.97 | -1.52 | 2.19E-05 | 0.231 | 0.167 | 1.50 | 1.2  | -1.88 | 1.40 | 2.04E-04 | SUV420H1(dist=33177), C11orf24(dist=14387)    | intergenic |
| 7  | 41275654  | G | T | rs73687969           | 1.24E-01 | 0.102 | 0.088 | 1.17 | 0.89 | -1.54 | 3.36E-05 | 0.130 | 0.079 | 1.73 | 1.31 | -2.3  | 1.58 | 2.04E-04 | LINC01449(dist=102555), INHBA(dist=452947)    | intergenic |
| 11 | 68015436  | G | C | rs2375472            | 2.56E-01 | 0.160 | 0.136 | 1.21 | 0.97 | -1.52 | 2.22E-05 | 0.231 | 0.167 | 1.50 | 1.2  | -1.88 | 1.40 | 2.05E-04 | SUV420H1(dist=34197), C11orf24(dist=13367)    | intergenic |
| 6  | 31080016  | C | G | rs2233974            | 1.17E-01 | 0.122 | 0.145 | 0.82 | 0.64 | -1.04 | 4.48E-05 | 0.078 | 0.146 | 1.50 | 0.35 | -0.7  | 0.70 | 2.05E-04 | C6orf15                                       | exonic     |
| 3  | 110232454 | A | G | rs9809437            | 9.93E-06 | 0.069 | 0.037 | 1.92 | 1.36 | -2.71 | 5.70E-01 | 0.046 | 0.037 | 1.27 | 0.81 | -1.99 | 1.86 | 2.06E-04 | MIR4445(dist=910710), PVRL3-AS1(dist=531709)  | intergenic |
| 3  | 110231916 | T | A | rs114631428          | 9.93E-06 | 0.069 | 0.037 | 1.92 | 1.36 | -2.71 | 5.70E-01 | 0.046 | 0.037 | 1.27 | 0.81 | -1.99 | 1.86 | 2.06E-04 | MIR4445(dist=910172), PVRL3-AS1(dist=532247)  | intergenic |
| 6  | 32452602  | C | T | rs561623787          | 3.24E-05 | 0.209 | 0.272 | 0.71 | 0.58 | -0.86 | 2.03E-01 | 0.263 | 0.296 | 0.85 | 0.69 | -1.05 | 0.74 | 2.06E-04 | HLA-DRA(dist=39776), HLA-DRB5(dist=32552)     | intergenic |
| 10 | 113628907 | T | G | rs112931518          | 1.09E-01 | 0.036 | 0.028 | 1.28 | 0.82 | -2    | 2.73E-05 | 0.051 | 0.025 | 1.12 | 1.37 | -3.29 | 2.36 | 2.07E-04 | ADRA2A(dist=788245), GPAM(dist=280715)        | intergenic |
| 10 | 119133044 | G | A | rs142859710          | 3.58E-05 | 0.083 | 0.047 | 1.84 | 1.35 | -2.52 | 3.38E-01 | 0.053 | 0.045 | 1.20 | 0.79 | -1.83 | 1.76 | 2.07E-04 | PDZD8                                         | intronic   |
| 9  | 91337035  | T | C | rs7042278            | 2.99E-01 | 0.191 | 0.167 | 0.85 | 0.69 | -1.04 | 2.86E-06 | 0.251 | 0.187 | 0.69 | 0.55 | -0.85 | 0.70 | 2.07E-04 | LOC286238(dist=69960), MIR4289(dist=23716)    | intergenic |
| 2  | 47632189  | T | C | rs140879262          | 3.12E-05 | 0.052 | 0.028 | 1.94 | 1.31 | -2.87 | 4.26E-01 | 0.036 | 0.030 | 1.23 | 0.74 | -2.03 | 2.25 | 2.08E-04 | MSH2                                          | intronic   |
| 3  | 110203541 | C | T | rs9878940            | 1.21E-05 | 0.068 | 0.036 | 1.93 | 1.36 | -2.73 | 5.46E-01 | 0.045 | 0.036 | 1.29 | 0.82 | -2.02 | 1.87 | 2.09E-04 | MIR4445(dist=881797), PVRL3-AS1(dist=560622)  | intergenic |
| 17 | 40476538  | C | T | rs17881621           | 3.44E-01 | 0.108 | 0.100 | 1.09 | 0.84 | -1.42 | 1.93E-06 | 0.139 | 0.078 | 1.90 | 1.44 | -2.51 | 1.53 | 2.10E-04 | STAT3                                         | intronic   |
| 9  | 89351093  | T | C | rs10046800           | 4.44E-05 | 0.345 | 0.261 | 1.49 | 1.25 | -1.78 | 3.40E-01 | 0.330 | 0.323 | 1.03 | 0.84 | -1.25 | 1.31 | 2.11E-04 | ZCCHC6(dist=381691), GAS1(dist=208184)        | intergenic |
| 10 | 110353070 | T | A | rs12415860           | 1.94E-01 | 0.180 | 0.163 | 1.12 | 0.91 | -1.39 | 1.06E-05 | 0.237 | 0.174 | 1.47 | 1.18 | -1.84 | 1.48 | 2.11E-04 | LINC01435(dist=524019), RNU6-53P(dist=577345) | intergenic |
| 10 | 119129340 | C | A | rs76902317           | 3.64E-05 | 0.083 | 0.047 | 1.84 | 1.35 | -2.52 | 3.60E-01 | 0.053 | 0.045 | 1.20 | 0.79 | -1.83 | 1.76 | 2.12E-04 | PDZD8                                         | intronic   |
| 20 | 8130279   | A | C | rs6039052            | 2.72E-01 | 0.047 | 0.038 | 1.26 | 0.85 | -1.86 | 1.68E-06 | 0.067 | 0.031 | 2.23 | 1.51 | -3.28 | 1.96 | 2.12E-04 | PLCB1                                         | intronic   |
| 7  | 22014475  | C | G | rs28564359           | 2.96E-01 | 0.052 | 0.044 | 1.19 | 0.82 | -1.73 | 6.84E-07 | 0.076 | 0.036 | 2.19 | 1.52 | -3.16 | 1.91 | 2.13E-04 | CDC47L(dist=28933), RAPGEF5(dist=143433)      | intergenic |
| 1  | 152936749 | A | G | rs6675352            | 8.85E-06 | 0.283 | 0.203 | 0.65 | 0.54 | -0.78 | 5.48E-01 | 0.220 | 0.215 | 0.97 | 0.78 | -1.22 | 0.74 | 2.13E-04 | IVL(dist=52387), SPRR4(dist=6380)             | intergenic |
| 5  | 122191182 | T | G | rs72796838           | 2.62E-05 | 0.154 | 0.101 | 1.61 | 1.27 | -2.04 | 3.48E-01 | 0.123 | 0.109 | 1.15 | 0.87 | -1.53 | 1.47 | 2.14E-04 | SNX24                                         | intronic   |
| 6  | 32457061  | C | G | rs77921068           | 3.64E-05 | 0.291 | 0.351 | 0.76 | 0.63 | -0.9  | 2.01E-01 | 0.383 | 0.415 | 0.88 | 0.72 | -1.06 | 0.73 | 2.16E-04 | HLA-DRA(dist=44235), HLA-DRB5(dist=28093)     | intergenic |
| 20 | 54402729  | C | T | rs6098836            | 6.34E-05 | 0.263 | 0.187 | 1.55 | 1.28 | -1.88 | 2.54E-01 | 0.241 | 0.229 | 1.07 | 0.86 | -1.33 | 1.35 | 2.16E-04 | LINC01441(dist=358994), CBLN4(dist=169684)    | intergenic |
| 15 | 41679307  | C | T | rs147062425          | 1.28E-05 | 0.083 | 0.051 | 1.68 | 1.24 | -2.3  | 7.58E-01 | 0.043 | 0.039 | 1.11 | 0.7  | -1.77 | 1.86 | 2.16E-04 | NDUF4F1                                       | downstream |
| 3  | 110300317 | G | A | rs116047439          | 2.35E-05 | 0.072 | 0.041 | 1.83 | 1.31 | -2.56 | 4.89E-01 | 0.047 | 0.037 | 1.29 | 0.82 | -2.02 | 1.84 | 2.17E-04 | MIR4445(dist=978573), PVRL3-AS1(dist=463846)  | intergenic |
| 6  | 42084516  | T | C | rs9462772            | 5.70E-05 | 0.353 | 0.419 | 1.32 | 1.11 | -1.56 | 2.88E-01 | 0.402 | 0.430 | 1.12 | 0.93 | -1.36 | 1.35 | 2.21E-04 | C6orf132                                      | intronic   |
| 5  | 122351665 | A | G | rs55943014           | 3.94E-05 | 0.174 | 0.119 | 1.55 | 1.24 | -1.94 | 3.00E-01 | 0.143 | 0.126 | 1.16 | 0.88 | -1.51 | 1.44 | 2.21E-04 | SNX24(dist=6763), PPIC(dist=7413)             | intergenic |
| 1  | 158519710 | T | C | rs10797026           | 4.17E-05 | 0.437 | 0.347 | 0.68 | 0.58 | -0.81 | 3.26E-01 | 0.395 | 0.378 | 0.93 | 0.77 | -1.13 | 0.78 | 2.21E-04 | OR6Y1(dist=1815), OR6P1(dist=12731)           | intergenic |
| 4  | 125864672 | G | A | rs2170742            | 5.12E-05 | 0.338 | 0.259 | 1.47 | 1.23 | -1.75 | 3.80E-01 | 0.319 | 0.314 | 1.03 | 0.84 | -1.25 | 1.34 | 2.22E-04 | ANKRD50(dist=230785), FAT4(dist=372895)       | intergenic |
| 11 | 68046962  | C | G | rs453262             | 1.89E-01 | 0.164 | 0.138 | 1.23 | 0.98 | -1.53 | 6.45E-05 | 0.225 | 0.163 | 1.49 | 1.19 | -1.87 | 1.39 | 2.22E-04 | C11orf24(dist=7493), LRP5(dist=33115)         | intergenic |
| 5  | 122205645 | G | A | rs59410349           | 2.40E-05 | 0.155 | 0.102 | 1.61 | 1.28 | -2.04 | 3.63E-01 | 0.124 | 0.110 | 1.14 | 0.86 | -1.52 | 1.47 | 2.23E-04 | SNX24                                         | intronic   |
| 9  | 24742594  | T | A | rs141897495          | 2.66E-05 | 0.062 | 0.034 | 1.88 | 1.31 | -2.7  | 4.04E-01 | 0.049 | 0.040 | 1.21 | 0.78 | -1.87 | 2.05 | 2.23E-04 | IZUMO3(dist=196920), TUSC1(dist=933793)       | intergenic |
| 15 | 91725620  | C | T | rs76438353           | 2.59E-06 | 0.072 | 0.038 | 1.97 | 1.41 | -2.77 | 7.47E-01 | 0.033 | 0.033 | 0.98 | 0.58 | -1.66 | 2.00 | 2.24E-04 | SV2B                                          | intronic   |
| 3  | 110243528 | G | T | rs28836839           | 1.30E-05 | 0.070 | 0.038 | 1.89 | 1.34 | -2.66 | 5.57E-01 | 0.046 | 0.037 | 1.27 | 0.81 | -1.99 | 1.85 | 2.25E-04 | MIR4445(dist=921784), PVRL3-AS1(dist=520635)  | intergenic |
| 16 | 51491597  | T | C | rs16949809           | 2.72E-05 | 0.167 | 0.116 | 1.54 | 1.23 | -1.92 | 6.64E-01 | 0.113 | 0.104 | 1.09 | 0.81 | -1.46 | 1.51 | 2.26E-04 | SALL1(dist=306414), LINC01571(dist=304833)    | intergenic |
| 17 | 65246476  | A | G | rs113299812          | 4.42E-01 | 0.032 | 0.028 | 1.14 | 0.71 | -1.83 | 8.51E-07 | 0.060 | 0.025 | 2.46 | 1.63 | -3.72 | 2.23 | 2.27E-04 | HELZ(dist=5157), PSMD12(dist=90143)           | intergenic |
| 15 | 91726499  |   |   |                      |          |       |       |      |      |       |          |       |       |      |      |       |      |          |                                               |            |

|    |           |   |   |                       |          |       |       |      |      |       |          |       |       |      |      |       |      |          |                                                     |                |
|----|-----------|---|---|-----------------------|----------|-------|-------|------|------|-------|----------|-------|-------|------|------|-------|------|----------|-----------------------------------------------------|----------------|
| 16 | 58202089  | T | C | rs16959755            | 3.08E-01 | 0.040 | 0.030 | 1.36 | 0.89 | -2.08 | 2.57E-05 | 0.091 | 0.057 | 1.66 | 1.19 | -2.31 | 1.90 | 2.42E-04 | CSNK2A2                                             | intronic       |
| 16 | 58212143  | T | C | rs27317448            | 2.92E-01 | 0.040 | 0.029 | 1.38 | 0.89 | -2.12 | 3.25E-05 | 0.090 | 0.056 | 1.66 | 1.19 | -2.32 | 1.90 | 2.42E-04 | CSNK2A2                                             | intronic       |
| 6  | 32482990  | C | T | rs112281380           | 2.21E-05 | 0.345 | 0.444 | 0.75 | 0.63 | -0.88 | 3.01E-01 | 0.456 | 0.480 | 0.91 | 0.75 | -1.09 | 0.74 | 2.46E-04 | HLA-DRA(dist=70164), HLA-DRB5(dist=2164)            | intergenic     |
| 6  | 109737703 | G | A | rs9480951             | 2.20E-01 | 0.376 | 0.314 | 0.87 | 0.73 | -1.03 | 1.19E-05 | 0.468 | 0.383 | 0.71 | 0.58 | -0.85 | 0.77 | 2.46E-04 | PPLI6                                               | intronic       |
| 16 | 58199203  | G | T | rs2242445             | 3.13E-01 | 0.040 | 0.029 | 1.37 | 0.9  | -2.11 | 2.66E-05 | 0.090 | 0.056 | 1.67 | 1.2  | -2.33 | 1.91 | 2.47E-04 | CSNK2A2                                             | intronic       |
| 4  | 190058219 | T | C | rs72642052            | 1.50E-01 | 0.064 | 0.052 | 1.23 | 0.88 | -1.73 | 5.20E-05 | 0.097 | 0.058 | 1.72 | 1.25 | -2.38 | 1.82 | 2.48E-04 | LINC01060(dist=535157), LINC01262(dist=522541)      | intergenic     |
| 5  | 122158903 | A | C | rs7734793             | 3.10E-05 | 0.156 | 0.104 | 1.60 | 1.27 | -2.01 | 3.49E-01 | 0.128 | 0.114 | 1.15 | 0.87 | -1.52 | 1.46 | 2.50E-04 | SNX2                                                | intronic       |
| 6  | 109736326 | C | T | rs35056702            | 3.00E-01 | 0.352 | 0.323 | 0.88 | 0.74 | -1.04 | 4.42E-06 | 0.448 | 0.359 | 0.69 | 0.57 | -0.83 | 0.77 | 2.50E-04 | PPLI6                                               | intronic       |
| 7  | 86906632  | G | A | rs802105              | 1.59E-05 | 0.364 | 0.288 | 1.41 | 1.19 | -1.68 | 6.26E-01 | 0.288 | 0.274 | 1.07 | 0.87 | -1.32 | 1.30 | 2.51E-04 | TMEM243(dist=57601), TP53TG1(dist=48032)            | intergenic     |
| 3  | 110165006 | T | C | rs114555199           | 2.53E-05 | 0.066 | 0.036 | 1.90 | 1.33 | -2.7  | 4.55E-01 | 0.047 | 0.035 | 1.33 | 0.85 | -2.08 | 1.85 | 2.51E-04 | MIR4445(dist=843262), PVRL3-AS1(dist=599157)        | intergenic     |
| 17 | 75572789  | A | G | rs16970304            | 1.94E-05 | 0.043 | 0.085 | 0.49 | 0.33 | -0.71 | 5.86E-01 | 0.072 | 0.079 | 0.91 | 0.63 | -1.3  | 0.63 | 2.51E-04 | LOC100507351(dist=11686), LOC100132174(dist=146165) | intergenic     |
| 15 | 91731925  | A | T | rs8031181             | 4.21E-06 | 0.071 | 0.037 | 1.97 | 1.4  | -2.77 | 8.13E-01 | 0.033 | 0.033 | 1.00 | 0.59 | -1.68 | 1.99 | 2.52E-04 | SV2B                                                | intronic       |
| 3  | 110201876 | C | T | rs9872591             | 1.64E-05 | 0.067 | 0.036 | 1.92 | 1.35 | -2.72 | 5.46E-01 | 0.045 | 0.036 | 1.29 | 0.82 | -2.02 | 1.85 | 2.52E-04 | MIR4445(dist=880132), PVRL3-AS1(dist=562287)        | intergenic     |
| 5  | 122126925 | T | C | rs59044296            | 1.72E-05 | 0.156 | 0.102 | 1.63 | 1.29 | -2.06 | 4.36E-01 | 0.126 | 0.114 | 1.12 | 0.84 | -1.48 | 1.46 | 2.52E-04 | SNX2                                                | intronic       |
| 7  | 13388834  | T | A | rs115013210           | 1.99E-01 | 0.040 | 0.032 | 1.23 | 0.8  | -1.89 | 1.06E-05 | 0.063 | 0.029 | 2.27 | 1.53 | -3.38 | 2.03 | 2.53E-04 | ARL4A(dist=658276), ETV1(dist=542022)               | intergenic     |
| 1  | 152933023 | T | C | rs6587714             | 1.29E-06 | 0.313 | 0.226 | 0.64 | 0.53 | -0.77 | 8.88E-01 | 0.246 | 0.248 | 1.01 | 0.81 | -1.26 | 0.76 | 2.53E-04 | IVL(dist=48661), SPRR4(dist=10106)                  | intergenic     |
| 15 | 41691063  | G | A | rs145163826           | 1.18E-05 | 0.075 | 0.045 | 1.73 | 1.25 | -2.4  | 7.22E-01 | 0.040 | 0.035 | 1.14 | 0.7  | -1.84 | 1.95 | 2.54E-04 | NDUFAF1                                             | intronic       |
| 3  | 110158435 | G | A | rs57509690            | 2.56E-05 | 0.066 | 0.036 | 1.90 | 1.33 | -2.7  | 4.56E-01 | 0.047 | 0.036 | 1.33 | 0.85 | -2.08 | 1.85 | 2.54E-04 | MIR4445(dist=836691), PVRL3-AS1(dist=605728)        | intergenic     |
| 6  | 109738714 | A | G | rs17070580            | 2.69E-01 | 0.355 | 0.325 | 0.87 | 0.74 | -1.03 | 6.81E-06 | 0.448 | 0.361 | 0.70 | 0.58 | -0.84 | 0.77 | 2.55E-04 | PPLI6                                               | intronic       |
| 16 | 58213970  | G | A | rs2731750             | 2.87E-01 | 0.040 | 0.029 | 1.38 | 0.9  | -2.11 | 3.77E-05 | 0.090 | 0.056 | 1.66 | 1.19 | -2.31 | 1.89 | 2.55E-04 | CSNK2A2                                             | intronic       |
| 3  | 110201788 | G | A | rs9868883             | 1.67E-05 | 0.067 | 0.036 | 1.92 | 1.35 | -2.72 | 5.46E-01 | 0.045 | 0.036 | 1.29 | 0.82 | -2.02 | 1.85 | 2.55E-04 | MIR4445(dist=880044), PVRL3-AS1(dist=562375)        | intergenic     |
| 5  | 122159010 | C | G | rs7701026             | 3.11E-05 | 0.154 | 0.102 | 1.60 | 1.27 | -2.03 | 3.59E-01 | 0.124 | 0.110 | 1.14 | 0.86 | -1.52 | 1.46 | 2.57E-04 | SNX2                                                | intronic       |
| 6  | 32454652  | C | T | rs113888165           | 4.27E-08 | 0.358 | 0.439 | 0.71 | 0.6  | -0.84 | 1.38E-04 | 0.376 | 0.450 | 0.74 | 0.61 | -0.89 | 0.62 | 2.57E-04 | HLA-DRA(dist=41826), HLA-DRB5(dist=30502)           | intergenic     |
| 7  | 143193686 | G | A | rs1404638             | 5.44E-06 | 0.061 | 0.118 | 0.49 | 0.35 | -0.67 | 9.36E-01 | 0.096 | 0.097 | 0.98 | 0.72 | -1.35 | 0.68 | 2.58E-04 | EPHA1-AS1                                           | ncRNA_intronic |
| 5  | 122192135 | G | A | rs59576507            | 2.69E-05 | 0.154 | 0.101 | 1.61 | 1.27 | -2.04 | 3.74E-01 | 0.124 | 0.111 | 1.14 | 0.86 | -1.52 | 1.46 | 2.58E-04 | SNX2A                                               | intronic       |
| 15 | 41647196  | C | T | rs184359290           | 1.97E-05 | 0.084 | 0.052 | 1.68 | 1.23 | -2.29 | 6.83E-01 | 0.049 | 0.044 | 1.14 | 0.74 | -1.75 | 1.80 | 2.59E-04 | NUSAP1                                              | intronic       |
| 1  | 200498428 | C | T | rs4328101             | 1.95E-05 | 0.284 | 0.359 | 1.41 | 1.18 | -1.68 | 5.18E-01 | 0.337 | 0.348 | 1.05 | 0.86 | -1.28 | 1.31 | 2.61E-04 | ZNF281(dist=119242), KIF14(dist=22197)              | intergenic     |
| 6  | 32442836  | T | G | rs13211921            | 5.43E-05 | 0.209 | 0.275 | 0.69 | 0.57 | -0.85 | 2.29E-01 | 0.248 | 0.278 | 0.85 | 0.69 | -1.06 | 0.75 | 2.61E-04 | HLA-DRA(dist=30010), HLA-DRB5(dist=42318)           | intergenic     |
| 3  | 101614718 | T | C | rs6766357             | 3.03E-01 | 0.140 | 0.122 | 1.17 | 0.93 | -1.49 | 1.25E-05 | 0.196 | 0.129 | 1.64 | 1.29 | -2.09 | 1.42 | 2.61E-04 | NFKB1Z(dist=34849), LOC152225(dist=44985)           | intergenic     |
| 6  | 109742015 | G | A | rs9487094             | 2.56E-01 | 0.356 | 0.325 | 0.87 | 0.73 | -1.03 | 8.32E-06 | 0.448 | 0.362 | 0.70 | 0.58 | -0.84 | 0.77 | 2.61E-04 | PPLI6                                               | intronic       |
| 6  | 32443820  | G | A | rs28895244            | 2.43E-05 | 0.296 | 0.369 | 0.72 | 0.6  | -0.86 | 3.24E-01 | 0.354 | 0.381 | 0.89 | 0.73 | -1.08 | 0.76 | 2.66E-04 | HLA-DRA(dist=30994), HLA-DRB5(dist=41334)           | intergenic     |
| 7  | 143188980 | C | G | rs10255417            | 5.73E-06 | 0.061 | 0.118 | 0.49 | 0.35 | -0.67 | 9.36E-01 | 0.096 | 0.097 | 0.98 | 0.72 | -1.35 | 0.68 | 2.66E-04 | EPHA1-AS1                                           | ncRNA_intronic |
| 12 | 68568949  | C | T | rs143498346           | 1.50E-01 | 0.050 | 0.042 | 1.22 | 0.83 | -1.78 | 5.01E-05 | 0.069 | 0.038 | 1.89 | 1.3  | -2.76 | 2.10 | 2.66E-04 | IFNG(dist=15428), IL26(dist=26180)                  | intergenic     |
| 12 | 11860691  | C | T | rs60711165            | 5.61E-05 | 0.080 | 0.046 | 1.79 | 1.3  | -2.46 | 4.45E-01 | 0.059 | 0.050 | 1.19 | 0.8  | -1.77 | 1.78 | 2.67E-04 | ETV6                                                | intronic       |
| 6  | 32453318  | T | C | rs35121819            | 2.53E-06 | 0.243 | 0.310 | 0.71 | 0.59 | -0.86 | 5.67E-01 | 0.323 | 0.346 | 0.90 | 0.74 | -1.1  | 0.74 | 2.67E-04 | HLA-DRA(dist=40492), HLA-DRB5(dist=31836)           | intergenic     |
| 2  | 47636563  | C | T | rs182535728           | 3.05E-05 | 0.057 | 0.034 | 1.71 | 1.18 | -2.47 | 5.82E-01 | 0.037 | 0.033 | 1.15 | 0.7  | -1.9  | 2.32 | 2.69E-04 | MSH2                                                | intronic       |
| 5  | 122116739 | G | A | rs56007922            | 1.72E-05 | 0.155 | 0.101 | 1.63 | 1.29 | -2.06 | 4.52E-01 | 0.125 | 0.113 | 1.12 | 0.84 | -1.48 | 1.46 | 2.70E-04 | SNX2                                                | intronic       |
| 5  | 122116089 | T | T | rs72794679            | 1.73E-05 | 0.155 | 0.101 | 1.63 | 1.29 | -2.06 | 4.52E-01 | 0.125 | 0.113 | 1.12 | 0.84 | -1.48 | 1.46 | 2.71E-04 | SNX2                                                | intronic       |
| 3  | 110149702 | C | T | rs570086470;rs9883319 | 3.26E-05 | 0.066 | 0.036 | 1.88 | 1.32 | -2.67 | 4.46E-01 | 0.047 | 0.036 | 1.32 | 0.85 | -2.06 | 1.84 | 2.71E-04 | MIR4445(dist=827958), PVRL3-AS1(dist=614461)        | intergenic     |
| 6  | 32449726  | A | C | rs2187822             | 6.96E-06 | 0.340 | 0.409 | 0.74 | 0.63 | -0.88 | 4.21E-01 | 0.357 | 0.379 | 0.91 | 0.75 | -1.11 | 0.74 | 2.72E-04 | HLA-DRA(dist=36900), HLA-DRB5(dist=35428)           | intergenic     |
| 6  | 32472931  | T | G | rs75600369            | 4.60E-05 | 0.377 | 0.440 | 0.77 | 0.65 | -0.91 | 2.51E-01 | 0.445 | 0.474 | 0.89 | 0.74 | -1.07 | 0.74 | 2.72E-04 | HLA-DRA(dist=60105), HLA-DRB5(dist=12223)           | intergenic     |
| 10 | 74067715  | T | C | rs10733887            | 1.67E-01 | 0.495 | 0.459 | 0.87 | 0.74 | -1.02 | 3.13E-05 | 0.563 | 0.477 | 0.71 | 0.59 | -0.85 | 0.78 | 2.73E-04 | DDIT4(dist=31918), DNAJB12(dist=24873)              | intergenic     |
| 6  | 155422315 | A | G | rs58748232            | 4.85E-06 | 0.063 | 0.034 | 1.93 | 1.35 | -2.77 | 4.91E-01 | 0.044 | 0.036 | 1.21 | 0.77 | -1.93 | 2.00 | 2.75E-04 | TIAM2                                               | intronic       |
| 3  | 110262741 | T | C | rs9867283             | 2.25E-05 | 0.071 | 0.040 | 1.84 | 1.31 | -2.58 | 5.39E-01 | 0.047 | 0.037 | 1.28 | 0.82 | -2    | 1.82 | 2.77E-04 | MIR4445(dist=940997), PVRL3-AS1(dist=501422)        | intergenic     |
| 6  | 32591198  | C | T | rs9271593             | 3.92E-05 | 0.423 | 0.505 | 0.72 | 0.61 | -0.85 | 2.73E-01 | 0.466 | 0.499 | 0.88 | 0.73 | -1.06 | 0.79 | 2.78E-04 | HLA-DRB1(dist=33585), HLA-DQA1(dist=13985)          | intergenic     |
| 6  | 109738106 | C | T | rs10080429            | 2.94E-01 | 0.352 | 0.323 | 0.88 | 0.74 | -1.04 | 5.65E-06 | 0.446 | 0.358 | 0.69 | 0.57 | -0.84 | 0.77 | 2.79E-04 | PPLI6                                               | intronic       |
| 3  | 110271049 | C | T | rs13324518            | 2.32E-05 | 0.071 | 0.040 | 1.84 | 1.31 | -2.58 | 5.40E-01 | 0.047 | 0.037 | 1.28 | 0.82 | -2    | 1.81 | 2.79E-04 | MIR4445(dist=949305), PVRL3-AS1(dist=493114)        | intergenic     |
| 1  | 101260279 | C | T | rs112549688           | 2.40E-01 | 0.026 | 0.021 | 1.21 | 0.72 | -2.05 | 8.43E-06 | 0.043 | 0.020 | 2.17 | 1.35 | -3.49 | 2.83 | 2.80E-04 | VCAM1(dist=55678), EXTL2(dist=77649)                | intergenic     |
| 7  | 143199048 | A | G | rs4726629             | 4.88E-06 | 0.061 | 0.119 | 0.48 | 0.35 | -0.67 | 9.92E-01 | 0.096 | 0.096 | 0.99 | 0.72 | -1.37 | 0.68 | 2.81E-04 | EPHA1-AS1                                           | ncRNA_intronic |
| 2  | 239414424 | C | A | rs115202552           | 1.94E-05 | 0.058 | 0.036 | 1.65 | 1.14 | -2.37 | 5.45E-01 | 0.041 | 0.035 | 1.16 | 0.72 | -1.87 | 2.36 | 2.83E-04 | ASB1(dist=53533), LINC01107(dist=4907)              | intergenic     |
| 2  | 151423741 | G | A | rs142652536           | 5.52E-05 | 0.062 | 0.037 | 1.73 | 1.21 | -2.48 | 5.92E-01 | 0.032 | 0.027 | 1.18 | 0.69 | -2.02 | 2.13 | 2.83E-04 | LOC101929260                                        | ncRNA_intronic |
| 11 | 68020162  | G | A | rs6591336             | 2.92E-01 | 0.161 | 0.138 | 1.20 | 0.96 | -1.5  | 2.69E-05 | 0.232 | 0.168 | 1.50 | 1.2  | -1.88 | 1.39 | 2.84E-04 | SUV420H1(dist=38923), C11orf24(dist=8641)           | intergenic     |
| 3  | 184517071 | A | T | rs7611491             | 1.25E-05 | 0.374 | 0.449 | 0.73 | 0.62 | -0.87 | 6.54E-01 | 0.409 | 0.409 | 1.00 | 0.83 | -1.21 | 0.73 | 2.84E-04 | LOC101928992(dist=26128), VPS8(dist=12860)          | intergenic     |
| 6  | 32676547  | G | A | rs142373984           | 4.11E-05 | 0.129 | 0.088 | 1.55 | 1.2  | -1.99 | 2.71E-01 | 0.097 | 0.078 | 1.26 | 0.92 | -1.74 | 1.59 | 2.86E-04 | HLA-DQB1(dist=42081), HLA-DQA2(dist=32616)          | intergenic     |
| 5  | 13457782  | T | C | rs13354360            | 7.55E-01 | 0.064 | 0.060 | 1.07 | 0.77 | -1.5  | 1.25E-07 | 0.119 | 0.070 | 1.80 | 1.34 | -2.41 | 1.69 | 2.87E-04 | LINC01194(dist=652487), DNAH5(dist=232655)          | intergenic     |
| 18 | 9440133   | C | A | rs11660100            | 3.98E-05 | 0.189 | 0.243 | 0.73 | 0.59 | -0.89 | 4.58E-01 | 0.240 | 0.257 | 0.91 | 0.73 | -1.14 | 0.72 | 2.88E-04 | TWGS1(dist=37715), RALBP1(dist=35397)               | intergenic     |
| 5  | 122141810 | T | C | rs114963715           | 1.26E-05 | 0.167 | 0.111 | 1.61 | 1.29 | -2.02 | 5.03E    |       |       |      |      |       |      |          |                                                     |                |

|    |           |   |   |                        |          |       |       |      |      |       |          |       |       |      |      |       |      |          |                                                |                |
|----|-----------|---|---|------------------------|----------|-------|-------|------|------|-------|----------|-------|-------|------|------|-------|------|----------|------------------------------------------------|----------------|
| 13 | 104859589 | A | C | rs193147799            | 3.38E-05 | 0.056 | 0.032 | 1.80 | 1.23 | -2.62 | 4.71E-01 | 0.040 | 0.034 | 1.19 | 0.74 | -1.93 | 2.18 | 3.10E-04 | LINC01309(dist=779554), DAOA-AS1(dist=1251817) | intergenic     |
| 5  | 100650102 | C | A | rs115047053            | 7.04E-06 | 0.312 | 0.401 | 0.68 | 0.57 | -0.8  | 6.09E-01 | 0.380 | 0.380 | 1.00 | 0.82 | -1.21 | 0.78 | 3.10E-04 | ST8SIA4(dist=411113), SLC04C1(dist=919590)     | intergenic     |
| 3  | 110292420 | A | G | rs12330129             | 2.80E-05 | 0.071 | 0.040 | 1.82 | 1.3  | -2.55 | 5.35E-01 | 0.047 | 0.037 | 1.28 | 0.82 | -2    | 1.81 | 3.12E-04 | MIR4445(dist=970676), PVRL3-AS1(dist=471743)   | intergenic     |
| 7  | 41272211  | G | T | rs7793245              | 1.41E-01 | 0.101 | 0.088 | 1.16 | 0.89 | -1.53 | 4.77E-05 | 0.130 | 0.080 | 1.72 | 1.29 | -2.28 | 1.55 | 3.13E-04 | LINC01449(dist=99112), INHBA(dist=456390)      | intergenic     |
| 11 | 68021893  | G | A | rs10791967             | 2.91E-01 | 0.164 | 0.140 | 1.20 | 0.96 | -1.5  | 3.15E-05 | 0.233 | 0.169 | 1.50 | 1.2  | -1.87 | 1.38 | 3.13E-04 | SUV420H1(dist=40654), C11orf24(dist=6910)      | intergenic     |
| 11 | 128564996 | T | C | rs7945814              | 4.17E-05 | 0.336 | 0.259 | 0.69 | 0.58 | -0.82 | 4.70E-01 | 0.281 | 0.268 | 0.93 | 0.76 | -1.15 | 0.77 | 3.14E-04 | SENCR                                          | ncRNA_intronic |
| 3  | 110292148 | T | C | rs12330749             | 2.80E-05 | 0.071 | 0.040 | 1.82 | 1.3  | -2.55 | 5.38E-01 | 0.047 | 0.037 | 1.28 | 0.82 | -2    | 1.80 | 3.15E-04 | MIR4445(dist=970404), PVRL3-AS1(dist=472015)   | intergenic     |
| 6  | 32501379  | A | C | rs72851018             | 1.88E-05 | 0.188 | 0.250 | 0.70 | 0.57 | -0.86 | 4.01E-01 | 0.214 | 0.235 | 0.89 | 0.7  | -1.11 | 0.72 | 3.15E-04 | HLA-DRB5(dist=3373), HLA-DRB6(dist=19111)      | intergenic     |
| 6  | 32449160  | G | T | rs9394099              | 1.19E-05 | 0.188 | 0.255 | 0.68 | 0.55 | -0.83 | 3.49E-01 | 0.261 | 0.287 | 0.87 | 0.71 | -1.08 | 0.75 | 3.17E-04 | HLA-DRA(dist=36334), HLA-DRB5(dist=35994)      | intergenic     |
| 15 | 91732596  | T | G | rs386786417;rs8040672  | 5.84E-06 | 0.070 | 0.037 | 1.94 | 1.38 | -2.73 | 8.48E-01 | 0.034 | 0.033 | 1.01 | 0.6  | -1.7  | 1.99 | 3.18E-04 | SV2B                                           | intronic       |
| 15 | 91732594  | A | G | rs8036378;rs386786417  | 5.85E-06 | 0.070 | 0.037 | 1.94 | 1.38 | -2.73 | 8.48E-01 | 0.034 | 0.033 | 1.01 | 0.6  | -1.7  | 1.99 | 3.18E-04 | SV2B                                           | intronic       |
| 3  | 83751835  | T | C | rs113761783            | 3.77E-05 | 0.252 | 0.171 | 1.63 | 1.34 | -1.98 | 4.66E-01 | 0.205 | 0.209 | 0.97 | 0.77 | -1.23 | 1.36 | 3.19E-04 | GBE1(dist=1940885), LINC00971(dist=935721)     | intergenic     |
| 6  | 109744533 | T | A | rs9480955              | 3.08E-01 | 0.352 | 0.323 | 0.88 | 0.74 | -1.04 | 6.19E-06 | 0.448 | 0.361 | 0.70 | 0.58 | -0.84 | 0.78 | 3.20E-04 | PPL6                                           | intergenic     |
| 17 | 65166258  | G | A | rs73343163             | 5.23E-01 | 0.025 | 0.022 | 1.13 | 0.66 | -1.91 | 7.23E-07 | 0.052 | 0.021 | 2.51 | 1.61 | -3.9  | 2.46 | 3.21E-04 | HELZ                                           | intronic       |
| 17 | 65095476  | C | T | rs73340992             | 5.11E-01 | 0.026 | 0.023 | 1.12 | 0.67 | -1.88 | 2.14E-06 | 0.054 | 0.023 | 2.45 | 1.59 | -3.77 | 2.39 | 3.22E-04 | HELZ                                           | intronic       |
| 6  | 109744690 | T | C | rs9320287              | 3.09E-01 | 0.352 | 0.323 | 0.88 | 0.74 | -1.04 | 6.24E-06 | 0.448 | 0.361 | 0.70 | 0.58 | -0.84 | 0.78 | 3.22E-04 | PPL6                                           | intronic       |
| 7  | 41268260  | G | A | rs58268206             | 1.42E-01 | 0.101 | 0.088 | 1.16 | 0.89 | -1.53 | 4.84E-05 | 0.130 | 0.080 | 1.72 | 1.29 | -2.28 | 1.55 | 3.23E-04 | LINC01449(dist=95161), INHBA(dist=460341)      | intergenic     |
| 6  | 32455168  | C | T | rs114220057            | 1.38E-05 | 0.388 | 0.453 | 0.76 | 0.65 | -0.9  | 4.41E-01 | 0.430 | 0.454 | 0.91 | 0.75 | -1.1  | 0.74 | 3.23E-04 | HLA-DRA(dist=42342), HLA-DRB5(dist=29986)      | intergenic     |
| 7  | 41267211  | C | T | rs56865647             | 1.42E-01 | 0.101 | 0.088 | 1.16 | 0.89 | -1.53 | 4.78E-05 | 0.130 | 0.080 | 1.72 | 1.29 | -2.28 | 1.55 | 3.23E-04 | LINC01449(dist=94112), INHBA(dist=461390)      | intergenic     |
| 20 | 8193619   | T | G | rs6055657              | 3.19E-01 | 0.090 | 0.080 | 1.14 | 0.85 | -1.51 | 2.32E-05 | 0.132 | 0.074 | 1.91 | 1.44 | -2.53 | 1.53 | 3.24E-04 | PLCB1                                          | intronic       |
| 6  | 32472934  | A | G | rs77290417             | 5.54E-05 | 0.374 | 0.436 | 0.77 | 0.65 | -0.92 | 2.59E-01 | 0.446 | 0.474 | 0.89 | 0.74 | -1.08 | 0.74 | 3.25E-04 | HLA-DRA(dist=60108), HLA-DRB5(dist=12220)      | intergenic     |
| 3  | 32449138  | C | T | rs9394098              | 1.78E-05 | 0.195 | 0.261 | 0.69 | 0.56 | -0.84 | 3.26E-01 | 0.260 | 0.288 | 0.87 | 0.7  | -1.08 | 0.75 | 3.25E-04 | HLA-DRA(dist=36312), HLA-DRB5(dist=36016)      | intergenic     |
| 14 | 38719281  | C | T | rs10444703             | 3.34E-05 | 0.124 | 0.080 | 1.64 | 1.27 | -2.12 | 4.12E-01 | 0.096 | 0.091 | 1.06 | 0.77 | -1.46 | 1.63 | 3.26E-04 | SSTR1(dist=37013), CLEC14A(dist=3924)          | intergenic     |
| 5  | 122102994 | C | G | rs55788388             | 3.06E-05 | 0.152 | 0.101 | 1.60 | 1.27 | -2.03 | 4.07E-01 | 0.126 | 0.113 | 1.13 | 0.85 | -1.5  | 1.45 | 3.26E-04 | LOC101927379(dist=36739), SNX2(dist=7697)      | intergenic     |
| 7  | 41265104  | G | A | rs61129066             | 1.43E-01 | 0.100 | 0.088 | 1.16 | 0.88 | -1.53 | 4.70E-05 | 0.130 | 0.080 | 1.72 | 1.29 | -2.28 | 1.55 | 3.26E-04 | LINC01449(dist=92005), INHBA(dist=463497)      | intergenic     |
| 7  | 41264611  | C | T | rs59955258             | 1.43E-01 | 0.100 | 0.088 | 1.16 | 0.88 | -1.53 | 4.70E-05 | 0.130 | 0.080 | 1.72 | 1.29 | -2.28 | 1.55 | 3.27E-04 | LINC01449(dist=91512), INHBA(dist=463990)      | intergenic     |
| 7  | 41264654  | G | A | rs58589699             | 1.43E-01 | 0.100 | 0.088 | 1.16 | 0.88 | -1.53 | 4.70E-05 | 0.130 | 0.080 | 1.72 | 1.29 | -2.28 | 1.55 | 3.28E-04 | LINC01449(dist=91555), INHBA(dist=463947)      | intergenic     |
| 16 | 87492518  | T | G | rs34026066             | 1.38E-05 | 0.072 | 0.032 | 2.35 | 1.66 | -3.33 | 4.95E-01 | 0.067 | 0.065 | 1.03 | 0.71 | -1.5  | 1.79 | 3.28E-04 | ZCCHC14                                        | intronic       |
| 7  | 41263887  | C | T | rs59091698             | 1.43E-01 | 0.100 | 0.088 | 1.16 | 0.88 | -1.53 | 4.70E-05 | 0.130 | 0.080 | 1.72 | 1.29 | -2.28 | 1.55 | 3.29E-04 | LINC01449(dist=90788), INHBA(dist=464714)      | intergenic     |
| 7  | 141816195 | T | A | rs386718616;rs57652679 | 5.56E-05 | 0.547 | 0.457 | 0.70 | 0.59 | -0.82 | 5.84E-01 | 0.444 | 0.448 | 0.98 | 0.81 | -1.19 | 0.78 | 3.32E-04 | LOC93432                                       | intronic       |
| 20 | 8192229   | T | A | rs58911268             | 3.22E-01 | 0.090 | 0.080 | 1.13 | 0.85 | -1.51 | 2.20E-05 | 0.131 | 0.073 | 1.91 | 1.43 | -2.53 | 1.53 | 3.33E-04 | PLCB1                                          | intronic       |
| 6  | 32534421  | A | T | rs112073772            | 3.27E-05 | 0.171 | 0.225 | 0.71 | 0.57 | -0.88 | 2.61E-01 | 0.242 | 0.271 | 0.86 | 0.69 | -1.07 | 0.72 | 3.35E-04 | HLA-DRB6(dist=6642), HLA-DRB1(dist=12126)      | intergenic     |
| 7  | 41263512  | C | T | rs73687963             | 1.45E-01 | 0.100 | 0.088 | 1.16 | 0.88 | -1.53 | 4.74E-05 | 0.130 | 0.080 | 1.71 | 1.29 | -2.28 | 1.55 | 3.36E-04 | LINC01449(dist=90413), INHBA(dist=465089)      | intergenic     |
| 2  | 45127240  | T | C | rs114083662            | 1.44E-01 | 0.104 | 0.092 | 1.15 | 0.88 | -1.5  | 2.87E-05 | 0.124 | 0.073 | 1.78 | 1.33 | -2.38 | 1.54 | 3.37E-04 | CAMKMT(dist=127509), SIX3-AS1(dist=40053)      | intergenic     |
| 7  | 41258437  | C | A | rs60939619             | 1.46E-01 | 0.100 | 0.088 | 1.16 | 0.88 | -1.53 | 4.62E-05 | 0.130 | 0.080 | 1.71 | 1.29 | -2.27 | 1.55 | 3.37E-04 | LINC01449(dist=85338), INHBA(dist=470164)      | intergenic     |
| 6  | 32452409  | G | C | rs71543455             | 3.05E-05 | 0.201 | 0.264 | 0.70 | 0.57 | -0.85 | 2.95E-01 | 0.254 | 0.283 | 0.86 | 0.7  | -1.07 | 0.75 | 3.37E-04 | HLA-DRA(dist=39583), HLA-DRB5(dist=32745)      | intergenic     |
| 3  | 110269712 | C | A | rs2036968              | 2.96E-06 | 0.139 | 0.089 | 0.61 | 0.47 | -0.77 | 9.83E-01 | 0.095 | 0.087 | 0.92 | 0.66 | -1.26 | 0.67 | 3.39E-04 | MIR4445(dist=947968), PVRL3-AS1(dist=494451)   | intergenic     |
| 3  | 83743988  | A | G | rs13093756             | 4.28E-05 | 0.251 | 0.171 | 1.62 | 1.34 | -1.97 | 4.58E-01 | 0.205 | 0.209 | 0.97 | 0.77 | -1.23 | 1.36 | 3.42E-04 | GBE1(dist=1933038), LINC00971(dist=943568)     | intergenic     |
| 7  | 41270166  | C | T | rs80101642             | 1.45E-01 | 0.101 | 0.089 | 1.16 | 0.88 | -1.53 | 5.06E-05 | 0.129 | 0.080 | 1.72 | 1.29 | -2.28 | 1.55 | 3.43E-04 | LINC01449(dist=97067), INHBA(dist=458435)      | intergenic     |
| 3  | 83767891  | T | A | rs4856234              | 5.93E-05 | 0.249 | 0.170 | 1.62 | 1.34 | -1.97 | 4.11E-01 | 0.205 | 0.208 | 0.98 | 0.78 | -1.24 | 1.36 | 3.43E-04 | LINC1(dist=1956941), LINC00971(dist=919665)    | intergenic     |
| 7  | 41270635  | C | T | rs74514157             | 1.45E-01 | 0.101 | 0.089 | 1.16 | 0.88 | -1.52 | 5.05E-05 | 0.129 | 0.080 | 1.72 | 1.29 | -2.28 | 1.55 | 3.43E-04 | LINC01449(dist=97536), INHBA(dist=457966)      | intergenic     |
| 7  | 41269369  | T | C | rs74423168             | 1.45E-01 | 0.101 | 0.088 | 1.16 | 0.88 | -1.53 | 5.03E-05 | 0.130 | 0.080 | 1.72 | 1.29 | -2.28 | 1.55 | 3.44E-04 | LINC01449(dist=96270), INHBA(dist=452232)      | intergenic     |
| 3  | 40408836  | C | T | rs7612051              | 6.15E-05 | 0.323 | 0.419 | 0.66 | 0.56 | -0.79 | 4.47E-01 | 0.339 | 0.342 | 0.99 | 0.81 | -1.21 | 0.78 | 3.45E-04 | EIF1B(dist=54921), ENTPD3(dist=19811)          | intergenic     |
| 8  | 97389774  | C | T | rs17709959             | 4.39E-05 | 0.288 | 0.361 | 0.72 | 0.6  | -0.85 | 5.51E-01 | 0.340 | 0.357 | 0.93 | 0.76 | -1.13 | 0.78 | 3.45E-04 | LOC102724804                                   | ncRNA_intronic |
| 3  | 110270929 | G | A | rs13324533             | 3.51E-05 | 0.073 | 0.042 | 1.80 | 1.29 | -2.5  | 5.29E-01 | 0.048 | 0.038 | 1.28 | 0.82 | -1.99 | 1.78 | 3.47E-04 | MIR4445(dist=949185), PVRL3-AS1(dist=493234)   | intergenic     |
| 16 | 76968079  | A | G | rs74864534             | 2.21E-05 | 0.133 | 0.086 | 1.63 | 1.27 | -2.09 | 6.31E-01 | 0.099 | 0.089 | 1.12 | 0.82 | -1.53 | 1.51 | 3.47E-04 | MIR4719(dist=65163), MON1B(dist=256737)        | intergenic     |
| 6  | 32590501  | A | C | rs9271573              | 4.30E-05 | 0.425 | 0.506 | 0.72 | 0.61 | -0.85 | 3.07E-01 | 0.466 | 0.496 | 0.89 | 0.73 | -1.07 | 0.79 | 3.48E-04 | HLA-DRB1(dist=32888), HLA-DQA1(dist=146882)    | intergenic     |
| 6  | 32446307  | C | T | rs17203549             | 2.72E-05 | 0.209 | 0.275 | 0.70 | 0.57 | -0.85 | 3.16E-01 | 0.273 | 0.301 | 0.87 | 0.71 | -1.08 | 0.75 | 3.48E-04 | HLA-DRA(dist=33481), HLA-DRB5(dist=38847)      | intergenic     |
| 19 | 15162732  | G | C | rs78781651             | 1.30E-05 | 0.055 | 0.029 | 1.96 | 1.34 | -2.88 | 7.11E-01 | 0.030 | 0.026 | 1.17 | 0.67 | -2.02 | 2.11 | 3.50E-04 | CASP14                                         | intronic       |
| 20 | 8193532   | C | T | rs6055656              | 3.19E-01 | 0.090 | 0.080 | 1.14 | 0.85 | -1.51 | 4.68E-06 | 0.123 | 0.070 | 1.85 | 1.38 | -2.48 | 1.58 | 3.50E-04 | PLCB1                                          | intronic       |
| 2  | 107141084 | G | A | rs4595968              | 3.95E-05 | 0.098 | 0.062 | 0.61 | 0.46 | -0.81 | 5.03E-01 | 0.065 | 0.056 | 0.85 | 0.58 | -1.25 | 0.60 | 3.50E-04 | RGPD3(dist=56283), ST6GAL2(dist=276972)        | intergenic     |
| 3  | 83757155  | T | C | rs2177654              | 5.13E-05 | 0.251 | 0.171 | 1.63 | 1.34 | -1.97 | 4.42E-01 | 0.205 | 0.209 | 0.98 | 0.78 | -1.23 | 1.36 | 3.54E-04 | GBE1(dist=1946205), LINC00971(dist=930401)     | intergenic     |
| 4  | 16895803  | A | G | rs57695492             | 4.60E-06 | 0.183 | 0.127 | 1.53 | 1.23 | -1.9  | 9.71E-01 | 0.124 | 0.119 | 1.04 | 0.79 | -1.39 | 1.45 | 3.54E-04 | LDB2                                           | intronic       |
| 5  | 122111005 | G | T | rs2276988              | 2.74E-05 | 0.152 | 0.100 | 1.61 | 1.28 | -2.04 | 4.47E-01 | 0.124 | 0.113 | 1.12 | 0.84 | -1.49 | 1.45 | 3.55E-04 | SNX2(NM_001278199;c.-24507G>T)                 | UTR5           |
| 5  | 122111339 | T | C | rs6880015              | 2.75E-05 | 0.153 | 0.101 | 1.62 | 1.28 | -2.04 | 4.50E-01 | 0.125 | 0.113 | 1.12 | 0.84 | -1.48 | 1.45 | 3.56E-04 | SNX2(NM_001278199;c.-24173T>C)                 | UTR5           |
| 2  | 134376203 | G | A | rs137977287            | 1.68E-05 | 0.192 | 0.269 | 0.65 | 0.53 | -0.79 | 6.36E-01 | 0.236 |       |      |      |       |      |          |                                                |                |

|    |           |   |   |                                    |          |       |       |      |      |       |          |       |       |      |      |       |      |          |                                                |                |
|----|-----------|---|---|------------------------------------|----------|-------|-------|------|------|-------|----------|-------|-------|------|------|-------|------|----------|------------------------------------------------|----------------|
| 3  | 110291731 | A | G | rs12695213                         | 4.15E-05 | 0.074 | 0.043 | 1.78 | 1.28 | -2.48 | 5.27E-01 | 0.048 | 0.038 | 1.28 | 0.82 | -1.99 | 1.77 | 3.87E-04 | MIR4445(dist=969987), PVRL3-AS1(dist=472432)   | intergenic     |
| 3  | 110286517 | G | A | rs13315083                         | 4.11E-05 | 0.074 | 0.043 | 1.78 | 1.28 | -2.48 | 5.30E-01 | 0.048 | 0.038 | 1.28 | 0.82 | -1.99 | 1.77 | 3.88E-04 | MIR4445(dist=964773), PVRL3-AS1(dist=477646)   | intergenic     |
| 3  | 110290342 | A | G | rs79102290                         | 4.16E-05 | 0.074 | 0.043 | 1.78 | 1.28 | -2.48 | 5.27E-01 | 0.048 | 0.038 | 1.28 | 0.82 | -1.99 | 1.77 | 3.88E-04 | MIR4445(dist=968598), PVRL3-AS1(dist=473821)   | intergenic     |
| 11 | 128571710 | T | C | rs594479                           | 2.13E-05 | 0.349 | 0.269 | 0.68 | 0.58 | -0.81 | 8.69E-01 | 0.282 | 0.282 | 1.00 | 0.81 | -1.23 | 0.76 | 3.91E-04 | FLI1                                           | intronic       |
| 12 | 49635846  | C | T | rs12579189                         | 1.82E-01 | 0.032 | 0.023 | 1.37 | 0.85 | -2.22 | 5.81E-05 | 0.049 | 0.025 | 2.05 | 1.32 | -3.21 | 2.19 | 3.92E-04 | TUBA1C                                         | intronic       |
| 19 | 52492362  | A | T | rs16983336                         | 3.94E-01 | 0.039 | 0.030 | 1.28 | 0.83 | -1.97 | 4.06E-06 | 0.065 | 0.031 | 2.16 | 1.46 | -3.19 | 1.95 | 3.92E-04 | ZNF350(dist=2283), ZNF615(dist=2225)           | intergenic     |
| 6  | 32597064  | G | A | rs74927567                         | 4.51E-05 | 0.410 | 0.489 | 0.73 | 0.62 | -0.86 | 3.14E-01 | 0.469 | 0.499 | 0.89 | 0.73 | -1.07 | 0.79 | 3.96E-04 | HLA-DRB1(dist=39451), HLA-DQA1(dist=8119)      | intergenic     |
| 13 | 71311721  | T | C | rs12876111                         | 2.03E-01 | 0.103 | 0.081 | 1.31 | 1    | -1.72 | 5.04E-05 | 0.158 | 0.110 | 1.52 | 1.17 | -1.97 | 1.50 | 3.96E-04 | ATXN8OS(dist=597836), LINC00348(dist=277552)   | intergenic     |
| 6  | 32446071  | C | G | rs17203514                         | 3.84E-05 | 0.204 | 0.272 | 0.69 | 0.56 | -0.84 | 3.21E-01 | 0.261 | 0.289 | 0.87 | 0.7  | -1.07 | 0.76 | 3.97E-04 | HLA-DRA(dist=33245), HLA-DRB5(dist=39083)      | intergenic     |
| 11 | 128564794 | A | C | rs7930515                          | 4.01E-05 | 0.332 | 0.257 | 0.69 | 0.58 | -0.83 | 5.16E-01 | 0.286 | 0.274 | 0.94 | 0.77 | -1.16 | 0.77 | 3.98E-04 | SENCR                                          | ncRNA_intronic |
| 5  | 141086688 | T | C | rs74947859                         | 4.53E-05 | 0.061 | 0.032 | 1.98 | 1.37 | -2.85 | 4.54E-01 | 0.049 | 0.045 | 1.09 | 0.7  | -1.68 | 1.94 | 3.99E-04 | ARAP3(dist=24888), PCDH11(dist=145988)         | intergenic     |
| 7  | 86887851  | G | T | rs55677500                         | 2.98E-05 | 0.319 | 0.251 | 1.40 | 1.17 | -1.67 | 5.97E-01 | 0.263 | 0.250 | 1.07 | 0.87 | -1.32 | 1.31 | 3.99E-04 | TMEM243(dist=38820), TP53TG1(dist=66813)       | intergenic     |
| 4  | 118427044 | T | C | rs73853449                         | 1.39E-05 | 0.053 | 0.024 | 2.27 | 1.52 | -3.39 | 9.31E-01 | 0.024 | 0.022 | 1.08 | 0.58 | -1.99 | 2.11 | 4.00E-04 | LINC01378                                      | ncRNA_intronic |
| 3  | 83766742  | T | A | rs1404427                          | 6.44E-05 | 0.250 | 0.170 | 1.63 | 1.34 | -1.97 | 4.33E-01 | 0.206 | 0.209 | 0.98 | 0.78 | -1.23 | 1.35 | 4.00E-04 | GBE1(dist=1955792), LINC00971(dist=920814)     | intergenic     |
| 3  | 40382893  | A | G | rs386660383;rs6772883              | 6.33E-05 | 0.299 | 0.391 | 0.66 | 0.56 | -0.79 | 4.88E-01 | 0.311 | 0.313 | 0.99 | 0.81 | -1.21 | 0.78 | 4.01E-04 | EIF1B(dist=28978), ENTPD3(dist=45754)          | intergenic     |
| 3  | 40382892  | C | T | rs6808818;rs386660383              | 2.73E-05 | 0.204 | 0.400 | 0.65 | 0.55 | -0.78 | 6.55E-01 | 0.325 | 0.322 | 1.01 | 0.83 | -1.24 | 0.78 | 4.03E-04 | EIF1B(dist=28977), ENTPD3(dist=45755)          | intergenic     |
| 19 | 52492480  | C | T | rs17695936                         | 4.03E-01 | 0.038 | 0.030 | 1.28 | 0.83 | -1.97 | 4.06E-06 | 0.065 | 0.031 | 2.16 | 1.46 | -3.19 | 1.95 | 4.10E-04 | ZNF350(dist=2401), ZNF615(dist=2107)           | intergenic     |
| 7  | 41250458  | C | T | rs6974916                          | 1.67E-01 | 0.100 | 0.088 | 1.15 | 0.88 | -1.51 | 4.29E-05 | 0.132 | 0.082 | 1.71 | 1.29 | -2.26 | 1.54 | 4.12E-04 | LINC01449(dist=77359), INHBA(dist=478143)      | intergenic     |
| 10 | 89376795  | A | C | rs80113577                         | 1.86E-01 | 0.036 | 0.030 | 1.21 | 0.78 | -1.88 | 3.26E-05 | 0.056 | 0.028 | 2.10 | 1.38 | -3.2  | 2.14 | 4.12E-04 | MINPP1(dist=63577), PAPSS2(dist=42681)         | intergenic     |
| 11 | 113860389 | C | T | rs35944954                         | 7.09E-06 | 0.049 | 0.023 | 2.22 | 1.46 | -3.36 | 7.61E-01 | 0.030 | 0.026 | 1.15 | 0.67 | -2    | 2.08 | 4.13E-04 | HTR3A                                          | exonic         |
| 10 | 89376750  | C | T | rs115679165                        | 1.86E-01 | 0.036 | 0.030 | 1.21 | 0.78 | -1.88 | 3.28E-05 | 0.056 | 0.028 | 2.10 | 1.38 | -3.2  | 2.14 | 4.15E-04 | MINPP1(dist=63532), PAPSS2(dist=42726)         | intergenic     |
| 18 | 6743428   | T | A | rs73380739                         | 1.32E-01 | 0.069 | 0.059 | 1.19 | 0.86 | -1.64 | 2.01E-05 | 0.087 | 0.054 | 1.69 | 1.2  | -2.37 | 1.83 | 4.18E-04 | LINC01387(dist=152776), ARHGAP28(dist=91004)   | intergenic     |
| 18 | 59584006  | G | A | rs9956020                          | 1.26E-01 | 0.113 | 0.101 | 1.14 | 0.88 | -1.48 | 6.33E-05 | 0.129 | 0.083 | 1.65 | 1.24 | -2.19 | 1.57 | 4.18E-04 | RNF152(dist=23702), PIGN(dist=127452)          | intergenic     |
| 11 | 117485096 | C | T | rs116540844                        | 3.24E-01 | 0.061 | 0.054 | 1.12 | 0.79 | -1.58 | 3.79E-06 | 0.081 | 0.043 | 1.94 | 1.36 | -2.76 | 1.82 | 4.19E-04 | DSCAML1                                        | intronic       |
| 5  | 100807345 | G | T | rs462013                           | 2.46E-06 | 0.337 | 0.239 | 1.62 | 1.36 | -1.93 | 9.21E-01 | 0.269 | 0.281 | 0.94 | 0.76 | -1.16 | 1.31 | 4.20E-04 | STBSIA4(dist=568356), SLCO4C1(dist=762347)     | intergenic     |
| 3  | 142582639 | T | C | rs9871046                          | 5.24E-05 | 0.540 | 0.478 | 1.28 | 1.09 | -1.51 | 4.67E-01 | 0.500 | 0.464 | 1.15 | 0.96 | -1.39 | 1.27 | 4.21E-04 | PCOLCE2                                        | intronic       |
| 6  | 32453338  | C | T | rs75259234                         | 4.75E-05 | 0.194 | 0.253 | 0.71 | 0.58 | -0.87 | 2.69E-01 | 0.245 | 0.275 | 0.86 | 0.69 | -1.07 | 0.75 | 4.21E-04 | HLA-DRA(dist=40512), HLA-DRB5(dist=31816)      | intergenic     |
| 1  | 200498000 | T | C | rs10919963                         | 5.07E-05 | 0.282 | 0.357 | 1.41 | 1.18 | -1.69 | 5.28E-01 | 0.333 | 0.344 | 1.05 | 0.86 | -1.28 | 1.29 | 4.21E-04 | ZNF281(dist=118814), KIF14(dist=22625)         | intergenic     |
| 11 | 128578047 | T | G | rs635887                           | 1.97E-05 | 0.342 | 0.263 | 0.69 | 0.58 | -0.82 | 6.73E-01 | 0.275 | 0.268 | 0.96 | 0.78 | -1.19 | 0.77 | 4.27E-04 | FLI1                                           | intronic       |
| 10 | 97239781  | T | C | rs7089306                          | 2.87E-05 | 0.382 | 0.466 | 1.42 | 1.2  | -1.67 | 5.44E-01 | 0.425 | 0.439 | 1.06 | 0.88 | -1.28 | 1.26 | 4.27E-04 | SORBS1                                         | intronic       |
| 3  | 83767901  | G | A | rs4856235                          | 5.56E-05 | 0.249 | 0.169 | 1.63 | 1.34 | -1.97 | 4.59E-01 | 0.210 | 0.214 | 0.97 | 0.77 | -1.23 | 1.35 | 4.29E-04 | GBE1(dist=1956951), LINC00971(dist=919655)     | intergenic     |
| 11 | 68020345  | G | A | rs7950910                          | 2.84E-01 | 0.167 | 0.144 | 1.19 | 0.96 | -1.49 | 5.70E-05 | 0.233 | 0.171 | 1.48 | 1.18 | -1.84 | 1.37 | 4.30E-04 | SUV420H1(dist=39106), C11orf24(dist=8458)      | intergenic     |
| 11 | 17319518  | A | G | rs189464305                        | 5.63E-01 | 0.033 | 0.028 | 1.18 | 0.74 | -1.86 | 9.52E-07 | 0.079 | 0.047 | 1.74 | 1.22 | -2.47 | 2.07 | 4.34E-04 | NUCB2                                          | intronic       |
| 7  | 41248907  | G | A | rs59138481                         | 1.76E-01 | 0.101 | 0.089 | 1.15 | 0.87 | -1.51 | 4.15E-05 | 0.132 | 0.082 | 1.71 | 1.29 | -2.26 | 1.53 | 4.41E-04 | LINC01449(dist=75808), INHBA(dist=479694)      | intergenic     |
| 2  | 22942789  | G | C | rs13430648                         | 1.04E-05 | 0.087 | 0.048 | 1.90 | 1.4  | -2.59 | 8.52E-01 | 0.049 | 0.044 | 1.11 | 0.72 | -1.71 | 1.68 | 4.43E-04 | LOC102723362(dist=181630), KLHL29(dist=665509) | intergenic     |
| 8  | 96065878  | G | A | rs9297952                          | 1.75E-01 | 0.104 | 0.081 | 1.32 | 1    | -1.73 | 5.68E-05 | 0.139 | 0.107 | 1.35 | 1.03 | -1.77 | 1.63 | 4.44E-04 | NDUFAF6                                        | intronic       |
| 1  | 161540857 | T | A | rs67418890                         | 3.30E-01 | 0.040 | 0.030 | 1.38 | 0.9  | -2.11 | 2.39E-05 | 0.057 | 0.031 | 1.87 | 1.23 | -2.83 | 2.27 | 4.45E-04 | FCGR3A(dist=20444), FCGR2C(dist=10272)         | intergenic     |
| 2  | 22943003  | A | G | rs13419300                         | 1.05E-05 | 0.087 | 0.048 | 1.90 | 1.4  | -2.59 | 8.52E-01 | 0.049 | 0.044 | 1.11 | 0.72 | -1.71 | 1.68 | 4.46E-04 | LOC102723362(dist=181844), KLHL29(dist=665295) | intergenic     |
| 10 | 108247678 | T | C | rs79373912                         | 1.37E-05 | 0.105 | 0.065 | 1.68 | 1.27 | -2.21 | 6.79E-01 | 0.078 | 0.072 | 1.09 | 0.77 | -1.55 | 1.64 | 4.49E-04 | LOC101927549(dist=667587), SORCS1(dist=85743)  | intergenic     |
| 6  | 32446922  | T | C | rs17203619                         | 4.23E-05 | 0.197 | 0.261 | 0.70 | 0.57 | -0.85 | 3.26E-01 | 0.252 | 0.279 | 0.87 | 0.7  | -1.08 | 0.76 | 4.49E-04 | HLA-DRA(dist=34096), HLA-DRB5(dist=38232)      | intergenic     |
| 6  | 32446010  | C | T | rs17209873                         | 1.14E-05 | 0.243 | 0.314 | 0.70 | 0.58 | -0.84 | 5.28E-01 | 0.295 | 0.314 | 0.91 | 0.74 | -1.12 | 0.76 | 4.52E-04 | HLA-DRA(dist=33184), HLA-DRB5(dist=39144)      | intergenic     |
| 6  | 32447111  | A | G | rs29001652                         | 4.21E-05 | 0.207 | 0.272 | 0.70 | 0.57 | -0.85 | 3.21E-01 | 0.262 | 0.290 | 0.87 | 0.7  | -1.07 | 0.76 | 4.53E-04 | HLA-DRA(dist=34285), HLA-DRB5(dist=38043)      | intergenic     |
| 1  | 162441037 | T | G | rs149100                           | 1.93E-01 | 0.326 | 0.294 | 0.86 | 0.72 | -1.02 | 5.53E-05 | 0.395 | 0.340 | 0.79 | 0.65 | -0.95 | 0.73 | 4.53E-04 | SH2D1B(dist=59109), UHMK1(dist=25927)          | intergenic     |
| 2  | 22953013  | T | G | rs10169938                         | 1.46E-05 | 0.086 | 0.048 | 1.88 | 1.38 | -2.56 | 7.96E-01 | 0.050 | 0.045 | 1.12 | 0.73 | -1.73 | 1.68 | 4.55E-04 | LOC102723362(dist=191854), KLHL29(dist=655285) | intergenic     |
| 7  | 41248193  | C | G | rs139436371;rs375015074;rs73687960 | 1.79E-01 | 0.101 | 0.089 | 1.15 | 0.87 | -1.51 | 4.12E-05 | 0.133 | 0.082 | 1.71 | 1.29 | -2.26 | 1.53 | 4.56E-04 | LINC01449(dist=75094), INHBA(dist=480408)      | intergenic     |
| 11 | 68023032  | G | A | rs11228182                         | 3.47E-01 | 0.164 | 0.142 | 1.18 | 0.95 | -1.48 | 3.46E-05 | 0.233 | 0.168 | 1.51 | 1.2  | -1.88 | 1.36 | 4.57E-04 | SUV420H1(dist=41793), C11orf24(dist=5771)      | intergenic     |
| 2  | 45125733  | G | T | rs78371468                         | 1.66E-01 | 0.103 | 0.092 | 1.14 | 0.87 | -1.49 | 3.21E-05 | 0.124 | 0.073 | 1.78 | 1.34 | -2.39 | 1.52 | 4.57E-04 | CAMKMT(dist=126002), SIX3-AS1(dist=41560)      | intergenic     |
| 15 | 41609640  | C | T | rs148256233                        | 3.44E-05 | 0.075 | 0.046 | 1.68 | 1.21 | -2.32 | 6.77E-01 | 0.043 | 0.038 | 1.15 | 0.72 | -1.82 | 1.83 | 4.58E-04 | OIP5                                           | intronic       |
| 13 | 24634764  | C | T | rs111422021                        | 1.92E-01 | 0.032 | 0.026 | 1.26 | 0.78 | -2.02 | 5.23E-05 | 0.051 | 0.027 | 1.94 | 1.26 | -3.01 | 2.29 | 4.58E-04 | SPATA13                                        | intronic       |
| 6  | 32447014  | G | A | rs17203636                         | 3.15E-05 | 0.202 | 0.268 | 0.69 | 0.57 | -0.84 | 3.71E-01 | 0.257 | 0.283 | 0.88 | 0.71 | -1.09 | 0.76 | 4.58E-04 | HLA-DRA(dist=34188), HLA-DRB5(dist=38140)      | intergenic     |
| 5  | 100738471 | A | G | rs73182422                         | 4.82E-05 | 0.195 | 0.274 | 0.64 | 0.52 | -0.78 | 4.13E-01 | 0.239 | 0.246 | 0.96 | 0.77 | -1.2  | 0.77 | 4.58E-04 | STBSIA4(dist=499482), SLCO4C1(dist=831221)     | intergenic     |
| 2  | 45125092  | C | T | rs116799217                        | 1.66E-01 | 0.103 | 0.092 | 1.14 | 0.87 | -1.49 | 3.32E-05 | 0.124 | 0.073 | 1.79 | 1.34 | -2.39 | 1.52 | 4.59E-04 | CAMKMT(dist=125361), SIX3-AS1(dist=42201)      | intergenic     |
| 1  | 228393465 | C | G | rs74142647                         | 2.60E-01 | 0.054 | 0.045 | 1.21 | 0.84 | -1.75 | 4.29E-05 | 0.085 | 0.046 | 1.90 | 1.34 | -2.68 | 1.77 | 4.59E-04 | C1orf145                                       | ncRNA_exonic   |
| 14 | 78280344  | C | G | rs141469191                        | 2.06E-01 | 0.040 | 0.030 | 1.34 | 0.87 | -2.06 | 3.35E-05 | 0.058 | 0.033 | 1.82 | 1.21 | -2.73 | 2.18 | 4.60E-04 | ADCK1                                          | intronic       |
| 7  | 13390688  | G | A | rs138089077                        | 3.21E-01 | 0.040 | 0.035 | 1.15 | 0.75 | -1.75 | 7.32E-06 | 0.067 | 0.030 | 2.29 | 1.55 | -3.37 | 1.92 | 4.61E-04 | ARL4A(dist=660130), ETV1(dist=540168)          | intergenic     |
| 2  | 22952657  | T | A | rs13387678                         | 1.46E-05 | 0.086 | 0.048 | 1.88 | 1.38 | -2.57 | 8.0      |       |       |      |      |       |      |          |                                                |                |

|    |           |   |   |                        |          |       |       |      |      |       |          |       |       |      |      |       |      |          |                                                 |                |
|----|-----------|---|---|------------------------|----------|-------|-------|------|------|-------|----------|-------|-------|------|------|-------|------|----------|-------------------------------------------------|----------------|
| 2  | 44549204  | A | G | rs2241870              | 3.12E-01 | 0.220 | 0.196 | 0.87 | 0.71 | -1.06 | 1.99E-05 | 0.276 | 0.203 | 0.67 | 0.54 | -0.83 | 0.75 | 4.83E-04 | PREPL                                           | intronic       |
| 2  | 82270138  | A | G | rs2711444              | 5.23E-05 | 0.109 | 0.067 | 0.59 | 0.45 | -0.77 | 4.90E-01 | 0.088 | 0.078 | 0.88 | 0.63 | -1.23 | 0.65 | 4.83E-04 | LOC100507201(dist=576068), LOC1720(dist=813789) | intergenic     |
| 3  | 110189510 | G | A | rs938153               | 4.02E-06 | 0.136 | 0.090 | 0.63 | 0.49 | -0.81 | 9.78E-01 | 0.103 | 0.095 | 0.91 | 0.67 | -1.24 | 0.67 | 4.83E-04 | MIR4445(dist=867766), PVRL3-AS1(dist=574653)    | intergenic     |
| 11 | 68024550  | G | A | rs35151002             | 3.47E-01 | 0.164 | 0.142 | 1.18 | 0.95 | -1.48 | 3.85E-05 | 0.232 | 0.167 | 1.51 | 1.2  | -1.88 | 1.36 | 4.83E-04 | SUV420H1(dist=43311), C11orf24(dist=4253)       | intergenic     |
| 18 | 66505550  | A | G | rs8099721              | 2.47E-05 | 0.071 | 0.039 | 1.86 | 1.32 | -2.6  | 8.78E-01 | 0.041 | 0.039 | 1.06 | 0.66 | -1.69 | 1.84 | 4.84E-04 | CCDC102B                                        | intronic       |
| 4  | 176315580 | C | A | rs116292445            | 4.21E-01 | 0.024 | 0.022 | 1.12 | 0.65 | -1.91 | 2.82E-07 | 0.041 | 0.020 | 2.06 | 1.27 | -3.36 | 3.09 | 4.85E-04 | ADAM29(dist=416249), GPM6A(dist=238508)         | intergenic     |
| 20 | 52825137  | G | C | rs59783244             | 3.25E-01 | 0.036 | 0.028 | 1.28 | 0.82 | -2    | 4.42E-06 | 0.062 | 0.038 | 1.66 | 1.11 | -2.46 | 2.28 | 4.87E-04 | PCFN4                                           | intronic       |
| 2  | 82288186  | T | G | rs2711440              | 5.28E-05 | 0.106 | 0.064 | 0.58 | 0.44 | -0.76 | 4.86E-01 | 0.088 | 0.079 | 0.88 | 0.63 | -1.23 | 0.65 | 4.87E-04 | LOC100507201(dist=594116), LOC1720(dist=795741) | intergenic     |
| 6  | 32445691  | C | T | rs9378212              | 4.90E-05 | 0.219 | 0.285 | 0.70 | 0.58 | -0.85 | 3.38E-01 | 0.261 | 0.288 | 0.87 | 0.71 | -1.08 | 0.77 | 4.90E-04 | HLA-DRA(dist=32865), HLA-DRB5(dist=39463)       | intergenic     |
| 6  | 128576916 | C | T | rs10217106             | 7.40E-06 | 0.057 | 0.023 | 2.51 | 1.7  | -3.72 | 9.42E-01 | 0.034 | 0.038 | 0.89 | 0.53 | -1.48 | 1.99 | 4.91E-04 | CASC8(dist=82532), CASC11(dist=135937)          | intergenic     |
| 8  | 32447219  | G | A | rs386699380;rs28732246 | 4.62E-05 | 0.207 | 0.272 | 0.70 | 0.57 | -0.85 | 3.25E-01 | 0.262 | 0.290 | 0.87 | 0.7  | -1.07 | 0.76 | 4.91E-04 | HLA-DRA(dist=34393), HLA-DRB5(dist=37935)       | intergenic     |
| 6  | 32447216  | A | T | rs29001620;rs386699380 | 4.62E-05 | 0.207 | 0.272 | 0.70 | 0.57 | -0.85 | 3.25E-01 | 0.262 | 0.290 | 0.87 | 0.7  | -1.07 | 0.76 | 4.91E-04 | HLA-DRA(dist=34390), HLA-DRB5(dist=37938)       | intergenic     |
| 6  | 32510219  | A | G | rs28794266             | 3.92E-05 | 0.342 | 0.284 | 0.76 | 0.64 | -0.91 | 3.13E-01 | 0.275 | 0.254 | 0.90 | 0.73 | -1.1  | 0.74 | 4.92E-04 | HLA-DRB5(dist=12213), HLA-DRB6(dist=10271)      | intergenic     |
| 3  | 40383114  | T | C | rs57188311             | 3.73E-05 | 0.309 | 0.405 | 0.66 | 0.55 | -0.78 | 6.52E-01 | 0.327 | 0.324 | 1.01 | 0.83 | -1.24 | 0.79 | 4.94E-04 | EIF1B(dist=29199), ENTPD3(dist=45533)           | intergenic     |
| 1  | 152944594 | C | T | rs3170863              | 1.73E-05 | 0.284 | 0.203 | 0.64 | 0.54 | -0.78 | 6.24E-01 | 0.230 | 0.227 | 0.98 | 0.79 | -1.23 | 0.76 | 4.94E-04 | SPRR4                                           | exonic         |
| 10 | 42606751  | A | G | rs28404483             | 5.46E-06 | 0.197 | 0.136 | 0.64 | 0.52 | -0.79 | 6.50E-01 | 0.201 | 0.195 | 0.96 | 0.76 | -1.21 | 0.69 | 4.96E-04 | NONE(dist=NONE), LOC441666(dist=220563)         | intergenic     |
| 7  | 143149253 | C | T | rs1014070              | 1.81E-05 | 0.076 | 0.136 | 0.52 | 0.39 | -0.7  | 8.50E-01 | 0.107 | 0.108 | 1.00 | 0.74 | -1.35 | 0.71 | 4.96E-04 | EPHA1-AS1                                       | ncRNA_intronic |
| 6  | 32447162  | G | A | rs29001478             | 4.22E-05 | 0.207 | 0.272 | 0.70 | 0.57 | -0.85 | 3.40E-01 | 0.261 | 0.288 | 0.87 | 0.71 | -1.08 | 0.76 | 4.97E-04 | HLA-DRA(dist=34336), HLA-DRB5(dist=37992)       | intergenic     |
| 14 | 71114888  | G | A | rs17176552             | 3.41E-05 | 0.152 | 0.093 | 1.74 | 1.37 | -2.21 | 5.88E-01 | 0.112 | 0.109 | 1.03 | 0.77 | -1.39 | 1.46 | 5.03E-04 | TTC9                                            | intronic       |
| 7  | 41245474  | C | A | rs73687959             | 1.91E-01 | 0.101 | 0.089 | 1.14 | 0.87 | -1.5  | 4.03E-05 | 0.133 | 0.083 | 1.71 | 1.29 | -2.26 | 1.52 | 5.04E-04 | LINC01449(dist=72375), INHBA(dist=483127)       | intergenic     |
| 2  | 81081357  | T | A | rs191226230            | 2.70E-05 | 0.048 | 0.024 | 2.02 | 1.34 | -3.04 | 7.65E-01 | 0.024 | 0.021 | 1.15 | 0.62 | -2.14 | 2.25 | 5.04E-04 | CTNNA2(dist=205369), LOC100507201(dist=607126)  | intergenic     |
| 6  | 129253713 | A | G | rs11966354             | 4.01E-05 | 0.176 | 0.123 | 1.52 | 1.22 | -1.9  | 4.17E-01 | 0.137 | 0.117 | 1.20 | 0.91 | -1.57 | 1.42 | 5.04E-04 | LAMA2                                           | intronic       |
| 2  | 22950673  | G | A | rs13389390             | 1.51E-05 | 0.086 | 0.048 | 1.88 | 1.38 | -2.57 | 8.23E-01 | 0.050 | 0.045 | 1.12 | 0.72 | -1.72 | 1.67 | 5.07E-04 | LOC102723362(dist=189514), KLHL29(dist=657625)  | intergenic     |
| 6  | 32480334  | C | A | rs113072646            | 3.25E-05 | 0.149 | 0.200 | 0.70 | 0.56 | -0.88 | 3.31E-01 | 0.191 | 0.211 | 0.89 | 0.7  | -1.12 | 0.70 | 5.10E-04 | HLA-DRA(dist=67508), HLA-DRB5(dist=4820)        | intergenic     |
| 7  | 41245063  | T | C | rs73687958             | 1.96E-01 | 0.100 | 0.089 | 1.14 | 0.87 | -1.5  | 3.87E-05 | 0.134 | 0.083 | 1.71 | 1.29 | -2.26 | 1.52 | 5.10E-04 | LINC01449(dist=71964), INHBA(dist=483538)       | intergenic     |
| 6  | 129248771 | T | C | rs73773564             | 4.39E-05 | 0.177 | 0.124 | 1.52 | 1.22 | -1.89 | 4.12E-01 | 0.138 | 0.118 | 1.20 | 0.91 | -1.57 | 1.41 | 5.13E-04 | LAMA2                                           | intronic       |
| 16 | 51506117  | G | A | rs2216067              | 2.39E-05 | 0.171 | 0.122 | 1.49 | 1.19 | -1.86 | 8.20E-01 | 0.125 | 0.119 | 1.06 | 0.8  | -1.4  | 1.46 | 5.15E-04 | SALL1(dist=320934), LINC01571(dist=290313)      | intergenic     |
| 2  | 82284078  | T | A | rs1568521              | 5.85E-05 | 0.106 | 0.065 | 0.58 | 0.44 | -0.77 | 4.86E-01 | 0.088 | 0.079 | 0.88 | 0.63 | -1.23 | 0.65 | 5.20E-04 | LOC100507201(dist=590008), LOC1720(dist=799849) | intergenic     |
| 6  | 32447341  | G | A | rs29001568             | 4.53E-05 | 0.208 | 0.272 | 0.70 | 0.57 | -0.85 | 3.42E-01 | 0.261 | 0.288 | 0.87 | 0.71 | -1.08 | 0.76 | 5.24E-04 | HLA-DRA(dist=34515), HLA-DRB5(dist=37813)       | intergenic     |
| 10 | 113659796 | A | G | rs114481757            | 2.38E-01 | 0.035 | 0.029 | 1.19 | 0.76 | -1.87 | 1.65E-05 | 0.052 | 0.024 | 2.27 | 1.47 | -3.51 | 2.15 | 5.28E-04 | ADRA2A(dist=819134), GPAM(dist=249826)          | intergenic     |
| 5  | 100805612 | A | G | rs390021               | 2.11E-05 | 0.320 | 0.230 | 1.57 | 1.32 | -1.88 | 5.97E-01 | 0.273 | 0.276 | 0.99 | 0.8  | -1.22 | 1.31 | 5.32E-04 | ST8SIA4(dist=566623), SLC04C1(dist=764080)      | intergenic     |
| 12 | 45852771  | A | G | rs11183056             | 1.17E-06 | 0.585 | 0.478 | 1.54 | 1.3  | -1.81 | 7.69E-01 | 0.513 | 0.493 | 0.92 | 0.77 | -1.11 | 1.25 | 5.34E-04 | ANO6(dist=18584), LINC00938(dist=266732)        | intergenic     |
| 6  | 32449293  | A | G | rs5018660              | 4.27E-05 | 0.183 | 0.243 | 0.70 | 0.57 | -0.86 | 3.24E-01 | 0.252 | 0.280 | 0.87 | 0.7  | -1.08 | 0.75 | 5.36E-04 | HLA-DRA(dist=36467), HLA-DRB5(dist=35861)       | intergenic     |
| 3  | 110158589 | T | C | rs58939217             | 2.53E-05 | 0.066 | 0.036 | 1.90 | 1.33 | -2.7  | 6.71E-01 | 0.046 | 0.038 | 1.22 | 0.78 | -1.92 | 1.80 | 5.36E-04 | MIR4445(dist=836845), PVRL3-AS1(dist=605574)    | intergenic     |
| 7  | 143184792 | T | G | rs4726626              | 3.27E-05 | 0.065 | 0.118 | 0.52 | 0.38 | -0.72 | 7.71E-01 | 0.093 | 0.097 | 0.95 | 0.69 | -1.31 | 0.69 | 5.40E-04 | EPHA1-AS1                                       | ncRNA_intronic |
| 5  | 124293144 | T | C | rs386692020;rs7382531  | 1.25E-06 | 0.014 | 0.056 | 0.23 | 0.12 | -0.45 | 9.27E-01 | 0.046 | 0.044 | 1.05 | 0.67 | -1.64 | 0.57 | 5.41E-04 | ZNF608(dist=212339), LOC101927421(dist=79380)   | intergenic     |
| 7  | 143203126 | T | C | rs2077838              | 1.16E-05 | 0.064 | 0.120 | 0.50 | 0.37 | -0.69 | 9.56E-01 | 0.098 | 0.097 | 1.01 | 0.73 | -1.38 | 0.69 | 5.44E-04 | EPHA1-AS1                                       | ncRNA_intronic |
| 5  | 100750867 | C | T | rs980831               | 6.35E-05 | 0.196 | 0.274 | 0.65 | 0.53 | -0.79 | 4.13E-01 | 0.239 | 0.246 | 0.96 | 0.77 | -1.2  | 0.77 | 5.44E-04 | ST8SIA4(dist=511878), SLC04C1(dist=818825)      | intergenic     |
| 6  | 169006691 | C | T | rs115752459            | 3.71E-05 | 0.056 | 0.029 | 1.94 | 1.33 | -2.85 | 6.01E-01 | 0.033 | 0.028 | 1.19 | 0.7  | -2.01 | 2.12 | 5.51E-04 | SMOC2                                           | intronic       |
| 10 | 34925009  | C | A | rs2812798              | 3.49E-05 | 0.133 | 0.085 | 0.60 | 0.47 | -0.77 | 4.86E-01 | 0.113 | 0.103 | 0.90 | 0.67 | -1.22 | 0.68 | 5.52E-04 | HNRNPF(dist=20313), ZNF487(dist=7565)           | intergenic     |
| 21 | 24355684  | G | T | rs62210676             | 2.86E-01 | 0.033 | 0.026 | 1.29 | 0.81 | -2.06 | 7.85E-06 | 0.054 | 0.034 | 1.59 | 1.04 | -2.43 | 2.44 | 5.54E-04 | LINC00308(dist=866837), D21S2088E(dist=377742)  | intergenic     |
| 2  | 106091635 | T | C | rs60135141             | 2.06E-05 | 0.048 | 0.025 | 1.95 | 1.29 | -2.93 | 7.51E-01 | 0.028 | 0.025 | 1.14 | 0.64 | -2.01 | 2.25 | 5.56E-04 | FHL2(dist=36405), LOC285000(dist=117919)        | intergenic     |
| 11 | 68034256  | G | A | rs10791970             | 3.50E-01 | 0.161 | 0.140 | 1.18 | 0.94 | -1.48 | 5.00E-05 | 0.231 | 0.166 | 1.51 | 1.2  | -1.88 | 1.35 | 5.63E-04 | C11orf24                                        | intronic       |
| 3  | 40385778  | A | G | rs7628748              | 4.19E-05 | 0.346 | 0.445 | 0.66 | 0.56 | -0.78 | 6.53E-01 | 0.367 | 0.362 | 1.02 | 0.84 | -1.24 | 0.79 | 5.63E-04 | EIF1B(dist=31863), ENTPD3(dist=42869)           | intergenic     |
| 3  | 40392083  | C | T | rs9824853              | 4.10E-05 | 0.346 | 0.445 | 0.66 | 0.56 | -0.78 | 6.16E-01 | 0.367 | 0.362 | 1.02 | 0.84 | -1.24 | 0.79 | 5.64E-04 | EIF1B(dist=38168), ENTPD3(dist=36564)           | intergenic     |
| 17 | 65082917  | T | C | rs73340976             | 5.02E-01 | 0.025 | 0.022 | 1.15 | 0.67 | -1.95 | 2.63E-06 | 0.054 | 0.023 | 2.44 | 1.58 | -3.76 | 2.23 | 5.64E-04 | HELZ                                            | intronic       |
| 10 | 14471473  | C | T | rs10906671             | 1.64E-05 | 0.073 | 0.037 | 2.06 | 1.47 | -2.89 | 6.80E-01 | 0.049 | 0.046 | 1.07 | 0.7  | -1.65 | 1.78 | 5.65E-04 | MIR4293(dist=46197), MIR1265(dist=7102)         | intergenic     |
| 5  | 100755580 | G | C | rs73165906             | 6.50E-05 | 0.198 | 0.276 | 0.65 | 0.53 | -0.79 | 4.20E-01 | 0.240 | 0.246 | 0.97 | 0.78 | -1.2  | 0.77 | 5.68E-04 | ST8SIA4(dist=516591), SLC04C1(dist=814112)      | intergenic     |
| 14 | 96147199  | G | A | rs138309063            | 2.39E-01 | 0.043 | 0.037 | 1.16 | 0.77 | -1.74 | 6.14E-06 | 0.062 | 0.036 | 1.75 | 1.18 | -2.6  | 2.37 | 5.69E-04 | TCL6(dist=7410), TCL1B(dist=5555)               | intergenic     |
| 3  | 40386891  | A | G | rs9835312              | 4.21E-05 | 0.346 | 0.445 | 0.66 | 0.56 | -0.78 | 6.56E-01 | 0.366 | 0.362 | 1.02 | 0.84 | -1.24 | 0.79 | 5.69E-04 | EIF1B(dist=32976), ENTPD3(dist=41756)           | intergenic     |
| 11 | 68034772  | A | G | rs10791971             | 3.68E-01 | 0.161 | 0.140 | 1.18 | 0.94 | -1.48 | 4.68E-05 | 0.231 | 0.166 | 1.51 | 1.21 | -1.89 | 1.36 | 5.70E-04 | C11orf24                                        | intronic       |
| 2  | 45130224  | C | T | rs74823585             | 1.92E-01 | 0.103 | 0.090 | 1.12 | 0.86 | -1.47 | 2.30E-05 | 0.124 | 0.074 | 1.77 | 1.33 | -2.37 | 1.51 | 5.70E-04 | CAMKMT(dist=130493), SIX3-AS1(dist=37069)       | intergenic     |
| 17 | 65072054  | T | A | rs73340967             | 5.01E-01 | 0.025 | 0.022 | 1.15 | 0.68 | -1.95 | 2.70E-06 | 0.053 | 0.023 | 2.44 | 1.58 | -3.76 | 2.23 | 5.72E-04 | HELZ(NM_014877:c.2314A>T)                       | UTR3           |
| 17 | 69074612  | C | A | rs182156119            | 2.22E-01 | 0.029 | 0.026 | 1.13 | 0.69 | -1.85 | 1.83E-05 | 0.041 | 0.022 | 1.87 | 1.15 | -3.04 | 2.91 | 5.75E-04 | KCNJ2(dist=898429), CASC17(dist=19303)          | intergenic     |
| 4  | 138743944 | G | A | rs978890               | 5.33E-05 | 0.102 | 0.161 | 1.69 | 1.3  | -2.2  | 5.69E-01 | 0.131 | 0.140 | 1.08 | 0.82 | -1.42 | 1.38 | 5.76E-04 | PCDH18(dist=290292), LINC00616(dist=204633)     | intergenic     |
| 10 | 50587822  | A | G | rs17783577             | 2.15E-01 | 0.059 | 0.047 | 1.27 | 0.89 | -1.81 |          |       |       |      |      |       |      |          |                                                 |                |



|    |           |   |   |                        |          |       |       |      |      |       |          |       |       |      |      |       |      |          |                                                |                |
|----|-----------|---|---|------------------------|----------|-------|-------|------|------|-------|----------|-------|-------|------|------|-------|------|----------|------------------------------------------------|----------------|
| 13 | 93122756  | C | T | rs74462622             | 2.77E-07 | 0.099 | 0.055 | 1.88 | 1.41 | -2.51 | 5.80E-01 | 0.060 | 0.063 | 0.95 | 0.64 | -1.41 | 1.64 | 6.03E-04 | GPC5                                           | intronic       |
| 3  | 133729578 | C | T | rs150831364            | 4.73E-01 | 0.036 | 0.034 | 1.06 | 0.68 | -1.64 | 5.89E-08 | 0.049 | 0.021 | 2.33 | 1.48 | -3.67 | 2.42 | 6.04E-04 | SLCO2A1                                        | intronic       |
| 7  | 143208225 | G | A | rs10260451             | 8.12E-06 | 0.071 | 0.128 | 0.52 | 0.38 | -0.7  | 8.23E-01 | 0.109 | 0.106 | 1.03 | 0.76 | -1.39 | 0.70 | 6.07E-04 | EPHA1-AS1                                      | ncRNA_intronic |
| 13 | 71312366  | T | C | rs4883879              | 2.58E-01 | 0.104 | 0.082 | 1.29 | 0.98 | -1.69 | 5.38E-05 | 0.158 | 0.111 | 1.51 | 1.17 | -1.96 | 1.48 | 6.13E-04 | ATXN8OS(dist=598481), LINC00348(dist=276907)   | intergenic     |
| 7  | 143174630 | C | T | rs13362832             | 3.72E-05 | 0.067 | 0.119 | 0.53 | 0.39 | -0.73 | 7.87E-01 | 0.092 | 0.096 | 0.96 | 0.69 | -1.32 | 0.70 | 6.14E-04 | EPHA1-AS1                                      | ncRNA_intronic |
| 21 | 24407361  | T | G | rs62208529             | 3.70E-01 | 0.031 | 0.024 | 1.28 | 0.79 | -2.06 | 9.05E-07 | 0.051 | 0.032 | 1.62 | 1.05 | -2.5  | 2.54 | 6.14E-04 | LINC00308(dist=918514), D21S2088E(dist=326065) | intergenic     |
| 6  | 32445117  | C | T | rs28895258             | 5.38E-05 | 0.206 | 0.273 | 0.69 | 0.57 | -0.85 | 3.80E-01 | 0.261 | 0.287 | 0.88 | 0.71 | -1.09 | 0.77 | 6.14E-04 | HLA-DRA(dist=32291), HLA-DRB5(dist=40037)      | intergenic     |
| 6  | 32445114  | A | G | rs28895257             | 5.38E-05 | 0.206 | 0.273 | 0.69 | 0.57 | -0.85 | 3.80E-01 | 0.261 | 0.287 | 0.88 | 0.71 | -1.09 | 0.77 | 6.14E-04 | HLA-DRA(dist=32288), HLA-DRB5(dist=40040)      | intergenic     |
| 7  | 143204680 | G | A | rs10266402             | 1.29E-05 | 0.062 | 0.116 | 0.50 | 0.36 | -0.7  | 9.47E-01 | 0.096 | 0.096 | 1.01 | 0.73 | -1.38 | 0.69 | 6.15E-04 | EPHA1-AS1                                      | ncRNA_intronic |
| 3  | 110356886 | T | G | rs28629258             | 5.01E-05 | 0.062 | 0.034 | 1.88 | 1.31 | -2.69 | 5.79E-01 | 0.043 | 0.034 | 1.25 | 0.78 | -1.99 | 1.82 | 6.21E-04 | MIR4445(dist=1035142), PVRL3-AS1(dist=407277)  | intergenic     |
| 6  | 14765162  | C | T | rs731187               | 1.21E-05 | 0.343 | 0.407 | 0.76 | 0.64 | -0.9  | 6.30E-01 | 0.393 | 0.420 | 0.89 | 0.74 | -1.08 | 0.78 | 6.21E-04 | LINC01108(dist=479477), JARID2(dist=481044)    | intergenic     |
| 11 | 117480556 | G | C | rs79738719             | 4.49E-01 | 0.055 | 0.050 | 1.10 | 0.76 | -1.57 | 1.38E-06 | 0.083 | 0.043 | 1.99 | 1.4  | -2.83 | 1.76 | 6.22E-04 | DSCAML1                                        | intronic       |
| 13 | 49229496  | C | G | rs147346338            | 5.09E-05 | 0.048 | 0.023 | 2.11 | 1.39 | -3.19 | 6.92E-01 | 0.025 | 0.021 | 1.19 | 0.65 | -2.17 | 2.10 | 6.23E-04 | LINC00462(dist=74459), CYSLTR2(dist=51455)     | intergenic     |
| 2  | 47752597  | C | T | rs116781195            | 2.73E-05 | 0.057 | 0.033 | 1.77 | 1.22 | -2.57 | 7.13E-01 | 0.038 | 0.034 | 1.13 | 0.69 | -1.85 | 2.11 | 6.23E-04 | KCNK12                                         | intronic       |
| 10 | 50583323  | A | C | rs78422967;rs386743572 | 2.30E-01 | 0.059 | 0.047 | 1.26 | 0.89 | -1.8  | 4.66E-05 | 0.082 | 0.045 | 1.89 | 1.33 | -2.68 | 1.73 | 6.24E-04 | DRGX                                           | intronic       |
| 2  | 44549229  | G | A | rs2241869              | 3.22E-01 | 0.219 | 0.196 | 0.87 | 0.71 | -1.06 | 3.51E-05 | 0.276 | 0.204 | 0.67 | 0.54 | -0.83 | 0.76 | 6.27E-04 | PREPL                                          | intronic       |
| 10 | 50583324  | G | C | rs386743572;rs75250402 | 2.35E-01 | 0.058 | 0.047 | 1.26 | 0.88 | -1.8  | 4.35E-05 | 0.081 | 0.045 | 1.89 | 1.33 | -2.68 | 1.73 | 6.27E-04 | DRGX                                           | intronic       |
| 4  | 176314422 | G | T | rs114424961            | 4.51E-01 | 0.024 | 0.022 | 1.10 | 0.65 | -1.89 | 3.99E-07 | 0.041 | 0.020 | 2.07 | 1.27 | -3.37 | 2.97 | 6.29E-04 | ADAM29(dist=415091), GPM6A(dist=239666)        | intergenic     |
| 3  | 40385335  | C | T | rs9863318              | 5.39E-05 | 0.314 | 0.409 | 0.66 | 0.56 | -0.79 | 6.55E-01 | 0.328 | 0.325 | 1.01 | 0.83 | -1.24 | 0.79 | 6.32E-04 | E1F1B(dist=31420), ENTPD3(dist=43312)          | intergenic     |
| 3  | 40384102  | T | C | rs60006678             | 5.39E-05 | 0.314 | 0.409 | 0.66 | 0.56 | -0.79 | 6.55E-01 | 0.328 | 0.325 | 1.01 | 0.83 | -1.24 | 0.79 | 6.32E-04 | E1F1B(dist=30187), ENTPD3(dist=44545)          | intergenic     |
| 14 | 71111361  | A | G | rs7160510              | 3.13E-05 | 0.151 | 0.092 | 1.75 | 1.38 | -2.22 | 6.94E-01 | 0.108 | 0.107 | 1.01 | 0.75 | -1.36 | 1.45 | 6.32E-04 | TTC9                                           | intronic       |
| 3  | 40384158  | G | C | rs60924403             | 5.39E-05 | 0.314 | 0.409 | 0.66 | 0.56 | -0.79 | 6.55E-01 | 0.328 | 0.325 | 1.01 | 0.83 | -1.24 | 0.79 | 6.32E-04 | E1F1B(dist=30243), ENTPD3(dist=44489)          | intergenic     |
| 3  | 40385568  | C | T | rs9867329              | 5.40E-05 | 0.314 | 0.409 | 0.66 | 0.56 | -0.79 | 6.55E-01 | 0.328 | 0.325 | 1.01 | 0.83 | -1.24 | 0.79 | 6.32E-04 | E1F1B(dist=31653), ENTPD3(dist=43079)          | intergenic     |
| 3  | 40386306  | G | A | rs57008021             | 5.40E-05 | 0.314 | 0.409 | 0.66 | 0.56 | -0.79 | 6.56E-01 | 0.328 | 0.325 | 1.01 | 0.83 | -1.24 | 0.79 | 6.33E-04 | E1F1B(dist=32391), ENTPD3(dist=42341)          | intergenic     |
| 3  | 40386653  | T | C | rs60286832             | 5.39E-05 | 0.314 | 0.409 | 0.66 | 0.56 | -0.79 | 6.57E-01 | 0.328 | 0.325 | 1.01 | 0.83 | -1.24 | 0.79 | 6.34E-04 | E1F1B(dist=32738), ENTPD3(dist=41994)          | intergenic     |
| 10 | 12890638  | G | A | rs7917616              | 3.51E-05 | 0.070 | 0.038 | 1.93 | 1.37 | -2.71 | 7.47E-01 | 0.037 | 0.033 | 1.12 | 0.68 | -1.85 | 1.84 | 6.36E-04 | CAMK1D(dist=13093), CCDC3(dist=47987)          | intergenic     |
| 3  | 40390027  | C | T | rs9814108              | 5.40E-05 | 0.314 | 0.408 | 0.66 | 0.56 | -0.79 | 6.61E-01 | 0.328 | 0.325 | 1.01 | 0.83 | -1.24 | 0.79 | 6.42E-04 | E1F1B(dist=36112), ENTPD3(dist=38620)          | intergenic     |
| 3  | 40390608  | A | G | rs9856326              | 5.41E-05 | 0.314 | 0.408 | 0.66 | 0.56 | -0.79 | 6.61E-01 | 0.328 | 0.325 | 1.01 | 0.83 | -1.24 | 0.79 | 6.44E-04 | E1F1B(dist=36693), ENTPD3(dist=38039)          | intergenic     |
| 17 | 65098976  | C | T | rs73340996             | 5.50E-01 | 0.025 | 0.022 | 1.12 | 0.66 | -1.91 | 2.13E-06 | 0.054 | 0.023 | 2.45 | 1.59 | -3.77 | 2.19 | 6.45E-04 | HELZ                                           | intronic       |
| 1  | 116412002 | C | T | rs1775519              | 1.78E-06 | 0.344 | 0.449 | 0.64 | 0.54 | -0.76 | 7.15E-01 | 0.411 | 0.397 | 1.06 | 0.87 | -1.28 | 0.79 | 6.45E-04 | NHLH2(dist=28255), LOC101928995(dist=49995)    | intergenic     |
| 3  | 40374264  | C | A | rs28642330             | 5.12E-05 | 0.313 | 0.408 | 0.66 | 0.56 | -0.79 | 6.59E-01 | 0.328 | 0.325 | 1.01 | 0.83 | -1.24 | 0.79 | 6.46E-04 | E1F1B(dist=20349), ENTPD3(dist=54383)          | intergenic     |
| 10 | 42483018  | T | G | rs9732495              | 6.28E-05 | 0.300 | 0.231 | 1.43 | 1.19 | -1.71 | 5.84E-01 | 0.256 | 0.246 | 1.06 | 0.85 | -1.31 | 1.32 | 6.49E-04 | NONE(dist=NONE), LOC441666(dist=344296)        | intergenic     |
| 14 | 71121853  | G | A | rs61980469             | 1.61E-05 | 0.179 | 0.116 | 1.66 | 1.33 | -2.07 | 5.26E-01 | 0.160 | 0.158 | 1.02 | 0.79 | -1.31 | 1.40 | 6.50E-04 | TTC9                                           | intronic       |
| 5  | 100778894 | T | A | rs349325               | 2.93E-05 | 0.289 | 0.208 | 1.55 | 1.29 | -1.86 | 6.05E-01 | 0.242 | 0.245 | 0.99 | 0.79 | -1.23 | 1.33 | 6.51E-04 | ST8SIA4(dist=539905), SLCO4C1(dist=790798)     | intergenic     |
| 17 | 6680459   | A | G | rs6502982              | 4.25E-05 | 0.457 | 0.376 | 0.72 | 0.61 | -0.85 | 7.60E-01 | 0.433 | 0.437 | 1.01 | 0.84 | -1.22 | 0.77 | 6.53E-04 | FBXO39                                         | intronic       |
| 1  | 116412055 | C | G | rs1767258              | 8.26E-06 | 0.570 | 0.468 | 0.66 | 0.56 | -0.78 | 9.74E-01 | 0.475 | 0.466 | 1.03 | 0.86 | -1.25 | 0.79 | 6.55E-04 | NHLH2(dist=28308), LOC101928995(dist=49942)    | intergenic     |
| 4  | 3792209   | C | T | rs4076725              | 3.46E-01 | 0.449 | 0.424 | 0.90 | 0.77 | -1.06 | 1.59E-05 | 0.545 | 0.467 | 0.73 | 0.61 | -0.88 | 0.78 | 6.55E-04 | ADRA2C(dist=21956), FAM86EP(dist=151278)       | intergenic     |
| 17 | 41078398  | G | T | rs150339733            | 2.11E-01 | 0.056 | 0.047 | 1.21 | 0.84 | -1.73 | 4.57E-05 | 0.071 | 0.037 | 1.99 | 1.37 | -2.9  | 1.79 | 6.59E-04 | G6PC(dist=11948), AARSD1(dist=24145)           | intergenic     |
| 7  | 143164726 | T | G | rs4573172              | 5.62E-05 | 0.062 | 0.113 | 0.52 | 0.38 | -0.72 | 7.08E-01 | 0.089 | 0.095 | 0.94 | 0.68 | -1.3  | 0.70 | 6.60E-04 | EPHA1-AS1                                      | ncRNA_intronic |
| 3  | 89920470  | A | C | rs187738305            | 1.61E-01 | 0.041 | 0.034 | 1.19 | 0.79 | -1.82 | 2.10E-05 | 0.043 | 0.020 | 2.15 | 1.33 | -3.47 | 2.32 | 6.63E-04 | EPHA3(dist=389186), NONE(dist=NONE)            | intergenic     |
| 3  | 142942042 | T | A | rs2165521              | 4.01E-05 | 0.156 | 0.218 | 1.50 | 1.21 | -1.87 | 6.87E-01 | 0.193 | 0.206 | 1.08 | 0.85 | -1.37 | 1.32 | 6.65E-04 | CHST2(dist=99186), SLC9A9(dist=42022)          | intergenic     |
| 5  | 143229147 | A | G | rs11743230             | 4.38E-05 | 0.110 | 0.070 | 1.65 | 1.26 | -2.17 | 5.13E-01 | 0.107 | 0.100 | 1.08 | 0.8  | -1.46 | 1.59 | 6.67E-04 | HMB1(dist=28863), YIPF5(dist=308576)           | intergenic     |
| 7  | 138747732 | G | A | rs57352501             | 2.00E-05 | 0.309 | 0.242 | 1.41 | 1.18 | -1.68 | 8.91E-01 | 0.250 | 0.244 | 1.04 | 0.84 | -1.29 | 1.32 | 6.67E-04 | ZC3HAV1                                        | intronic       |
| 5  | 100777966 | C | T | rs164444               | 3.32E-05 | 0.309 | 0.223 | 1.56 | 1.3  | -1.87 | 5.98E-01 | 0.260 | 0.263 | 0.98 | 0.79 | -1.21 | 1.31 | 6.67E-04 | ST8SIA4(dist=538977), SLCO4C1(dist=791726)     | intergenic     |
| 7  | 143166448 | C | T | rs17164309             | 5.30E-05 | 0.062 | 0.113 | 0.52 | 0.37 | -0.72 | 7.27E-01 | 0.090 | 0.095 | 0.94 | 0.68 | -1.31 | 0.70 | 6.71E-04 | EPHA1-AS1                                      | ncRNA_intronic |
| 11 | 134594653 | C | T | rs4937940              | 5.93E-05 | 0.053 | 0.027 | 2.05 | 1.39 | -3.04 | 5.78E-01 | 0.035 | 0.030 | 1.19 | 0.72 | -1.98 | 1.97 | 6.73E-04 | LOC283177(dist=219098), NONE(dist=NONE)        | intergenic     |
| 7  | 143154185 | G | A | rs2140786              | 1.69E-05 | 0.080 | 0.141 | 0.53 | 0.4  | -0.71 | 9.91E-01 | 0.110 | 0.108 | 1.01 | 0.75 | -1.37 | 0.71 | 6.76E-04 | EPHA1-AS1                                      | ncRNA_intronic |
| 6  | 129271324 | A | C | rs73773588             | 5.26E-05 | 0.177 | 0.124 | 1.51 | 1.21 | -1.89 | 4.51E-01 | 0.136 | 0.118 | 1.19 | 0.9  | -1.56 | 1.40 | 6.78E-04 | LAMA2                                          | intronic       |
| 10 | 12890993  | T | G | rs149200855            | 3.85E-05 | 0.070 | 0.038 | 1.91 | 1.36 | -2.69 | 7.49E-01 | 0.037 | 0.033 | 1.12 | 0.68 | -1.84 | 1.84 | 6.79E-04 | CAMK1D(dist=13448), CCDC3(dist=47632)          | intergenic     |
| 3  | 40370484  | C | T | rs113198842            | 5.86E-05 | 0.315 | 0.410 | 0.66 | 0.56 | -0.79 | 6.57E-01 | 0.328 | 0.325 | 1.01 | 0.83 | -1.24 | 0.79 | 6.80E-04 | E1F1B(dist=16569), ENTPD3(dist=58163)          | intergenic     |
| 2  | 5977382   | C | A | rs116743720            | 9.82E-02 | 0.044 | 0.034 | 1.29 | 0.86 | -1.93 | 4.52E-05 | 0.047 | 0.025 | 1.91 | 1.21 | -3.02 | 2.08 | 6.81E-04 | SOX11(dist=135865), LINC01105(dist=95437)      | intergenic     |
| 7  | 22001439  | T | A | rs115285242            | 3.86E-01 | 0.056 | 0.050 | 1.14 | 0.8  | -1.63 | 1.60E-06 | 0.074 | 0.035 | 2.20 | 1.52 | -3.18 | 1.77 | 6.82E-04 | CDCA7L(dist=15897), RANGEF5(dist=156469)       | intergenic     |
| 7  | 143211643 | C | A | rs1525122              | 1.83E-05 | 0.066 | 0.120 | 0.52 | 0.38 | -0.71 | 9.66E-01 | 0.098 | 0.097 | 1.00 | 0.73 | -1.37 | 0.69 | 6.83E-04 | EPHA1-AS1                                      | ncRNA_intronic |
| 3  | 40370382  | C | T | rs72860232             | 5.91E-05 | 0.316 | 0.410 | 0.66 | 0.56 | -0.79 | 6.57E-01 | 0.328 | 0.325 | 1.01 | 0.83 | -1.24 | 0.79 | 6.84E-04 | E1F1B(dist=16467), ENTPD3(dist=58265)          | intergenic     |
| 5  | 100618922 | T | C | rs1380391              | 5.82E-05 | 0.309 | 0.392 | 0.69 | 0.58 | -0.82 | 4.75E-01 | 0.361 | 0.367 | 0.98 | 0.8  | -1.19 | 0.80 | 6.84E-04 | ST8SIA4(dist=379933), SLCO4C1(dist=950770)     | intergenic     |
| 13 | 115052395 | C | T | rs141479302            | 3.33E-05 | 0.057 | 0.028 | 2.06 | 1.41 | -3.02 | 8.71E-01 | 0.027 | 0.025 | 1.10 | 0.62 | -1.96 | 1.95 | 6.84E-04 | UPF3A                                          | intronic       |
| 14 | 44191344  | C | T | rs144775179            | 4.69E-01 |       |       |      |      |       |          |       |       |      |      |       |      |          |                                                |                |

|    |           |   |   |                         |          |       |       |      |      |       |          |       |       |      |      |       |      |          |                                                   |                |
|----|-----------|---|---|-------------------------|----------|-------|-------|------|------|-------|----------|-------|-------|------|------|-------|------|----------|---------------------------------------------------|----------------|
| 14 | 63273449  | C | A | rs4441171               | 2.71E-06 | 0.403 | 0.499 | 1.48 | 1.25 | -1.74 | 8.06E-01 | 0.491 | 0.498 | 0.97 | 0.8  | -1.17 | 1.26 | 7.10E-04 | KCNH5                                             | intronic       |
| 6  | 32451570  | C | T | rs13194770              | 5.73E-05 | 0.200 | 0.260 | 0.71 | 0.58 | -0.87 | 3.47E-01 | 0.261 | 0.287 | 0.87 | 0.71 | -1.08 | 0.76 | 7.11E-04 | HLA-DRA(dist=38744), HLA-DRB5(dist=33584)         | intergenic     |
| 16 | 76968405  | C | G | rs11861760              | 2.85E-05 | 0.131 | 0.085 | 1.62 | 1.26 | -2.09 | 8.07E-01 | 0.095 | 0.088 | 1.09 | 0.79 | -1.5  | 1.48 | 7.12E-04 | MIR4719(dist=65489), MON1B(dist=256411)           | intergenic     |
| 18 | 52365136  | G | A | rs76989397              | 2.13E-01 | 0.089 | 0.081 | 1.11 | 0.83 | -1.48 | 5.24E-05 | 0.106 | 0.063 | 1.76 | 1.29 | -2.39 | 1.55 | 7.15E-04 | DYNAP(dist=98412), RAB27B(dist=130572)            | intergenic     |
| 7  | 143206082 | A | T | rs12533151              | 1.93E-05 | 0.065 | 0.120 | 0.51 | 0.38 | -0.71 | 9.60E-01 | 0.098 | 0.097 | 1.00 | 0.73 | -1.38 | 0.70 | 7.15E-04 | EPHA1-AS1                                         | ncRNA_intronic |
| 6  | 129293899 | T | C | rs59063850              | 5.54E-05 | 0.177 | 0.124 | 1.51 | 1.21 | -1.88 | 4.62E-01 | 0.136 | 0.117 | 1.18 | 0.9  | -1.55 | 1.40 | 7.17E-04 | LAMA2                                             | intronic       |
| 7  | 143206819 | G | A | rs4725621               | 1.95E-05 | 0.066 | 0.120 | 0.52 | 0.38 | -0.71 | 9.61E-01 | 0.098 | 0.097 | 1.00 | 0.73 | -1.37 | 0.70 | 7.18E-04 | EPHA1-AS1                                         | ncRNA_intronic |
| 1  | 232378590 | T | A | rs56271908              | 4.80E-05 | 0.056 | 0.056 | 1.63 | 1.2  | -2.2  | 9.45E-01 | 0.045 | 0.044 | 1.03 | 0.65 | -1.61 | 1.83 | 7.26E-04 | TSNAX-DISC1(dist=201571), SIPA1L2(dist=155122)    | intergenic     |
| 18 | 52362681  | G | A | rs111859967             | 2.16E-01 | 0.089 | 0.081 | 1.11 | 0.83 | -1.48 | 5.18E-05 | 0.106 | 0.063 | 1.76 | 1.29 | -2.39 | 1.54 | 7.28E-04 | DYNAP(dist=95957), RAB27B(dist=133027)            | intergenic     |
| 6  | 46811503  | T | C | rs148841609             | 2.90E-05 | 0.041 | 0.021 | 1.98 | 1.27 | -3.08 | 4.49E-01 | 0.029 | 0.023 | 1.28 | 0.73 | -2.23 | 2.42 | 7.29E-04 | MEP1A(dist=3984), ADGRF5(dist=8739)               | intergenic     |
| 13 | 115060945 | A | C | rs146769679             | 4.60E-05 | 0.057 | 0.029 | 2.03 | 1.38 | -2.96 | 8.33E-01 | 0.027 | 0.024 | 1.11 | 0.62 | -1.99 | 1.94 | 7.36E-04 | UPF3A                                             | intronic       |
| 4  | 2791732   | C | G | rs35365158              | 4.08E-01 | 0.074 | 0.065 | 1.15 | 0.84 | -1.58 | 6.01E-06 | 0.118 | 0.078 | 1.57 | 1.17 | -2.11 | 1.68 | 7.37E-04 | TNIP2(dist=33629), SH3BP2(dist=3018)              | intergenic     |
| 5  | 100788078 | G | C | rs349329                | 4.76E-05 | 0.307 | 0.221 | 1.56 | 1.3  | -1.87 | 5.61E-01 | 0.261 | 0.264 | 0.99 | 0.8  | -1.22 | 1.30 | 7.39E-04 | ST8SIA4(dist=549089), SLC04C1(dist=781614)        | intergenic     |
| 1  | 232379997 | C | T | rs74146131              | 4.90E-05 | 0.088 | 0.056 | 1.63 | 1.2  | -2.2  | 9.49E-01 | 0.045 | 0.044 | 1.03 | 0.65 | -1.61 | 1.82 | 7.41E-04 | TSNAX-DISC1(dist=202978), SIPA1L2(dist=153715)    | intergenic     |
| 7  | 76965957  | C | T | rs11864650              | 3.10E-05 | 0.133 | 0.087 | 1.61 | 1.25 | -2.07 | 8.04E-01 | 0.096 | 0.089 | 1.09 | 0.79 | -1.5  | 1.47 | 7.43E-04 | MIR4719(dist=63041), MON1B(dist=258859)           | intergenic     |
| 10 | 12892823  | C | - |                         | 5.81E-05 | 0.067 | 0.036 | 1.90 | 1.34 | -2.69 | 6.76E-01 | 0.037 | 0.032 | 1.14 | 0.69 | -1.88 | 1.87 | 7.43E-04 | CAMK1D(dist=15278), CCDC3(dist=45802)             | intergenic     |
| 2  | 234524475 | G | A | rs9552563               | 4.26E-01 | 0.187 | 0.173 | 1.10 | 0.89 | -1.36 | 2.21E-05 | 0.246 | 0.168 | 1.62 | 1.3  | -2.02 | 1.33 | 7.50E-04 | USP40(dist=50239), UGT1A8(dist=1816)              | intergenic     |
| 13 | 48056308  | G | C | rs9595721               | 3.83E-05 | 0.095 | 0.162 | 0.54 | 0.42 | -0.71 | 9.41E-01 | 0.130 | 0.123 | 1.07 | 0.81 | -1.41 | 0.71 | 7.51E-04 | HTR2A(dist=585097), LINC00562(dist=447980)        | intergenic     |
| 6  | 32342691  | C | A | rs7746327               | 4.67E-05 | 0.321 | 0.398 | 0.72 | 0.6  | -0.85 | 4.72E-01 | 0.375 | 0.394 | 0.92 | 0.76 | -1.12 | 0.79 | 7.53E-04 | C6orf10(dist=3002), HCG23(dist=15596)             | intergenic     |
| 8  | 8717232   | T | C | rs332035;rs386722011    | 6.34E-05 | 0.442 | 0.346 | 0.67 | 0.57 | -0.79 | 7.07E-01 | 0.416 | 0.426 | 1.04 | 0.86 | -1.26 | 0.80 | 7.60E-04 | MFHAS1                                            | intronic       |
| 17 | 65261663  | G | A | rs58553014              | 5.73E-01 | 0.023 | 0.021 | 1.09 | 0.63 | -1.9  | 1.53E-05 | 0.053 | 0.023 | 2.37 | 1.53 | -3.66 | 2.28 | 7.62E-04 | HELZ(dist=20344), PSMD12(dist=74956)              | intergenic     |
| 7  | 41251574  | C | T | rs73687961              | 2.59E-01 | 0.091 | 0.083 | 1.12 | 0.84 | -1.48 | 4.26E-05 | 0.128 | 0.078 | 1.72 | 1.29 | -2.29 | 1.53 | 7.64E-04 | LINC01449(dist=78475), INHBA(dist=477027)         | intergenic     |
| 4  | 96534380  | A | G | rs41473747              | 1.13E-05 | 0.195 | 0.138 | 1.52 | 1.23 | -1.87 | 9.52E-01 | 0.147 | 0.144 | 1.03 | 0.79 | -1.34 | 1.37 | 7.67E-04 | UNC5C(dist=64019), PDHA2(dist=226859)             | intergenic     |
| 9  | 22882729  | G | C | rs79624380              | 4.05E-01 | 0.068 | 0.062 | 1.10 | 0.79 | -1.52 | 3.13E-06 | 0.093 | 0.049 | 1.99 | 1.43 | -2.77 | 1.63 | 7.68E-04 | LINC01239(dist=58517), LOC101929563(dist=617960)  | intergenic     |
| 4  | 118417933 | G | A | rs17869442              | 3.07E-05 | 0.051 | 0.024 | 2.19 | 1.46 | -3.3  | 9.51E-01 | 0.024 | 0.023 | 1.06 | 0.58 | -1.95 | 2.06 | 7.70E-04 | LINC01378                                         | ncRNA_intronic |
| 16 | 58243088  | A | G | rs12931839              | 4.14E-01 | 0.052 | 0.043 | 1.21 | 0.83 | -1.76 | 3.77E-05 | 0.094 | 0.061 | 1.61 | 1.17 | -2.23 | 1.79 | 7.72E-04 | CSNK2A2(dist=11306), CCDC113(dist=40752)          | intergenic     |
| 2  | 151603893 | G | A | rs140974099             | 4.82E-01 | 0.034 | 0.030 | 1.15 | 0.73 | -1.82 | 8.82E-07 | 0.050 | 0.020 | 2.52 | 1.61 | -3.95 | 2.16 | 7.75E-04 | LOC101929282(dist=112022), RBM43(dist=500835)     | intergenic     |
| 7  | 143171402 | T | C | rs4726625               | 5.51E-05 | 0.064 | 0.115 | 0.52 | 0.38 | -0.72 | 7.70E-01 | 0.091 | 0.095 | 0.95 | 0.69 | -1.32 | 0.70 | 7.76E-04 | EPHA1-AS1                                         | ncRNA_intronic |
| 18 | 52363438  | G | A | rs80027589              | 2.38E-01 | 0.082 | 0.075 | 1.11 | 0.82 | -1.49 | 4.03E-05 | 0.102 | 0.060 | 1.76 | 1.28 | -2.41 | 1.57 | 7.76E-04 | DYNAP(dist=96714), RAB27B(dist=132270)            | intergenic     |
| 10 | 43946973  | T | C | rs2999288               | 2.75E-05 | 0.126 | 0.076 | 0.57 | 0.44 | -0.74 | 6.24E-01 | 0.099 | 0.092 | 0.93 | 0.68 | -1.27 | 0.68 | 7.77E-04 | ZNF487                                            | ncRNA_intronic |
| 12 | 27767695  | G | A | rs115524442             | 2.90E-01 | 0.073 | 0.065 | 1.14 | 0.83 | -1.57 | 1.80E-05 | 0.097 | 0.054 | 1.89 | 1.36 | -2.61 | 1.66 | 7.77E-04 | PPFIBP1                                           | intronic       |
| 14 | 37462847  | C | T | rs911008                | 4.83E-05 | 0.298 | 0.214 | 0.64 | 0.53 | -0.77 | 5.57E-01 | 0.259 | 0.268 | 1.05 | 0.85 | -1.3  | 0.77 | 7.80E-04 | SLC25A21                                          | intronic       |
| 6  | 32341353  | G | A | rs9268402               | 5.73E-05 | 0.322 | 0.398 | 0.72 | 0.6  | -0.85 | 4.58E-01 | 0.369 | 0.389 | 0.92 | 0.76 | -1.12 | 0.79 | 7.80E-04 | C6orf10(dist=1664), HCG23(dist=16934)             | intergenic     |
| 10 | 108270269 | T | C | rs1417950               | 4.07E-05 | 0.437 | 0.361 | 0.73 | 0.62 | -0.86 | 6.56E-01 | 0.401 | 0.393 | 0.97 | 0.8  | -1.17 | 0.79 | 7.83E-04 | LOC101927549(dist=690178), SORCS1(dist=63152)     | intergenic     |
| 13 | 65232024  | A | G | rs359357                | 3.47E-01 | 0.388 | 0.405 | 1.07 | 0.91 | -1.27 | 2.15E-05 | 0.333 | 0.429 | 1.51 | 1.24 | -1.83 | 1.25 | 7.84E-04 | LOC102723968(dist=813766), MIR548X2(dist=1308438) | intergenic     |
| 10 | 43947790  | C | G | rs2265955               | 2.79E-05 | 0.126 | 0.076 | 0.57 | 0.44 | -0.74 | 6.25E-01 | 0.099 | 0.092 | 0.93 | 0.68 | -1.27 | 0.68 | 7.85E-04 | ZNF487                                            | ncRNA_intronic |
| 10 | 43943940  | T | C | rs386743188;rs2819025   | 2.82E-05 | 0.125 | 0.076 | 0.57 | 0.44 | -0.74 | 6.23E-01 | 0.099 | 0.092 | 0.93 | 0.68 | -1.27 | 0.68 | 7.85E-04 | ZNF487                                            | ncRNA_intronic |
| 10 | 43943762  | G | A | rs2261637               | 2.80E-05 | 0.126 | 0.076 | 0.57 | 0.44 | -0.74 | 6.25E-01 | 0.099 | 0.092 | 0.93 | 0.68 | -1.27 | 0.68 | 7.87E-04 | ZNF487                                            | ncRNA_intronic |
| 12 | 45851280  | A | C | rs71437724;rs12366900   | 3.76E-05 | 0.469 | 0.384 | 1.42 | 1.2  | -1.67 | 8.18E-01 | 0.371 | 0.377 | 0.97 | 0.8  | -1.18 | 1.26 | 7.88E-04 | ANO6(dist=17093), LINC00938(dist=268223)          | intergenic     |
| 12 | 118091757 | C | G | rs2090440               | 4.64E-01 | 0.281 | 0.275 | 0.97 | 0.81 | -1.16 | 1.27E-05 | 0.341 | 0.250 | 0.64 | 0.53 | -0.78 | 0.77 | 7.90E-04 | KSR2                                              | intronic       |
| 6  | 109671391 | C | G | rs9480933               | 3.21E-01 | 0.357 | 0.329 | 0.88 | 0.74 | -1.05 | 3.34E-05 | 0.437 | 0.359 | 0.72 | 0.6  | -0.87 | 0.79 | 7.90E-04 | CCDC162P(dist=41968), CD164(dist=16326)           | intergenic     |
| 20 | 8158417   | G | A | rs6055593               | 9.64E-01 | 0.497 | 0.487 | 0.96 | 0.81 | -1.13 | 2.52E-07 | 0.582 | 0.460 | 1.63 | 1.35 | -1.97 | 1.25 | 7.91E-04 | PLCB1                                             | intronic       |
| 5  | 100793610 | C | G | rs462947                | 4.25E-05 | 0.306 | 0.220 | 1.56 | 1.3  | -1.87 | 5.99E-01 | 0.260 | 0.263 | 0.98 | 0.79 | -1.21 | 1.30 | 7.92E-04 | ST8SIA4(dist=554621), SLC04C1(dist=776082)        | intergenic     |
| 11 | 117487571 | C | T | rs78449855              | 4.33E-01 | 0.054 | 0.050 | 1.10 | 0.76 | -1.58 | 3.02E-06 | 0.080 | 0.042 | 1.95 | 1.37 | -2.78 | 1.76 | 7.98E-04 | DSCAML1                                           | intronic       |
| 11 | 75987700  | T | C | rs115599108             | 1.78E-01 | 0.037 | 0.030 | 1.25 | 0.81 | -1.95 | 3.60E-05 | 0.045 | 0.021 | 2.18 | 1.36 | -3.47 | 2.15 | 7.99E-04 | WNT11(dist=70126), PRKRIR(dist=73301)             | intergenic     |
| 17 | 65259706  | G | T | rs73333996              | 5.82E-01 | 0.023 | 0.021 | 1.09 | 0.63 | -1.89 | 1.50E-05 | 0.053 | 0.023 | 2.37 | 1.54 | -3.66 | 2.26 | 8.00E-04 | HELZ(dist=18387), PSMD12(dist=76913)              | intergenic     |
| 6  | 32682965  | C | T | rs3997855               | 4.42E-05 | 0.505 | 0.437 | 1.31 | 1.12 | -1.55 | 5.68E-01 | 0.431 | 0.408 | 1.10 | 0.91 | -1.33 | 1.28 | 8.01E-04 | HLA-DQB1(dist=48499), HLA-DQA2(dist=26198)        | intergenic     |
| 17 | 65259171  | T | G | rs185950844             | 6.46E-01 | 0.022 | 0.021 | 1.07 | 0.61 | -1.87 | 7.71E-06 | 0.052 | 0.022 | 2.46 | 1.59 | -3.82 | 2.27 | 8.06E-04 | HELZ(dist=17852), PSMD12(dist=77448)              | intergenic     |
| 17 | 65259135  | A | G | rs73303361              | 5.83E-01 | 0.023 | 0.021 | 1.09 | 0.63 | -1.89 | 1.50E-05 | 0.053 | 0.023 | 2.37 | 1.54 | -3.66 | 2.26 | 8.07E-04 | HELZ(dist=17816), PSMD12(dist=77484)              | intergenic     |
| 10 | 50436863  | T | A | rs10857448              | 2.24E-05 | 0.163 | 0.098 | 1.80 | 1.43 | -2.26 | 6.09E-01 | 0.168 | 0.167 | 1.00 | 0.78 | -1.29 | 1.43 | 8.08E-04 | C10orf128(dist=40418), C10orf71-AS1(dist=67465)   | intergenic     |
| 17 | 65259273  | T | C | rs111876177             | 5.84E-01 | 0.023 | 0.021 | 1.09 | 0.63 | -1.89 | 1.50E-05 | 0.053 | 0.023 | 2.37 | 1.54 | -3.66 | 2.26 | 8.08E-04 | HELZ(dist=17954), PSMD12(dist=77346)              | intergenic     |
| 10 | 12895278  | C | A | rs145465561             | 5.40E-05 | 0.062 | 0.035 | 1.84 | 1.28 | -2.64 | 6.18E-01 | 0.036 | 0.032 | 1.16 | 0.7  | -1.91 | 1.96 | 8.09E-04 | CAMK1D(dist=17733), CCDC3(dist=43347)             | intergenic     |
| 5  | 100724391 | A | G | rs369776                | 3.98E-05 | 0.281 | 0.362 | 0.69 | 0.57 | -0.82 | 5.80E-01 | 0.355 | 0.358 | 0.99 | 0.81 | -1.2  | 0.80 | 8.11E-04 | ST8SIA4(dist=485402), SLC04C1(dist=845301)        | intergenic     |
| 12 | 116356999 | T | C | rs7970731               | 4.96E-01 | 0.246 | 0.225 | 0.89 | 0.74 | -1.08 | 1.59E-05 | 0.348 | 0.274 | 0.71 | 0.58 | -0.86 | 0.78 | 8.16E-04 | TBX3(dist=1235030), MED13L(dist=39382)            | intergenic     |
| 21 | 36471174  | A | G | rs186789735;rs386818200 | 3.84E-01 | 0.045 | 0.041 | 1.12 | 0.75 | -1.66 | 9.27E-07 | 0.062 | 0.033 | 1.95 | 1.31 | -2.9  | 2.02 | 8.17E-04 | RUNX1(dist=49579), LOC100506403(dist=273631)      | intergenic     |
| 5  | 122249257 | G | A | rs185550592             | 2.06E-05 | 0.168 | 0.116 | 1.54 | 1.23 | -1.93 | 6.96E-01 | 0.130 | 0.122 | 1.07 | 0.81 | -1.41 |      |          |                                                   |                |

|    |           |   |   |             |          |       |       |      |      |       |          |       |       |      |      |       |      |          |                                               |                |
|----|-----------|---|---|-------------|----------|-------|-------|------|------|-------|----------|-------|-------|------|------|-------|------|----------|-----------------------------------------------|----------------|
| 6  | 32472733  | G | A | rs77460382  | 4.78E-05 | 0.358 | 0.421 | 0.77 | 0.65 | -0.91 | 4.99E-01 | 0.392 | 0.411 | 0.93 | 0.76 | -1.12 | 0.76 | 8.47E-04 | HLA-DRA(dist=59907), HLA-DRB5(dist=12421)     | intergenic     |
| 1  | 183208629 | T | A | rs78793848  | 5.51E-05 | 0.043 | 0.020 | 2.14 | 1.38 | -3.33 | 5.94E-01 | 0.030 | 0.025 | 1.19 | 0.68 | -2.07 | 2.18 | 8.47E-04 | LAMC2                                         | exonic         |
| 2  | 151603449 | C | T | rs115381797 | 5.05E-01 | 0.034 | 0.030 | 1.14 | 0.73 | -1.81 | 8.90E-07 | 0.050 | 0.020 | 2.51 | 1.6  | -3.94 | 2.15 | 8.48E-04 | LOC101929282(dist=111578), RBM43(dist=501279) | intergenic     |
| 14 | 34263755  | C | T | rs7148934   | 4.90E-05 | 0.391 | 0.320 | 0.73 | 0.62 | -0.86 | 5.49E-01 | 0.352 | 0.347 | 0.98 | 0.8  | -1.19 | 0.76 | 8.50E-04 | NPAS3                                         | intronic       |
| 12 | 27766350  | T | C | rs16932236  | 2.96E-01 | 0.074 | 0.065 | 1.14 | 0.83 | -1.57 | 2.06E-05 | 0.097 | 0.054 | 1.89 | 1.36 | -2.61 | 1.65 | 8.51E-04 | PPFIBP1                                       | intronic       |
| 5  | 100750853 | G | A | rs73780725  | 5.76E-05 | 0.139 | 0.208 | 0.61 | 0.49 | -0.77 | 5.28E-01 | 0.177 | 0.182 | 0.96 | 0.76 | -1.23 | 0.75 | 8.62E-04 | ST8SIA4(dist=511864), SLCO4C1(dist=818839)    | intergenic     |
| 11 | 117446304 | G | C | rs115651152 | 6.85E-01 | 0.059 | 0.057 | 1.03 | 0.73 | -1.45 | 1.27E-06 | 0.091 | 0.045 | 2.12 | 1.51 | -2.96 | 1.66 | 8.63E-04 | DSCAML1                                       | intronic       |
| 8  | 14078102  | A | G | rs2054429   | 5.30E-05 | 0.237 | 0.170 | 0.66 | 0.54 | -0.8  | 8.43E-01 | 0.184 | 0.187 | 1.02 | 0.8  | -1.3  | 0.76 | 8.63E-04 | SGCZ                                          | intronic       |
| 7  | 54494400  | T | C | rs73397737  | 3.14E-01 | 0.037 | 0.031 | 1.20 | 0.77 | -1.85 | 1.97E-05 | 0.057 | 0.024 | 2.43 | 1.6  | -3.7  | 1.92 | 8.66E-04 | LINC01445(dist=76862), VSTM2A(dist=115618)    | intergenic     |
| 11 | 117477724 | G | A | rs77949322  | 5.26E-01 | 0.053 | 0.050 | 1.07 | 0.75 | -1.55 | 1.49E-06 | 0.083 | 0.043 | 2.01 | 1.42 | -2.85 | 1.73 | 8.66E-04 | DSCAML1                                       | intronic       |
| 10 | 43954208  | C | G | rs2999290   | 2.92E-05 | 0.125 | 0.076 | 0.57 | 0.44 | -0.74 | 6.47E-01 | 0.098 | 0.092 | 0.93 | 0.68 | -1.27 | 0.68 | 8.71E-04 | ZNF487                                        | ncRNA_intronic |
| 1  | 174985557 | G | C | rs12125682  | 5.09E-01 | 0.052 | 0.039 | 1.35 | 0.93 | -1.97 | 2.15E-05 | 0.096 | 0.056 | 1.79 | 1.29 | -2.47 | 1.65 | 8.74E-04 | MRPS14                                        | intronic       |
| 10 | 74068696  | C | T | rs4300326   | 7.04E-01 | 0.251 | 0.230 | 0.89 | 0.74 | -1.08 | 2.37E-06 | 0.347 | 0.264 | 0.67 | 0.55 | -0.82 | 0.77 | 8.76E-04 | DDIT4(dist=32899), DNAJB12(dist=23892)        | intergenic     |
| 1  | 4858391   | A | G | rs72639948  | 5.74E-05 | 0.094 | 0.050 | 1.96 | 1.46 | -2.65 | 5.42E-01 | 0.095 | 0.098 | 0.96 | 0.7  | -1.33 | 1.60 | 8.78E-04 | AJAP1(dist=14540), MIR4417(dist=765740)       | intergenic     |
| 1  | 158694563 | G | A | rs703144    | 2.89E-05 | 0.155 | 0.092 | 1.81 | 1.42 | -2.29 | 6.76E-01 | 0.125 | 0.126 | 0.99 | 0.75 | -1.32 | 1.41 | 8.81E-04 | OR6K3(dist=6658), OR6K6(dist=30043)           | intronic       |
| 12 | 11865274  | A | T | rs77245049  | 4.73E-05 | 0.114 | 0.073 | 1.64 | 1.25 | -2.14 | 7.60E-01 | 0.083 | 0.076 | 1.10 | 0.78 | -1.54 | 1.51 | 8.83E-04 | ETV6                                          | intronic       |
| 2  | 234518422 | T | C | rs17864668  | 4.26E-01 | 0.187 | 0.173 | 1.10 | 0.89 | -1.36 | 2.83E-05 | 0.248 | 0.171 | 1.60 | 1.28 | -1.99 | 1.33 | 8.83E-04 | USP40(dist=44186), UGT1A8(dist=7869)          | intergenic     |
| 7  | 82847756  | T | G | rs11761162  | 3.92E-01 | 0.224 | 0.208 | 1.10 | 0.91 | -1.34 | 2.40E-05 | 0.312 | 0.236 | 1.47 | 1.2  | -1.8  | 1.31 | 8.84E-04 | PCLLO(dist=55559), SEMA3E(dist=145466)        | intergenic     |
| 10 | 44005274  | C | A | rs2999228   | 3.74E-05 | 0.127 | 0.078 | 0.58 | 0.45 | -0.75 | 6.25E-01 | 0.098 | 0.091 | 0.92 | 0.67 | -1.27 | 0.68 | 8.86E-04 | ZNF487(dist=27267), ZNF239(dist=46519)        | intergenic     |
| 1  | 152942190 | G | A | rs1890284   | 3.81E-05 | 0.277 | 0.201 | 0.65 | 0.54 | -0.79 | 6.55E-01 | 0.232 | 0.230 | 0.99 | 0.79 | -1.24 | 0.77 | 8.89E-04 | SPRR4                                         | upstream       |
| 1  | 174986625 | T | C | rs12124150  | 5.13E-01 | 0.052 | 0.039 | 1.35 | 0.93 | -1.96 | 2.12E-05 | 0.097 | 0.057 | 1.78 | 1.29 | -2.46 | 1.65 | 8.90E-04 | MRPS14                                        | intronic       |
| 9  | 5470242   | G | T | rs10217310  | 2.98E-01 | 0.123 | 0.114 | 1.09 | 0.85 | -1.39 | 4.02E-05 | 0.157 | 0.098 | 1.71 | 1.32 | -2.22 | 1.46 | 8.90E-04 | CD274                                         | UTR3           |
| 10 | 43989430  | T | G | rs3006410   | 2.95E-05 | 0.125 | 0.076 | 0.58 | 0.44 | -0.75 | 6.61E-01 | 0.095 | 0.089 | 0.93 | 0.68 | -1.28 | 0.68 | 8.93E-04 | ZNF487(dist=11423), ZNF239(dist=62363)        | intronic       |
| 10 | 43965492  | C | T | rs4948727   | 2.94E-05 | 0.126 | 0.076 | 0.57 | 0.44 | -0.74 | 6.54E-01 | 0.098 | 0.091 | 0.93 | 0.68 | -1.28 | 0.69 | 8.93E-04 | ZNF487                                        | ncRNA_intronic |
| 8  | 17491467  | G | A | rs35456129  | 4.63E-01 | 0.252 | 0.247 | 1.03 | 0.85 | -1.24 | 4.87E-06 | 0.305 | 0.219 | 1.56 | 1.28 | -1.92 | 1.31 | 8.94E-04 | PDGFRL                                        | intronic       |
| 13 | 115018911 | C | T | rs149182518 | 1.72E-05 | 0.074 | 0.041 | 1.86 | 1.34 | -2.6  | 8.00E-01 | 0.030 | 0.030 | 0.98 | 0.56 | -1.69 | 1.80 | 8.97E-04 | CDC16                                         | intronic       |
| 20 | 8193066   | C | T | rs6039096   | 4.31E-01 | 0.099 | 0.092 | 1.08 | 0.82 | -1.42 | 4.31E-05 | 0.137 | 0.079 | 1.84 | 1.39 | -2.43 | 1.46 | 9.04E-04 | PLCB1                                         | intronic       |
| 5  | 2881741   | C | T | rs116673931 | 3.17E-01 | 0.029 | 0.023 | 1.23 | 0.75 | -2.03 | 3.25E-06 | 0.048 | 0.024 | 2.04 | 1.3  | -3.2  | 2.28 | 9.05E-04 | C5orf38(dist=126230), LINC01377(dist=296208)  | intergenic     |
| 1  | 202632992 | C | T | rs111733518 | 2.47E-01 | 0.055 | 0.047 | 1.16 | 0.81 | -1.67 | 2.52E-05 | 0.071 | 0.036 | 2.01 | 1.38 | -2.93 | 1.74 | 9.09E-04 | SYT2                                          | intronic       |
| 1  | 202635989 | G | A | rs112221889 | 2.21E-01 | 0.053 | 0.046 | 1.17 | 0.81 | -1.7  | 2.34E-05 | 0.065 | 0.033 | 2.04 | 1.38 | -3.02 | 1.77 | 9.19E-04 | SYT2                                          | intronic       |
| 12 | 59955778  | A | G | rs7304123   | 3.12E-05 | 0.150 | 0.099 | 1.60 | 1.26 | -2.03 | 8.56E-01 | 0.110 | 0.108 | 1.02 | 0.76 | -1.37 | 1.42 | 9.19E-04 | LRIG3(dist=641459), SLC16A7(dist=34043)       | intergenic     |
| 1  | 202636276 | T | C | rs112347071 | 2.20E-01 | 0.053 | 0.046 | 1.17 | 0.81 | -1.7  | 2.33E-05 | 0.065 | 0.033 | 2.04 | 1.38 | -3.02 | 1.78 | 9.20E-04 | SYT2                                          | intronic       |
| 1  | 202635939 | G | A | rs113205378 | 2.21E-01 | 0.053 | 0.046 | 1.17 | 0.81 | -1.7  | 2.35E-05 | 0.065 | 0.033 | 2.04 | 1.38 | -3.02 | 1.77 | 9.20E-04 | SYT2                                          | intronic       |
| 10 | 62383203  | G | C | rs73271546  | 4.09E-05 | 0.027 | 0.061 | 0.43 | 0.26 | -0.69 | 8.92E-01 | 0.053 | 0.053 | 1.00 | 0.66 | -1.52 | 0.57 | 9.22E-04 | ANK3                                          | intronic       |
| 7  | 54493044  | G | A | rs79645177  | 2.82E-01 | 0.041 | 0.034 | 1.22 | 0.8  | -1.85 | 1.97E-05 | 0.057 | 0.024 | 2.44 | 1.6  | -3.71 | 1.87 | 9.26E-04 | LINC01445(dist=75506), VSTM2A(dist=116974)    | intergenic     |
| 7  | 54493037  | A | G | rs112744506 | 2.82E-01 | 0.041 | 0.034 | 1.22 | 0.8  | -1.85 | 1.97E-05 | 0.057 | 0.024 | 2.44 | 1.6  | -3.71 | 1.87 | 9.26E-04 | LINC01445(dist=75499), VSTM2A(dist=116981)    | intergenic     |
| 7  | 54493070  | G | A | rs79868956  | 2.82E-01 | 0.041 | 0.034 | 1.22 | 0.8  | -1.85 | 1.96E-05 | 0.057 | 0.024 | 2.44 | 1.6  | -3.71 | 1.87 | 9.26E-04 | LINC01445(dist=75532), VSTM2A(dist=116948)    | intergenic     |
| 20 | 8218877   | G | A | rs6039105   | 3.82E-01 | 0.072 | 0.066 | 1.10 | 0.8  | -1.51 | 1.80E-05 | 0.094 | 0.054 | 1.84 | 1.32 | -2.55 | 1.68 | 9.26E-04 | PLCB1                                         | intronic       |
| 7  | 54493111  | G | T | rs73397732  | 2.82E-01 | 0.041 | 0.034 | 1.22 | 0.8  | -1.85 | 1.96E-05 | 0.057 | 0.024 | 2.44 | 1.6  | -3.71 | 1.86 | 9.27E-04 | LINC01445(dist=75573), VSTM2A(dist=116907)    | intergenic     |
| 7  | 54493123  | C | T | rs113051535 | 2.82E-01 | 0.041 | 0.034 | 1.22 | 0.8  | -1.85 | 1.96E-05 | 0.057 | 0.024 | 2.44 | 1.6  | -3.71 | 1.86 | 9.27E-04 | LINC01445(dist=75585), VSTM2A(dist=116895)    | intergenic     |
| 17 | 52105491  | G | A | rs114166604 | 3.76E-05 | 0.055 | 0.028 | 2.02 | 1.37 | -2.97 | 9.18E-01 | 0.030 | 0.028 | 1.10 | 0.63 | -1.9  | 1.90 | 9.33E-04 | KIF2B(dist=202918), TOM1L1(dist=872561)       | intergenic     |
| 2  | 77980691  | C | G | rs13398413  | 9.65E-01 | 0.149 | 0.152 | 0.98 | 0.78 | -1.23 | 1.03E-07 | 0.246 | 0.157 | 1.75 | 1.41 | -2.18 | 1.36 | 9.36E-04 | LOC101927967                                  | ncRNA_intronic |
| 7  | 54493531  | C | A | rs112056569 | 2.82E-01 | 0.041 | 0.034 | 1.22 | 0.8  | -1.85 | 1.97E-05 | 0.057 | 0.024 | 2.43 | 1.6  | -3.71 | 1.86 | 9.39E-04 | LINC01445(dist=75993), VSTM2A(dist=116487)    | intergenic     |
| 6  | 32446853  | A | T | rs17203612  | 1.86E-05 | 0.209 | 0.276 | 0.69 | 0.57 | -0.84 | 6.47E-01 | 0.297 | 0.316 | 0.91 | 0.75 | -1.12 | 0.77 | 9.40E-04 | HLA-DRA(dist=34027), HLA-DRB5(dist=38301)     | intergenic     |
| 7  | 54493539  | T | C | rs73397734  | 2.81E-01 | 0.041 | 0.034 | 1.22 | 0.8  | -1.85 | 1.97E-05 | 0.057 | 0.024 | 2.43 | 1.6  | -3.71 | 1.86 | 9.40E-04 | LINC01445(dist=76001), VSTM2A(dist=116479)    | intergenic     |
| 12 | 102080589 | G | A | rs73390509  | 3.51E-01 | 0.155 | 0.148 | 1.05 | 0.84 | -1.32 | 2.55E-05 | 0.184 | 0.125 | 1.59 | 1.24 | -2.03 | 1.42 | 9.44E-04 | MYBPC1                                        | downstream     |
| 14 | 63237581  | C | T | rs8010200   | 3.98E-05 | 0.564 | 0.479 | 1.41 | 1.19 | -1.66 | 7.46E-01 | 0.486 | 0.480 | 1.02 | 0.85 | -1.23 | 1.25 | 9.49E-04 | KCNH5                                         | intronic       |
| 1  | 158678095 | G | A | rs703135    | 4.93E-05 | 0.184 | 0.121 | 1.64 | 1.32 | -2.04 | 5.50E-01 | 0.167 | 0.163 | 1.03 | 0.8  | -1.32 | 1.39 | 9.49E-04 | OR6K2(dist=7653), OR6K3(dist=8863)            | intergenic     |
| 11 | 113850102 | G | A | rs145948134 | 7.34E-06 | 0.045 | 0.020 | 2.31 | 1.5  | -3.57 | 9.69E-01 | 0.027 | 0.025 | 1.08 | 0.6  | -1.92 | 2.04 | 9.50E-04 | HTR3A                                         | intronic       |
| 7  | 54494492  | G | A | rs112481168 | 3.29E-01 | 0.037 | 0.032 | 1.19 | 0.77 | -1.84 | 1.97E-05 | 0.057 | 0.024 | 2.43 | 1.6  | -3.7  | 1.91 | 9.51E-04 | LINC01445(dist=76954), VSTM2A(dist=115526)    | intergenic     |
| 20 | 52845123  | C | T | rs73914309  | 6.98E-01 | 0.068 | 0.062 | 1.10 | 0.8  | -1.53 | 5.66E-06 | 0.119 | 0.073 | 1.72 | 1.28 | -2.3  | 1.62 | 9.56E-04 | PFDN4(dist=8631), DOK5(dist=246888)           | intergenic     |
| 10 | 44004157  | A | G | rs1856400   | 3.40E-05 | 0.126 | 0.077 | 0.58 | 0.45 | -0.75 | 6.61E-01 | 0.097 | 0.091 | 0.93 | 0.68 | -1.28 | 0.69 | 9.57E-04 | ZNF487(dist=26150), ZNF239(dist=47636)        | intergenic     |
| 13 | 24653346  | G | A | rs61945466  | 9.56E-01 | 0.027 | 0.025 | 1.07 | 0.64 | -1.77 | 7.52E-07 | 0.061 | 0.030 | 2.11 | 1.41 | -3.17 | 2.16 | 9.57E-04 | SPATA13                                       | intronic       |
| 14 | 63252368  | A | G | rs8014674   | 4.05E-05 | 0.490 | 0.401 | 1.43 | 1.22 | -1.69 | 8.17E-01 | 0.415 | 0.416 | 1.00 | 0.82 | -1.2  | 1.26 | 9.57E-04 | KCNH5                                         | intronic       |
| 7  | 54494089  | A | T | rs75031833  | 2.81E-01 | 0.041 | 0.034 | 1.22 | 0.8  | -1.85 | 1.97E-05 | 0.057 | 0.024 | 2.43 | 1.6  | -3.71 | 1.86 | 9.59E-04 | LINC01445(dist=76551), VSTM2A(dist=115929)    | intergenic     |
| 7  | 54494060  | A | T | rs112165252 | 2.82E-01 | 0.041 | 0.034 | 1.22 | 0.8  | -1.85 | 1.97E-05 | 0.057 | 0.024 | 2.43 | 1.6  | -3.71 | 1.86 | 9.60E-04 | LINC01445(dist=76522), VSTM2A(dist=115958)    | intergenic     |
| 9  | 117401149 | A | C | rs16930496  | 5.54E-05 | 0.175 | 0.127 | 1.45 | 1.16 | -1.81 | 8.09E-01 | 0.105 | 0.098 | 1.08 | 0.79 | -1.46 | 1.41 | 9.63E-04 | C9orf91                                       | intronic       |
| 20 | 8171572   | A | G | rs6         |          |       |       |      |      |       |          |       |       |      |      |       |      |          |                                               |                |

|    |           |   |   |              |          |       |       |      |      |       |          |       |       |      |      |       |      |          |                                                 |                |
|----|-----------|---|---|--------------|----------|-------|-------|------|------|-------|----------|-------|-------|------|------|-------|------|----------|-------------------------------------------------|----------------|
| 1  | 174962082 | C | T | rs12119351   | 5.39E-01 | 0.052 | 0.039 | 1.33 | 0.91 | -1.94 | 2.30E-05 | 0.096 | 0.056 | 1.80 | 1.3  | -2.49 | 1.64 | 1.00E-03 | RABGAP1L                                        | UTR3           |
| 14 | 105575294 | G | A | rs10144463   | 3.75E-01 | 0.224 | 0.188 | 1.24 | 1.02 | -1.52 | 3.25E-05 | 0.279 | 0.228 | 1.31 | 1.06 | -1.62 | 1.34 | 1.01E-03 | LOC102723354(dist=9461), JAG2(dist=32024)       | intergenic     |
| 3  | 151933378 | C | T | rs16864079   | 4.55E-01 | 0.150 | 0.150 | 1.00 | 0.8  | -1.26 | 2.94E-05 | 0.207 | 0.135 | 1.67 | 1.32 | -2.11 | 1.37 | 1.01E-03 | AADACL2-AS1(dist=287415), MBNL1-AS1(dist=47027) | intergenic     |
| 16 | 76958044  | T | A | rs113319316  | 3.88E-05 | 0.142 | 0.095 | 1.57 | 1.23 | -2    | 8.52E-01 | 0.098 | 0.091 | 1.07 | 0.78 | -1.47 | 1.44 | 1.02E-03 | MIR4719(dist=55128), MON1B(dist=266772)         | intergenic     |
| 9  | 31370837  | C | T | rs112333413  | 1.70E-05 | 0.091 | 0.055 | 1.73 | 1.28 | -2.33 | 9.52E-01 | 0.060 | 0.057 | 1.05 | 0.71 | -1.56 | 1.62 | 1.02E-03 | LINC01242(dist=962385), ACO1(dist=1013764)      | intergenic     |
| 21 | 36576548  | C | T | rs73363469   | 8.22E-01 | 0.038 | 0.038 | 1.00 | 0.66 | -1.53 | 4.13E-07 | 0.069 | 0.030 | 2.43 | 1.65 | -3.57 | 1.82 | 1.02E-03 | RUNX1(dist=154953), LOC100506403(dist=168257)   | intergenic     |
| 12 | 27764076  | G | A | rs1142255039 | 3.07E-01 | 0.074 | 0.065 | 1.14 | 0.83 | -1.56 | 2.65E-05 | 0.096 | 0.054 | 1.88 | 1.36 | -2.6  | 1.63 | 1.02E-03 | PPFIBP1                                         | intronic       |
| 2  | 234534829 | G | A | rs17874938   | 4.46E-01 | 0.187 | 0.174 | 1.10 | 0.89 | -1.35 | 3.25E-05 | 0.247 | 0.170 | 1.60 | 1.29 | -1.99 | 1.32 | 1.02E-03 | UT1A8                                           | intronic       |
| 11 | 117482918 | A | G | rs115346943  | 4.68E-01 | 0.055 | 0.051 | 1.09 | 0.76 | -1.56 | 2.69E-06 | 0.081 | 0.043 | 1.96 | 1.38 | -2.78 | 1.71 | 1.04E-03 | DSCAML1                                         | intronic       |
| 6  | 32652392  | A | T | rs17212413   | 6.24E-06 | 0.078 | 0.047 | 1.74 | 1.26 | -2.4  | 8.99E-01 | 0.039 | 0.038 | 1.02 | 0.63 | -1.66 | 1.93 | 1.04E-03 | HLA-DQB1(dist=17926), HLA-DQA2(dist=56771)      | intergenic     |
| 11 | 117474991 | T | C | rs114566299  | 6.15E-01 | 0.052 | 0.049 | 1.05 | 0.73 | -1.52 | 9.49E-07 | 0.083 | 0.043 | 2.05 | 1.44 | -2.9  | 1.71 | 1.04E-03 | DSCAML1                                         | intronic       |
| 12 | 131021017 | T | C | rs80071870   | 4.46E-01 | 0.029 | 0.026 | 1.11 | 0.68 | -1.81 | 3.09E-05 | 0.055 | 0.024 | 2.39 | 1.56 | -3.67 | 1.97 | 1.05E-03 | RIMBP2(dist=18607), STX2(dist=253128)           | intergenic     |
| 13 | 115008989 | T | C | rs189327296  | 3.51E-05 | 0.067 | 0.035 | 1.95 | 1.37 | -2.77 | 9.42E-01 | 0.035 | 0.034 | 1.03 | 0.62 | -1.72 | 1.79 | 1.05E-03 | CDC16                                           | intronic       |
| 7  | 54494548  | C | T | rs73397741   | 2.95E-01 | 0.041 | 0.034 | 1.21 | 0.8  | -1.84 | 1.99E-05 | 0.057 | 0.024 | 2.43 | 1.6  | -3.7  | 1.85 | 1.06E-03 | LINC01445(dist=77010), VSTM2A(dist=115470)      | intergenic     |
| 10 | 97329911  | T | C | rs11188367   | 8.72E-06 | 0.251 | 0.185 | 1.48 | 1.22 | -1.79 | 9.52E-01 | 0.191 | 0.189 | 1.01 | 0.8  | -1.28 | 1.32 | 1.06E-03 | SORBS1(dist=8734), ALDH18A1(dist=35775)         | intergenic     |
| 17 | 65258365  | C | T | rs60499039   | 6.33E-01 | 0.024 | 0.022 | 1.08 | 0.63 | -1.85 | 1.56E-05 | 0.053 | 0.024 | 2.34 | 1.52 | -3.61 | 2.21 | 1.06E-03 | HELZ(dist=17046), PSMD12(dist=78254)            | intergenic     |
| 9  | 76698054  | G | T | rs79509341   | 2.68E-05 | 0.091 | 0.050 | 1.91 | 1.41 | -2.59 | 6.78E-01 | 0.098 | 0.095 | 1.03 | 0.75 | -1.41 | 1.59 | 1.07E-03 | MIR6130                                         | ncRNA_intronic |
| 12 | 59961924  | A | G | rs115543794  | 3.12E-01 | 0.061 | 0.054 | 1.14 | 0.81 | -1.61 | 6.38E-05 | 0.083 | 0.043 | 2.00 | 1.41 | -2.84 | 1.66 | 1.08E-03 | LRI3G3(dist=647605), SLC16A7(dist=27897)        | intergenic     |
| 11 | 88082778  | A | G | rs7116555    | 2.43E-05 | 0.203 | 0.152 | 1.42 | 1.15 | -1.74 | 8.28E-01 | 0.175 | 0.162 | 1.10 | 0.86 | -1.4  | 1.35 | 1.08E-03 | CTSC(dist=11837), GRM5(dist=154966)             | intergenic     |
| 7  | 24924885  | T | A | rs182394392  | 5.00E-05 | 0.065 | 0.038 | 1.76 | 1.24 | -2.51 | 8.54E-01 | 0.028 | 0.028 | 1.00 | 0.56 | -1.76 | 1.88 | 1.08E-03 | OSBPL3                                          | intronic       |
| 7  | 54494634  | A | G | rs79249195   | 3.01E-01 | 0.041 | 0.034 | 1.21 | 0.79 | -1.84 | 1.98E-05 | 0.057 | 0.024 | 2.43 | 1.6  | -3.7  | 1.85 | 1.09E-03 | LINC01445(dist=77096), VSTM2A(dist=115384)      | intergenic     |
| 14 | 99840319  | T | G | rs2614480    | 1.88E-05 | 0.107 | 0.166 | 1.66 | 1.29 | -2.15 | 9.95E-01 | 0.158 | 0.158 | 1.00 | 0.78 | -1.29 | 1.36 | 1.09E-03 | BCL11B(dist=102269), SETD3(dist=23764)          | intergenic     |
| 7  | 54494635  | A | G | rs74953910   | 3.01E-01 | 0.041 | 0.034 | 1.21 | 0.79 | -1.84 | 1.98E-05 | 0.057 | 0.024 | 2.43 | 1.6  | -3.7  | 1.85 | 1.09E-03 | LINC01445(dist=77097), VSTM2A(dist=115383)      | intergenic     |
| 11 | 17417337  | C | T | rs8192691    | 7.01E-01 | 0.024 | 0.025 | 0.99 | 0.58 | -1.67 | 8.47E-09 | 0.065 | 0.033 | 2.07 | 1.4  | -3.06 | 2.11 | 1.10E-03 | ABCC8                                           | intronic       |
| 1  | 158700972 | A | C | rs703148     | 3.31E-05 | 0.155 | 0.093 | 1.79 | 1.41 | -2.27 | 7.35E-01 | 0.128 | 0.129 | 0.98 | 0.74 | -1.3  | 1.41 | 1.10E-03 | OR6K3(dist=13067), OR6K6(dist=23634)            | intergenic     |
| 11 | 134427653 | C | T | rs115425164  | 3.24E-06 | 0.046 | 0.025 | 1.93 | 1.27 | -2.92 | 7.03E-01 | 0.020 | 0.022 | 0.94 | 0.49 | -1.82 | 2.35 | 1.10E-03 | LOC283177(dist=52098), NONE(dist=NONE)          | intergenic     |
| 1  | 152180128 | A | A | rs12567463   | 3.87E-05 | 0.185 | 0.127 | 1.56 | 1.26 | -1.94 | 8.17E-01 | 0.138 | 0.134 | 1.04 | 0.79 | -1.36 | 1.37 | 1.12E-03 | RPTN(dist=48424), HRNR(dist=4424)               | intergenic     |
| 3  | 72642110  | G | C | rs78134946   | 5.44E-05 | 0.113 | 0.077 | 1.51 | 1.16 | -1.98 | 8.07E-01 | 0.073 | 0.069 | 1.06 | 0.74 | -1.52 | 1.61 | 1.13E-03 | RYBP(dist=146336), SHQ1(dist=156318)            | intergenic     |
| 2  | 45132451  | C | T | rs6722424    | 3.00E-01 | 0.104 | 0.097 | 1.08 | 0.82 | -1.41 | 1.47E-05 | 0.126 | 0.076 | 1.76 | 1.32 | -2.35 | 1.48 | 1.13E-03 | CAMKMT(dist=132720), SIX3-AS1(dist=34842)       | intergenic     |
| 10 | 74073037  | A | G | rs7081608    | 6.23E-01 | 0.268 | 0.244 | 0.88 | 0.73 | -1.06 | 7.06E-06 | 0.358 | 0.278 | 0.69 | 0.57 | -0.84 | 0.77 | 1.14E-03 | DDIT4(dist=37240), DNAJB12(dist=19551)          | intergenic     |
| 12 | 131025364 | G | A | rs74995814   | 4.46E-01 | 0.029 | 0.027 | 1.11 | 0.69 | -1.81 | 3.65E-05 | 0.055 | 0.024 | 2.40 | 1.56 | -3.68 | 1.94 | 1.15E-03 | RIMBP2(dist=22954), STX2(dist=248781)           | intergenic     |
| 13 | 115008682 | C | T | rs147821670  | 2.93E-05 | 0.066 | 0.035 | 1.98 | 1.39 | -2.82 | 8.48E-01 | 0.029 | 0.029 | 0.99 | 0.57 | -1.73 | 1.79 | 1.15E-03 | CDC16                                           | intronic       |
| 13 | 115008876 | A | T | rs142443820  | 2.94E-05 | 0.066 | 0.035 | 1.98 | 1.39 | -2.82 | 8.48E-01 | 0.029 | 0.029 | 0.99 | 0.57 | -1.73 | 1.79 | 1.15E-03 | CDC16                                           | intronic       |
| 2  | 77980913  | C | T | rs13398656   | 9.43E-01 | 0.151 | 0.154 | 0.97 | 0.78 | -1.22 | 1.45E-07 | 0.246 | 0.158 | 1.74 | 1.4  | -2.17 | 1.35 | 1.15E-03 | LOC101927967                                    | ncRNA_intronic |
| 13 | 115009061 | T | C | rs146467788  | 2.95E-05 | 0.066 | 0.035 | 1.98 | 1.39 | -2.82 | 8.48E-01 | 0.029 | 0.029 | 0.99 | 0.57 | -1.73 | 1.79 | 1.15E-03 | CDC16                                           | intronic       |
| 17 | 65256880  | G | A | rs112287131  | 7.01E-01 | 0.023 | 0.022 | 1.06 | 0.62 | -1.82 | 7.93E-06 | 0.053 | 0.022 | 2.43 | 1.57 | -3.76 | 2.18 | 1.16E-03 | HELZ(dist=15561), PSMD12(dist=79739)            | intergenic     |
| 3  | 161844891 | T | C | rs9881606    | 4.52E-05 | 0.040 | 0.085 | 0.45 | 0.3  | -0.67 | 9.85E-01 | 0.059 | 0.056 | 1.06 | 0.71 | -1.58 | 0.66 | 1.16E-03 | OTOL1(dist=623161), LINC01192(dist=1050140)     | intergenic     |
| 13 | 115009586 | A | T | rs143058360  | 2.99E-05 | 0.066 | 0.035 | 1.98 | 1.39 | -2.82 | 8.48E-01 | 0.029 | 0.029 | 0.99 | 0.57 | -1.73 | 1.79 | 1.16E-03 | CDC16                                           | intronic       |
| 13 | 115013752 | G | A | rs138970550  | 2.77E-05 | 0.067 | 0.036 | 1.96 | 1.38 | -2.78 | 8.32E-01 | 0.029 | 0.029 | 0.98 | 0.56 | -1.72 | 1.79 | 1.17E-03 | CDC16                                           | intronic       |
| 1  | 158697754 | C | T | rs857925     | 3.30E-05 | 0.155 | 0.093 | 1.80 | 1.42 | -2.28 | 7.59E-01 | 0.125 | 0.127 | 0.98 | 0.74 | -1.3  | 1.40 | 1.17E-03 | OR6K3(dist=9849), OR6K6(dist=26852)             | intergenic     |
| 11 | 86481942  | C | T | rs112141577  | 3.75E-01 | 0.188 | 0.181 | 1.05 | 0.85 | -1.29 | 5.86E-05 | 0.221 | 0.169 | 1.39 | 1.11 | -1.75 | 1.48 | 1.17E-03 | ME3(dist=98264), PRSS23(dist=20159)             | intergenic     |
| 1  | 158698362 | A | G | rs703146     | 3.30E-05 | 0.155 | 0.093 | 1.80 | 1.42 | -2.28 | 7.59E-01 | 0.125 | 0.127 | 0.98 | 0.74 | -1.3  | 1.40 | 1.17E-03 | OR6K3(dist=10457), OR6K6(dist=26244)            | intergenic     |
| 13 | 115010026 | G | A | rs141659366  | 3.02E-05 | 0.066 | 0.035 | 1.98 | 1.39 | -2.82 | 8.48E-01 | 0.029 | 0.029 | 0.99 | 0.57 | -1.73 | 1.79 | 1.17E-03 | MIR548AR                                        | ncRNA_exonic   |
| 13 | 115010104 | T | C | rs144476102  | 3.03E-05 | 0.066 | 0.035 | 1.98 | 1.39 | -2.82 | 8.48E-01 | 0.029 | 0.029 | 0.99 | 0.57 | -1.73 | 1.79 | 1.17E-03 | CDC16                                           | intronic       |
| 2  | 44565194  | C | T | rs4953090    | 3.83E-01 | 0.283 | 0.262 | 0.90 | 0.75 | -1.08 | 4.06E-05 | 0.328 | 0.249 | 0.68 | 0.56 | -0.83 | 0.79 | 1.18E-03 | PREPL                                           | intronic       |
| 4  | 118445473 | G | A | rs17866013   | 5.20E-05 | 0.049 | 0.023 | 2.24 | 1.48 | -3.39 | 9.52E-01 | 0.021 | 0.020 | 1.05 | 0.55 | -2    | 2.00 | 1.19E-03 | LINC01378                                       | ncRNA_intronic |
| 10 | 42666096  | A | G | rs7084952    | 5.20E-05 | 0.161 | 0.108 | 0.63 | 0.5  | -0.79 | 5.89E-01 | 0.162 | 0.157 | 0.96 | 0.75 | -1.24 | 0.69 | 1.19E-03 | NONE(dist=NONE), LOC441666(dist=161218)         | intergenic     |
| 2  | 44565447  | A | T | rs2289463    | 3.85E-01 | 0.283 | 0.262 | 0.90 | 0.75 | -1.08 | 4.09E-05 | 0.328 | 0.249 | 0.68 | 0.56 | -0.83 | 0.79 | 1.19E-03 | PREPL                                           | intronic       |
| 6  | 165710356 | G | A | rs78324933   | 2.35E-01 | 0.067 | 0.055 | 1.21 | 0.87 | -1.69 | 4.91E-05 | 0.083 | 0.044 | 1.94 | 1.37 | -2.75 | 1.68 | 1.19E-03 | C6orf118                                        | intronic       |
| 11 | 117455690 | T | C | rs75377388   | 7.88E-01 | 0.056 | 0.056 | 1.00 | 0.7  | -1.43 | 6.95E-07 | 0.089 | 0.043 | 2.17 | 1.54 | -3.04 | 1.64 | 1.20E-03 | DSCAML1                                         | intronic       |
| 1  | 158700732 | C | T | rs703147     | 3.38E-05 | 0.155 | 0.092 | 1.80 | 1.42 | -2.27 | 7.59E-01 | 0.126 | 0.128 | 0.98 | 0.74 | -1.3  | 1.40 | 1.20E-03 | OR6K3(dist=12827), OR6K6(dist=23874)            | intergenic     |
| 13 | 115025948 | G | A | rs149676584  | 3.18E-05 | 0.066 | 0.035 | 1.98 | 1.39 | -2.81 | 8.48E-01 | 0.029 | 0.029 | 0.99 | 0.57 | -1.73 | 1.78 | 1.20E-03 | CDC16                                           | intronic       |
| 13 | 115014013 | G | T | rs186072903  | 3.20E-05 | 0.066 | 0.035 | 1.98 | 1.39 | -2.81 | 8.48E-01 | 0.029 | 0.029 | 0.99 | 0.57 | -1.73 | 1.78 | 1.20E-03 | CDC16                                           | intronic       |
| 13 | 115014481 | G | A | rs138600803  | 3.20E-05 | 0.066 | 0.035 | 1.98 | 1.39 | -2.81 | 8.48E-01 | 0.029 | 0.029 | 0.99 | 0.57 | -1.73 | 1.78 | 1.20E-03 | CDC16                                           | intronic       |
| 13 | 115014494 | C | T | rs142916945  | 3.20E-05 | 0.066 | 0.035 | 1.98 | 1.39 | -2.81 | 8.48E-01 | 0.029 | 0.029 | 0.99 | 0.57 | -1.73 | 1.78 | 1.20E-03 | CDC16                                           | intronic       |
| 13 | 115014696 | G | A | rs142631957  | 3.20E-05 | 0.066 | 0.035 | 1.98 | 1.39 | -2.81 | 8.48E-01 | 0.029 | 0.029 | 0.99 | 0.57 | -1.73 | 1.78 | 1.20E-03 | CDC16                                           | intronic       |
| 13 | 115015117 | G | A | rs150562082  | 3.20E-05 | 0.066 | 0.035 | 1.98 | 1.39 | -2.81 | 8.48E-01 | 0.029 | 0.029 | 0.99 | 0.57 | -1.73 | 1.78 | 1.21E-03 | CDC16                                           |                |

|    |           |   |   |             |          |       |       |      |      |       |          |       |       |      |      |       |      |          |                                                   |            |
|----|-----------|---|---|-------------|----------|-------|-------|------|------|-------|----------|-------|-------|------|------|-------|------|----------|---------------------------------------------------|------------|
| 12 | 131027709 | A | C | rs74685552  | 4.52E-01 | 0.034 | 0.031 | 1.09 | 0.69 | -1.71 | 3.83E-05 | 0.055 | 0.024 | 2.40 | 1.56 | -3.68 | 1.93 | 1.21E-03 | RIMBP2(dist=25299), STX2(dist=246436)             | intergenic |
| 13 | 115019910 | T | C | rs138634789 | 3.21E-05 | 0.066 | 0.035 | 1.98 | 1.39 | -2.81 | 8.48E-01 | 0.029 | 0.029 | 0.99 | 0.57 | -1.73 | 1.78 | 1.21E-03 | CDC16                                             | intronic   |
| 13 | 115019741 | G | A | rs137866013 | 3.21E-05 | 0.066 | 0.035 | 1.98 | 1.39 | -2.81 | 8.48E-01 | 0.029 | 0.029 | 0.99 | 0.57 | -1.73 | 1.78 | 1.21E-03 | CDC16                                             | intronic   |
| 13 | 115019846 | A | G | rs150160234 | 3.21E-05 | 0.066 | 0.035 | 1.98 | 1.39 | -2.81 | 8.48E-01 | 0.029 | 0.029 | 0.99 | 0.57 | -1.73 | 1.78 | 1.21E-03 | CDC16                                             | intronic   |
| 16 | 76967458  | T | C | rs9932583   | 5.06E-05 | 0.126 | 0.084 | 1.58 | 1.22 | -2.04 | 8.09E-01 | 0.095 | 0.088 | 1.09 | 0.79 | -1.5  | 1.46 | 1.21E-03 | MIR4719(dist=64542), MON1B(dist=257358)           | intergenic |
| 11 | 122159576 | A | G | rs145544269 | 4.34E-01 | 0.030 | 0.027 | 1.15 | 0.71 | -1.86 | 5.93E-06 | 0.046 | 0.023 | 2.04 | 1.29 | -3.23 | 2.28 | 1.22E-03 | MIR100HG(dist=85806), UBASH3B(dist=366822)        | intergenic |
| 2  | 77986142  | C | T | rs13382556  | 3.60E-01 | 0.205 | 0.198 | 1.04 | 0.85 | -1.28 | 5.68E-05 | 0.250 | 0.189 | 1.43 | 1.15 | -1.78 | 1.41 | 1.22E-03 | LOC101927967                                      | intronic   |
| 9  | 22837962  | G | A | rs114961168 | 5.94E-01 | 0.059 | 0.056 | 1.05 | 0.74 | -1.49 | 3.15E-06 | 0.088 | 0.045 | 2.06 | 1.47 | -2.9  | 1.64 | 1.22E-03 | LINC01239(dist=13750), LOC101929563(dist=662727)  | intergenic |
| 1  | 88482310  | A | G | rs115566002 | 7.01E-01 | 0.033 | 0.032 | 1.02 | 0.64 | -1.61 | 2.11E-06 | 0.059 | 0.029 | 2.12 | 1.41 | -3.19 | 2.08 | 1.24E-03 | LINC01364(dist=644972), PKN2-AS1(dist=520886)     | intergenic |
| 2  | 236822324 | G | A | rs1962215   | 4.63E-01 | 0.115 | 0.119 | 1.04 | 0.81 | -1.35 | 5.16E-05 | 0.083 | 0.151 | 1.96 | 1.4  | -2.74 | 1.38 | 1.25E-03 | AGAP1                                             | intronic   |
| 12 | 27758946  | A | G | rs115663302 | 3.12E-01 | 0.072 | 0.064 | 1.14 | 0.83 | -1.57 | 4.14E-05 | 0.096 | 0.053 | 1.88 | 1.36 | -2.6  | 1.61 | 1.25E-03 | PPF1BP1                                           | intronic   |
| 9  | 22856478  | A | G | rs140452608 | 3.52E-01 | 0.034 | 0.030 | 1.16 | 0.74 | -1.83 | 2.68E-05 | 0.054 | 0.028 | 1.98 | 1.29 | -3.03 | 2.08 | 1.25E-03 | LINC01239(dist=32266), LOC101929563(dist=644211)  | intergenic |
| 13 | 115017282 | C | T | rs142716935 | 3.61E-05 | 0.066 | 0.035 | 1.97 | 1.38 | -2.8  | 8.58E-01 | 0.029 | 0.029 | 0.99 | 0.57 | -1.73 | 1.78 | 1.26E-03 | CDC16                                             | intronic   |
| 4  | 30170655  | A | G | rs73217435  | 3.94E-01 | 0.040 | 0.030 | 1.33 | 0.87 | -2.04 | 2.53E-05 | 0.060 | 0.038 | 1.60 | 1.07 | -2.4  | 2.18 | 1.27E-03 | MIR4275(dist=1349365), PCDH7(dist=551375)         | intergenic |
| 13 | 93124471  | G | A | rs115762242 | 1.90E-06 | 0.073 | 0.040 | 1.87 | 1.34 | -2.61 | 7.79E-01 | 0.047 | 0.047 | 1.00 | 0.65 | -1.56 | 1.75 | 1.27E-03 | GPC5                                              | intronic   |
| 1  | 154507888 | G | A | rs12037271  | 1.93E-05 | 0.273 | 0.190 | 1.60 | 1.33 | -1.94 | 8.37E-01 | 0.228 | 0.234 | 0.97 | 0.78 | -1.21 | 1.30 | 1.27E-03 | TDRD10                                            | intronic   |
| 7  | 22020122  | A | C | rs28482773  | 4.27E-01 | 0.050 | 0.044 | 1.14 | 0.78 | -1.66 | 3.47E-06 | 0.072 | 0.036 | 2.10 | 1.44 | -3.05 | 1.75 | 1.28E-03 | CDC47L(dist=34580), RAPGEF5(dist=137786)          | intergenic |
| 4  | 16900368  | G | C | rs28609650  | 2.86E-05 | 0.034 | 0.281 | 1.37 | 1.15 | -1.63 | 9.53E-01 | 0.277 | 0.269 | 1.04 | 0.84 | -1.28 | 1.27 | 1.29E-03 | LDB2                                              | UTR5       |
| 2  | 44566027  | G | A | rs6721675   | 3.79E-01 | 0.285 | 0.264 | 0.90 | 0.75 | -1.08 | 5.12E-05 | 0.328 | 0.251 | 0.68 | 0.56 | -0.84 | 0.79 | 1.29E-03 | PREPL                                             | intronic   |
| 4  | 30175469  | A | G | rs73217438  | 3.46E-01 | 0.054 | 0.041 | 1.33 | 0.92 | -1.92 | 5.63E-05 | 0.078 | 0.051 | 1.57 | 1.1  | -2.24 | 1.83 | 1.29E-03 | MIR4275(dist=1354179), PCDH7(dist=546561)         | intergenic |
| 10 | 44003499  | C | T | rs1106215   | 5.61E-05 | 0.126 | 0.078 | 0.59 | 0.45 | -0.76 | 6.60E-01 | 0.097 | 0.091 | 0.93 | 0.68 | -1.28 | 0.69 | 1.30E-03 | ZNF487(dist=25492), ZNF239(dist=48294)            | intergenic |
| 11 | 117462832 | G | T | rs114406912 | 6.80E-01 | 0.056 | 0.055 | 1.02 | 0.72 | -1.46 | 7.46E-07 | 0.085 | 0.043 | 2.10 | 1.48 | -2.96 | 1.65 | 1.30E-03 | DSCAML1                                           | intronic   |
| 1  | 60003513  | T | C | rs140035139 | 6.34E-01 | 0.041 | 0.039 | 1.06 | 0.7  | -1.6  | 4.18E-06 | 0.069 | 0.036 | 2.00 | 1.37 | -2.92 | 1.94 | 1.31E-03 | FGY2                                              | intronic   |
| 3  | 110343709 | C | T | rs907657    | 4.52E-05 | 0.350 | 0.293 | 0.77 | 0.65 | -0.92 | 8.51E-01 | 0.309 | 0.286 | 0.89 | 0.73 | -1.09 | 0.79 | 1.32E-03 | MIR4445(dist=1021965), PVRL3-AS1(dist=420454)     | intergenic |
| 14 | 63275552  | A | T | rs1826138   | 9.00E-06 | 0.365 | 0.456 | 1.46 | 1.23 | -1.72 | 7.62E-01 | 0.454 | 0.444 | 0.96 | 0.8  | -1.16 | 1.25 | 1.32E-03 | KCNH5                                             | intronic   |
| 5  | 2885688   | C | T | rs115338070 | 3.90E-01 | 0.028 | 0.024 | 1.19 | 0.73 | -1.97 | 3.16E-06 | 0.048 | 0.024 | 2.06 | 1.31 | -3.23 | 2.20 | 1.32E-03 | C5orf38(dist=130177), LINC01377(dist=292261)      | intergenic |
| 14 | 37473354  | G | A | rs2022584   | 6.39E-05 | 0.293 | 0.212 | 0.65 | 0.54 | -0.78 | 6.49E-01 | 0.255 | 0.267 | 1.06 | 0.86 | -1.31 | 0.78 | 1.32E-03 | SLC25A21                                          | intronic   |
| 15 | 91731747  | G | A | rs137903282 | 5.39E-05 | 0.075 | 0.045 | 1.74 | 1.25 | -2.41 | 9.34E-01 | 0.042 | 0.040 | 1.03 | 0.65 | -1.65 | 1.76 | 1.33E-03 | SV2B                                              | intronic   |
| 4  | 2789323   | C | G | rs743690    | 5.89E-01 | 0.035 | 0.032 | 1.10 | 0.71 | -1.72 | 5.36E-08 | 0.065 | 0.036 | 1.86 | 1.26 | -2.74 | 2.04 | 1.33E-03 | TNIP2(dist=31220), SH3BP2(dist=5427)              | intergenic |
| 13 | 110409931 | A | C | rs7996317   | 4.12E-05 | 0.138 | 0.096 | 1.51 | 1.19 | -1.93 | 7.77E-01 | 0.107 | 0.099 | 1.09 | 0.8  | -1.47 | 1.42 | 1.34E-03 | IRS2                                              | intronic   |
| 6  | 32507936  | T | C | rs71534511  | 6.31E-05 | 0.447 | 0.386 | 0.78 | 0.66 | -0.92 | 4.95E-01 | 0.329 | 0.313 | 0.93 | 0.76 | -1.13 | 0.76 | 1.34E-03 | HLA-DRB5(dist=9930), HLA-DRB6(dist=12554)         | intergenic |
| 2  | 224571742 | C | T | rs77100652  | 5.07E-01 | 0.091 | 0.088 | 1.04 | 0.79 | -1.39 | 1.83E-06 | 0.121 | 0.073 | 1.75 | 1.3  | -2.34 | 1.55 | 1.35E-03 | SCG2(dist=104525), AP1S3(dist=48305)              | intergenic |
| 14 | 37469378  | T | C | rs12050275  | 5.30E-05 | 0.300 | 0.217 | 0.65 | 0.54 | -0.78 | 7.04E-01 | 0.256 | 0.269 | 1.07 | 0.86 | -1.32 | 0.78 | 1.35E-03 | SLC25A21                                          | intronic   |
| 4  | 2785917   | C | T | rs58126961  | 3.29E-01 | 0.056 | 0.047 | 1.20 | 0.84 | -1.72 | 1.54E-05 | 0.085 | 0.054 | 1.63 | 1.16 | -2.29 | 1.77 | 1.36E-03 | TNIP2(dist=27814), SH3BP2(dist=8833)              | intergenic |
| 17 | 52147076  | C | T | rs148487204 | 2.18E-05 | 0.055 | 0.028 | 2.03 | 1.38 | -2.99 | 8.56E-01 | 0.028 | 0.028 | 1.01 | 0.58 | -1.79 | 1.86 | 1.36E-03 | KIF2B(dist=244503), TOM1L1(dist=830976)           | intergenic |
| 2  | 203069265 | C | T | rs13383137  | 1.57E-05 | 0.031 | 0.067 | 0.45 | 0.28 | -0.7  | 9.47E-01 | 0.064 | 0.065 | 0.98 | 0.67 | -1.44 | 0.64 | 1.37E-03 | KIAA2012(dist=7379), SUMO1(dist=1638)             | intergenic |
| 11 | 70637739  | G | A | rs4980647   | 4.60E-01 | 0.043 | 0.035 | 1.23 | 0.81 | -1.85 | 4.32E-05 | 0.079 | 0.048 | 1.69 | 1.19 | -2.41 | 1.76 | 1.37E-03 | SHANK2                                            | intronic   |
| 13 | 65229421  | T | C | rs359348    | 3.71E-01 | 0.345 | 0.358 | 1.06 | 0.89 | -1.26 | 5.15E-05 | 0.290 | 0.380 | 1.50 | 1.22 | -1.84 | 1.25 | 1.37E-03 | LOC102723968(dist=811163), MIR548X2(dist=1311041) | intergenic |
| 15 | 94856060  | C | T | rs28412055  | 2.81E-05 | 0.067 | 0.042 | 1.64 | 1.16 | -2.3  | 7.38E-01 | 0.034 | 0.034 | 1.01 | 0.6  | -1.68 | 2.01 | 1.38E-03 | MCTP2                                             | intronic   |
| 7  | 47792662  | C | T | rs138857248 | 9.31E-01 | 0.019 | 0.020 | 0.94 | 0.52 | -1.69 | 4.38E-08 | 0.048 | 0.020 | 2.45 | 1.55 | -3.88 | 2.49 | 1.42E-03 | C7orf65(dist=91416), LINC00525(dist=8412)         | intergenic |
| 4  | 16900435  | G | A | rs190126055 | 6.38E-06 | 0.331 | 0.265 | 1.37 | 1.15 | -1.63 | 6.19E-01 | 0.254 | 0.255 | 1.00 | 0.81 | -1.24 | 1.30 | 1.42E-03 | LDB2                                              | upstream   |
| 17 | 52149363  | G | C | rs146773515 | 2.31E-05 | 0.055 | 0.028 | 2.03 | 1.38 | -2.99 | 8.51E-01 | 0.028 | 0.028 | 1.01 | 0.57 | -1.79 | 1.85 | 1.42E-03 | KIF2B(dist=246790), TOM1L1(dist=828689)           | intergenic |
| 17 | 52148813  | C | T | rs190437775 | 2.30E-05 | 0.055 | 0.028 | 2.03 | 1.38 | -2.99 | 8.51E-01 | 0.028 | 0.028 | 1.01 | 0.57 | -1.79 | 1.85 | 1.42E-03 | KIF2B(dist=246240), TOM1L1(dist=829239)           | intergenic |
| 1  | 88486950  | T | C | rs116047066 | 7.07E-01 | 0.033 | 0.033 | 1.02 | 0.64 | -1.6  | 2.27E-05 | 0.061 | 0.028 | 2.25 | 1.5  | -3.37 | 1.95 | 1.43E-03 | LINC01364(dist=649612), PKN2-AS1(dist=516246)     | intergenic |
| 17 | 52145988  | C | T | rs141975597 | 2.30E-05 | 0.055 | 0.028 | 2.03 | 1.38 | -2.99 | 8.51E-01 | 0.028 | 0.028 | 1.01 | 0.58 | -1.79 | 1.85 | 1.43E-03 | KIF2B(dist=243415), TOM1L1(dist=832064)           | intergenic |
| 5  | 30803294  | A | G | rs79114176  | 3.97E-06 | 0.055 | 0.025 | 2.27 | 1.54 | -3.37 | 7.40E-01 | 0.026 | 0.029 | 0.91 | 0.51 | -1.62 | 2.06 | 1.43E-03 | LOC101929681(dist=1407211), CDH6(dist=390468)     | intergenic |
| 18 | 59381638  | G | A | rs73446731  | 3.60E-01 | 0.033 | 0.028 | 1.19 | 0.75 | -1.89 | 3.44E-05 | 0.050 | 0.021 | 2.44 | 1.56 | -3.81 | 1.94 | 1.43E-03 | CDH20(dist=159273), LINC01544(dist=33771)         | intergenic |
| 4  | 17009054  | G | A | rs114229179 | 1.04E-05 | 0.156 | 0.103 | 1.61 | 1.28 | -2.03 | 7.68E-01 | 0.104 | 0.104 | 1.00 | 0.74 | -1.36 | 1.41 | 1.43E-03 | LDB2(dist=108622), LOC101929123(dist=164326)      | intergenic |
| 20 | 52823923  | T | C | rs80319950  | 8.28E-01 | 0.057 | 0.054 | 1.07 | 0.75 | -1.52 | 4.52E-07 | 0.094 | 0.058 | 1.68 | 1.21 | -2.33 | 1.79 | 1.46E-03 | PFND4                                             | upstream   |
| 3  | 141474757 | A | G | rs77360075  | 2.92E-01 | 0.029 | 0.023 | 1.24 | 0.75 | -2.03 | 2.22E-06 | 0.043 | 0.022 | 1.95 | 1.21 | -3.14 | 2.34 | 1.47E-03 | RNF7(dist=9112), GRK7(dist=22286)                 | intergenic |
| 8  | 60034329  | G | A | rs10957078  | 8.26E-06 | 0.247 | 0.330 | 0.66 | 0.55 | -0.8  | 6.62E-01 | 0.314 | 0.302 | 1.05 | 0.86 | -1.29 | 0.80 | 1.47E-03 | TOX(dist=2562), CA8(dist=1067094)                 | intergenic |
| 1  | 154514067 | G | A | rs11265632  | 2.23E-05 | 0.274 | 0.191 | 1.60 | 1.32 | -1.93 | 8.60E-01 | 0.229 | 0.235 | 0.97 | 0.77 | -1.21 | 1.30 | 1.47E-03 | TDRD10                                            | intronic   |
| 11 | 17403528  | C | T | rs72865058  | 7.97E-01 | 0.022 | 0.022 | 1.02 | 0.59 | -1.77 | 6.63E-07 | 0.065 | 0.034 | 1.99 | 1.35 | -2.95 | 2.05 | 1.49E-03 | NCR3LG1(dist=4660), KCNJ11(dist=3268)             | intergenic |
| 4  | 80843132  | T | G | rs75210509  | 5.76E-05 | 0.041 | 0.024 | 1.77 | 1.15 | -2.74 | 7.71E-01 | 0.031 | 0.028 | 1.13 | 0.66 | -1.94 | 2.38 | 1.49E-03 | ANTXR2                                            | intronic   |
| 7  | 153913004 | A | G | rs4507682   | 5.75E-05 | 0.225 | 0.168 | 1.43 | 1.17 | -1.75 | 9.62E-01 | 0.159 | 0.154 | 1.04 | 0.81 | -1.34 | 1.33 | 1.49E-03 | DPP6                                              | intronic   |
| 2  | 113664501 | A | C | rs10170349  | 4.56E-01 | 0.161 | 0.176 | 0.90 | 0.72 | -1.12 | 2.95E-05 | 0.091 | 0.159 | 0.53 | 0.38 | -0.73 | 0.75 | 1.50E-03 | IL1B(dist=70145), IL37(dist=6047)                 | intergenic |
| 6  | 150638002 | C | T | rs9371391   | 2.22E-05 | 0.484 | 0.470 | 0.74 | 0.63 | -0.88 | 9.91E-01 | 0.489 |       |      |      |       |      |          |                                                   |            |

|    |           |   |   |                        |          |       |       |      |      |       |          |       |       |      |      |       |      |          |                                                  |                |
|----|-----------|---|---|------------------------|----------|-------|-------|------|------|-------|----------|-------|-------|------|------|-------|------|----------|--------------------------------------------------|----------------|
| 1  | 154488533 | A | G | rs12128408             | 2.13E-05 | 0.272 | 0.190 | 1.60 | 1.32 | -1.93 | 8.75E-01 | 0.231 | 0.237 | 0.97 | 0.77 | -1.21 | 1.30 | 1.56E-03 | TDRD10                                           | intronic       |
| 1  | 60018078  | C | T | rs7523743              | 4.41E-01 | 0.045 | 0.041 | 1.12 | 0.75 | -1.66 | 4.87E-05 | 0.072 | 0.037 | 2.03 | 1.4  | -2.95 | 1.72 | 1.56E-03 | FGGY                                             | intronic       |
| 13 | 104888864 | A | G | rs73598634             | 1.02E-05 | 0.048 | 0.024 | 2.01 | 1.33 | -3.03 | 9.36E-01 | 0.025 | 0.025 | 1.02 | 0.56 | -1.86 | 2.08 | 1.56E-03 | LINC01309(dist=808829), DAOA-AS1(dist=1222542)   | intergenic     |
| 4  | 2785064   | C | T | rs146082122            | 6.48E-01 | 0.036 | 0.034 | 1.08 | 0.7  | -1.68 | 3.67E-08 | 0.065 | 0.036 | 1.85 | 1.25 | -2.73 | 2.05 | 1.56E-03 | TNIP2(dist=26961), SH3BP2(dist=9686)             | intergenic     |
| 4  | 135575704 | A | G | rs115221071            | 7.37E-01 | 0.031 | 0.030 | 1.05 | 0.66 | -1.69 | 2.02E-06 | 0.059 | 0.029 | 2.13 | 1.42 | -3.22 | 2.00 | 1.57E-03 | PABPC4L(dist=452801), LINC00613(dist=1212434)    | intergenic     |
| 11 | 22682026  | C | G | rs77110345             | 5.26E-01 | 0.034 | 0.032 | 1.06 | 0.68 | -1.67 | 2.95E-05 | 0.060 | 0.026 | 2.35 | 1.56 | -3.54 | 1.87 | 1.57E-03 | FANCF(dist=34639), GAS2(dist=6134)               | intergenic     |
| 11 | 22674802  | A | G | rs114911974            | 5.64E-01 | 0.034 | 0.032 | 1.06 | 0.68 | -1.67 | 2.95E-05 | 0.060 | 0.026 | 2.35 | 1.56 | -3.55 | 1.86 | 1.58E-03 | FANCF(dist=27415), GAS2(dist=13358)              | intergenic     |
| 1  | 154511502 | T | C | rs12136771             | 2.29E-05 | 0.274 | 0.191 | 1.60 | 1.32 | -1.93 | 8.76E-01 | 0.229 | 0.235 | 0.97 | 0.77 | -1.21 | 1.30 | 1.58E-03 | TDRD10                                           | intronic       |
| 1  | 60012158  | A | T | rs17119589             | 4.49E-01 | 0.045 | 0.041 | 1.12 | 0.75 | -1.66 | 4.82E-05 | 0.072 | 0.037 | 2.03 | 1.4  | -2.95 | 1.72 | 1.60E-03 | FGGY                                             | intronic       |
| 11 | 117452133 | A | G | rs115201545            | 8.52E-01 | 0.055 | 0.055 | 0.99 | 0.69 | -1.41 | 9.81E-07 | 0.089 | 0.043 | 2.17 | 1.55 | -3.05 | 1.61 | 1.60E-03 | DSCAML1                                          | intronic       |
| 17 | 65080635  | C | T | rs113893581            | 4.52E-01 | 0.034 | 0.031 | 1.12 | 0.71 | -1.76 | 4.50E-05 | 0.061 | 0.030 | 2.10 | 1.4  | -3.14 | 1.93 | 1.61E-03 | HELZ                                             | intronic       |
| 12 | 25153270  | A | G | rs116800187            | 4.30E-01 | 0.080 | 0.076 | 1.05 | 0.78 | -1.42 | 3.30E-05 | 0.118 | 0.070 | 1.77 | 1.32 | -2.38 | 1.53 | 1.61E-03 | C12orf77(dist=2897), LRMP(dist=51911)            | intergenic     |
| 10 | 74068998  | G | A | rs4433500              | 5.10E-01 | 0.329 | 0.306 | 0.90 | 0.76 | -1.07 | 2.76E-05 | 0.416 | 0.335 | 0.71 | 0.59 | -0.86 | 0.79 | 1.62E-03 | KIF2B(dist=33201), DNAJB12(dist=23590)           | intergenic     |
| 4  | 92096026  | A | G | rs6532280              | 5.30E-01 | 0.336 | 0.315 | 1.10 | 0.92 | -1.3  | 2.72E-05 | 0.405 | 0.326 | 1.41 | 1.16 | -1.7  | 1.25 | 1.62E-03 | CCSER1                                           | intronic       |
| 18 | 59576182  | A | T | rs11876731             | 5.25E-01 | 0.119 | 0.116 | 1.02 | 0.8  | -1.32 | 1.71E-05 | 0.170 | 0.106 | 1.72 | 1.33 | -2.21 | 1.40 | 1.64E-03 | RNF152(dist=15878), PIGN(dist=135276)            | intergenic     |
| 11 | 117451192 | G | A | rs115668269            | 8.60E-01 | 0.054 | 0.055 | 0.99 | 0.69 | -1.41 | 9.66E-07 | 0.089 | 0.043 | 2.17 | 1.55 | -3.05 | 1.61 | 1.64E-03 | DSCAML1                                          | intronic       |
| 20 | 50190010  | G | T | rs6096484              | 2.41E-01 | 0.029 | 0.022 | 1.30 | 0.79 | -2.15 | 3.50E-05 | 0.042 | 0.022 | 1.91 | 1.18 | -3.08 | 2.24 | 1.64E-03 | NFATC2(dist=10640), ATP9A(dist=23304)            | intergenic     |
| 9  | 22881971  | G | T | rs187819040            | 6.40E-01 | 0.063 | 0.061 | 1.04 | 0.75 | -1.46 | 1.98E-06 | 0.093 | 0.048 | 2.01 | 1.44 | -2.8  | 1.60 | 1.65E-03 | LINC01239(dist=57759), LOC101929563(dist=618718) | intergenic     |
| 11 | 117471346 | G | C | rs114151539            | 7.72E-01 | 0.051 | 0.050 | 1.01 | 0.7  | -1.46 | 7.45E-07 | 0.085 | 0.043 | 2.08 | 1.47 | -2.93 | 1.66 | 1.65E-03 | DSCAML1                                          | intronic       |
| 10 | 42607692  | T | C | rs10899776;rs386743106 | 9.14E-06 | 0.192 | 0.132 | 0.64 | 0.52 | -0.79 | 9.38E-01 | 0.186 | 0.186 | 1.00 | 0.79 | -1.27 | 0.71 | 1.65E-03 | NONE(dist=NONE), LOC441666(dist=219622)          | intergenic     |
| 2  | 234588585 | G | A | rs7579530              | 5.70E-01 | 0.286 | 0.294 | 1.04 | 0.87 | -1.25 | 1.71E-05 | 0.192 | 0.284 | 1.67 | 1.32 | -2.12 | 1.25 | 1.66E-03 | UGT1A10, UGT1A8, UGT1A9                          | intronic       |
| 19 | 5538183   | G | A | rs34318315             | 2.31E-06 | 0.077 | 0.037 | 2.16 | 1.55 | -3.01 | 7.43E-01 | 0.060 | 0.068 | 0.88 | 0.59 | -1.3  | 1.68 | 1.66E-03 | ZNRF4(dist=81316), TINCR(dist=19995)             | intergenic     |
| 17 | 52149042  | C | T | rs112664257            | 2.83E-05 | 0.056 | 0.029 | 1.99 | 1.36 | -2.91 | 8.17E-01 | 0.028 | 0.028 | 1.00 | 0.57 | -1.76 | 1.82 | 1.67E-03 | KIF2B(dist=246469), TOM1L1(dist=829010)          | intergenic     |
| 21 | 27406078  | G | A | rs8127138              | 1.73E-05 | 0.073 | 0.040 | 1.90 | 1.36 | -2.66 | 8.58E-01 | 0.040 | 0.041 | 0.98 | 0.61 | -1.57 | 1.69 | 1.67E-03 | APP                                              | intronic       |
| 9  | 16139260  | A | G | rs7870624              | 5.70E-01 | 0.174 | 0.172 | 1.01 | 0.82 | -1.26 | 1.18E-05 | 0.225 | 0.152 | 1.62 | 1.3  | -2.04 | 1.36 | 1.68E-03 | CCDC171(dist=167363), C9orf92(dist=64673)        | intergenic     |
| 15 | 83261434  | C | T | rs116407112            | 6.87E-01 | 0.042 | 0.046 | 0.91 | 0.61 | -1.36 | 3.48E-09 | 0.085 | 0.042 | 2.10 | 1.49 | -2.97 | 1.81 | 1.68E-03 | CPEB1                                            | intronic       |
| 5  | 106029422 | G | T | rs73777730             | 4.53E-05 | 0.163 | 0.236 | 0.63 | 0.51 | -0.78 | 8.15E-01 | 0.202 | 0.200 | 1.02 | 0.8  | -1.28 | 0.77 | 1.69E-03 | ST8SIA4(dist=390433), SLC04C1(dist=940270)       | intergenic     |
| 1  | 154494480 | C | G | rs10908843             | 2.18E-05 | 0.272 | 0.189 | 1.60 | 1.33 | -1.93 | 9.04E-01 | 0.228 | 0.235 | 0.96 | 0.77 | -1.2  | 1.29 | 1.70E-03 | TDRD10                                           | intronic       |
| 1  | 154496489 | C | T | rs11265628             | 2.15E-05 | 0.272 | 0.189 | 1.60 | 1.33 | -1.93 | 9.08E-01 | 0.227 | 0.234 | 0.96 | 0.77 | -1.2  | 1.29 | 1.71E-03 | TDRD10                                           | intronic       |
| 9  | 91334432  | A | G | rs1547847              | 6.49E-01 | 0.176 | 0.161 | 0.90 | 0.72 | -1.11 | 2.88E-06 | 0.252 | 0.187 | 0.69 | 0.55 | -0.85 | 0.75 | 1.71E-03 | LOC286238(dist=67357), MIR4289(dist=26319)       | intergenic     |
| 1  | 154492702 | G | A | rs10908842             | 2.40E-05 | 0.272 | 0.189 | 1.60 | 1.32 | -1.93 | 8.91E-01 | 0.228 | 0.235 | 0.96 | 0.77 | -1.2  | 1.29 | 1.72E-03 | TDRD10                                           | intronic       |
| 4  | 16899823  | T | A | rs10032816             | 4.26E-05 | 0.342 | 0.276 | 1.37 | 1.15 | -1.62 | 9.39E-01 | 0.275 | 0.268 | 1.04 | 0.84 | -1.28 | 1.26 | 1.73E-03 | LDB2                                             | intronic       |
| 10 | 36124547  | G | A | rs76191871             | 1.35E-03 | 0.046 | 0.023 | 2.01 | 1.32 | -3.07 | 4.27E-05 | 0.054 | 0.036 | 1.51 | 0.99 | -2.3  | 2.56 | 1.73E-03 | LINC01452(dist=34699), ANKRD30A(dist=1290238)    | intergenic     |
| 12 | 53785245  | A | T | rs147801318            | 6.89E-01 | 0.025 | 0.023 | 1.07 | 0.63 | -1.82 | 1.85E-05 | 0.056 | 0.025 | 2.29 | 1.51 | -3.5  | 2.01 | 1.74E-03 | SP1                                              | intronic       |
| 6  | 16368821  | A | G | rs111831951            | 4.94E-05 | 0.042 | 0.024 | 1.77 | 1.15 | -2.72 | 8.00E-01 | 0.024 | 0.021 | 1.15 | 0.62 | -2.13 | 2.41 | 1.75E-03 | ATXN1                                            | intronic       |
| 1  | 168792244 | C | T | rs61801628             | 7.10E-01 | 0.025 | 0.022 | 1.16 | 0.69 | -1.96 | 5.43E-05 | 0.058 | 0.030 | 1.98 | 1.31 | -2.99 | 2.09 | 1.75E-03 | LINC00626(dist=30118), LINC00970(dist=80899)     | intergenic     |
| 15 | 83325529  | G | A | rs66793760             | 6.10E-01 | 0.339 | 0.340 | 0.99 | 0.84 | -1.18 | 1.58E-05 | 0.416 | 0.317 | 1.54 | 1.27 | -1.86 | 1.24 | 1.75E-03 | CPEB1-AS1                                        | ncRNA_intronic |
| 1  | 168792003 | A | T | rs61801627             | 7.17E-01 | 0.025 | 0.022 | 1.16 | 0.68 | -1.96 | 5.26E-05 | 0.057 | 0.030 | 1.98 | 1.31 | -2.99 | 2.10 | 1.76E-03 | LINC00626(dist=29877), LINC00970(dist=81140)     | intergenic     |
| 15 | 41709168  | C | T | rs114706939            | 6.25E-05 | 0.092 | 0.060 | 1.59 | 1.18 | -2.13 | 8.90E-01 | 0.046 | 0.045 | 1.03 | 0.66 | -1.61 | 1.61 | 1.76E-03 | RTF1                                             | intronic       |
| 11 | 117461570 | T | C | rs116603337            | 8.28E-01 | 0.054 | 0.054 | 0.99 | 0.69 | -1.42 | 5.31E-07 | 0.084 | 0.042 | 2.13 | 1.5  | -3.01 | 1.64 | 1.76E-03 | DSCAML1                                          | intronic       |
| 1  | 183040472 | C | T | rs73051761             | 6.49E-05 | 0.056 | 0.028 | 2.03 | 1.38 | -2.98 | 9.68E-01 | 0.026 | 0.024 | 1.07 | 0.59 | -1.93 | 1.84 | 1.76E-03 | LAMC1                                            | intronic       |
| 1  | 154479670 | C | T | rs6664608              | 2.97E-05 | 0.269 | 0.188 | 1.59 | 1.32 | -1.92 | 8.52E-01 | 0.230 | 0.235 | 0.97 | 0.78 | -1.21 | 1.29 | 1.76E-03 | TDRD10                                           | intronic       |
| 1  | 183044820 | C | T | rs73051766             | 6.44E-05 | 0.056 | 0.028 | 2.03 | 1.38 | -2.98 | 9.69E-01 | 0.026 | 0.024 | 1.07 | 0.59 | -1.93 | 1.84 | 1.77E-03 | LAMC1                                            | intronic       |
| 15 | 50279418  | A | C | rs28590156             | 2.13E-05 | 0.051 | 0.026 | 2.00 | 1.34 | -2.98 | 9.75E-01 | 0.032 | 0.031 | 1.04 | 0.61 | -1.76 | 1.91 | 1.77E-03 | ATP8B4                                           | intronic       |
| 1  | 183046268 | G | T | rs78996086             | 6.44E-05 | 0.056 | 0.028 | 2.03 | 1.38 | -2.98 | 9.69E-01 | 0.026 | 0.024 | 1.07 | 0.59 | -1.93 | 1.84 | 1.77E-03 | LAMC1                                            | intronic       |
| 14 | 21239104  | G | C | rs17096253             | 6.07E-05 | 0.333 | 0.268 | 1.37 | 1.15 | -1.63 | 9.28E-01 | 0.246 | 0.235 | 1.06 | 0.85 | -1.32 | 1.26 | 1.78E-03 | EDDM3B(NM_022360:c.*351G>C)                      | UTR3           |
| 15 | 41517947  | A | T | rs115691692            | 3.55E-05 | 0.149 | 0.103 | 1.52 | 1.2  | -1.93 | 6.62E-01 | 0.073 | 0.076 | 0.97 | 0.68 | -1.38 | 1.43 | 1.79E-03 | EXD1                                             | intronic       |
| 1  | 154505270 | C | T | rs12407048             | 2.17E-05 | 0.272 | 0.189 | 1.60 | 1.33 | -1.93 | 9.28E-01 | 0.227 | 0.234 | 0.96 | 0.77 | -1.2  | 1.29 | 1.79E-03 | TDRD10                                           | intronic       |
| 5  | 132268861 | G | A | rs10900813             | 6.76E-01 | 0.060 | 0.052 | 1.16 | 0.82 | -1.64 | 3.15E-05 | 0.108 | 0.070 | 1.61 | 1.19 | -2.19 | 1.63 | 1.79E-03 | AFF4                                             | intronic       |
| 15 | 41516685  | A | G | rs77192017             | 3.65E-05 | 0.150 | 0.104 | 1.52 | 1.2  | -1.93 | 6.65E-01 | 0.074 | 0.076 | 0.97 | 0.68 | -1.38 | 1.43 | 1.80E-03 | EXD1                                             | intronic       |
| 1  | 154477440 | G | A | rs12118018             | 4.20E-05 | 0.275 | 0.196 | 1.56 | 1.29 | -1.88 | 7.92E-01 | 0.245 | 0.249 | 0.98 | 0.79 | -1.21 | 1.29 | 1.81E-03 | TDRD10                                           | intronic       |
| 17 | 52226967  | T | C | rs114329480            | 2.88E-05 | 0.056 | 0.029 | 2.01 | 1.37 | -2.95 | 8.04E-01 | 0.029 | 0.030 | 0.99 | 0.57 | -1.72 | 1.81 | 1.82E-03 | KIF2B(dist=324394), TOM1L1(dist=751085)          | intergenic     |
| 4  | 147395797 | A | C | rs4835313              | 5.16E-01 | 0.200 | 0.189 | 0.93 | 0.76 | -1.14 | 4.56E-05 | 0.251 | 0.183 | 0.67 | 0.54 | -0.83 | 0.77 | 1.83E-03 | SLC10A7                                          | intronic       |
| 2  | 44565266  | C | A | rs4953091              | 4.45E-01 | 0.286 | 0.267 | 0.91 | 0.76 | -1.09 | 5.60E-05 | 0.333 | 0.255 | 0.69 | 0.56 | -0.84 | 0.80 | 1.83E-03 | PREPL                                            | intronic       |
| 5  | 171385823 | C | T | rs7730547              | 6.97E-01 | 0.060 | 0.057 | 1.07 | 0.76 | -1.5  | 3.69E-05 | 0.109 | 0.065 | 1.75 | 1.29 | -2.38 | 1.58 | 1.84E-03 | FBXW11                                           | intronic       |
| 13 | 93120158  | C | G | rs115784027            | 5.80E-06 | 0.073 | 0.042 | 1.81 | 1.3  | -2.53 | 8.11E-01 | 0.048 | 0.048 | 1.01 | 0.65 | -1.56 | 1.71 | 1.84E-03 | GPC5                                             | intronic       |
| 3  | 132090619 | A | G | rs142717267            | 4.77E-01 | 0.044 | 0.039 | 1.12 | 0.75 | -1.68 | 3.89E-06 | 0.067 | 0.040 | 1.72 | 1.17 | -2.51 | 1.94 | 1.85E-03 | ACPP(dist=3473), DNAJC13(dist=45934)             | intergenic     |
| 18 | 59572374  | G | C | rs76635470             | 5.07E-01 | 0.120 | 0.117 | 1.03 | 0.8  | -1.32 | 2.45E-05 | 0.16  |       |      |      |       |      |          |                                                  |                |

|    |           |   |   |                                   |          |       |       |      |      |       |          |       |       |      |      |       |      |          |                                                   |                |
|----|-----------|---|---|-----------------------------------|----------|-------|-------|------|------|-------|----------|-------|-------|------|------|-------|------|----------|---------------------------------------------------|----------------|
| 10 | 42635908  | T | A | rs10900238                        | 1.89E-05 | 0.144 | 0.097 | 0.64 | 0.5  | -0.81 | 7.78E-01 | 0.155 | 0.154 | 0.99 | 0.76 | -1.28 | 0.67 | 1.92E-03 | NONE(dist=NONE), LOC441666(dist=191406)           | intergenic     |
| 11 | 22652212  | G | A | rs114490427                       | 5.57E-01 | 0.034 | 0.032 | 1.07 | 0.68 | -1.68 | 4.24E-05 | 0.060 | 0.027 | 2.34 | 1.55 | -3.53 | 1.82 | 1.92E-03 | FANCF(dist=4825), GAS2(dist=35948)                | intergenic     |
| 2  | 44842961  | C | A | rs6745785                         | 9.13E-01 | 0.037 | 0.030 | 0.81 | 0.53 | -1.26 | 9.63E-07 | 0.089 | 0.053 | 0.58 | 0.41 | -0.8  | 0.56 | 1.93E-03 | CAMKMT                                            | intronic       |
| 5  | 94453002  | G | A | rs182843187                       | 2.12E-05 | 0.045 | 0.024 | 1.90 | 1.25 | -2.9  | 6.97E-01 | 0.022 | 0.023 | 0.98 | 0.52 | -1.84 | 2.37 | 1.94E-03 | MCTP1                                             | intronic       |
| 19 | 52789158  | G | A | rs76980680                        | 7.23E-01 | 0.162 | 0.158 | 1.03 | 0.83 | -1.29 | 4.73E-06 | 0.222 | 0.152 | 1.59 | 1.26 | -1.99 | 1.34 | 1.94E-03 | ZNF766                                            | intronic       |
| 14 | 99846962  | G | A | rs2754066                         | 1.76E-05 | 0.138 | 0.201 | 1.58 | 1.25 | -1.99 | 8.77E-01 | 0.191 | 0.187 | 0.98 | 0.77 | -1.24 | 1.31 | 1.95E-03 | BCL11B(dist=108912), SETD3(dist=17121)            | intergenic     |
| 14 | 63256420  | C | A | rs1586649                         | 4.08E-05 | 0.441 | 0.358 | 1.42 | 1.2  | -1.67 | 9.58E-01 | 0.372 | 0.378 | 0.98 | 0.8  | -1.18 | 1.25 | 1.95E-03 | KCNH5                                             | intronic       |
| 16 | 80509220  | G | A | rs8044949                         | 3.95E-01 | 0.057 | 0.053 | 1.08 | 0.76 | -1.54 | 2.21E-05 | 0.071 | 0.041 | 1.90 | 1.24 | -2.61 | 1.79 | 1.96E-03 | LOC102724084                                      | ncRNA_intronic |
| 2  | 224571409 | G | A | rs113761502                       | 3.25E-01 | 0.174 | 0.167 | 1.06 | 0.85 | -1.31 | 6.18E-05 | 0.201 | 0.142 | 1.52 | 1.2  | -1.93 | 1.35 | 1.97E-03 | SCG2(dist=104192), AP1S3(dist=48638)              | intergenic     |
| 2  | 143539861 | T | C | rs75300581                        | 3.22E-01 | 0.035 | 0.025 | 1.43 | 0.91 | -2.27 | 6.49E-05 | 0.055 | 0.033 | 1.70 | 1.11 | -2.58 | 2.05 | 1.97E-03 | LRP1B(dist=650591), KYNU(dist=95334)              | intergenic     |
| 13 | 115014048 | T | C | rs12583737                        | 5.78E-05 | 0.071 | 0.039 | 1.91 | 1.36 | -2.68 | 8.09E-01 | 0.032 | 0.032 | 0.99 | 0.58 | -1.69 | 1.69 | 1.98E-03 | CDC16                                             | intronic       |
| 3  | 194978874 | A | T | rs114281307                       | 6.29E-01 | 0.031 | 0.029 | 1.07 | 0.67 | -1.72 | 1.39E-05 | 0.048 | 0.023 | 2.09 | 1.33 | -3.28 | 2.37 | 1.98E-03 | XXYLT1                                            | intronic       |
| 13 | 65227118  | A | G | rs6650415                         | 4.49E-01 | 0.335 | 0.346 | 1.05 | 0.88 | -1.25 | 5.74E-05 | 0.283 | 0.373 | 1.51 | 1.23 | -1.86 | 1.24 | 1.98E-03 | LOC102723968(dist=808860), MIR548X2(dist=1313344) | intergenic     |
| 1  | 180196654 | C | T | rs115731305                       | 4.98E-05 | 0.136 | 0.093 | 1.54 | 1.2  | -1.96 | 9.35E-01 | 0.085 | 0.082 | 1.03 | 0.74 | -1.45 | 1.46 | 1.99E-03 | FLJ23867(dist=26795), LHX4(dist=2779)             | intergenic     |
| 4  | 3812204   | T | C | rs28454988                        | 6.92E-01 | 0.261 | 0.259 | 0.99 | 0.82 | -1.19 | 1.44E-05 | 0.335 | 0.247 | 0.65 | 0.53 | -0.8  | 0.78 | 1.99E-03 | ADRA2C(dist=41951), FAM86EP(dist=131283)          | intergenic     |
| 15 | 62100771  | C | T | rs73426758                        | 2.01E-05 | 0.057 | 0.031 | 1.87 | 1.29 | -2.73 | 8.30E-01 | 0.030 | 0.030 | 0.99 | 0.57 | -1.7  | 1.87 | 1.99E-03 | RORA(dist=579269), VPS13C(dist=43819)             | intergenic     |
| 11 | 22646046  | A | C | rs45473997                        | 5.81E-01 | 0.034 | 0.032 | 1.06 | 0.68 | -1.67 | 3.74E-05 | 0.060 | 0.026 | 2.36 | 1.56 | -3.55 | 1.81 | 2.00E-03 | FANCF(NM_022725:c.*186T>G)                        | UTR3           |
| 17 | 65253562  | G | C | rs57681212                        | 8.68E-01 | 0.027 | 0.027 | 1.00 | 0.6  | -1.66 | 3.09E-06 | 0.050 | 0.024 | 2.40 | 1.57 | -3.65 | 2.02 | 2.00E-03 | HELZ(dist=12243), PSMD12(dist=83057)              | intergenic     |
| 7  | 41234037  | A | G | rs73687954                        | 4.78E-01 | 0.094 | 0.089 | 1.06 | 0.8  | -1.41 | 6.34E-06 | 0.125 | 0.079 | 1.67 | 1.25 | -2.22 | 1.52 | 2.01E-03 | LINC01449(dist=60938), INHBA(dist=494564)         | intergenic     |
| 13 | 115021722 | G | C | rs17291355                        | 5.95E-05 | 0.071 | 0.039 | 1.91 | 1.36 | -2.67 | 8.09E-01 | 0.032 | 0.032 | 0.99 | 0.58 | -1.69 | 1.69 | 2.01E-03 | CDC16                                             | intronic       |
| 3  | 53419887  | C | T | rs72954845                        | 4.83E-01 | 0.113 | 0.105 | 1.08 | 0.83 | -1.4  | 2.01E-05 | 0.129 | 0.075 | 1.83 | 1.38 | -2.44 | 1.42 | 2.01E-03 | DCP1A(dist=38233), CACNA1D(dist=109189)           | intergenic     |
| 17 | 65167971  | G | A | rs111788648                       | 8.09E-01 | 0.028 | 0.028 | 1.03 | 0.63 | -1.69 | 1.73E-06 | 0.055 | 0.024 | 2.42 | 1.58 | -3.71 | 1.99 | 2.02E-03 | HELZ                                              | intronic       |
| 12 | 59951147  | C | A | rs74093388                        | 5.09E-05 | 0.141 | 0.092 | 1.61 | 1.26 | -2.05 | 9.94E-01 | 0.104 | 0.105 | 0.99 | 0.73 | -1.34 | 1.40 | 2.02E-03 | LRI3G3(dist=636828), SLC16A7(dist=38674)          | intergenic     |
| 14 | 21239846  | A | C | rs79214935                        | 1.60E-05 | 0.165 | 0.116 | 1.51 | 1.2  | -1.89 | 6.92E-01 | 0.105 | 0.105 | 1.00 | 0.73 | -1.35 | 1.43 | 2.02E-03 | EDDM3B                                            | downstream     |
| 17 | 52226025  | C | T | rs140375751                       | 3.07E-05 | 0.056 | 0.029 | 2.00 | 1.36 | -2.93 | 7.84E-01 | 0.030 | 0.030 | 0.98 | 0.57 | -1.7  | 1.80 | 2.02E-03 | KIF2B(dist=323452), TOM1L1(dist=752027)           | intergenic     |
| 17 | 52227038  | G | A | rs138171009                       | 1.24E-05 | 0.062 | 0.032 | 2.00 | 1.39 | -2.88 | 5.96E-01 | 0.030 | 0.033 | 0.92 | 0.53 | -1.59 | 1.77 | 2.02E-03 | KIF2B(dist=324465), TOM1L1(dist=751014)           | intergenic     |
| 21 | 40652231  | T | C | rs77792104                        | 7.34E-01 | 0.040 | 0.039 | 1.03 | 0.68 | -1.56 | 1.37E-05 | 0.074 | 0.035 | 2.17 | 1.5  | -3.14 | 1.77 | 2.03E-03 | BRWD1                                             | intronic       |
| 2  | 234586814 | A | G | rs7587916                         | 6.00E-01 | 0.280 | 0.292 | 1.04 | 0.87 | -1.24 | 2.05E-05 | 0.192 | 0.283 | 1.66 | 1.31 | -2.1  | 1.24 | 2.03E-03 | UGT1A10, UGT1A8, UGT1A9                           | intronic       |
| 14 | 63271562  | C | T | rs1387754                         | 1.35E-05 | 0.377 | 0.464 | 1.43 | 1.21 | -1.7  | 7.22E-01 | 0.471 | 0.462 | 0.97 | 0.8  | -1.16 | 1.23 | 2.03E-03 | KCNH5                                             | intronic       |
| 3  | 195022991 | A | C | rs77749568                        | 7.21E-06 | 0.053 | 0.029 | 1.85 | 1.25 | -2.73 | 5.44E-01 | 0.025 | 0.027 | 0.94 | 0.52 | -1.7  | 2.08 | 2.03E-03 | ACAP2                                             | intronic       |
| 13 | 115024553 | A | G | rs3861103                         | 6.05E-05 | 0.071 | 0.039 | 1.90 | 1.36 | -2.67 | 8.08E-01 | 0.032 | 0.032 | 0.99 | 0.58 | -1.69 | 1.69 | 2.04E-03 | CDC16                                             | intronic       |
| 14 | 21239628  | G | T | rs7148183                         | 6.46E-05 | 0.330 | 0.265 | 1.36 | 1.14 | -1.63 | 9.83E-01 | 0.240 | 0.231 | 1.05 | 0.85 | -1.31 | 1.26 | 2.05E-03 | EDDM3B                                            | downstream     |
| 19 | 52240318  | T | C | rs11670567                        | 6.23E-05 | 0.357 | 0.282 | 1.41 | 1.19 | -1.68 | 8.52E-01 | 0.312 | 0.312 | 1.00 | 0.82 | -1.22 | 1.25 | 2.05E-03 | HAS1(dist=13073), FPR1(dist=8705)                 | intergenic     |
| 3  | 194975997 | G | A | rs11915519                        | 6.49E-01 | 0.030 | 0.028 | 1.07 | 0.66 | -1.73 | 1.38E-05 | 0.047 | 0.023 | 2.11 | 1.34 | -3.32 | 2.36 | 2.05E-03 | XXYLT1                                            | intronic       |
| 10 | 104617933 | A | T | rs144499417                       | 2.74E-05 | 0.112 | 0.074 | 1.57 | 1.2  | -2.05 | 8.58E-01 | 0.072 | 0.076 | 0.94 | 0.66 | -1.35 | 1.64 | 2.06E-03 | C10orf32-ASMT                                     | ncRNA_intronic |
| 3  | 25626516  | T | C | rs74318739                        | 6.33E-01 | 0.077 | 0.075 | 1.03 | 0.76 | -1.4  | 2.60E-05 | 0.114 | 0.074 | 1.62 | 1.2  | -2.18 | 1.63 | 2.06E-03 | RARB                                              | intronic       |
| 6  | 91383115  | A | C | rs2750469                         | 1.19E-05 | 0.232 | 0.172 | 0.69 | 0.57 | -0.84 | 6.93E-01 | 0.176 | 0.183 | 1.05 | 0.82 | -1.35 | 0.72 | 2.07E-03 | MAP3K7(dist=86095), MIR4643(dist=848263)          | intergenic     |
| 9  | 22879812  | C | G | rs75579508                        | 6.45E-01 | 0.061 | 0.059 | 1.04 | 0.74 | -1.47 | 3.75E-06 | 0.090 | 0.047 | 2.00 | 1.43 | -2.79 | 1.58 | 2.07E-03 | LINC01239(dist=55600), LOC101929563(dist=620877)  | intergenic     |
| 1  | 152175398 | G | A | rs12409762                        | 4.14E-05 | 0.277 | 0.212 | 1.43 | 1.19 | -1.72 | 9.46E-01 | 0.219 | 0.217 | 1.01 | 0.81 | -1.27 | 1.27 | 2.11E-03 | RPTN(dist=43694), HRNR(dist=9154)                 | intergenic     |
| 1  | 116408574 | G | C | rs10923675                        | 2.34E-05 | 0.520 | 0.420 | 1.50 | 1.27 | -1.76 | 8.00E-01 | 0.478 | 0.491 | 0.95 | 0.79 | -1.14 | 1.24 | 2.12E-03 | NHLH2(dist=24827), LOC101928995(dist=53423)       | intergenic     |
| 14 | 63281652  | G | C | rs1490025                         | 1.15E-05 | 0.373 | 0.460 | 1.44 | 1.21 | -1.7  | 6.64E-01 | 0.466 | 0.454 | 0.96 | 0.79 | -1.15 | 1.24 | 2.12E-03 | KCNH5                                             | intronic       |
| 2  | 234603439 | A | C | rs397699435;rs6761246             | 4.83E-01 | 0.273 | 0.283 | 1.05 | 0.87 | -1.26 | 5.59E-05 | 0.192 | 0.276 | 1.61 | 1.27 | -2.03 | 1.25 | 2.12E-03 | UGT1A10, UGT1A6, UGT1A7, UGT1A8, UGT1A9           | intronic       |
| 18 | 59576758  | A | G | rs80147226                        | 5.74E-01 | 0.121 | 0.119 | 1.01 | 0.79 | -1.3  | 1.86E-05 | 0.172 | 0.109 | 1.70 | 1.32 | -2.18 | 1.39 | 2.13E-03 | RNF152(dist=16454), PIGN(dist=134700)             | intergenic     |
| 17 | 63881368  | T | C | rs8072692                         | 4.23E-01 | 0.072 | 0.068 | 1.07 | 0.78 | -1.46 | 3.61E-05 | 0.099 | 0.057 | 1.82 | 1.32 | -2.5  | 1.55 | 2.13E-03 | CEP112                                            | intronic       |
| 15 | 75051619  | C | A | rs8038819                         | 4.78E-01 | 0.052 | 0.048 | 1.08 | 0.75 | -1.57 | 5.22E-05 | 0.076 | 0.041 | 1.93 | 1.34 | -2.77 | 1.74 | 2.13E-03 | CYP1A2(dist=2678), CSK(dist=22806)                | intergenic     |
| 14 | 99845262  | G | A | rs2748818                         | 1.47E-05 | 0.125 | 0.188 | 1.63 | 1.28 | -2.07 | 8.36E-01 | 0.178 | 0.173 | 0.97 | 0.76 | -1.24 | 1.30 | 2.13E-03 | BCL11B(dist=107212), SETD3(dist=18821)            | intergenic     |
| 1  | 161914752 | G | A | rs56041058                        | 1.21E-05 | 0.089 | 0.044 | 2.14 | 1.57 | -2.91 | 9.84E-01 | 0.067 | 0.072 | 0.93 | 0.64 | -1.35 | 1.56 | 2.15E-03 | ATF6                                              | intergenic     |
| 9  | 27745717  | T | C | rs16807                           | 3.38E-01 | 0.059 | 0.052 | 1.15 | 0.81 | -1.64 | 1.23E-06 | 0.070 | 0.040 | 1.80 | 1.23 | -2.62 | 1.74 | 2.15E-03 | C9orf72(dist=171853), LINGO2(dist=202367)         | intergenic     |
| 5  | 100617245 | T | C | rs4415055                         | 6.04E-05 | 0.167 | 0.241 | 0.63 | 0.51 | -0.78 | 8.55E-01 | 0.206 | 0.202 | 1.02 | 0.81 | -1.29 | 0.78 | 2.16E-03 | ST8SIA4(dist=378256), SLC04C1(dist=952447)        | intergenic     |
| 15 | 83389209  | T | C | rs57154772                        | 6.48E-01 | 0.336 | 0.337 | 0.99 | 0.84 | -1.18 | 1.74E-05 | 0.405 | 0.309 | 1.53 | 1.26 | -1.85 | 1.23 | 2.18E-03 | LOC338963(dist=6464), ACTG1P17(dist=5441)         | intergenic     |
| 16 | 77572314  | A | G | rs73629160                        | 8.39E-01 | 0.032 | 0.031 | 1.02 | 0.64 | -1.63 | 6.35E-06 | 0.064 | 0.029 | 2.31 | 1.55 | -3.43 | 1.82 | 2.19E-03 | ADAMTS18(dist=103303), NUDT7(dist=184075)         | intergenic     |
| 4  | 16903492  | G | A | rs13327954                        | 3.37E-05 | 0.340 | 0.272 | 1.38 | 1.16 | -1.64 | 7.79E-01 | 0.265 | 0.262 | 1.02 | 0.82 | -1.26 | 1.26 | 2.20E-03 | LDB2(dist=3060), LOC101929123(dist=269888)        | intergenic     |
| 4  | 147394565 | A | G | rs71640637;rs3914627              | 6.31E-01 | 0.208 | 0.199 | 0.94 | 0.77 | -1.16 | 2.62E-05 | 0.267 | 0.198 | 0.68 | 0.55 | -0.84 | 0.77 | 2.21E-03 | SLC10A7                                           | intronic       |
| 13 | 107921395 | C | G | rs115024531                       | 5.08E-01 | 0.034 | 0.030 | 1.13 | 0.72 | -1.79 | 2.43E-06 | 0.054 | 0.028 | 1.99 | 1.3  | -3.05 | 2.05 | 2.21E-03 | FAM155A                                           | intronic       |
| 14 | 21240598  | T | C | rs386775339;rs386775340;rs6571401 | 5.30E-05 | 0.314 | 0.251 | 1.37 | 1.14 | -1.63 | 9.30E-01 | 0.227 | 0.220 | 1.04 | 0.83 | -1.3  | 1.28 | 2.22E-03 | EDDM3B(dist=1491), RNASE6(dist=8612)              | intergenic     |
| 18 | 59574444  | C | T | rs75971451                        | 4.83E-01 | 0.120 | 0.117 | 1.03 | 0.8  | -1.32 | 5.12E-05 | 0.168 | 0.107 | 1.68 | 1.3  | -2.16 | 1.39 | 2.23E-03 | RNF152(dist=14140), PIGN(dist=137014)             | intergenic     |
| 6  | 32655916  | C | G | rs189311301                       | 1.34E-06 | 0.040 | 0.021 | 2.00 | 1.28 | -3    |          |       |       |      |      |       |      |          |                                                   |                |

|    |           |   |   |                       |          |       |       |      |      |       |          |       |       |      |      |       |      |          |                                                 |                |
|----|-----------|---|---|-----------------------|----------|-------|-------|------|------|-------|----------|-------|-------|------|------|-------|------|----------|-------------------------------------------------|----------------|
| 7  | 52986096  | T | C | rs80348505            | 6.41E-05 | 0.050 | 0.029 | 1.79 | 1.2  | -2.66 | 9.08E-01 | 0.029 | 0.028 | 1.04 | 0.6  | -1.82 | 1.95 | 2.29E-03 | COBL(dist=1601581), POM121L12(dist=117253)      | intergenic     |
| 5  | 7231844   | C | T | rs4374728             | 5.90E-05 | 0.366 | 0.304 | 0.75 | 0.64 | -0.89 | 8.88E-01 | 0.320 | 0.317 | 0.98 | 0.81 | -1.2  | 0.77 | 2.30E-03 | MIR4278(dist=403810), MIR4454(dist=37572)       | intergenic     |
| 14 | 21240583  | G | C | rs6571399             | 6.14E-05 | 0.332 | 0.267 | 1.37 | 1.15 | -1.63 | 9.57E-01 | 0.241 | 0.233 | 1.05 | 0.84 | -1.3  | 1.26 | 2.30E-03 | EDDM3B(dist=1476), RNASE6(dist=8627)            | intergenic     |
| 15 | 83364938  | G | T | rs55870914            | 7.70E-01 | 0.243 | 0.255 | 0.94 | 0.78 | -1.14 | 2.54E-07 | 0.342 | 0.237 | 1.67 | 1.37 | -2.04 | 1.26 | 2.31E-03 | AP3B2                                           | intronic       |
| 7  | 22023178  | T | C | rs150676892           | 5.63E-01 | 0.048 | 0.044 | 1.10 | 0.74 | -1.61 | 2.15E-06 | 0.069 | 0.034 | 2.11 | 1.44 | -3.09 | 1.72 | 2.32E-03 | CDC47L(dist=37636), RAPGEF5(dist=134730)        | intergenic     |
| 16 | 80803990  | T | C | rs13331075            | 7.78E-01 | 0.105 | 0.102 | 1.04 | 0.8  | -1.36 | 1.81E-06 | 0.147 | 0.093 | 1.68 | 1.28 | -2.19 | 1.46 | 2.33E-03 | CDYL2                                           | intronic       |
| 11 | 117463255 | C | G | rs115349805           | 8.74E-01 | 0.051 | 0.052 | 0.98 | 0.68 | -1.42 | 8.08E-07 | 0.083 | 0.041 | 2.13 | 1.5  | -3.02 | 1.62 | 2.33E-03 | DSCAML1                                         | intronic       |
| 7  | 41143668  | T | C | rs73690454            | 3.42E-01 | 0.045 | 0.136 | 1.08 | 0.85 | -1.36 | 4.10E-05 | 0.162 | 0.108 | 1.60 | 1.24 | -2.07 | 1.38 | 2.33E-03 | LINC01449                                       | ncRNA_intronic |
| 15 | 83393539  | G | A | rs57868794            | 6.83E-01 | 0.325 | 0.328 | 0.99 | 0.83 | -1.17 | 1.37E-05 | 0.397 | 0.301 | 1.52 | 1.26 | -1.85 | 1.24 | 2.33E-03 | LOC338963(dist=10794), ACTG1P17(dist=1111)      | intergenic     |
| 7  | 21999100  | A | G | rs28622492            | 6.57E-01 | 0.070 | 0.067 | 1.04 | 0.75 | -1.43 | 1.09E-06 | 0.089 | 0.046 | 2.02 | 1.44 | -2.84 | 1.60 | 2.34E-03 | CDC47L(dist=13558), RAPGEF5(dist=158808)        | intergenic     |
| 14 | 63279958  | G | A | rs12589217            | 1.08E-05 | 0.376 | 0.465 | 1.44 | 1.22 | -1.71 | 6.05E-01 | 0.473 | 0.460 | 0.95 | 0.79 | -1.15 | 1.23 | 2.34E-03 | KCNH5                                           | intronic       |
| 1  | 154473660 | T | C | rs6700296             | 5.19E-05 | 0.271 | 0.192 | 1.57 | 1.3  | -1.89 | 8.50E-01 | 0.230 | 0.236 | 0.97 | 0.78 | -1.21 | 1.28 | 2.34E-03 | SHE                                             | intronic       |
| 6  | 52364224  | A | G | rs77281913            | 5.16E-01 | 0.034 | 0.030 | 1.13 | 0.72 | -1.78 | 4.38E-05 | 0.063 | 0.031 | 2.09 | 1.41 | -3.11 | 1.90 | 2.35E-03 | TRAM2(NM_012288:c.*3771T>C)                     | UTR3           |
| 13 | 97632065  | G | T | rs76798117            | 6.30E-01 | 0.035 | 0.034 | 1.03 | 0.66 | -1.6  | 1.21E-05 | 0.061 | 0.028 | 2.25 | 1.5  | -3.37 | 1.81 | 2.35E-03 | LINC00359                                       | ncRNA_intronic |
| 12 | 118064719 | G | A | rs6490137             | 6.36E-01 | 0.042 | 0.037 | 0.88 | 0.58 | -1.32 | 1.16E-05 | 0.073 | 0.046 | 0.61 | 0.42 | -0.88 | 0.54 | 2.35E-03 | KSR2                                            | intronic       |
| 15 | 51675965  | T | G | rs146612439           | 4.99E-01 | 0.047 | 0.045 | 1.05 | 0.71 | -1.54 | 5.16E-06 | 0.054 | 0.028 | 2.01 | 1.31 | -3.08 | 1.96 | 2.35E-03 | GLDN                                            | intronic       |
| 15 | 89263171  | C | G | rs8036441             | 6.00E-01 | 0.093 | 0.090 | 1.04 | 0.78 | -1.37 | 2.02E-05 | 0.123 | 0.072 | 1.80 | 1.34 | -2.4  | 1.48 | 2.36E-03 | ISG20(dist=63596), ACAN(dist=83503)             | intergenic     |
| 3  | 195006372 | G | C | rs76861098            | 8.69E-06 | 0.052 | 0.029 | 1.84 | 1.24 | -2.71 | 5.46E-01 | 0.025 | 0.027 | 0.94 | 0.52 | -1.7  | 2.07 | 2.37E-03 | ACAP2                                           | intronic       |
| 10 | 18586658  | G | A | rs78861821            | 5.11E-05 | 0.049 | 0.026 | 1.95 | 1.3  | -2.93 | 9.39E-01 | 0.028 | 0.027 | 1.01 | 0.57 | -1.79 | 1.96 | 2.37E-03 | CACNB2                                          | intronic       |
| 4  | 168172993 | G | A | rs73861956            | 6.42E-01 | 0.060 | 0.057 | 1.07 | 0.76 | -1.51 | 1.41E-05 | 0.092 | 0.056 | 1.70 | 1.22 | -2.37 | 1.60 | 2.38E-03 | SPOCK3(dist=17252), ANXA10(dist=840695)         | intergenic     |
| 3  | 195007092 | G | C | rs115920436           | 8.85E-06 | 0.052 | 0.029 | 1.83 | 1.24 | -2.71 | 5.47E-01 | 0.025 | 0.027 | 0.94 | 0.52 | -1.7  | 2.07 | 2.38E-03 | ACAP2                                           | intronic       |
| 8  | 140108957 | A | G | rs184652039           | 2.61E-01 | 0.030 | 0.026 | 1.18 | 0.73 | -1.91 | 1.86E-05 | 0.039 | 0.021 | 1.90 | 1.16 | -3.12 | 2.33 | 2.38E-03 | COL22A1(dist=182708), NONE(dist=NONE)           | intergenic     |
| 9  | 91338628  | C | T | rs6559344             | 6.95E-01 | 0.177 | 0.162 | 0.90 | 0.73 | -1.12 | 2.95E-06 | 0.249 | 0.186 | 0.69 | 0.55 | -0.86 | 0.76 | 2.39E-03 | LOC286238(dist=71553), MIR4289(dist=22123)      | intergenic     |
| 4  | 79296137  | G | A | rs4975076             | 7.62E-01 | 0.063 | 0.053 | 0.83 | 0.59 | -1.16 | 1.23E-05 | 0.101 | 0.066 | 0.63 | 0.46 | -0.86 | 0.63 | 2.39E-03 | FRAS1                                           | intronic       |
| 15 | 62103512  | T | C | rs73426768            | 1.94E-05 | 0.052 | 0.026 | 2.03 | 1.36 | -3.02 | 4.52E-01 | 0.024 | 0.028 | 0.87 | 0.48 | -1.6  | 1.95 | 2.39E-03 | RORA(dist=582010), VPS13C(dist=41078)           | intergenic     |
| 10 | 97338549  | C | T | rs6584010             | 2.92E-05 | 0.231 | 0.171 | 1.45 | 1.19 | -1.77 | 8.68E-01 | 0.168 | 0.167 | 1.01 | 0.79 | -1.29 | 1.30 | 2.40E-03 | SORBS1(dist=17372), ALDH18A1(dist=27137)        | intergenic     |
| 10 | 56302374  | C | T | rs11004362            | 1.85E-05 | 0.050 | 0.097 | 0.49 | 0.34 | -0.7  | 8.93E-01 | 0.104 | 0.103 | 1.02 | 0.75 | -1.38 | 0.70 | 2.40E-03 | PCDH15                                          | intronic       |
| 4  | 147401947 | G | A | rs4835314             | 5.81E-01 | 0.202 | 0.191 | 0.94 | 0.76 | -1.15 | 4.85E-05 | 0.256 | 0.188 | 0.67 | 0.54 | -0.83 | 0.78 | 2.41E-03 | SLC10A7                                         | intronic       |
| 4  | 147406196 | T | C | rs10032453            | 5.85E-01 | 0.201 | 0.191 | 0.94 | 0.77 | -1.15 | 4.98E-05 | 0.256 | 0.187 | 0.67 | 0.54 | -0.83 | 0.78 | 2.42E-03 | SLC10A7                                         | intronic       |
| 6  | 31492295  | C | T | rs3093989             | 6.11E-05 | 0.165 | 0.226 | 1.48 | 1.19 | -1.83 | 8.35E-01 | 0.219 | 0.228 | 1.05 | 0.84 | -1.32 | 1.29 | 2.42E-03 | MICB(dist=13394), MCCD1(dist=4444)              | intergenic     |
| 1  | 152182168 | C | T | rs1390485             | 6.01E-05 | 0.275 | 0.211 | 1.42 | 1.18 | -1.71 | 9.88E-01 | 0.222 | 0.218 | 1.02 | 0.81 | -1.28 | 1.27 | 2.43E-03 | RPTN(dist=50464), HRNR(dist=2384)               | intergenic     |
| 3  | 76504427  | G | A | rs9826755             | 5.15E-01 | 0.410 | 0.395 | 1.07 | 0.91 | -1.26 | 5.06E-05 | 0.469 | 0.380 | 1.44 | 1.2  | -1.74 | 1.22 | 2.43E-03 | ZNF717(dist=669693), ROBO2(dist=584867)         | intergenic     |
| 10 | 97361460  | C | T | rs11188389            | 3.28E-05 | 0.210 | 0.154 | 1.47 | 1.2  | -1.8  | 8.27E-01 | 0.143 | 0.143 | 1.00 | 0.77 | -1.31 | 1.33 | 2.43E-03 | SORBS1(dist=40283), ALDH18A1(dist=4226)         | intergenic     |
| 17 | 16838265  | G | A | rs114347756           | 1.31E-05 | 0.058 | 0.032 | 1.86 | 1.28 | -2.69 | 8.01E-01 | 0.039 | 0.040 | 0.97 | 0.6  | -1.57 | 1.88 | 2.43E-03 | KRT16P2(dist=102118), TNFRSF13B(dist=4133)      | intergenic     |
| 10 | 97355065  | A | C | rs7914886             | 2.63E-05 | 0.224 | 0.165 | 1.46 | 1.2  | -1.79 | 8.40E-01 | 0.162 | 0.162 | 1.00 | 0.78 | -1.29 | 1.31 | 2.44E-03 | SORBS1(dist=33888), ALDH18A1(dist=10621)        | intergenic     |
| 1  | 16296953  | C | G | rs113503883           | 3.09E-05 | 0.086 | 0.048 | 1.85 | 1.36 | -2.53 | 8.78E-01 | 0.068 | 0.067 | 1.02 | 0.7  | -1.47 | 1.55 | 2.45E-03 | ZBTB17                                          | intronic       |
| 13 | 107914307 | T | A | rs144855765           | 6.99E-01 | 0.029 | 0.027 | 1.09 | 0.67 | -1.76 | 8.64E-07 | 0.053 | 0.026 | 2.11 | 1.37 | -3.24 | 2.09 | 2.45E-03 | FAM155A                                         | intronic       |
| 13 | 97630173  | G | A | rs2183691             | 4.66E-01 | 0.035 | 0.034 | 1.02 | 0.66 | -1.59 | 1.22E-05 | 0.061 | 0.028 | 2.25 | 1.5  | -3.37 | 1.81 | 2.46E-03 | LINC00359                                       | ncRNA_intronic |
| 4  | 147409652 | A | G | rs9995307             | 6.69E-01 | 0.206 | 0.198 | 0.95 | 0.78 | -1.17 | 2.97E-05 | 0.268 | 0.196 | 0.67 | 0.54 | -0.82 | 0.78 | 2.46E-03 | SLC10A7                                         | intronic       |
| 10 | 97354795  | C | T | rs7914594             | 2.67E-05 | 0.224 | 0.165 | 1.46 | 1.2  | -1.79 | 8.37E-01 | 0.162 | 0.162 | 1.00 | 0.78 | -1.29 | 1.31 | 2.47E-03 | SORBS1(dist=33618), ALDH18A1(dist=10891)        | intergenic     |
| 15 | 83361080  | C | A | rs17158366            | 7.60E-01 | 0.244 | 0.256 | 0.94 | 0.78 | -1.13 | 2.79E-07 | 0.342 | 0.237 | 1.67 | 1.37 | -2.04 | 1.25 | 2.47E-03 | CPEB1-AS1                                       | ncRNA_exonic   |
| 15 | 87358509  | T | C | rs75986686            | 9.59E-06 | 0.050 | 0.026 | 2.00 | 1.33 | -2.99 | 7.88E-01 | 0.028 | 0.030 | 0.94 | 0.53 | -1.66 | 2.00 | 2.47E-03 | AGBL1                                           | intronic       |
| 12 | 106590737 | T | G | rs1427788             | 7.78E-01 | 0.416 | 0.427 | 0.95 | 0.81 | -1.13 | 1.48E-05 | 0.334 | 0.431 | 0.66 | 0.54 | -0.81 | 0.82 | 2.47E-03 | NUAK1(dist=56926), CKAP4(dist=40922)            | intergenic     |
| 20 | 61966695  | A | T | rs149718975;rs9679946 | 6.58E-01 | 0.092 | 0.091 | 1.02 | 0.77 | -1.35 | 1.23E-05 | 0.121 | 0.076 | 1.68 | 1.25 | -2.25 | 1.53 | 2.49E-03 | COL20A1(dist=4410), CHRNA4(dist=7967)           | intergenic     |
| 12 | 118085430 | T | C | rs4767593;rs386766779 | 5.51E-01 | 0.050 | 0.044 | 0.88 | 0.6  | -1.29 | 2.67E-05 | 0.079 | 0.051 | 0.62 | 0.44 | -0.89 | 0.57 | 2.49E-03 | KSR2                                            | intronic       |
| 1  | 16310352  | T | A | rs848314              | 3.90E-05 | 0.086 | 0.049 | 1.84 | 1.35 | -2.5  | 8.44E-01 | 0.068 | 0.066 | 1.02 | 0.71 | -1.49 | 1.55 | 2.50E-03 | ZBTB17(dist=7725), C1orf64(dist=20379)          | intergenic     |
| 1  | 16310288  | G | A | rs698894              | 3.91E-05 | 0.086 | 0.049 | 1.84 | 1.35 | -2.5  | 8.43E-01 | 0.068 | 0.066 | 1.02 | 0.71 | -1.49 | 1.55 | 2.50E-03 | ZBTB17(dist=7661), C1orf64(dist=20443)          | intergenic     |
| 14 | 101898171 | C | T | rs11626687            | 8.35E-01 | 0.220 | 0.209 | 0.94 | 0.77 | -1.14 | 5.26E-07 | 0.297 | 0.228 | 0.70 | 0.57 | -0.86 | 0.77 | 2.50E-03 | LINC00524(dist=23912), DIO3OS(dist=120389)      | intergenic     |
| 1  | 16309117  | A | C | rs848311              | 3.96E-05 | 0.086 | 0.049 | 1.84 | 1.35 | -2.5  | 8.42E-01 | 0.068 | 0.066 | 1.02 | 0.71 | -1.49 | 1.55 | 2.51E-03 | ZBTB17(dist=6490), C1orf64(dist=21614)          | intergenic     |
| 14 | 99844494  | T | C | rs2748821             | 7.72E-06 | 0.125 | 0.185 | 1.60 | 1.26 | -2.03 | 8.40E-01 | 0.176 | 0.171 | 0.97 | 0.76 | -1.24 | 1.31 | 2.52E-03 | BCL11B(dist=106444), SETD3(dist=19589)          | intergenic     |
| 4  | 68495581  | C | A | rs17088544            | 5.14E-05 | 0.078 | 0.045 | 1.80 | 1.31 | -2.49 | 8.64E-01 | 0.047 | 0.045 | 1.04 | 0.67 | -1.62 | 1.59 | 2.52E-03 | UBA6                                            | intronic       |
| 7  | 41223109  | C | T | rs75086505            | 3.90E-01 | 0.152 | 0.139 | 1.11 | 0.88 | -1.39 | 6.42E-05 | 0.186 | 0.131 | 1.52 | 1.19 | -1.94 | 1.35 | 2.53E-03 | LINC01449(dist=50010), INHBA(dist=505492)       | intergenic     |
| 10 | 97349766  | C | G | rs7915912             | 2.67E-05 | 0.224 | 0.165 | 1.46 | 1.2  | -1.79 | 8.31E-01 | 0.162 | 0.162 | 1.00 | 0.78 | -1.29 | 1.31 | 2.53E-03 | SORBS1(dist=28589), ALDH18A1(dist=15920)        | intergenic     |
| 3  | 197588283 | C | T | rs116680248           | 2.23E-05 | 0.091 | 0.053 | 1.78 | 1.32 | -2.4  | 6.25E-01 | 0.047 | 0.050 | 0.94 | 0.61 | -1.46 | 1.55 | 2.54E-03 | LRCH3                                           | intronic       |
| 10 | 50450730  | G | A | rs11101057            | 3.67E-05 | 0.154 | 0.091 | 1.82 | 1.43 | -2.3  | 8.72E-01 | 0.156 | 0.160 | 0.96 | 0.75 | -1.25 | 1.39 | 2.54E-03 | C10orf128(dist=54285), C10orf71-AS1(dist=53598) | intergenic     |
| 10 | 97333234  | T | C | rs7912555             | 1.95E-05 | 0.234 | 0.173 | 1.46 | 1.2  | -1.78 | 7.80E-01 | 0.167 | 0.168 | 0.99 | 0.77 | -1.28 | 1.30 | 2.55E-03 | SORBS1(dist=12057), ALDH18A1(dist=32452)        | intergenic     |
| 3  | 133470025 | A | G | rs8177203             | 5.63E-01 | 0.081 | 0.074 | 1.11 | 0.82 | -1.5  | 4.39E-05 | 0.106 | 0.064 | 1.75 | 1.28 | -2.38 | 1.53 | 2.55E-03 |                                                 |                |



|    |           |   |   |                         |          |       |       |      |      |       |          |       |       |      |      |       |      |          |                                                  |                |
|----|-----------|---|---|-------------------------|----------|-------|-------|------|------|-------|----------|-------|-------|------|------|-------|------|----------|--------------------------------------------------|----------------|
| 10 | 42607697  | A | G | rs386743106;rs10899777  | 4.12E-05 | 0.197 | 0.140 | 0.66 | 0.54 | -0.82 | 8.73E-01 | 0.192 | 0.191 | 0.99 | 0.78 | -1.26 | 0.73 | 2.63E-03 | NONE(dist=NONE), LOC441666(dist=219617)          | intergenic     |
| 6  | 43679005  | T | G | rs73412793              | 2.37E-06 | 0.093 | 0.056 | 1.72 | 1.28 | -2.31 | 4.90E-01 | 0.041 | 0.045 | 0.91 | 0.57 | -1.45 | 1.67 | 2.65E-03 | MRPS18A(dist=23456), VEGFA(dist=58941)           | intergenic     |
| 6  | 14767040  | T | A | rs9476656               | 5.02E-05 | 0.404 | 0.461 | 1.26 | 1.07 | -1.49 | 9.25E-01 | 0.513 | 0.492 | 1.09 | 0.9  | -1.31 | 1.24 | 2.66E-03 | LINC01108(dist=481355), JARID2(dist=479166)      | intergenic     |
| 21 | 36554729  | T | C | rs73376389              | 6.02E-01 | 0.041 | 0.038 | 1.07 | 0.71 | -1.61 | 2.62E-05 | 0.063 | 0.029 | 2.20 | 1.47 | -3.28 | 1.72 | 2.67E-03 | RUNX1(dist=133134), LOC100506403(dist=190076)    | intergenic     |
| 7  | 143205171 | T | C | rs10237688              | 4.22E-06 | 0.106 | 0.173 | 0.56 | 0.44 | -0.73 | 3.24E-01 | 0.159 | 0.141 | 1.15 | 0.89 | -1.48 | 0.76 | 2.68E-03 | EPHA1-AS1                                        | ncRNA_intronic |
| 17 | 52139839  | T | C | rs114641090             | 4.70E-05 | 0.056 | 0.029 | 1.96 | 1.33 | -2.87 | 7.87E-01 | 0.030 | 0.030 | 0.98 | 0.57 | -1.7  | 1.77 | 2.68E-03 | KIF2B(dist=237266), TOM1L1(dist=838213)          | intergenic     |
| 13 | 91416679  | T | C | rs9523067               | 2.67E-05 | 0.210 | 0.152 | 1.49 | 1.21 | -1.82 | 7.40E-01 | 0.170 | 0.178 | 0.95 | 0.74 | -1.21 | 1.34 | 2.69E-03 | LINC01049(dist=229084), LINC00410(dist=126529)   | intergenic     |
| 14 | 63601933  | T | G | rs75189336              | 5.42E-01 | 0.132 | 0.129 | 1.03 | 0.81 | -1.31 | 5.65E-05 | 0.186 | 0.124 | 1.60 | 1.26 | -2.05 | 1.36 | 2.69E-03 | KCNH5(dist=89977), RHOJ(dist=69169)              | intergenic     |
| 12 | 11543432  | G | A | rs12824155              | 2.06E-05 | 0.090 | 0.056 | 1.67 | 1.24 | -2.25 | 7.56E-01 | 0.057 | 0.061 | 0.93 | 0.62 | -1.39 | 1.67 | 2.69E-03 | PRB1(dist=34908), PRB2(dist=1042)                | intergenic     |
| 19 | 5537167   | G | A | rs112226626             | 1.65E-05 | 0.081 | 0.041 | 2.06 | 1.49 | -2.84 | 7.53E-01 | 0.064 | 0.072 | 0.88 | 0.6  | -1.29 | 1.59 | 2.69E-03 | ZNRF4(dist=80300), TINCR(dist=21011)             | intergenic     |
| 9  | 2292279   | G | C | rs7850693               | 6.28E-05 | 0.415 | 0.491 | 1.36 | 1.15 | -1.6  | 8.56E-01 | 0.467 | 0.462 | 1.02 | 0.85 | -1.23 | 1.23 | 2.71E-03 | SMARCA2(dist=98656), VLDLR-AS1(dist=243376)      | intergenic     |
| 5  | 143672364 | A | G | rs73312764              | 4.18E-05 | 0.049 | 0.026 | 1.96 | 1.3  | -2.94 | 5.93E-01 | 0.019 | 0.021 | 0.90 | 0.46 | -1.78 | 2.03 | 2.71E-03 | KCTD16                                           | intronic       |
| 15 | 83363887  | C | T | rs57578325              | 7.94E-01 | 0.248 | 0.259 | 0.94 | 0.78 | -1.14 | 4.75E-07 | 0.342 | 0.240 | 1.65 | 1.35 | -2.02 | 1.25 | 2.71E-03 | ACTB2                                            | intronic       |
| 15 | 89247861  | A | G | rs56221687              | 6.38E-01 | 0.095 | 0.092 | 1.03 | 0.78 | -1.36 | 1.95E-05 | 0.125 | 0.073 | 1.81 | 1.36 | -2.42 | 1.46 | 2.74E-03 | ISG20(dist=48286), ACAN(dist=98813)              | intergenic     |
| 11 | 22599737  | T | C | rs7951481               | 7.12E-01 | 0.034 | 0.034 | 1.01 | 0.65 | -1.59 | 2.56E-05 | 0.060 | 0.026 | 2.37 | 1.57 | -3.56 | 1.78 | 2.74E-03 | LINC01495(dist=86172), FANCF(dist=44342)         | intergenic     |
| 13 | 97634392  | T | C | rs74110715              | 6.73E-01 | 0.035 | 0.034 | 1.02 | 0.65 | -1.59 | 1.19E-05 | 0.061 | 0.028 | 2.28 | 1.52 | -3.42 | 1.78 | 2.76E-03 | LINC00359                                        | ncRNA_intronic |
| 9  | 5266028   | G | C | rs116012844             | 2.14E-05 | 0.058 | 0.031 | 1.96 | 1.35 | -2.85 | 7.99E-01 | 0.034 | 0.033 | 1.02 | 0.6  | -1.71 | 1.77 | 2.76E-03 | INSL4(dist=32061), RLN2(dist=33838)              | intergenic     |
| 9  | 5267367   | G | C | rs144933050             | 3.87E-05 | 0.055 | 0.029 | 1.97 | 1.34 | -2.9  | 7.53E-01 | 0.025 | 0.025 | 1.01 | 0.55 | -1.84 | 1.82 | 2.77E-03 | INSL4(dist=33400), RLN2(dist=32499)              | intergenic     |
| 17 | 52150455  | T | C | rs139624772             | 4.84E-05 | 0.057 | 0.030 | 1.94 | 1.33 | -2.83 | 7.57E-01 | 0.030 | 0.031 | 0.97 | 0.56 | -1.69 | 1.76 | 2.78E-03 | KIF2B(dist=247882), TOM1L1(dist=827597)          | intergenic     |
| 11 | 36752926  | C | T | rs386752517;rs115138646 | 5.44E-01 | 0.112 | 0.103 | 1.09 | 0.84 | -1.41 | 5.57E-05 | 0.137 | 0.087 | 1.68 | 1.28 | -2.22 | 1.39 | 2.79E-03 | C11orf74(dist=72085), LOC103312105(dist=1886888) | intergenic     |
| 9  | 91339179  | T | C | rs2051138               | 7.15E-01 | 0.177 | 0.163 | 0.91 | 0.73 | -1.12 | 3.63E-06 | 0.247 | 0.185 | 0.69 | 0.56 | -0.86 | 0.76 | 2.80E-03 | LOC286238(dist=72104), MIR4289(dist=21572)       | intergenic     |
| 12 | 45848730  | C | T | rs12314621              | 9.12E-06 | 0.564 | 0.475 | 1.43 | 1.21 | -1.68 | 5.20E-01 | 0.506 | 0.485 | 0.92 | 0.76 | -1.11 | 1.23 | 2.81E-03 | ANO6(dist=14543), LINC00938(dist=270773)         | intergenic     |
| 5  | 174499850 | A | G | rs115582052             | 8.73E-01 | 0.028 | 0.029 | 0.97 | 0.59 | -1.59 | 3.17E-05 | 0.067 | 0.037 | 1.88 | 1.28 | -2.75 | 1.96 | 2.81E-03 | FLJ16171(dist=77116), DRD1(dist=367825)          | intergenic     |
| 17 | 66096918  | G | A | rs113050506             | 6.24E-01 | 0.035 | 0.034 | 1.02 | 0.65 | -1.59 | 2.60E-07 | 0.052 | 0.027 | 1.95 | 1.26 | -3.01 | 2.14 | 2.82E-03 | LINC00674                                        | upstream       |
| 12 | 59931518  | C | T | rs59909298              | 5.11E-05 | 0.137 | 0.090 | 1.61 | 1.26 | -2.06 | 8.62E-01 | 0.101 | 0.105 | 0.96 | 0.71 | -1.31 | 1.39 | 2.83E-03 | LRIG3(dist=617199), SLC16A7(dist=58303)          | intergenic     |
| 20 | 59716199  | A | G | rs78057625              | 1.82E-05 | 0.051 | 0.021 | 2.54 | 1.68 | -3.84 | 8.72E-01 | 0.040 | 0.045 | 0.88 | 0.55 | -1.41 | 1.85 | 2.84E-03 | LOC100506470(dist=60964), CDH4(dist=111283)      | intergenic     |
| 2  | 44550290  | A | G | rs2053454               | 7.89E-01 | 0.242 | 0.232 | 0.95 | 0.78 | -1.15 | 1.17E-05 | 0.309 | 0.229 | 0.66 | 0.54 | -0.81 | 0.80 | 2.85E-03 | PREPL                                            | intronic       |
| 9  | 21515213  | G | A | rs73422482              | 3.98E-01 | 0.106 | 0.100 | 1.07 | 0.82 | -1.39 | 4.25E-05 | 0.126 | 0.076 | 1.74 | 1.3  | -2.32 | 1.42 | 2.85E-03 | MIR31HG                                          | ncRNA_intronic |
| 3  | 141463460 | G | C | rs77971862              | 3.03E-01 | 0.027 | 0.022 | 1.23 | 0.73 | -2.06 | 4.80E-05 | 0.042 | 0.023 | 1.88 | 1.16 | -3.04 | 2.25 | 2.85E-03 | RNF7                                             | intronic       |
| 2  | 238520545 | G | C | rs60347413              | 4.20E-01 | 0.103 | 0.102 | 1.07 | 0.82 | -1.39 | 6.31E-05 | 0.172 | 0.124 | 1.47 | 1.14 | -1.89 | 1.41 | 2.85E-03 | RAB17(dist=20776), LRRFIP1(dist=15679)           | intergenic     |
| 2  | 45114291  | G | A | rs6728393               | 3.22E-01 | 0.100 | 0.094 | 1.07 | 0.82 | -1.41 | 2.47E-05 | 0.107 | 0.066 | 1.69 | 1.24 | -2.3  | 1.49 | 2.86E-03 | CAMKMT(dist=114560), SIX3-AS1(dist=53002)        | intergenic     |
| 12 | 106583426 | G | A | rs1148437               | 8.04E-01 | 0.414 | 0.424 | 0.96 | 0.81 | -1.13 | 1.63E-05 | 0.336 | 0.431 | 0.67 | 0.55 | -0.82 | 0.82 | 2.87E-03 | NUAK1(dist=49615), CKAP4(dist=48233)             | intergenic     |
| 10 | 50444375  | C | T | rs11101043              | 5.33E-05 | 0.156 | 0.093 | 1.81 | 1.43 | -2.29 | 9.29E-01 | 0.155 | 0.161 | 0.96 | 0.74 | -1.24 | 1.39 | 2.87E-03 | C10orf128(dist=47930), C10orf71-AS1(dist=59953)  | intergenic     |
| 14 | 63248825  | A | A | rs1884509               | 4.25E-05 | 0.418 | 0.497 | 1.37 | 1.17 | -1.62 | 8.34E-01 | 0.488 | 0.491 | 0.99 | 0.82 | -1.19 | 1.23 | 2.87E-03 | KCNH5                                            | intronic       |
| 16 | 80818913  | C | T | rs76452155              | 7.74E-01 | 0.064 | 0.063 | 1.00 | 0.72 | -1.4  | 8.59E-06 | 0.097 | 0.054 | 1.89 | 1.37 | -2.62 | 1.57 | 2.89E-03 | CDYL2                                            | intronic       |
| 13 | 106424154 | A | G | rs73573190              | 6.32E-01 | 0.077 | 0.076 | 1.02 | 0.75 | -1.38 | 1.80E-05 | 0.116 | 0.072 | 1.70 | 1.26 | -2.29 | 1.57 | 2.89E-03 | LINC00343(dist=10009), LINC00460(dist=604757)    | intergenic     |
| 10 | 97336379  | C | G | rs7085365               | 2.93E-05 | 0.231 | 0.171 | 1.45 | 1.19 | -1.77 | 8.06E-01 | 0.168 | 0.168 | 1.00 | 0.78 | -1.28 | 1.30 | 2.89E-03 | SORBS1(dist=15202), ALDH18A1(dist=29307)         | intergenic     |
| 12 | 78247103  | T | T | rs79268080              | 5.71E-01 | 0.027 | 0.022 | 1.24 | 0.74 | -2.06 | 2.22E-05 | 0.050 | 0.030 | 1.71 | 1.1  | -2.66 | 2.17 | 2.91E-03 | NAV3                                             | intronic       |
| 12 | 59946808  | G | C | rs77388321              | 6.41E-05 | 0.141 | 0.093 | 1.59 | 1.25 | -2.03 | 9.25E-01 | 0.104 | 0.106 | 0.98 | 0.72 | -1.33 | 1.38 | 2.91E-03 | LRIG3(dist=632489), SLC16A7(dist=43013)          | intergenic     |
| 4  | 147399505 | G | A | rs3849037               | 6.28E-01 | 0.209 | 0.200 | 0.95 | 0.77 | -1.16 | 5.07E-05 | 0.272 | 0.202 | 0.68 | 0.55 | -0.84 | 0.78 | 2.91E-03 | SLC10A7                                          | intergenic     |
| 16 | 10995466  | G | C | rs116778555             | 4.08E-01 | 0.038 | 0.036 | 1.05 | 0.69 | -1.61 | 4.82E-05 | 0.053 | 0.031 | 1.76 | 1.15 | -2.69 | 2.10 | 2.92E-03 | CIITA                                            | intronic       |
| 11 | 117458870 | G | A | rs76264515              | 9.50E-01 | 0.052 | 0.054 | 0.97 | 0.67 | -1.39 | 7.46E-07 | 0.084 | 0.041 | 2.14 | 1.51 | -3.02 | 1.60 | 2.94E-03 | DSCAML1                                          | intronic       |
| 11 | 117456619 | G | A | rs116232693             | 9.42E-01 | 0.053 | 0.055 | 0.97 | 0.67 | -1.39 | 9.02E-07 | 0.085 | 0.042 | 2.13 | 1.51 | -3.01 | 1.59 | 2.94E-03 | DSCAML1                                          | intronic       |
| 13 | 93130107  | T | C | rs114684309             | 1.25E-05 | 0.050 | 0.028 | 1.81 | 1.21 | -2.69 | 7.81E-01 | 0.030 | 0.030 | 1.00 | 0.57 | -1.73 | 2.07 | 2.95E-03 | GPC5                                             | intronic       |
| 9  | 22849512  | G | A | rs116737465             | 3.15E-01 | 0.068 | 0.061 | 1.12 | 0.81 | -1.55 | 4.78E-05 | 0.082 | 0.049 | 1.73 | 1.22 | -2.44 | 1.60 | 2.96E-03 | LINC01239(dist=25300), LOC101929563(dist=651177) | intergenic     |
| 11 | 117459745 | G | A | rs77974426              | 9.53E-01 | 0.052 | 0.054 | 0.97 | 0.67 | -1.39 | 7.21E-07 | 0.084 | 0.041 | 2.14 | 1.51 | -3.03 | 1.60 | 2.97E-03 | DSCAML1                                          | intronic       |
| 10 | 123253088 | C | T | rs12762633              | 3.07E-01 | 0.055 | 0.047 | 1.17 | 0.81 | -1.68 | 2.08E-05 | 0.068 | 0.042 | 1.66 | 1.14 | -2.43 | 1.77 | 2.98E-03 | GFPR2                                            | intronic       |
| 15 | 83281966  | C | T | rs73439163              | 6.57E-01 | 0.232 | 0.247 | 0.92 | 0.76 | -1.12 | 1.77E-07 | 0.327 | 0.221 | 1.71 | 1.4  | -2.09 | 1.25 | 2.98E-03 | CPEB1                                            | intronic       |
| 8  | 6700414   | G | A | rs79730981              | 6.43E-05 | 0.051 | 0.025 | 2.09 | 1.4  | -3.13 | 7.47E-01 | 0.035 | 0.036 | 0.96 | 0.57 | -1.59 | 1.82 | 2.99E-03 | GS1-24F.2                                        | downstream     |
| 3  | 194981434 | G | A | rs116599681             | 7.21E-01 | 0.034 | 0.033 | 1.06 | 0.67 | -1.66 | 7.91E-06 | 0.049 | 0.024 | 2.10 | 1.34 | -3.28 | 2.20 | 3.00E-03 | XXYLT1                                           | intronic       |
| 6  | 32498895  | C | A | rs189371992             | 5.69E-05 | 0.211 | 0.268 | 0.73 | 0.6  | -0.89 | 9.46E-01 | 0.221 | 0.227 | 0.96 | 0.77 | -1.21 | 0.76 | 3.00E-03 | HLA-DRB5                                         | upstream       |
| 9  | 31628249  | G | A | rs75485692              | 6.79E-01 | 0.027 | 0.021 | 1.28 | 0.77 | -2.14 | 7.96E-06 | 0.054 | 0.032 | 1.75 | 1.14 | -2.66 | 2.11 | 3.00E-03 | LINC01242(dist=1219797), ACO1(dist=756352)       | intergenic     |
| 1  | 46365501  | G | A | rs11211220              | 8.41E-01 | 0.165 | 0.160 | 0.96 | 0.77 | -1.2  | 1.47E-05 | 0.237 | 0.173 | 0.67 | 0.54 | -0.84 | 0.75 | 3.01E-03 | MAST2                                            | intronic       |
| 17 | 52158024  | A | G | rs114836198             | 6.22E-05 | 0.057 | 0.031 | 1.92 | 1.32 | -2.8  | 7.58E-01 | 0.030 | 0.031 | 0.97 | 0.56 | -1.69 | 1.74 | 3.02E-03 | KIF2B(dist=255451), TOM1L1(dist=820028)          | intergenic     |
| 7  | 8755630   | T | C | rs1017004               | 1.46E-05 | 0.230 | 0.151 | 0.60 | 0.49 | -0.73 | 3.62E-01 | 0.193 | 0.216 | 1.15 | 0.91 | -1.46 | 0.76 | 3.02E-03 | NXPH1                                            | intronic       |
| 2  | 44548613  | T | C | rs2241871               | 8.32E-01 | 0.242 | 0.234 | 0.95 | 0.79 | -1.15 | 1.09E-05 | 0.313 | 0.231 | 0.66 | 0.54 | -0.81 | 0.80 | 3.04E-03 | PREPL                                            | intronic       |
| 5  | 144349776 | C | A | rs4913017               | 9.35E-01 | 0.041 | 0.033 | 1.26 | 0.83 | -1.91 | 9.21E-   |       |       |      |      |       |      |          |                                                  |                |

|    |           |   |   |                        |          |       |       |      |      |       |          |       |       |      |      |       |      |          |                                                  |                |
|----|-----------|---|---|------------------------|----------|-------|-------|------|------|-------|----------|-------|-------|------|------|-------|------|----------|--------------------------------------------------|----------------|
| 1  | 154451420 | A | G | rs11265622             | 5.33E-05 | 0.276 | 0.195 | 1.57 | 1.3  | -1.89 | 9.65E-01 | 0.230 | 0.239 | 0.96 | 0.77 | -1.19 | 1.27 | 3.16E-03 | SHE                                              | downstream     |
| 18 | 35066814  | A | G | rs9948846              | 2.17E-05 | 0.251 | 0.323 | 1.43 | 1.18 | -1.72 | 7.96E-01 | 0.319 | 0.319 | 1.00 | 0.82 | -1.22 | 1.23 | 3.17E-03 | CELF4                                            | intronic       |
| 12 | 106583931 | A | C | rs1148438              | 8.12E-01 | 0.413 | 0.423 | 0.96 | 0.81 | -1.13 | 1.90E-05 | 0.336 | 0.430 | 0.67 | 0.55 | -0.82 | 0.82 | 3.18E-03 | NUAK1(dist=50120), CKAP4(dist=47728)             | intergenic     |
| 7  | 21999162  | G | A | rs28515511             | 6.94E-01 | 0.070 | 0.069 | 1.03 | 0.75 | -1.42 | 1.69E-06 | 0.089 | 0.047 | 2.00 | 1.42 | -2.8  | 1.57 | 3.18E-03 | CDCA7L(dist=13620), RAPGEF5(dist=158746)         | intergenic     |
| 12 | 106589282 | C | T | rs2556506              | 8.75E-01 | 0.417 | 0.425 | 0.97 | 0.82 | -1.14 | 1.25E-05 | 0.332 | 0.430 | 0.66 | 0.54 | -0.8  | 0.83 | 3.18E-03 | NUAK1(dist=55471), CKAP4(dist=42377)             | intergenic     |
| 3  | 10239109  | T | A | rs78511690             | 2.22E-05 | 0.090 | 0.055 | 1.71 | 1.27 | -2.31 | 4.71E-01 | 0.056 | 0.059 | 0.93 | 0.62 | -1.4  | 1.56 | 3.25E-03 | IRAK2                                            | intronic       |
| 9  | 21513765  | C | T | rs73422479             | 4.15E-01 | 0.104 | 0.099 | 1.06 | 0.81 | -1.39 | 4.94E-05 | 0.125 | 0.076 | 1.74 | 1.3  | -2.32 | 1.41 | 3.27E-03 | MIR31HG                                          | ncRNA_intronic |
| 17 | 52151625  | C | T | rs111293752            | 5.56E-05 | 0.057 | 0.030 | 1.93 | 1.32 | -2.81 | 7.28E-01 | 0.030 | 0.031 | 0.96 | 0.56 | -1.67 | 1.73 | 3.28E-03 | KIF2B(dist=249052), TOM1L1(dist=826427)          | intergenic     |
| 8  | 28599507  | C | T | rs11784837             | 5.35E-01 | 0.040 | 0.034 | 1.22 | 0.8  | -1.85 | 1.55E-05 | 0.067 | 0.041 | 1.69 | 1.15 | -2.48 | 1.86 | 3.30E-03 | EXTL3                                            | intronic       |
| 15 | 83323255  | C | G | rs1864700              | 7.85E-01 | 0.254 | 0.266 | 0.94 | 0.78 | -1.13 | 8.07E-07 | 0.353 | 0.250 | 1.64 | 1.35 | -2    | 1.24 | 3.31E-03 | CPEB1-AS1                                        | ncRNA_intronic |
| 17 | 52144568  | G | A | rs116682099            | 6.38E-05 | 0.057 | 0.031 | 1.91 | 1.31 | -2.79 | 7.53E-01 | 0.030 | 0.031 | 0.97 | 0.56 | -1.68 | 1.74 | 3.31E-03 | KIF2B(dist=241995), TOM1L1(dist=833484)          | intergenic     |
| 5  | 100705517 | A | C | rs17135177             | 4.16E-05 | 0.359 | 0.448 | 0.69 | 0.58 | -0.82 | 9.16E-01 | 0.429 | 0.416 | 1.06 | 0.88 | -1.28 | 0.82 | 3.31E-03 | ST8SIA4(dist=466528), SLCO4C1(dist=864175)       | intergenic     |
| 14 | 63265898  | G | T | rs2065632              | 1.62E-05 | 0.382 | 0.467 | 1.42 | 1.2  | -1.67 | 6.32E-01 | 0.484 | 0.473 | 0.96 | 0.79 | -1.15 | 1.22 | 3.32E-03 | KCNH5                                            | intronic       |
| 9  | 3852115   | C | A | rs7868369              | 3.40E-05 | 0.392 | 0.492 | 1.50 | 1.27 | -1.77 | 5.91E-01 | 0.457 | 0.433 | 0.91 | 0.75 | -1.1  | 1.22 | 3.34E-03 | GLIS3                                            | intronic       |
| 11 | 9895198   | A | G | rs6483781              | 5.97E-01 | 0.062 | 0.060 | 1.04 | 0.74 | -1.46 | 1.61E-05 | 0.074 | 0.036 | 2.14 | 1.48 | -3.09 | 1.59 | 3.34E-03 | LOC101928008                                     | ncRNA_intronic |
| 16 | 80819822  | G | A | rs116052623            | 6.55E-01 | 0.068 | 0.065 | 1.04 | 0.75 | -1.44 | 9.35E-06 | 0.096 | 0.053 | 1.89 | 1.37 | -2.62 | 1.53 | 3.34E-03 | CDYL2                                            | intronic       |
| 16 | 80819936  | G | A | rs8051557              | 6.54E-01 | 0.068 | 0.065 | 1.04 | 0.75 | -1.44 | 9.58E-06 | 0.096 | 0.053 | 1.89 | 1.36 | -2.62 | 1.53 | 3.35E-03 | CDYL2                                            | intronic       |
| 7  | 11916005  | G | A | rs35061200             | 5.65E-01 | 0.052 | 0.046 | 1.13 | 0.78 | -1.64 | 6.30E-05 | 0.094 | 0.056 | 1.75 | 1.26 | -2.42 | 1.57 | 3.36E-03 | THSD7A(dist=44181), TMEM106B(dist=334843)        | intergenic     |
| 18 | 29647986  | A | G | rs13381673             | 6.19E-01 | 0.133 | 0.131 | 1.03 | 0.81 | -1.3  | 4.58E-05 | 0.155 | 0.098 | 1.69 | 1.3  | -2.19 | 1.39 | 3.36E-03 | RNF125                                           | intronic       |
| 16 | 80819961  | A | G | rs8053366              | 6.55E-01 | 0.068 | 0.065 | 1.04 | 0.75 | -1.44 | 9.62E-06 | 0.096 | 0.053 | 1.89 | 1.36 | -2.62 | 1.53 | 3.37E-03 | CDYL2                                            | intronic       |
| 18 | 21892785  | T | C | rs78694281             | 4.52E-01 | 0.063 | 0.059 | 1.07 | 0.77 | -1.5  | 1.66E-06 | 0.074 | 0.039 | 1.94 | 1.34 | -2.8  | 1.63 | 3.37E-03 | OSBPL1A                                          | intronic       |
| 8  | 128931826 | C | T | rs77378682             | 6.47E-05 | 0.054 | 0.030 | 1.89 | 1.29 | -2.77 | 8.65E-01 | 0.038 | 0.038 | 0.99 | 0.61 | -1.61 | 1.77 | 3.39E-03 | PVT1                                             | ncRNA_intronic |
| 2  | 44570776  | C | T | rs17580226             | 7.04E-01 | 0.273 | 0.260 | 0.94 | 0.78 | -1.13 | 2.40E-05 | 0.322 | 0.243 | 0.68 | 0.55 | -0.83 | 0.81 | 3.39E-03 | PREPL                                            | intronic       |
| 20 | 3695819   | G | T | rs8115817              | 1.05E-05 | 0.124 | 0.080 | 1.63 | 1.26 | -2.11 | 4.68E-01 | 0.088 | 0.093 | 0.94 | 0.68 | -1.31 | 1.44 | 3.39E-03 | BPI                                              | intronic       |
| 8  | 138277051 | T | A | rs113447741            | 5.50E-01 | 0.043 | 0.040 | 1.06 | 0.71 | -1.6  | 5.03E-05 | 0.068 | 0.033 | 2.17 | 1.48 | -3.19 | 1.65 | 3.40E-03 | KHDRBS3(dist=1617199), LOC101927915(dist=141293) | intergenic     |
| 2  | 81843362  | A | G | rs145983724;rs11688342 | 3.31E-05 | 0.394 | 0.489 | 0.68 | 0.58 | -0.8  | 7.13E-01 | 0.447 | 0.430 | 1.07 | 0.89 | -1.29 | 0.82 | 3.42E-03 | LOC100507201(dist=149292), LOC1720(dist=1240565) | intergenic     |
| 5  | 173759726 | C | T | rs2936979              | 3.37E-01 | 0.046 | 0.039 | 1.18 | 0.79 | -1.75 | 5.55E-06 | 0.054 | 0.029 | 1.93 | 1.26 | -2.95 | 1.81 | 3.42E-03 | HMP19(dist=223544), LINC01411(dist=3631)         | intergenic     |
| 21 | 40699551  | G | A | rs114502229            | 8.77E-01 | 0.030 | 0.030 | 1.00 | 0.62 | -1.6  | 4.05E-05 | 0.062 | 0.029 | 2.18 | 1.46 | -3.26 | 1.86 | 3.43E-03 | BRWD1-AS1(dist=4407), HMG11(dist=14690)          | intergenic     |
| 6  | 43678364  | C | T | rs73412789             | 2.28E-06 | 0.093 | 0.056 | 1.72 | 1.28 | -2.31 | 4.33E-01 | 0.043 | 0.048 | 0.89 | 0.57 | -1.41 | 1.64 | 3.44E-03 | MRS18A(dist=22815), VEGFA(dist=59582)            | intergenic     |
| 13 | 24380803  | C | T | rs9580758              | 6.10E-05 | 0.266 | 0.210 | 1.37 | 1.13 | -1.65 | 7.39E-01 | 0.207 | 0.205 | 1.01 | 0.81 | -1.27 | 1.29 | 3.45E-03 | MIPEP                                            | intronic       |
| 16 | 80819244  | G | C | rs7186990              | 6.47E-01 | 0.068 | 0.065 | 1.04 | 0.75 | -1.44 | 1.16E-05 | 0.098 | 0.056 | 1.83 | 1.33 | -2.52 | 1.53 | 3.46E-03 | CDYL2                                            | intronic       |
| 1  | 228361848 | G | A | rs138850962            | 8.54E-01 | 0.075 | 0.076 | 0.99 | 0.73 | -1.35 | 1.23E-05 | 0.123 | 0.075 | 1.72 | 1.29 | -2.3  | 1.50 | 3.46E-03 | IBAS7                                            | intronic       |
| 1  | 60055825  | C | T | rs145376407            | 5.71E-01 | 0.054 | 0.051 | 1.07 | 0.74 | -1.54 | 2.51E-05 | 0.075 | 0.040 | 1.98 | 1.38 | -2.85 | 1.61 | 3.46E-03 | FGGY                                             | intronic       |
| 3  | 10227512  | G | A | rs78839573             | 3.79E-05 | 0.091 | 0.057 | 1.65 | 1.23 | -2.22 | 5.92E-01 | 0.061 | 0.063 | 0.96 | 0.65 | -1.42 | 1.55 | 3.47E-03 | IRAK2                                            | intronic       |
| 4  | 2248073   | C | T | rs61789364             | 1.61E-05 | 0.061 | 0.030 | 2.11 | 1.45 | -3.05 | 6.21E-01 | 0.034 | 0.038 | 0.89 | 0.53 | -1.49 | 1.73 | 3.48E-03 | POLL(dist=4182), MXD4(dist=1087)                 | intergenic     |
| 13 | 23316084  | G | A | rs115937239            | 4.21E-01 | 0.062 | 0.057 | 1.08 | 0.77 | -1.53 | 1.11E-05 | 0.071 | 0.037 | 1.96 | 1.35 | -2.85 | 1.64 | 3.49E-03 | LINC00540(dist=465425), BASP1P1(dist=155085)     | intergenic     |
| 13 | 23315944  | C | G | rs74463417             | 4.20E-01 | 0.062 | 0.057 | 1.09 | 0.77 | -1.53 | 1.13E-05 | 0.071 | 0.037 | 1.96 | 1.35 | -2.85 | 1.64 | 3.50E-03 | LINC00540(dist=465285), BASP1P1(dist=155225)     | intergenic     |
| 10 | 97329035  | A | C | rs122575123            | 2.52E-05 | 0.228 | 0.169 | 1.46 | 1.19 | -1.78 | 7.30E-01 | 0.166 | 0.168 | 0.99 | 0.77 | -1.27 | 1.29 | 3.51E-03 | SORBS1(dist=7858), ALDH18A1(dist=36651)          | intergenic     |
| 11 | 17416125  | G | A | rs17846770             | 5.98E-01 | 0.034 | 0.036 | 0.94 | 0.6  | -1.47 | 8.46E-09 | 0.075 | 0.039 | 1.98 | 1.38 | -2.86 | 1.77 | 3.53E-03 | ABCC8                                            | intronic       |
| 2  | 138330890 | G | A | rs76644347             | 8.58E-01 | 0.040 | 0.040 | 0.99 | 0.65 | -1.5  | 2.60E-08 | 0.073 | 0.037 | 2.08 | 1.44 | -3.02 | 1.76 | 3.53E-03 | THSD7B                                           | intronic       |
| 9  | 5261230   | G | T | rs75828030             | 4.52E-05 | 0.056 | 0.029 | 1.98 | 1.35 | -2.9  | 7.04E-01 | 0.025 | 0.026 | 0.98 | 0.54 | -1.78 | 1.77 | 3.53E-03 | INSL4(dist=27263), RLN2(dist=38636)              | intergenic     |
| 16 | 66679630  | C | T | rs11863938             | 4.58E-05 | 0.155 | 0.233 | 0.61 | 0.49 | -0.75 | 7.76E-01 | 0.216 | 0.202 | 1.08 | 0.86 | -1.36 | 0.79 | 3.54E-03 | CMTM4                                            | intronic       |
| 12 | 106587950 | G | C | rs1965                 | 8.50E-01 | 0.416 | 0.425 | 0.96 | 0.82 | -1.14 | 1.85E-05 | 0.338 | 0.434 | 0.67 | 0.55 | -0.81 | 0.83 | 3.54E-03 | NUAK1(dist=54139), CKAP4(dist=43709)             | intergenic     |
| 4  | 2792636   | G | A | rs17608241             | 9.93E-01 | 0.040 | 0.039 | 1.03 | 0.68 | -1.57 | 6.32E-08 | 0.077 | 0.045 | 1.78 | 1.24 | -2.55 | 1.83 | 3.54E-03 | TNIP2(dist=34533), SH3BP2(dist=2114)             | intergenic     |
| 17 | 52137994  | T | C | rs115750033            | 6.14E-05 | 0.057 | 0.031 | 1.91 | 1.31 | -2.78 | 7.26E-01 | 0.030 | 0.031 | 0.96 | 0.56 | -1.66 | 1.73 | 3.56E-03 | KIF2B(dist=235421), TOM1L1(dist=840058)          | intergenic     |
| 10 | 97354958  | T | C | rs7900149              | 3.60E-05 | 0.247 | 0.186 | 1.43 | 1.18 | -1.74 | 7.26E-01 | 0.176 | 0.178 | 0.99 | 0.77 | -1.26 | 1.28 | 3.58E-03 | SORBS1(dist=33781), ALDH18A1(dist=10728)         | intergenic     |
| 15 | 83319622  | G | C | rs7495972              | 7.62E-01 | 0.254 | 0.266 | 0.94 | 0.78 | -1.13 | 8.20E-07 | 0.353 | 0.250 | 1.64 | 1.35 | -2    | 1.24 | 3.58E-03 | CPEB1-AS1                                        | ncRNA_intronic |
| 19 | 43570913  | T | G | rs139918672            | 6.29E-05 | 0.054 | 0.087 | 0.61 | 0.43 | -0.86 | 9.34E-01 | 0.075 | 0.076 | 0.99 | 0.69 | -1.41 | 0.67 | 3.58E-03 | PSG2                                             | intronic       |
| 10 | 97352768  | C | T | rs7081293              | 3.59E-05 | 0.246 | 0.186 | 1.43 | 1.18 | -1.74 | 7.31E-01 | 0.177 | 0.179 | 0.99 | 0.77 | -1.26 | 1.28 | 3.58E-03 | SORBS1(dist=31591), ALDH18A1(dist=12918)         | intergenic     |
| 8  | 138282405 | T | C | rs112379634            | 5.99E-01 | 0.043 | 0.041 | 1.05 | 0.7  | -1.57 | 3.14E-05 | 0.069 | 0.033 | 2.18 | 1.49 | -3.19 | 1.65 | 3.59E-03 | KHDRBS3(dist=1622553), LOC101927915(dist=135939) | intergenic     |
| 10 | 56653432  | C | T | rs113808997            | 4.06E-06 | 0.098 | 0.053 | 1.94 | 1.44 | -2.59 | 3.71E-01 | 0.053 | 0.061 | 0.87 | 0.57 | -1.31 | 1.51 | 3.62E-03 | PCDH15(dist=92381), MTRNR2L5(dist=705318)        | intergenic     |
| 17 | 65056629  | C | T | rs114853368            | 7.39E-01 | 0.036 | 0.035 | 1.01 | 0.65 | -1.57 | 3.94E-06 | 0.056 | 0.028 | 1.98 | 1.36 | -3.17 | 1.97 | 3.64E-03 | CACNG1(dist=3718), HELZ(dist=9925)               | intergenic     |
| 9  | 5259504   | G | A | rs149677677            | 5.25E-05 | 0.056 | 0.029 | 1.97 | 1.34 | -2.88 | 7.21E-01 | 0.026 | 0.026 | 0.99 | 0.55 | -1.77 | 1.76 | 3.67E-03 | INSL4(dist=25537), RLN2(dist=40362)              | intergenic     |
| 2  | 44544955  | G | A | rs7586188              | 6.57E-01 | 0.413 | 0.406 | 0.97 | 0.82 | -1.15 | 5.84E-05 | 0.474 | 0.381 | 0.68 | 0.57 | -0.82 | 0.83 | 3.67E-03 | PREPL                                            | UTR3           |
| 1  | 157577086 | A | G | rs12125930             | 7.24E-01 | 0.265 | 0.254 | 1.06 | 0.88 | -1.27 | 5.43E-05 | 0.332 | 0.255 | 1.45 | 1.19 | -1.77 | 1.24 | 3.68E-03 | FCRL4(dist=9216), FCRL3(dist=70892)              | intergenic     |
| 1  | 60078880  | A | C | rs183461915            | 6.49E-01 | 0.069 | 0.067 | 1.04 | 0.75 | -1.44 | 6.20E-05 | 0.106 | 0.060 | 1.85 | 1.36 | -2.53 | 1.48 | 3.69E-03 | FGGY                                             | intronic       |
| 1  | 60056617  | T | C | rs150216559            | 5.77E-01 | 0.054 | 0.051 | 1.07 | 0.74 | -1.53 | 2.77E-05 | 0.075 | 0.040 | 1.97 | 1.37 | -2.84 | 1.60 | 3.72E-03 | FGGY                                             | intronic       |
| 1  | 60057487  | C | T | rs187559773            | 6.57E-01 |       |       |      |      |       |          |       |       |      |      |       |      |          |                                                  |                |

|    |           |   |    |                       |          |       |       |      |      |       |          |       |       |      |      |       |      |          |                                                      |                |
|----|-----------|---|----|-----------------------|----------|-------|-------|------|------|-------|----------|-------|-------|------|------|-------|------|----------|------------------------------------------------------|----------------|
| 14 | 57323701  | T | C  | rs709962              | 2.74E-07 | 0.049 | 0.022 | 2.35 | 1.55 | -3.55 | 4.62E-01 | 0.026 | 0.035 | 0.74 | 0.41 | -1.32 | 2.10 | 3.81E-03 | OTX2-AS1                                             | ncRNA_intronic |
| 15 | 83282130  | G | T  | rs115330390           | 3.40E-01 | 0.036 | 0.043 | 0.82 | 0.53 | -1.27 | 2.80E-09 | 0.085 | 0.039 | 2.27 | 1.6  | -3.21 | 1.72 | 3.82E-03 | CPEB1                                                | intronic       |
| 1  | 154474875 | G | A  | rs12753666            | 5.25E-05 | 0.281 | 0.203 | 1.53 | 1.27 | -1.85 | 9.75E-01 | 0.237 | 0.246 | 0.95 | 0.76 | -1.18 | 1.72 | 3.82E-03 | DDR10(NM_001098475:c.-4505G>A, NM_182499:c.-4505G>A) | UTR5           |
| 3  | 10227286  | C | T  | rs193114964           | 3.33E-05 | 0.093 | 0.058 | 1.65 | 1.23 | -2.21 | 5.47E-01 | 0.062 | 0.065 | 0.95 | 0.65 | -1.41 | 1.54 | 3.83E-03 | IRAK2                                                | intronic       |
| 15 | 83250767  | G | A  | rs8032281             | 6.40E-01 | 0.235 | 0.250 | 0.92 | 0.76 | -1.12 | 2.87E-07 | 0.330 | 0.227 | 1.68 | 1.38 | -2.06 | 1.25 | 3.83E-03 | CPEB1                                                | intronic       |
| 6  | 70907904  | G | A  | rs79402185            | 7.43E-01 | 0.068 | 0.067 | 1.03 | 0.74 | -1.42 | 1.38E-05 | 0.101 | 0.052 | 2.05 | 1.49 | -2.82 | 1.50 | 3.86E-03 | COL19A1                                              | intronic       |
| 6  | 116572117 | G | A  | rs117189              | 6.74E-01 | 0.300 | 0.297 | 1.01 | 0.85 | -1.21 | 3.04E-05 | 0.368 | 0.276 | 1.53 | 1.26 | -1.86 | 1.24 | 3.87E-03 | TSPYL4(NM_021648:c.*1810C>T)                         | UTR3           |
| 20 | 61960185  | C | T  | rs183941166           | 7.33E-01 | 0.045 | 0.045 | 0.99 | 0.67 | -1.47 | 2.35E-05 | 0.071 | 0.041 | 1.80 | 1.24 | -2.61 | 1.83 | 3.87E-03 | COL20A1                                              | intronic       |
| 18 | 62324596  | G | A  | rs143363976           | 6.10E-01 | 0.028 | 0.031 | 0.90 | 0.55 | -1.47 | 7.96E-10 | 0.057 | 0.024 | 2.43 | 1.6  | -3.7  | 2.00 | 3.87E-03 | LOC284294(dist=233769), CDH7(dist=1092892)           | intergenic     |
| 8  | 138272839 | A | C  | rs73394925            | 5.60E-01 | 0.044 | 0.042 | 1.06 | 0.71 | -1.58 | 3.79E-05 | 0.066 | 0.032 | 2.16 | 1.46 | -3.18 | 1.66 | 3.91E-03 | KHDRBS3(dist=1612987), LOC101927915(dist=145505)     | intergenic     |
| 18 | 6740331   | C | A  | rs73380731            | 4.55E-01 | 0.134 | 0.132 | 1.02 | 0.8  | -1.29 | 3.34E-05 | 0.170 | 0.115 | 1.57 | 1.22 | -2.02 | 1.37 | 3.91E-03 | LINC01387(dist=149679), ARHGAP28(dist=94101)         | intergenic     |
| 5  | 2923812   | T | A  | rs2934515             | 5.77E-01 | 0.168 | 0.166 | 0.99 | 0.79 | -1.23 | 2.87E-05 | 0.194 | 0.134 | 0.64 | 0.51 | -0.82 | 0.75 | 3.92E-03 | C5orf38(dist=168301), LINC01377(dist=254137)         | intergenic     |
| 4  | 163936999 | T | G  | rs11940218            | 4.74E-01 | 0.068 | 0.064 | 1.07 | 0.78 | -1.49 | 5.87E-05 | 0.079 | 0.045 | 1.82 | 1.28 | -2.6  | 1.61 | 3.95E-03 | FSTL5(dist=851813), MIR4454(dist=77727)              | intergenic     |
| 7  | 152945284 | A | G  | rs6948646             | 6.88E-01 | 0.225 | 0.205 | 1.13 | 0.93 | -1.37 | 4.55E-05 | 0.330 | 0.270 | 1.33 | 1.09 | -1.62 | 1.26 | 3.95E-03 | ACTR3B(dist=392820), LINC01287(dist=151720)          | intergenic     |
| 9  | 115100128 | C | T  | rs112128505           | 2.32E-05 | 0.042 | 0.023 | 1.82 | 1.18 | -2.81 | 9.57E-01 | 0.028 | 0.026 | 1.08 | 0.61 | -1.91 | 2.03 | 3.97E-03 | MIR3134                                              | ncRNA_intronic |
| 4  | 89166761  | C | A  | rs7656569             | 8.30E-01 | 0.063 | 0.059 | 1.07 | 0.76 | -1.5  | 3.19E-07 | 0.104 | 0.065 | 1.66 | 1.21 | -2.26 | 1.58 | 3.98E-03 | ABCG2(dist=14287), PPM1K(dist=12000)                 | intergenic     |
| 18 | 6748747   | C | G  | rs73380746            | 4.60E-01 | 0.133 | 0.131 | 1.02 | 0.8  | -1.29 | 3.34E-05 | 0.169 | 0.115 | 1.57 | 1.22 | -2.01 | 1.37 | 3.98E-03 | LINC01387(dist=158095), ARHGAP28(dist=85685)         | intergenic     |
| 7  | 69904878  | T | C  | rs113668033           | 9.27E-01 | 0.027 | 0.029 | 0.90 | 0.55 | -1.49 | 1.60E-05 | 0.079 | 0.041 | 2.00 | 1.4  | -2.85 | 1.77 | 3.98E-03 | AUTS2                                                | intronic       |
| 1  | 157578884 | A | G  | rs11264775            | 7.22E-01 | 0.265 | 0.254 | 1.06 | 0.88 | -1.27 | 6.32E-05 | 0.331 | 0.255 | 1.45 | 1.18 | -1.76 | 1.24 | 3.99E-03 | FCRL4(dist=11014), FCRL3(dist=69094)                 | intergenic     |
| 3  | 53425233  | T | A  | rs72954850            | 5.69E-01 | 0.049 | 0.044 | 1.12 | 0.76 | -1.64 | 4.36E-05 | 0.067 | 0.033 | 2.11 | 1.44 | -3.11 | 1.62 | 4.01E-03 | DCP1A(dist=43579), CACNA1D(dist=103843)              | intergenic     |
| 9  | 5249982   | T | A  | rs141354008           | 5.59E-05 | 0.056 | 0.029 | 1.96 | 1.34 | -2.87 | 7.12E-01 | 0.026 | 0.026 | 0.98 | 0.55 | -1.77 | 1.75 | 4.03E-03 | LINC4(dist=16015), RLN2(dist=49884)                  | intergenic     |
| 8  | 10015672  | C | A  | rs76235194            | 4.32E-01 | 0.081 | 0.074 | 1.10 | 0.82 | -1.49 | 2.69E-05 | 0.097 | 0.057 | 1.79 | 1.3  | -2.47 | 1.49 | 4.03E-03 | MSRA                                                 | intronic       |
| 1  | 60023311  | A | G  | rs74961816            | 7.54E-01 | 0.070 | 0.070 | 1.01 | 0.73 | -1.39 | 3.54E-05 | 0.110 | 0.063 | 1.84 | 1.36 | -2.5  | 1.48 | 4.03E-03 | FGGY                                                 | intronic       |
| 12 | 9006025   | C | T  | rs12814670            | 6.47E-05 | 0.153 | 0.093 | 1.76 | 1.39 | -2.23 | 9.33E-01 | 0.135 | 0.150 | 0.89 | 0.67 | -1.16 | 1.34 | 4.03E-03 | A2ML1(dist=30644), PHC1(dist=7291)                   | intergenic     |
| 12 | 59985764  | T | C  | rs4548660             | 6.12E-05 | 0.142 | 0.096 | 1.57 | 1.23 | -2    | 8.55E-01 | 0.106 | 0.110 | 0.96 | 0.71 | -1.3  | 1.37 | 4.05E-03 | LRI3G(dist=671445), SLC16A7(dist=4057)               | intergenic     |
| 1  | 60077050  | G | C  | rs148995905           | 6.73E-01 | 0.070 | 0.067 | 1.04 | 0.75 | -1.43 | 6.16E-05 | 0.106 | 0.060 | 1.85 | 1.36 | -2.53 | 1.47 | 4.06E-03 | FGGY                                                 | intronic       |
| 12 | 31286189  | T | C  | rs3844571             | 8.78E-01 | 0.167 | 0.173 | 1.04 | 0.84 | -1.29 | 9.00E-06 | 0.256 | 0.179 | 0.63 | 0.51 | -0.79 | 0.75 | 4.06E-03 | DDX11(dist=28464), FAM60A(dist=147331)               | intergenic     |
| 4  | 98203098  | G | A  | rs186741090           | 3.30E-01 | 0.049 | 0.044 | 1.13 | 0.77 | -1.66 | 1.08E-05 | 0.051 | 0.024 | 2.13 | 1.37 | -3.32 | 1.74 | 4.06E-03 | PDHA2(dist=1440473), STPG2-AS1(dist=84979)           | intergenic     |
| 4  | 158544874 | T | C  | rs6853516             | 3.24E-05 | 0.456 | 0.377 | 1.02 | 0.61 | -0.85 | 5.66E-01 | 0.388 | 0.404 | 1.07 | 0.88 | -1.29 | 0.81 | 4.08E-03 | LOC340017(dist=47281), FAM198B(dist=501148)          | intergenic     |
| 1  | 203973970 | T | G  | rs75087543            | 5.17E-01 | 0.093 | 0.089 | 1.05 | 0.8  | -1.4  | 7.65E-06 | 0.104 | 0.063 | 1.73 | 1.26 | -2.36 | 1.50 | 4.13E-03 | SNRPE(dist=133690), LINC00303(dist=27605)            | intergenic     |
| 8  | 1236491   | G | A  | rs11136378            | 5.46E-05 | 0.147 | 0.094 | 1.67 | 1.32 | -2.12 | 7.37E-01 | 0.111 | 0.122 | 0.90 | 0.67 | -1.22 | 1.36 | 4.16E-03 | ERICH1-AS1(dist=148714), LOC286083(dist=7803)        | intergenic     |
| 6  | 32498881  | G | NA |                       | 2.35E-05 | 0.463 | 0.401 | 0.78 | 0.66 | -0.91 | 9.87E-01 | 0.441 | 0.438 | 0.99 | 0.82 | -1.19 | 0.79 | 4.16E-03 | HLA-DQA1(dist=3992), HLA-DQB1(dist=11820)            | intergenic     |
| 8  | 139201813 | T | C  | rs115043332           | 6.25E-01 | 0.066 | 0.063 | 1.03 | 0.74 | -1.44 | 4.29E-05 | 0.102 | 0.056 | 1.90 | 1.39 | -2.61 | 1.49 | 4.17E-03 | FAM135B                                              | intronic       |
| 7  | 89278913  | T | C  | rs76424800            | 4.88E-01 | 0.024 | 0.022 | 1.11 | 0.65 | -1.9  | 2.05E-05 | 0.037 | 0.020 | 1.86 | 1.12 | -3.09 | 2.59 | 4.18E-03 | ZNF804B(dist=312542), STEAP2-AS1(dist=232754)        | intergenic     |
| 11 | 86481736  | C | T  | rs56958665            | 5.58E-01 | 0.136 | 0.133 | 1.03 | 0.81 | -1.3  | 5.80E-05 | 0.156 | 0.106 | 1.56 | 1.2  | -2.03 | 1.42 | 4.20E-03 | ME3(dist=98058), PRSS23(dist=20365)                  | intergenic     |
| 18 | 6736590   | T | A  | rs9951324;rs201540776 | 4.71E-01 | 0.134 | 0.132 | 1.02 | 0.8  | -1.29 | 3.35E-05 | 0.170 | 0.116 | 1.56 | 1.22 | -2.01 | 1.37 | 4.21E-03 | LINC01387(dist=145938), ARHGAP28(dist=97842)         | intergenic     |
| 20 | 8147916   | C | A  | rs6039061             | 5.05E-01 | 0.478 | 0.502 | 0.91 | 0.77 | -1.07 | 5.24E-07 | 0.583 | 0.464 | 1.61 | 1.34 | -1.95 | 1.21 | 4.22E-03 | PLCB1                                                | intronic       |
| 6  | 70874834  | A | G  | rs76431522            | 8.45E-01 | 0.076 | 0.075 | 1.00 | 0.74 | -1.37 | 6.80E-06 | 0.112 | 0.060 | 1.99 | 1.46 | -2.69 | 1.47 | 4.24E-03 | COL19A1                                              | intronic       |
| 12 | 106589658 | G | G  | rs2649712             | 9.00E-01 | 0.417 | 0.425 | 0.97 | 0.82 | -1.14 | 1.99E-05 | 0.338 | 0.434 | 0.67 | 0.55 | -0.81 | 0.83 | 4.26E-03 | NUAK1(dist=55847), CKAP4(dist=42001)                 | intergenic     |
| 3  | 88259247  | T | C  | rs111703775           | 9.90E-01 | 0.040 | 0.042 | 0.96 | 0.63 | -1.45 | 8.43E-06 | 0.068 | 0.031 | 2.27 | 1.55 | -3.34 | 1.71 | 4.27E-03 | C3orf38(dist=52132), EPHA3(dist=897427)              | intergenic     |
| 3  | 88259318  | C | T  | rs113921074           | 9.90E-01 | 0.040 | 0.042 | 0.96 | 0.63 | -1.45 | 8.43E-06 | 0.068 | 0.031 | 2.27 | 1.55 | -3.34 | 1.71 | 4.27E-03 | C3orf38(dist=52203), EPHA3(dist=897356)              | intergenic     |
| 15 | 89227975  | C | T  | rs74030235            | 6.38E-01 | 0.093 | 0.090 | 1.03 | 0.78 | -1.37 | 6.22E-05 | 0.123 | 0.073 | 1.77 | 1.33 | -2.37 | 1.42 | 4.28E-03 | ISG20(dist=28400), ACAN(dist=118699)                 | intergenic     |
| 4  | 2786318   | C | T  | rs13117917            | 6.38E-01 | 0.078 | 0.073 | 1.07 | 0.79 | -1.45 | 1.20E-05 | 0.107 | 0.068 | 1.64 | 1.2  | -2.22 | 1.53 | 4.29E-03 | TNIP2(dist=28215), SH3BP2(dist=8432)                 | intergenic     |
| 8  | 52072007  | C | A  | rs180818706           | 5.90E-01 | 0.086 | 0.085 | 1.02 | 0.76 | -1.36 | 5.27E-05 | 0.124 | 0.078 | 1.67 | 1.25 | -2.23 | 1.46 | 4.32E-03 | SNTG1(dist=365329), PXDNL(dist=160130)               | intergenic     |
| 14 | 63245881  | T | C  | rs12435061            | 3.28E-05 | 0.324 | 0.406 | 1.42 | 1.2  | -1.69 | 5.99E-01 | 0.427 | 0.416 | 0.96 | 0.79 | -1.15 | 1.22 | 4.37E-03 | KCNH5                                                | intronic       |
| 14 | 63245967  | T | C  | rs12435655            | 3.30E-05 | 0.324 | 0.406 | 1.42 | 1.2  | -1.69 | 5.99E-01 | 0.427 | 0.416 | 0.96 | 0.79 | -1.15 | 1.22 | 4.38E-03 | KCNH5                                                | intronic       |
| 13 | 115024529 | G | A  | rs139298640           | 5.33E-05 | 0.071 | 0.039 | 1.87 | 1.33 | -2.62 | 5.77E-01 | 0.032 | 0.035 | 0.91 | 0.54 | -1.55 | 1.62 | 4.38E-03 | CDC16                                                | intronic       |
| 1  | 218143041 | C | T  | rs11577733            | 3.14E-05 | 0.149 | 0.203 | 0.69 | 0.55 | -0.86 | 7.32E-01 | 0.216 | 0.216 | 1.00 | 0.8  | -1.25 | 0.79 | 4.39E-03 | LINC00210(dist=48895), LOC101929631(dist=73806)      | intergenic     |
| 9  | 71829884  | A | C  | rs79650993            | 6.70E-01 | 0.032 | 0.028 | 1.15 | 0.72 | -1.83 | 1.33E-05 | 0.054 | 0.032 | 1.76 | 1.16 | -2.69 | 2.04 | 4.39E-03 | TJP2                                                 | intronic       |
| 18 | 21894517  | T | C  | rs2588565             | 4.63E-01 | 0.060 | 0.056 | 1.07 | 0.76 | -1.51 | 3.47E-06 | 0.070 | 0.037 | 1.97 | 1.35 | -2.87 | 1.61 | 4.39E-03 | OSBPL1A                                              | intronic       |
| 5  | 2904212   | G | A  | rs116674644           | 5.64E-01 | 0.028 | 0.025 | 1.10 | 0.67 | -1.82 | 3.51E-05 | 0.044 | 0.020 | 2.27 | 1.41 | -3.64 | 1.95 | 4.40E-03 | C5orf38(dist=148701), LINC01377(dist=273737)         | intergenic     |
| 1  | 241129318 | T | C  | rs6676722             | 9.48E-01 | 0.052 | 0.055 | 0.95 | 0.66 | -1.37 | 4.79E-06 | 0.089 | 0.050 | 1.86 | 1.33 | -2.6  | 1.66 | 4.41E-03 | RGST                                                 | intronic       |
| 1  | 154455949 | T | C  | rs12568083            | 5.89E-05 | 0.275 | 0.196 | 1.56 | 1.3  | -1.88 | 9.36E-01 | 0.235 | 0.246 | 0.94 | 0.75 | -1.17 | 1.26 | 4.42E-03 | SHE(NM_001010846:c.*676A>G)                          | UTR3           |
| 12 | 106585445 | G | A  | rs2936703             | 9.09E-01 | 0.418 | 0.425 | 0.97 | 0.82 | -1.14 | 2.08E-05 | 0.340 | 0.435 | 0.67 | 0.55 | -0.81 | 0.83 | 4.42E-03 | NUAK1(dist=51634), CKAP4(dist=46214)                 | intergenic     |
| 4  | 33544344  | G | A  | rs115762802           | 2.35E-05 | 0.072 | 0.041 | 1.80 | 1.29 | -2.51 | 4.45E-01 | 0.030 | 0.035 | 0.87 | 0.51 | -1.5  | 1.62 | 4.43E-03 | LOC10273828(dist=1387316), LOC101928622(dist=353617) | intergenic     |
| 9  | 22554515  | G | A  | rs116489947           | 7.35E-01 | 0.021 | 0.025 | 0.85 | 0.49 | -1.48 | 3.50E-08 | 0.053 | 0.021 | 2.61 | 1.68 | -4.04 | 1.96 | 4.43E-03 | DMRTA1(dist=102043), LINC01239(dist=91684)           | intergenic     |
| 13 | 91443276  | C | T  |                       |          |       |       |      |      |       |          |       |       |      |      |       |      |          |                                                      |                |

|    |           |   |   |             |          |       |       |      |      |       |          |       |       |      |      |       |      |          |                                                     |                |
|----|-----------|---|---|-------------|----------|-------|-------|------|------|-------|----------|-------|-------|------|------|-------|------|----------|-----------------------------------------------------|----------------|
| 3  | 88253508  | C | T | rs113737721 | 9.52E-01 | 0.040 | 0.042 | 0.95 | 0.63 | -1.44 | 8.39E-06 | 0.069 | 0.031 | 2.28 | 1.55 | -3.34 | 1.70 | 4.61E-03 | C3orf38(dist=46393), EPHA3(dist=903166)             | intergenic     |
| 10 | 14819394  | C | A | rs111715676 | 8.67E-06 | 0.158 | 0.224 | 0.65 | 0.52 | -0.81 | 3.22E-01 | 0.222 | 0.208 | 1.09 | 0.87 | -1.36 | 0.77 | 4.61E-03 | FAM107B(dist=2498), CDNF(dist=41857)                | intergenic     |
| 3  | 10234763  | G | A | rs55864356  | 4.16E-05 | 0.089 | 0.054 | 1.71 | 1.27 | -2.32 | 4.69E-01 | 0.056 | 0.060 | 0.93 | 0.62 | -1.39 | 1.52 | 4.64E-03 | IRAK2                                               | intronic       |
| 6  | 109676776 | G | A | rs10872032  | 7.24E-01 | 0.349 | 0.334 | 0.93 | 0.79 | -1.11 | 5.18E-05 | 0.439 | 0.365 | 0.73 | 0.61 | -0.89 | 0.82 | 4.67E-03 | CCDC162P(dist=47353), CD164(dist=10941)             | intergenic     |
| 16 | 80819520  | A | C | rs7194085   | 6.53E-01 | 0.068 | 0.066 | 1.04 | 0.75 | -1.44 | 2.78E-05 | 0.097 | 0.055 | 1.83 | 1.32 | -2.53 | 1.50 | 4.67E-03 | CDYL2                                               | intronic       |
| 6  | 104488635 | C | A | rs115168610 | 9.01E-01 | 0.036 | 0.035 | 1.02 | 0.66 | -1.59 | 3.21E-06 | 0.060 | 0.024 | 2.61 | 1.73 | -3.94 | 1.75 | 4.67E-03 | GRIK2(dist=1970677), HACE1(dist=687333)             | intergenic     |
| 21 | 40681644  | G | A | rs8128995   | 8.47E-01 | 0.032 | 0.032 | 1.02 | 0.64 | -1.61 | 3.95E-05 | 0.058 | 0.026 | 2.34 | 1.54 | -3.54 | 1.77 | 4.68E-03 | BRWD1                                               | intronic       |
| 11 | 117445302 | C | T | rs76779938  | 7.00E-01 | 0.053 | 0.052 | 1.02 | 0.71 | -1.47 | 5.48E-05 | 0.075 | 0.038 | 2.04 | 1.42 | -2.95 | 1.57 | 4.69E-03 | DSCAML1                                             | intronic       |
| 4  | 166586098 | T | G | rs114780293 | 1.77E-05 | 0.045 | 0.021 | 2.17 | 1.42 | -3.34 | 5.11E-01 | 0.018 | 0.023 | 0.80 | 0.4  | -1.6  | 1.96 | 4.69E-03 | CPE(dist=166616), LINC01179(dist=19693)             | intergenic     |
| 4  | 2805540   | C | T | rs115369762 | 7.57E-01 | 0.050 | 0.046 | 1.10 | 0.75 | -1.6  | 1.19E-05 | 0.086 | 0.054 | 1.66 | 1.18 | -2.33 | 1.65 | 4.70E-03 | SH3BP2                                              | intronic       |
| 18 | 6735931   | C | T | rs7244867   | 4.70E-01 | 0.134 | 0.132 | 1.01 | 0.8  | -1.29 | 4.15E-05 | 0.168 | 0.115 | 1.56 | 1.21 | -2.01 | 1.36 | 4.72E-03 | LINC01387(dist=145279), ARHGAP28(dist=98501)        | intergenic     |
| 9  | 22506667  | G | A | rs116351119 | 7.20E-01 | 0.021 | 0.025 | 0.84 | 0.48 | -1.47 | 3.35E-08 | 0.053 | 0.021 | 2.61 | 1.68 | -4.04 | 1.95 | 4.73E-03 | DMRTA1(dist=108195), LINC01239(dist=85532)          | intergenic     |
| 15 | 99149282  | G | A | rs77074269  | 8.45E-01 | 0.067 | 0.067 | 0.99 | 0.72 | -1.38 | 1.22E-06 | 0.099 | 0.060 | 1.72 | 1.25 | -2.36 | 1.61 | 4.74E-03 | FAM169B(dist=91671), IRAIN(dist=39813)              | intergenic     |
| 9  | 124435508 | A | G | rs12005676  | 7.30E-01 | 0.477 | 0.470 | 0.97 | 0.83 | -1.14 | 6.35E-05 | 0.411 | 0.506 | 1.47 | 1.22 | -1.78 | 1.22 | 4.76E-03 | DAB2IP                                              | intronic       |
| 9  | 22562331  | A | C | rs115177711 | 7.16E-01 | 0.021 | 0.025 | 0.84 | 0.48 | -1.47 | 3.26E-08 | 0.053 | 0.021 | 2.61 | 1.68 | -4.05 | 1.95 | 4.78E-03 | DMRTA1(dist=109859), LINC01239(dist=83868)          | intergenic     |
| 13 | 93123894  | G | T | rs9301814   | 3.58E-06 | 0.169 | 0.112 | 1.62 | 1.29 | -2.03 | 3.26E-01 | 0.113 | 0.126 | 0.89 | 0.66 | -1.2  | 1.33 | 4.78E-03 | GPC5                                                | intronic       |
| 6  | 130542171 | T | C | rs6569666   | 8.15E-06 | 0.205 | 0.271 | 0.69 | 0.57 | -0.84 | 4.79E-01 | 0.268 | 0.258 | 1.05 | 0.85 | -1.3  | 0.78 | 4.80E-03 | SAMD3                                               | intronic       |
| 13 | 106409350 | G | A | rs73573166  | 5.29E-01 | 0.088 | 0.086 | 1.03 | 0.77 | -1.38 | 2.66E-05 | 0.105 | 0.066 | 1.66 | 1.22 | -2.26 | 1.54 | 4.81E-03 | LINC00343                                           | ncRNA_intronic |
| 13 | 91434604  | A | T | rs9515803   | 5.43E-05 | 0.179 | 0.122 | 1.57 | 1.26 | -1.96 | 7.26E-01 | 0.143 | 0.154 | 0.92 | 0.71 | -1.2  | 1.31 | 4.83E-03 | LINC01049(dist=247009), LINC00410(dist=108604)      | intergenic     |
| 5  | 20371802  | G | A | rs77488796  | 5.34E-05 | 0.092 | 0.055 | 1.74 | 1.29 | -2.34 | 6.00E-01 | 0.041 | 0.044 | 0.93 | 0.58 | -1.49 | 1.51 | 4.85E-03 | CDH18                                               | intronic       |
| 6  | 150682701 | C | T | rs4869903   | 1.64E-05 | 0.227 | 0.309 | 0.66 | 0.54 | -0.79 | 7.02E-01 | 0.281 | 0.271 | 1.05 | 0.85 | -1.29 | 0.80 | 4.87E-03 | PPP1R14C(dist=111173), IYD(dist=7327)               | intergenic     |
| 9  | 121700692 | A | G | rs16907811  | 6.48E-01 | 0.036 | 0.030 | 1.22 | 0.78 | -1.9  | 6.05E-05 | 0.072 | 0.047 | 1.57 | 1.08 | -2.27 | 1.79 | 4.87E-03 | TLR4(dist=1220923), BRINP1(dist=228216)             | intergenic     |
| 14 | 63245075  | A | G | rs2016794   | 3.29E-05 | 0.327 | 0.409 | 1.42 | 1.2  | -1.69 | 5.73E-01 | 0.431 | 0.420 | 0.95 | 0.79 | -1.15 | 1.21 | 4.87E-03 | KCNH5                                               | intronic       |
| 5  | 2893495   | A | T | rs150540112 | 5.71E-01 | 0.027 | 0.025 | 1.10 | 0.67 | -1.82 | 4.38E-05 | 0.045 | 0.021 | 2.22 | 1.39 | -3.55 | 1.94 | 4.89E-03 | C5orf38(dist=137984), LINC01377(dist=284454)        | intergenic     |
| 13 | 91430926  | G | C | rs12877329  | 5.87E-05 | 0.179 | 0.122 | 1.57 | 1.26 | -1.96 | 7.32E-01 | 0.143 | 0.153 | 0.92 | 0.71 | -1.2  | 1.31 | 4.93E-03 | LINC01049(dist=243331), LINC00410(dist=112282)      | intergenic     |
| 8  | 145072422 | G | A | rs11993076  | 5.45E-05 | 0.149 | 0.102 | 1.55 | 1.22 | -1.96 | 4.54E-01 | 0.093 | 0.101 | 0.92 | 0.67 | -1.27 | 1.35 | 4.94E-03 | GRINA(dist=4839), SPATC1(dist=14160)                | intergenic     |
| 1  | 53910840  | C | T | rs149876858 | 9.75E-01 | 0.028 | 0.030 | 0.92 | 0.56 | -1.52 | 6.76E-06 | 0.057 | 0.025 | 2.40 | 1.58 | -3.65 | 1.80 | 4.98E-03 | SLC25A3P1(dist=5147), MYRTB1(dist=14232)            | intergenic     |
| 2  | 240996197 | C | A | rs13390961  | 6.27E-01 | 0.105 | 0.105 | 1.00 | 0.77 | -1.31 | 3.93E-05 | 0.159 | 0.105 | 1.61 | 1.24 | -2.09 | 1.38 | 4.98E-03 | OR6B3(dist=10708), MYEOV2(dist=69783)               | intergenic     |
| 5  | 2891793   | T | A | rs116833638 | 5.82E-01 | 0.027 | 0.025 | 1.10 | 0.66 | -1.81 | 4.16E-05 | 0.045 | 0.021 | 2.22 | 1.39 | -3.54 | 1.94 | 5.01E-03 | C5orf38(dist=136282), LINC01377(dist=286156)        | intergenic     |
| 3  | 10233925  | G | A | rs73811846  | 4.88E-05 | 0.089 | 0.054 | 1.70 | 1.26 | -2.3  | 4.74E-01 | 0.056 | 0.060 | 0.93 | 0.62 | -1.39 | 1.51 | 5.02E-03 | IRAK2                                               | intronic       |
| 1  | 30416211  | G | A | rs4949521   | 9.03E-01 | 0.351 | 0.357 | 0.97 | 0.82 | -1.15 | 2.56E-05 | 0.273 | 0.357 | 0.68 | 0.55 | -0.83 | 0.83 | 5.03E-03 | LOC101928460(dist=739585), LOC101929406(dist=70588) | intergenic     |
| 6  | 70889980  | G | A | rs141582098 | 7.39E-01 | 0.069 | 0.067 | 1.03 | 0.74 | -1.42 | 2.32E-05 | 0.100 | 0.052 | 2.02 | 1.46 | -2.78 | 1.48 | 5.04E-03 | COL19A1                                             | intronic       |
| 8  | 1235249   | G | C | rs13249390  | 2.26E-05 | 0.145 | 0.090 | 1.71 | 1.34 | -2.17 | 5.16E-01 | 0.102 | 0.117 | 0.86 | 0.64 | -1.17 | 1.36 | 5.04E-03 | ERICH1-AS1(dist=147472), LOC286083(dist=9045)       | intergenic     |
| 6  | 70890113  | C | T | rs114126513 | 7.40E-01 | 0.069 | 0.067 | 1.03 | 0.74 | -1.42 | 2.33E-05 | 0.100 | 0.052 | 2.02 | 1.46 | -2.78 | 1.48 | 5.05E-03 | COL19A1                                             | intronic       |
| 3  | 115520252 | A | G | rs13070648  | 8.77E-01 | 0.066 | 0.064 | 1.02 | 0.74 | -1.42 | 5.78E-05 | 0.117 | 0.068 | 1.81 | 1.34 | -2.43 | 1.45 | 5.06E-03 | LSAMP                                               | downstream     |
| 9  | 22577818  | G | T | rs149010408 | 6.99E-01 | 0.021 | 0.025 | 0.83 | 0.47 | -1.46 | 2.76E-08 | 0.052 | 0.021 | 2.60 | 1.68 | -4.05 | 1.94 | 5.07E-03 | DMRTA1(dist=125346), LINC01239(dist=68381)          | intergenic     |
| 1  | 39221758  | G | A | rs78264562  | 7.41E-01 | 0.075 | 0.075 | 1.01 | 0.74 | -1.37 | 6.40E-05 | 0.108 | 0.070 | 1.61 | 1.19 | -2.19 | 1.54 | 5.09E-03 | LINC01343(dist=541319), RRAGC(dist=82111)           | intergenic     |
| 6  | 70836651  | G | A | rs74942728  | 7.43E-01 | 0.069 | 0.067 | 1.03 | 0.74 | -1.42 | 2.34E-05 | 0.100 | 0.052 | 2.01 | 1.46 | -2.77 | 1.48 | 5.09E-03 | COL19A1                                             | intronic       |
| 18 | 6754476   | G | A | rs73380752  | 4.89E-01 | 0.132 | 0.130 | 1.01 | 0.79 | -1.29 | 4.60E-05 | 0.167 | 0.115 | 1.55 | 1.2  | -2    | 1.37 | 5.10E-03 | LINC01387(dist=163824), ARHGAP28(dist=79956)        | intergenic     |
| 13 | 91429074  | A | G | rs9515801   | 5.96E-05 | 0.179 | 0.122 | 1.57 | 1.26 | -1.96 | 7.23E-01 | 0.143 | 0.153 | 0.92 | 0.71 | -1.2  | 1.31 | 5.10E-03 | LINC01049(dist=241479), LINC00410(dist=114134)      | intergenic     |
| 13 | 91441129  | G | A | rs272081    | 7.58E-06 | 0.335 | 0.247 | 1.54 | 1.29 | -1.83 | 3.23E-01 | 0.258 | 0.288 | 0.86 | 0.7  | -1.07 | 1.23 | 5.11E-03 | LINC01049(dist=253534), LINC00410(dist=102079)      | intergenic     |
| 2  | 58821003  | T | C | rs76539582  | 2.87E-05 | 0.064 | 0.033 | 2.05 | 1.43 | -2.93 | 4.86E-01 | 0.032 | 0.038 | 0.84 | 0.49 | -1.42 | 1.68 | 5.12E-03 | LINC01122                                           | ncRNA_intronic |
| 4  | 168192161 | C | G | rs143250500 | 8.26E-01 | 0.048 | 0.046 | 1.04 | 0.71 | -1.52 | 1.57E-06 | 0.070 | 0.040 | 1.80 | 1.24 | -2.62 | 1.69 | 5.15E-03 | SPOCK3(dist=36420), ANXA10(dist=821527)             | intergenic     |
| 15 | 83487995  | A | G | rs147318291 | 3.04E-01 | 0.031 | 0.039 | 0.78 | 0.5  | -1.24 | 2.23E-08 | 0.089 | 0.041 | 2.30 | 1.64 | -3.24 | 1.62 | 5.16E-03 | WHAMM                                               | intronic       |
| 1  | 116411637 | A | G | rs4839497   | 1.30E-05 | 0.574 | 0.473 | 1.50 | 1.28 | -1.77 | 4.00E-01 | 0.493 | 0.468 | 0.90 | 0.75 | -1.09 | 1.21 | 5.16E-03 | NHLH2(dist=27890), LOC101928995(dist=50360)         | intergenic     |
| 20 | 58162514  | G | C | rs57101530  | 5.68E-05 | 0.065 | 0.041 | 1.63 | 1.15 | -2.31 | 7.11E-01 | 0.034 | 0.034 | 0.98 | 0.59 | -1.65 | 1.81 | 5.17E-03 | PHACTR3                                             | intronic       |
| 21 | 40550534  | T | C | rs8131611   | 7.84E-01 | 0.034 | 0.033 | 1.02 | 0.65 | -1.6  | 1.03E-05 | 0.055 | 0.025 | 2.27 | 1.48 | -3.47 | 1.79 | 5.18E-03 | PSMG1                                               | exonic         |
| 9  | 22582920  | C | G | rs12000009  | 6.93E-01 | 0.021 | 0.025 | 0.83 | 0.47 | -1.46 | 2.63E-08 | 0.052 | 0.021 | 2.60 | 1.67 | -4.04 | 1.94 | 5.19E-03 | DMRTA1(dist=130448), LINC01239(dist=63279)          | intergenic     |
| 9  | 22584650  | C | T | rs115089568 | 6.92E-01 | 0.021 | 0.025 | 0.83 | 0.47 | -1.46 | 2.54E-08 | 0.052 | 0.021 | 2.60 | 1.67 | -4.04 | 1.94 | 5.19E-03 | DMRTA1(dist=132178), LINC01239(dist=61549)          | intergenic     |
| 6  | 104486553 | G | C | rs115682953 | 5.72E-01 | 0.067 | 0.063 | 1.07 | 0.77 | -1.48 | 4.18E-05 | 0.083 | 0.041 | 2.11 | 1.48 | -2.99 | 1.52 | 5.20E-03 | GRIK2(dist=1968595), HACE1(dist=689415)             | intergenic     |
| 20 | 53570491  | C | T | rs1125961   | 8.85E-01 | 0.163 | 0.157 | 1.05 | 0.84 | -1.3  | 1.21E-05 | 0.228 | 0.165 | 1.49 | 1.19 | -1.87 | 1.29 | 5.21E-03 | DOK5(dist=302781), LINC01441(dist=466383)           | intergenic     |
| 14 | 63273158  | A | G | rs1844509   | 2.50E-05 | 0.322 | 0.403 | 1.42 | 1.2  | -1.69 | 4.91E-01 | 0.429 | 0.417 | 0.95 | 0.79 | -1.15 | 1.21 | 5.23E-03 | KCNH5                                               | intronic       |
| 9  | 22588509  | C | G | rs116317217 | 6.83E-01 | 0.020 | 0.024 | 0.83 | 0.47 | -1.46 | 1.96E-08 | 0.052 | 0.021 | 2.59 | 1.67 | -4.04 | 1.96 | 5.24E-03 | DMRTA1(dist=136037), LINC01239(dist=57690)          | intergenic     |
| 3  | 62086558  | A | G | rs6772567   | 6.07E-05 | 0.078 | 0.043 | 1.90 | 1.37 | -2.63 | 7.86E-01 | 0.043 | 0.048 | 0.88 | 0.56 | -1.4  | 1.57 | 5.24E-03 | PTPRG                                               | intronic       |
| 10 | 17425548  | T | C | rs381545    | 6.30E-01 | 0.423 | 0.412 | 1.05 | 0.89 | -1.23 | 6.24E-05 | 0.478 | 0.397 | 1.39 | 1.15 | -1.67 | 1.22 | 5.26E-03 | ST8SIA6                                             | intronic       |
| 5  | 13453439  | A | T | rs722784    | 9.30E-01 | 0.062 | 0.060 | 1.04 | 0.74 | -1.45 | 5.35E-05 | 0.106 | 0.065 | 1.71 | 1.26 | -2.33 | 1.47 | 5.26E-03 | LINC01194(dist=648144), DNAH5(dist=236998)          | intergenic     |
| 10 | 74091924  | T | C | rs9415066   | 8.74E-01 | 0.448 | 0.438 |      |      |       |          |       |       |      |      |       |      |          |                                                     |                |

|    |           |   |   |                        |          |       |       |      |      |       |          |       |       |      |      |       |      |          |                                                     |               |
|----|-----------|---|---|------------------------|----------|-------|-------|------|------|-------|----------|-------|-------|------|------|-------|------|----------|-----------------------------------------------------|---------------|
| 1  | 30415026  | G | A | rs1498243              | 9.27E-01 | 0.351 | 0.357 | 0.97 | 0.82 | -1.16 | 2.61E-05 | 0.273 | 0.356 | 0.68 | 0.55 | -0.83 | 0.83 | 5.42E-03 | LOC101928460(dist=738400), LOC101929406(dist=71773) | intergenic    |
| 13 | 91425041  | A | G | rs9560684              | 6.48E-05 | 0.178 | 0.121 | 1.57 | 1.26 | -1.96 | 7.17E-01 | 0.144 | 0.154 | 0.92 | 0.7  | -1.2  | 1.30 | 5.43E-03 | LINC01049(dist=237446), LINC00410(dist=118167)      | intergenic    |
| 15 | 62101266  | C | T | rs73426761             | 2.89E-05 | 0.048 | 0.023 | 2.16 | 1.42 | -3.28 | 4.38E-01 | 0.020 | 0.024 | 0.82 | 0.42 | -1.59 | 1.82 | 5.45E-03 | RORA(dist=579764), VPS13C(dist=43324)               | intergenic    |
| 3  | 88266312  | G | A | rs111278862            | 9.74E-01 | 0.041 | 0.042 | 0.97 | 0.64 | -1.46 | 1.82E-05 | 0.067 | 0.032 | 2.21 | 1.5  | -3.25 | 1.68 | 5.46E-03 | C3orf38(dist=59197), EPHA3(dist=890362)             | intergenic    |
| 6  | 37073960  | G | A | rs116412512            | 3.81E-05 | 0.049 | 0.025 | 1.97 | 1.31 | -2.96 | 6.30E-01 | 0.020 | 0.022 | 0.91 | 0.47 | -1.79 | 1.92 | 5.46E-03 | FGD2(dist=77115), PIM1(dist=63962)                  | intergenic    |
| 21 | 27254586  | A | G | rs2144486              | 2.91E-05 | 0.066 | 0.030 | 0.44 | 0.31 | -0.64 | 6.78E-01 | 0.035 | 0.040 | 1.16 | 0.7  | -1.92 | 0.61 | 5.47E-03 | APP                                                 | intronic      |
| 10 | 97328657  | C | T | rs74150946;rs386746753 | 3.11E-05 | 0.200 | 0.147 | 1.45 | 1.18 | -1.79 | 6.39E-01 | 0.142 | 0.147 | 0.96 | 0.74 | -1.26 | 1.31 | 5.47E-03 | SORBS1(dist=7480), ALDH18A1(dist=37029)             | intergenic    |
| 1  | 203978034 | G | A | rs78832387             | 4.76E-01 | 0.106 | 0.100 | 1.06 | 0.81 | -1.38 | 3.56E-05 | 0.114 | 0.075 | 1.60 | 1.19 | -2.15 | 1.47 | 5.48E-03 | SNRPE(dist=137754), LINC00303(dist=23541)           | intergenic    |
| 1  | 157590482 | T | C | rs2146208              | 9.93E-01 | 0.451 | 0.448 | 1.01 | 0.86 | -1.19 | 1.45E-05 | 0.363 | 0.459 | 0.67 | 0.55 | -0.81 | 0.83 | 5.48E-03 | FCRL4(dist=22612), FCRL3(dist=57496)                | intergenic    |
| 4  | 2786525   | C | T | rs7439819              | 6.57E-01 | 0.082 | 0.077 | 1.06 | 0.79 | -1.43 | 1.85E-05 | 0.108 | 0.070 | 1.62 | 1.19 | -2.19 | 1.51 | 5.48E-03 | TNIP2(dist=28422), SH3BP2(dist=8225)                | intergenic    |
| 13 | 32315308  | C | A | rs114954516            | 6.82E-01 | 0.046 | 0.046 | 0.99 | 0.67 | -1.46 | 4.58E-05 | 0.065 | 0.032 | 2.08 | 1.4  | -3.07 | 1.65 | 5.48E-03 | RXFP2                                               | intronic      |
| 16 | 80824536  | G | C | rs114574313            | 7.31E-01 | 0.066 | 0.065 | 1.02 | 0.73 | -1.42 | 1.48E-05 | 0.088 | 0.047 | 1.95 | 1.39 | -2.74 | 1.51 | 5.49E-03 | CDYL2                                               | intronic      |
| 17 | 40375281  | T | G | rs114196602            | 5.14E-01 | 0.031 | 0.027 | 1.13 | 0.7  | -1.82 | 1.35E-05 | 0.041 | 0.020 | 2.08 | 1.28 | -3.37 | 2.02 | 5.49E-03 | STAT5B                                              | intronic      |
| 6  | 70909586  | T | C | rs78798811             | 7.58E-01 | 0.068 | 0.066 | 1.02 | 0.74 | -1.41 | 3.28E-05 | 0.101 | 0.054 | 1.98 | 1.44 | -2.72 | 1.47 | 5.52E-03 | COL19A1                                             | intronic      |
| 1  | 30413157  | C | A | rs1498240              | 7.79E-01 | 0.463 | 0.473 | 0.96 | 0.81 | -1.13 | 5.93E-05 | 0.390 | 0.467 | 0.73 | 0.6  | -0.88 | 0.82 | 5.55E-03 | LOC101928460(dist=736531), LOC101929406(dist=73642) | intergenic    |
| 15 | 100463142 | T | C | rs55816900             | 9.27E-01 | 0.025 | 0.021 | 1.18 | 0.7  | -2    | 2.86E-05 | 0.052 | 0.028 | 1.89 | 1.23 | -2.93 | 1.92 | 5.60E-03 | DNM1P46(dist=116010), ADAMTS17(dist=48501)          | intergenic    |
| 18 | 56911688  | G | A | rs643306               | 6.87E-01 | 0.068 | 0.062 | 0.90 | 0.65 | -1.25 | 2.30E-05 | 0.123 | 0.088 | 0.68 | 0.51 | -0.91 | 0.67 | 5.64E-03 | GRP(dist=13686), RAX(dist=22579)                    | intergenic    |
| 6  | 109698306 | C | T | rs9480942              | 8.29E-01 | 0.084 | 0.079 | 1.07 | 0.79 | -1.43 | 9.79E-06 | 0.158 | 0.111 | 1.51 | 1.16 | -1.96 | 1.42 | 5.64E-03 | CD164                                               | intronic      |
| 2  | 231484740 | G | A | rs187691707            | 7.80E-01 | 0.021 | 0.021 | 0.99 | 0.56 | -1.74 | 2.70E-05 | 0.045 | 0.024 | 1.95 | 1.22 | -3.09 | 2.21 | 5.67E-03 | SP100(dist=74423), LOC151475(dist=70896)            | intergenic    |
| 7  | 38209837  | C | A | rs7801794              | 4.27E-05 | 0.120 | 0.182 | 0.61 | 0.48 | -0.78 | 5.75E-01 | 0.193 | 0.181 | 1.08 | 0.85 | -1.37 | 0.79 | 5.72E-03 | EPDR1(dist=218295), STARD3NL(dist=7971)             | intergenic    |
| 1  | 30554008  | T | C | rs393480               | 8.20E-01 | 0.295 | 0.293 | 0.99 | 0.83 | -1.19 | 2.79E-05 | 0.361 | 0.281 | 0.69 | 0.57 | -0.84 | 0.81 | 5.75E-03 | LOC101929406(dist=43549), MATN1(dist=630116)        | intergenic    |
| 13 | 107917576 | G | T | rs141548020            | 7.94E-01 | 0.033 | 0.031 | 1.05 | 0.66 | -1.66 | 1.30E-06 | 0.054 | 0.028 | 2.02 | 1.32 | -3.08 | 1.90 | 5.76E-03 | FAM155A                                             | intronic      |
| 13 | 107917917 | G | T | rs147145776            | 7.96E-01 | 0.033 | 0.031 | 1.05 | 0.66 | -1.66 | 1.25E-06 | 0.054 | 0.028 | 2.02 | 1.32 | -3.09 | 1.90 | 5.77E-03 | FAM155A                                             | intronic      |
| 14 | 63273325  | A | T | rs4386055              | 2.78E-05 | 0.322 | 0.403 | 1.42 | 1.2  | -1.69 | 4.79E-01 | 0.428 | 0.416 | 0.95 | 0.79 | -1.15 | 1.21 | 5.78E-03 | KCNH5                                               | intronic      |
| 20 | 53567133  | T | C | rs6127334              | 8.49E-01 | 0.165 | 0.158 | 1.05 | 0.84 | -1.31 | 2.00E-05 | 0.228 | 0.166 | 1.48 | 1.18 | -1.85 | 1.29 | 5.80E-03 | DOK5(dist=299423), LINC01441(dist=469741)           | intergenic    |
| 13 | 97601655  | A | T | rs112625619            | 8.33E-01 | 0.035 | 0.036 | 0.97 | 0.62 | -1.51 | 5.80E-06 | 0.060 | 0.030 | 2.06 | 1.37 | -3.09 | 1.78 | 5.80E-03 | LINC00359                                           | mRNA_intronic |
| 20 | 53573928  | G | A | rs1499864              | 8.60E-01 | 0.167 | 0.160 | 1.05 | 0.84 | -1.31 | 1.72E-05 | 0.228 | 0.166 | 1.48 | 1.18 | -1.85 | 1.29 | 5.81E-03 | DOK5(dist=306218), LINC01441(dist=462946)           | intergenic    |
| 1  | 21344145  | A | G | rs6697563              | 3.54E-05 | 0.382 | 0.310 | 1.38 | 1.16 | -1.63 | 7.00E-01 | 0.339 | 0.349 | 0.95 | 0.78 | -1.16 | 1.23 | 5.82E-03 | EIF4G3                                              | intronic      |
| 1  | 60057484  | G | A | rs140193829            | 7.06E-01 | 0.046 | 0.044 | 1.04 | 0.7  | -1.54 | 3.80E-05 | 0.068 | 0.036 | 1.96 | 1.34 | -2.87 | 1.64 | 5.84E-03 | FGGY                                                | intronic      |
| 15 | 48849728  | C | T | rs2437948              | 4.73E-05 | 0.390 | 0.462 | 1.34 | 1.13 | -1.58 | 5.82E-01 | 0.469 | 0.466 | 0.99 | 0.82 | -1.19 | 1.20 | 5.86E-03 | FBN1                                                | intronic      |
| 6  | 70930935  | G | A | rs79979095             | 8.56E-01 | 0.075 | 0.075 | 1.00 | 0.73 | -1.36 | 1.23E-05 | 0.106 | 0.056 | 2.01 | 1.47 | -2.74 | 1.45 | 5.87E-03 | COL9A1                                              | intronic      |
| 3  | 88249660  | G | T | rs113992786            | 9.52E-01 | 0.040 | 0.042 | 0.95 | 0.63 | -1.44 | 1.50E-05 | 0.067 | 0.031 | 2.25 | 1.53 | -3.31 | 1.67 | 5.88E-03 | C3orf38(dist=42545), EPHA3(dist=907014)             | intergenic    |
| 4  | 168172401 | T | C | rs386681792;rs73861955 | 7.18E-01 | 0.075 | 0.072 | 1.04 | 0.76 | -1.41 | 6.10E-05 | 0.108 | 0.069 | 1.62 | 1.19 | -2.2  | 1.46 | 5.89E-03 | SPOCK3(dist=16660), ANXA10(dist=841287)             | intergenic    |
| 9  | 100107401 | T | C | rs74928160             | 5.04E-06 | 0.061 | 0.034 | 1.86 | 1.29 | -2.67 | 4.15E-01 | 0.029 | 0.035 | 0.83 | 0.48 | -1.44 | 1.79 | 5.92E-03 | LOC100499484-C9ORF174                               | mRNA_intronic |
| 15 | 52185661  | A | C | rs182070272            | 7.97E-01 | 0.021 | 0.021 | 1.03 | 0.58 | -1.8  | 2.58E-05 | 0.044 | 0.020 | 2.23 | 1.39 | -3.58 | 1.97 | 5.92E-03 | TMOD3                                               | intronic      |
| 12 | 126203425 | A | G | rs16919437             | 8.46E-01 | 0.105 | 0.103 | 1.02 | 0.78 | -1.33 | 4.87E-05 | 0.149 | 0.094 | 1.69 | 1.3  | -2.21 | 1.36 | 5.92E-03 | TMEM132B(dist=56502), LINC00939(dist=239809)        | intergenic    |
| 1  | 16090101  | G | A | rs181295540            | 6.45E-01 | 0.032 | 0.031 | 1.05 | 0.66 | -1.67 | 9.85E-06 | 0.045 | 0.020 | 2.27 | 1.42 | -3.64 | 1.90 | 5.93E-03 | FBLIM1                                              | intronic      |
| 6  | 70910853  | G | A | rs16868655             | 7.76E-01 | 0.067 | 0.066 | 1.02 | 0.73 | -1.41 | 3.43E-05 | 0.101 | 0.054 | 1.97 | 1.43 | -2.71 | 1.47 | 5.94E-03 | COL19A1                                             | intronic      |
| 5  | 30915157  | A | T | rs113369982            | 4.71E-06 | 0.080 | 0.050 | 1.67 | 1.22 | -2.29 | 1.95E-01 | 0.028 | 0.036 | 0.78 | 0.45 | -1.36 | 1.66 | 5.97E-03 | LOC101929681(dist=1519074), CDH6(dist=278605)       | intergenic    |
| 12 | 100657464 | T | C | rs7307415              | 6.21E-05 | 0.303 | 0.238 | 1.39 | 1.16 | -1.67 | 6.09E-01 | 0.247 | 0.247 | 1.00 | 0.8  | -1.24 | 1.24 | 5.97E-03 | DEPDC4                                              | exonic        |
| 20 | 36956901  | G | A | rs7269817              | 3.06E-05 | 0.128 | 0.086 | 1.56 | 1.21 | -2.01 | 4.45E-01 | 0.091 | 0.097 | 0.94 | 0.68 | -1.3  | 1.40 | 6.05E-03 | BPI                                                 | intronic      |
| 19 | 5536761   | G | C | rs766656               | 4.49E-05 | 0.094 | 0.054 | 1.82 | 1.35 | -2.45 | 5.77E-01 | 0.071 | 0.081 | 0.86 | 0.6  | -1.24 | 1.50 | 6.06E-03 | ZNRF4(dist=79894), TINCR(dist=21417)                | intergenic    |
| 1  | 84321116  | C | T | rs12118538             | 9.99E-01 | 0.121 | 0.120 | 1.02 | 0.79 | -1.31 | 3.22E-05 | 0.171 | 0.117 | 1.55 | 1.21 | -2    | 1.36 | 6.12E-03 | LOC101927560, LOC101927587, MIR548AP                | mRNA_intronic |
| 1  | 30548259  | A | G | rs267668               | 8.02E-01 | 0.285 | 0.283 | 0.99 | 0.83 | -1.19 | 3.71E-05 | 0.358 | 0.279 | 0.69 | 0.57 | -0.84 | 0.81 | 6.13E-03 | LOC101929406(dist=37800), MATN1(dist=635865)        | intergenic    |
| 4  | 163929416 | A | G | rs79534320             | 6.64E-01 | 0.066 | 0.064 | 1.03 | 0.74 | -1.44 | 4.98E-05 | 0.081 | 0.044 | 1.91 | 1.34 | -2.71 | 1.54 | 6.17E-03 | FSTL5(dist=844230), MIR4454(dist=85310)             | intergenic    |
| 12 | 12111404  | G | A | rs77783783             | 4.18E-01 | 0.045 | 0.053 | 0.83 | 0.56 | -1.23 | 6.11E-10 | 0.086 | 0.039 | 2.32 | 1.64 | -3.28 | 1.65 | 6.19E-03 | RNU6-19P(dist=32297), BCL2L14(dist=112474)          | intergenic    |
| 1  | 30414182  | T | G | rs16833076             | 9.88E-01 | 0.357 | 0.362 | 0.98 | 0.83 | -1.16 | 2.45E-05 | 0.275 | 0.360 | 0.68 | 0.55 | -0.83 | 0.83 | 6.19E-03 | LOC101928460(dist=737556), LOC101929406(dist=72617) | intergenic    |
| 13 | 32310927  | T | C | rs115142619            | 7.15E-01 | 0.043 | 0.044 | 0.98 | 0.66 | -1.47 | 6.27E-06 | 0.063 | 0.032 | 2.00 | 1.34 | -2.98 | 1.70 | 6.23E-03 | B3GALT1(dist=404516), RXFP2(dist=2752)              | intergenic    |
| 20 | 52046313  | T | C | rs6013682              | 9.32E-01 | 0.044 | 0.044 | 1.01 | 0.68 | -1.51 | 4.79E-05 | 0.077 | 0.042 | 1.89 | 1.32 | -2.72 | 1.58 | 6.25E-03 | TSHZ2                                               | intronic      |
| 3  | 133436577 | G | T | rs75581091             | 9.24E-01 | 0.057 | 0.056 | 1.03 | 0.72 | -1.46 | 2.13E-05 | 0.100 | 0.056 | 1.89 | 1.37 | -2.6  | 1.48 | 6.30E-03 | TOPBP1(dist=55840), TF(dist=28400)                  | intergenic    |
| 7  | 38823957  | G | A | rs115653513            | 6.89E-01 | 0.046 | 0.043 | 1.06 | 0.72 | -1.57 | 5.10E-05 | 0.072 | 0.035 | 2.13 | 1.47 | -3.09 | 1.58 | 6.31E-03 | VPS41                                               | intronic      |
| 1  | 157585800 | G | T | rs1998380              | 7.22E-01 | 0.041 | 0.433 | 1.03 | 0.88 | -1.22 | 2.78E-06 | 0.333 | 0.434 | 0.65 | 0.53 | -0.79 | 0.83 | 6.31E-03 | FCRL4(dist=17930), FCRL3(dist=62178)                | intergenic    |
| 11 | 86488552  | C | T | rs17149420             | 6.75E-01 | 0.041 | 0.038 | 1.07 | 0.7  | -1.61 | 5.08E-05 | 0.062 | 0.031 | 2.05 | 1.37 | -3.06 | 1.69 | 6.33E-03 | ME3(dist=104874), PRSS23(dist=13549)                | intergenic    |
| 7  | 38204054  | G | C | rs62443294             | 5.14E-05 | 0.123 | 0.186 | 0.62 | 0.48 | -0.78 | 5.74E-01 | 0.192 | 0.181 | 1.08 | 0.85 | -1.37 | 0.80 | 6.34E-03 | EPDR1(dist=212512), STARD3NL(dist=13754)            | intergenic    |
| 4  | 154561898 | T | C | rs73856946             | 6.94E-01 | 0.021 | 0.020 | 1.04 | 0.59 | -1.83 | 2.99E-05 | 0.042 | 0.023 | 1.85 | 1.15 | -2.98 | 2.32 | 6.34E-03 | KIAA0922(dist=4036), TLR2(dist=43543)               | intergenic    |
| 7  | 38778048  | A | C | rs114544008            | 6.39E-01 | 0.043 | 0.039 | 1.08 | 0.72 | -1.63 | 5.69E-05 | 0.067 | 0.033 | 2.15 | 1.46 | -3.16 | 1.60 | 6.35E-03 | VPS41                                               | intronic      |
| 8  | 38733509  | A | G | rs78162737             | 2.23E-05 | 0.072 | 0.038 |      |      |       |          |       |       |      |      |       |      |          |                                                     |               |

|    |           |   |   |             |          |       |       |      |      |       |          |       |       |      |      |       |      |          |                                                     |                |
|----|-----------|---|---|-------------|----------|-------|-------|------|------|-------|----------|-------|-------|------|------|-------|------|----------|-----------------------------------------------------|----------------|
| 6  | 70904191  | T | G | rs16868648  | 7.19E-01 | 0.069 | 0.067 | 1.03 | 0.75 | -1.42 | 4.92E-05 | 0.101 | 0.055 | 1.92 | 1.39 | -2.63 | 1.46 | 6.67E-03 | COL19A1                                             | intronic       |
| 13 | 106414968 | T | C | rs73573172  | 8.97E-01 | 0.096 | 0.098 | 0.98 | 0.74 | -1.29 | 1.97E-05 | 0.139 | 0.081 | 1.83 | 1.39 | -2.41 | 1.36 | 6.67E-03 | LINC00343                                           | downstream     |
| 12 | 78163345  | A | G | rs11106639  | 8.67E-01 | 0.041 | 0.033 | 1.26 | 0.83 | -1.91 | 6.17E-05 | 0.072 | 0.047 | 1.58 | 1.09 | -2.28 | 1.65 | 6.71E-03 | E2F7(dist=703985), NAV3(dist=61724)                 | intergenic     |
| 2  | 77968806  | G | C | rs147616104 | 4.72E-01 | 0.025 | 0.030 | 0.81 | 0.49 | -1.36 | 9.73E-08 | 0.069 | 0.027 | 2.61 | 1.77 | -3.85 | 1.70 | 6.75E-03 | LRRTM4(dist=219304), LOC101927967(dist=2016)        | intergenic     |
| 15 | 83608298  | T | C | rs114563075 | 4.19E-01 | 0.035 | 0.042 | 0.83 | 0.54 | -1.28 | 1.88E-07 | 0.092 | 0.044 | 2.18 | 1.56 | -3.04 | 1.57 | 6.75E-03 | HOMER2                                              | intronic       |
| 7  | 67322397  | C | G | rs139476158 | 5.76E-01 | 0.026 | 0.023 | 1.12 | 0.67 | -1.88 | 7.24E-07 | 0.043 | 0.021 | 2.12 | 1.32 | -3.41 | 1.96 | 6.77E-03 | LINC01372(dist=517385), LOC102723427(dist=162843)   | intergenic     |
| 10 | 50810891  | T | C | rs11101179  | 6.17E-05 | 0.089 | 0.045 | 2.05 | 1.5  | -2.79 | 9.35E-01 | 0.078 | 0.085 | 0.91 | 0.64 | -1.29 | 1.50 | 6.78E-03 | ERCC6-PGBD3(dist=63307), CHAT7(dist=6250)           | intergenic     |
| 2  | 58979401  | C | A | rs116794791 | 5.97E-01 | 0.030 | 0.027 | 1.15 | 0.71 | -1.85 | 3.14E-05 | 0.069 | 0.041 | 1.75 | 1.2  | -2.55 | 1.69 | 6.79E-03 | LINC01122                                           | ncRNA_intronic |
| 4  | 125411255 | G | A | rs115561049 | 5.62E-05 | 0.127 | 0.085 | 1.57 | 1.22 | -2.03 | 5.30E-01 | 0.091 | 0.095 | 0.96 | 0.69 | -1.32 | 1.37 | 6.82E-03 | LINC01091(dist=559737), LOC101927087(dist=9842)     | intergenic     |
| 14 | 68824721  | G | C | rs12894080  | 2.50E-05 | 0.084 | 0.046 | 1.88 | 1.37 | -2.57 | 5.62E-01 | 0.059 | 0.069 | 0.85 | 0.57 | -1.26 | 1.57 | 6.82E-03 | RAD51B                                              | intronic       |
| 11 | 130545470 | G | A | rs116752730 | 6.26E-01 | 0.037 | 0.035 | 1.07 | 0.69 | -1.64 | 1.23E-05 | 0.055 | 0.030 | 1.86 | 1.22 | -2.84 | 1.80 | 6.84E-03 | C11orf44                                            | intronic       |
| 20 | 53576185  | C | T | rs6123437   | 9.03E-01 | 0.170 | 0.163 | 1.05 | 0.84 | -1.3  | 1.67E-05 | 0.228 | 0.167 | 1.48 | 1.18 | -1.85 | 1.28 | 6.84E-03 | DOK5(dist=308475), LINC01441(dist=460689)           | intergenic     |
| 15 | 62104327  | G | T | rs73426771  | 2.67E-05 | 0.050 | 0.026 | 2.01 | 1.34 | -3.02 | 4.46E-01 | 0.021 | 0.026 | 0.82 | 0.43 | -1.57 | 1.77 | 6.86E-03 | RORA(dist=582825), VPS13C(dist=40263)               | intergenic     |
| 19 | 52797969  | A | G | rs74670592  | 9.56E-01 | 0.109 | 0.107 | 1.03 | 0.79 | -1.33 | 4.77E-05 | 0.162 | 0.105 | 1.65 | 1.28 | -2.14 | 1.33 | 6.87E-03 | ZNF766(dist=1993), ZNF480(dist=2453)                | intergenic     |
| 8  | 28994508  | G | A | rs112780567 | 8.42E-01 | 0.030 | 0.031 | 0.96 | 0.6  | -1.55 | 1.81E-05 | 0.052 | 0.025 | 2.10 | 1.36 | -3.25 | 1.95 | 6.93E-03 | KIF13B                                              | intronic       |
| 2  | 69676058  | G | A | rs115914212 | 6.65E-03 | 0.016 | 0.026 | 0.59 | 0.31 | -1.11 | 1.62E-06 | 0.056 | 0.038 | 1.47 | 0.97 | -2.23 | 0.43 | 6.98E-03 | NFU1(dist=11298), AAK1(dist=9069)                   | intergenic     |
| 4  | 2784424   | G | A | rs111807774 | 6.76E-01 | 0.075 | 0.073 | 1.03 | 0.75 | -1.4  | 1.51E-05 | 0.096 | 0.061 | 1.65 | 1.19 | -2.28 | 1.55 | 6.99E-03 | TNIP2(dist=26321), SH3BP2(dist=10326)               | intergenic     |
| 14 | 56882008  | C | A | rs79996380  | 6.94E-01 | 0.042 | 0.040 | 1.07 | 0.71 | -1.61 | 3.85E-05 | 0.056 | 0.025 | 2.32 | 1.52 | -3.55 | 1.66 | 7.01E-03 | PEL12(dist=113977), TMEM260(dist=164503)            | intergenic     |
| 10 | 56303319  | G | T | rs1219786   | 4.77E-05 | 0.054 | 0.099 | 1.95 | 1.38 | -2.76 | 6.99E-01 | 0.120 | 0.115 | 0.95 | 0.71 | -1.27 | 1.36 | 7.05E-03 | PCDH15                                              | intronic       |
| 1  | 204967186 | A | T | rs35068223  | 8.82E-01 | 0.117 | 0.112 | 1.04 | 0.81 | -1.35 | 2.98E-05 | 0.163 | 0.116 | 1.47 | 1.14 | -1.9  | 1.38 | 7.06E-03 | NFASC                                               | intronic       |
| 10 | 74089364  | C | T | rs9415064   | 9.79E-01 | 0.150 | 0.134 | 1.14 | 0.91 | -1.44 | 5.71E-05 | 0.231 | 0.174 | 1.43 | 1.15 | -1.79 | 1.30 | 7.11E-03 | DDIT4(dist=53567), DNAJB12(dist=3224)               | intergenic     |
| 17 | 52177432  | A | G | rs143493092 | 2.57E-05 | 0.057 | 0.029 | 2.00 | 1.37 | -2.93 | 4.70E-01 | 0.037 | 0.041 | 0.90 | 0.55 | -1.47 | 1.63 | 7.12E-03 | KIF2B(dist=274859), TOM1L1(dist=800620)             | intergenic     |
| 4  | 16965779  | C | T | rs76249071  | 6.04E-05 | 0.147 | 0.100 | 1.56 | 1.23 | -1.97 | 6.03E-01 | 0.099 | 0.102 | 0.97 | 0.71 | -1.32 | 1.33 | 7.12E-03 | LD82(dist=65347), LOC101929123(dist=207601)         | intergenic     |
| 1  | 161853097 | T | G | rs7414603   | 5.23E-05 | 0.087 | 0.044 | 2.08 | 1.53 | -2.85 | 8.44E-01 | 0.066 | 0.073 | 0.90 | 0.62 | -1.31 | 1.46 | 7.19E-03 | ATF6                                                | intronic       |
| 7  | 67325438  | A | T | rs144738368 | 6.92E-01 | 0.026 | 0.023 | 1.11 | 0.66 | -1.87 | 7.41E-07 | 0.043 | 0.021 | 2.12 | 1.32 | -3.41 | 1.95 | 7.23E-03 | LINC01372(dist=520426), LOC102723427(dist=159802)   | intergenic     |
| 15 | 83435440  | A | G | rs137885987 | 4.49E-01 | 0.028 | 0.033 | 0.84 | 0.51 | -1.37 | 2.10E-07 | 0.075 | 0.036 | 2.18 | 1.51 | -3.15 | 1.69 | 7.27E-03 | FSD2                                                | intronic       |
| 15 | 94628996  | G | A | rs114423641 | 6.40E-01 | 0.045 | 0.044 | 1.02 | 0.69 | -1.51 | 5.32E-06 | 0.062 | 0.034 | 1.85 | 1.24 | -2.76 | 1.78 | 7.28E-03 | LINC01581                                           | ncRNA_intronic |
| 16 | 26429666  | C | T | rs12919702  | 5.25E-05 | 0.106 | 0.062 | 1.81 | 1.37 | -2.39 | 6.84E-01 | 0.077 | 0.087 | 0.87 | 0.62 | -1.24 | 1.40 | 7.32E-03 | HS3ST4(dist=280657), C16orf82(dist=648553)          | ncRNA_intronic |
| 8  | 139211338 | C | T | rs115512919 | 9.47E-01 | 0.091 | 0.094 | 0.97 | 0.73 | -1.29 | 1.69E-05 | 0.133 | 0.076 | 1.88 | 1.42 | -2.5  | 1.37 | 7.32E-03 | FAM135B                                             | intronic       |
| 8  | 9177341   | A | T | rs75117099  | 6.77E-01 | 0.023 | 0.022 | 1.06 | 0.62 | -1.82 | 5.24E-05 | 0.047 | 0.022 | 2.21 | 1.4  | -3.5  | 1.88 | 7.33E-03 | LOC101929128(dist=116975), LOC157273(dist=5220)     | intergenic     |
| 1  | 30411209  | T | C | rs12080843  | 9.67E-01 | 0.340 | 0.345 | 0.98 | 0.83 | -1.16 | 3.48E-05 | 0.258 | 0.340 | 0.67 | 0.55 | -0.83 | 0.83 | 7.36E-03 | LOC101928460(dist=734583), LOC101929406(dist=75590) | intergenic     |
| 2  | 77978288  | A | G | rs148276276 | 4.64E-01 | 0.024 | 0.030 | 0.81 | 0.48 | -1.36 | 1.12E-07 | 0.068 | 0.027 | 2.61 | 1.77 | -3.85 | 1.69 | 7.38E-03 | LOC101927967                                        | ncRNA_intronic |
| 15 | 83315860  | C | T | rs57217657  | 8.72E-01 | 0.255 | 0.265 | 0.95 | 0.79 | -1.15 | 1.34E-05 | 0.346 | 0.253 | 1.56 | 1.28 | -1.9  | 1.22 | 7.38E-03 | CPEB1                                               | intronic       |
| 6  | 84721833  | C | T | rs149906956 | 5.88E-01 | 0.017 | 0.021 | 0.79 | 0.42 | -1.46 | 1.21E-06 | 0.053 | 0.022 | 2.49 | 1.61 | -3.84 | 1.98 | 7.42E-03 | CYB5R4(dist=51687), MRAP2(dist=21587)               | intergenic     |
| 3  | 4300803   | G | T | rs185176951 | 7.85E-01 | 0.024 | 0.022 | 1.13 | 0.66 | -1.92 | 3.84E-05 | 0.046 | 0.024 | 1.94 | 1.22 | -3.08 | 2.02 | 7.43E-03 | LRRN1(dist=411416), SETMAR(dist=44185)              | intergenic     |
| 17 | 52178066  | T | A | rs116712939 | 2.34E-05 | 0.057 | 0.029 | 2.00 | 1.37 | -2.93 | 4.49E-01 | 0.037 | 0.042 | 0.89 | 0.54 | -1.45 | 1.62 | 7.46E-03 | KIF2B(dist=275493), TOM1L1(dist=799986)             | intergenic     |
| 12 | 31286480  | T | C | rs3844572   | 6.62E-01 | 0.138 | 0.146 | 1.07 | 0.85 | -1.36 | 8.57E-06 | 0.229 | 0.151 | 0.60 | 0.48 | -0.75 | 0.77 | 7.46E-03 | DDX11(dist=28755), FAM60A(dist=147040)              | intergenic     |
| 15 | 60112588  | T | C | rs7183476   | 5.05E-05 | 0.043 | 0.024 | 1.88 | 1.22 | -2.88 | 7.59E-01 | 0.032 | 0.033 | 0.98 | 0.57 | -1.66 | 1.84 | 7.50E-03 | BNIP2(dist=130946), FOXB1(dist=183833)              | intergenic     |
| 12 | 106606870 | G | T | rs1236963   | 9.22E-01 | 0.127 | 0.124 | 0.97 | 0.76 | -1.24 | 5.70E-05 | 0.190 | 0.128 | 0.63 | 0.49 | -0.8  | 0.77 | 7.52E-03 | NUAK1(dist=73059), CKAP4(dist=24789)                | intergenic     |
| 2  | 236822295 | T | C | rs141788576 | 9.47E-01 | 0.029 | 0.030 | 0.98 | 0.61 | -1.59 | 5.99E-07 | 0.048 | 0.024 | 2.05 | 1.3  | -3.21 | 2.03 | 7.57E-03 | AGAP1                                               | intronic       |
| 15 | 83246039  | G | A | rs114348642 | 3.09E-01 | 0.034 | 0.043 | 0.80 | 0.51 | -1.24 | 3.03E-09 | 0.081 | 0.040 | 2.11 | 1.48 | -3.01 | 1.69 | 7.62E-03 | CPEB1                                               | intronic       |
| 6  | 165704050 | A | G | rs114107378 | 7.14E-01 | 0.050 | 0.047 | 1.07 | 0.74 | -1.56 | 4.35E-05 | 0.074 | 0.038 | 2.02 | 1.4  | -2.92 | 1.59 | 7.64E-03 | C6orf118                                            | intronic       |
| 17 | 52176961  | G | A | rs79860372  | 2.96E-05 | 0.057 | 0.030 | 1.99 | 1.36 | -2.9  | 4.67E-01 | 0.037 | 0.041 | 0.90 | 0.55 | -1.46 | 1.62 | 7.64E-03 | KIF2B(dist=274388), TOM1L1(dist=801091)             | intergenic     |
| 17 | 52170992  | A | G | rs114092167 | 2.99E-05 | 0.057 | 0.030 | 1.99 | 1.36 | -2.9  | 4.67E-01 | 0.037 | 0.041 | 0.90 | 0.55 | -1.46 | 1.62 | 7.65E-03 | KIF2B(dist=268419), TOM1L1(dist=807060)             | intergenic     |
| 17 | 52172929  | G | T | rs115822520 | 2.98E-05 | 0.057 | 0.030 | 1.99 | 1.36 | -2.9  | 4.67E-01 | 0.037 | 0.041 | 0.90 | 0.55 | -1.46 | 1.62 | 7.66E-03 | KIF2B(dist=270356), TOM1L1(dist=805123)             | intergenic     |
| 15 | 83325128  | G | A | rs148181809 | 2.69E-01 | 0.031 | 0.039 | 0.78 | 0.49 | -1.23 | 1.61E-08 | 0.083 | 0.038 | 2.27 | 1.59 | -3.22 | 1.63 | 7.67E-03 | CPEB1-AS1                                           | ncRNA_intronic |
| 6  | 14044389  | G | A | rs142100118 | 4.69E-01 | 0.054 | 0.051 | 1.06 | 0.74 | -1.53 | 3.23E-05 | 0.064 | 0.037 | 1.78 | 1.2  | -2.63 | 1.70 | 7.71E-03 | RNF182(dist=64149), CD83(dist=73098)                | intergenic     |
| 9  | 91145941  | C | C | rs147865921 | 9.19E-01 | 0.055 | 0.056 | 0.98 | 0.69 | -1.4  | 1.06E-05 | 0.082 | 0.044 | 1.95 | 1.37 | -2.77 | 1.57 | 7.72E-03 | SPIN1(dist=52319), NXN2L2(dist=4075)                | intergenic     |
| 15 | 41167452  | C | T | rs114077707 | 5.51E-05 | 0.046 | 0.023 | 2.05 | 1.34 | -3.13 | 3.52E-01 | 0.020 | 0.025 | 0.82 | 0.43 | -1.59 | 1.89 | 7.81E-03 | RHOV                                                | upstream       |
| 18 | 308089    | T | C | rs647533    | 6.10E-05 | 0.505 | 0.418 | 1.42 | 1.21 | -1.67 | 5.35E-01 | 0.440 | 0.460 | 0.92 | 0.77 | -1.11 | 1.19 | 7.83E-03 | THOC1(dist=40030), COLEC12(dist=11266)              | intergenic     |
| 10 | 74125582  | A | G | rs9416019   | 9.53E-01 | 0.474 | 0.480 | 1.02 | 0.87 | -1.2  | 3.65E-05 | 0.415 | 0.505 | 1.44 | 1.19 | -1.74 | 1.20 | 7.92E-03 | DNAJB12(dist=10675), MICU1(dist=1502)               | intergenic     |
| 2  | 101283148 | A | C | rs149925093 | 6.95E-01 | 0.040 | 0.039 | 1.03 | 0.68 | -1.56 | 2.99E-05 | 0.060 | 0.037 | 1.67 | 1.12 | -2.49 | 1.90 | 7.94E-03 | PDCL3(dist=89947), NPAS2(dist=153465)               | intergenic     |
| 17 | 52191705  | A | G | rs144800298 | 3.20E-05 | 0.056 | 0.029 | 2.01 | 1.37 | -2.95 | 4.86E-01 | 0.037 | 0.041 | 0.90 | 0.55 | -1.48 | 1.62 | 7.94E-03 | KIF2B(dist=289132), TOM1L1(dist=786347)             | intergenic     |
| 7  | 38779688  | C | A | rs114020924 | 7.02E-01 | 0.042 | 0.040 | 1.07 | 0.71 | -1.6  | 5.84E-05 | 0.068 | 0.033 | 2.15 | 1.46 | -3.16 | 1.58 | 7.96E-03 | VPS41                                               | intronic       |
| 1  | 84321093  | T | A | rs12137971  | 9.40E-01 | 0.120 | 0.119 | 1.01 | 0.79 | -1.3  | 4.24E-05 | 0.170 | 0.117 | 1.55 | 1.2  | -1.99 | 1.35 | 8.05E-03 | LOC101927560, LOC101927587, MIR548AP                | ncRNA_intronic |
| 8  | 64101353  | C | T | rs9643559   | 8.44E-01 | 0.073 | 0.072 | 1.01 | 0.74 | -1.38 | 1.57E-06 | 0.115 | 0.064 | 1.92 | 1.42 | -2.59 | 1.42 | 8.06E-03 | YTHDF3                                              | intronic       |
| 14 | 99376263  | G | A | rs148500814 | 4.1      |       |       |      |      |       |          |       |       |      |      |       |      |          |                                                     |                |

|    |           |   |   |                       |          |       |       |      |      |       |          |       |       |      |      |       |      |          |                                                          |                |
|----|-----------|---|---|-----------------------|----------|-------|-------|------|------|-------|----------|-------|-------|------|------|-------|------|----------|----------------------------------------------------------|----------------|
| 17 | 52178973  | T | G | rs143729739           | 3.68E-05 | 0.057 | 0.030 | 1.97 | 1.35 | -2.87 | 4.74E-01 | 0.037 | 0.041 | 0.90 | 0.55 | -1.47 | 1.61 | 8.22E-03 | KIF2B(dist=276400), TOM1L1(dist=799079)                  | intergenic     |
| 17 | 52186979  | A | G | rs140074025           | 3.69E-05 | 0.057 | 0.030 | 1.97 | 1.35 | -2.87 | 4.74E-01 | 0.037 | 0.041 | 0.90 | 0.55 | -1.47 | 1.61 | 8.23E-03 | KIF2B(dist=284406), TOM1L1(dist=791073)                  | intergenic     |
| 19 | 52796603  | T | C | rs113614116           | 9.75E-01 | 0.108 | 0.107 | 1.01 | 0.78 | -1.32 | 4.45E-05 | 0.162 | 0.105 | 1.65 | 1.28 | -2.14 | 1.32 | 8.27E-03 | ZNF766                                                   | downstream     |
| 4  | 70793480  | C | T | rs144005221           | 9.93E-01 | 0.028 | 0.027 | 1.02 | 0.62 | -1.68 | 1.56E-05 | 0.050 | 0.023 | 2.24 | 1.44 | -3.5  | 1.77 | 8.28E-03 | SULT1E1(dist=67610), CSN1S1(dist=3319)                   | intergenic     |
| 12 | 31284616  | C | T | rs10771806            | 8.49E-01 | 0.161 | 0.167 | 1.04 | 0.84 | -1.3  | 3.56E-05 | 0.241 | 0.169 | 0.64 | 0.51 | -0.8  | 0.77 | 8.33E-03 | DDX11(dist=26891), FAM60A(dist=148904)                   | intergenic     |
| 12 | 31288884  | G | T | rs4931444             | 7.55E-01 | 0.147 | 0.154 | 1.06 | 0.84 | -1.33 | 2.01E-05 | 0.230 | 0.154 | 0.61 | 0.49 | -0.76 | 0.77 | 8.34E-03 | DDX11(dist=31159), FAM60A(dist=144636)                   | intergenic     |
| 8  | 60460074  | A | G | rs7357459             | 9.82E-01 | 0.225 | 0.229 | 1.02 | 0.84 | -1.24 | 8.05E-06 | 0.280 | 0.195 | 0.62 | 0.5  | -0.77 | 0.81 | 8.40E-03 | TOX(dist=428307), CA8(dist=641349)                       | intergenic     |
| 9  | 71830193  | A | C | rs2252949             | 7.48E-01 | 0.155 | 0.149 | 0.96 | 0.76 | -1.2  | 5.7E-05  | 0.185 | 0.126 | 0.64 | 0.5  | -0.82 | 0.77 | 8.41E-03 | TJP2                                                     | intronic       |
| 6  | 53511224  | T | C | rs60969333            | 9.65E-01 | 0.027 | 0.024 | 1.15 | 0.7  | -1.91 | 4.48E-06 | 0.054 | 0.031 | 1.78 | 1.16 | -2.72 | 1.89 | 8.43E-03 | LINC01564(dist=15032), KLHL31(dist=1475)                 | intergenic     |
| 1  | 60090449  | A | G | rs116539594           | 9.95E-01 | 0.087 | 0.089 | 0.98 | 0.73 | -1.3  | 4.44E-05 | 0.137 | 0.082 | 1.78 | 1.35 | -2.34 | 1.35 | 8.44E-03 | FGGY                                                     | intronic       |
| 17 | 38990408  | T | C | rs116794251           | 7.24E-01 | 0.032 | 0.038 | 0.85 | 0.54 | -1.34 | 5.84E-06 | 0.074 | 0.034 | 2.25 | 1.55 | -3.26 | 1.60 | 8.47E-03 | TMEM99                                                   | intronic       |
| 4  | 92120935  | T | A | rs372856010;rs4692962 | 7.68E-01 | 0.367 | 0.365 | 1.01 | 0.85 | -1.19 | 1.18E-05 | 0.439 | 0.355 | 1.42 | 1.18 | -1.72 | 1.21 | 8.51E-03 | CCSER1                                                   | intronic       |
| 4  | 70764801  | C | A | rs72852625            | 9.98E-01 | 0.028 | 0.028 | 1.02 | 0.62 | -1.66 | 2.47E-05 | 0.051 | 0.024 | 2.23 | 1.43 | -3.45 | 1.74 | 8.54E-03 | SULT1E1(dist=38931), CSN1S1(dist=31998)                  | intergenic     |
| 19 | 52795158  | C | T | rs77506493            | 9.54E-01 | 0.108 | 0.107 | 1.01 | 0.78 | -1.31 | 3.88E-05 | 0.161 | 0.104 | 1.65 | 1.28 | -2.14 | 1.32 | 8.54E-03 | ZNF766(NM_001010851:c.707C>T)                            | UTR3           |
| 2  | 151645633 | A | G | rs150165358           | 7.23E-01 | 0.024 | 0.025 | 0.96 | 0.56 | -1.62 | 5.28E-07 | 0.051 | 0.021 | 2.56 | 1.64 | -3.99 | 1.83 | 8.55E-03 | LOC101929282(dist=153762), RBM43(dist=459095)            | intergenic     |
| 3  | 7695991   | C | T | rs7613690             | 5.19E-01 | 0.029 | 0.027 | 1.07 | 0.66 | -1.74 | 6.44E-05 | 0.043 | 0.025 | 1.79 | 1.12 | -2.86 | 1.96 | 8.56E-03 | GRM7                                                     | intronic       |
| 6  | 91006371  | G | A | rs187164707           | 7.48E-01 | 0.019 | 0.021 | 0.90 | 0.5  | -1.62 | 2.66E-05 | 0.050 | 0.023 | 2.22 | 1.42 | -3.47 | 2.06 | 8.59E-03 | BACH2(NM_001170794:c.-287808C>T, NM_021813:c.-287808C>T) | UTR5           |
| 17 | 6869621   | T | C | rs116343500           | 6.58E-06 | 0.059 | 0.029 | 2.08 | 1.43 | -3.03 | 1.13E-01 | 0.016 | 0.026 | 0.62 | 0.3  | -1.28 | 1.67 | 8.62E-03 | KCNJ2(dist=523438), CASC17(dist=394294)                  | intergenic     |
| 4  | 135579300 | A | G | rs116714880           | 8.57E-01 | 0.034 | 0.033 | 1.02 | 0.65 | -1.6  | 1.57E-05 | 0.060 | 0.032 | 1.95 | 1.3  | -2.92 | 1.70 | 8.66E-03 | PABPC4L(dist=456397), LINC00613(dist=1208838)            | intergenic     |
| 4  | 70790597  | C | T | rs111559189           | 9.70E-01 | 0.028 | 0.028 | 1.01 | 0.61 | -1.66 | 1.67E-05 | 0.051 | 0.024 | 2.24 | 1.44 | -3.47 | 1.75 | 8.70E-03 | SULT1E1(dist=64727), CSN1S1(dist=6202)                   | intergenic     |
| 7  | 21992081  | T | C | rs10279289            | 8.28E-01 | 0.049 | 0.048 | 1.03 | 0.71 | -1.51 | 2.23E-05 | 0.069 | 0.033 | 2.15 | 1.47 | -3.16 | 1.56 | 8.71E-03 | CDC47L(dist=6539), RAPGEF5(dist=165827)                  | intergenic     |
| 15 | 38816315  | C | T | rs116101311           | 4.86E-05 | 0.047 | 0.026 | 1.86 | 1.23 | -2.82 | 6.37E-01 | 0.031 | 0.035 | 0.90 | 0.53 | -1.54 | 1.83 | 8.74E-03 | RASGRP1                                                  | intronic       |
| 9  | 137411026 | C | G | rs73564046            | 7.46E-01 | 0.048 | 0.047 | 1.01 | 0.69 | -1.48 | 6.11E-05 | 0.067 | 0.033 | 2.09 | 1.42 | -3.07 | 1.58 | 8.77E-03 | RXRA(dist=78594), COL5A1(dist=122625)                    | intergenic     |
| 18 | 21886948  | C | G | rs2337960             | 4.73E-01 | 0.049 | 0.046 | 1.08 | 0.74 | -1.58 | 6.47E-05 | 0.053 | 0.026 | 2.07 | 1.35 | -3.19 | 1.63 | 8.78E-03 | OSBPL1A                                                  | intronic       |
| 9  | 80116661  | C | T | rs62571537            | 3.65E-06 | 0.058 | 0.026 | 2.28 | 1.55 | -3.34 | 4.42E-01 | 0.036 | 0.046 | 0.78 | 0.48 | -1.29 | 1.70 | 8.78E-03 | GNA14-AS1                                                | ncRNA_intronic |
| 4  | 135583812 | G | A | rs142983573           | 8.51E-01 | 0.034 | 0.033 | 1.03 | 0.65 | -1.61 | 1.89E-05 | 0.060 | 0.032 | 1.94 | 1.3  | -2.92 | 1.69 | 8.80E-03 | PABPC4L(dist=460909), LINC00613(dist=1204326)            | intergenic     |
| 6  | 55058551  | G | A | rs138388179           | 7.87E-01 | 0.026 | 0.025 | 1.04 | 0.62 | -1.74 | 4.12E-05 | 0.048 | 0.023 | 2.13 | 1.36 | -3.36 | 1.94 | 8.81E-03 | HCRTR2                                                   | intronic       |
| 19 | 52796044  | A | G | rs10413233            | 9.50E-01 | 0.108 | 0.107 | 1.01 | 0.78 | -1.31 | 4.20E-05 | 0.162 | 0.105 | 1.65 | 1.28 | -2.14 | 1.32 | 8.82E-03 | ZNF766                                                   | downstream     |
| 15 | 87386455  | C | T | rs78168219            | 4.17E-05 | 0.068 | 0.041 | 1.70 | 1.21 | -2.38 | 5.46E-01 | 0.039 | 0.043 | 0.90 | 0.56 | -1.46 | 1.61 | 8.83E-03 | AGBL1                                                    | intronic       |
| 7  | 38781558  | C | T | rs80031278            | 7.31E-01 | 0.042 | 0.040 | 1.06 | 0.7  | -1.59 | 5.91E-05 | 0.068 | 0.033 | 2.15 | 1.46 | -3.16 | 1.57 | 8.83E-03 | VP541                                                    | intronic       |
| 7  | 124940614 | A | G | rs114834624           | 6.75E-01 | 0.029 | 0.026 | 1.10 | 0.67 | -1.8  | 3.02E-06 | 0.041 | 0.021 | 2.03 | 1.25 | -3.3  | 2.00 | 8.85E-03 | LOC101928283                                             | ncRNA_intronic |
| 1  | 30411185  | C | T | rs12077537            | 9.32E-01 | 0.345 | 0.347 | 0.99 | 0.84 | -1.18 | 2.88E-05 | 0.259 | 0.343 | 0.67 | 0.54 | -0.83 | 0.84 | 8.86E-03 | LOC101928460(dist=734559), LOC101929406(dist=75614)      | intergenic     |
| 6  | 84705373  | A | C | rs139032136           | 9.44E-01 | 0.029 | 0.031 | 0.93 | 0.57 | -1.51 | 1.93E-06 | 0.056 | 0.056 | 2.36 | 1.54 | -3.61 | 1.79 | 8.86E-03 | CYB5R4(dist=35227), MRAP2(dist=38047)                    | intergenic     |
| 19 | 52793203  | G | A | rs10417958            | 9.51E-01 | 0.107 | 0.106 | 1.01 | 0.78 | -1.31 | 3.39E-05 | 0.158 | 0.102 | 1.65 | 1.27 | -2.14 | 1.33 | 8.89E-03 | ZNF766                                                   | intronic       |
| 4  | 70783153  | A | G | rs72852650            | 9.84E-01 | 0.028 | 0.028 | 1.01 | 0.62 | -1.66 | 2.27E-05 | 0.051 | 0.023 | 2.25 | 1.44 | -3.49 | 1.74 | 8.92E-03 | SULT1E1(dist=57283), CSN1S1(dist=13646)                  | intergenic     |
| 8  | 12323247  | T | G | rs741805              | 3.87E-05 | 0.153 | 0.099 | 1.65 | 1.31 | -2.09 | 4.34E-01 | 0.111 | 0.127 | 0.86 | 0.64 | -1.15 | 1.32 | 8.94E-03 | ERICH1-AS1(dist=145470), LOC286083(dist=11047)           | intergenic     |
| 8  | 60445734  | A | G | rs2139231             | 9.93E-01 | 0.060 | 0.057 | 0.94 | 0.67 | -1.33 | 5.01E-05 | 0.123 | 0.079 | 0.61 | 0.46 | -0.82 | 0.69 | 8.98E-03 | TOX(dist=413967), CA8(dist=655689)                       | intergenic     |
| 17 | 52170552  | C | G | rs145087294           | 4.14E-05 | 0.057 | 0.030 | 1.96 | 1.34 | -2.86 | 4.64E-01 | 0.037 | 0.041 | 0.89 | 0.55 | -1.46 | 1.60 | 9.00E-03 | KIF2B(dist=267979), TOM1L1(dist=807500)                  | intergenic     |
| 5  | 30360173  | C | T | rs181958178           | 9.64E-01 | 0.041 | 0.042 | 0.98 | 0.65 | -1.48 | 1.16E-05 | 0.061 | 0.032 | 1.96 | 1.31 | -2.93 | 1.71 | 9.09E-03 | LINC01929681(dist=964090), CDH6(dist=833589)             | intergenic     |
| 7  | 54589183  | G | T | rs191680074           | 9.11E-01 | 0.039 | 0.041 | 0.94 | 0.62 | -1.43 | 2.07E-05 | 0.079 | 0.036 | 2.30 | 1.6  | -3.3  | 1.53 | 9.14E-03 | LINC01445(dist=171645), VSTM2A(dist=20835)               | intergenic     |
| 5  | 168581215 | C | T | rs145676500           | 8.32E-01 | 0.044 | 0.048 | 0.93 | 0.63 | -1.38 | 8.24E-06 | 0.075 | 0.040 | 1.97 | 1.37 | -2.84 | 1.61 | 9.15E-03 | SLIT3                                                    | intronic       |
| 4  | 101086247 | C | A | rs72686282            | 5.00E-05 | 0.068 | 0.031 | 2.27 | 1.59 | -3.24 | 4.76E-01 | 0.045 | 0.061 | 0.73 | 0.47 | -1.15 | 1.55 | 9.17E-03 | LOC256880(dist=127385), DDIT4L(dist=20780)               | intergenic     |
| 4  | 70774701  | T | C | rs72852645            | 9.84E-01 | 0.028 | 0.028 | 1.01 | 0.62 | -1.66 | 2.66E-05 | 0.051 | 0.024 | 2.22 | 1.43 | -3.45 | 1.73 | 9.25E-03 | SULT1E1(dist=48831), CSN1S1(dist=22098)                  | intergenic     |
| 1  | 30411772  | T | C | rs536261431;rs1104698 | 9.18E-01 | 0.346 | 0.347 | 0.99 | 0.84 | -1.18 | 2.90E-05 | 0.260 | 0.343 | 0.67 | 0.54 | -0.83 | 0.84 | 9.25E-03 | LOC101928460(dist=735146), LOC101929406(dist=75027)      | intergenic     |
| 3  | 88820655  | A | T | rs76240016            | 9.50E-01 | 0.174 | 0.175 | 1.01 | 0.81 | -1.25 | 6.11E-05 | 0.231 | 0.181 | 0.73 | 0.59 | -0.92 | 0.75 | 9.27E-03 | C3orf38(dist=613540), EPHA3(dist=336019)                 | intergenic     |
| 9  | 126929239 | C | T | rs75876406            | 3.06E-05 | 0.171 | 0.119 | 1.53 | 1.22 | -1.91 | 3.36E-01 | 0.100 | 0.111 | 0.90 | 0.66 | -1.22 | 1.31 | 9.29E-03 | LHX2(dist=133797), NEK6(dist=90646)                      | intergenic     |
| 1  | 30411910  | C | A | rs12071310            | 9.13E-01 | 0.346 | 0.348 | 0.99 | 0.84 | -1.18 | 2.88E-05 | 0.260 | 0.344 | 0.67 | 0.54 | -0.83 | 0.84 | 9.36E-03 | LOC101928460(dist=735284), LOC101929406(dist=74889)      | intergenic     |
| 16 | 26461706  | C | A | rs72786065            | 2.34E-05 | 0.111 | 0.064 | 1.81 | 1.38 | -2.38 | 5.01E-01 | 0.076 | 0.089 | 0.84 | 0.59 | -1.2  | 1.38 | 9.39E-03 | HS3ST4(dist=312697), C16orf82(dist=616513)               | intergenic     |
| 19 | 44959866  | A | C | rs1734622             | 2.39E-05 | 0.184 | 0.119 | 1.67 | 1.34 | -2.08 | 3.62E-01 | 0.125 | 0.147 | 0.83 | 0.63 | -1.1  | 1.29 | 9.43E-03 | ZNF229(dist=7100), ZNF180(dist=18779)                    | intergenic     |
| 14 | 22637972  | C | T | rs72686499            | 9.83E-01 | 0.131 | 0.126 | 1.05 | 0.82 | -1.34 | 5.74E-05 | 0.187 | 0.134 | 1.48 | 1.16 | -1.89 | 1.32 | 9.44E-03 | OR4E2(dist=503734), DAD1(dist=395835)                    | intergenic     |
| 16 | 80819360  | G | C | rs139516475           | 9.01E-01 | 0.046 | 0.047 | 0.98 | 0.67 | -1.45 | 1.42E-05 | 0.073 | 0.039 | 1.93 | 1.33 | -2.79 | 1.57 | 9.46E-03 | CDYL2                                                    | intronic       |
| 4  | 79398347  | C | T | rs10001798            | 9.44E-01 | 0.087 | 0.076 | 1.16 | 0.86 | -1.55 | 5.89E-05 | 0.121 | 0.084 | 1.51 | 1.13 | -2.02 | 1.39 | 9.51E-03 | FRAS1                                                    | intronic       |
| 15 | 68627796  | C | G | rs76575969            | 8.11E-01 | 0.050 | 0.055 | 0.91 | 0.63 | -1.31 | 2.26E-05 | 0.095 | 0.052 | 1.91 | 1.38 | -2.65 | 1.50 | 9.60E-03 | ITGA11                                                   | intronic       |
| 4  | 94686582  | A | C | rs13106656            | 7.26E-01 | 0.025 | 0.022 | 0.84 | 0.5  | -1.43 | 3.31E-05 | 0.044 | 0.029 | 0.64 | 0.4  | -1.01 | 0.49 | 9.63E-03 | GRID2                                                    | intronic       |
| 2  | 237586813 | G | A | rs149077843           | 7.43E-01 | 0.040 | 0.039 | 1.03 | 0.68 | -1.56 | 5.79E-08 | 0.047 | 0.023 | 2.12 | 1.35 | -3.36 | 1.80 | 9.69E-03 | ACKR3(dist=95819), COPS8(dist=407271)                    | intergenic     |
| 13 | 97599048  | C | T | rs112262185           | 8.82E-01 | 0.035 | 0.037 | 0.96 | 0.62 | -1.49 | 6.00E-06 | 0.057 | 0.028 | 2.10 | 1.38 | -3.19 | 1.69 | 9.70E-03 | LINC00359                                                |                |

|    |           |   |   |                        |          |       |       |      |      |       |          |       |       |      |      |       |      |          |                                               |                |
|----|-----------|---|---|------------------------|----------|-------|-------|------|------|-------|----------|-------|-------|------|------|-------|------|----------|-----------------------------------------------|----------------|
| 6  | 84714645  | T | A | rs143280776            | 9.59E-01 | 0.027 | 0.029 | 0.93 | 0.56 | -1.54 | 1.03E-05 | 0.056 | 0.026 | 2.23 | 1.46 | -3.4  | 1.79 | 1.00E-02 | CYB5R4(dist=44499), MRAP2(dist=28775)         | intergenic     |
| 10 | 66811630  | C | T | rs185147851            | 9.45E-01 | 0.038 | 0.038 | 0.99 | 0.65 | -1.53 | 5.94E-05 | 0.067 | 0.032 | 2.13 | 1.45 | -3.14 | 1.62 | 1.00E-02 | ANXA2P3(dist=224996), LINC01515(dist=519553)  | intergenic     |
| 6  | 43664960  | G | C | rs138608909            | 3.33E-05 | 0.102 | 0.067 | 1.58 | 1.2  | -2.1  | 4.07E-01 | 0.044 | 0.049 | 0.89 | 0.56 | -1.4  | 1.50 | 1.01E-02 | MRPS18A(dist=9411), VEGFA(dist=72986)         | intergenic     |
| 17 | 38986213  | G | A | rs115976837            | 7.16E-01 | 0.032 | 0.038 | 0.85 | 0.54 | -1.33 | 7.26E-06 | 0.073 | 0.034 | 2.23 | 1.54 | -3.24 | 1.59 | 1.01E-02 | TMEM99                                        | intronic       |
| 19 | 52791381  | C | A | rs10416290             | 9.90E-01 | 0.177 | 0.176 | 1.00 | 0.81 | -1.24 | 1.82E-05 | 0.235 | 0.167 | 1.52 | 1.22 | -1.91 | 1.26 | 1.01E-02 | ZNF766                                        | intronic       |
| 10 | 84459237  | G | A | rs1813838              | 9.46E-01 | 0.034 | 0.031 | 1.10 | 0.7  | -1.74 | 3.54E-05 | 0.055 | 0.030 | 1.88 | 1.24 | -2.87 | 1.86 | 1.01E-02 | NR3                                           | intronic       |
| 17 | 52169224  | C | T | rs181372508            | 5.18E-05 | 0.057 | 0.030 | 1.94 | 1.33 | -2.83 | 4.60E-01 | 0.037 | 0.042 | 0.89 | 0.55 | -1.46 | 1.59 | 1.01E-02 | KIF2B(dist=266651), TOM1L1(dist=808828)       | intergenic     |
| 4  | 16991724  | C | T | rs147016112            | 3.67E-05 | 0.058 | 0.035 | 1.68 | 1.16 | -2.42 | 5.04E-01 | 0.031 | 0.035 | 0.89 | 0.52 | -1.52 | 1.77 | 1.02E-02 | LDB2(dist=91292), LOC101929123(dist=181656)   | intergenic     |
| 8  | 60460884  | T | C | rs2467606              | 8.55E-01 | 0.054 | 0.054 | 0.99 | 0.69 | -1.41 | 1.31E-05 | 0.113 | 0.068 | 0.57 | 0.42 | -0.78 | 0.69 | 1.02E-02 | TOX(dist=429117), CA8(dist=640539)            | intergenic     |
| 19 | 52793171  | G | A | rs10417937             | 9.42E-01 | 0.185 | 0.186 | 0.99 | 0.81 | -1.23 | 1.44E-05 | 0.242 | 0.174 | 1.52 | 1.22 | -1.89 | 1.26 | 1.02E-02 | ZNF766                                        | intronic       |
| 10 | 68309012  | C | G | rs116846476            | 7.72E-01 | 0.033 | 0.030 | 1.10 | 0.69 | -1.74 | 4.29E-05 | 0.073 | 0.046 | 1.65 | 1.15 | -2.38 | 1.77 | 1.02E-02 | CTNNA3                                        | intronic       |
| 12 | 31306264  | C | T | rs1844985              | 6.58E-01 | 0.156 | 0.165 | 1.07 | 0.86 | -1.34 | 1.17E-05 | 0.236 | 0.158 | 0.61 | 0.49 | -0.76 | 0.78 | 1.02E-02 | DDX11(dist=48539), FAM60A(dist=127256)        | intergenic     |
| 7  | 38786671  | C | G | rs116390160            | 7.75E-01 | 0.042 | 0.040 | 1.05 | 0.7  | -1.57 | 6.06E-05 | 0.068 | 0.033 | 2.15 | 1.46 | -3.16 | 1.55 | 1.02E-02 | VPS41                                         | intronic       |
| 3  | 16590309  | A | T | rs73138692             | 1.46E-05 | 0.054 | 0.027 | 2.05 | 1.39 | -3.03 | 2.79E-01 | 0.022 | 0.029 | 0.76 | 0.4  | -1.43 | 1.66 | 1.02E-02 | LINC00690(dist=7429), DAZL(dist=37992)        | intergenic     |
| 15 | 33849528  | C | T | rs3829474              | 7.92E-01 | 0.134 | 0.133 | 1.01 | 0.79 | -1.28 | 1.56E-05 | 0.199 | 0.136 | 1.58 | 1.24 | -2    | 1.28 | 1.03E-02 | RYR3                                          | intronic       |
| 7  | 124934685 | T | C | rs57609493             | 7.06E-01 | 0.029 | 0.027 | 1.09 | 0.67 | -1.77 | 4.15E-06 | 0.042 | 0.021 | 2.00 | 1.23 | -3.25 | 1.98 | 1.03E-02 | LOC101928283                                  | ncRNA_intronic |
| 7  | 38786949  | T | A | rs114639121            | 7.78E-01 | 0.042 | 0.040 | 1.04 | 0.69 | -1.57 | 6.08E-05 | 0.068 | 0.033 | 2.15 | 1.46 | -3.16 | 1.55 | 1.03E-02 | VPS41                                         | intronic       |
| 3  | 16590334  | G | A | rs73138694             | 1.27E-05 | 0.054 | 0.027 | 2.06 | 1.39 | -3.05 | 2.64E-01 | 0.022 | 0.028 | 0.75 | 0.4  | -1.43 | 1.66 | 1.04E-02 | LINC00690(dist=7454), DAZL(dist=37967)        | intergenic     |
| 1  | 53910444  | G | A | rs146667529            | 9.18E-01 | 0.025 | 0.027 | 0.90 | 0.53 | -1.52 | 3.22E-05 | 0.054 | 0.023 | 2.36 | 1.53 | -3.64 | 1.72 | 1.04E-02 | SLC25A3P1(dist=4751), DMRTB1(dist=14628)      | intergenic     |
| 1  | 53910997  | G | A | rs146013270            | 9.18E-01 | 0.025 | 0.027 | 0.90 | 0.53 | -1.52 | 3.25E-05 | 0.054 | 0.023 | 2.36 | 1.53 | -3.64 | 1.72 | 1.05E-02 | SLC25A3P1(dist=5304), DMRTB1(dist=14075)      | intergenic     |
| 1  | 53910947  | A | T | rs149107362            | 9.17E-01 | 0.025 | 0.027 | 0.90 | 0.53 | -1.52 | 3.25E-05 | 0.054 | 0.023 | 2.36 | 1.53 | -3.64 | 1.72 | 1.05E-02 | SLC25A3P1(dist=5254), DMRTB1(dist=14125)      | intergenic     |
| 15 | 83246886  | T | C | rs8028363              | 6.10E-01 | 0.246 | 0.262 | 0.92 | 0.76 | -1.11 | 3.09E-06 | 0.337 | 0.242 | 1.59 | 1.31 | -1.95 | 1.21 | 1.05E-02 | CPEB1                                         | intronic       |
| 12 | 84451716  | G | A | rs115357944            | 7.71E-01 | 0.019 | 0.021 | 0.88 | 0.49 | -1.6  | 5.03E-05 | 0.051 | 0.022 | 2.37 | 1.52 | -3.7  | 1.77 | 1.05E-02 | TMTCC2(dist=923649), SLC6A15(dist=801551)     | intergenic     |
| 6  | 133593583 | C | T | rs79248628             | 3.73E-05 | 0.124 | 0.084 | 1.54 | 1.19 | -1.99 | 5.79E-01 | 0.082 | 0.085 | 0.96 | 0.68 | -1.34 | 1.37 | 1.05E-02 | EYA4                                          | intronic       |
| 18 | 6733041   | C | T | rs9949697              | 8.54E-01 | 0.114 | 0.118 | 0.96 | 0.74 | -1.24 | 8.57E-06 | 0.146 | 0.094 | 1.65 | 1.26 | -2.16 | 1.35 | 1.05E-02 | LINC01387(dist=142389), ARHGAP28(dist=101391) | intergenic     |
| 1  | 53912803  | C | T | rs114018740            | 9.17E-01 | 0.025 | 0.027 | 0.90 | 0.53 | -1.52 | 3.34E-05 | 0.054 | 0.024 | 2.36 | 1.53 | -3.63 | 1.72 | 1.06E-02 | SLC25A3P1(dist=7110), DMRTB1(dist=12269)      | intergenic     |
| 17 | 3763434   | G | A | rs386794673;rs73974141 | 6.48E-01 | 0.092 | 0.090 | 1.02 | 0.77 | -1.35 | 5.20E-05 | 0.103 | 0.066 | 1.62 | 1.18 | -2.21 | 1.45 | 1.06E-02 | CAMKK1                                        | downstream     |
| 12 | 53855753  | A | C | rs75094421             | 9.11E-01 | 0.030 | 0.031 | 0.94 | 0.58 | -1.52 | 2.30E-05 | 0.058 | 0.027 | 2.24 | 1.48 | -3.38 | 1.70 | 1.06E-02 | PCBP2                                         | intronic       |
| 14 | 63658934  | G | A | rs79163370             | 6.81E-01 | 0.053 | 0.059 | 0.90 | 0.63 | -1.29 | 7.12E-06 | 0.101 | 0.054 | 1.96 | 1.43 | -2.7  | 1.45 | 1.06E-02 | KCNH5(dist=146978), RHOJ(dist=12168)          | intergenic     |
| 13 | 106426186 | T | C | rs7699972              | 9.74E-01 | 0.087 | 0.091 | 0.96 | 0.72 | -1.28 | 4.74E-05 | 0.130 | 0.081 | 1.70 | 1.28 | -2.26 | 1.40 | 1.07E-02 | LINC00343(dist=12041), LINC00460(dist=602725) | intergenic     |
| 1  | 53913443  | A | G | rs114225380            | 9.14E-01 | 0.025 | 0.027 | 0.90 | 0.53 | -1.51 | 3.36E-05 | 0.054 | 0.024 | 2.35 | 1.53 | -3.63 | 1.72 | 1.07E-02 | SLC25A3P1(dist=7750), DMRTB1(dist=11629)      | intergenic     |
| 3  | 166768513 | T | C | rs2203921              | 5.64E-05 | 0.194 | 0.133 | 0.64 | 0.52 | -0.79 | 4.22E-01 | 0.136 | 0.153 | 1.14 | 0.87 | -1.5  | 0.79 | 1.09E-02 | BCHE(dist=1213260), ZBBX(dist=189564)         | intergenic     |
| 19 | 52790601  | G | A | rs10409722             | 9.59E-01 | 0.175 | 0.175 | 1.00 | 0.81 | -1.24 | 1.91E-05 | 0.233 | 0.166 | 1.53 | 1.22 | -1.91 | 1.26 | 1.09E-02 | ZNF766                                        | intronic       |
| 12 | 53892538  | G | A | rs115522261            | 8.61E-01 | 0.030 | 0.032 | 0.93 | 0.58 | -1.49 | 1.28E-05 | 0.058 | 0.027 | 2.22 | 1.47 | -3.37 | 1.71 | 1.09E-02 | MAP3K12                                       | intronic       |
| 18 | 6722050   | C | T | rs7239934              | 8.58E-01 | 0.119 | 0.123 | 0.97 | 0.75 | -1.24 | 9.27E-06 | 0.148 | 0.096 | 1.64 | 1.25 | -2.14 | 1.35 | 1.09E-02 | LINC01387(dist=131398), ARHGAP28(dist=112382) | intergenic     |
| 1  | 15015417  | C | T | rs183187014            | 8.66E-01 | 0.023 | 0.023 | 1.00 | 0.58 | -1.72 | 2.99E-06 | 0.042 | 0.020 | 2.16 | 1.34 | -3.5  | 1.93 | 1.09E-02 | KAZN                                          | intronic       |
| 19 | 52790135  | G | A | rs76334374             | 9.69E-01 | 0.174 | 0.174 | 1.00 | 0.81 | -1.24 | 2.26E-05 | 0.233 | 0.167 | 1.52 | 1.22 | -1.9  | 1.26 | 1.09E-02 | ZNF766                                        | intronic       |
| 12 | 31305317  | G | A | rs7314927              | 5.89E-01 | 0.165 | 0.176 | 1.08 | 0.87 | -1.34 | 9.93E-06 | 0.259 | 0.180 | 0.63 | 0.51 | -0.78 | 0.79 | 1.09E-02 | DDX11(dist=47592), FAM60A(dist=128203)        | intergenic     |
| 2  | 138325140 | A | G | rs115145862            | 9.58E-01 | 0.024 | 0.022 | 1.07 | 0.62 | -1.83 | 2.51E-06 | 0.045 | 0.022 | 2.03 | 1.27 | -3.25 | 1.94 | 1.10E-02 | THSD7B                                        | intronic       |
| 13 | 106422970 | G | A | rs73573184             | 9.74E-01 | 0.091 | 0.095 | 0.96 | 0.72 | -1.27 | 2.21E-05 | 0.132 | 0.080 | 1.76 | 1.33 | -2.33 | 1.37 | 1.11E-02 | LINC00343(dist=8825), LINC00460(dist=605941)  | intergenic     |
| 15 | 83245053  | T | C | rs60160189             | 5.92E-01 | 0.246 | 0.263 | 0.92 | 0.76 | -1.11 | 3.03E-06 | 0.337 | 0.242 | 1.59 | 1.31 | -1.94 | 1.21 | 1.11E-02 | CPEB1                                         | intronic       |
| 1  | 85602412  | T | C | rs1870327              | 8.76E-01 | 0.422 | 0.427 | 0.98 | 0.83 | -1.16 | 4.62E-05 | 0.315 | 0.400 | 0.69 | 0.56 | -0.84 | 0.84 | 1.12E-02 | MIR4423(dist=2856), SYDE2(dist=20944)         | intergenic     |
| 8  | 60467072  | C | G | rs66506970             | 8.46E-01 | 0.055 | 0.055 | 1.01 | 0.71 | -1.45 | 1.32E-05 | 0.112 | 0.068 | 1.73 | 1.28 | -2.34 | 1.44 | 1.12E-02 | TOX(dist=435305), CA8(dist=634351)            | intergenic     |
| 2  | 77990452  | C | G | rs114779192            | 4.21E-01 | 0.023 | 0.029 | 0.79 | 0.46 | -1.35 | 6.02E-07 | 0.066 | 0.027 | 2.52 | 1.7  | -3.74 | 1.66 | 1.13E-02 | LOC101927967                                  | ncRNA_intronic |
| 6  | 104478006 | G | A | rs114379819            | 9.02E-01 | 0.031 | 0.032 | 0.97 | 0.61 | -1.54 | 3.15E-05 | 0.057 | 0.024 | 2.48 | 1.63 | -3.78 | 1.69 | 1.13E-02 | GRIK2(dist=1960048), HACE1(dist=697962)       | intergenic     |
| 16 | 26465489  | G | A | rs62030885             | 1.82E-05 | 0.117 | 0.068 | 1.82 | 1.39 | -2.38 | 3.68E-01 | 0.076 | 0.092 | 0.81 | 0.57 | -1.15 | 1.35 | 1.13E-02 | HS3ST4(dist=316480), C16orf82(dist=612730)    | intergenic     |
| 5  | 2898140   | C | T | rs148609588            | 7.90E-01 | 0.038 | 0.038 | 1.00 | 0.65 | -1.53 | 6.95E-06 | 0.052 | 0.025 | 2.13 | 1.38 | -3.3  | 1.69 | 1.14E-02 | C5orf38(dist=142629), LINC01377(dist=279809)  | intergenic     |
| 13 | 106423845 | G | T | rs61693967             | 9.96E-01 | 0.093 | 0.096 | 0.96 | 0.73 | -1.27 | 3.09E-05 | 0.133 | 0.081 | 1.74 | 1.32 | -2.31 | 1.37 | 1.14E-02 | LINC00343(dist=9700), LINC00460(dist=605066)  | intergenic     |
| 17 | 38958085  | G | A | rs74789156             | 6.65E-01 | 0.033 | 0.039 | 0.84 | 0.53 | -1.31 | 8.47E-06 | 0.072 | 0.034 | 2.22 | 1.53 | -3.23 | 1.59 | 1.14E-02 | KRT28(dist=1874), KRT10(dist=16284)           | intergenic     |
| 19 | 6959356   | C | T | rs12019130             | 9.50E-01 | 0.094 | 0.098 | 0.96 | 0.73 | -1.27 | 2.48E-05 | 0.134 | 0.086 | 1.65 | 1.25 | -2.17 | 1.39 | 1.14E-02 | ADGRE4P                                       | ncRNA_intronic |
| 12 | 53848040  | C | A | rs79796127             | 8.87E-01 | 0.029 | 0.031 | 0.94 | 0.58 | -1.52 | 2.45E-05 | 0.058 | 0.027 | 2.23 | 1.48 | -3.38 | 1.69 | 1.14E-02 | PCBP2                                         | intronic       |
| 2  | 85922468  | T | C | rs6732835              | 9.30E-01 | 0.041 | 0.043 | 0.95 | 0.63 | -1.43 | 2.99E-06 | 0.065 | 0.029 | 2.27 | 1.53 | -3.37 | 1.59 | 1.14E-02 | GNLY                                          | exonic         |
| 12 | 31290802  | C | T | rs2639070              | 5.81E-01 | 0.138 | 0.148 | 1.09 | 0.86 | -1.37 | 1.18E-05 | 0.226 | 0.150 | 0.60 | 0.48 | -0.76 | 0.78 | 1.15E-02 | DDX11(dist=33077), FAM60A(dist=142718)        | intergenic     |
| 16 | 26463332  | C | A | rs62030881             | 1.99E-05 | 0.113 | 0.066 | 1.81 | 1.38 | -2.38 | 4.01E-01 | 0.074 | 0.089 | 0.82 | 0.57 | -1.17 | 1.36 | 1.16E-02 | HS3ST4(dist=314323), C16orf82(dist=614887)    | intergenic     |
| 8  | 60309679  | C | T | rs1464252              | 9.23E-01 | 0.050 | 0.051 | 1.00 | 0.69 | -1.46 | 5.82E-05 | 0.080 | 0.040 | 0.49 | 0.34 | -0.69 | 0.67 | 1.16E-02 | TOX(dist=277912), CA8(dist=791744)            | intergenic     |
| 4  | 158543178 | T | C | rs13146420             | 4.78E-05 | 0.377 | 0.298 | 0.70 | 0.59 | -0.83 | 3.62E-01 | 0.308 | 0.332 | 1.12 | 0.91 | -1.37 | 0.83 | 1.16E-02 | LOC340017(dist=45875), FAM198B(dist=502554)   | intergenic     |
| 2  | 77978932  | C | G | rs141301049            | 4.65E-01 | 0.024 | 0.030 |      |      |       |          |       |       |      |      |       |      |          |                                               |                |



|    |           |   |   |                        |          |       |       |      |      |       |          |       |       |      |      |       |      |          |                                                  |                |
|----|-----------|---|---|------------------------|----------|-------|-------|------|------|-------|----------|-------|-------|------|------|-------|------|----------|--------------------------------------------------|----------------|
| 4  | 2775411   | G | A | rs200251613;rs71608237 | 7.75E-01 | 0.033 | 0.033 | 1.00 | 0.63 | -1.57 | 1.86E-07 | 0.065 | 0.039 | 1.71 | 1.16 | -2.53 | 1.82 | 1.20E-02 | TNIP2(dist=17308), SH3BP2(dist=19339)            | intergenic     |
| 7  | 81819666  | T | C | rs10280131             | 9.74E-01 | 0.052 | 0.055 | 0.93 | 0.65 | -1.35 | 4.12E-05 | 0.085 | 0.048 | 1.84 | 1.3  | -2.6  | 1.55 | 1.20E-02 | CACNA2D1                                         | intronic       |
| 4  | 158552504 | T | A | rs2130671              | 3.96E-05 | 0.443 | 0.360 | 0.71 | 0.6  | -0.84 | 3.27E-01 | 0.357 | 0.380 | 1.10 | 0.91 | -1.34 | 0.84 | 1.21E-02 | LOC340017(dist=55201), FAM198B(dist=493228)      | intergenic     |
| 8  | 138294564 | C | T | rs73394999             | 8.80E-01 | 0.048 | 0.050 | 0.97 | 0.66 | -1.41 | 2.92E-05 | 0.073 | 0.036 | 2.10 | 1.45 | -3.05 | 1.50 | 1.21E-02 | KHDRBS3(dist=1634712), LOC101927915(dist=123780) | intergenic     |
| 4  | 158553107 | A | T | rs1490528              | 2.67E-05 | 0.428 | 0.344 | 0.70 | 0.59 | -0.83 | 2.98E-01 | 0.339 | 0.364 | 1.12 | 0.92 | -1.36 | 0.84 | 1.21E-02 | LOC340017(dist=55804), FAM198B(dist=492625)      | intergenic     |
| 3  | 16590734  | A | T | rs73138699             | 1.30E-05 | 0.054 | 0.027 | 2.06 | 1.39 | -3.05 | 2.32E-01 | 0.021 | 0.028 | 0.73 | 0.38 | -1.39 | 1.64 | 1.21E-02 | LINC00690(dist=7854), DAZL(dist=37567)           | intergenic     |
| 15 | 79421687  | G | C | rs56155719             | 8.73E-01 | 0.203 | 0.211 | 0.95 | 0.78 | -1.17 | 2.79E-05 | 0.282 | 0.202 | 1.55 | 1.26 | -1.91 | 1.22 | 1.22E-02 | SNSGRF1(dist=38472), ANKRD34C-AS1(dist=62362)    | intergenic     |
| 1  | 203972230 | G | A | rs76082887             | 6.49E-01 | 0.101 | 0.098 | 1.03 | 0.78 | -1.35 | 5.33E-05 | 0.113 | 0.072 | 1.64 | 1.21 | -2.21 | 1.39 | 1.22E-02 | RASRF(dist=131950), LINC00303(dist=29345)        | intergenic     |
| 15 | 83183986  | C | A | rs185018922            | 6.84E-01 | 0.354 | 0.371 | 0.93 | 0.78 | -1.1  | 6.32E-06 | 0.422 | 0.329 | 1.49 | 1.23 | -1.8  | 1.21 | 1.23E-02 | GOLGA6L17P                                       | ncRNA_intronic |
| 17 | 52205337  | G | A | rs140573807            | 5.84E-05 | 0.058 | 0.031 | 1.91 | 1.31 | -2.77 | 4.27E-01 | 0.038 | 0.042 | 0.88 | 0.54 | -1.44 | 1.57 | 1.23E-02 | KIF2B(dist=302764), TOM1L1(dist=772715)          | intergenic     |
| 4  | 158550609 | C | T | rs1387994              | 4.12E-05 | 0.442 | 0.360 | 0.71 | 0.6  | -0.84 | 3.29E-01 | 0.357 | 0.380 | 1.10 | 0.91 | -1.34 | 0.84 | 1.23E-02 | LOC340017(dist=53306), FAM198B(dist=495123)      | intergenic     |
| 8  | 19101715  | C | T | rs73667622             | 8.02E-01 | 0.081 | 0.083 | 0.97 | 0.72 | -1.31 | 4.61E-05 | 0.120 | 0.077 | 1.64 | 1.23 | -2.2  | 1.41 | 1.24E-02 | LOC100128993                                     | ncRNA_intronic |
| 6  | 29417571  | G | A | rs11968109             | 6.49E-01 | 0.076 | 0.083 | 0.91 | 0.67 | -1.23 | 1.04E-05 | 0.138 | 0.078 | 1.90 | 1.44 | -2.51 | 1.36 | 1.24E-02 | OR10C1(dist=8817), OR2H1(dist=8659)              | intergenic     |
| 20 | 8221672   | T | G | rs1474937              | 5.26E-01 | 0.355 | 0.368 | 1.06 | 0.89 | -1.26 | 8.16E-06 | 0.442 | 0.356 | 0.70 | 0.58 | -0.84 | 0.82 | 1.24E-02 | PLCB1                                            | intronic       |
| 16 | 84416403  | C | G | rs1975948              | 6.93E-01 | 0.037 | 0.035 | 0.94 | 0.61 | -1.44 | 2.10E-05 | 0.049 | 0.028 | 0.56 | 0.36 | -0.86 | 0.55 | 1.24E-02 | ATP2C2                                           | intronic       |
| 3  | 16590511  | C | T | rs76297927;rs386658882 | 1.27E-05 | 0.054 | 0.027 | 2.06 | 1.39 | -3.05 | 2.27E-01 | 0.021 | 0.028 | 0.72 | 0.38 | -1.39 | 1.64 | 1.25E-02 | LINC00690(dist=7631), DAZL(dist=37790)           | intergenic     |
| 4  | 92128474  | G | A | rs4482729              | 5.06E-01 | 0.375 | 0.382 | 0.97 | 0.82 | -1.15 | 5.03E-06 | 0.468 | 0.369 | 1.51 | 1.25 | -1.82 | 1.18 | 1.25E-02 | CCSER1                                           | intronic       |
| 17 | 15851655  | C | G | rs76392987             | 9.63E-01 | 0.038 | 0.040 | 0.95 | 0.62 | -1.45 | 4.64E-05 | 0.071 | 0.036 | 2.06 | 1.42 | -2.99 | 1.54 | 1.25E-02 | ADORA2B                                          | intronic       |
| 19 | 44959690  | T | C | rs431273               | 2.83E-05 | 0.177 | 0.114 | 1.67 | 1.33 | -2.08 | 2.92E-01 | 0.117 | 0.140 | 0.81 | 0.61 | -1.08 | 1.29 | 1.25E-02 | ZNF229(dist=6924), ZNF180(dist=18955)            | intergenic     |
| 4  | 70806476  | T | C | rs72852688             | 1.00E+00 | 0.029 | 0.029 | 1.01 | 0.62 | -1.64 | 5.43E-05 | 0.051 | 0.024 | 2.18 | 1.4  | -3.39 | 1.68 | 1.26E-02 | CSN1S1                                           | intronic       |
| 4  | 70806612  | G | A | rs72852689             | 1.00E+00 | 0.029 | 0.029 | 1.01 | 0.62 | -1.64 | 5.45E-05 | 0.051 | 0.024 | 2.18 | 1.4  | -3.39 | 1.68 | 1.26E-02 | CSN1S1                                           | intronic       |
| 3  | 25627428  | G | A | rs78932718             | 9.42E-01 | 0.064 | 0.068 | 0.94 | 0.68 | -1.31 | 5.20E-05 | 0.105 | 0.064 | 1.71 | 1.25 | -2.33 | 1.45 | 1.26E-02 | RARB                                             | intronic       |
| 10 | 36132217  | G | A | rs79512962             | 1.58E-05 | 0.044 | 0.023 | 1.96 | 1.28 | -3.01 | 1.09E-02 | 0.040 | 0.026 | 1.57 | 0.97 | -2.55 | 2.56 | 1.26E-02 | LINC01452(dist=42369), ANKRD30A(dist=1282568)    | intergenic     |
| 12 | 31300020  | G | C | rs10734797             | 6.84E-01 | 0.146 | 0.154 | 1.07 | 0.85 | -1.34 | 2.53E-05 | 0.227 | 0.152 | 0.61 | 0.49 | -0.77 | 0.79 | 1.26E-02 | DDX11(dist=42295), FAM60A(dist=133500)           | intergenic     |
| 6  | 29422516  | G | A | rs115047029            | 6.47E-01 | 0.075 | 0.083 | 0.91 | 0.67 | -1.23 | 1.03E-05 | 0.138 | 0.077 | 1.91 | 1.45 | -2.52 | 1.36 | 1.26E-02 | OR10C1(dist=13762), OR2H1(dist=3714)             | intergenic     |
| 12 | 95220573  | C | T | rs7316617              | 4.98E-05 | 0.549 | 0.482 | 0.76 | 0.65 | -0.9  | 2.80E-01 | 0.504 | 0.485 | 1.08 | 0.9  | -1.3  | 0.82 | 1.26E-02 | TMCC3(dist=176235), MIR492(dist=7601)            | intergenic     |
| 3  | 134829951 | A | G | rs114993576            | 5.44E-01 | 0.033 | 0.038 | 0.84 | 0.53 | -1.32 | 9.14E-07 | 0.069 | 0.032 | 2.22 | 1.52 | -3.26 | 1.65 | 1.26E-02 | EPHB1                                            | intronic       |
| 9  | 21345866  | T | G | rs116748507            | 7.94E-01 | 0.023 | 0.025 | 0.93 | 0.54 | -1.6  | 4.04E-05 | 0.063 | 0.036 | 1.79 | 1.21 | -2.65 | 1.86 | 1.27E-02 | KLHL9(dist=10437), IFNA6(dist=4451)              | intergenic     |
| 10 | 70635524  | A | C | rs35259877             | 6.35E-01 | 0.039 | 0.039 | 1.01 | 0.66 | -1.53 | 1.33E-05 | 0.095 | 0.058 | 1.71 | 1.23 | -2.36 | 1.53 | 1.27E-02 | STOX1                                            | intronic       |
| 4  | 158554149 | C | T | rs6854380              | 4.37E-05 | 0.443 | 0.361 | 0.71 | 0.6  | -0.84 | 3.29E-01 | 0.357 | 0.380 | 1.10 | 0.91 | -1.34 | 0.84 | 1.27E-02 | LOC340017(dist=56846), FAM198B(dist=491583)      | intergenic     |
| 4  | 92139269  | G | C | rs7696348              | 3.68E-01 | 0.465 | 0.483 | 0.93 | 0.79 | -1.09 | 1.91E-06 | 0.576 | 0.461 | 1.59 | 1.31 | -1.91 | 1.17 | 1.27E-02 | CCSER1                                           | intronic       |
| 9  | 21168527  | T | C | rs114682990            | 8.58E-01 | 0.020 | 0.021 | 0.94 | 0.53 | -1.68 | 5.68E-05 | 0.061 | 0.035 | 1.78 | 1.2  | -2.66 | 1.87 | 1.27E-02 | IFNA21(dist=1868), IFNA4(dist=18091)             | intergenic     |
| 5  | 66021794  | T | G | rs57098301             | 6.42E-06 | 0.043 | 0.020 | 2.17 | 1.4  | -3.36 | 5.88E-01 | 0.024 | 0.027 | 0.86 | 0.47 | -1.59 | 1.76 | 1.28E-02 | MAST4                                            | intronic       |
| 1  | 116411833 | G | A | rs4839049              | 5.00E-05 | 0.547 | 0.450 | 1.47 | 1.25 | -1.74 | 3.69E-01 | 0.514 | 0.486 | 0.89 | 0.74 | -1.08 | 1.19 | 1.28E-02 | NHLH2(dist=28086), LOC101928995(dist=501624)     | intergenic     |
| 1  | 231114340 | C | T | rs184909443            | 9.42E-01 | 0.049 | 0.049 | 0.99 | 0.68 | -1.45 | 5.46E-05 | 0.071 | 0.042 | 1.76 | 1.22 | -2.56 | 1.63 | 1.28E-02 | TTC13                                            | exonic         |
| 21 | 27381999  | G | A | rs148188310            | 3.56E-06 | 0.101 | 0.055 | 1.93 | 1.44 | -2.57 | 1.28E-01 | 0.047 | 0.061 | 0.75 | 0.48 | -1.17 | 1.40 | 1.29E-02 | APP                                              | intronic       |
| 1  | 53921346  | C | T | rs115212518            | 8.62E-01 | 0.024 | 0.028 | 0.88 | 0.52 | -1.49 | 3.85E-05 | 0.054 | 0.024 | 2.33 | 1.51 | -3.58 | 1.69 | 1.29E-02 | SLC25A3P1(dist=15653), DMRTB1(dist=3726)         | intergenic     |
| 12 | 31271027  | A | C | rs10843885             | 9.45E-01 | 0.155 | 0.157 | 1.02 | 0.81 | -1.27 | 6.39E-05 | 0.185 | 0.132 | 0.67 | 0.53 | -0.86 | 0.75 | 1.29E-02 | DDX11(dist=13302), FAM60A(dist=162493)           | intergenic     |
| 1  | 203974031 | G | A | rs12086184             | 6.58E-01 | 0.101 | 0.099 | 1.03 | 0.78 | -1.35 | 5.83E-05 | 0.113 | 0.072 | 1.63 | 1.21 | -2.21 | 1.38 | 1.30E-02 | SNRPE(dist=133751), LINC00303(dist=27544)        | intergenic     |
| 11 | 10410265  | C | T | rs76828773             | 2.04E-05 | 0.062 | 0.034 | 1.86 | 1.3  | -2.66 | 3.58E-01 | 0.033 | 0.039 | 0.85 | 0.51 | -1.43 | 1.61 | 1.30E-02 | CAND1.11                                         | ncRNA_intronic |
| 3  | 16590278  | G | A | rs73136630             | 1.27E-05 | 0.054 | 0.027 | 2.06 | 1.39 | -3.05 | 2.22E-01 | 0.021 | 0.029 | 0.72 | 0.38 | -1.38 | 1.63 | 1.30E-02 | LINC00690(dist=7398), DAZL(dist=38023)           | intergenic     |
| 1  | 203973917 | T | G | rs12093405             | 6.60E-01 | 0.101 | 0.099 | 1.03 | 0.78 | -1.35 | 5.77E-05 | 0.113 | 0.072 | 1.63 | 1.21 | -2.21 | 1.38 | 1.30E-02 | SNRPE(dist=133637), LINC00303(dist=27658)        | intergenic     |
| 6  | 31054531  | G | A | rs73727813             | 9.82E-01 | 0.088 | 0.093 | 0.95 | 0.71 | -1.26 | 5.00E-05 | 0.032 | 0.077 | 0.40 | 0.24 | -0.67 | 0.73 | 1.30E-02 | HCG22(dist=26876), C6orf15(dist=24469)           | intergenic     |
| 9  | 22336864  | C | T | rs114658048            | 9.77E-01 | 0.030 | 0.031 | 0.96 | 0.59 | -1.55 | 3.17E-05 | 0.058 | 0.029 | 2.08 | 1.38 | -3.15 | 1.68 | 1.30E-02 | CDKN2B-AS1(dist=215771), DMRTA1(dist=109976)     | intergenic     |
| 2  | 45135864  | A | G | rs80062367             | 7.08E-01 | 0.094 | 0.095 | 0.99 | 0.75 | -1.31 | 5.02E-05 | 0.110 | 0.067 | 1.71 | 1.26 | -2.32 | 1.38 | 1.32E-02 | CAMKMT(dist=136133), SIX3-AS1(dist=31429)        | intergenic     |
| 9  | 21175983  | G | A | rs12351527             | 6.97E-01 | 0.022 | 0.025 | 0.89 | 0.52 | -1.55 | 4.21E-05 | 0.061 | 0.034 | 1.82 | 1.22 | -2.72 | 1.90 | 1.32E-02 | IFNA21(dist=9324), IFNA4(dist=10635)             | intergenic     |
| 2  | 85037529  | C | A | rs1192364              | 8.95E-01 | 0.344 | 0.352 | 0.96 | 0.81 | -1.14 | 5.65E-05 | 0.417 | 0.324 | 1.50 | 1.24 | -1.81 | 1.19 | 1.32E-02 | DNAH6                                            | intronic       |
| 1  | 168861508 | G | A | rs1322501              | 5.35E-01 | 0.026 | 0.027 | 1.06 | 0.64 | -1.78 | 1.64E-05 | 0.069 | 0.038 | 0.54 | 0.37 | -0.78 | 0.60 | 1.32E-02 | LINC00626(dist=99382), LINC00970(dist=11635)     | intergenic     |
| 18 | 69243985  | C | G | rs34422476;rs9964817   | 6.87E-01 | 0.475 | 0.484 | 1.04 | 0.88 | -1.22 | 6.16E-05 | 0.536 | 0.443 | 0.69 | 0.57 | -0.83 | 0.84 | 1.32E-02 | LINC01541                                        | ncRNA_intronic |
| 7  | 21989288  | T | C | rs115339861            | 9.29E-01 | 0.048 | 0.047 | 1.01 | 0.69 | -1.48 | 3.43E-05 | 0.068 | 0.033 | 2.15 | 1.46 | -3.15 | 1.52 | 1.34E-02 | CDCA7L(dist=3746), RAPGEF5(dist=168620)          | intergenic     |
| 5  | 169150476 | G | C | rs60724222             | 8.37E-01 | 0.084 | 0.088 | 0.95 | 0.71 | -1.27 | 3.87E-05 | 0.118 | 0.067 | 1.85 | 1.38 | -2.49 | 1.36 | 1.35E-02 | DOCK2                                            | intronic       |
| 4  | 92133421  | G | A | rs7696664              | 5.64E-01 | 0.365 | 0.368 | 0.98 | 0.83 | -1.17 | 1.11E-05 | 0.453 | 0.359 | 1.48 | 1.23 | -1.79 | 1.18 | 1.35E-02 | CCSER1                                           | intronic       |
| 20 | 52038488  | G | A | rs67393385             | 9.64E-01 | 0.049 | 0.049 | 0.99 | 0.68 | -1.45 | 3.38E-05 | 0.074 | 0.041 | 1.89 | 1.31 | -2.72 | 1.50 | 1.36E-02 | TSHZ2                                            | intronic       |
| 4  | 15309718  | C | T | rs74540303             | 8.11E-01 | 0.035 | 0.040 | 0.88 | 0.57 | -1.37 | 4.26E-05 | 0.071 | 0.037 | 2.01 | 1.38 | -2.93 | 1.60 | 1.36E-02 | LOC101929095                                     | ncRNA_intronic |
| 7  | 21987312  | C | G | rs114476014            | 9.27E-01 | 0.047 | 0.046 | 1.01 | 0.69 | -1.49 | 4.09E-05 | 0.068 | 0.033 | 2.14 | 1.46 | -3.15 | 1.51 | 1.37E-02 | CDCA7L(dist=1770), RAPGEF5(dist=170596)          | intergenic     |
| 4  | 34970248  | A | G | rs28600731             | 9.27E-01 | 0.230 | 0.226 | 1.02 | 0.84 | -1.24 | 6.27E-05 | 0.305 | 0.231 | 1.46 | 1.19 | -1.79 | 1.21 | 1.37E-02 | LINC01928622(dist=928733), ARAP2(dist=1097372)   | intergenic     |
| 2  | 58818401  | C | G | rs62142261             | 8.67E-01 | 0.0   |       |      |      |       |          |       |       |      |      |       |      |          |                                                  |                |

|    |           |   |   |                                                |          |       |       |      |      |       |          |       |       |      |      |       |      |          |                                                  |                |
|----|-----------|---|---|------------------------------------------------|----------|-------|-------|------|------|-------|----------|-------|-------|------|------|-------|------|----------|--------------------------------------------------|----------------|
| 6  | 104464079 | T | C | rs74690909                                     | 5.98E-01 | 0.039 | 0.039 | 1.00 | 0.65 | -1.52 | 2.98E-05 | 0.062 | 0.028 | 2.26 | 1.51 | -3.38 | 1.60 | 1.41E-02 | GRIK2(dist=1946121), HACE1(dist=711889)          | intergenic     |
| 6  | 107369463 | A | C | rs9400080                                      | 9.79E-01 | 0.184 | 0.190 | 1.04 | 0.84 | -1.28 | 2.47E-05 | 0.216 | 0.145 | 0.61 | 0.49 | -0.77 | 0.79 | 1.41E-02 | C6orf203                                         | intronic       |
| 2  | 222535085 | G | A | rs78803378                                     | 9.44E-01 | 0.056 | 0.060 | 0.93 | 0.65 | -1.32 | 1.18E-05 | 0.082 | 0.044 | 1.96 | 1.38 | -2.78 | 1.47 | 1.42E-02 | EPHA4(dist=96163), PAX3(dist=529521)             | intergenic     |
| 12 | 27773226  | C | G | rs7297535                                      | 8.89E-01 | 0.117 | 0.118 | 1.00 | 0.77 | -1.28 | 2.85E-05 | 0.151 | 0.099 | 1.63 | 1.25 | -2.12 | 1.34 | 1.42E-02 | PPF1BP1                                          | intronic       |
| 4  | 2775874   | G | A | rs13108696                                     | 7.63E-01 | 0.032 | 0.033 | 0.99 | 0.63 | -1.57 | 3.06E-07 | 0.063 | 0.038 | 1.72 | 1.16 | -2.55 | 1.79 | 1.42E-02 | TNIP2(dist=17771), SH3BP2(dist=18876)            | intergenic     |
| 3  | 16589373  | T | C | rs73136628                                     | 1.22E-05 | 0.053 | 0.026 | 2.07 | 1.4  | -3.07 | 2.09E-01 | 0.021 | 0.029 | 0.71 | 0.37 | -1.37 | 1.62 | 1.43E-02 | LINC00690(dist=6493), DAZL1(dist=38928)          | intergenic     |
| 12 | 31294004  | G | A | rs2639056                                      | 5.48E-01 | 0.139 | 0.150 | 1.09 | 0.86 | -1.38 | 1.58E-05 | 0.227 | 0.151 | 0.61 | 0.48 | -0.76 | 0.79 | 1.44E-02 | DDX11(dist=36279), FAM60A(dist=139516)           | intergenic     |
| 7  | 21985507  | C | A | rs191657039                                    | 9.31E-01 | 0.046 | 0.046 | 1.02 | 0.69 | -1.5  | 4.81E-05 | 0.068 | 0.033 | 2.14 | 1.46 | -3.14 | 1.51 | 1.44E-02 | CDCA7L                                           | UTR5           |
| 17 | 68708504  | A | G | rs144773472                                    | 1.99E-05 | 0.054 | 0.025 | 2.20 | 1.48 | -3.26 | 1.15E-01 | 0.017 | 0.026 | 0.62 | 0.3  | -1.28 | 1.61 | 1.44E-02 | KCNJ2(dist=532321), CASC17(dist=385411)          | intergenic     |
| 6  | 39108006  | G | C | rs228816                                       | 7.97E-01 | 0.119 | 0.112 | 0.94 | 0.73 | -1.21 | 4.98E-05 | 0.189 | 0.140 | 0.70 | 0.55 | -0.89 | 0.77 | 1.44E-02 | SAYSD1(dist=25044), KCNK5(dist=48741)            | intergenic     |
| 14 | 97498654  | C | T | rs75908488                                     | 5.15E-05 | 0.038 | 0.021 | 1.82 | 1.16 | -2.88 | 6.78E-01 | 0.026 | 0.027 | 0.95 | 0.53 | -1.7  | 1.99 | 1.45E-02 | LINC00618(dist=86923), LOC101929241(dist=426499) | intergenic     |
| 17 | 6035617   | G | A | rs28712872                                     | 8.70E-01 | 0.484 | 0.484 | 1.00 | 0.85 | -1.17 | 6.48E-05 | 0.568 | 0.485 | 0.72 | 0.59 | -0.86 | 0.85 | 1.48E-02 | WSCD1(dist=7870), AIP1(dist=291440)              | intergenic     |
| 6  | 32479512  | T | C | rs113327522                                    | 6.39E-05 | 0.053 | 0.087 | 0.59 | 0.42 | -0.84 | 1.10E-02 | 0.077 | 0.111 | 0.67 | 0.47 | -0.95 | 0.62 | 1.48E-02 | HLA-DRA(dist=66686), HLA-DRB5(dist=5642)         | intergenic     |
| 13 | 78872334  | G | A | rs77700655                                     | 6.63E-01 | 0.044 | 0.042 | 1.05 | 0.71 | -1.57 | 7.63E-06 | 0.058 | 0.034 | 1.76 | 1.17 | -2.65 | 1.62 | 1.49E-02 | RNF219-AS1                                       | ncRNA_intronic |
| 3  | 16588882  | C | A | rs73136626                                     | 1.27E-05 | 0.053 | 0.026 | 2.07 | 1.39 | -3.07 | 2.08E-01 | 0.021 | 0.029 | 0.71 | 0.37 | -1.37 | 1.62 | 1.49E-02 | LINC00690(dist=6002), DAZL1(dist=39419)          | intergenic     |
| 21 | 34323378  | C | T | rs8133266                                      | 9.70E-01 | 0.121 | 0.126 | 0.96 | 0.75 | -1.23 | 3.53E-05 | 0.150 | 0.104 | 1.52 | 1.16 | -1.98 | 1.36 | 1.49E-02 | C21orf62(dist=137325), OLIG2(dist=74838)         | intergenic     |
| 4  | 15330818  | T | C | rs76753296                                     | 8.26E-01 | 0.035 | 0.039 | 0.89 | 0.57 | -1.37 | 4.17E-05 | 0.069 | 0.036 | 2.01 | 1.37 | -2.93 | 1.60 | 1.49E-02 | LOC101929095                                     | ncRNA_intronic |
| 8  | 139207491 | C | T | rs5008950                                      | 9.47E-01 | 0.087 | 0.089 | 0.97 | 0.73 | -1.3  | 3.80E-05 | 0.124 | 0.073 | 1.80 | 1.34 | -2.4  | 1.34 | 1.50E-02 | FAM135B                                          | intronic       |
| 4  | 34967868  | G | T | rs6825756                                      | 8.09E-01 | 0.318 | 0.316 | 1.01 | 0.85 | -1.2  | 3.93E-05 | 0.413 | 0.329 | 1.43 | 1.18 | -1.73 | 1.18 | 1.50E-02 | LOC101928622(dist=926353), ARAP2(dist=1099752)   | intergenic     |
| 10 | 16570164  | C | G | rs11254056                                     | 8.32E-01 | 0.411 | 0.423 | 0.95 | 0.81 | -1.13 | 4.97E-05 | 0.487 | 0.386 | 1.51 | 1.25 | -1.82 | 1.18 | 1.50E-02 | C1QL3(dist=6160), RSU1(dist=62453)               | intergenic     |
| 3  | 195143259 | G | C | rs115369692                                    | 1.47E-05 | 0.059 | 0.035 | 1.73 | 1.2  | -2.49 | 1.75E-01 | 0.023 | 0.030 | 0.75 | 0.4  | -1.4  | 1.72 | 1.50E-02 | ACAP2                                            | intronic       |
| 7  | 8161106   | T | C | rs73235836                                     | 8.97E-01 | 0.224 | 0.228 | 0.98 | 0.8  | -1.19 | 4.04E-05 | 0.282 | 0.214 | 1.45 | 1.18 | -1.79 | 1.23 | 1.50E-02 | ICA1                                             | intronic       |
| 1  | 53893378  | A | T | rs77638930                                     | 8.84E-01 | 0.025 | 0.028 | 0.89 | 0.53 | -1.5  | 6.19E-05 | 0.053 | 0.023 | 2.32 | 1.5  | -3.58 | 1.67 | 1.50E-02 | LRP8(dist=99557), SLC25A3P1(dist=10665)          | intergenic     |
| 10 | 132209268 | C | G | rs7908858                                      | 3.83E-05 | 0.428 | 0.364 | 1.31 | 1.11 | -1.54 | 2.92E-01 | 0.376 | 0.390 | 0.94 | 0.78 | -1.14 | 1.21 | 1.51E-02 | GLRX3(dist=230622), MIR378C(dist=551583)         | intergenic     |
| 2  | 221740609 | T | C | rs11681257                                     | 7.17E-01 | 0.036 | 0.040 | 0.88 | 0.57 | -1.37 | 1.91E-06 | 0.062 | 0.032 | 1.98 | 1.33 | -2.95 | 1.68 | 1.51E-02 | MIR4268(dist=969323), EPHA4(dist=542138)         | intergenic     |
| 6  | 70935133  | G | A | rs115513529                                    | 9.34E-01 | 0.062 | 0.065 | 0.96 | 0.68 | -1.34 | 2.68E-05 | 0.095 | 0.050 | 1.99 | 1.43 | -2.76 | 1.42 | 1.51E-02 | COL9A1                                           | intronic       |
| 3  | 16588717  | A | G | rs73136624                                     | 1.28E-05 | 0.053 | 0.026 | 2.07 | 1.39 | -3.07 | 2.08E-01 | 0.021 | 0.029 | 0.71 | 0.37 | -1.37 | 1.62 | 1.51E-02 | LINC00690(dist=5837), DAZL1(dist=39584)          | intergenic     |
| 13 | 83952933  | G | A | rs7983190                                      | 8.52E-01 | 0.204 | 0.205 | 0.99 | 0.81 | -1.22 | 3.34E-05 | 0.133 | 0.204 | 0.60 | 0.46 | -0.79 | 0.82 | 1.52E-02 | NONE(dist=NONE), SLITRK1(dist=498407)            | intergenic     |
| 5  | 2885685   | T | C | rs1874061                                      | 5.96E-01 | 0.284 | 0.301 | 0.92 | 0.77 | -1.1  | 2.97E-06 | 0.338 | 0.247 | 1.55 | 1.27 | -1.9  | 1.22 | 1.52E-02 | C5orf38(dist=130174), LINC01377(dist=292264)     | intergenic     |
| 15 | 87943268  | A | G | rs114703946                                    | 8.18E-01 | 0.029 | 0.030 | 0.97 | 0.6  | -1.58 | 2.92E-05 | 0.048 | 0.023 | 2.12 | 1.34 | -3.34 | 1.70 | 1.53E-02 | AGBL1(dist=370985), LINC00052(dist=176892)       | intergenic     |
| 14 | 101910147 | C | T | rs2401023                                      | 9.86E-01 | 0.087 | 0.076 | 0.87 | 0.65 | -1.16 | 1.65E-05 | 0.129 | 0.095 | 0.71 | 0.54 | -0.94 | 0.72 | 1.55E-02 | LINC00524(dist=35888), DIO3OS(dist=108413)       | intergenic     |
| 8  | 139219742 | C | T | rs114603662                                    | 9.40E-01 | 0.087 | 0.091 | 0.95 | 0.71 | -1.27 | 2.81E-05 | 0.122 | 0.071 | 1.83 | 1.37 | -2.45 | 1.35 | 1.56E-02 | FAM135B                                          | intronic       |
| 1  | 53937670  | G | A | rs114021475                                    | 8.27E-01 | 0.024 | 0.027 | 0.87 | 0.52 | -1.48 | 5.29E-05 | 0.054 | 0.025 | 2.28 | 1.49 | -3.5  | 1.66 | 1.56E-02 | DMRTB1(dist=4510), GLIS1(dist=34236)             | intergenic     |
| 16 | 86680578  | C | A | rs111527449                                    | 8.61E-01 | 0.033 | 0.030 | 1.11 | 0.7  | -1.75 | 5.76E-05 | 0.059 | 0.039 | 1.56 | 1.04 | -2.34 | 1.76 | 1.57E-02 | FOXL1(dist=65274), LOC440390(dist=410812)        | intergenic     |
| 4  | 34969798  | G | C | rs10016528                                     | 8.58E-01 | 0.327 | 0.324 | 1.01 | 0.85 | -1.21 | 5.80E-05 | 0.424 | 0.341 | 1.42 | 1.18 | -1.72 | 1.18 | 1.57E-02 | LOC101928622(dist=928283), ARAP2(dist=1097822)   | intergenic     |
| 3  | 88969387  | A | C | rs9828942;rs71618704                           | 5.42E-01 | 0.063 | 0.062 | 0.99 | 0.71 | -1.38 | 9.51E-06 | 0.114 | 0.078 | 0.66 | 0.49 | -0.89 | 0.70 | 1.59E-02 | C3orf38(dist=762272), EPHA3(dist=187287)         | intergenic     |
| 10 | 17480856  | A | T | rs113162935                                    | 8.38E-01 | 0.039 | 0.042 | 0.91 | 0.6  | -1.39 | 1.27E-05 | 0.064 | 0.030 | 2.25 | 1.52 | -3.34 | 1.55 | 1.60E-02 | ST8SIA6                                          | intronic       |
| 12 | 116432248 | C | T | rs77159726                                     | 7.45E-01 | 0.111 | 0.109 | 1.02 | 0.79 | -1.32 | 5.91E-05 | 0.062 | 0.116 | 0.50 | 0.34 | -0.74 | 0.78 | 1.62E-02 | MED13L                                           | intronic       |
| 2  | 78055723  | C | T | rs115174260                                    | 3.44E-01 | 0.027 | 0.033 | 0.79 | 0.48 | -1.3  | 4.23E-06 | 0.074 | 0.032 | 2.37 | 1.63 | -3.44 | 1.56 | 1.64E-02 | LOC101927967                                     | ncRNA_intronic |
| 8  | 60340936  | T | A | rs1474124                                      | 9.01E-01 | 0.041 | 0.043 | 1.04 | 0.69 | -1.57 | 5.80E-05 | 0.077 | 0.037 | 0.46 | 0.32 | -0.67 | 0.68 | 1.64E-02 | TOX(dist=309169), CA8(dist=760487)               | intronic       |
| 15 | 82509107  | T | G | rs28752301                                     | 7.26E-01 | 0.371 | 0.390 | 0.92 | 0.78 | -1.09 | 2.92E-05 | 0.441 | 0.341 | 1.53 | 1.27 | -1.85 | 1.17 | 1.64E-02 | EFTUD1                                           | intronic       |
| 15 | 83232586  | T | C | rs17841176                                     | 5.22E-01 | 0.245 | 0.263 | 0.91 | 0.75 | -1.1  | 3.58E-06 | 0.330 | 0.238 | 1.58 | 1.29 | -1.93 | 1.20 | 1.64E-02 | CPFB1                                            | intronic       |
| 2  | 207114680 | G | C | rs73069672                                     | 8.94E-01 | 0.028 | 0.028 | 1.01 | 0.62 | -1.65 | 2.28E-05 | 0.047 | 0.024 | 1.95 | 1.23 | -3.08 | 1.79 | 1.65E-02 | GPR1-AS                                          | ncRNA_intronic |
| 4  | 92129503  | T | C | rs13116937                                     | 4.15E-01 | 0.485 | 0.502 | 0.93 | 0.79 | -1.1  | 6.61E-06 | 0.584 | 0.475 | 1.55 | 1.28 | -1.87 | 1.17 | 1.65E-02 | CCSER1                                           | intronic       |
| 6  | 90700531  | A | G | rs79632797                                     | 6.70E-01 | 0.047 | 0.051 | 0.92 | 0.63 | -1.35 | 1.79E-05 | 0.089 | 0.054 | 1.71 | 1.22 | -2.4  | 1.64 | 1.65E-02 | BACH2                                            | intronic       |
| 16 | 54028674  | C | T | rs13335576                                     | 7.95E-01 | 0.043 | 0.047 | 0.91 | 0.61 | -1.35 | 8.20E-06 | 0.069 | 0.036 | 2.00 | 1.37 | -2.92 | 1.57 | 1.65E-02 | FTO                                              | intronic       |
| 2  | 140854641 | C | G | rs10496832                                     | 7.90E-01 | 0.025 | 0.024 | 1.05 | 0.63 | -1.77 | 2.98E-05 | 0.042 | 0.020 | 2.09 | 1.29 | -3.39 | 1.77 | 1.67E-02 | YY1P2(dist=1197897), LRP1B(dist=134355)          | intergenic     |
| 6  | 107366736 | G | A | rs311248                                       | 9.33E-01 | 0.180 | 0.187 | 1.05 | 0.85 | -1.3  | 2.06E-05 | 0.215 | 0.143 | 0.61 | 0.48 | -0.77 | 0.80 | 1.67E-02 | C6orf203                                         | intronic       |
| 2  | 47648403  | C | T | rs116011522                                    | 1.16E-05 | 0.084 | 0.051 | 1.69 | 1.24 | -2.3  | 1.35E-01 | 0.036 | 0.050 | 0.71 | 0.43 | -1.16 | 1.57 | 1.68E-02 | MSH2                                             | intronic       |
| 16 | 81681747  | A | G | rs73598501                                     | 5.01E-01 | 0.100 | 0.110 | 0.90 | 0.69 | -1.18 | 6.54E-06 | 0.150 | 0.093 | 1.72 | 1.32 | -2.25 | 1.36 | 1.68E-02 | CMIP                                             | intronic       |
| 2  | 140855547 | A | A | rs16843295                                     | 7.93E-01 | 0.026 | 0.024 | 1.05 | 0.63 | -1.77 | 2.98E-05 | 0.042 | 0.020 | 2.09 | 1.29 | -3.39 | 1.77 | 1.69E-02 | YY1P2(dist=1198803), LRP1B(dist=133449)          | intergenic     |
| 2  | 140852939 | A | G | rs114149163                                    | 7.97E-01 | 0.025 | 0.024 | 1.05 | 0.62 | -1.77 | 2.94E-05 | 0.042 | 0.020 | 2.09 | 1.29 | -3.4  | 1.77 | 1.69E-02 | YY1P2(dist=1196195), LRP1B(dist=136057)          | intergenic     |
| 1  | 210995697 | C | T | rs4951640                                      | 1.92E-05 | 0.284 | 0.379 | 0.65 | 0.55 | -0.78 | 1.82E-01 | 0.375 | 0.342 | 1.15 | 0.95 | -1.4  | 0.85 | 1.70E-02 | KCNH1                                            | intronic       |
| 1  | 241355462 | G | A | rs200061991;rs370386519;rs540401672;rs12563118 | 9.31E-01 | 0.045 | 0.043 | 1.05 | 0.71 | -1.55 | 6.86E-06 | 0.063 | 0.037 | 1.77 | 1.19 | -2.62 | 1.58 | 1.70E-02 | RGS7                                             | intronic       |
| 2  | 140850934 | T | C | rs149036101                                    | 8.07E-01 | 0.025 | 0.024 | 1.05 | 0.62 | -1.76 | 2.84E-05 | 0.042 | 0.020 | 2.10 | 1.29 | -3.4  | 1.77 | 1.71E-02 | YY1P2(dist=1194190), LRP1B(dist=138062)          | intergenic     |
| 3  | 172187548 | T | C | rs9874429                                      | 3.71E-05 | 0.349 | 0.272 | 0.70 | 0.59 | -0.83 | 2.60E-01 | 0.275 | 0.296 | 1.11 | 0.9  | -1.37 | 0.84 | 1.71E-02 | GHSR(dist=21302), TNFSF10(dist=35750)            | intergenic     |
| 1  | 60104814  | T | C | rs74933689                                     | 7.44E-01 | 0.098 | 0.105 | 0.93 | 0.71 |       |          |       |       |      |      |       |      |          |                                                  |                |

|    |           |   |   |                        |          |       |       |      |      |       |          |       |       |      |      |       |      |          |                                                 |                |
|----|-----------|---|---|------------------------|----------|-------|-------|------|------|-------|----------|-------|-------|------|------|-------|------|----------|-------------------------------------------------|----------------|
| 6  | 70942319  | G | T | rs34119578             | 8.74E-01 | 0.062 | 0.065 | 0.94 | 0.67 | -1.32 | 2.45E-05 | 0.095 | 0.050 | 1.99 | 1.43 | -2.76 | 1.40 | 1.80E-02 | COL9A1                                          | exonic         |
| 10 | 134699301 | A | T | rs45547444             | 5.74E-01 | 0.088 | 0.085 | 1.04 | 0.78 | -1.39 | 1.46E-05 | 0.156 | 0.113 | 1.46 | 1.12 | -1.89 | 1.36 | 1.80E-02 | CFAP46                                          | intronic       |
| 13 | 106408226 | T | C | rs57334283             | 9.17E-01 | 0.114 | 0.116 | 0.97 | 0.75 | -1.26 | 5.03E-05 | 0.135 | 0.088 | 1.61 | 1.22 | -2.13 | 1.35 | 1.81E-02 | LINC00343                                       | ncRNA_intronic |
| 4  | 168220221 | T | C | rs73861968             | 9.87E-01 | 0.047 | 0.048 | 0.99 | 0.67 | -1.45 | 4.23E-05 | 0.070 | 0.043 | 1.68 | 1.16 | -2.44 | 1.54 | 1.81E-02 | SPOCK3(dist=64480), ANXA10(dist=793467)         | intergenic     |
| 4  | 158549747 | A | G | rs6814316              | 5.83E-05 | 0.423 | 0.342 | 0.71 | 0.6  | -0.84 | 2.98E-01 | 0.338 | 0.364 | 1.12 | 0.92 | -1.36 | 0.85 | 1.81E-02 | LOC340017(dist=52444), FAM198B(dist=495985)     | intergenic     |
| 2  | 132470190 | T | G | rs111411351            | 6.59E-01 | 0.075 | 0.084 | 0.88 | 0.65 | -1.2  | 1.32E-06 | 0.097 | 0.056 | 1.82 | 1.31 | -2.51 | 1.50 | 1.82E-02 | LINC01087(dist=63002), C2orf27A(dist=9874)      | intergenic     |
| 15 | 82573833  | A | G | rs3973890              | 4.16E-01 | 0.368 | 0.395 | 0.89 | 0.75 | -1.05 | 2.96E-06 | 0.452 | 0.340 | 1.60 | 1.32 | -1.93 | 1.17 | 1.82E-02 | SAXO2                                           | intronic       |
| 2  | 132466984 | C | A | rs112722579            | 6.54E-01 | 0.075 | 0.084 | 0.88 | 0.65 | -1.2  | 1.33E-06 | 0.097 | 0.056 | 1.82 | 1.31 | -2.51 | 1.50 | 1.83E-02 | LINC01087(dist=59796), C2orf27A(dist=13080)     | intergenic     |
| 4  | 24988577  | G | A | rs73107507             | 4.51E-05 | 0.058 | 0.029 | 2.05 | 1.41 | -2.99 | 2.29E-01 | 0.026 | 0.034 | 0.75 | 0.42 | -1.35 | 1.53 | 1.84E-02 | CCDC149(dist=6751), LGI2(dist=11894)            | intergenic     |
| 9  | 119192516 | A | C | rs6478237              | 6.08E-01 | 0.168 | 0.175 | 1.06 | 0.85 | -1.31 | 1.47E-05 | 0.242 | 0.171 | 0.65 | 0.52 | -0.81 | 0.81 | 1.84E-02 | ASTN2                                           | intronic       |
| 9  | 91147629  | A | G | rs7866060              | 8.15E-01 | 0.188 | 0.193 | 0.97 | 0.79 | -1.19 | 1.31E-05 | 0.249 | 0.181 | 1.50 | 1.21 | -1.87 | 1.25 | 1.87E-02 | SPIN1(dist=54007), NXNL2(dist=2387)             | intergenic     |
| 9  | 22521011  | T | C | rs114610603            | 6.62E-01 | 0.029 | 0.033 | 0.87 | 0.54 | -1.42 | 2.19E-05 | 0.062 | 0.029 | 2.23 | 1.49 | -3.33 | 1.59 | 1.87E-02 | DMRTA1(dist=68539), LINC01239(dist=125188)      | intergenic     |
| 3  | 14594007  | G | A | rs115427540            | 4.53E-01 | 0.027 | 0.033 | 0.82 | 0.5  | -1.34 | 5.84E-07 | 0.063 | 0.032 | 2.04 | 1.37 | -3.03 | 1.71 | 1.87E-02 | GRIP2(dist=12157), CCDC174(dist=99246)          | intergenic     |
| 5  | 145301422 | T | C | rs73792736             | 9.94E-01 | 0.040 | 0.041 | 0.97 | 0.64 | -1.47 | 3.11E-05 | 0.054 | 0.025 | 2.22 | 1.44 | -3.42 | 1.56 | 1.88E-02 | GRXCR2(dist=48891), SH3RF2(dist=14704)          | intergenic     |
| 2  | 140854922 | C | A | rs77923807             | 9.23E-01 | 0.025 | 0.025 | 1.01 | 0.6  | -1.7  | 2.98E-05 | 0.042 | 0.020 | 2.09 | 1.29 | -3.39 | 1.80 | 1.89E-02 | YY1P2(dist=1198178), LRP1B(dist=134074)         | intergenic     |
| 3  | 142683156 | C | T | rs114529328            | 9.69E-01 | 0.027 | 0.029 | 0.93 | 0.57 | -1.52 | 4.92E-05 | 0.050 | 0.026 | 1.98 | 1.27 | -3.08 | 1.79 | 1.89E-02 | PAQR9-AS1                                       | ncRNA_intronic |
| 4  | 70512721  | G | T | rs72552708             | 7.88E-01 | 0.022 | 0.021 | 1.08 | 0.62 | -1.89 | 1.52E-05 | 0.041 | 0.021 | 2.06 | 1.27 | -3.34 | 1.83 | 1.89E-02 | UGT2A1                                          | exonic         |
| 8  | 74313243  | G | T | rs78778217             | 8.71E-01 | 0.027 | 0.027 | 1.00 | 0.61 | -1.66 | 4.01E-05 | 0.047 | 0.023 | 2.14 | 1.36 | -3.38 | 1.69 | 1.90E-02 | LOC101926926(dist=44547), STAU2-AS1(dist=19066) | intergenic     |
| 6  | 25005257  | A | T | rs58120451;rs193080756 | 8.70E-01 | 0.032 | 0.033 | 0.98 | 0.62 | -1.55 | 2.54E-05 | 0.058 | 0.031 | 1.91 | 1.27 | -2.88 | 1.73 | 1.90E-02 | FAM65B                                          | intronic       |
| 4  | 18644640  | T | C | rs188791240            | 8.63E-01 | 0.027 | 0.029 | 0.91 | 0.55 | -1.51 | 5.07E-06 | 0.047 | 0.024 | 1.99 | 1.26 | -3.13 | 1.82 | 1.90E-02 | PDLIM3                                          | intronic       |
| 20 | 62308612  | T | G | rs2738783              | 5.23E-06 | 0.073 | 0.038 | 0.50 | 0.36 | -0.7  | 3.88E-01 | 0.053 | 0.066 | 1.27 | 0.84 | -1.92 | 0.69 | 1.91E-02 | RTEL1-TNFRSF6B                                  | ncRNA_intronic |
| 4  | 2775988   | G | A | rs13108937             | 6.96E-01 | 0.031 | 0.032 | 0.98 | 0.61 | -1.56 | 4.04E-07 | 0.062 | 0.037 | 1.71 | 1.15 | -2.54 | 1.75 | 1.92E-02 | TNIP2(dist=17885), SH3BP2(dist=18762)           | intergenic     |
| 4  | 34971282  | T | A | rs11096753             | 6.10E-01 | 0.312 | 0.315 | 0.99 | 0.83 | -1.18 | 1.81E-05 | 0.414 | 0.328 | 1.45 | 1.2  | -1.75 | 1.18 | 1.94E-02 | LOC101928622(dist=929767), ARAP2(dist=1096338)  | intergenic     |
| 6  | 70946343  | T | C | rs78100299             | 8.60E-01 | 0.062 | 0.065 | 0.94 | 0.67 | -1.32 | 2.69E-05 | 0.094 | 0.050 | 1.98 | 1.42 | -2.75 | 1.40 | 1.94E-02 | COL9A1                                          | intronic       |
| 6  | 70946294  | A | C | rs116013267            | 8.59E-01 | 0.062 | 0.065 | 0.94 | 0.67 | -1.32 | 2.69E-05 | 0.094 | 0.050 | 1.98 | 1.42 | -2.75 | 1.40 | 1.94E-02 | COL9A1                                          | intronic       |
| 12 | 41722390  | T | A | rs184924781            | 7.70E-01 | 0.030 | 0.033 | 0.91 | 0.57 | -1.46 | 9.69E-06 | 0.054 | 0.027 | 2.06 | 1.34 | -3.15 | 1.67 | 1.94E-02 | PDZRN4                                          | intronic       |
| 1  | 202656865 | C | T | rs115541247            | 4.29E-01 | 0.017 | 0.022 | 0.75 | 0.4  | -1.39 | 1.66E-07 | 0.046 | 0.020 | 2.37 | 1.49 | -3.78 | 1.84 | 1.95E-02 | SYT2                                            | intronic       |
| 4  | 158542365 | C | T | rs13112426             | 4.11E-05 | 0.377 | 0.296 | 0.70 | 0.59 | -0.83 | 2.33E-01 | 0.297 | 0.327 | 1.15 | 0.94 | -1.41 | 0.85 | 1.95E-02 | LOC340017(dist=45062), FAM198B(dist=503367)     | intergenic     |
| 4  | 92123522  | T | C | rs11097306             | 3.87E-01 | 0.368 | 0.378 | 0.96 | 0.81 | -1.14 | 5.52E-06 | 0.472 | 0.374 | 1.49 | 1.24 | -1.8  | 1.17 | 1.96E-02 | CCSER1                                          | intronic       |
| 6  | 78131923  | T | C | rs2179801              | 8.09E-01 | 0.405 | 0.391 | 1.06 | 0.9  | -1.25 | 5.75E-05 | 0.307 | 0.403 | 0.66 | 0.54 | -0.81 | 0.85 | 1.96E-02 | IMPG1(dist=1349528), HTR1B(dist=40025)          | intergenic     |
| 4  | 158542688 | T | C | rs2130676              | 4.17E-05 | 0.376 | 0.296 | 0.70 | 0.59 | -0.83 | 2.33E-01 | 0.297 | 0.327 | 1.15 | 0.94 | -1.41 | 0.85 | 1.97E-02 | LOC340017(dist=45385), FAM198B(dist=503044)     | intergenic     |
| 6  | 29430829  | G | A | rs16894941             | 6.70E-01 | 0.078 | 0.085 | 0.91 | 0.68 | -1.24 | 2.87E-05 | 0.132 | 0.076 | 1.84 | 1.39 | -2.44 | 1.34 | 1.97E-02 | OR2H1(NM_030883:c."332G>A)                      | UTR3           |
| 8  | 60468372  | C | T | rs4463409              | 9.84E-01 | 0.235 | 0.240 | 0.97 | 0.8  | -1.18 | 4.78E-05 | 0.261 | 0.190 | 1.50 | 1.21 | -1.86 | 1.23 | 1.97E-02 | TOX(dist=436605), CAB8(dist=633051)             | intergenic     |
| 17 | 52167708  | C | A | rs182386255            | 4.20E-05 | 0.057 | 0.030 | 1.96 | 1.34 | -2.86 | 3.78E-01 | 0.041 | 0.047 | 0.87 | 0.54 | -1.39 | 1.49 | 1.97E-02 | KIF2B(dist=265135), TOM1L1(dist=810344)         | intergenic     |
| 17 | 52165378  | A | T | rs143822001            | 4.23E-05 | 0.057 | 0.030 | 1.96 | 1.34 | -2.86 | 3.77E-01 | 0.041 | 0.047 | 0.87 | 0.54 | -1.39 | 1.49 | 1.98E-02 | KIF2B(dist=262805), TOM1L1(dist=812674)         | intergenic     |
| 19 | 50280376  | C | T | rs11671380             | 5.33E-01 | 0.038 | 0.041 | 0.92 | 0.6  | -1.4  | 3.31E-06 | 0.063 | 0.037 | 1.73 | 1.17 | -2.56 | 1.74 | 1.99E-02 | AP2A1                                           | intronic       |
| 15 | 83682579  | A | G | rs28756227             | 3.16E-01 | 0.032 | 0.041 | 0.77 | 0.49 | -1.22 | 1.66E-06 | 0.085 | 0.041 | 2.14 | 1.51 | -3.03 | 1.48 | 1.99E-02 | C15orf40(dist=2186), BTBD1(dist=2602)           | intergenic     |
| 6  | 70938792  | A | G | rs76946863             | 8.51E-01 | 0.066 | 0.069 | 0.95 | 0.68 | -1.32 | 2.53E-05 | 0.095 | 0.050 | 1.99 | 1.43 | -2.76 | 1.39 | 1.99E-02 | COL9A1                                          | intronic       |
| 17 | 52163496  | G | A | rs114608446            | 4.27E-05 | 0.057 | 0.030 | 1.96 | 1.34 | -2.85 | 3.77E-01 | 0.041 | 0.047 | 0.87 | 0.54 | -1.39 | 1.49 | 2.00E-02 | KIF2B(dist=260923), TOM1L1(dist=814556)         | intergenic     |
| 4  | 4593166   | T | G | rs114501893            | 8.89E-01 | 0.027 | 0.028 | 0.98 | 0.59 | -1.62 | 4.16E-05 | 0.044 | 0.023 | 1.94 | 1.22 | -3.1  | 1.79 | 2.00E-02 | STX18-AS1                                       | ncRNA_intronic |
| 13 | 24548399  | C | T | rs8000902              | 7.87E-01 | 0.397 | 0.400 | 0.99 | 0.84 | -1.16 | 4.46E-05 | 0.499 | 0.421 | 1.37 | 1.14 | -1.65 | 1.18 | 2.01E-02 | ANKRD20A19P(dist=24945), SPATA13(dist=5366)     | intergenic     |
| 14 | 101942768 | T | C | rs7149305              | 5.10E-01 | 0.115 | 0.112 | 0.97 | 0.75 | -1.25 | 1.06E-05 | 0.198 | 0.151 | 0.72 | 0.57 | -0.91 | 0.76 | 2.01E-02 | LINC00524(dist=68509), DIO3OS(dist=75792)       | intergenic     |
| 17 | 52160920  | A | G | rs138642276            | 4.32E-05 | 0.057 | 0.030 | 1.95 | 1.34 | -2.85 | 3.77E-01 | 0.041 | 0.047 | 0.87 | 0.54 | -1.39 | 1.49 | 2.02E-02 | KIF2B(dist=258347), TOM1L1(dist=817132)         | intergenic     |
| 2  | 44192157  | T | C | rs76453754             | 9.57E-01 | 0.024 | 0.023 | 1.07 | 0.63 | -1.82 | 5.44E-05 | 0.044 | 0.023 | 1.98 | 1.24 | -3.15 | 1.78 | 2.02E-02 | LRPPRC                                          | intronic       |
| 2  | 171480489 | C | T | rs6733023              | 9.55E-01 | 0.250 | 0.245 | 1.02 | 0.85 | -1.24 | 2.17E-05 | 0.348 | 0.290 | 1.91 | 1.07 | -1.59 | 1.22 | 2.02E-02 | MYO3B                                           | intronic       |
| 8  | 89391848  | G | C | rs1463923              | 7.94E-01 | 0.478 | 0.473 | 0.98 | 0.83 | -1.15 | 3.65E-05 | 0.573 | 0.491 | 0.72 | 0.59 | -0.87 | 0.86 | 2.02E-02 | MMP16(dist=52131), LOC101929709(dist=1337779)   | intergenic     |
| 13 | 93125591  | T | C | rs61973636             | 3.16E-05 | 0.147 | 0.099 | 1.58 | 1.25 | -2.01 | 2.33E-01 | 0.094 | 0.108 | 0.85 | 0.62 | -1.17 | 1.28 | 2.02E-02 | GPC5                                            | intronic       |
| 15 | 83921787  | G | A | rs114055405            | 5.22E-01 | 0.035 | 0.042 | 0.84 | 0.54 | -1.3  | 1.22E-05 | 0.080 | 0.040 | 2.08 | 1.46 | -2.97 | 1.48 | 2.03E-02 | HDFFRP3(dist=45017), BNC1(dist=2868)            | intergenic     |
| 4  | 103188059 | G | A | rs28665758             | 7.37E-01 | 0.211 | 0.223 | 0.93 | 0.76 | -1.14 | 4.62E-05 | 0.256 | 0.177 | 1.60 | 1.29 | -1.99 | 1.21 | 2.04E-02 | SLC39A8                                         | intronic       |
| 11 | 14217874  | G | A | rs11603589             | 9.26E-01 | 0.106 | 0.109 | 0.97 | 0.74 | -1.26 | 6.30E-05 | 0.145 | 0.095 | 1.61 | 1.23 | -2.11 | 1.30 | 2.05E-02 | SPON1                                           | intronic       |
| 9  | 5638218   | C | G | rs115503729            | 6.00E-01 | 0.030 | 0.034 | 0.88 | 0.55 | -1.4  | 3.66E-06 | 0.062 | 0.032 | 2.01 | 1.35 | -3    | 1.69 | 2.05E-02 | RIC1                                            | intronic       |
| 13 | 93124105  | T | C | rs61973634             | 5.29E-05 | 0.152 | 0.104 | 1.54 | 1.22 | -1.95 | 2.17E-01 | 0.096 | 0.110 | 0.86 | 0.63 | -1.18 | 1.29 | 2.06E-02 | GPC5                                            | intronic       |
| 20 | 62270637  | T | C | rs909333               | 4.52E-05 | 0.109 | 0.064 | 1.77 | 1.35 | -2.34 | 4.30E-01 | 0.066 | 0.081 | 0.80 | 0.55 | -1.16 | 1.35 | 2.06E-02 | STMN3                                           | downstream     |
| 16 | 87105442  | G | C | rs61258889             | 8.27E-01 | 0.133 | 0.136 | 0.98 | 0.77 | -1.25 | 5.20E-05 | 0.197 | 0.143 | 1.48 | 1.16 | -1.87 | 1.26 | 2.07E-02 | LOC440390(dist=7845), LOC101928708(dist=140279) | intergenic     |
| 8  | 89385808  | T | C | rs56187488             | 7.55E-01 | 0.479 | 0.474 | 0.98 | 0.83 | -1.15 | 3.08E-05 | 0.576 | 0.493 | 0.71 | 0.59 | -0.86 | 0.86 | 2.07E-02 | MMP16(dist=46091), LOC101929709(dist=1343819)   | intergenic     |
| 17 | 68715867  | C | T | rs115948813            | 4.12E-05 | 0.053 | 0.026 | 2.14 | 1.44 | -3.18 | 1.18E-01 | 0.017 | 0.027 | 0.63 | 0.31 | -1.28 | 1.56 | 2.07E-02 | KCNJ2(dist=539684), CASC17(dist=378048)         | intergenic     |
| 18 | 56917267  | A | G | rs658169               | 6.18E-01 | 0.140 | 0.144 | 1.04 | 0.82 | -1.31 | 6.36E-06 | 0.218 | 0.160 |      |      |       |      |          |                                                 |                |

|    |           |   |   |                        |           |       |       |      |      |       |          |       |       |      |      |       |      |          |                                                    |                |
|----|-----------|---|---|------------------------|-----------|-------|-------|------|------|-------|----------|-------|-------|------|------|-------|------|----------|----------------------------------------------------|----------------|
| 17 | 16148761  | T | C | rs116300688            | 8.29E-01  | 0.036 | 0.039 | 0.93 | 0.6  | -1.44 | 4.15E-05 | 0.066 | 0.033 | 2.06 | 1.4  | -3.05 | 1.52 | 2.18E-02 | PIGL                                               | intronic       |
| 12 | 78035461  | G | A | rs1491048              | 5.02E-01  | 0.156 | 0.165 | 0.94 | 0.75 | -1.17 | 4.37E-05 | 0.237 | 0.172 | 1.49 | 1.19 | -1.86 | 1.24 | 2.19E-02 | E2F7(dist=576101), NAV3(dist=189608)               | intergenic     |
| 17 | 52164063  | A | C | rs115252858            | 5.14E-05  | 0.057 | 0.030 | 1.94 | 1.33 | -2.83 | 3.70E-01 | 0.041 | 0.047 | 0.87 | 0.54 | -1.39 | 1.48 | 2.19E-02 | KIF2B(dist=261490), TOM1L1(dist=813989)            | intergenic     |
| 17 | 52163299  | T | C | rs140301018            | 5.16E-05  | 0.057 | 0.030 | 1.94 | 1.33 | -2.83 | 3.70E-01 | 0.041 | 0.047 | 0.87 | 0.54 | -1.39 | 1.48 | 2.20E-02 | KIF2B(dist=260726), TOM1L1(dist=814753)            | intergenic     |
| 4  | 185389315 | T | C | rs3775583              | 6.57E-01  | 0.166 | 0.178 | 0.92 | 0.74 | -1.14 | 4.53E-05 | 0.235 | 0.161 | 1.60 | 1.28 | -2    | 1.21 | 2.20E-02 | IRF2                                               | intronic       |
| 10 | 56757411  | C | T | rs79945163             | 5.87E-05  | 0.098 | 0.061 | 1.67 | 1.25 | -2.22 | 2.56E-01 | 0.055 | 0.066 | 0.84 | 0.56 | -1.26 | 1.38 | 2.20E-02 | PCDH15(dist=196360), MTRNR2L5(dist=601339)         | intergenic     |
| 12 | 106592123 | G | A | rs1318910              | 5.15E-01  | 0.216 | 0.227 | 1.07 | 0.88 | -1.3  | 2.28E-05 | 0.295 | 0.215 | 0.65 | 0.53 | -0.8  | 0.83 | 2.22E-02 | NUAK1(dist=58312), CKAP4(dist=39536)               | intergenic     |
| 17 | 52260614  | C | G | rs150174365            | 5.22E-05  | 0.057 | 0.030 | 1.94 | 1.33 | -2.82 | 3.69E-01 | 0.041 | 0.047 | 0.87 | 0.54 | -1.39 | 1.48 | 2.22E-02 | KIF2B(dist=258041), TOM1L1(dist=817438)            | intergenic     |
| 17 | 52159960  | G | A | rs115316628            | 5.22E-05  | 0.057 | 0.030 | 1.94 | 1.33 | -2.82 | 3.69E-01 | 0.041 | 0.047 | 0.87 | 0.54 | -1.39 | 1.48 | 2.22E-02 | KIF2B(dist=257387), TOM1L1(dist=818092)            | intergenic     |
| 3  | 61641942  | C | T | rs139405911            | 6.64E-01  | 0.028 | 0.031 | 0.89 | 0.54 | -1.45 | 3.47E-05 | 0.048 | 0.021 | 2.40 | 1.52 | -3.78 | 1.65 | 2.24E-02 | PTPRG                                              | intronic       |
| 3  | 61641572  | T | C | rs143164905            | 6.62E-01  | 0.028 | 0.031 | 0.89 | 0.54 | -1.45 | 3.46E-05 | 0.048 | 0.021 | 2.40 | 1.52 | -3.78 | 1.65 | 2.25E-02 | PTPRG                                              | intronic       |
| 15 | 87945945  | G | A | rs144153772            | 9.56E-01  | 0.027 | 0.029 | 0.94 | 0.57 | -1.55 | 3.75E-05 | 0.047 | 0.023 | 2.13 | 1.35 | -3.36 | 1.65 | 2.26E-02 | AGBL1(dist=373662), LINC00052(dist=174215)         | intergenic     |
| 4  | 34971056  | C | T | rs11096751             | 6.16E-01  | 0.314 | 0.317 | 0.99 | 0.83 | -1.18 | 2.79E-05 | 0.415 | 0.331 | 1.44 | 1.19 | -1.74 | 1.17 | 2.26E-02 | LOC101928622(dist=929541), ARAP2(dist=1096564)     | intergenic     |
| 13 | 72145524  | C | T | rs74095978             | 5.93E-01  | 0.016 | 0.020 | 0.81 | 0.43 | -1.52 | 1.09E-06 | 0.047 | 0.021 | 2.23 | 1.41 | -3.53 | 1.86 | 2.27E-02 | DACH1                                              | intronic       |
| 2  | 77996324  | G | A | rs114525006            | 6.19E-01  | 0.056 | 0.061 | 0.90 | 0.64 | -1.29 | 1.66E-05 | 0.096 | 0.050 | 2.05 | 1.48 | -2.84 | 1.38 | 2.27E-02 | LOC101927967                                       | ncRNA_intronic |
| 16 | 80824502  | T | C | rs115448228            | 7.48E-01  | 0.040 | 0.044 | 0.90 | 0.59 | -1.36 | 2.87E-05 | 0.064 | 0.032 | 2.06 | 1.39 | -3.05 | 1.53 | 2.28E-02 | CDYL2                                              | intronic       |
| 12 | 31285101  | A | G | rs2933405              | 6.64E-01  | 0.236 | 0.244 | 1.05 | 0.87 | -1.27 | 4.51E-05 | 0.325 | 0.242 | 0.66 | 0.54 | -0.81 | 0.84 | 2.28E-02 | DDX11(dist=27376), FAM60A(dist=148419)             | intergenic     |
| 4  | 34971092  | A | C | rs11096752             | 6.24E-01  | 0.315 | 0.317 | 0.99 | 0.83 | -1.18 | 3.02E-05 | 0.415 | 0.331 | 1.43 | 1.19 | -1.73 | 1.17 | 2.29E-02 | LOC101928622(dist=929577), ARAP2(dist=1096528)     | intergenic     |
| 2  | 140858464 | T | A | rs79160976             | 8.68E-01  | 0.026 | 0.025 | 1.03 | 0.62 | -1.72 | 3.04E-05 | 0.042 | 0.020 | 2.09 | 1.29 | -3.39 | 1.71 | 2.29E-02 | YY1P2(dist=1201720), LRP1B(dist=130532)            | intergenic     |
| 5  | 2926385   | C | T | rs2934516              | 6.00E-01  | 0.242 | 0.257 | 1.08 | 0.9  | -1.31 | 5.98E-06 | 0.293 | 0.220 | 0.68 | 0.55 | -0.84 | 0.81 | 2.29E-02 | C5orf38(dist=170874), LINC01377(dist=251564)       | intergenic     |
| 4  | 184321733 | A | G | rs72705530             | 2.31E-02  | 0.061 | 0.041 | 1.51 | 1.06 | -2.15 | 9.10E-06 | 0.051 | 0.040 | 1.30 | 0.85 | -2    | 1.71 | 2.30E-02 | CLDN24(dist=78154), CDKN2AIP(dist=44056)           | intergenic     |
| 16 | 80793722  | A | C | rs9928152              | 5.89E-01  | 0.065 | 0.070 | 0.93 | 0.67 | -1.29 | 1.37E-05 | 0.111 | 0.067 | 1.74 | 1.28 | -2.36 | 1.38 | 2.30E-02 | CDYL2                                              | intronic       |
| 7  | 11859312  | A | C | rs73676203             | 6.70E-01  | 0.060 | 0.067 | 0.89 | 0.63 | -1.25 | 9.30E-06 | 0.097 | 0.054 | 1.87 | 1.35 | -2.59 | 1.41 | 2.30E-02 | THSD7A                                             | intronic       |
| 12 | 12115428  | A | G | rs3983840              | 9.56E-02  | 0.029 | 0.042 | 1.48 | 0.92 | -2.38 | 1.52E-09 | 0.080 | 0.037 | 0.44 | 0.31 | -0.63 | 0.62 | 2.32E-02 | RNU6-19P(dist=36321), BCL2L14(dist=108450)         | intergenic     |
| 15 | 88298630  | T | C | rs74025085             | 9.76E-01  | 0.053 | 0.056 | 0.95 | 0.67 | -1.37 | 1.08E-05 | 0.066 | 0.037 | 1.83 | 1.25 | -2.7  | 1.53 | 2.33E-02 | LINC00052(dist=175713), NTRK3(dist=121358)         | intergenic     |
| 21 | 42539403  | A | G | rs180748018            | 8.15E-01  | 0.029 | 0.031 | 0.94 | 0.58 | -1.51 | 2.55E-05 | 0.045 | 0.022 | 2.07 | 1.3  | -3.3  | 1.75 | 2.33E-02 | BACE2, MIR3197                                     | upstream       |
| 15 | 74074117  | C | A | rs111704463            | 8.77E-01  | 0.065 | 0.067 | 0.97 | 0.7  | -1.35 | 6.37E-05 | 0.086 | 0.051 | 1.75 | 1.25 | -2.47 | 1.41 | 2.33E-02 | C15orf59-AS1(dist=11974), TBC1D21(dist=91810)      | intergenic     |
| 15 | 82573325  | G | A | rs11854157             | 6.28E-01  | 0.348 | 0.368 | 0.92 | 0.77 | -1.09 | 3.11E-05 | 0.421 | 0.322 | 1.53 | 1.26 | -1.85 | 1.16 | 2.34E-02 | SAXO2                                              | intronic       |
| 17 | 62683502  | A | G | rs148649035            | 6.77E-01  | 0.064 | 0.062 | 1.02 | 0.73 | -1.43 | 6.02E-05 | 0.080 | 0.051 | 1.63 | 1.15 | -2.31 | 1.45 | 2.35E-02 | SMURF2(dist=25116), LOC146880(dist=622278)         | intergenic     |
| 2  | 69552451  | G | T | rs77753566             | 2.27E-02  | 0.025 | 0.033 | 0.75 | 0.45 | -1.25 | 6.27E-05 | 0.065 | 0.049 | 1.35 | 0.92 | -1.98 | 0.54 | 2.35E-02 | GFPT1(NM_001244710:c.*870C>A, NM_002056:c.*870C>A) | UTR3           |
| 1  | 210998917 | G | A | rs7515909              | 5.62E-06  | 0.181 | 0.264 | 0.62 | 0.5  | -0.76 | 6.75E-02 | 0.283 | 0.245 | 1.22 | 0.99 | -1.5  | 0.84 | 2.36E-02 | KCNH1                                              | intronic       |
| 15 | 74074407  | C | T | rs146613032            | 8.86E-01  | 0.066 | 0.068 | 0.97 | 0.7  | -1.34 | 6.44E-05 | 0.086 | 0.051 | 1.75 | 1.25 | -2.46 | 1.41 | 2.37E-02 | C15orf59-AS1(dist=12264), TBC1D21(dist=91520)      | intergenic     |
| 4  | 185395385 | T | C | rs1863315              | 6.05E-01  | 0.177 | 0.190 | 0.92 | 0.74 | -1.13 | 2.96E-05 | 0.238 | 0.166 | 1.57 | 1.26 | -1.96 | 1.22 | 2.37E-02 | IRF2                                               | intronic       |
| 9  | 22457214  | T | C | rs115519403            | 5.89E-01  | 0.026 | 0.031 | 0.84 | 0.5  | -1.39 | 4.02E-05 | 0.064 | 0.031 | 2.13 | 1.43 | -3.16 | 1.58 | 2.39E-02 | DMRTA1(dist=4742), LINC01239(dist=188985)          | intergenic     |
| 17 | 52162589  | G | A | rs112764318            | 6.33E-05  | 0.057 | 0.031 | 1.92 | 1.32 | -2.8  | 3.68E-01 | 0.041 | 0.047 | 0.87 | 0.54 | -1.38 | 1.47 | 2.39E-02 | KIF2B(dist=260016), TOM1L1(dist=815643)            | intergenic     |
| 15 | 82540174  | A | G | rs8028284              | 4.30E-01  | 0.324 | 0.343 | 0.92 | 0.77 | -1.09 | 8.34E-06 | 0.409 | 0.310 | 1.55 | 1.28 | -1.87 | 1.17 | 2.39E-02 | EFTUD1                                             | intronic       |
| 17 | 52161948  | T | C | rs113627571            | 6.38E-05  | 0.057 | 0.031 | 1.92 | 1.32 | -2.79 | 3.68E-01 | 0.041 | 0.047 | 0.87 | 0.54 | -1.38 | 1.47 | 2.40E-02 | KIF2B(dist=259375), TOM1L1(dist=816104)            | intergenic     |
| 5  | 168569034 | G | A | rs7710708              | 6.58E-01  | 0.033 | 0.038 | 0.86 | 0.55 | -1.35 | 1.15E-06 | 0.060 | 0.032 | 1.97 | 1.32 | -2.96 | 1.64 | 2.40E-02 | SLIT3                                              | intronic       |
| 14 | 42332965  | G | A | rs115424626            | 5.42E-01  | 0.028 | 0.034 | 0.81 | 0.5  | -1.32 | 3.20E-05 | 0.070 | 0.035 | 2.07 | 1.42 | -3.02 | 1.53 | 2.40E-02 | LRFN5                                              | intronic       |
| 7  | 94536850  | C | G | rs116378962            | 8.71E-01  | 0.062 | 0.066 | 0.93 | 0.66 | -1.3  | 5.22E-05 | 0.101 | 0.057 | 1.86 | 1.35 | -2.55 | 1.37 | 2.42E-02 | PPP1R9A                                            | upstream       |
| 1  | 240098019 | G | A | rs7523792              | 5.91E-01  | 0.383 | 0.367 | 1.07 | 0.91 | -1.27 | 2.44E-05 | 0.300 | 0.387 | 0.68 | 0.55 | -0.83 | 0.85 | 2.43E-02 | CHRM3(dist=25302), RPS7P5(dist=72805)              | intergenic     |
| 9  | 128906384 | T | C | rs149014818            | 1.289E-02 | 0.025 | 0.041 | 0.58 | 0.35 | -0.97 | 3.51E-05 | 0.046 | 0.026 | 1.81 | 1.15 | -2.87 | 0.58 | 2.43E-02 | PBX3(dist=176729), LOC101929116(dist=126019)       | intergenic     |
| 9  | 22404361  | A | G | rs116783854            | 5.93E-01  | 0.018 | 0.022 | 0.82 | 0.44 | -1.5  | 6.46E-05 | 0.055 | 0.026 | 2.16 | 1.41 | -3.3  | 1.67 | 2.43E-02 | CDKN2B-AS1(dist=283268), DMRTA1(dist=42479)        | intergenic     |
| 2  | 77991771  | T | C | rs116537780            | 2.43E-01  | 0.021 | 0.028 | 0.72 | 0.41 | -1.26 | 4.12E-06 | 0.071 | 0.033 | 2.25 | 1.54 | -3.28 | 1.57 | 2.44E-02 | LOC101927967                                       | ncRNA_intronic |
| 4  | 146745433 | C | T | rs76095491             | 5.09E-01  | 0.068 | 0.077 | 0.88 | 0.64 | -1.21 | 4.27E-06 | 0.118 | 0.067 | 1.87 | 1.39 | -2.51 | 1.33 | 2.45E-02 | ZNF827                                             | intronic       |
| 16 | 83869098  | G | A | rs13335713             | 7.32E-01  | 0.099 | 0.105 | 0.94 | 0.72 | -1.23 | 1.09E-05 | 0.142 | 0.089 | 1.70 | 1.29 | -2.23 | 1.30 | 2.45E-02 | HSBP1(dist=22491), MLYCD(dist=63632)               | intergenic     |
| 16 | 87105940  | C | G | rs72813971;rs386793799 | 7.98E-01  | 0.134 | 0.137 | 0.98 | 0.77 | -1.24 | 6.13E-05 | 0.198 | 0.144 | 1.47 | 1.16 | -1.86 | 1.25 | 2.46E-02 | LOC440390(dist=8343), LOC101928708(dist=139781)    | intergenic     |
| 4  | 134113822 | T | C | rs77099945             | 9.04E-01  | 0.077 | 0.077 | 1.00 | 0.74 | -1.36 | 5.94E-05 | 0.122 | 0.084 | 1.52 | 1.14 | -2.03 | 1.36 | 2.47E-02 | PCDH10(NM_032961:c.*2507T>C)                       | UTR3           |
| 16 | 77600545  | A | G | rs8046820              | 7.28E-01  | 0.024 | 0.026 | 0.93 | 0.55 | -1.57 | 6.21E-05 | 0.049 | 0.023 | 2.17 | 1.38 | -3.39 | 1.65 | 2.48E-02 | ADAMTS18(dist=131534), NUDT7(dist=155844)          | intergenic     |
| 4  | 2775985   | G | T | rs13108936             | 6.46E-01  | 0.032 | 0.033 | 0.96 | 0.61 | -1.53 | 6.16E-07 | 0.063 | 0.038 | 1.68 | 1.14 | -2.49 | 1.71 | 2.50E-02 | TNIP2(dist=17882), SH3BP2(dist=18765)              | intergenic     |
| 12 | 106590567 | C | T | rs1427787              | 4.07E-01  | 0.235 | 0.251 | 1.09 | 0.9  | -1.32 | 1.06E-05 | 0.323 | 0.232 | 0.63 | 0.52 | -0.77 | 0.85 | 2.50E-02 | NUAK1(dist=56755), CKAP4(dist=41092)               | intergenic     |
| 9  | 128906413 | A | T | rs75304124             | 2.36E-02  | 0.024 | 0.041 | 0.58 | 0.35 | -0.96 | 5.61E-05 | 0.045 | 0.025 | 1.81 | 1.14 | -2.88 | 0.58 | 2.50E-02 | PBX3(dist=176758), LOC101929116(dist=125990)       | intergenic     |
| 4  | 134159321 | A | G | rs79704320             | 8.16E-01  | 0.083 | 0.088 | 0.93 | 0.7  | -1.25 | 2.64E-05 | 0.109 | 0.068 | 1.68 | 1.24 | -2.29 | 1.40 | 2.51E-02 | PCDH10(dist=43556), PABPC4L(dist=958168)           | intergenic     |
| 7  | 83939664  | T | C | rs9986714              | 7.51E-01  | 0.303 | 0.315 | 0.94 | 0.79 | -1.13 | 1.95E-05 | 0.359 | 0.273 | 1.49 | 1.22 | -1.81 | 1.18 | 2.52E-02 | SEMA3A(dist=115447), LOC101927378(dist=222128)     | intergenic     |
| 2  | 140862201 | G | A | rs79298919             | 7.93E-01  | 0.038 | 0.037 | 1.02 | 0.67 | -1.57 | 2.57E-05 | 0.053 | 0.030 | 1.85 | 1.21 | -2.84 | 1.57 | 2.52E-02 | YY1P2(dist=1205457), LRP1B(dist=126795)            | intergenic     |
| 2  | 77997721  | C | T | rs113939168            | 5.34E-01  | 0.117 | 0.131 | 0.88 | 0.68 | -1.13 | 1.24E-05 | 0.180 | 0.110 | 1.78 | 1.39 | -2.28 | 1.   |          |                                                    |                |

|    |           |   |   |                         |           |       |       |      |      |       |          |       |       |      |      |       |      |          |                                                |                |
|----|-----------|---|---|-------------------------|-----------|-------|-------|------|------|-------|----------|-------|-------|------|------|-------|------|----------|------------------------------------------------|----------------|
| 7  | 8161751   | T | C | rs73235843              | 8.17E-01  | 0.282 | 0.292 | 0.95 | 0.79 | -1.14 | 2.68E-05 | 0.345 | 0.273 | 1.40 | 1.15 | -1.71 | 1.20 | 2.63E-02 | ICA1                                           | intronic       |
| 2  | 134462792 | C | A | rs4954074               | 4.96E-01  | 0.107 | 0.111 | 0.96 | 0.74 | -1.24 | 1.33E-05 | 0.194 | 0.136 | 1.53 | 1.2  | -1.94 | 1.26 | 2.67E-02 | NCKAP5(dist=136761), MIR3679(dist=421904)      | intergenic     |
| 14 | 72316472  | G | A | rs72732397              | 4.90E-05  | 0.108 | 0.058 | 1.99 | 1.5  | -2.63 | 2.92E-01 | 0.068 | 0.091 | 0.74 | 0.51 | -1.06 | 1.32 | 2.70E-02 | SIPA1L1(dist=108526), RGS6(dist=82345)         | intergenic     |
| 13 | 58416649  | C | T | rs71430827              | 6.01E-01  | 0.022 | 0.027 | 0.80 | 0.46 | -1.39 | 4.90E-05 | 0.051 | 0.023 | 2.30 | 1.48 | -3.59 | 1.68 | 2.71E-02 | PCDH17(dist=113584), LOC101926897(dist=323312) | intergenic     |
| 16 | 16156610  | A | T | rs45588034              | 6.72E-01  | 0.181 | 0.191 | 0.94 | 0.76 | -1.16 | 4.37E-05 | 0.228 | 0.161 | 1.54 | 1.23 | -1.93 | 1.24 | 2.71E-02 | ABCC1                                          | intronic       |
| 7  | 11196134  | C | G | rs10270849              | 7.119E-01 | 0.064 | 0.066 | 0.96 | 0.69 | -1.33 | 3.41E-05 | 0.090 | 0.051 | 1.82 | 1.3  | -2.54 | 1.38 | 2.72E-02 | NONE(dist=NONE), NONE(dist=NONE)               | intergenic     |
| 7  | 22035552  | G | A | rs28709686              | 8.60E-01  | 0.098 | 0.103 | 0.95 | 0.72 | -1.25 | 3.84E-05 | 0.122 | 0.071 | 1.80 | 1.35 | -2.42 | 1.29 | 2.73E-02 | CDC47L(dist=50010), RAPGEF5(dist=122356)       | intergenic     |
| 2  | 77998256  | G | C | rs79353565              | 5.07E-01  | 0.116 | 0.131 | 0.87 | 0.68 | -1.12 | 1.22E-05 | 0.180 | 0.109 | 1.78 | 1.39 | -2.29 | 1.25 | 2.73E-02 | LOC101927967                                   | ncRNA_intronic |
| 4  | 146746651 | G | A | rs6855560               | 5.57E-01  | 0.068 | 0.076 | 0.89 | 0.65 | -1.22 | 4.73E-06 | 0.108 | 0.063 | 1.83 | 1.34 | -2.48 | 1.35 | 2.74E-02 | ZNF827                                         | intronic       |
| 16 | 26489132  | C | T | rs62030921              | 4.78E-05  | 0.138 | 0.089 | 1.65 | 1.29 | -2.1  | 2.01E-01 | 0.082 | 0.103 | 0.78 | 0.55 | -1.09 | 1.27 | 2.74E-02 | HS3ST4(dist=340123), C16orf82(dist=589087)     | intergenic     |
| 9  | 137957543 | C | T | rs77347992              | 9.28E-01  | 0.032 | 0.034 | 0.95 | 0.6  | -1.5  | 4.94E-07 | 0.050 | 0.024 | 2.12 | 1.36 | -3.3  | 1.62 | 2.75E-02 | FCN1(dist=147737), OLFM1(dist=9546)            | intergenic     |
| 4  | 185381588 | C | A | rs58520796              | 5.86E-01  | 0.169 | 0.183 | 0.91 | 0.73 | -1.13 | 3.23E-05 | 0.232 | 0.161 | 1.58 | 1.27 | -1.98 | 1.21 | 2.77E-02 | IRF2                                           | intronic       |
| 6  | 84670703  | A | C | rs77639159              | 8.63E-01  | 0.029 | 0.031 | 0.93 | 0.57 | -1.5  | 5.03E-05 | 0.053 | 0.025 | 2.21 | 1.43 | -3.41 | 1.62 | 2.79E-02 | CYB5R4                                         | downstream     |
| 6  | 12442273  | G | A | rs9471822               | 8.75E-01  | 0.027 | 0.030 | 0.92 | 0.56 | -1.51 | 1.66E-05 | 0.046 | 0.023 | 2.03 | 1.28 | -3.22 | 1.81 | 2.82E-02 | RNU6-48P(dist=49687), PHACTR1(dist=274764)     | intergenic     |
| 6  | 111294558 | A | T | rs7765629               | 2.89E-05  | 0.279 | 0.210 | 1.46 | 1.21 | -1.75 | 1.23E-01 | 0.187 | 0.209 | 0.87 | 0.68 | -1.1  | 1.20 | 2.82E-02 | GTF3C6(dist=5467), RPF2(dist=8662)             | intergenic     |
| 4  | 154786401 | C | T | rs28718432              | 7.06E-01  | 0.112 | 0.123 | 0.90 | 0.69 | -1.16 | 4.02E-05 | 0.163 | 0.105 | 1.66 | 1.28 | -2.15 | 1.27 | 2.83E-02 | SFRP2(dist=76173), DCHS2(dist=369126)          | intergenic     |
| 5  | 30899517  | A | G | rs6871087               | 1.18E-05  | 0.200 | 0.148 | 1.44 | 1.17 | -1.77 | 8.31E-02 | 0.116 | 0.137 | 0.83 | 0.62 | -1.11 | 1.24 | 2.84E-02 | LOC101929681(dist=1503434), CDH6(dist=294245)  | intergenic     |
| 15 | 83786659  | C | T | rs144607824             | 6.67E-01  | 0.045 | 0.050 | 0.90 | 0.61 | -1.33 | 3.16E-05 | 0.077 | 0.040 | 2.00 | 1.4  | -2.87 | 1.43 | 2.84E-02 | TMG6SF1                                        | intronic       |
| 16 | 62329796  | G | C | rs386791480;rs149809569 | 9.39E-01  | 0.065 | 0.069 | 0.94 | 0.67 | -1.3  | 5.80E-05 | 0.091 | 0.055 | 1.73 | 1.24 | -2.41 | 1.39 | 2.86E-02 | CDH8(dist=259057), NONE(dist=NONE)             | intergenic     |
| 4  | 158548696 | A | G | rs1490525               | 5.22E-05  | 0.400 | 0.321 | 0.71 | 0.6  | -0.84 | 1.78E-01 | 0.314 | 0.347 | 1.16 | 0.95 | -1.42 | 0.86 | 2.86E-02 | LOC340017(dist=51393), FAM198B(dist=497036)    | intergenic     |
| 16 | 62331056  | C | G | rs148204082             | 9.44E-01  | 0.065 | 0.069 | 0.94 | 0.67 | -1.3  | 6.19E-05 | 0.094 | 0.058 | 1.69 | 1.22 | -2.35 | 1.39 | 2.86E-02 | CDH8(dist=260317), NONE(dist=NONE)             | intergenic     |
| 16 | 62328266  | C | T | rs144583394             | 9.41E-01  | 0.065 | 0.069 | 0.94 | 0.67 | -1.3  | 6.15E-05 | 0.091 | 0.055 | 1.73 | 1.24 | -2.41 | 1.39 | 2.86E-02 | CDH8(dist=257527), NONE(dist=NONE)             | intergenic     |
| 9  | 137955732 | A | T | rs145379290             | 9.04E-01  | 0.032 | 0.034 | 0.94 | 0.59 | -1.49 | 4.58E-07 | 0.050 | 0.024 | 2.13 | 1.36 | -3.32 | 1.61 | 2.88E-02 | FCN1(dist=145926), OLFM1(dist=11357)           | intergenic     |
| 6  | 111266707 | G | A | rs67512131              | 2.45E-05  | 0.280 | 0.210 | 1.46 | 1.22 | -1.76 | 1.33E-01 | 0.185 | 0.207 | 0.87 | 0.68 | -1.1  | 1.20 | 2.88E-02 | AMP1(dist=49792), GTF3C6(dist=13056)           | intergenic     |
| 9  | 137955600 | C | T | rs148847335             | 8.03E-01  | 0.032 | 0.034 | 0.94 | 0.59 | -1.49 | 4.56E-07 | 0.050 | 0.024 | 2.13 | 1.36 | -3.32 | 1.61 | 2.88E-02 | FCN1(dist=145794), OLFM1(dist=11489)           | intergenic     |
| 13 | 106399673 | G | A | rs111866771             | 8.03E-01  | 0.124 | 0.132 | 0.93 | 0.73 | -1.19 | 8.11E-06 | 0.143 | 0.093 | 1.64 | 1.25 | -2.15 | 1.31 | 2.88E-02 | LINC00343                                      | ncRNA_intronic |
| 9  | 83835306  | C | T | rs138488858             | 8.39E-01  | 0.063 | 0.067 | 0.94 | 0.68 | -1.32 | 1.03E-05 | 0.084 | 0.052 | 1.68 | 1.19 | -2.37 | 1.47 | 2.89E-02 | LINC01507(dist=1185836), TLE1(dist=363292)     | intergenic     |
| 4  | 172225031 | T | A | rs1250449               | 2.79E-01  | 0.429 | 0.260 | 1.04 | 0.88 | -1.22 | 2.92E-06 | 0.327 | 0.405 | 0.71 | 0.58 | -0.87 | 0.85 | 2.89E-02 | MIR6082(dist=117588), GALNTL6(dist=509544)     | intergenic     |
| 4  | 154803947 | G | T | rs1456405               | 4.04E-01  | 0.090 | 0.104 | 0.85 | 0.64 | -1.12 | 4.28E-05 | 0.160 | 0.097 | 1.78 | 1.37 | -2.3  | 1.28 | 2.90E-02 | SFRP2(dist=93719), DCHS2(dist=351580)          | intergenic     |
| 13 | 106399415 | T | A | rs57754568              | 8.01E-01  | 0.124 | 0.132 | 0.93 | 0.72 | -1.19 | 8.11E-06 | 0.143 | 0.093 | 1.64 | 1.25 | -2.15 | 1.31 | 2.91E-02 | LINC00343                                      | ncRNA_intronic |
| 9  | 137953922 | C | T | rs57287004              | 8.99E-01  | 0.032 | 0.034 | 0.94 | 0.59 | -1.49 | 4.67E-07 | 0.050 | 0.024 | 2.13 | 1.37 | -3.32 | 1.61 | 2.92E-02 | FCN1(dist=144116), OLFM1(dist=13167)           | intergenic     |
| 4  | 34970706  | C | T | rs7689655               | 6.18E-01  | 0.319 | 0.322 | 0.99 | 0.83 | -1.17 | 5.95E-05 | 0.418 | 0.336 | 1.41 | 1.17 | -1.71 | 1.16 | 2.92E-02 | LOC101928622(dist=929191), ARAP2(dist=1096914) | intergenic     |
| 4  | 141041260 | G | A | rs9991024               | 2.93E-02  | 0.071 | 0.092 | 0.76 | 0.55 | -1.03 | 4.41E-05 | 0.132 | 0.097 | 1.41 | 1.07 | -1.87 | 0.65 | 2.92E-02 | MAML3                                          | intronic       |
| 17 | 39030656  | C | T | rs114740301             | 3.62E-01  | 0.030 | 0.040 | 0.75 | 0.47 | -1.2  | 6.66E-06 | 0.073 | 0.035 | 2.20 | 1.52 | -3.2  | 1.49 | 2.93E-02 | KRT12(dist=7194), KRT20(dist=1485)             | intergenic     |
| 5  | 71069321  | G | A | rs58973459              | 9.90E-01  | 0.076 | 0.081 | 0.93 | 0.68 | -1.26 | 5.74E-05 | 0.094 | 0.057 | 1.71 | 1.23 | -2.38 | 1.36 | 2.94E-02 | CARTPT(dist=52446), MAP1B(dist=333797)         | intergenic     |
| 6  | 70951252  | G | A | rs75139444              | 8.38E-01  | 0.061 | 0.065 | 0.94 | 0.67 | -1.31 | 6.07E-05 | 0.089 | 0.048 | 1.94 | 1.39 | -2.72 | 1.37 | 2.95E-02 | COL9A1                                         | intronic       |
| 17 | 39029553  | G | C | rs116462358             | 3.30E-01  | 0.029 | 0.039 | 0.74 | 0.46 | -1.18 | 6.02E-06 | 0.074 | 0.035 | 2.21 | 1.53 | -3.2  | 1.49 | 2.98E-02 | KRT12(dist=6091), KRT20(dist=2588)             | intergenic     |
| 4  | 92129584  | C | T | rs13141161              | 3.61E-01  | 0.393 | 0.406 | 0.95 | 0.8  | -1.12 | 1.50E-05 | 0.487 | 0.391 | 1.48 | 1.23 | -1.79 | 1.15 | 2.99E-02 | CCSER1                                         | intronic       |
| 2  | 77986002  | G | A | rs182397808             | 2.89E-01  | 0.026 | 0.034 | 0.76 | 0.46 | -1.25 | 5.10E-07 | 0.068 | 0.031 | 2.30 | 1.56 | -3.38 | 1.54 | 3.04E-02 | LOC101927967                                   | ncRNA_intronic |
| 4  | 2776269   | G | A | rs35389119              | 3.81E-01  | 0.025 | 0.028 | 0.87 | 0.52 | -1.46 | 1.57E-08 | 0.059 | 0.033 | 1.82 | 1.21 | -2.73 | 1.73 | 3.04E-02 | TNIP2(dist=18166), SH3BP2(dist=18481)          | intergenic     |
| 2  | 241086537 | G | A | rs145528596             | 6.20E-01  | 0.021 | 0.024 | 0.89 | 0.51 | -1.56 | 6.28E-05 | 0.047 | 0.022 | 2.20 | 1.39 | -3.47 | 1.71 | 3.05E-02 | OTOS(dist=6464), GPC1(dist=288578)             | intergenic     |
| 12 | 106591866 | G | C | rs1427790               | 4.21E-01  | 0.228 | 0.243 | 1.08 | 0.89 | -1.31 | 2.63E-05 | 0.309 | 0.224 | 0.65 | 0.53 | -0.79 | 0.85 | 3.05E-02 | NUAK1(dist=58055), CKAP4(dist=39793)           | intergenic     |
| 6  | 130610655 | G | T | rs626066                | 3.83E-01  | 0.310 | 0.322 | 0.95 | 0.79 | -1.13 | 4.91E-06 | 0.376 | 0.306 | 1.37 | 1.13 | -1.66 | 1.23 | 3.05E-02 | SAMD3                                          | intronic       |
| 8  | 14341766  | T | C | rs145972868             | 9.11E-01  | 0.048 | 0.047 | 1.01 | 0.69 | -1.48 | 4.52E-05 | 0.068 | 0.034 | 2.10 | 1.43 | -3.08 | 1.43 | 3.06E-02 | SGCZ                                           | intronic       |
| 6  | 111298653 | G | A | rs9386971               | 5.09E-05  | 0.274 | 0.207 | 1.45 | 1.2  | -1.74 | 1.62E-01 | 0.187 | 0.207 | 0.88 | 0.69 | -1.12 | 1.20 | 3.06E-02 | GTF3C6(dist=9562), RPF2(dist=4567)             | intergenic     |
| 10 | 77599465  | C | T | rs187962909             | 3.37E-01  | 0.031 | 0.033 | 0.92 | 0.58 | -1.47 | 3.77E-05 | 0.085 | 0.050 | 1.77 | 1.26 | -2.49 | 1.47 | 3.08E-02 | C10orf11                                       | intronic       |
| 5  | 30899448  | A | T | rs6870943               | 2.81E-05  | 0.210 | 0.157 | 1.43 | 1.16 | -1.75 | 8.35E-02 | 0.116 | 0.137 | 0.83 | 0.62 | -1.11 | 1.23 | 3.10E-02 | LOC101929681(dist=1503365), CDH6(dist=294314)  | intergenic     |
| 5  | 126499887 | C | T | rs73341291              | 9.20E-01  | 0.030 | 0.032 | 0.93 | 0.58 | -1.49 | 3.99E-05 | 0.044 | 0.021 | 2.12 | 1.33 | -3.4  | 1.63 | 3.10E-02 | C5orf63(dist=90703), MEGF10(dist=126569)       | intergenic     |
| 15 | 82472289  | C | A | rs66701409              | 4.99E-01  | 0.354 | 0.378 | 0.90 | 0.76 | -1.07 | 2.70E-05 | 0.428 | 0.327 | 1.54 | 1.27 | -1.86 | 1.16 | 3.10E-02 | EFTUD1                                         | intronic       |
| 12 | 12113306  | G | T | rs188998780             | 8.07E-02  | 0.022 | 0.035 | 0.61 | 0.36 | -1.05 | 3.69E-11 | 0.070 | 0.027 | 2.69 | 1.83 | -3.95 | 1.57 | 3.15E-02 | RNU6-19P(dist=34199), BCL2L14(dist=110572)     | intergenic     |
| 8  | 139197980 | C | A | rs6980948               | 8.72E-01  | 0.052 | 0.056 | 0.93 | 0.65 | -1.34 | 2.02E-05 | 0.084 | 0.047 | 1.86 | 1.31 | -2.63 | 1.41 | 3.16E-02 | FAM135B                                        | intronic       |
| 3  | 73447726  | G | T | rs78795849              | 4.22E-01  | 0.087 | 0.102 | 0.84 | 0.63 | -1.12 | 2.95E-06 | 0.134 | 0.074 | 1.93 | 1.46 | -2.56 | 1.29 | 3.17E-02 | PDZRN3                                         | intronic       |
| 6  | 111320794 | G | A | rs3763195               | 4.98E-05  | 0.276 | 0.209 | 1.44 | 1.2  | -1.74 | 1.50E-01 | 0.188 | 0.209 | 0.88 | 0.69 | -1.12 | 1.20 | 3.18E-02 | RPF2                                           | intronic       |
| 15 | 82573127  | T | C | rs60064174              | 2.61E-01  | 0.288 | 0.316 | 0.87 | 0.73 | -1.04 | 1.89E-06 | 0.377 | 0.273 | 1.61 | 1.33 | -1.96 | 1.16 | 3.19E-02 | SAXO2                                          | intronic       |
| 13 | 20840297  | C | T | rs79413175              | 3.06E-02  | 0.055 | 0.040 | 1.40 | 0.97 | -2.02 | 7.50E-06 | 0.053 | 0.030 | 1.81 | 1.18 | -2.76 | 1.61 | 3.19E-02 | GJB6(dist=33763), CRYL1(dist=137509)           | intergenic     |
| 2  | 221806151 | T | C | rs115447464             | 7.79E-01  | 0.034 | 0.037 | 0.92 | 0.59 | -1.44 | 3.28E-06 | 0.055 | 0.029 | 1.91 | 1.25 | -2.92 | 1.59 | 3.20E-02 | MIR4268(dist=1034865), EPHA4(dist=476596)      | intergenic     |
| 10 | 132590848 | G | C | rs56134754              | 6.21E-05  | 0.209 | 0.152 | 1.47 | 1.2  | -     |          |       |       |      |      |       |      |          |                                                |                |

|    |           |   |   |                         |          |       |       |      |      |       |          |       |       |      |      |       |      |          |                                                  |                |
|----|-----------|---|---|-------------------------|----------|-------|-------|------|------|-------|----------|-------|-------|------|------|-------|------|----------|--------------------------------------------------|----------------|
| 16 | 6803701   | T | A | rs116918951             | 4.77E-01 | 0.026 | 0.031 | 0.82 | 0.49 | -1.36 | 2.54E-05 | 0.053 | 0.028 | 1.94 | 1.26 | -2.99 | 1.69 | 3.40E-02 | RBFOX1                                           | intronic       |
| 10 | 113758085 | A | G | rs114733639             | 8.46E-01 | 0.020 | 0.021 | 0.91 | 0.51 | -1.63 | 2.14E-05 | 0.039 | 0.021 | 1.86 | 1.14 | -3.06 | 1.94 | 3.40E-02 | ADRA2A(dist=917423), GPAM(dist=151537)           | intergenic     |
| 3  | 13721855  | G | A | rs7611688               | 7.36E-01 | 0.033 | 0.037 | 0.90 | 0.57 | -1.41 | 3.73E-05 | 0.054 | 0.027 | 2.00 | 1.31 | -3.07 | 1.58 | 3.41E-02 | LINC00620                                        | ncRNA_intronic |
| 20 | 62272658  | T | C | rs2150910;rs2315005     | 1.16E-05 | 0.067 | 0.039 | 0.57 | 0.4  | -0.81 | 3.18E-01 | 0.048 | 0.058 | 1.22 | 0.79 | -1.89 | 0.65 | 3.42E-02 | STMN3(NM_015894:c.*33A>G, NM_001276310:c.*33A>G) | UTR3           |
| 15 | 83622374  | C | G | rs8023400               | 4.36E-01 | 0.066 | 0.076 | 0.86 | 0.62 | -1.19 | 6.03E-06 | 0.115 | 0.065 | 1.88 | 1.39 | -2.53 | 1.32 | 3.43E-02 | HOMER2                                           | upstream       |
| 12 | 106591677 | A | T | rs1427789               | 3.85E-01 | 0.226 | 0.242 | 1.09 | 0.9  | -1.33 | 2.53E-05 | 0.308 | 0.223 | 0.64 | 0.52 | -0.79 | 0.85 | 3.44E-02 | NUAK1(dist=57866), CKAP4(dist=39982)             | intergenic     |
| 2  | 77977725  | C | T | rs28815188              | 5.17E-01 | 0.100 | 0.114 | 0.86 | 0.66 | -1.13 | 1.39E-05 | 0.162 | 0.099 | 1.76 | 1.36 | -2.28 | 1.26 | 3.44E-02 | LOC101927967                                     | ncRNA_intronic |
| 6  | 111291060 | G | A | rs76602832              | 5.65E-05 | 0.275 | 0.209 | 1.44 | 1.2  | -1.74 | 1.49E-01 | 0.188 | 0.209 | 0.88 | 0.69 | -1.11 | 1.19 | 3.44E-02 | GTF3C6(dist=1969), RPF2(dist=12160)              | intergenic     |
| 6  | 32456288  | C | T | rs115479558             | 6.24E-05 | 0.062 | 0.097 | 0.62 | 0.44 | -0.85 | 2.77E-02 | 0.082 | 0.112 | 0.72 | 0.51 | -1    | 0.65 | 3.49E-02 | HLA-DRA(dist=43462), HLA-DRB5(dist=28866)        | intergenic     |
| 7  | 134423737 | A | C | rs78694204              | 7.49E-01 | 0.027 | 0.025 | 1.07 | 0.64 | -1.78 | 4.12E-05 | 0.061 | 0.041 | 1.49 | 1    | -2.22 | 1.72 | 3.49E-02 | BPGM(dist=59170), CALD1(dist=40427)              | intergenic     |
| 2  | 171473276 | C | T | rs13022715              | 8.61E-01 | 0.257 | 0.254 | 1.02 | 0.84 | -1.23 | 5.55E-05 | 0.352 | 0.297 | 1.28 | 1.06 | -1.56 | 1.20 | 3.50E-02 | MYO3B                                            | intronic       |
| 4  | 164806053 | A | G | rs73868927              | 5.45E-01 | 0.021 | 0.026 | 0.80 | 0.46 | -1.39 | 6.04E-05 | 0.050 | 0.021 | 2.50 | 1.6  | -3.91 | 1.57 | 3.51E-02 | MARCH1                                           | intronic       |
| 14 | 103519468 | C | T | rs35771930              | 6.06E-01 | 0.079 | 0.076 | 1.04 | 0.77 | -1.41 | 2.53E-05 | 0.124 | 0.092 | 1.41 | 1.06 | -1.88 | 1.34 | 3.52E-02 | CDC42BPB                                         | intronic       |
| 10 | 17494200  | G | C | rs115963509             | 7.28E-01 | 0.040 | 0.044 | 0.90 | 0.6  | -1.36 | 4.28E-05 | 0.064 | 0.032 | 2.07 | 1.4  | -3.08 | 1.47 | 3.52E-02 | ST8SIA6                                          | intronic       |
| 5  | 144354463 | G | A | rs13156339              | 3.24E-01 | 0.089 | 0.098 | 0.91 | 0.68 | -1.2  | 6.33E-06 | 0.164 | 0.109 | 1.60 | 1.24 | -2.07 | 1.28 | 3.53E-02 | KCTD16(dist=497519), PRELID2(dist=781444)        | intergenic     |
| 10 | 84981096  | T | C | rs7907663               | 5.50E-01 | 0.427 | 0.421 | 0.97 | 0.83 | -1.15 | 3.36E-05 | 0.528 | 0.442 | 0.71 | 0.59 | -0.85 | 0.87 | 3.54E-02 | NRG3(dist=234161), GHITM(dist=918089)            | intergenic     |
| 10 | 84980956  | G | A | rs7918420               | 5.48E-01 | 0.427 | 0.421 | 0.98 | 0.83 | -1.15 | 3.27E-05 | 0.528 | 0.442 | 0.71 | 0.59 | -0.85 | 0.87 | 3.54E-02 | NRG3(dist=234021), GHITM(dist=918229)            | intergenic     |
| 9  | 22412573  | G | A | rs115677197             | 5.10E-01 | 0.019 | 0.023 | 0.80 | 0.44 | -1.44 | 4.86E-05 | 0.054 | 0.026 | 2.18 | 1.42 | -3.34 | 1.60 | 3.56E-02 | CDKN2B-AS1(dist=291480), DMRTA1(dist=34267)      | intergenic     |
| 6  | 111236221 | C | T | rs9372272               | 6.09E-05 | 0.238 | 0.177 | 1.45 | 1.19 | -1.77 | 1.63E-01 | 0.150 | 0.168 | 0.87 | 0.67 | -1.13 | 1.21 | 3.58E-02 | AMD1(dist=19306), GTF3C6(dist=43542)             | intergenic     |
| 2  | 236817028 | C | A | rs114917352             | 7.91E-01 | 0.030 | 0.033 | 0.91 | 0.57 | -1.46 | 9.84E-06 | 0.050 | 0.027 | 1.92 | 1.24 | -2.99 | 1.67 | 3.59E-02 | AGAP1                                            | intronic       |
| 9  | 71756263  | C | T | rs35906864              | 7.25E-01 | 0.112 | 0.117 | 0.95 | 0.73 | -1.23 | 2.67E-05 | 0.149 | 0.096 | 1.64 | 1.25 | -2.14 | 1.26 | 3.61E-02 | TJP2                                             | intronic       |
| 2  | 241017468 | A | G | rs13385295              | 6.52E-01 | 0.035 | 0.041 | 0.86 | 0.56 | -1.33 | 4.47E-05 | 0.067 | 0.033 | 2.07 | 1.4  | -3.05 | 1.46 | 3.63E-02 | OR6B3(dist=31979), MYEOV2(dist=48512)            | intergenic     |
| 2  | 184033659 | G | A | rs114426262             | 6.71E-01 | 0.029 | 0.033 | 0.89 | 0.55 | -1.44 | 1.96E-07 | 0.047 | 0.022 | 2.20 | 1.39 | -3.49 | 1.64 | 3.65E-02 | NUP35(dist=7247), MIR548AE1(dist=1210043)        | intergenic     |
| 9  | 80216585  | C | A | rs73462041              | 8.75E-01 | 0.032 | 0.033 | 0.96 | 0.6  | -1.53 | 6.33E-05 | 0.045 | 0.022 | 2.07 | 1.3  | -3.31 | 1.64 | 3.66E-02 | GNA14                                            | intronic       |
| 4  | 164802333 | A | G | rs56199172              | 5.40E-01 | 0.021 | 0.027 | 0.80 | 0.46 | -1.39 | 6.16E-05 | 0.050 | 0.021 | 2.49 | 1.59 | -3.9  | 1.57 | 3.66E-02 | MARCH1                                           | intronic       |
| 13 | 106398016 | C | T | rs74529250              | 8.41E-01 | 0.122 | 0.130 | 0.93 | 0.73 | -1.19 | 2.68E-05 | 0.140 | 0.092 | 1.60 | 1.22 | -2.1  | 1.30 | 3.70E-02 | LINC00343                                        | ncRNA_intronic |
| 12 | 11871496  | T | C | rs2724618               | 6.34E-05 | 0.310 | 0.228 | 1.52 | 1.27 | -1.82 | 1.75E-01 | 0.243 | 0.290 | 0.79 | 0.63 | -0.98 | 1.17 | 3.70E-02 | ETV6                                             | intronic       |
| 5  | 58141459  | A | G | rs2548233               | 5.03E-01 | 0.473 | 0.460 | 1.06 | 0.9  | -1.24 | 4.32E-05 | 0.386 | 0.463 | 0.73 | 0.6  | -0.88 | 0.85 | 3.72E-02 | RAB3C                                            | intronic       |
| 9  | 22415367  | C | T | rs116810914             | 5.06E-01 | 0.019 | 0.024 | 0.80 | 0.44 | -1.43 | 4.70E-05 | 0.054 | 0.026 | 2.18 | 1.42 | -3.35 | 1.59 | 3.72E-02 | CDKN2B-AS1(dist=294274), DMRTA1(dist=31473)      | intergenic     |
| 20 | 62270930  | C | A | rs909334                | 3.89E-05 | 0.107 | 0.063 | 1.79 | 1.36 | -2.37 | 2.17E-01 | 0.064 | 0.085 | 0.74 | 0.5  | -1.08 | 1.32 | 3.74E-02 | STMN3                                            | downstream     |
| 10 | 17514846  | T | C | rs114866472             | 6.08E-01 | 0.037 | 0.042 | 0.86 | 0.56 | -1.32 | 1.80E-05 | 0.063 | 0.029 | 2.22 | 1.49 | -3.31 | 1.46 | 3.76E-02 | ST8SIA6(dist=18592), HACD1(dist=117112)          | intergenic     |
| 15 | 83617358  | G | A | rs115977842             | 3.65E-01 | 0.069 | 0.080 | 0.85 | 0.62 | -1.17 | 3.92E-06 | 0.123 | 0.070 | 1.85 | 1.38 | -2.48 | 1.31 | 3.76E-02 | HOMER2                                           | intronic       |
| 13 | 80256123  | C | T | rs111578707             | 7.12E-01 | 0.036 | 0.041 | 0.87 | 0.57 | -1.34 | 3.32E-05 | 0.062 | 0.034 | 1.87 | 1.25 | -2.78 | 1.55 | 3.77E-02 | LINC01068(dist=110542), LINC01038(dist=122398)   | intergenic     |
| 4  | 154798068 | G | A | rs10028498              | 3.73E-01 | 0.092 | 0.108 | 0.83 | 0.63 | -1.1  | 2.93E-05 | 0.162 | 0.097 | 1.80 | 1.39 | -2.33 | 1.25 | 3.79E-02 | SFRP2(dist=87840), DCHS2(dist=357459)            | intergenic     |
| 7  | 52792779  | G | A | rs6944572               | 6.17E-01 | 0.420 | 0.436 | 0.94 | 0.79 | -1.1  | 4.89E-05 | 0.469 | 0.385 | 1.41 | 1.17 | -1.7  | 1.16 | 3.86E-02 | COBL(dist=1408264), POM121L12(dist=310570)       | intergenic     |
| 8  | 139196273 | G | T | rs75595591              | 8.44E-01 | 0.051 | 0.055 | 0.92 | 0.64 | -1.33 | 3.37E-05 | 0.083 | 0.047 | 1.82 | 1.29 | -2.58 | 1.39 | 3.86E-02 | FAM135B                                          | intronic       |
| 13 | 71293311  | C | G | rs9572536               | 6.70E-01 | 0.060 | 0.064 | 0.94 | 0.67 | -1.33 | 5.66E-05 | 0.099 | 0.067 | 1.53 | 1.12 | -2.1  | 1.46 | 3.87E-02 | ATXN8OS(dist=579426), LINC00348(dist=295962)     | intergenic     |
| 17 | 39033017  | G | T | rs114253486             | 3.42E-01 | 0.029 | 0.039 | 0.74 | 0.46 | -1.19 | 1.04E-05 | 0.070 | 0.034 | 2.17 | 1.49 | -3.17 | 1.47 | 3.88E-02 | KRT20                                            | intronic       |
| 16 | 84664053  | G | A | rs141573200             | 6.23E-01 | 0.048 | 0.054 | 0.89 | 0.61 | -1.3  | 4.84E-06 | 0.068 | 0.038 | 1.86 | 1.27 | -2.72 | 1.51 | 3.92E-02 | COTL1(dist=12351), KLHL36(dist=18064)            | intergenic     |
| 3  | 114203698 | G | A | rs185133665             | 4.33E-01 | 0.031 | 0.036 | 0.84 | 0.53 | -1.34 | 4.30E-07 | 0.052 | 0.025 | 2.18 | 1.41 | -3.38 | 1.66 | 3.92E-02 | LOC101929754                                     | ncRNA_intronic |
| 16 | 80527354  | C | T | rs74029688              | 6.43E-01 | 0.023 | 0.027 | 0.86 | 0.5  | -1.47 | 6.41E-05 | 0.046 | 0.023 | 2.07 | 1.31 | -3.29 | 1.66 | 3.93E-02 | LOC102724084                                     | ncRNA_intronic |
| 7  | 22032649  | T | A | rs954717                | 5.79E-01 | 0.454 | 0.461 | 0.98 | 0.83 | -1.15 | 3.22E-05 | 0.527 | 0.443 | 1.40 | 1.16 | -1.69 | 1.15 | 3.94E-02 | CDCA7L(dist=47107), RAPGEF5(dist=125259)         | intergenic     |
| 5  | 75952023  | G | T | rs192399236;rs374730529 | 6.60E-01 | 0.029 | 0.035 | 0.85 | 0.53 | -1.36 | 1.27E-05 | 0.056 | 0.029 | 2.00 | 1.32 | -3.04 | 1.55 | 3.98E-02 | IQGAP2                                           | intronic       |
| 6  | 37604335  | C | A | rs7808023               | 3.78E-01 | 0.395 | 0.416 | 0.92 | 0.78 | -1.08 | 2.01E-05 | 0.504 | 0.404 | 1.50 | 1.24 | -1.81 | 1.15 | 4.03E-02 | MDGA1(NM_153487:c.*809G>T)                       | UTR3           |
| 9  | 137960713 | G | A | rs115958038             | 9.37E-01 | 0.031 | 0.033 | 0.95 | 0.6  | -1.51 | 4.91E-06 | 0.047 | 0.023 | 2.05 | 1.3  | -3.24 | 1.58 | 4.06E-02 | FCN1(dist=150907), OLFM1(dist=6376)              | intergenic     |
| 1  | 53837019  | A | T | rs115366171             | 5.56E-01 | 0.030 | 0.035 | 0.85 | 0.53 | -1.37 | 5.37E-05 | 0.058 | 0.031 | 1.95 | 1.29 | -2.94 | 1.58 | 4.14E-02 | LRP8(dist=43198), SLC25A3P1(dist=67024)          | intergenic     |
| 15 | 101952917 | T | A | rs200042293;rs74248303  | 7.42E-01 | 0.156 | 0.162 | 0.96 | 0.76 | -1.2  | 2.76E-05 | 0.196 | 0.150 | 1.38 | 1.09 | -1.76 | 1.26 | 4.15E-02 | PCSK6                                            | intronic       |
| 20 | 62303622  | T | G | rs6011018               | 7.56E-06 | 0.099 | 0.051 | 0.49 | 0.36 | -0.65 | 9.81E-02 | 0.060 | 0.086 | 1.48 | 1    | -2.18 | 0.77 | 4.17E-02 | RTEL1-TNFRSF6B                                   | ncRNA_intronic |
| 4  | 154655006 | T | C | rs78024257              | 4.47E-01 | 0.051 | 0.059 | 0.85 | 0.59 | -1.23 | 4.75E-05 | 0.093 | 0.055 | 1.76 | 1.27 | -2.45 | 1.42 | 4.19E-02 | RNF175                                           | intronic       |
| 3  | 27807033  | G | T | rs145915947             | 5.77E-01 | 0.032 | 0.036 | 0.90 | 0.57 | -1.42 | 5.70E-06 | 0.050 | 0.024 | 2.16 | 1.39 | -3.37 | 1.57 | 4.20E-02 | EOMES(dist=42827), CMC1(dist=476091)             | intergenic     |
| 20 | 62304299  | T | G | rs4809321               | 6.63E-06 | 0.099 | 0.050 | 0.48 | 0.36 | -0.65 | 9.10E-02 | 0.056 | 0.083 | 1.52 | 1.01 | -2.27 | 0.77 | 4.20E-02 | RTEL1-TNFRSF6B                                   | ncRNA_intronic |
| 4  | 92136545  | T | C | rs4414919               | 2.55E-01 | 0.380 | 0.398 | 0.93 | 0.79 | -1.1  | 1.17E-05 | 0.482 | 0.384 | 1.49 | 1.24 | -1.8  | 1.14 | 4.21E-02 | CCSER1                                           | intronic       |
| 2  | 2315529   | C | T | rs77353199              | 5.08E-05 | 0.061 | 0.032 | 1.96 | 1.36 | -2.82 | 7.25E-02 | 0.027 | 0.039 | 0.68 | 0.38 | -1.2  | 1.45 | 4.24E-02 | MYT1L                                            | intronic       |
| 20 | 62282439  | G | A | rs4809320               | 9.88E-06 | 0.112 | 0.064 | 0.54 | 0.41 | -0.71 | 1.02E-01 | 0.065 | 0.090 | 1.43 | 0.98 | -2.08 | 0.77 | 4.25E-02 | STMN3                                            | intronic       |
| 5  | 75951979  | C | T | rs144338768             | 6.76E-01 | 0.029 | 0.034 | 0.85 | 0.53 | -1.37 | 2.27E-05 | 0.055 | 0.029 | 2.00 | 1.31 | -3.04 | 1.54 | 4.27E-02 | IQGAP2                                           | intronic       |
| 4  | 185388487 | A | C | rs3775582               | 3.54E-01 | 0.171 | 0.190 | 0.88 | 0.71 | -1.09 | 6.04E-06 | 0.235 | 0.162 | 1.58 | 1.27 | -1.98 | 1.20 | 4.31E-02 | IRF2                                             | intronic       |
| 8  | 16371209  | C | A | rs73544219              | 8.60E-01 | 0.046 | 0.048 | 0.96 | 0.65 | -1.41 | 3.51E-05 | 0.063 | 0.031 | 2.09 | 1.41 | -3.11 | 1.42 | 4.31E-02 | MSR1(dist=320909), FGF20(dist=479125)            | intergenic     |
| 1  |           |   |   |                         |          |       |       |      |      |       |          |       |       |      |      |       |      |          |                                                  |                |

|    |           |   |   |                       |          |       |       |      |      |       |          |       |       |      |      |       |      |          |                                                |                |
|----|-----------|---|---|-----------------------|----------|-------|-------|------|------|-------|----------|-------|-------|------|------|-------|------|----------|------------------------------------------------|----------------|
| 20 | 62306410  | A | G | rs3787100             | 8.24E-06 | 0.098 | 0.051 | 0.49 | 0.37 | -0.66 | 1.00E-01 | 0.058 | 0.084 | 1.49 | 1    | -2.22 | 0.77 | 4.65E-02 | RTEL1-TNFRSF6B                                 | ncRNA_intronic |
| 10 | 17515427  | T | A | rs116584043           | 5.90E-01 | 0.037 | 0.043 | 0.86 | 0.56 | -1.31 | 3.53E-05 | 0.065 | 0.031 | 2.14 | 1.45 | -3.18 | 1.43 | 4.66E-02 | STBSIA6(dist=19173), HACD1(dist=116531)        | intergenic     |
| 4  | 185392400 | G | A | rs7681613             | 4.51E-01 | 0.171 | 0.189 | 0.89 | 0.72 | -1.1  | 5.53E-05 | 0.242 | 0.170 | 1.57 | 1.26 | -1.95 | 1.18 | 4.70E-02 | IRF2                                           | intronic       |
| 8  | 87271776  | T | C | rs4484676             | 2.72E-05 | 0.317 | 0.232 | 1.54 | 1.29 | -1.84 | 4.52E-02 | 0.220 | 0.272 | 0.76 | 0.61 | -0.95 | 1.16 | 4.70E-02 | SLC7A13(dist=29172), WWP1(dist=83218)          | intergenic     |
| 15 | 81449585  | A | G | rs145767028           | 4.88E-01 | 0.056 | 0.065 | 0.86 | 0.61 | -1.22 | 2.23E-05 | 0.093 | 0.055 | 1.77 | 1.28 | -2.46 | 1.37 | 4.72E-02 | C15orf26(dist=8069), IL16(dist=39634)          | intergenic     |
| 12 | 78031005  | T | C | rs11106072            | 3.42E-01 | 0.169 | 0.180 | 0.92 | 0.74 | -1.15 | 5.13E-05 | 0.259 | 0.193 | 1.47 | 1.18 | -1.82 | 1.19 | 4.74E-02 | E2F7(dist=571645), NAV3(dist=194064)           | intergenic     |
| 14 | 63521760  | C | T | rs144054281           | 4.16E-01 | 0.041 | 0.049 | 0.82 | 0.55 | -1.23 | 5.82E-05 | 0.083 | 0.042 | 2.08 | 1.47 | -2.95 | 1.37 | 4.74E-02 | KCNH5(dist=9804), RHOJ(dist=149342)            | intergenic     |
| 16 | 84664342  | G | A | rs77843743            | 5.17E-01 | 0.045 | 0.051 | 0.87 | 0.59 | -1.28 | 3.31E-06 | 0.068 | 0.037 | 1.88 | 1.28 | -2.75 | 1.50 | 4.74E-02 | COTL1(dist=12640), KLHL36(dist=17775)          | intergenic     |
| 18 | 59247774  | C | T | rs896643              | 5.29E-05 | 0.094 | 0.055 | 0.56 | 0.42 | -0.75 | 1.37E-01 | 0.057 | 0.073 | 1.31 | 0.88 | -1.96 | 0.76 | 4.74E-02 | CDH20(dist=25409), LINC01544(dist=167635)      | intergenic     |
| 17 | 71924339  | T | C | rs78448173            | 7.89E-01 | 0.028 | 0.030 | 0.91 | 0.56 | -1.49 | 5.65E-05 | 0.048 | 0.023 | 2.18 | 1.38 | -3.43 | 1.52 | 4.75E-02 | LINC00469(dist=99663), RPL38(dist=275456)      | intergenic     |
| 17 | 71920803  | G | A | rs77319145            | 8.06E-01 | 0.028 | 0.030 | 0.91 | 0.56 | -1.5  | 5.97E-05 | 0.048 | 0.023 | 2.16 | 1.37 | -3.41 | 1.52 | 4.76E-02 | LINC00469(dist=96127), RPL38(dist=278992)      | intergenic     |
| 17 | 71920256  | T | C | rs77767261            | 8.09E-01 | 0.028 | 0.030 | 0.92 | 0.56 | -1.5  | 6.09E-05 | 0.048 | 0.023 | 2.16 | 1.37 | -3.4  | 1.52 | 4.76E-02 | LINC00469(dist=95580), RPL38(dist=279539)      | intergenic     |
| 2  | 212864405 | T | C | rs16847462            | 4.34E-01 | 0.213 | 0.228 | 0.92 | 0.75 | -1.12 | 3.24E-05 | 0.285 | 0.205 | 1.55 | 1.26 | -1.91 | 1.17 | 4.76E-02 | ERBB4                                          | intronic       |
| 17 | 71919552  | T | C | rs74368176            | 8.11E-01 | 0.028 | 0.030 | 0.92 | 0.56 | -1.5  | 6.14E-05 | 0.047 | 0.023 | 2.16 | 1.37 | -3.4  | 1.52 | 4.76E-02 | LINC00469(dist=94876), RPL38(dist=280243)      | intergenic     |
| 15 | 82456227  | T | C | rs1128431             | 2.00E-01 | 0.295 | 0.327 | 0.86 | 0.72 | -1.03 | 4.00E-06 | 0.387 | 0.283 | 1.60 | 1.32 | -1.94 | 1.15 | 4.77E-02 | EFTUD1                                         | exonic         |
| 14 | 63525348  | T | G | rs149136792           | 4.14E-01 | 0.041 | 0.049 | 0.82 | 0.55 | -1.23 | 5.83E-05 | 0.083 | 0.042 | 2.08 | 1.47 | -2.95 | 1.37 | 4.77E-02 | KCNH5(dist=13392), RHOJ(dist=145754)           | intergenic     |
| 17 | 71919425  | T | C | rs77161547            | 8.12E-01 | 0.028 | 0.030 | 0.92 | 0.56 | -1.5  | 6.19E-05 | 0.047 | 0.023 | 2.15 | 1.37 | -3.4  | 1.52 | 4.77E-02 | LINC00469(dist=94749), RPL38(dist=280370)      | intergenic     |
| 17 | 71919442  | T | C | rs75083833            | 8.12E-01 | 0.028 | 0.030 | 0.92 | 0.56 | -1.5  | 6.19E-05 | 0.047 | 0.023 | 2.15 | 1.37 | -3.4  | 1.52 | 4.77E-02 | LINC00469(dist=94766), RPL38(dist=280353)      | intergenic     |
| 10 | 17516607  | C | T | rs113844030           | 5.78E-01 | 0.037 | 0.043 | 0.85 | 0.56 | -1.31 | 3.17E-05 | 0.064 | 0.031 | 2.15 | 1.45 | -3.19 | 1.43 | 4.78E-02 | STBSIA6(dist=20353), HACD1(dist=115351)        | intergenic     |
| 14 | 63527015  | G | T | rs145421435           | 4.13E-01 | 0.041 | 0.049 | 0.82 | 0.54 | -1.23 | 5.83E-05 | 0.083 | 0.042 | 2.08 | 1.47 | -2.95 | 1.37 | 4.79E-02 | KCNH5(dist=15059), RHOJ(dist=144087)           | intergenic     |
| 20 | 62310810  | T | C | rs6062301             | 2.54E-05 | 0.097 | 0.051 | 0.51 | 0.38 | -0.68 | 1.43E-01 | 0.059 | 0.083 | 1.44 | 0.97 | -2.13 | 0.77 | 4.80E-02 | RTEL1-TNFRSF6B                                 | ncRNA_intronic |
| 3  | 88982187  | A | G | rs12714725            | 2.75E-01 | 0.047 | 0.051 | 1.09 | 0.74 | -1.6  | 1.44E-05 | 0.096 | 0.062 | 0.63 | 0.45 | -0.87 | 0.73 | 4.80E-02 | C3orf38(dist=775072), EPHA3(dist=174487)       | intergenic     |
| 17 | 71918506  | A | G | rs116308099           | 8.14E-01 | 0.028 | 0.030 | 0.92 | 0.56 | -1.5  | 6.39E-05 | 0.047 | 0.023 | 2.15 | 1.36 | -3.39 | 1.52 | 4.81E-02 | LINC00469(dist=93830), RPL38(dist=281289)      | intergenic     |
| 19 | 43624607  | C | T | rs386809536;rs2354286 | 5.06E-05 | 0.124 | 0.077 | 0.59 | 0.45 | -0.76 | 2.11E-01 | 0.093 | 0.114 | 1.26 | 0.91 | -1.73 | 0.78 | 4.81E-02 | PSG2(dist=37714), PSG5(dist=47288)             | intergenic     |
| 20 | 62300811  | G | T | rs3848669             | 7.31E-06 | 0.098 | 0.050 | 0.48 | 0.36 | -0.65 | 8.09E-02 | 0.055 | 0.083 | 1.54 | 1.03 | -2.3  | 0.78 | 4.82E-02 | RTEL1-TNFRSF6B                                 | ncRNA_intronic |
| 3  | 194688387 | T | C | rs73075243            | 5.96E-01 | 0.025 | 0.029 | 0.84 | 0.5  | -1.41 | 4.99E-05 | 0.049 | 0.025 | 2.01 | 1.28 | -3.14 | 1.61 | 4.84E-02 | LOC100507391(dist=185490), XXYL1(dist=100626)  | intergenic     |
| 2  | 217439584 | G | T | rs116785944           | 4.71E-02 | 0.058 | 0.046 | 1.27 | 0.89 | -1.81 | 3.65E-05 | 0.065 | 0.038 | 1.75 | 1.19 | -2.57 | 1.65 | 4.84E-02 | LINC01280(dist=21923), IGFBP2(dist=4543)       | intergenic     |
| 16 | 81066885  | A | G | rs62054588            | 5.41E-01 | 0.039 | 0.043 | 0.90 | 0.59 | -1.37 | 4.57E-05 | 0.073 | 0.042 | 1.82 | 1.26 | -2.63 | 1.42 | 4.85E-02 | CENPN                                          | downstream     |
| 2  | 77909031  | T | C | rs116135915           | 2.83E-01 | 0.019 | 0.026 | 0.72 | 0.4  | -1.29 | 9.18E-06 | 0.058 | 0.025 | 2.38 | 1.57 | -3.61 | 1.51 | 4.86E-02 | LOC101927967                                   | ncRNA_intronic |
| 7  | 64542260  | C | G | rs115440814           | 9.77E-01 | 0.051 | 0.051 | 0.99 | 0.68 | -1.44 | 5.30E-05 | 0.063 | 0.038 | 1.70 | 1.15 | -2.52 | 1.46 | 4.91E-02 | CCT6P3(dist=7169), ZNF92(dist=296452)          | intergenic     |
| 13 | 58713821  | A | G | rs114787364           | 3.78E-01 | 0.018 | 0.026 | 0.70 | 0.39 | -1.26 | 2.97E-05 | 0.049 | 0.020 | 2.53 | 1.61 | -3.97 | 1.56 | 4.95E-02 | PCDH17(dist=410756), LOC101926897(dist=26140)  | intergenic     |
| 13 | 104806714 | A | T | rs9670144             | 9.37E-01 | 0.021 | 0.022 | 0.95 | 0.54 | -1.66 | 4.55E-05 | 0.036 | 0.021 | 1.79 | 1.07 | -2.99 | 1.80 | 4.96E-02 | LINC01309(dist=726679), DAOA-AS1(dist=1304692) | intergenic     |
| 2  | 58496636  | G | A | rs145270516           | 3.67E-05 | 0.069 | 0.035 | 2.06 | 1.46 | -2.92 | 2.21E-02 | 0.014 | 0.031 | 0.44 | 0.2  | -0.97 | 1.41 | 4.97E-02 | FANCL(dist=28121), LINC01122(dist=251252)      | intergenic     |
| 2  | 212863115 | A | G | rs7424635             | 4.15E-01 | 0.212 | 0.228 | 0.91 | 0.75 | -1.11 | 3.02E-05 | 0.285 | 0.205 | 1.55 | 1.26 | -1.91 | 1.17 | 5.00E-02 | ERBB4                                          | intronic       |
| 8  | 48583476  | T | G | rs7816091             | 5.96E-01 | 0.030 | 0.035 | 0.84 | 0.52 | -1.34 | 3.97E-06 | 0.052 | 0.023 | 2.31 | 1.49 | -3.58 | 1.50 | 5.01E-02 | SPIDR                                          | intronic       |
| 3  | 61642050  | C | T | rs150070786           | 6.49E-01 | 0.028 | 0.032 | 0.88 | 0.54 | -1.44 | 3.53E-05 | 0.050 | 0.026 | 1.94 | 1.24 | -3.02 | 1.58 | 5.01E-02 | PTPRG                                          | intronic       |
| 1  | 157607547 | C | A | rs386635844;rs2758687 | 4.17E-01 | 0.445 | 0.424 | 1.09 | 0.92 | -1.28 | 5.02E-05 | 0.341 | 0.432 | 0.68 | 0.56 | -0.83 | 0.88 | 5.02E-02 | FCRL4(dist=39677), FCRL3(dist=40431)           | intergenic     |
| 20 | 62294402  | A | T | rs6010998             | 7.05E-06 | 0.099 | 0.050 | 0.48 | 0.36 | -0.65 | 7.74E-02 | 0.055 | 0.083 | 1.54 | 1.03 | -2.31 | 0.78 | 5.04E-02 | RTEL1-TNFRSF6B                                 | ncRNA_intronic |
| 20 | 62312299  | T | C | rs2297440             | 3.41E-05 | 0.096 | 0.052 | 0.51 | 0.38 | -0.69 | 1.56E-01 | 0.060 | 0.083 | 1.43 | 0.96 | -2.11 | 0.78 | 5.04E-02 | RTEL1-TNFRSF6B                                 | ncRNA_intronic |
| 20 | 62312497  | A | G | rs4809323             | 3.39E-05 | 0.096 | 0.052 | 0.51 | 0.38 | -0.69 | 1.56E-01 | 0.060 | 0.083 | 1.43 | 0.97 | -2.11 | 0.78 | 5.04E-02 | RTEL1-TNFRSF6B                                 | ncRNA_intronic |
| 20 | 62293460  | T | C | rs2297433             | 6.95E-06 | 0.099 | 0.050 | 0.48 | 0.36 | -0.65 | 7.72E-02 | 0.055 | 0.083 | 1.54 | 1.03 | -2.31 | 0.78 | 5.05E-02 | RTEL1-TNFRSF6B                                 | ncRNA_intronic |
| 5  | 14680451  | C | T | rs25941               | 6.57E-01 | 0.025 | 0.027 | 0.92 | 0.55 | -1.54 | 1.01E-05 | 0.060 | 0.039 | 1.58 | 1.06 | -2.36 | 1.56 | 5.05E-02 | OTULIN                                         | intronic       |
| 6  | 107370864 | A | G | rs9480722             | 5.85E-01 | 0.194 | 0.209 | 1.10 | 0.89 | -1.35 | 3.13E-05 | 0.245 | 0.178 | 0.67 | 0.54 | -0.83 | 0.83 | 5.06E-02 | C6orf203                                       | intronic       |
| 8  | 48843926  | T | C | rs140789033           | 4.98E-01 | 0.030 | 0.037 | 0.80 | 0.5  | -1.27 | 3.26E-05 | 0.062 | 0.030 | 2.13 | 1.43 | -3.18 | 1.45 | 5.07E-02 | PRKDC                                          | intronic       |
| 16 | 6800542   | G | C | rs142467851           | 4.33E-01 | 0.028 | 0.034 | 0.82 | 0.51 | -1.33 | 5.42E-05 | 0.054 | 0.029 | 1.87 | 1.22 | -2.86 | 1.61 | 5.08E-02 | RBFOX1                                         | intronic       |
| 9  | 22426920  | T | C | rs140856068           | 3.84E-01 | 0.017 | 0.023 | 0.74 | 0.4  | -1.37 | 4.86E-05 | 0.053 | 0.025 | 2.21 | 1.43 | -3.4  | 1.55 | 5.09E-02 | CDKN2B-AS1(dist=305827), DMRTA1(dist=19920)    | intergenic     |
| 8  | 135554231 | C | T | rs57219802            | 6.31E-05 | 0.082 | 0.040 | 2.13 | 1.55 | -2.94 | 8.01E-02 | 0.038 | 0.063 | 0.59 | 0.37 | -0.96 | 1.33 | 5.11E-02 | ZFAT                                           | intronic       |
| 20 | 62312755  | G | A | rs7361098             | 3.48E-05 | 0.096 | 0.052 | 0.51 | 0.38 | -0.69 | 1.54E-01 | 0.060 | 0.083 | 1.43 | 0.97 | -2.11 | 0.78 | 5.14E-02 | RTEL1-TNFRSF6B                                 | ncRNA_intronic |
| 15 | 82444663  | T | C | rs2292071             | 2.09E-01 | 0.300 | 0.332 | 0.86 | 0.72 | -1.03 | 6.06E-06 | 0.391 | 0.287 | 1.59 | 1.31 | -1.93 | 1.14 | 5.17E-02 | EFTUD1                                         | exonic         |
| 2  | 58866943  | T | G | rs17190583            | 3.72E-01 | 0.030 | 0.033 | 0.91 | 0.56 | -1.46 | 3.03E-05 | 0.069 | 0.040 | 1.74 | 1.19 | -2.55 | 1.45 | 5.22E-02 | LINC01122                                      | ncRNA_intronic |
| 15 | 90919640  | C | T | rs74038640            | 4.33E-01 | 0.020 | 0.026 | 0.79 | 0.45 | -1.39 | 2.21E-05 | 0.049 | 0.029 | 2.25 | 1.43 | -3.53 | 1.59 | 5.23E-02 | ZNF774(dist=14925), IQGAP1(dist=11833)         | intergenic     |
| 3  | 186420456 | G | A | rs115216474           | 4.81E-01 | 0.034 | 0.038 | 0.88 | 0.56 | -1.37 | 5.66E-05 | 0.055 | 0.029 | 1.94 | 1.27 | -2.95 | 1.59 | 5.24E-02 | HRG(dist=24433), KNG1(dist=14642)              | intergenic     |
| 5  | 4191991   | G | T | rs73044052            | 9.03E-01 | 0.034 | 0.036 | 0.95 | 0.61 | -1.48 | 1.47E-05 | 0.045 | 0.026 | 1.72 | 1.08 | -2.73 | 1.59 | 5.27E-02 | IRX1(dist=590474), LOC101929153(dist=581603)   | intergenic     |
| 20 | 37020127  | A | T | rs60117239            | 4.96E-02 | 0.036 | 0.027 | 1.35 | 0.86 | -2.12 | 2.26E-06 | 0.035 | 0.021 | 1.67 | 1    | -2.81 | 1.97 | 5.28E-02 | LBP(dist=14474), SNHG17(dist=29112)            | intergenic     |
| 1  | 114451386 | G | A | rs12046289            | 7.18E-01 | 0.041 | 0.037 | 1.11 | 0.73 | -1.68 | 5.45E-05 | 0.082 | 0.056 | 1.50 | 1.06 | -2.12 | 1.43 | 5.28E-02 | DCLRE1B                                        | intronic       |
| 17 | 71925763  | A | T | rs78796761            | 7.42E-01 | 0.027 | 0.030 | 0.90 | 0.54 | -1.47 | 5.59E-05 | 0.047 | 0.022 | 2.23 | 1.41 | -3.53 | 1.51 | 5.31E-02 | LINC00469(dist=101087), RPL38(dist=274032)     | intergenic     |
| 17 | 71924944  | A | T | rs74576540            | 7.46E-01 | 0.027 | 0.0   |      |      |       |          |       |       |      |      |       |      |          |                                                |                |

|    |           |   |   |                                   |          |       |       |      |      |       |          |       |       |      |      |       |      |          |                                                |                |
|----|-----------|---|---|-----------------------------------|----------|-------|-------|------|------|-------|----------|-------|-------|------|------|-------|------|----------|------------------------------------------------|----------------|
| 15 | 82485778  | C | T | rs8040160                         | 3.50E-01 | 0.306 | 0.331 | 0.89 | 0.74 | -1.06 | 5.88E-05 | 0.394 | 0.303 | 1.50 | 1.23 | -1.81 | 1.15 | 5.59E-02 | EFTUD1                                         | intronic       |
| 15 | 82475130  | T | C | rs28529095                        | 1.52E-01 | 0.291 | 0.326 | 0.85 | 0.71 | -1.02 | 2.89E-06 | 0.390 | 0.284 | 1.61 | 1.32 | -1.95 | 1.14 | 5.62E-02 | EFTUD1                                         | intronic       |
| 2  | 78001111  | A | C | rs145109768                       | 3.78E-01 | 0.054 | 0.064 | 0.84 | 0.59 | -1.19 | 2.09E-05 | 0.096 | 0.049 | 2.06 | 1.49 | -2.86 | 1.30 | 5.65E-02 | LOC101927967                                   | ncRNA_intronic |
| 3  | 73468649  | G | A | rs147520552                       | 4.08E-01 | 0.042 | 0.051 | 0.82 | 0.55 | -1.23 | 7.78E-06 | 0.068 | 0.033 | 2.15 | 1.47 | -3.16 | 1.43 | 5.66E-02 | PDZRN3                                         | intronic       |
| 2  | 78003210  | C | T | rs74987019                        | 3.70E-01 | 0.054 | 0.064 | 0.84 | 0.59 | -1.19 | 1.88E-05 | 0.096 | 0.049 | 2.06 | 1.49 | -2.86 | 1.30 | 5.66E-02 | LOC101927967                                   | ncRNA_intronic |
| 5  | 75937603  | G | T | rs114677303                       | 5.17E-01 | 0.027 | 0.033 | 0.80 | 0.48 | -1.3  | 1.05E-05 | 0.055 | 0.028 | 2.02 | 1.33 | -3.09 | 1.50 | 5.67E-02 | IQGAP2                                         | intronic       |
| 2  | 78057285  | A | G | rs76786067                        | 1.24E-01 | 0.015 | 0.024 | 0.63 | 0.33 | -1.2  | 1.13E-05 | 0.057 | 0.024 | 2.47 | 1.62 | -3.76 | 1.53 | 5.68E-02 | LOC101927967                                   | ncRNA_intronic |
| 4  | 134114628 | C | A | rs76968169                        | 6.10E-01 | 0.092 | 0.101 | 0.90 | 0.68 | -1.19 | 5.48E-05 | 0.129 | 0.082 | 1.64 | 1.24 | -2.18 | 1.28 | 5.74E-02 | PCDH10(NM_032961:c.*3313C>A)                   | UTR3           |
| 15 | 82447326  | T | C | rs61203524                        | 3.94E-01 | 0.358 | 0.385 | 0.89 | 0.75 | -1.05 | 6.07E-05 | 0.429 | 0.333 | 1.50 | 1.24 | -1.82 | 1.14 | 5.75E-02 | EFTUD1                                         | intronic       |
| 13 | 27446491  | C | A | rs78867551                        | 3.52E-01 | 0.023 | 0.025 | 0.91 | 0.53 | -1.56 | 5.85E-05 | 0.057 | 0.035 | 1.66 | 1.1  | -2.5  | 1.67 | 5.79E-02 | GPR12(dist=111569), USP12(dist=193796)         | intergenic     |
| 18 | 68559227  | G | A | rs116481923                       | 2.01E-01 | 0.021 | 0.032 | 0.65 | 0.37 | -1.13 | 3.30E-06 | 0.060 | 0.026 | 2.42 | 1.6  | -3.64 | 1.47 | 5.82E-02 | GTSCR1(dist=241134), LINC01541(dist=627973)    | intergenic     |
| 4  | 185393621 | C | G | rs67252769                        | 3.90E-01 | 0.168 | 0.187 | 0.88 | 0.71 | -1.09 | 5.41E-05 | 0.240 | 0.168 | 1.57 | 1.25 | -1.95 | 1.17 | 5.84E-02 | IRF2                                           | intronic       |
| 5  | 2937355   | C | T | rs116496889                       | 6.78E-01 | 0.029 | 0.033 | 0.89 | 0.55 | -1.43 | 2.85E-05 | 0.047 | 0.022 | 2.16 | 1.36 | -3.42 | 1.51 | 5.87E-02 | C5orf38(dist=181844), LINC01377(dist=240594)   | intergenic     |
| 4  | 114306010 | T | G | rs115471813                       | 6.54E-01 | 0.026 | 0.030 | 0.85 | 0.51 | -1.41 | 4.74E-05 | 0.044 | 0.020 | 2.24 | 1.39 | -3.59 | 1.55 | 5.88E-02 | ANK2(dist=1114), CAMK2D(dist=66178)            | intergenic     |
| 18 | 68663734  | A | T | rs17083275                        | 2.62E-01 | 0.025 | 0.035 | 0.70 | 0.42 | -1.17 | 3.63E-06 | 0.060 | 0.026 | 2.40 | 1.59 | -3.62 | 1.45 | 5.95E-02 | GTSCR1(dist=245641), LINC01541(dist=623466)    | intergenic     |
| 5  | 75950540  | G | A | rs113700636                       | 5.52E-01 | 0.027 | 0.034 | 0.81 | 0.5  | -1.33 | 2.35E-05 | 0.056 | 0.029 | 2.00 | 1.31 | -3.04 | 1.49 | 5.96E-02 | IQGAP2                                         | intronic       |
| 4  | 92142940  | A | G | rs13146287                        | 2.07E-01 | 0.383 | 0.404 | 0.92 | 0.78 | -1.08 | 9.91E-06 | 0.495 | 0.399 | 1.47 | 1.22 | -1.77 | 1.13 | 6.03E-02 | CCSER1                                         | intronic       |
| 20 | 62318856  | G | C | rs6062490                         | 5.21E-05 | 0.104 | 0.059 | 0.55 | 0.41 | -0.72 | 1.47E-01 | 0.063 | 0.087 | 1.42 | 0.97 | -2.08 | 0.79 | 6.04E-02 | RTEL1-TNFRSF6B                                 | ncRNA_intronic |
| 6  | 29446855  | C | T | rs11963957                        | 3.55E-01 | 0.110 | 0.126 | 0.85 | 0.66 | -1.1  | 6.21E-05 | 0.177 | 0.111 | 1.73 | 1.35 | -2.22 | 1.22 | 6.06E-02 | OR2H1(dist=14756), MAS1L(dist=7688)            | intergenic     |
| 7  | 53570901  | A | G | rs185976796                       | 3.03E-01 | 0.020 | 0.024 | 0.80 | 0.45 | -1.42 | 2.71E-06 | 0.045 | 0.021 | 2.19 | 1.37 | -3.49 | 1.66 | 6.08E-02 | POM121L12(dist=466283), LINC01446(dist=152301) | intergenic     |
| 10 | 17520672  | A | C | rs78632294                        | 5.15E-01 | 0.046 | 0.053 | 0.87 | 0.59 | -1.27 | 3.77E-05 | 0.077 | 0.042 | 1.93 | 1.34 | -2.76 | 1.37 | 6.14E-02 | ST8SIA6(dist=24418), HADC11(dist=111286)       | intergenic     |
| 4  | 114305491 | A | G | rs79514577                        | 6.51E-01 | 0.026 | 0.030 | 0.85 | 0.51 | -1.41 | 5.51E-05 | 0.044 | 0.020 | 2.24 | 1.4  | -3.6  | 1.54 | 6.15E-02 | ANK2                                           | downstream     |
| 15 | 83338732  | G | A | rs67205493                        | 3.04E-01 | 0.190 | 0.211 | 0.88 | 0.72 | -1.08 | 2.87E-05 | 0.272 | 0.195 | 1.54 | 1.25 | -1.91 | 1.17 | 6.16E-02 | CPEB1-AS1                                      | ncRNA_intronic |
| 2  | 78001451  | T | A | rs113623128                       | 3.49E-01 | 0.056 | 0.066 | 0.83 | 0.59 | -1.18 | 1.97E-05 | 0.098 | 0.051 | 2.03 | 1.47 | -2.81 | 1.30 | 6.16E-02 | LOC101927967                                   | ncRNA_intronic |
| 1  | 169498835 | G | A | rs386636637;rs6008                | 4.46E-05 | 0.153 | 0.107 | 1.50 | 1.19 | -1.9  | 1.75E-01 | 0.111 | 0.130 | 0.84 | 0.62 | -1.13 | 1.22 | 6.17E-02 | F5                                             | intronic       |
| 4  | 154867947 | A | G | rs11935708                        | 3.10E-01 | 0.256 | 0.284 | 0.87 | 0.72 | -1.04 | 2.18E-05 | 0.325 | 0.231 | 1.60 | 1.31 | -1.96 | 1.15 | 6.26E-02 | SFRP2(dist=157719), DCHS2(dist=287580)         | intergenic     |
| 20 | 62309839  | A | G | rs6010620                         | 3.60E-05 | 0.101 | 0.056 | 0.52 | 0.39 | -0.7  | 1.30E-01 | 0.064 | 0.089 | 1.44 | 0.98 | -2.1  | 0.79 | 6.33E-02 | RTEL1-TNFRSF6B                                 | ncRNA_intronic |
| 9  | 5698998   | A | C | rs79554565                        | 4.44E-01 | 0.035 | 0.041 | 0.84 | 0.54 | -1.31 | 5.05E-05 | 0.069 | 0.038 | 1.89 | 1.29 | -2.76 | 1.44 | 6.36E-02 | RIC1                                           | intronic       |
| 20 | 62275875  | T | C | rs200137512;rs4083754;rs112923996 | 1.84E-05 | 0.103 | 0.057 | 0.53 | 0.4  | -0.7  | 9.11E-02 | 0.059 | 0.085 | 1.49 | 1    | -2.2  | 0.79 | 6.37E-02 | STMN3                                          | intronic       |
| 20 | 62319464  | T | C | rs2738785                         | 5.83E-05 | 0.101 | 0.056 | 0.53 | 0.4  | -0.71 | 1.45E-01 | 0.062 | 0.086 | 1.43 | 0.97 | -2.1  | 0.79 | 6.37E-02 | RTEL1-TNFRSF6B                                 | ncRNA_intronic |
| 17 | 71926939  | C | T | rs75444092                        | 6.63E-01 | 0.026 | 0.030 | 0.87 | 0.53 | -1.45 | 5.48E-05 | 0.048 | 0.022 | 2.17 | 1.38 | -3.43 | 1.48 | 6.45E-02 | LINC00469(dist=102263), RPL38(dist=272856)     | intergenic     |
| 14 | 91761769  | C | T | rs74086366                        | 3.17E-01 | 0.032 | 0.039 | 0.82 | 0.52 | -1.29 | 1.14E-05 | 0.062 | 0.029 | 2.19 | 1.47 | -3.28 | 1.42 | 6.56E-02 | CCDC88C                                        | intronic       |
| 13 | 41032766  | G | A | rs138473497                       | 6.37E-02 | 0.119 | 0.031 | 0.61 | 0.35 | -1.09 | 2.81E-05 | 0.038 | 0.021 | 1.87 | 1.13 | -3.09 | 0.57 | 6.58E-02 | LINC00598                                      | ncRNA_exonic   |
| 13 | 58688272  | C | G | rs78106490                        | 3.83E-01 | 0.023 | 0.032 | 0.72 | 0.42 | -1.21 | 3.91E-05 | 0.052 | 0.022 | 2.47 | 1.59 | -3.84 | 1.47 | 6.61E-02 | PCDH17(dist=385207), LOC101926897(dist=51689)  | intergenic     |
| 15 | 82489385  | A | T | rs57014042                        | 1.54E-01 | 0.295 | 0.329 | 0.85 | 0.72 | -1.02 | 4.62E-06 | 0.385 | 0.285 | 1.57 | 1.29 | -1.9  | 1.14 | 6.61E-02 | EFTUD1                                         | intronic       |
| 2  | 173379340 | A | C | rs71407946;rs13018866             | 5.59E-01 | 0.025 | 0.026 | 0.97 | 0.58 | -1.63 | 8.18E-06 | 0.053 | 0.034 | 1.58 | 1.03 | -2.43 | 1.58 | 6.63E-02 | ITGA6(dist=8159), PDK1(dist=41357)             | intergenic     |
| 20 | 62288752  | T | C | rs3761124                         | 1.06E-05 | 0.098 | 0.052 | 0.50 | 0.37 | -0.67 | 7.72E-02 | 0.056 | 0.083 | 1.54 | 1.03 | -2.3  | 0.79 | 6.72E-02 | RTEL1, RTEL1-TNFRSF6B                          | upstream       |
| 20 | 62322288  | T | C | rs3208007                         | 5.45E-05 | 0.101 | 0.056 | 0.54 | 0.4  | -0.71 | 1.34E-01 | 0.062 | 0.086 | 1.44 | 0.98 | -2.11 | 0.79 | 6.73E-02 | RTEL1                                          | exonic         |
| 6  | 7468737   | C | T | rs77924821                        | 4.56E-01 | 0.030 | 0.031 | 0.96 | 0.6  | -1.55 | 6.28E-05 | 0.051 | 0.029 | 1.80 | 1.16 | -2.78 | 1.55 | 6.74E-02 | RIOK1(dist=50467), DSP(dist=73133)             | intergenic     |
| 4  | 112421927 | T | C | rs79435779                        | 1.53E-05 | 0.048 | 0.027 | 1.83 | 1.22 | -2.75 | 1.59E-01 | 0.026 | 0.036 | 0.73 | 0.41 | -1.3  | 1.49 | 6.79E-02 | PITX2(dist=858648), C4orf32(dist=644626)       | intergenic     |
| 15 | 82691159  | T | C | rs141623628                       | 3.33E-01 | 0.362 | 0.386 | 0.90 | 0.76 | -1.07 | 6.15E-05 | 0.435 | 0.358 | 1.38 | 1.14 | -1.67 | 1.16 | 6.80E-02 | UBE2Q2P2                                       | ncRNA_intronic |
| 17 | 71927941  | C | G | rs76003087                        | 6.54E-01 | 0.026 | 0.030 | 0.87 | 0.52 | -1.44 | 6.30E-05 | 0.046 | 0.021 | 2.26 | 1.42 | -3.59 | 1.47 | 6.82E-02 | LINC00469(dist=103265), RPL38(dist=271854)     | intergenic     |
| 14 | 31657344  | T | C | rs71112385;rs113975390            | 3.85E-01 | 0.043 | 0.051 | 0.84 | 0.56 | -1.24 | 9.24E-06 | 0.074 | 0.044 | 1.75 | 1.21 | -2.52 | 1.44 | 6.85E-02 | HECTD1                                         | intronic       |
| 3  | 13848077  | C | G | rs75001335                        | 6.43E-01 | 0.040 | 0.045 | 0.88 | 0.59 | -1.33 | 6.45E-05 | 0.054 | 0.030 | 1.88 | 1.23 | -2.87 | 1.48 | 6.86E-02 | LINC00620(dist=59945), WNT7A(dist=12005)       | intergenic     |
| 8  | 87287663  | C | T | rs6999654                         | 5.01E-05 | 0.309 | 0.226 | 1.53 | 1.28 | -1.83 | 3.89E-02 | 0.217 | 0.270 | 0.75 | 0.6  | -0.94 | 1.15 | 6.90E-02 | SLC7A13(dist=45059), WWP1(dist=673331)         | intergenic     |
| 2  | 233081802 | T | C | rs3116212                         | 3.70E-05 | 0.468 | 0.403 | 1.31 | 1.11 | -1.54 | 4.48E-02 | 0.351 | 0.384 | 0.87 | 0.71 | -1.05 | 1.14 | 6.97E-02 | DIS3L2                                         | intronic       |
| 2  | 58504936  | A | G | rs114973124                       | 6.42E-05 | 0.071 | 0.037 | 2.00 | 1.42 | -2.81 | 1.93E-02 | 0.013 | 0.031 | 0.42 | 0.19 | -0.94 | 1.36 | 7.02E-02 | FANCL(dist=36421), LINC01122(dist=242952)      | intergenic     |
| 4  | 154787820 | G | C | rs115620227                       | 2.55E-01 | 0.014 | 0.021 | 0.66 | 0.34 | -1.29 | 3.74E-05 | 0.045 | 0.022 | 2.11 | 1.32 | -3.37 | 1.64 | 7.03E-02 | SFRP2(dist=77592), DCHS2(dist=367707)          | intergenic     |
| 14 | 91734818  | T | C | rs74086352                        | 3.18E-01 | 0.031 | 0.040 | 0.79 | 0.5  | -1.24 | 6.32E-06 | 0.062 | 0.028 | 2.26 | 1.51 | -3.39 | 1.41 | 7.03E-02 | GPR68(dist=14594), CCDC88C(dist=2849)          | intergenic     |
| 20 | 62308364  | C | A | rs6089956                         | 6.45E-05 | 0.049 | 0.030 | 1.68 | 1.13 | -2.51 | 7.15E-02 | 0.035 | 0.052 | 0.66 | 0.4  | -1.09 | 0.59 | 7.03E-02 | RTEL1-TNFRSF6B                                 | ncRNA_intronic |
| 1  | 155003954 | A | T | rs11582128                        | 3.93E-01 | 0.046 | 0.046 | 0.99 | 0.67 | -1.46 | 9.85E-06 | 0.087 | 0.060 | 1.49 | 1.06 | -2.08 | 1.41 | 7.07E-02 | DCST2                                          | intronic       |
| 5  | 125859493 | C | T | rs77089093                        | 3.40E-01 | 0.066 | 0.072 | 0.92 | 0.66 | -1.27 | 4.34E-05 | 0.103 | 0.069 | 1.54 | 1.13 | -2.11 | 1.34 | 7.07E-02 | GRAMD3(dist=29640), ALDH7A1(dist=18040)        | intergenic     |
| 16 | 77434305  | C | T | rs8047924                         | 6.08E-01 | 0.029 | 0.033 | 0.89 | 0.55 | -1.43 | 1.18E-05 | 0.045 | 0.021 | 2.23 | 1.4  | -3.57 | 1.48 | 7.11E-02 | ADAMTS18                                       | intronic       |
| 2  | 78004599  | G | A | rs141434807                       | 3.68E-01 | 0.052 | 0.061 | 0.84 | 0.58 | -1.21 | 5.95E-05 | 0.093 | 0.049 | 1.97 | 1.42 | -2.75 | 1.30 | 7.12E-02 | LOC101927967                                   | ncRNA_intronic |
| 20 | 62322699  | A | G | rs6011033                         | 4.10E-05 | 0.102 | 0.057 | 0.54 | 0.4  | -0.72 | 1.13E-01 | 0.061 | 0.087 | 1.46 | 0.99 | -2.14 | 0.79 | 7.14E-02 | RTEL1-TNFRSF6B                                 | ncRNA_intronic |
| 2  | 134461021 | A | G | rs4305321                         | 3.48E-01 | 0.117 | 0.127 | 1.09 | 0.85 | -1.41 | 5.83E-05 | 0.208 | 0.151 | 0.68 | 0.54 | -0.86 | 0.84 | 7.14E-02 | NCKAP5(dist=134990), MIR3679(dist=423675)      | intergenic     |
| 14 | 91764649  | C | T | rs77794369                        | 3.65E-01 | 0.032 | 0.039 | 0.82 | 0.52 | -1.29 | 1.25E-05 | 0.062 | 0.029 | 2.18 | 1.46 | -3.26 | 1.41 | 7.15E-02 | CCDC88C                                        | intronic       |



|    |           |   |   |             |          |       |       |      |      |       |            |       |       |      |      |       |      |          |                                                  |                |
|----|-----------|---|---|-------------|----------|-------|-------|------|------|-------|------------|-------|-------|------|------|-------|------|----------|--------------------------------------------------|----------------|
| 19 | 6917675   | T | C | rs35275289  | 4.23E-05 | 0.179 | 0.127 | 1.49 | 1.2  | -1.86 | 7.59E-02   | 0.126 | 0.155 | 0.79 | 0.59 | -1.04 | 1.21 | 7.47E-02 | ADGRE1                                           | intronic       |
| 3  | 89068030  | C | T | rs2132588   | 2.86E-01 | 0.114 | 0.119 | 0.95 | 0.74 | -1.23 | 5.74E-05   | 0.180 | 0.131 | 1.46 | 1.14 | -1.87 | 1.20 | 7.52E-02 | C3orf38(dist=850915), EPHA3(dist=98644)          | intergenic     |
| 20 | 62291830  | C | T | rs2738778   | 2.42E-05 | 0.088 | 0.047 | 1.97 | 1.45 | -2.68 | 1.07E-01   | 0.052 | 0.076 | 0.66 | 0.44 | -1    | 1.28 | 7.52E-02 | RTEL1-TNFRSF6B                                   | ncRNA_intronic |
| 9  | 4166452   | A | T | rs80334230  | 4.21E-01 | 0.073 | 0.083 | 0.87 | 0.64 | -1.19 | 4.87E-05   | 0.105 | 0.060 | 1.83 | 1.34 | -2.5  | 1.27 | 7.54E-02 | GLIS3                                            | intronic       |
| 13 | 68310742  | T | C | rs116121014 | 8.82E-01 | 0.031 | 0.034 | 0.90 | 0.57 | -1.44 | 6.01E-05   | 0.049 | 0.027 | 1.82 | 1.17 | -2.84 | 1.49 | 7.56E-02 | LINC00364(dist=356616), LINC00550(dist=1124675)  | intergenic     |
| 20 | 7454374   | C | T | rs116833243 | 6.06E-01 | 0.022 | 0.026 | 0.84 | 0.49 | -1.45 | 6.19E-05   | 0.046 | 0.026 | 1.81 | 1.14 | -2.85 | 1.58 | 7.56E-02 | MIR8062(dist=102035), HAO1(dist=409257)          | intergenic     |
| 13 | 68311537  | G | A | rs140346548 | 8.81E-01 | 0.031 | 0.034 | 0.90 | 0.57 | -1.44 | 5.83E-05   | 0.049 | 0.027 | 1.82 | 1.17 | -2.84 | 1.49 | 7.57E-02 | LINC00364(dist=357411), LINC00550(dist=1123880)  | intergenic     |
| 14 | 91723540  | G | A | rs60286356  | 2.34E-01 | 0.033 | 0.043 | 0.76 | 0.48 | -1.18 | 5.40E-06   | 0.065 | 0.030 | 2.27 | 1.53 | -3.37 | 1.39 | 7.59E-02 | GPR68(dist=3316), CCDC88C(dist=14127)            | intergenic     |
| 19 | 6917682   | T | C | rs35357426  | 4.38E-05 | 0.179 | 0.127 | 1.49 | 1.2  | -1.86 | 7.51E-02   | 0.126 | 0.155 | 0.78 | 0.59 | -1.04 | 1.21 | 7.62E-02 | ADGRE1                                           | intronic       |
| 19 | 36077867  | G | A | rs59008780  | 4.31E-01 | 0.025 | 0.030 | 0.84 | 0.5  | -1.41 | 1.81E-05   | 0.050 | 0.029 | 1.76 | 1.14 | -2.73 | 1.65 | 7.65E-02 | ATP4A(dist=23307), LOC102723617(dist=10930)      | intergenic     |
| 12 | 53821330  | C | T | rs73313203  | 3.29E-01 | 0.037 | 0.046 | 0.79 | 0.52 | -1.21 | 5.73E-05   | 0.083 | 0.044 | 1.96 | 1.38 | -2.77 | 1.34 | 7.67E-02 | AMHR2                                            | intronic       |
| 13 | 68317622  | C | G | rs115976056 | 8.69E-01 | 0.031 | 0.035 | 0.90 | 0.57 | -1.43 | 4.55E-05   | 0.049 | 0.027 | 1.83 | 1.17 | -2.85 | 1.48 | 7.69E-02 | LINC00364(dist=363496), LINC00550(dist=1117795)  | intergenic     |
| 15 | 95914434  | A | G | rs76401390  | 1.61E-01 | 0.035 | 0.046 | 0.75 | 0.49 | -1.16 | 5.16E-06   | 0.076 | 0.036 | 2.20 | 1.53 | -3.17 | 1.36 | 7.70E-02 | LINC01197(dist=44105), LINC00924(dist=61888)     | intergenic     |
| 11 | 17274198  | G | A | rs61881886  | 1.93E-01 | 0.055 | 0.065 | 0.83 | 0.59 | -1.19 | 1.09E-05   | 0.124 | 0.082 | 1.59 | 1.19 | -2.12 | 1.27 | 7.71E-02 | PIK3C2A(dist=82844), NUCB2(dist=24088)           | intergenic     |
| 2  | 51534120  | T | A | rs76828879  | 2.49E-01 | 0.028 | 0.034 | 0.81 | 0.5  | -1.33 | 2.00E-05   | 0.060 | 0.035 | 1.74 | 1.16 | -2.6  | 1.52 | 7.76E-02 | NRXN1(dist=274446), MIR4431(dist=1395540)        | intergenic     |
| 6  | 32478129  | G | A | rs112696801 | 2.43E-05 | 0.305 | 0.362 | 0.77 | 0.65 | -0.92 | 6.57E-02   | 0.336 | 0.376 | 0.84 | 0.69 | -1.02 | 0.80 | 7.77E-02 | HLA-DRA(dist=65303), HLA-DRB5(dist=7025)         | intergenic     |
| 14 | 91703294  | G | A | rs141559466 | 2.19E-01 | 0.032 | 0.042 | 0.74 | 0.47 | -1.17 | 2.16E-06   | 0.069 | 0.033 | 2.14 | 1.46 | -3.14 | 1.39 | 7.77E-02 | GPR68                                            | intronic       |
| 2  | 151495246 | C | T | rs7586113   | 5.81E-01 | 0.081 | 0.091 | 0.87 | 0.65 | -1.18 | 3.80E-05   | 0.118 | 0.074 | 1.67 | 1.25 | -2.24 | 1.26 | 7.82E-02 | LOC101929282(dist=3375), RBM43(dist=609482)      | intergenic     |
| 15 | 95924597  | A | G | rs77866863  | 1.80E-01 | 0.032 | 0.043 | 0.73 | 0.47 | -1.16 | 3.52E-06   | 0.075 | 0.035 | 2.21 | 1.53 | -3.19 | 1.35 | 7.87E-02 | LINC01197(dist=54268), LINC00924(dist=51725)     | intergenic     |
| 8  | 15659117  | G | T | rs78406848  | 3.57E-01 | 0.037 | 0.044 | 0.84 | 0.55 | -1.29 | 7.31E-06   | 0.071 | 0.040 | 1.82 | 1.25 | -2.64 | 1.43 | 7.92E-02 | TUSC3(dist=34959), MSR1(dist=306270)             | intergenic     |
| 14 | 91702443  | C | T | rs57455752  | 2.20E-01 | 0.032 | 0.042 | 0.74 | 0.47 | -1.17 | 2.15E-06   | 0.069 | 0.033 | 2.13 | 1.46 | -3.13 | 1.38 | 7.97E-02 | GPR68                                            | intronic       |
| 16 | 51437623  | G | A | rs115426166 | 3.91E-05 | 0.045 | 0.094 | 0.45 | 0.31 | -0.66 | 2.04E-02   | 0.105 | 0.075 | 1.44 | 1.06 | -1.96 | 0.80 | 8.01E-02 | SALL1(dist=252440), LINC01571(dist=358807)       | intergenic     |
| 15 | 90921011  | A | T | rs74038641  | 3.88E-01 | 0.020 | 0.026 | 0.77 | 0.43 | -1.36 | 2.21E-05   | 0.049 | 0.022 | 2.25 | 1.43 | -3.53 | 1.49 | 8.06E-02 | ZNF774(dist=16296), IQGAP1(dist=10462)           | intergenic     |
| 13 | 50618384  | G | C | rs78186686  | 3.75E-01 | 0.021 | 0.027 | 0.77 | 0.44 | -1.34 | 4.91E-05   | 0.051 | 0.023 | 2.29 | 1.47 | -3.56 | 1.45 | 8.06E-02 | DLEU2                                            | ncRNA_intronic |
| 13 | 68365952  | C | A | rs116259969 | 7.69E-01 | 0.056 | 0.062 | 0.90 | 0.63 | -1.28 | 1.54E-06   | 0.068 | 0.038 | 1.84 | 1.26 | -2.69 | 1.34 | 8.09E-02 | LINC00364(dist=411826), LINC00550(dist=1069465)  | intergenic     |
| 15 | 83367732  | C | T | rs17841169  | 1.85E-01 | 0.185 | 0.211 | 0.85 | 0.69 | -1.04 | 1.28E-05   | 0.279 | 0.198 | 1.57 | 1.27 | -1.94 | 1.15 | 8.12E-02 | AP3B2                                            | intronic       |
| 14 | 91767234  | G | C | rs74084727  | 3.65E-01 | 0.032 | 0.039 | 0.82 | 0.52 | -1.29 | 1.59E-05   | 0.061 | 0.029 | 2.15 | 1.44 | -3.22 | 1.39 | 8.18E-02 | CCDC88C                                          | intronic       |
| 8  | 5237174   | G | T | rs17073240  | 2.61E-01 | 0.032 | 0.042 | 0.76 | 0.49 | -1.2  | 1.08E-05   | 0.072 | 0.033 | 2.25 | 1.54 | -3.27 | 1.36 | 8.23E-02 | CSMD1(dist=384846), LOC100287015(dist=1023903)   | intergenic     |
| 8  | 5237818   | C | A | rs80231806  | 3.74E-01 | 0.031 | 0.039 | 0.81 | 0.51 | -1.27 | 4.70E-05   | 0.066 | 0.031 | 2.21 | 1.5  | -3.28 | 1.37 | 8.27E-02 | CSMD1(dist=385490), LOC100287015(dist=1023259)   | intergenic     |
| 2  | 78009118  | C | T | rs6743371   | 1.53E-01 | 0.016 | 0.025 | 0.65 | 0.35 | -1.21 | 2.83E-05   | 0.055 | 0.024 | 2.43 | 1.59 | -3.73 | 1.45 | 8.27E-02 | LOC101927967                                     | ncRNA_intronic |
| 6  | 155880958 | T | A | rs4869862   | 2.16E-01 | 0.151 | 0.162 | 1.09 | 0.87 | -1.37 | 3.82E-05   | 0.245 | 0.187 | 0.71 | 0.57 | -0.88 | 0.85 | 8.27E-02 | NOX3(dist=103921), MIR1202(dist=386973)          | intergenic     |
| 16 | 81795129  | T | A | rs114848866 | 7.91E-02 | 0.050 | 0.040 | 1.25 | 0.86 | -1.83 | 5.10E-05   | 0.053 | 0.035 | 1.54 | 1.01 | -2.35 | 1.56 | 8.28E-02 | CMIP(dist=49762), PLCG2(dist=17734)              | intergenic     |
| 2  | 2301126   | G | A | rs78043822  | 4.47E-05 | 0.045 | 0.023 | 2.02 | 1.32 | -3.1  | 4.59E-02   | 0.011 | 0.023 | 0.49 | 0.21 | -1.17 | 1.50 | 8.29E-02 | MYT1L                                            | intronic       |
| 14 | 91707329  | G | A | rs77202959  | 1.92E-01 | 0.032 | 0.043 | 0.73 | 0.46 | -1.15 | 1.98E-06   | 0.070 | 0.034 | 2.17 | 1.48 | -3.17 | 1.37 | 8.30E-02 | GPR68                                            | intronic       |
| 16 | 57045964  | C | G | rs62035538  | 4.91E-05 | 0.061 | 0.093 | 0.63 | 0.45 | -0.88 | 4.76E-02   | 0.144 | 0.129 | 1.13 | 0.87 | -1.48 | 0.80 | 8.33E-02 | CETP(dist=28208), NLR5(dist=5022)                | intergenic     |
| 7  | 109364876 | A | G | rs12216552  | 2.46E-01 | 0.120 | 0.128 | 0.93 | 0.72 | -1.19 | 1.54E-05   | 0.198 | 0.145 | 1.45 | 1.15 | -1.84 | 1.21 | 8.33E-02 | C7orf66(dist=840232), EIF3IP1(dist=234408)       | intergenic     |
| 5  | 2911613   | C | T | rs75234031  | 4.12E-01 | 0.043 | 0.053 | 0.82 | 0.55 | -1.21 | 2.53E-05   | 0.071 | 0.038 | 1.93 | 1.33 | -2.81 | 1.35 | 8.34E-02 | C5orf38(dist=156102), LINC01377(dist=266336)     | intergenic     |
| 10 | 54482915  | C | T | rs58163215  | 7.72E-02 | 0.022 | 0.035 | 0.62 | 0.36 | -1.06 | 9.66E-06   | 0.046 | 0.027 | 1.74 | 1.1  | -2.74 | 0.64 | 8.43E-02 | LINC01468(dist=252622), MBL2(dist=42225)         | intergenic     |
| 16 | 51440098  | G | A | rs116606653 | 3.41E-05 | 0.045 | 0.095 | 0.45 | 0.31 | -0.65 | 1.59E-02   | 0.106 | 0.076 | 1.45 | 1.07 | -1.98 | 0.81 | 8.43E-02 | SALL1(dist=254915), LINC01571(dist=356332)       | intergenic     |
| 8  | 15658604  | A | G | rs79392246  | 3.47E-01 | 0.038 | 0.045 | 0.84 | 0.55 | -1.28 | 8.75E-06   | 0.073 | 0.042 | 1.80 | 1.24 | -2.6  | 1.41 | 8.46E-02 | TUSC3(dist=34446), MSR1(dist=306783)             | intergenic     |
| 5  | 18194371  | G | A | rs76321044  | 2.82E-01 | 0.016 | 0.023 | 0.70 | 0.38 | -1.31 | 3.27E-05   | 0.042 | 0.021 | 2.08 | 1.29 | -3.37 | 1.62 | 8.51E-02 | LOC401177(dist=806952), CDH18(dist=1278784)      | intergenic     |
| 12 | 117999196 | G | T | rs73405367  | 4.04E-05 | 0.080 | 0.050 | 1.66 | 1.21 | -2.27 | 4.44E-02   | 0.036 | 0.051 | 0.70 | 0.43 | -1.15 | 1.32 | 8.54E-02 | KSR2                                             | intronic       |
| 14 | 91728296  | G | A | rs56927882  | 2.40E-01 | 0.030 | 0.040 | 0.75 | 0.47 | -1.2  | 5.13E-06   | 0.063 | 0.029 | 2.26 | 1.52 | -3.38 | 1.38 | 8.54E-02 | GPR68(dist=8072), CCDC88C(dist=9371)             | intergenic     |
| 16 | 80759991  | T | C | rs76747055  | 2.15E-01 | 0.029 | 0.040 | 0.72 | 0.45 | -1.15 | 3.05E-05   | 0.060 | 0.028 | 2.25 | 1.5  | -3.39 | 1.39 | 8.58E-02 | CDYL2                                            | intronic       |
| 14 | 95969513  | A | C | rs179163    | 2.49E-01 | 0.272 | 0.279 | 1.04 | 0.86 | -1.25 | 3.94E-05   | 0.403 | 0.342 | 0.77 | 0.64 | -0.93 | 0.87 | 8.59E-02 | SYNE3(dist=27340), SNHG10(dist=29736)            | intergenic     |
| 18 | 37585623  | C | T | rs116748326 | 2.39E-01 | 0.019 | 0.028 | 0.69 | 0.39 | -1.22 | 6.27E-05   | 0.051 | 0.022 | 2.39 | 1.54 | -3.73 | 1.45 | 8.61E-02 | LINC00669(dist=253664), LINC01477(dist=60627)    | intergenic     |
| 14 | 91728342  | A | C | rs60220168  | 2.31E-01 | 0.047 | 0.057 | 0.81 | 0.56 | -1.19 | 1.71E-06   | 0.078 | 0.042 | 1.96 | 1.37 | -2.8  | 1.34 | 8.63E-02 | GPR68(dist=8118), CCDC88C(dist=9325)             | intergenic     |
| 12 | 12103432  | T | C | rs57589993  | 8.76E-02 | 0.043 | 0.061 | 0.69 | 0.46 | -1.01 | 4.28E-05   | 0.075 | 0.048 | 1.60 | 1.12 | -2.3  | 0.71 | 8.64E-02 | RNU6-19P(dist=24325), BCL2L14(dist=120446)       | intergenic     |
| 14 | 91724496  | A | T | rs74086346  | 2.12E-01 | 0.031 | 0.041 | 0.74 | 0.47 | -1.17 | 5.36E-06   | 0.065 | 0.030 | 2.27 | 1.53 | -3.37 | 1.37 | 8.65E-02 | GPR68(dist=4272), CCDC88C(dist=13171)            | intergenic     |
| 11 | 17261588  | A | G | rs72862099  | 1.41E-01 | 0.049 | 0.061 | 0.80 | 0.55 | -1.16 | 5.15E-06   | 0.123 | 0.081 | 1.60 | 1.2  | -2.13 | 1.26 | 8.71E-02 | PIK3C2A(dist=70234), NUCB2(dist=36698)           | intergenic     |
| 18 | 6858889   | C | T | rs17083274  | 2.36E-01 | 0.021 | 0.032 | 0.67 | 0.39 | -1.15 | 5.07E-07   | 0.054 | 0.024 | 2.34 | 1.52 | -3.6  | 1.45 | 8.77E-02 | GTSR1(dist=240806), LINC01541(dist=628301)       | intergenic     |
| 12 | 106556404 | A | G | rs2559600   | 2.82E-01 | 0.137 | 0.152 | 1.13 | 0.89 | -1.42 | 4.46E-05   | 0.199 | 0.140 | 0.66 | 0.52 | -0.83 | 0.85 | 8.78E-02 | NUAK1(dist=22593), CKAP4(dist=75255)             | intergenic     |
| 7  | 79311093  | G | A | rs114083371 | 7.22E-01 | 0.042 | 0.049 | 0.86 | 0.58 | -1.29 | 9.26E-06   | 0.053 | 0.025 | 2.16 | 1.41 | -3.33 | 1.36 | 8.78E-02 | MAGI2-AS3(dist=210569), MIR548M(dist=89479)      | intergenic     |
| 8  | 48080668  | T | C | rs112430602 | 3.05E-01 | 0.025 | 0.035 | 0.72 | 0.43 | -1.19 | 4.35E-05   | 0.058 | 0.026 | 2.33 | 1.54 | -3.53 | 1.39 | 8.79E-02 | LINC00293(dist=313261), LOC100287846(dist=20262) | intergenic     |
| 16 | 51437884  | G | T | rs114553085 | 3.75E-05 | 0.045 | 0.094 | 0.45 | 0.31 | -0.66 | 1.61E-02   | 0.106 | 0.076 | 1.45 | 1.07 | -1.98 | 0.81 | 8.81E-02 | SALL1(dist=252701), LINC01571(dist=358546)       | intergenic     |
| 6  | 51605659  | A | G | rs76114040  | 1.48E-01 | 0.020 | 0.028 | 0.71 | 0.4  | -1.24 | 1.11E-05</ |       |       |      |      |       |      |          |                                                  |                |

|    |           |   |   |                       |          |       |       |      |      |       |          |       |        |      |      |       |      |          |                                                   |                |
|----|-----------|---|---|-----------------------|----------|-------|-------|------|------|-------|----------|-------|--------|------|------|-------|------|----------|---------------------------------------------------|----------------|
| 8  | 19082329  | A | G | rs143876730           | 4.98E-01 | 0.044 | 0.053 | 0.83 | 0.57 | -1.23 | 3.36E-05 | 0.089 | 0.055  | 1.67 | 1.19 | -2.33 | 1.33 | 9.36E-02 | LOC100128993                                      | ncRNA_intronic |
| 2  | 78023075  | A | G | rs116760332           | 1.42E-01 | 0.016 | 0.025 | 0.64 | 0.34 | -1.2  | 3.43E-05 | 0.056 | 0.024  | 2.38 | 1.56 | -3.65 | 1.44 | 9.37E-02 | LOC101927967                                      | ncRNA_intronic |
| 9  | 93747845  | C | T | rs72731351            | 1.74E-01 | 0.028 | 0.033 | 0.85 | 0.52 | -1.38 | 2.31E-05 | 0.075 | 0.046  | 1.68 | 1.17 | -2.41 | 1.39 | 9.43E-02 | SYK(dist=87003), LOC100129316(dist=77731)         | intergenic     |
| 20 | 62302650  | C | G | rs6011016             | 4.51E-05 | 0.104 | 0.059 | 0.55 | 0.41 | -0.72 | 7.23E-02 | 0.058 | 0.085  | 1.53 | 1.03 | -2.27 | 0.81 | 9.44E-02 | RTL1-TNFRSF6B                                     | ncRNA_intronic |
| 8  | 18408660  | C | G | rs6909849             | 2.33E-01 | 0.395 | 0.422 | 1.12 | 0.95 | -1.32 | 2.71E-05 | 0.497 | 0.396  | 0.66 | 0.55 | -0.8  | 0.90 | 9.52E-02 | PSD3                                              | intronic       |
| 11 | 17164547  | T | C | rs61879714            | 2.75E-01 | 0.090 | 0.103 | 0.87 | 0.66 | -1.15 | 6.13E-05 | 0.162 | 0.112  | 1.52 | 1.18 | -1.97 | 1.20 | 9.54E-02 | PIK3C2A                                           | intronic       |
| 5  | 18284868  | C | T | rs143668929           | 1.05E-01 | 0.034 | 0.048 | 0.69 | 0.45 | -1.07 | 1.70E-06 | 0.073 | 0.034  | 2.23 | 1.54 | -3.24 | 1.33 | 9.62E-02 | LOC401177(dist=897449), CDH18(dist=1188287)       | intergenic     |
| 12 | 106580623 | C | G | rs1148434             | 2.48E-01 | 0.166 | 0.183 | 1.12 | 0.9  | -1.39 | 6.04E-05 | 0.245 | 0.177  | 0.67 | 0.53 | -0.83 | 0.87 | 9.62E-02 | NUAK1(dist=46812), CKAP4(dist=51036)              | intergenic     |
| 13 | 41288655  | A | G | rs2480176             | 2.78E-01 | 0.031 | 0.038 | 0.82 | 0.52 | -1.3  | 3.30E-05 | 0.058 | 0.031  | 1.96 | 1.3  | -2.96 | 1.45 | 9.64E-02 | FOXO1(dist=47921), MIR320D1(dist=13309)           | intergenic     |
| 4  | 47871122  | A | C | rs111364531           | 3.69E-01 | 0.026 | 0.035 | 0.74 | 0.45 | -1.21 | 5.96E-05 | 0.054 | 0.024  | 2.32 | 1.51 | -3.57 | 1.39 | 9.65E-02 | LINC00293(dist=103715), LOC100287846(dist=229808) | intergenic     |
| 13 | 78866716  | G | A | rs77615522            | 7.20E-01 | 0.048 | 0.053 | 0.90 | 0.62 | -1.32 | 4.60E-05 | 0.069 | 0.041  | 1.72 | 1.18 | -2.5  | 1.33 | 9.65E-02 | RNF219-AS1                                        | ncRNA_intronic |
| 2  | 23489854  | T | C | rs10490017            | 4.06E-01 | 0.068 | 0.079 | 0.86 | 0.62 | -1.18 | 2.87E-05 | 0.102 | 0.060  | 1.78 | 1.3  | -2.44 | 1.25 | 9.69E-02 | TRPM8                                             | intronic       |
| 18 | 37580429  | T | C | rs143873598           | 2.14E-01 | 0.019 | 0.027 | 0.67 | 0.37 | -1.2  | 6.24E-05 | 0.051 | 0.022  | 2.39 | 1.54 | -3.73 | 1.43 | 9.70E-02 | LINC00669(dist=248470), LINC01477(dist=65821)     | intergenic     |
| 15 | 101570703 | C | T | rs72766819            | 2.60E-01 | 0.044 | 0.050 | 0.86 | 0.58 | -1.27 | 3.27E-05 | 0.100 | 0.066  | 1.57 | 1.14 | -2.15 | 1.31 | 9.70E-02 | LRRK1                                             | intronic       |
| 13 | 68365317  | C | T | rs114560208           | 6.34E-01 | 0.052 | 0.060 | 0.86 | 0.6  | -1.24 | 1.43E-06 | 0.068 | 0.038  | 1.85 | 1.26 | -2.7  | 1.34 | 9.72E-02 | LINC00364(dist=411191), LINC00550(dist=1070100)   | intergenic     |
| 4  | 72735060  | C | A | rs142160757           | 3.69E-01 | 0.024 | 0.030 | 0.79 | 0.47 | -1.33 | 1.48E-05 | 0.049 | 0.025  | 2.04 | 1.3  | -3.18 | 1.45 | 9.75E-02 | GC(dist=63823), NPFFR2(dist=162461)               | intergenic     |
| 8  | 15657744  | G | C | rs76187578            | 3.11E-01 | 0.037 | 0.044 | 0.83 | 0.54 | -1.26 | 8.23E-06 | 0.072 | 0.041  | 1.82 | 1.26 | -2.64 | 1.39 | 9.78E-02 | TUSC3(dist=33586), MSR1(dist=307643)              | intergenic     |
| 13 | 112671036 | G | A | rs12100178            | 3.27E-01 | 0.080 | 0.096 | 0.82 | 0.61 | -1.1  | 2.32E-05 | 0.123 | 0.073  | 1.78 | 1.33 | -2.38 | 1.22 | 9.78E-02 | LINC00403                                         | ncRNA_intronic |
| 2  | 12651296  | C | T | rs17367794            | 5.69E-01 | 0.028 | 0.031 | 0.88 | 0.54 | -1.45 | 5.97E-05 | 0.050 | 0.031  | 1.64 | 1.06 | -2.54 | 1.55 | 9.82E-02 | LOC100506457                                      | ncRNA_intronic |
| 2  | 12651481  | C | A | rs62126674            | 5.68E-01 | 0.028 | 0.031 | 0.88 | 0.54 | -1.45 | 6.08E-05 | 0.050 | 0.031  | 1.64 | 1.06 | -2.54 | 1.54 | 9.86E-02 | LOC100506457                                      | ncRNA_intronic |
| 19 | 8207284   | G | A | rs113798795           | 6.60E-01 | 0.032 | 0.037 | 0.86 | 0.54 | -1.35 | 1.41E-05 | 0.047 | 0.024  | 2.04 | 1.29 | -3.21 | 1.41 | 9.86E-02 | FBN3                                              | intronic       |
| 20 | 46036526  | G | A | rs115965002           | 2.92E-01 | 0.030 | 0.039 | 0.75 | 0.47 | -1.2  | 2.98E-05 | 0.067 | 0.037  | 1.89 | 1.29 | -2.77 | 1.38 | 9.86E-02 | ZMYND8(dist=50893), NCOA3(dist=94075)             | intergenic     |
| 11 | 17288592  | C | G | rs61881916            | 1.29E-01 | 0.053 | 0.065 | 0.80 | 0.56 | -1.15 | 7.37E-06 | 0.123 | 0.081  | 1.59 | 1.19 | -2.12 | 1.26 | 9.89E-02 | PIK3C2A(dist=97238), NUCB2(dist=9694)             | intergenic     |
| 11 | 17428333  | G | A | rs61881889            | 1.49E-01 | 0.050 | 0.061 | 0.81 | 0.56 | -1.17 | 1.38E-05 | 0.122 | 0.081  | 1.57 | 1.18 | -2.1  | 1.26 | 9.91E-02 | PIK3C2A(dist=92979), NUCB2(dist=13953)            | intergenic     |
| 20 | 62275844  | T | C | rs6010986;rs386816166 | 1.78E-05 | 0.140 | 0.098 | 0.65 | 0.51 | -0.82 | 7.86E-02 | 0.097 | -0.126 | 1.33 | 0.97 | -1.82 | 0.82 | 1.01E-01 | STMN3                                             | intronic       |
| 18 | 5355414   | C | G | rs75669293            | 9.86E-02 | 0.106 | 0.092 | 1.17 | 0.89 | -1.53 | 6.75E-06 | 0.125 | 0.085  | 1.53 | 1.15 | -2.04 | 1.28 | 1.01E-01 | ZBTB14(dist=58362), EPB41L3(dist=36966)           | intergenic     |
| 5  | 18240753  | A | C | rs139010164           | 1.05E-01 | 0.032 | 0.047 | 0.67 | 0.43 | -1.06 | 1.82E-06 | 0.070 | 0.032  | 2.30 | 1.58 | -3.37 | 1.33 | 1.01E-01 | LOC401177(dist=853334), CDH18(dist=1232402)       | intergenic     |
| 5  | 18241062  | A | G | rs138256110           | 1.05E-01 | 0.032 | 0.047 | 0.67 | 0.43 | -1.06 | 1.82E-06 | 0.070 | 0.032  | 2.30 | 1.58 | -3.37 | 1.33 | 1.01E-01 | LOC401177(dist=853643), CDH18(dist=1232093)       | intergenic     |
| 5  | 18242180  | C | G | rs16887125            | 1.06E-01 | 0.032 | 0.047 | 0.67 | 0.43 | -1.06 | 1.83E-06 | 0.070 | 0.032  | 2.30 | 1.58 | -3.37 | 1.33 | 1.01E-01 | LOC401177(dist=854761), CDH18(dist=1230975)       | intergenic     |
| 6  | 51602252  | T | C | rs74474485            | 2.10E-01 | 0.022 | 0.029 | 0.74 | 0.43 | -1.27 | 6.44E-05 | 0.058 | 0.028  | 2.13 | 1.41 | -3.22 | 1.40 | 1.01E-01 | PKHD1                                             | intronic       |
| 9  | 137937927 | G | A | rs115635397           | 6.31E-01 | 0.031 | 0.036 | 0.86 | 0.54 | -1.37 | 9.12E-06 | 0.048 | 0.024  | 2.08 | 1.32 | -3.27 | 1.40 | 1.02E-01 | FCN1(dist=128121), OLFM1(dist=29162)              | intergenic     |
| 9  | 22510649  | T | G | rs115762791           | 1.81E-01 | 0.016 | 0.025 | 0.66 | 0.35 | -1.22 | 4.34E-05 | 0.050 | 0.022  | 2.39 | 1.53 | -3.74 | 1.45 | 1.02E-01 | DMRTA1(dist=58177), LINC01239(dist=135550)        | intergenic     |
| 14 | 101643081 | A | G | rs386780800;rs4906067 | 9.52E-02 | 0.041 | 0.029 | 0.70 | 0.46 | -1.08 | 7.09E-06 | 0.080 | 0.056  | 0.69 | 0.49 | -0.98 | 0.61 | 1.03E-01 | MEG9(dist=103808), LINC00524(dist=229243)         | intergenic     |
| 13 | 33922144  | C | T | rs116244203           | 3.73E-01 | 0.032 | 0.038 | 0.82 | 0.52 | -1.3  | 2.41E-05 | 0.050 | 0.025  | 2.04 | 1.31 | -3.18 | 1.48 | 1.03E-01 | STARD13                                           | intronic       |
| 5  | 18235322  | G | A | rs145658114           | 9.91E-02 | 0.032 | 0.047 | 0.67 | 0.43 | -1.06 | 1.69E-06 | 0.070 | 0.032  | 2.32 | 1.58 | -3.39 | 1.33 | 1.03E-01 | LOC401177(dist=847903), CDH18(dist=1237833)       | intergenic     |
| 8  | 48102538  | G | T | rs113794118           | 2.61E-01 | 0.026 | 0.036 | 0.70 | 0.42 | -1.16 | 4.12E-05 | 0.058 | 0.026  | 2.33 | 1.54 | -3.54 | 1.36 | 1.03E-01 | LOC100287846                                      | ncRNA_exonic   |
| 5  | 18244576  | C | T | rs140839736           | 1.03E-01 | 0.032 | 0.047 | 0.67 | 0.43 | -1.06 | 1.86E-06 | 0.070 | 0.032  | 2.30 | 1.57 | -3.36 | 1.33 | 1.03E-01 | LOC401177(dist=857157), CDH18(dist=1228579)       | intergenic     |
| 10 | 18450970  | G | A | rs56276305            | 3.46E-05 | 0.048 | 0.020 | 2.48 | 1.62 | -3.79 | 8.91E-02 | 0.029 | 0.044  | 0.64 | 0.37 | -1.12 | 1.39 | 1.04E-01 | CACNB2                                            | intronic       |
| 10 | 17517440  | G | T | rs111460860           | 3.25E-01 | 0.051 | 0.062 | 0.81 | 0.56 | -1.17 | 5.23E-05 | 0.086 | 0.046  | 1.92 | 1.37 | -2.71 | 1.28 | 1.04E-01 | ST8SIA6(dist=21186), HACD1(dist=114518)           | intergenic     |
| 4  | 72735562  | A | G | rs115645136           | 3.66E-01 | 0.024 | 0.030 | 0.79 | 0.47 | -1.33 | 1.97E-05 | 0.049 | 0.025  | 2.00 | 1.28 | -3.13 | 1.44 | 1.04E-01 | GC(dist=64325), NPFFR2(dist=161959)               | intergenic     |
| 10 | 17520185  | C | T | rs77961728            | 3.03E-01 | 0.050 | 0.062 | 0.80 | 0.56 | -1.16 | 3.49E-05 | 0.085 | 0.045  | 1.95 | 1.38 | -2.75 | 1.28 | 1.04E-01 | ST8SIA6(dist=23931), HACD1(dist=111773)           | intergenic     |
| 5  | 18255275  | G | A | rs141001604           | 9.65E-02 | 0.031 | 0.046 | 0.67 | 0.42 | -1.05 | 1.99E-06 | 0.071 | 0.032  | 2.29 | 1.57 | -3.34 | 1.33 | 1.04E-01 | LOC401177(dist=867856), CDH18(dist=1217880)       | intergenic     |
| 5  | 18245454  | G | C | rs148141370           | 1.03E-01 | 0.032 | 0.047 | 0.67 | 0.43 | -1.06 | 1.87E-06 | 0.070 | 0.032  | 2.30 | 1.57 | -3.36 | 1.33 | 1.04E-01 | LOC401177(dist=858035), CDH18(dist=1227701)       | intergenic     |
| 19 | 8208913   | C | T | rs77166896            | 6.83E-01 | 0.032 | 0.037 | 0.86 | 0.54 | -1.36 | 5.71E-05 | 0.048 | 0.024  | 2.01 | 1.28 | -3.16 | 1.39 | 1.04E-01 | FBN3                                              | intronic       |
| 5  | 18260384  | G | A | rs144191094           | 9.52E-02 | 0.031 | 0.046 | 0.66 | 0.42 | -1.05 | 1.97E-06 | 0.071 | 0.032  | 2.29 | 1.57 | -3.34 | 1.33 | 1.04E-01 | LOC401177(dist=872965), CDH18(dist=1212771)       | intergenic     |
| 5  | 18261780  | C | G | rs142711844           | 9.52E-02 | 0.031 | 0.046 | 0.66 | 0.42 | -1.05 | 1.97E-06 | 0.071 | 0.032  | 2.29 | 1.57 | -3.34 | 1.33 | 1.05E-01 | LOC401177(dist=874361), CDH18(dist=1211375)       | intergenic     |
| 2  | 173325489 | C | T | rs71415299            | 4.86E-01 | 0.020 | 0.021 | 0.93 | 0.52 | -1.66 | 3.23E-05 | 0.045 | 0.030  | 1.56 | 0.99 | -2.46 | 1.58 | 1.05E-01 | ITGA6                                             | intronic       |
| 13 | 33860516  | C | T | rs116391379           | 5.77E-01 | 0.043 | 0.048 | 0.87 | 0.59 | -1.3  | 1.76E-05 | 0.055 | 0.031  | 1.86 | 1.22 | -2.83 | 1.43 | 1.05E-01 | STARD13                                           | intronic       |
| 20 | 46035470  | C | T | rs149980555           | 2.81E-01 | 0.029 | 0.039 | 0.74 | 0.46 | -1.19 | 3.06E-05 | 0.067 | 0.037  | 1.88 | 1.28 | -2.76 | 1.37 | 1.05E-01 | ZMYND8(dist=49837), NCOA3(dist=95131)             | intergenic     |
| 5  | 18246797  | C | G | rs147463543           | 1.01E-01 | 0.032 | 0.046 | 0.67 | 0.43 | -1.05 | 1.92E-06 | 0.070 | 0.032  | 2.30 | 1.57 | -3.36 | 1.33 | 1.05E-01 | LOC401177(dist=859378), CDH18(dist=1226358)       | intergenic     |
| 11 | 17249502  | T | G | rs61881880            | 1.70E-01 | 0.049 | 0.060 | 0.81 | 0.56 | -1.18 | 2.99E-05 | 0.121 | 0.081  | 1.57 | 1.17 | -2.09 | 1.24 | 1.06E-01 | PIK3C2A(dist=58148), NUCB2(dist=48784)            | intergenic     |
| 12 | 106549722 | G | A | rs145400343           | 5.32E-05 | 0.063 | 0.035 | 1.86 | 1.3  | -2.65 | 2.01E-02 | 0.020 | 0.037  | 0.53 | 0.27 | -1.01 | 1.33 | 1.06E-01 | NUAK1(dist=15911), CKAP4(dist=81937)              | intergenic     |
| 5  | 18267003  | T | C | rs137909374           | 9.30E-02 | 0.031 | 0.046 | 0.66 | 0.42 | -1.04 | 1.97E-06 | 0.071 | 0.032  | 2.29 | 1.57 | -3.34 | 1.32 | 1.06E-01 | LOC401177(dist=879584), CDH18(dist=1206152)       | intergenic     |
| 5  | 18247646  | G | T | rs146669505           | 1.00E-01 | 0.032 | 0.046 | 0.67 | 0.43 | -1.05 | 1.95E-06 | 0.070 | 0.032  | 2.30 | 1.57 | -3.36 | 1.32 | 1.07E-01 | LOC401177(dist=860227), CDH18(dist=1225509)       | intergenic     |
| 11 | 21489144  | C | A | rs192571917           | 3.01E-01 | 0.038 | 0.048 | 0.78 | 0.52 | -1.19 | 9.04E-06 | 0.062 | 0.031  | 2.07 | 1.39 | -3.09 | 1.36 | 1.07E-01 | NELL1                                             | intronic       |
| 5  | 18250364  | C | T | rs146005795           | 1.00E-01 | 0.032 | 0.046 | 0.67 | 0.43 | -1.05 | 1.88E-06 | 0.070 | 0.032  | 2.30 | 1.5  |       |      |          |                                                   |                |

|    |           |   |   |                                                |          |       |       |      |      |       |          |       |       |      |      |       |      |          |                                                 |                |
|----|-----------|---|---|------------------------------------------------|----------|-------|-------|------|------|-------|----------|-------|-------|------|------|-------|------|----------|-------------------------------------------------|----------------|
| 11 | 110295992 | A | G | rs77067739                                     | 4.96E-01 | 0.069 | 0.081 | 0.84 | 0.61 | -1.15 | 1.99E-05 | 0.085 | 0.049 | 1.81 | 1.29 | -2.56 | 1.26 | 1.12E-01 | RDX(dist=128555), FDX1(dist=4669)               | intergenic     |
| 14 | 91720028  | G | C | rs75866218                                     | 1.80E-01 | 0.031 | 0.042 | 0.72 | 0.46 | -1.15 | 9.79E-06 | 0.064 | 0.030 | 2.24 | 1.51 | -3.33 | 1.34 | 1.12E-01 | GPR68                                           | intronic       |
| 13 | 112673544 | T | C | rs79177424                                     | 3.02E-01 | 0.079 | 0.096 | 0.81 | 0.6  | -1.09 | 2.72E-05 | 0.122 | 0.073 | 1.78 | 1.33 | -2.38 | 1.21 | 1.12E-01 | LINC00403                                       | ncRNA_intronic |
| 8  | 62457714  | C | T | rs10101416                                     | 1.61E-01 | 0.322 | 0.277 | 1.24 | 1.04 | -1.48 | 2.26E-05 | 0.249 | 0.356 | 0.60 | 0.48 | -0.74 | 0.89 | 1.13E-01 | ASPH                                            | intronic       |
| 12 | 106539118 | A | G | rs1215611                                      | 1.49E-01 | 0.110 | 0.129 | 1.19 | 0.92 | -1.54 | 2.96E-05 | 0.186 | 0.127 | 0.64 | 0.5  | -0.81 | 0.85 | 1.13E-01 | NUAK1(dist=5307), CKAP4(dist=92541)             | intergenic     |
| 8  | 62456814  | C | T | rs10109999                                     | 1.61E-01 | 0.322 | 0.277 | 1.24 | 1.04 | -1.48 | 2.29E-05 | 0.249 | 0.356 | 0.60 | 0.48 | -0.74 | 0.89 | 1.13E-01 | ASPH                                            | intronic       |
| 13 | 43839494  | G | A | rs4306408                                      | 2.88E-01 | 0.095 | 0.111 | 1.18 | 0.9  | -1.55 | 5.52E-05 | 0.117 | 0.067 | 0.54 | 0.4  | -0.73 | 0.82 | 1.13E-01 | ENOX1                                           | intronic       |
| 8  | 62460886  | A | G | rs10113272                                     | 1.48E-01 | 0.324 | 0.278 | 1.24 | 1.04 | -1.48 | 1.92E-05 | 0.248 | 0.356 | 0.60 | 0.48 | -0.74 | 0.89 | 1.14E-01 | ASPH                                            | intronic       |
| 8  | 62459486  | C | G | rs4737587                                      | 1.53E-01 | 0.323 | 0.277 | 1.24 | 1.04 | -1.48 | 2.09E-05 | 0.249 | 0.356 | 0.60 | 0.48 | -0.74 | 0.89 | 1.14E-01 | ASPH                                            | intronic       |
| 14 | 91720222  | G | A | rs58519157                                     | 1.80E-01 | 0.032 | 0.044 | 0.73 | 0.46 | -1.14 | 8.86E-06 | 0.067 | 0.032 | 2.19 | 1.48 | -3.22 | 1.33 | 1.14E-01 | GPR68(NM_003485:c.-18828C>T)                    | UTR5           |
| 5  | 18267320  | G | A | rs143412083                                    | 9.09E-02 | 0.031 | 0.047 | 0.66 | 0.42 | -1.04 | 2.58E-06 | 0.071 | 0.033 | 2.26 | 1.55 | -3.29 | 1.32 | 1.14E-01 | LOC401177(dist=879901), CDH18(dist=1205835)     | intergenic     |
| 14 | 91683409  | G | A | rs74086306                                     | 3.68E-01 | 0.019 | 0.024 | 0.78 | 0.43 | -1.39 | 1.94E-05 | 0.040 | 0.020 | 2.01 | 1.23 | -3.29 | 1.55 | 1.15E-01 | C14orf159                                       | intronic       |
| 13 | 68355397  | A | C | rs78145336                                     | 5.85E-01 | 0.052 | 0.060 | 0.85 | 0.59 | -1.23 | 1.79E-06 | 0.068 | 0.038 | 1.85 | 1.26 | -2.7  | 1.31 | 1.15E-01 | LINC00364(dist=401271), LINC00550(dist=1080020) | intergenic     |
| 8  | 62456335  | C | T | rs34344679                                     | 1.56E-01 | 0.323 | 0.277 | 1.24 | 1.04 | -1.48 | 2.28E-05 | 0.249 | 0.356 | 0.60 | 0.48 | -0.74 | 0.89 | 1.16E-01 | ASPH                                            | intronic       |
| 4  | 154696829 | T | C | rs57861602                                     | 1.82E-01 | 0.035 | 0.047 | 0.72 | 0.47 | -1.12 | 3.10E-05 | 0.085 | 0.048 | 1.84 | 1.31 | -2.6  | 1.32 | 1.16E-01 | RNF175(dist=15442), SFRP2(dist=4913)            | intergenic     |
| 13 | 43820007  | A | G | rs7338937                                      | 4.41E-01 | 0.105 | 0.119 | 1.15 | 0.88 | -1.49 | 5.11E-05 | 0.135 | 0.087 | 0.61 | 0.46 | -0.8  | 0.83 | 1.17E-01 | ENOX1                                           | intronic       |
| 20 | 8213008   | A | G | rs73607857                                     | 1.05E-01 | 0.186 | 0.169 | 1.12 | 0.91 | -1.39 | 2.09E-05 | 0.093 | 0.152 | 0.57 | 0.41 | -0.78 | 0.86 | 1.17E-01 | PLCB1                                           | intronic       |
| 13 | 105496704 | T | A | rs79451999                                     | 2.33E-01 | 0.026 | 0.034 | 0.76 | 0.46 | -1.25 | 1.14E-06 | 0.052 | 0.027 | 1.98 | 1.28 | -3.06 | 1.50 | 1.18E-01 | LINC01309(dist=1416669), DAOA-AS1(dist=614702)  | intergenic     |
| 9  | 112589265 | A | T | rs116065410                                    | 2.43E-01 | 0.018 | 0.025 | 0.69 | 0.38 | -1.26 | 4.27E-05 | 0.054 | 0.026 | 2.09 | 1.36 | -3.21 | 1.44 | 1.18E-01 | PALM2, PALM2-AKAP2                              | intronic       |
| 13 | 68357206  | G | A | rs74531278                                     | 5.70E-01 | 0.051 | 0.060 | 0.85 | 0.59 | -1.22 | 1.73E-06 | 0.068 | 0.038 | 1.85 | 1.26 | -2.7  | 1.31 | 1.18E-01 | LINC00364(dist=403080), LINC00550(dist=1078211) | intergenic     |
| 11 | 83549094  | T | C | rs59848766                                     | 1.23E-01 | 0.153 | 0.176 | 0.84 | 0.67 | -1.06 | 5.27E-05 | 0.245 | 0.184 | 1.44 | 1.15 | -1.79 | 1.17 | 1.18E-01 | DLG2                                            | intronic       |
| 5  | 18283771  | C | T | rs147720599                                    | 1.01E-01 | 0.033 | 0.048 | 0.68 | 0.44 | -1.06 | 3.66E-06 | 0.071 | 0.033 | 2.22 | 1.53 | -3.24 | 1.31 | 1.19E-01 | LOC401177(dist=896352), CDH18(dist=1189384)     | intergenic     |
| 2  | 222002608 | G | T | rs75087229                                     | 4.52E-01 | 0.078 | 0.089 | 0.87 | 0.64 | -1.17 | 6.26E-05 | 0.084 | 0.049 | 1.79 | 1.27 | -2.53 | 1.27 | 1.20E-01 | MIR4268(dist=1231322), EPHA4(dist=280139)       | intergenic     |
| 11 | 110306326 | C | T | rs79237613                                     | 4.62E-01 | 0.074 | 0.088 | 0.83 | 0.61 | -1.12 | 1.49E-05 | 0.089 | 0.052 | 1.80 | 1.29 | -2.52 | 1.24 | 1.21E-01 | FDX1                                            | intronic       |
| 11 | 110297436 | G | A | rs78540503                                     | 4.68E-01 | 0.069 | 0.082 | 0.83 | 0.6  | -1.14 | 1.73E-05 | 0.085 | 0.049 | 1.82 | 1.29 | -2.56 | 1.25 | 1.22E-01 | RDX(dist=129999), FDX1(dist=3225)               | intergenic     |
| 20 | 46034516  | A | G | rs116469114                                    | 2.56E-01 | 0.029 | 0.040 | 0.73 | 0.46 | -1.18 | 3.63E-05 | 0.067 | 0.037 | 1.87 | 1.27 | -2.74 | 1.35 | 1.22E-01 | ZMYND8(dist=48883), NCOA3(dist=96085)           | intergenic     |
| 3  | 73468674  | A | G | rs57982910                                     | 3.03E-01 | 0.048 | 0.059 | 0.81 | 0.55 | -1.17 | 2.27E-05 | 0.072 | 0.037 | 2.03 | 1.4  | -2.95 | 1.31 | 1.23E-01 | PDZRN3                                          | intronic       |
| 2  | 218900295 | G | C | rs934043                                       | 1.20E-01 | 0.036 | 0.029 | 1.26 | 0.8  | -1.96 | 4.56E-06 | 0.049 | 0.026 | 1.90 | 1.22 | -2.96 | 1.71 | 1.23E-01 | NONE(dist=NONE), NONE(dist=NONE)                | intergenic     |
| 11 | 110322915 | C | T | rs77551978                                     | 3.15E-01 | 0.060 | 0.076 | 0.78 | 0.56 | -1.1  | 2.86E-05 | 0.091 | 0.051 | 1.86 | 1.33 | -2.59 | 1.25 | 1.23E-01 | FDX1                                            | intronic       |
| 3  | 147173578 | A | T | rs149413945                                    | 1.23E-01 | 0.016 | 0.026 | 0.62 | 0.33 | -1.15 | 4.64E-06 | 0.043 | 0.022 | 1.96 | 1.22 | -3.15 | 1.58 | 1.24E-01 | LOC440982                                       | ncRNA_intronic |
| 11 | 110268950 | C | A | rs76552671                                     | 3.99E-01 | 0.072 | 0.086 | 0.82 | 0.6  | -1.12 | 1.20E-05 | 0.092 | 0.053 | 1.81 | 1.3  | -2.51 | 1.24 | 1.24E-01 | RDX(dist=101513), FDX1(dist=31711)              | intergenic     |
| 5  | 18254813  | G | A | rs145534542                                    | 6.30E-02 | 0.027 | 0.043 | 0.61 | 0.38 | -1    | 2.13E-06 | 0.069 | 0.031 | 2.34 | 1.6  | -3.43 | 1.31 | 1.24E-01 | LOC401177(dist=867394), CDH18(dist=1218342)     | intergenic     |
| 11 | 110264423 | C | T | rs56284961                                     | 4.02E-01 | 0.072 | 0.086 | 0.82 | 0.6  | -1.12 | 1.42E-05 | 0.092 | 0.053 | 1.80 | 1.29 | -2.5  | 1.24 | 1.24E-01 | RDX(dist=96986), FDX1(dist=36238)               | intergenic     |
| 11 | 21489145  | A | G | rs184608495                                    | 2.84E-01 | 0.037 | 0.047 | 0.78 | 0.51 | -1.19 | 1.25E-05 | 0.060 | 0.030 | 2.04 | 1.36 | -3.07 | 1.36 | 1.24E-01 | NELL1                                           | intronic       |
| 11 | 110310390 | C | T | rs77755553                                     | 4.49E-01 | 0.073 | 0.088 | 0.82 | 0.61 | -1.12 | 1.50E-05 | 0.089 | 0.052 | 1.80 | 1.29 | -2.52 | 1.24 | 1.26E-01 | FDX1                                            | intronic       |
| 18 | 56925027  | G | C | rs1239968                                      | 2.67E-01 | 0.065 | 0.074 | 1.13 | 0.82 | -1.57 | 5.73E-05 | 0.148 | 0.109 | 0.71 | 0.54 | -0.92 | 0.81 | 1.28E-01 | GRP(dist=27025), RAX(dist=9240)                 | intergenic     |
| 5  | 18280989  | C | T | rs142443962                                    | 9.17E-02 | 0.032 | 0.048 | 0.67 | 0.43 | -1.05 | 3.20E-06 | 0.071 | 0.033 | 2.23 | 1.53 | -3.26 | 1.30 | 1.28E-01 | LOC401177(dist=893570), CDH18(dist=1192186)     | intergenic     |
| 11 | 110312753 | A | G | rs77134801                                     | 4.41E-01 | 0.073 | 0.088 | 0.82 | 0.6  | -1.12 | 1.50E-05 | 0.089 | 0.052 | 1.80 | 1.29 | -2.52 | 1.24 | 1.29E-01 | FDX1                                            | intronic       |
| 13 | 50573050  | A | G | rs141926024                                    | 2.80E-01 | 0.019 | 0.027 | 0.72 | 0.4  | -1.28 | 6.44E-05 | 0.050 | 0.023 | 2.23 | 1.43 | -3.49 | 1.39 | 1.30E-01 | DLEU2                                           | ncRNA_intronic |
| 11 | 110308551 | G | A | rs74972072                                     | 4.50E-01 | 0.074 | 0.088 | 0.83 | 0.61 | -1.12 | 2.71E-05 | 0.092 | 0.054 | 1.77 | 1.27 | -2.47 | 1.24 | 1.30E-01 | FDX1                                            | intronic       |
| 4  | 146608233 | G | A | rs114863293                                    | 1.48E-01 | 0.086 | 0.107 | 0.78 | 0.59 | -1.04 | 1.91E-05 | 0.141 | 0.087 | 1.72 | 1.31 | -2.27 | 1.19 | 1.31E-01 | C4orf51                                         | intronic       |
| 1  | 224543316 | C | T | rs114593739                                    | 6.07E-01 | 0.040 | 0.045 | 0.90 | 0.59 | -1.35 | 4.11E-05 | 0.051 | 0.028 | 1.87 | 1.21 | -2.89 | 1.36 | 1.31E-01 | NVL(dist=25425), CNIH4(dist=1197)               | intergenic     |
| 10 | 70617417  | C | G | rs78732656                                     | 3.14E-01 | 0.022 | 0.028 | 0.79 | 0.46 | -1.37 | 4.20E-05 | 0.055 | 0.034 | 1.67 | 1.1  | -2.54 | 1.45 | 1.32E-01 | STOX1                                           | intronic       |
| 5  | 18252058  | C | T | rs141794616                                    | 6.27E-02 | 0.027 | 0.044 | 0.62 | 0.38 | -1    | 2.07E-06 | 0.068 | 0.030 | 2.34 | 1.59 | -3.45 | 1.31 | 1.33E-01 | LOC401177(dist=864639), CDH18(dist=1221097)     | intergenic     |
| 10 | 134957873 | C | T | rs11591506                                     | 2.25E-01 | 0.039 | 0.043 | 0.89 | 0.59 | -1.35 | 4.18E-05 | 0.072 | 0.050 | 1.47 | 1.02 | -2.12 | 1.42 | 1.34E-01 | ADGRA1(dist=12694), KNDC1(dist=16098)           | intergenic     |
| 11 | 17267614  | C | T | rs11608222                                     | 1.31E-01 | 0.046 | 0.057 | 0.79 | 0.54 | -1.16 | 3.95E-05 | 0.117 | 0.078 | 1.56 | 1.16 | -2.09 | 1.23 | 1.34E-01 | PIK3C2A(dist=76260), NUCB2(dist=30672)          | intergenic     |
| 8  | 31322838  | A | G | rs13253087;rs369937911;rs376177396;rs377433365 | 1.42E-01 | 0.041 | 0.045 | 0.91 | 0.61 | -1.36 | 1.41E-05 | 0.085 | 0.054 | 1.63 | 1.16 | -2.29 | 1.32 | 1.35E-01 | WRN(dist=291561), NRG1(dist=174430)             | intergenic     |
| 5  | 33280416  | G | A | rs79198252                                     | 1.27E-01 | 0.032 | 0.040 | 0.79 | 0.5  | -1.25 | 9.32E-10 | 0.044 | 0.027 | 1.65 | 1.03 | -2.63 | 0.64 | 1.35E-01 | LOC340113(dist=317843), TARS(dist=160386)       | intergenic     |
| 13 | 112676742 | A | G | rs79305651                                     | 2.72E-01 | 0.079 | 0.097 | 0.80 | 0.6  | -1.08 | 3.68E-05 | 0.122 | 0.073 | 1.77 | 1.32 | -2.37 | 1.20 | 1.35E-01 | LINC00403                                       | ncRNA_intronic |
| 1  | 246837031 | A | T | rs6673111                                      | 1.05E-01 | 0.330 | 0.352 | 0.91 | 0.76 | -1.08 | 2.50E-05 | 0.408 | 0.332 | 1.39 | 1.15 | -1.68 | 1.12 | 1.36E-01 | CNST(dist=5147), SCCPDH(dist=50347)             | intergenic     |
| 15 | 83386667  | C | T | rs59669011                                     | 1.45E-01 | 0.189 | 0.218 | 0.84 | 0.68 | -1.03 | 2.97E-05 | 0.277 | 0.200 | 1.53 | 1.24 | -1.89 | 1.13 | 1.36E-01 | LOC338963(dist=3822), ACTG1P17(dist=8083)       | intergenic     |
| 16 | 86123241  | G | C | rs62050091                                     | 1.35E-01 | 0.084 | 0.068 | 1.26 | 0.94 | -1.7  | 4.85E-05 | 0.107 | 0.076 | 1.46 | 1.07 | -1.98 | 1.31 | 1.40E-01 | IRF8(dist=167030), LINC01082(dist=106546)       | intergenic     |
| 11 | 17259560  | C | T | rs61881884                                     | 1.18E-01 | 0.046 | 0.058 | 0.78 | 0.53 | -1.15 | 3.45E-05 | 0.118 | 0.079 | 1.56 | 1.16 | -2.1  | 1.23 | 1.41E-01 | PIK3C2A(dist=68206), NUCB2(dist=38726)          | intergenic     |
| 5  | 18277018  | A | T | rs148833966                                    | 7.58E-02 | 0.031 | 0.047 | 0.65 | 0.41 | -1.03 | 2.34E-06 | 0.071 | 0.033 | 2.25 | 1.55 | -3.29 | 1.29 | 1.41E-01 | LOC401177(dist=889599), CDH18(dist=1196137)     | intergenic     |
| 11 | 110252886 | G | C | rs75580406                                     | 3.04E-01 | 0.057 | 0.071 | 0.79 | 0.56 | -1.11 | 2.31E-05 | 0.086 | 0.050 | 1.81 | 1.29 | -2.55 | 1.25 | 1.41E-01 | RDX(dist=85449), FDX1(dist=47775)               | intergenic     |
| 11 | 110257419 | A | C | rs59200836                                     | 3.04E-01 | 0.057 | 0.071 | 0.79 | 0.56 | -1.11 | 2.30E-05 | 0.086 | 0.050 | 1.81 | 1.29 | -2.55 | 1.25 | 1.41E-01 | RDX(dist=89982), FDX1(dist=43242)               | intergenic     |
| 17 | 76309913  | A | G | rs11651583                                     | 1.47E-01 | 0.086 | 0.071 | 0.81 | 0.6  | -1.09 | 8.91E-06 | 0.126 | 0.092 | 0.   |      |       |      |          |                                                 |                |

|    |           |   |   |                                                |          |       |       |      |      |       |          |       |       |      |      |       |      |          |                                                |                |
|----|-----------|---|---|------------------------------------------------|----------|-------|-------|------|------|-------|----------|-------|-------|------|------|-------|------|----------|------------------------------------------------|----------------|
| 15 | 81169361  | T | C | rs8032278                                      | 5.82E-01 | 0.031 | 0.036 | 0.88 | 0.55 | -1.39 | 4.13E-05 | 0.048 | 0.025 | 1.95 | 1.24 | -3.05 | 1.34 | 1.51E-01 | CEMP                                           | intronic       |
| 11 | 110330041 | A | G | rs79988396                                     | 2.26E-01 | 0.056 | 0.074 | 0.75 | 0.53 | -1.06 | 2.53E-05 | 0.092 | 0.051 | 1.87 | 1.34 | -2.6  | 1.23 | 1.52E-01 | FDX1                                           | intronic       |
| 14 | 101645661 | G | A | rs4900489                                      | 1.43E-01 | 0.211 | 0.178 | 1.24 | 1.01 | -1.51 | 4.56E-05 | 0.253 | 0.222 | 1.19 | 0.96 | -1.47 | 1.23 | 1.52E-01 | MEX9(dist=106388), LINC00524(dist=226663)      | intergenic     |
| 17 | 36631971  | T | G | rs145605839                                    | 1.58E-01 | 0.032 | 0.043 | 0.73 | 0.47 | -1.15 | 5.48E-05 | 0.049 | 0.027 | 1.85 | 1.19 | -2.89 | 0.68 | 1.53E-01 | ARHGAP23                                       | intronic       |
| 5  | 18273152  | A | G | rs139705399                                    | 6.49E-02 | 0.030 | 0.046 | 0.63 | 0.4  | -1    | 1.86E-06 | 0.071 | 0.033 | 2.27 | 1.56 | -3.31 | 1.28 | 1.53E-01 | LOC401177(dist=885733), CDH18(dist=1200003)    | intergenic     |
| 8  | 5233240   | A | G | rs75214314                                     | 1.38E-01 | 0.020 | 0.031 | 0.64 | 0.37 | -1.13 | 3.90E-05 | 0.062 | 0.028 | 2.29 | 1.53 | -3.42 | 1.32 | 1.53E-01 | CSMD1(dist=380912), LOC100287015(dist=1027837) | intergenic     |
| 7  | 43208938  | G | C | rs149524932                                    | 3.58E-01 | 0.029 | 0.037 | 0.76 | 0.47 | -1.23 | 3.01E-05 | 0.058 | 0.031 | 1.91 | 1.26 | -2.87 | 1.34 | 1.54E-01 | HECW1                                          | intronic       |
| 11 | 17268259  | C | A | rs149364099                                    | 1.23E-01 | 0.045 | 0.057 | 0.79 | 0.54 | -1.16 | 4.42E-05 | 0.115 | 0.078 | 1.54 | 1.15 | -2.08 | 1.22 | 1.54E-01 | PIK3C2A(dist=76905), NUCB2(dist=30027)         | intergenic     |
| 6  | 46144623  | G | A | rs148651166                                    | 1.36E-01 | 0.017 | 0.026 | 0.65 | 0.35 | -1.18 | 1.20E-05 | 0.037 | 0.023 | 1.66 | 1    | -2.74 | 0.60 | 1.55E-01 | ENPP5(dist=5876), RCAN2(dist=43844)            | intergenic     |
| 10 | 112866769 | G | T | rs74877576                                     | 1.87E-01 | 0.042 | 0.053 | 0.78 | 0.52 | -1.16 | 3.03E-05 | 0.080 | 0.048 | 1.73 | 1.21 | -2.45 | 1.27 | 1.56E-01 | ADRA2A(dist=26107), GPAM(dist=1042853)         | intergenic     |
| 5  | 83023344  | G | A | rs147373601                                    | 3.51E-01 | 0.019 | 0.026 | 0.73 | 0.41 | -1.31 | 5.46E-05 | 0.043 | 0.023 | 1.91 | 1.19 | -3.06 | 1.42 | 1.57E-01 | HAPLN1(dist=6448), EDIL3(dist=213070)          | intergenic     |
| 13 | 78878024  | T | A | rs79617112                                     | 1.55E-01 | 0.017 | 0.027 | 0.64 | 0.35 | -1.18 | 2.09E-06 | 0.039 | 0.023 | 1.75 | 1.07 | -2.86 | 0.67 | 1.59E-01 | RNF219-AS1                                     | ncRNA_intronic |
| 13 | 78878767  | G | A | rs74566709                                     | 1.56E-01 | 0.017 | 0.027 | 0.64 | 0.35 | -1.18 | 2.18E-06 | 0.039 | 0.023 | 1.74 | 1.06 | -2.86 | 0.67 | 1.59E-01 | RNF219-AS1                                     | ncRNA_intronic |
| 15 | 81198527  | C | T | rs115817077                                    | 3.87E-01 | 0.041 | 0.048 | 0.85 | 0.56 | -1.27 | 3.32E-06 | 0.055 | 0.029 | 1.94 | 1.27 | -2.95 | 1.33 | 1.61E-01 | CEMP                                           | intronic       |
| 17 | 72959176  | G | C | rs60549366                                     | 1.66E-01 | 0.024 | 0.034 | 0.69 | 0.41 | -1.16 | 3.96E-05 | 0.032 | 0.020 | 1.59 | 0.92 | -2.75 | 0.68 | 1.61E-01 | HID1                                           | exonic         |
| 9  | 137956827 | T | G | rs60478178                                     | 2.69E-01 | 0.059 | 0.072 | 0.80 | 0.57 | -1.13 | 4.32E-09 | 0.085 | 0.047 | 1.86 | 1.32 | -2.63 | 1.25 | 1.63E-01 | FCN1(dist=147021), OLFM1(dist=10262)           | intergenic     |
| 3  | 27831914  | T | C | rs60579266                                     | 1.81E-01 | 0.058 | 0.064 | 0.90 | 0.64 | -1.28 | 1.96E-05 | 0.105 | 0.071 | 1.52 | 1.12 | -2.08 | 1.24 | 1.66E-01 | EOMES(dist=67708), CMC1(dist=451210)           | intergenic     |
| 15 | 95901290  | G | T | rs116126739                                    | 1.15E-01 | 0.041 | 0.054 | 0.74 | 0.49 | -1.1  | 6.38E-06 | 0.077 | 0.036 | 2.20 | 1.53 | -3.16 | 1.25 | 1.66E-01 | LINC01197(dist=30961), LINC00924(dist=75032)   | intergenic     |
| 2  | 222793775 | C | T | rs115789277                                    | 2.07E-01 | 0.028 | 0.040 | 0.70 | 0.44 | -1.14 | 9.64E-07 | 0.053 | 0.023 | 2.38 | 1.54 | -3.67 | 1.32 | 1.67E-01 | EPHA4(dist=354853), PAX3(dist=270831)          | intergenic     |
| 2  | 222798082 | C | T | rs78153668                                     | 2.10E-01 | 0.028 | 0.040 | 0.70 | 0.44 | -1.14 | 1.09E-06 | 0.053 | 0.023 | 2.38 | 1.54 | -3.67 | 1.32 | 1.67E-01 | EPHA4(dist=359160), PAX3(dist=266524)          | intergenic     |
| 9  | 137954129 | G | A | rs73664032                                     | 2.62E-01 | 0.059 | 0.072 | 0.80 | 0.57 | -1.12 | 4.36E-09 | 0.085 | 0.048 | 1.87 | 1.32 | -2.63 | 1.25 | 1.68E-01 | FCN1(dist=144323), OLFM1(dist=12960)           | intergenic     |
| 9  | 137952970 | A | C | rs73664029                                     | 2.61E-01 | 0.059 | 0.072 | 0.80 | 0.57 | -1.12 | 4.32E-09 | 0.085 | 0.048 | 1.87 | 1.32 | -2.63 | 1.25 | 1.68E-01 | FCN1(dist=143164), OLFM1(dist=14119)           | intergenic     |
| 17 | 74735743  | G | A | rs182982293                                    | 1.74E-01 | 0.016 | 0.021 | 0.76 | 0.4  | -1.43 | 7.61E-06 | 0.033 | 0.020 | 1.67 | 0.98 | -2.84 | 0.57 | 1.68E-01 | MFRD11                                         | intronic       |
| 4  | 186968138 | A | G | rs11735786                                     | 8.36E-02 | 0.374 | 0.392 | 1.08 | 0.91 | -1.27 | 1.93E-05 | 0.495 | 0.432 | 0.77 | 0.64 | -0.93 | 0.89 | 1.69E-01 | SORBS2(dist=90268), TLR3(dist=22171)           | intergenic     |
| 3  | 73452201  | T | C | rs191040043                                    | 1.48E-01 | 0.034 | 0.048 | 0.70 | 0.46 | -1.09 | 2.86E-05 | 0.069 | 0.034 | 2.09 | 1.43 | -3.06 | 1.28 | 1.69E-01 | PDZRN3                                         | intronic       |
| 6  | 142988311 | A | G | rs73780104                                     | 3.22E-01 | 0.033 | 0.040 | 0.80 | 0.51 | -1.26 | 3.50E-07 | 0.046 | 0.022 | 2.16 | 1.36 | -3.42 | 1.38 | 1.70E-01 | LOC153910(dist=29285), HIVEP2(dist=84293)      | intergenic     |
| 11 | 110270304 | C | T | rs55772473                                     | 2.86E-01 | 0.060 | 0.075 | 0.79 | 0.56 | -1.1  | 1.94E-05 | 0.085 | 0.048 | 1.82 | 1.29 | -2.57 | 1.23 | 1.71E-01 | RDx(dist=102867), FDx1(dist=30357)             | intergenic     |
| 1  | 153185825 | G | A | rs139701368                                    | 9.09E-02 | 0.016 | 0.027 | 0.58 | 0.31 | -1.08 | 2.95E-05 | 0.051 | 0.023 | 2.25 | 1.45 | -3.5  | 1.36 | 1.73E-01 | LELP1(dist=8224), PRR9(dist=4235)              | intergenic     |
| 15 | 95898339  | T | C | rs78417504                                     | 1.14E-01 | 0.041 | 0.055 | 0.74 | 0.49 | -1.1  | 7.66E-06 | 0.077 | 0.037 | 2.19 | 1.52 | -3.14 | 1.24 | 1.74E-01 | LINC01197(dist=28010), LINC00924(dist=77983)   | intergenic     |
| 10 | 14831155  | A | G | rs76588015                                     | 1.45E-01 | 0.018 | 0.026 | 0.68 | 0.37 | -1.24 | 3.71E-05 | 0.031 | 0.020 | 1.56 | 0.9  | -2.7  | 0.63 | 1.75E-01 | FAM107B(dist=14259), CDFNF(dist=30096)         | intergenic     |
| 1  | 4749103   | G | A | rs4092258                                      | 3.85E-01 | 0.050 | 0.056 | 0.89 | 0.61 | -1.29 | 4.73E-05 | 0.081 | 0.054 | 1.56 | 1.1  | -2.21 | 1.26 | 1.75E-01 | AJAP1                                          | intronic       |
| 18 | 57332849  | A | G | rs138119028                                    | 5.00E-01 | 0.022 | 0.027 | 0.82 | 0.47 | -1.41 | 4.96E-05 | 0.041 | 0.021 | 1.97 | 1.21 | -3.21 | 1.38 | 1.76E-01 | CCBE1                                          | intronic       |
| 3  | 152319326 | T | C | rs60455236                                     | 3.26E-01 | 0.040 | 0.051 | 0.79 | 0.52 | -1.18 | 4.72E-05 | 0.061 | 0.034 | 1.86 | 1.24 | -2.77 | 1.31 | 1.78E-01 | MBNL1(dist=135757), P2RY1(dist=233410)         | intergenic     |
| 14 | 91707912  | A | C | rs74086323                                     | 2.22E-01 | 0.045 | 0.059 | 0.76 | 0.52 | -1.11 | 2.39E-05 | 0.077 | 0.041 | 1.94 | 1.35 | -2.78 | 1.24 | 1.78E-01 | GPR68                                          | intronic       |
| 15 | 82411217  | T | A | rs55681845                                     | 1.62E-01 | 0.037 | 0.042 | 0.85 | 0.72 | -1.02 | 5.85E-05 | 0.368 | 0.283 | 1.48 | 1.21 | -1.79 | 1.10 | 1.79E-01 | LINC01583(dist=21183), EFTUD1(dist=11344)      | intergenic     |
| 5  | 18276310  | A | G | rs139789530                                    | 3.83E-02 | 0.026 | 0.043 | 0.59 | 0.36 | -0.96 | 2.56E-06 | 0.069 | 0.031 | 2.31 | 1.57 | -3.38 | 1.27 | 1.79E-01 | LOC401177(dist=888891), CDH18(dist=1196845)    | intergenic     |
| 8  | 139201229 | C | T | rs34355116;rs186496690;rs386730628;rs386730629 | 1.76E-01 | 0.123 | 0.146 | 0.82 | 0.64 | -1.05 | 9.09E-06 | 0.174 | 0.112 | 1.67 | 1.3  | -2.15 | 1.15 | 1.79E-01 | FAM135B                                        | intronic       |
| 13 | 78862527  | A | C | rs76219190                                     | 1.76E-01 | 0.017 | 0.026 | 0.65 | 0.35 | -1.2  | 2.16E-06 | 0.039 | 0.023 | 1.74 | 1.06 | -2.85 | 0.68 | 1.79E-01 | RNF219-AS1                                     | ncRNA_intronic |
| 13 | 78861066  | T | C | rs78222133                                     | 1.76E-01 | 0.017 | 0.026 | 0.65 | 0.35 | -1.19 | 2.17E-06 | 0.039 | 0.023 | 1.74 | 1.06 | -2.85 | 0.68 | 1.80E-01 | RNF219-AS1                                     | ncRNA_intronic |
| 13 | 78872166  | T | C | rs76054032                                     | 1.77E-01 | 0.017 | 0.026 | 0.65 | 0.35 | -1.2  | 2.24E-06 | 0.039 | 0.023 | 1.74 | 1.06 | -2.85 | 0.68 | 1.80E-01 | RNF219-AS1                                     | ncRNA_intronic |
| 13 | 78873440  | G | A | rs76711188                                     | 1.77E-01 | 0.017 | 0.026 | 0.65 | 0.35 | -1.2  | 2.22E-06 | 0.039 | 0.023 | 1.74 | 1.06 | -2.85 | 0.68 | 1.81E-01 | RNF219-AS1                                     | ncRNA_intronic |
| 13 | 78873846  | G | T | rs77618544                                     | 1.78E-01 | 0.017 | 0.026 | 0.65 | 0.35 | -1.2  | 2.22E-06 | 0.039 | 0.023 | 1.74 | 1.06 | -2.85 | 0.68 | 1.81E-01 | RNF219-AS1                                     | ncRNA_intronic |
| 13 | 78846263  | G | A | rs79854491                                     | 1.79E-01 | 0.016 | 0.025 | 0.64 | 0.34 | -1.2  | 2.92E-06 | 0.039 | 0.023 | 1.73 | 1.06 | -2.84 | 0.68 | 1.82E-01 | RNF219-AS1                                     | ncRNA_intronic |
| 13 | 78835361  | T | C | rs80187665                                     | 1.80E-01 | 0.016 | 0.025 | 0.64 | 0.34 | -1.2  | 2.53E-06 | 0.039 | 0.023 | 1.74 | 1.06 | -2.85 | 0.68 | 1.83E-01 | RNF219-AS1                                     | ncRNA_intronic |
| 13 | 78837277  | T | A | rs78474623                                     | 1.80E-01 | 0.016 | 0.025 | 0.64 | 0.34 | -1.2  | 2.54E-06 | 0.039 | 0.023 | 1.74 | 1.06 | -2.85 | 0.68 | 1.83E-01 | RNF219-AS1                                     | ncRNA_intronic |
| 10 | 91289848  | A | C | rs77728872                                     | 9.19E-02 | 0.031 | 0.044 | 0.68 | 0.43 | -1.08 | 5.27E-05 | 0.074 | 0.040 | 1.94 | 1.34 | -2.8  | 1.28 | 1.84E-01 | SLC16A12                                       | intronic       |
| 13 | 78833053  | T | C | rs115696291                                    | 1.82E-01 | 0.016 | 0.024 | 0.64 | 0.34 | -1.21 | 1.61E-06 | 0.039 | 0.023 | 1.74 | 1.06 | -2.85 | 0.67 | 1.85E-01 | RNF219-AS1                                     | ncRNA_intronic |
| 13 | 78832827  | C | T | rs77583205                                     | 1.82E-01 | 0.016 | 0.024 | 0.64 | 0.34 | -1.21 | 1.57E-06 | 0.039 | 0.023 | 1.74 | 1.06 | -2.85 | 0.67 | 1.86E-01 | RNF219-AS1                                     | ncRNA_intronic |
| 7  | 114623984 | C | T | rs78351730                                     | 2.81E-01 | 0.014 | 0.021 | 0.68 | 0.35 | -1.33 | 2.56E-05 | 0.040 | 0.021 | 1.93 | 1.18 | -3.16 | 1.48 | 1.88E-01 | MDFIC                                          | intronic       |
| 5  | 18274248  | A | G | rs141362926                                    | 3.41E-02 | 0.025 | 0.043 | 0.57 | 0.35 | -0.95 | 2.24E-06 | 0.069 | 0.031 | 2.32 | 1.58 | -3.4  | 1.27 | 1.89E-01 | LOC401177(dist=886829), CDH18(dist=1198907)    | intergenic     |
| 10 | 42729420  | C | T | rs12098665                                     | 1.80E-01 | 0.063 | 0.055 | 1.16 | 0.82 | -1.62 | 4.21E-05 | 0.054 | 0.033 | 1.69 | 1.11 | -2.58 | 1.37 | 1.90E-01 | NONE(dist=NONE), LOC441666(dist=97894)         | intergenic     |
| 2  | 8741693   | G | A | rs143340884                                    | 1.88E-01 | 0.021 | 0.025 | 0.83 | 0.47 | -1.45 | 1.64E-05 | 0.057 | 0.036 | 1.61 | 1.07 | -2.42 | 0.64 | 1.91E-01 | LOC101929567(dist=17771), ID2-AS1(dist=69421)  | intergenic     |
| 6  | 74152110  | C | T | rs80323534                                     | 1.75E-01 | 0.057 | 0.070 | 0.82 | 0.58 | -1.15 | 2.73E-05 | 0.094 | 0.057 | 1.73 | 1.25 | -2.4  | 1.24 | 1.94E-01 | MB21D1                                         | intronic       |
| 8  | 62448878  | G | A | rs10106775                                     | 8.31E-02 | 0.316 | 0.266 | 1.27 | 1.07 | -1.52 | 3.62E-05 | 0.243 | 0.345 | 0.61 | 0.49 | -0.76 | 0.91 | 1.95E-01 | ASPH                                           | intronic       |
| 3  | 116649091 | C | T | rs60708676                                     | 7.57E-02 | 0.026 | 0.042 | 0.62 | 0.38 | -1.01 | 1.15E-06 | 0.062 | 0.026 | 2.44 | 1.63 | -3.66 | 1.28 | 1.96E-01 | LINC00901                                      | ncRNA_intronic |
| 8  | 5221345   | G | A | rs115300597                                    | 1.76E-01 | 0.028 | 0.038 | 0.72 | 0.45 | -1.17 | 4.69E-05 | 0.060 | 0.028 | 2.23 | 1.48 | -3.35 | 1.28 | 1.96E-01 | CSMD1(dist=36907), LOC100287015(dist=1039732)  | intergenic     |
| 5  | 169366581 | C | T | rs259908                                       | 6.46E-02 | 0.019 | 0.030 | 0.62 | 0.35 | -1.11 | 2.71E-06 | 0.050 | 0.023 |      |      |       |      |          |                                                |                |

|    |           |   |   |                                     |          |       |       |      |      |       |          |       |       |      |      |       |      |          |                                                |                |
|----|-----------|---|---|-------------------------------------|----------|-------|-------|------|------|-------|----------|-------|-------|------|------|-------|------|----------|------------------------------------------------|----------------|
| 13 | 78943028  | C | T | rs117152880                         | 2.07E-01 | 0.015 | 0.023 | 0.67 | 0.35 | -1.27 | 1.51E-05 | 0.037 | 0.021 | 1.74 | 1.05 | -2.9  | 0.67 | 2.11E-01 | RNF219-AS1                                     | ncRNA_intronic |
| 13 | 78942393  | G | A | rs77452499                          | 2.07E-01 | 0.015 | 0.023 | 0.67 | 0.35 | -1.27 | 1.49E-05 | 0.037 | 0.021 | 1.74 | 1.05 | -2.9  | 0.67 | 2.11E-01 | RNF219-AS1                                     | ncRNA_intronic |
| 13 | 78943318  | G | A | rs75119373                          | 2.07E-01 | 0.015 | 0.023 | 0.67 | 0.35 | -1.27 | 1.51E-05 | 0.037 | 0.021 | 1.74 | 1.05 | -2.9  | 0.67 | 2.11E-01 | RNF219-AS1                                     | ncRNA_intronic |
| 13 | 50109085  | G | A | rs151311812                         | 1.46E-01 | 0.024 | 0.034 | 0.69 | 0.41 | -1.16 | 1.83E-05 | 0.053 | 0.025 | 2.18 | 1.41 | -3.35 | 1.30 | 2.11E-01 | RCBTB1                                         | intronic       |
| 8  | 139201230 | T | G | rs386730628;rs386730629;rs189692621 | 1.44E-01 | 0.111 | 0.134 | 0.81 | 0.63 | -1.05 | 4.84E-06 | 0.159 | 0.102 | 1.66 | 1.28 | -2.15 | 1.16 | 2.13E-01 | FAM135B                                        | intronic       |
| 7  | 11626296  | C | T | rs17168481                          | 2.10E-01 | 0.045 | 0.057 | 0.78 | 0.53 | -1.14 | 6.71E-06 | 0.074 | 0.040 | 1.93 | 1.34 | -2.79 | 1.23 | 2.14E-01 | THSD7A                                         | intronic       |
| 2  | 222800425 | C | T | rs182974748                         | 2.15E-01 | 0.027 | 0.038 | 0.70 | 0.43 | -1.15 | 5.65E-06 | 0.049 | 0.022 | 2.31 | 1.47 | -3.63 | 1.30 | 2.15E-01 | EPHA4(dist=361503), PAX3(dist=264181)          | intergenic     |
| 7  | 114623006 | C | T | rs76584855                          | 2.67E-01 | 0.014 | 0.020 | 0.67 | 0.34 | -1.32 | 3.33E-05 | 0.039 | 0.020 | 1.94 | 1.18 | -3.2  | 1.44 | 2.16E-01 | MDFC                                           | intronic       |
| 9  | 137948394 | G | A | rs77449344                          | 3.33E-01 | 0.036 | 0.045 | 0.78 | 0.51 | -1.21 | 1.67E-05 | 0.058 | 0.031 | 1.93 | 1.28 | -2.91 | 1.26 | 2.16E-01 | FCN1(dist=138588), OLFM1(dist=18695)           | intergenic     |
| 8  | 62442962  | C | T | rs4416815                           | 8.89E-02 | 0.318 | 0.266 | 1.28 | 1.07 | -1.53 | 6.03E-05 | 0.253 | 0.353 | 0.62 | 0.5  | -0.77 | 0.91 | 2.18E-01 | ASPH                                           | intronic       |
| 9  | 135297925 | G | C | rs944615                            | 2.15E-01 | 0.064 | 0.079 | 0.80 | 0.58 | -1.11 | 3.44E-05 | 0.077 | 0.052 | 1.50 | 1.05 | -2.14 | 0.77 | 2.20E-01 | C9orf171                                       | intronic       |
| 13 | 78822358  | A | G | rs76763033                          | 2.18E-01 | 0.016 | 0.023 | 0.67 | 0.35 | -1.26 | 8.57E-07 | 0.039 | 0.023 | 1.73 | 1.05 | -2.84 | 0.69 | 2.22E-01 | RNF219-AS1                                     | ncRNA_intronic |
| 14 | 91693336  | G | C | rs57997585                          | 1.82E-01 | 0.028 | 0.038 | 0.74 | 0.46 | -1.19 | 3.93E-05 | 0.061 | 0.034 | 1.81 | 1.21 | -2.71 | 1.29 | 2.22E-01 | C14orf159(dist=1596), GPR68(dist=5540)         | intergenic     |
| 14 | 91693335  | G | T | rs61286301                          | 1.82E-01 | 0.028 | 0.038 | 0.74 | 0.46 | -1.19 | 3.93E-05 | 0.061 | 0.034 | 1.81 | 1.21 | -2.71 | 1.29 | 2.22E-01 | C14orf159(dist=1595), GPR68(dist=5541)         | intergenic     |
| 7  | 114621643 | A | T | rs77503901                          | 2.67E-01 | 0.014 | 0.021 | 0.67 | 0.34 | -1.32 | 3.58E-05 | 0.039 | 0.020 | 1.93 | 1.17 | -3.18 | 1.44 | 2.24E-01 | MDFC                                           | intronic       |
| 14 | 99653123  | C | T | rs10484068                          | 2.14E-01 | 0.039 | 0.032 | 1.24 | 0.81 | -1.91 | 3.96E-05 | 0.048 | 0.035 | 1.39 | 0.89 | -2.15 | 1.49 | 2.25E-01 | BCL11B                                         | intronic       |
| 13 | 78935905  | A | C | rs80255344                          | 2.23E-01 | 0.018 | 0.026 | 0.69 | 0.38 | -1.25 | 4.40E-05 | 0.038 | 0.023 | 1.68 | 1.02 | -2.76 | 0.70 | 2.26E-01 | RNF219-AS1                                     | ncRNA_intronic |
| 1  | 15152036  | C | G | rs12137340                          | 2.19E-01 | 0.024 | 0.026 | 0.89 | 0.52 | -1.51 | 7.37E-08 | 0.061 | 0.045 | 1.38 | 0.93 | -2.05 | 0.69 | 2.27E-01 | KAZN                                           | intronic       |
| 7  | 61665437  | T | G | rs148284096                         | 1.77E-01 | 0.053 | 0.066 | 0.79 | 0.55 | -1.12 | 9.27E-06 | 0.085 | 0.051 | 1.74 | 1.23 | -2.45 | 1.24 | 2.27E-01 | NONE(dist=NONE), ZNF733P(dist=1086233)         | intergenic     |
| 17 | 75551688  | G | A | rs77154082                          | 2.34E-01 | 0.023 | 0.028 | 0.80 | 0.47 | -1.37 | 4.96E-06 | 0.064 | 0.045 | 1.45 | 0.98 | -2.13 | 0.71 | 2.28E-01 | LOC100507351                                   | ncRNA_intronic |
| 11 | 131540812 | G | A | rs77019611                          | 2.31E-01 | 0.034 | 0.029 | 1.17 | 0.74 | -1.85 | 1.96E-05 | 0.041 | 0.025 | 1.69 | 1.05 | -2.74 | 1.46 | 2.30E-01 | NTM                                            | intronic       |
| 13 | 47577117  | A | T | rs79106328                          | 8.48E-02 | 0.057 | 0.080 | 0.70 | 0.5  | -0.98 | 4.41E-05 | 0.112 | 0.062 | 1.92 | 1.42 | -2.61 | 1.17 | 2.31E-01 | HTR2A(dist=105906), LINC00562(dist=927171)     | intergenic     |
| 8  | 5232827   | T | C | rs144599766                         | 1.16E-01 | 0.026 | 0.038 | 0.67 | 0.41 | -1.11 | 3.25E-05 | 0.064 | 0.029 | 2.26 | 1.52 | -3.36 | 1.24 | 2.34E-01 | CSMD1(dist=380499), LOC100287015(dist=1028250) | intergenic     |
| 6  | 122448447 | A | T | rs75170456                          | 3.10E-01 | 0.026 | 0.033 | 0.79 | 0.48 | -1.31 | 5.80E-05 | 0.043 | 0.022 | 2.01 | 1.25 | -3.23 | 1.33 | 2.36E-01 | GJA1(dist=677557), HSF2(dist=272249)           | intergenic     |
| 11 | 110363706 | G | T | rs55727616                          | 1.05E-02 | 0.044 | 0.065 | 0.67 | 0.45 | -0.98 | 1.61E-05 | 0.085 | 0.045 | 1.94 | 1.38 | -2.74 | 1.21 | 2.37E-01 | FDX1(dist=28098), ARHGAP20(dist=84053)         | intergenic     |
| 16 | 81770239  | C | T | rs149745730                         | 2.32E-01 | 0.032 | 0.041 | 0.77 | 0.49 | -1.22 | 6.52E-09 | 0.056 | 0.032 | 1.83 | 1.21 | -2.78 | 0.71 | 2.38E-01 | CMIP(dist=24872), PLCG2(dist=42624)            | intergenic     |
| 21 | 42913436  | C | T | rs77512062                          | 2.31E-01 | 0.018 | 0.025 | 0.70 | 0.38 | -1.27 | 1.33E-05 | 0.060 | 0.040 | 1.53 | 1.02 | -2.28 | 0.70 | 2.41E-01 | TMPPRSS2(dist=33351), LINC00111(dist=186026)   | intergenic     |
| 21 | 42912013  | C | T | rs80059191                          | 2.31E-01 | 0.017 | 0.024 | 0.69 | 0.37 | -1.28 | 1.88E-05 | 0.060 | 0.040 | 1.52 | 1.02 | -2.27 | 0.70 | 2.42E-01 | TMPPRSS2(dist=31928), LINC00111(dist=187449)   | intergenic     |
| 21 | 42913957  | C | T | rs75355745                          | 2.32E-01 | 0.018 | 0.025 | 0.70 | 0.38 | -1.27 | 1.47E-05 | 0.060 | 0.040 | 1.53 | 1.02 | -2.28 | 0.70 | 2.43E-01 | TMPPRSS2(dist=33872), LINC00111(dist=185505)   | intergenic     |
| 11 | 17283613  | T | C | rs1979602                           | 3.20E-02 | 0.020 | 0.031 | 0.63 | 0.36 | -1.11 | 3.14E-05 | 0.084 | 0.055 | 1.56 | 1.11 | -2.2  | 1.24 | 2.44E-01 | PIK3C2A(dist=92259), NUCB2(dist=14673)         | intergenic     |
| 18 | 22948405  | G | T | rs139762389                         | 3.38E-01 | 0.027 | 0.032 | 0.81 | 0.49 | -1.34 | 3.45E-05 | 0.042 | 0.022 | 1.94 | 1.2  | -3.14 | 1.32 | 2.46E-01 | ZNF521(dist=16191), SS18(dist=647812)          | intergenic     |
| 11 | 3378263   | G | A | rs74849538                          | 2.48E-01 | 0.037 | 0.030 | 1.21 | 0.78 | -1.89 | 4.60E-06 | 0.034 | 0.021 | 1.66 | 0.98 | -2.81 | 1.38 | 2.47E-01 | ZNF195                                         | downstream     |
| 14 | 105495663 | C | T | rs60187408                          | 6.08E-02 | 0.199 | 0.179 | 1.14 | 0.92 | -1.39 | 3.66E-05 | 0.108 | 0.168 | 0.60 | 0.44 | -0.8  | 0.90 | 2.49E-01 | CDCA4(dist=8238), GPR132(dist=20063)           | intergenic     |
| 16 | 2880199   | C | T | rs113443450                         | 1.57E-01 | 0.036 | 0.050 | 0.72 | 0.47 | -1.1  | 3.85E-07 | 0.058 | 0.029 | 2.09 | 1.39 | -3.16 | 1.25 | 2.51E-01 | ZG16B(NM_145252:c.-50C>T)                      | UTR5           |
| 17 | 75549912  | G | A | rs149198037                         | 2.58E-01 | 0.018 | 0.023 | 0.77 | 0.42 | -1.42 | 1.38E-09 | 0.039 | 0.025 | 1.59 | 0.97 | -2.61 | 0.67 | 2.52E-01 | LOC100507351                                   | ncRNA_intronic |
| 13 | 107486592 | C | A | rs7139820                           | 2.48E-01 | 0.089 | 0.080 | 1.12 | 0.84 | -1.5  | 4.86E-07 | 0.139 | 0.097 | 1.51 | 1.15 | -1.98 | 1.26 | 2.52E-01 | LINC00443(dist=162064), FAM1155A(dist=334287)  | intergenic     |
| 21 | 42909436  | C | T | rs74513277                          | 2.43E-01 | 0.015 | 0.021 | 0.69 | 0.36 | -1.33 | 5.23E-07 | 0.061 | 0.039 | 1.59 | 1.07 | -2.37 | 0.69 | 2.54E-01 | TMPPRSS2(dist=29351), LINC00111(dist=190026)   | intergenic     |
| 9  | 128965939 | G | A | rs77804330                          | 6.92E-02 | 0.011 | 0.021 | 0.51 | 0.24 | -1.09 | 4.69E-05 | 0.045 | 0.021 | 2.19 | 1.37 | -3.48 | 1.35 | 2.55E-01 | PBX3(dist=236284), LOC101929116(dist=66464)    | intergenic     |
| 9  | 127391489 | C | T | rs76566002                          | 2.52E-01 | 0.043 | 0.054 | 0.78 | 0.53 | -1.16 | 3.63E-07 | 0.038 | 0.025 | 1.55 | 0.94 | -2.54 | 0.77 | 2.56E-01 | NR6A1                                          | intronic       |
| 11 | 6358200   | A | T | rs2682117                           | 2.61E-01 | 0.141 | 0.131 | 1.09 | 0.86 | -1.38 | 2.38E-08 | 0.184 | 0.127 | 1.55 | 1.21 | -1.97 | 1.22 | 2.60E-01 | PRKCSBP(dist=16460), SMPD1(dist=53444)         | intergenic     |
| 16 | 81769588  | C | A | rs114433826                         | 2.56E-01 | 0.034 | 0.044 | 0.78 | 0.5  | -1.21 | 1.55E-07 | 0.057 | 0.033 | 1.78 | 1.18 | -2.69 | 0.73 | 2.62E-01 | CMIP(dist=24221), PLCG2(dist=43275)            | intergenic     |
| 12 | 1131155   | C | G | rs115846733                         | 2.65E-01 | 0.033 | 0.028 | 1.16 | 0.73 | -1.85 | 1.76E-08 | 0.042 | 0.025 | 1.70 | 1.06 | -2.75 | 1.47 | 2.63E-01 | ERC1                                           | intronic       |
| 9  | 128960073 | G | A | rs114184642                         | 6.64E-02 | 0.011 | 0.021 | 0.51 | 0.24 | -1.08 | 5.27E-05 | 0.045 | 0.021 | 2.19 | 1.37 | -3.48 | 1.34 | 2.66E-01 | PBX3(dist=230418), LOC101929116(dist=72330)    | intergenic     |
| 19 | 6922231   | G | A | rs11665859                          | 3.01E-02 | 0.220 | 0.185 | 1.25 | 1.02 | -1.52 | 5.87E-05 | 0.128 | 0.204 | 0.57 | 0.43 | -0.76 | 0.91 | 2.69E-01 | ADGRE1                                         | intronic       |
| 11 | 17305854  | C | T | rs72863661                          | 5.65E-02 | 0.057 | 0.073 | 0.78 | 0.55 | -1.09 | 2.58E-05 | 0.137 | 0.098 | 1.46 | 1.11 | -1.93 | 1.15 | 2.71E-01 | NUCB2                                          | intronic       |
| 13 | 78925903  | C | T | rs78058983                          | 2.69E-01 | 0.017 | 0.024 | 0.70 | 0.38 | -1.3  | 1.69E-05 | 0.037 | 0.022 | 1.73 | 1.04 | -2.87 | 0.72 | 2.73E-01 | RNF219-AS1                                     | ncRNA_intronic |
| 13 | 78926490  | T | C | rs75214321                          | 2.69E-01 | 0.017 | 0.024 | 0.70 | 0.38 | -1.3  | 1.67E-05 | 0.037 | 0.022 | 1.73 | 1.04 | -2.87 | 0.72 | 2.73E-01 | RNF219-AS1                                     | ncRNA_intronic |
| 8  | 60267086  | C | T | rs73262046                          | 2.80E-01 | 0.025 | 0.030 | 0.80 | 0.48 | -1.34 | 1.16E-07 | 0.044 | 0.023 | 1.97 | 1.23 | -3.15 | 0.71 | 2.74E-01 | TOX(dist=235319), CA8(dist=834337)             | intergenic     |
| 5  | 83017867  | C | G | rs148389628                         | 2.24E-01 | 0.024 | 0.033 | 0.71 | 0.43 | -1.2  | 3.01E-05 | 0.043 | 0.023 | 1.94 | 1.21 | -3.13 | 1.30 | 2.76E-01 | HAPLN1                                         | upstream       |
| 13 | 78931179  | C | T | rs74547404                          | 2.72E-01 | 0.017 | 0.024 | 0.70 | 0.38 | -1.3  | 1.58E-05 | 0.037 | 0.022 | 1.73 | 1.04 | -2.87 | 0.72 | 2.76E-01 | RNF219-AS1                                     | ncRNA_intronic |
| 13 | 78931445  | C | A | rs79199772                          | 2.72E-01 | 0.017 | 0.024 | 0.71 | 0.38 | -1.3  | 1.59E-05 | 0.037 | 0.022 | 1.73 | 1.04 | -2.87 | 0.72 | 2.76E-01 | RNF219-AS1                                     | ncRNA_intronic |
| 13 | 78932525  | G | T | rs77487726                          | 2.73E-01 | 0.017 | 0.024 | 0.71 | 0.38 | -1.3  | 1.56E-05 | 0.037 | 0.022 | 1.73 | 1.05 | -2.88 | 0.72 | 2.77E-01 | RNF219-AS1                                     | ncRNA_intronic |
| 15 | 22801215  | C | T | rs7497873                           | 2.76E-01 | 0.063 | 0.056 | 1.13 | 0.81 | -1.59 | 1.93E-05 | 0.055 | 0.039 | 1.42 | 0.93 | -2.14 | 1.25 | 2.77E-01 | GOLGA6L1(dist=55213), TUBGCP5(dist=32180)      | intergenic     |
| 13 | 78936893  | A | G | rs116899733                         | 2.74E-01 | 0.017 | 0.024 | 0.71 | 0.38 | -1.3  | 1.55E-05 | 0.037 | 0.022 | 1.73 | 1.05 | -2.88 | 0.72 | 2.78E-01 | RNF219-AS1                                     | ncRNA_intronic |
| 13 | 78937309  | G | T | rs76213407                          | 2.74E-01 | 0.017 | 0.024 | 0.71 | 0.38 | -1.3  | 1.55E-05 | 0.037 | 0.022 | 1.73 | 1.05 | -2.88 | 0.72 | 2.78E-01 | RNF219-AS1                                     | ncRNA_intronic |
| 13 | 78940671  | A | C | rs77482082                          | 2.74E-01 | 0.017 | 0.024 | 0.71 | 0.38 | -1.3  | 1.56E-05 | 0.037 | 0.022 | 1.73 | 1.05 | -2.88 | 0.72 | 2.78E-01 | RNF219-AS1                                     | ncRNA_intronic |
| 6  | 29417198  | C | A | rs114854144                         | 3.22E-02 | 0.044 | 0.066 | 0.65 | 0.44 | -0.95 | 5.45E-05 | 0.110 | 0.061 | 1.91 | 1.4  | -2.59 | 1.16 | 2.       |                                                |                |

|    |           |   |   |                                     |          |       |       |      |      |       |          |       |       |      |      |       |      |          |                                                       |                |
|----|-----------|---|---|-------------------------------------|----------|-------|-------|------|------|-------|----------|-------|-------|------|------|-------|------|----------|-------------------------------------------------------|----------------|
| 11 | 11336576  | A | C | rs75424437                          | 6.04E-02 | 0.018 | 0.030 | 0.60 | 0.33 | -1.08 | 1.36E-06 | 0.051 | 0.027 | 1.96 | 1.26 | -3.04 | 1.30 | 3.11E-01 | GALNT18                                               | intronic       |
| 12 | 96880353  | T | A | rs61940377                          | 3.13E-01 | 0.026 | 0.020 | 1.30 | 0.77 | -2.2  | 2.44E-08 | 0.044 | 0.030 | 1.45 | 0.91 | -2.31 | 1.49 | 3.12E-01 | CDK17(dist=85987), NEDD1(dist=420648)                 | intergenic     |
| 18 | 7818077   | C | G | rs77453554                          | 1.21E-01 | 0.032 | 0.044 | 0.72 | 0.46 | -1.13 | 2.88E-05 | 0.062 | 0.034 | 1.85 | 1.24 | -2.75 | 1.23 | 3.15E-01 | PTPRM                                                 | intronic       |
| 12 | 593710    | G | T | rs115365419                         | 3.17E-01 | 0.022 | 0.029 | 0.76 | 0.44 | -1.3  | 1.26E-05 | 0.043 | 0.023 | 1.90 | 1.18 | -3.05 | 0.71 | 3.15E-01 | B4GALNT3                                              | intronic       |
| 19 | 6922418   | A | C | rs12975999                          | 2.42E-02 | 0.252 | 0.213 | 1.25 | 1.03 | -1.51 | 5.63E-05 | 0.152 | 0.232 | 0.59 | 0.46 | -0.77 | 0.93 | 3.19E-01 | ADGRE1                                                | intronic       |
| 18 | 726687    | A | G | rs144246538                         | 2.71E-01 | 0.031 | 0.042 | 0.73 | 0.46 | -1.16 | 7.46E-06 | 0.045 | 0.021 | 2.16 | 1.35 | -3.44 | 1.22 | 3.19E-01 | YES1                                                  | intronic       |
| 18 | 719684    | A | G | rs79620408                          | 2.64E-01 | 0.030 | 0.041 | 0.72 | 0.45 | -1.15 | 5.65E-06 | 0.044 | 0.021 | 2.18 | 1.36 | -3.49 | 1.23 | 3.20E-01 | ENOSF1(dist=7022), YES1(dist=1908)                    | intergenic     |
| 19 | 56064517  | C | T | rs143928767                         | 3.19E-01 | 0.151 | 0.142 | 1.08 | 0.86 | -1.36 | 9.31E-06 | 0.138 | 0.109 | 1.31 | 1    | -1.73 | 1.15 | 3.21E-01 | SBK3(dist=7608), ZNF579(dist=24374)                   | intergenic     |
| 11 | 110334065 | C | G | rs74785078                          | 9.17E-02 | 0.052 | 0.074 | 0.68 | 0.48 | -0.98 | 5.82E-05 | 0.097 | 0.056 | 1.82 | 1.31 | -2.51 | 1.15 | 3.21E-01 | FDX1(NM_004109;c.*873C>G)                             | UTR3           |
| 18 | 726528    | C | T | rs141917774                         | 2.69E-01 | 0.031 | 0.042 | 0.73 | 0.46 | -1.15 | 7.48E-06 | 0.045 | 0.021 | 2.16 | 1.35 | -3.44 | 1.22 | 3.23E-01 | YES1                                                  | intronic       |
| 2  | 69456417  | T | C | rs77816630                          | 7.83E-02 | 0.021 | 0.026 | 0.83 | 0.47 | -1.44 | 7.96E-07 | 0.051 | 0.034 | 1.52 | 0.99 | -2.34 | 1.30 | 3.24E-01 | ANTXR1                                                | intronic       |
| 13 | 78932059  | G | A | rs75759414                          | 3.21E-01 | 0.018 | 0.024 | 0.74 | 0.41 | -1.34 | 1.95E-05 | 0.037 | 0.022 | 1.72 | 1.04 | -2.86 | 0.74 | 3.25E-01 | RNF219-AS1                                            | ncRNA_intronic |
| 15 | 95941317  | A | G | rs79353435                          | 4.69E-02 | 0.029 | 0.043 | 0.65 | 0.41 | -1.05 | 2.24E-05 | 0.065 | 0.033 | 2.06 | 1.4  | -3.04 | 1.21 | 3.27E-01 | LINC01197(dist=70988), LINC00924(dist=35005)          | intergenic     |
| 3  | 152350774 | G | T | rs7621028                           | 1.30E-01 | 0.027 | 0.041 | 0.66 | 0.41 | -1.08 | 4.95E-06 | 0.050 | 0.023 | 2.26 | 1.45 | -3.53 | 1.22 | 3.27E-01 | MBNL1(dist=167205), P2RY11(dist=201962)               | intergenic     |
| 18 | 718799    | A | G | rs73943167                          | 2.47E-01 | 0.029 | 0.040 | 0.71 | 0.44 | -1.14 | 5.32E-06 | 0.044 | 0.021 | 2.17 | 1.36 | -3.49 | 1.23 | 3.28E-01 | ENOSF1(dist=6137), YES1(dist=2793)                    | intergenic     |
| 16 | 2883146   | T | C | rs58693641                          | 8.53E-02 | 0.041 | 0.057 | 0.71 | 0.47 | -1.06 | 3.23E-06 | 0.063 | 0.033 | 2.00 | 1.35 | -2.97 | 1.21 | 3.29E-01 | ZG16B                                                 | downstream     |
| 9  | 128959195 | G | A | rs143152284                         | 6.59E-02 | 0.034 | 0.049 | 0.68 | 0.44 | -1.05 | 6.02E-05 | 0.077 | 0.046 | 1.74 | 1.22 | -2.5  | 1.21 | 3.30E-01 | PBX3(dist=229540), LOC101929116(dist=73208)           | intergenic     |
| 8  | 5224922   | C | A | rs75890034                          | 1.42E-01 | 0.061 | 0.079 | 0.77 | 0.55 | -1.07 | 3.97E-05 | 0.097 | 0.054 | 1.90 | 1.37 | -2.62 | 1.14 | 3.30E-01 | CSMD1(dist=372594), LOC100287015(dist=1036155)        | intergenic     |
| 2  | 53415927  | G | T | rs34732784                          | 1.94E-01 | 0.030 | 0.033 | 0.90 | 0.56 | -1.44 | 6.15E-05 | 0.057 | 0.039 | 1.50 | 1    | -2.26 | 1.23 | 3.30E-01 | MIR4431(dist=486174), ASB3(dist=481190)               | intergenic     |
| 19 | 6922504   | T | C | rs11671182                          | 2.08E-02 | 0.246 | 0.206 | 1.26 | 1.04 | -1.52 | 5.71E-05 | 0.148 | 0.227 | 0.59 | 0.46 | -0.77 | 0.93 | 3.31E-01 | ADGRE1                                                | intronic       |
| 5  | 180555737 | C | T | rs55977436                          | 3.22E-01 | 0.077 | 0.089 | 0.85 | 0.63 | -1.16 | 2.56E-05 | 0.110 | 0.074 | 1.56 | 1.15 | -2.11 | 0.81 | 3.33E-01 | OR2V1(dist=3433), OR2V2(dist=26206)                   | intergenic     |
| 19 | 6922815   | T | G | rs7249799                           | 2.21E-02 | 0.253 | 0.213 | 1.25 | 1.04 | -1.51 | 5.64E-05 | 0.152 | 0.232 | 0.59 | 0.46 | -0.77 | 0.93 | 3.33E-01 | ADGRE1                                                | intronic       |
| 18 | 726147    | C | T | rs12327478                          | 2.64E-01 | 0.031 | 0.042 | 0.73 | 0.46 | -1.15 | 8.46E-06 | 0.045 | 0.021 | 2.15 | 1.35 | -3.43 | 1.21 | 3.34E-01 | YES1                                                  | intronic       |
| 8  | 2584991   | T | A | rs10770714                          | 3.42E-01 | 0.106 | 0.100 | 1.07 | 0.82 | -1.4  | 4.69E-05 | 0.135 | 0.097 | 1.46 | 1.11 | -1.93 | 1.19 | 3.35E-01 | LOC101927815                                          | ncRNA_intronic |
| 3  | 72441566  | A | C | rs7629477                           | 1.51E-01 | 0.040 | 0.055 | 0.72 | 0.48 | -1.09 | 3.48E-05 | 0.075 | 0.045 | 1.72 | 1.2  | -2.48 | 1.20 | 3.35E-01 | RYPB                                                  | intronic       |
| 7  | 5618485   | C | A | rs112444852                         | 3.40E-01 | 0.035 | 0.044 | 0.78 | 0.5  | -1.2  | 3.32E-06 | 0.051 | 0.029 | 1.82 | 1.18 | -2.81 | 0.78 | 3.38E-01 | ACTB(dist=48253), FSCN1(dist=13951)                   | intergenic     |
| 1  | 203979304 | G | A | rs12093465                          | 3.30E-01 | 0.110 | 0.102 | 1.08 | 0.83 | -1.4  | 5.29E-05 | 0.120 | 0.081 | 1.54 | 1.15 | -2.06 | 1.18 | 3.38E-01 | SNRPE(dist=139024), LINC00303(dist=22271)             | intergenic     |
| 18 | 725659    | C | T | rs142616950                         | 2.59E-01 | 0.031 | 0.043 | 0.73 | 0.46 | -1.15 | 7.71E-06 | 0.045 | 0.021 | 2.15 | 1.35 | -3.44 | 1.21 | 3.40E-01 | YES1                                                  | intronic       |
| 14 | 49761147  | C | T | rs76506017                          | 5.96E-02 | 0.037 | 0.054 | 0.68 | 0.45 | -1.03 | 6.23E-05 | 0.074 | 0.038 | 2.02 | 1.4  | -2.92 | 1.17 | 3.40E-01 | LINC00648(dist=1496930), RPS29(dist=282243)           | intergenic     |
| 13 | 43868542  | G | A | rs9316006                           | 7.12E-02 | 0.045 | 0.063 | 1.44 | 0.98 | -2.11 | 3.57E-05 | 0.078 | 0.040 | 0.49 | 0.34 | -0.7  | 0.86 | 3.41E-01 | ENOX1                                                 | intronic       |
| 19 | 6923498   | T | C | rs35615093                          | 2.12E-02 | 0.253 | 0.212 | 1.25 | 1.04 | -1.52 | 5.69E-05 | 0.153 | 0.232 | 0.60 | 0.46 | -0.77 | 0.93 | 3.42E-01 | ADGRE1                                                | intronic       |
| 1  | 203979264 | A | C | rs12058431                          | 3.34E-01 | 0.110 | 0.102 | 1.08 | 0.83 | -1.4  | 5.12E-05 | 0.120 | 0.081 | 1.54 | 1.15 | -2.07 | 1.18 | 3.42E-01 | SNRPE(dist=138984), LINC00303(dist=22311)             | intergenic     |
| 5  | 5170200   | A | G | rs140362509                         | 3.34E-01 | 0.026 | 0.032 | 0.79 | 0.48 | -1.32 | 4.55E-05 | 0.046 | 0.027 | 1.74 | 1.1  | -2.75 | 0.73 | 3.44E-01 | ADAMTS16                                              | intronic       |
| 8  | 139201256 | G | A | rs11985216                          | 9.28E-02 | 0.153 | 0.182 | 0.81 | 0.65 | -1.02 | 2.94E-05 | 0.197 | 0.131 | 1.63 | 1.29 | -2.07 | 1.09 | 3.51E-01 | FAM135B                                               | intronic       |
| 8  | 139201200 | C | A | rs11992577                          | 9.26E-02 | 0.153 | 0.182 | 0.81 | 0.65 | -1.02 | 2.94E-05 | 0.197 | 0.131 | 1.63 | 1.29 | -2.07 | 1.09 | 3.52E-01 | FAM135B                                               | intronic       |
| 2  | 56583416  | C | T | rs35118567;rs201510273;rs7565983    | 4.67E-02 | 0.387 | 0.355 | 0.87 | 0.74 | -1.03 | 4.68E-05 | 0.283 | 0.359 | 1.41 | 1.15 | -1.74 | 1.07 | 3.53E-01 | CCDC85A                                               | intronic       |
| 8  | 139201456 | G | A | rs34091786                          | 9.40E-02 | 0.153 | 0.182 | 0.81 | 0.65 | -1.02 | 3.26E-05 | 0.197 | 0.131 | 1.63 | 1.28 | -2.06 | 1.09 | 3.55E-01 | FAM135B                                               | intronic       |
| 8  | 5225383   | G | A | rs114969167                         | 1.03E-01 | 0.061 | 0.080 | 0.75 | 0.54 | -1.04 | 3.44E-05 | 0.097 | 0.054 | 1.90 | 1.37 | -2.62 | 1.13 | 3.57E-01 | CSMD1(dist=373055), LOC100287015(dist=1035694)        | intergenic     |
| 2  | 23117807  | T | G | rs76221152                          | 3.59E-01 | 0.035 | 0.032 | 1.10 | 0.71 | -1.72 | 3.79E-06 | 0.041 | 0.025 | 1.67 | 1.03 | -2.71 | 1.36 | 3.61E-01 | LOC102723362(dist=356648), KLHL29(dist=490491)        | intronic       |
| 8  | 139199114 | C | T | rs77972768                          | 9.48E-02 | 0.150 | 0.178 | 0.81 | 0.65 | -1.01 | 4.26E-05 | 0.197 | 0.132 | 1.62 | 1.27 | -2.05 | 1.09 | 3.62E-01 | FAM135B                                               | intronic       |
| 2  | 106890590 | C | T | rs181747231                         | 3.64E-01 | 0.022 | 0.027 | 0.82 | 0.47 | -1.42 | 7.42E-07 | 0.035 | 0.021 | 1.71 | 1.02 | -2.88 | 0.73 | 3.66E-01 | UXS1(dist=79795), PLGLA(dist=107980)                  | intergenic     |
| 17 | 76295961  | G | A | rs4789581                           | 3.80E-01 | 0.034 | 0.027 | 0.80 | 0.5  | -1.26 | 1.29E-05 | 0.060 | 0.047 | 0.77 | 0.72 | -1.14 | 0.77 | 3.74E-01 | LOC100996291(dist=21388), SOCS3(dist=56897)           | intergenic     |
| 18 | 67882321  | C | T | rs140668218;rs188396929;rs370134073 | 3.72E-01 | 0.102 | 0.095 | 1.09 | 0.83 | -1.43 | 7.05E-06 | 0.039 | 0.024 | 1.66 | 1.01 | -2.72 | 1.15 | 3.75E-01 | RTTN(dist=9359), SOCS6(dist=73816)                    | intergenic     |
| 2  | 238518759 | A | C | rs140855815                         | 3.73E-01 | 0.076 | 0.071 | 1.08 | 0.79 | -1.46 | 3.39E-05 | 0.121 | 0.085 | 1.50 | 1.12 | -2    | 1.18 | 3.76E-01 | RAB17(dist=18990), LRRFP1(dist=17465)                 | intergenic     |
| 5  | 146057135 | T | C | rs142740224                         | 3.70E-01 | 0.026 | 0.022 | 1.18 | 0.7  | -1.98 | 7.51E-06 | 0.039 | 0.023 | 1.77 | 1.08 | -2.9  | 1.40 | 3.80E-01 | PPP2R2B                                               | intronic       |
| 17 | 76294376  | C | T | rs9709190                           | 3.88E-01 | 0.035 | 0.028 | 0.79 | 0.51 | -1.25 | 9.82E-06 | 0.062 | 0.048 | 0.76 | 0.52 | -1.12 | 0.78 | 3.82E-01 | LOC100996291(dist=19803), SOCS3(dist=58482)           | intergenic     |
| 11 | 6338430   | T | C | rs115457693                         | 3.86E-01 | 0.025 | 0.032 | 0.78 | 0.47 | -1.3  | 1.76E-05 | 0.056 | 0.033 | 1.75 | 1.16 | -2.66 | 0.78 | 3.85E-01 | CCKBR(dist=45073), PRKCDBP(dist=1746)                 | intergenic     |
| 4  | 33303471  | C | T | rs149592865                         | 3.85E-01 | 0.017 | 0.021 | 0.82 | 0.44 | -1.52 | 6.92E-07 | 0.038 | 0.022 | 1.74 | 1.06 | -2.86 | 0.70 | 3.85E-01 | LOC102723828(dist=1146443), LOC101928622(dist=594490) | intergenic     |
| 20 | 8047943   | G | A | rs113362796                         | 3.91E-01 | 0.035 | 0.032 | 1.08 | 0.69 | -1.69 | 5.29E-05 | 0.047 | 0.028 | 1.71 | 1.09 | -2.69 | 1.32 | 3.98E-01 | TMX4(dist=47467), PLCB1(dist=64969)                   | intergenic     |
| 2  | 183623760 | A | G | rs16823660                          | 2.04E-01 | 0.020 | 0.030 | 0.66 | 0.38 | -1.17 | 2.70E-05 | 0.042 | 0.023 | 1.88 | 1.17 | -3.04 | 1.22 | 3.98E-01 | DNAJC10                                               | intronic       |
| 1  | 66947708  | G | T | rs138826140                         | 5.23E-02 | 0.107 | 0.128 | 1.22 | 0.94 | -1.59 | 3.97E-05 | 0.166 | 0.123 | 0.70 | 0.54 | -0.9  | 0.90 | 3.99E-01 | PDE4B(dist=107446), SGIP1(dist=52117)                 | intergenic     |
| 7  | 13779942  | T | C | rs73679179                          | 4.04E-01 | 0.037 | 0.044 | 0.82 | 0.54 | -1.26 | 7.68E-06 | 0.049 | 0.027 | 1.87 | 1.2  | -2.93 | 0.80 | 4.02E-01 | ARL4A(dist=1049384), ETV11(dist=150914)               | intergenic     |
| 18 | 722539    | C | T | rs73943168                          | 2.26E-01 | 0.032 | 0.044 | 0.71 | 0.45 | -1.12 | 8.91E-06 | 0.045 | 0.021 | 2.15 | 1.34 | -3.43 | 1.18 | 4.07E-01 | YES1(NM_005433;c.*1885A>G)                            | UTR3           |
| 2  | 193588413 | A | G | rs75617850                          | 4.05E-01 | 0.020 | 0.021 | 0.96 | 0.53 | -1.72 | 5.22E-06 | 0.035 | 0.023 | 1.55 | 0.93 | -2.6  | 0.72 | 4.08E-01 | TMFF2(dist=528754), PCGEM1(dist=26158)                | intergenic     |
| 18 | 720208    | A | G | rs77691870                          | 2.23E-01 | 0.031 | 0.044 | 0.71 | 0.45 | -1.12 | 5.46E-06 | 0.044 | 0.021 | 1.18 | 1.36 | -3.5  | 1.18 | 4.09E-01 | ENOSF1(dist=7546), YES1(dist=1384)                    | intergenic     |
| 8  | 96325066  | G | A | rs77551618                          | 1.91E-01 | 0.018 | 0.022 | 0.82 | 0.45 | -1.5  | 8.13E-06 | 0.035 | 0.022 | 1.61 | 0.96 | -2.7  | 1.28 | 4.10E-01 | C8orf37-AS1                                           | ncRNA_intronic |
| 18 | 720739    | A | G | rs78524119                          | 2.20E-01 | 0.031 | 0.044 | 0.71 | 0.45 | -1.12 | 5.48E-06 | 0.044 | 0.021 | 2.18 | 1.   |       |      |          |                                                       |                |

|    |           |   |   |                         |          |       |       |      |      |       |          |       |       |      |      |       |      |          |                                                     |                |
|----|-----------|---|---|-------------------------|----------|-------|-------|------|------|-------|----------|-------|-------|------|------|-------|------|----------|-----------------------------------------------------|----------------|
| 17 | 75240179  | G | C | rs80236960              | 4.60E-01 | 0.037 | 0.028 | 1.31 | 0.84 | -2.04 | 9.93E-06 | 0.065 | 0.046 | 1.45 | 0.99 | -2.14 | 1.26 | 4.54E-01 | SEC14L1(dist=26998), SEPT9(dist=37313)              | intergenic     |
| 19 | 56038294  | T | C | rs677818                | 4.53E-01 | 0.024 | 0.029 | 1.24 | 0.73 | -2.09 | 7.75E-06 | 0.046 | 0.029 | 0.62 | 0.39 | -0.98 | 1.23 | 4.55E-01 | SSC5D(dist=7828), SBK2(dist=2806)                   | intergenic     |
| 19 | 56038286  | T | C | rs677832                | 4.54E-01 | 0.024 | 0.029 | 1.24 | 0.73 | -2.09 | 7.74E-06 | 0.046 | 0.029 | 0.62 | 0.39 | -0.98 | 1.23 | 4.55E-01 | SSC5D(dist=7820), SBK2(dist=2814)                   | intergenic     |
| 13 | 43845004  | T | C | rs7332948               | 7.51E-02 | 0.072 | 0.094 | 1.34 | 0.98 | -1.82 | 5.79E-05 | 0.097 | 0.057 | 0.56 | 0.4  | -0.77 | 0.90 | 4.55E-01 | ENOX1                                               | intronic       |
| 19 | 56038029  | A | G | rs678865                | 4.57E-01 | 0.024 | 0.029 | 1.24 | 0.73 | -2.09 | 7.74E-06 | 0.046 | 0.029 | 0.62 | 0.39 | -0.98 | 1.23 | 4.58E-01 | SSC5D(dist=7563), SBK2(dist=3071)                   | intergenic     |
| 18 | 69317237  | G | A | rs62102008              | 4.58E-01 | 0.048 | 0.051 | 0.94 | 0.64 | -1.37 | 3.48E-05 | 0.080 | 0.055 | 1.49 | 1.05 | -2.11 | 0.87 | 4.61E-01 | LINC01541(dist=71045), LOC102724913(dist=82615)     | intergenic     |
| 4  | 163243116 | C | T | rs72977259              | 4.69E-01 | 0.029 | 0.026 | 1.10 | 0.67 | -1.8  | 1.76E-06 | 0.052 | 0.028 | 1.86 | 1.2  | -2.87 | 1.28 | 4.69E-01 | FTL5(dist=157930), MIR4454(dist=771610)             | intergenic     |
| 15 | 80950369  | A | G | rs28394202              | 2.31E-02 | 0.060 | 0.086 | 0.68 | 0.48 | -0.94 | 3.37E-05 | 0.114 | 0.069 | 1.74 | 1.29 | -2.35 | 1.10 | 4.70E-01 | ARN2T2(dist=60092), ABHD17C(dist=37283)             | intergenic     |
| 9  | 39136470  | G | C | rs7046086               | 4.68E-01 | 0.382 | 0.400 | 0.93 | 0.78 | -1.09 | 2.80E-05 | 0.373 | 0.315 | 1.29 | 1.06 | -1.56 | 0.92 | 4.72E-01 | CNTNAP3                                             | intronic       |
| 11 | 6327854   | C | T | rs7945948               | 4.74E-01 | 0.037 | 0.045 | 0.83 | 0.54 | -1.27 | 1.16E-05 | 0.076 | 0.048 | 1.63 | 1.14 | -2.34 | 0.84 | 4.73E-01 | CCKBR(dist=34497), PRKCDBP(dist=12322)              | intergenic     |
| 9  | 39120434  | G | A | rs12001874              | 4.69E-01 | 0.381 | 0.399 | 0.93 | 0.79 | -1.1  | 1.72E-05 | 0.376 | 0.318 | 1.29 | 1.07 | -1.57 | 0.92 | 4.74E-01 | CNTNAP3                                             | intronic       |
| 10 | 1568514   | C | T | rs115577771             | 4.71E-01 | 0.056 | 0.052 | 1.09 | 0.76 | -1.55 | 2.19E-05 | 0.050 | 0.033 | 1.56 | 1    | -2.41 | 1.18 | 4.82E-01 | ADARB2                                              | intronic       |
| 14 | 107189063 | T | A | rs112281955             | 4.74E-01 | 0.028 | 0.021 | 1.39 | 0.84 | -2.31 | 3.98E-10 | 0.056 | 0.036 | 1.59 | 1.05 | -2.4  | 1.26 | 4.84E-01 | MIR7641-2(dist=96298), MIR5195(dist=70037)          | intergenic     |
| 6  | 26746273  | G | A | rs2504591               | 4.63E-01 | 0.039 | 0.035 | 1.10 | 0.72 | -1.68 | 2.71E-05 | 0.059 | 0.037 | 1.64 | 1.09 | -2.46 | 1.25 | 4.85E-01 | ZNF322(dist=86293), GUSBP2(dist=92993)              | intergenic     |
| 4  | 7122510   | G | T | rs73077726              | 4.89E-01 | 0.036 | 0.033 | 1.09 | 0.71 | -1.7  | 5.88E-05 | 0.047 | 0.031 | 1.56 | 0.99 | -2.44 | 1.25 | 4.89E-01 | FLJ36777(dist=17407), SORCS2(dist=71864)            | intergenic     |
| 7  | 1643041   | C | T | rs11768560              | 4.97E-01 | 0.036 | 0.034 | 1.07 | 0.69 | -1.67 | 6.06E-05 | 0.056 | 0.042 | 1.36 | 0.9  | -2.05 | 1.23 | 4.95E-01 | PSMG3-AS1(dist=13780), TTFAMP1(dist=11065)          | intergenic     |
| 17 | 630692    | G | A | rs117104857             | 5.04E-01 | 0.033 | 0.029 | 1.13 | 0.71 | -1.79 | 1.45E-05 | 0.040 | 0.026 | 1.57 | 0.97 | -2.54 | 1.24 | 4.98E-01 | VPS53(dist=12596), FAM57A(dist=5155)                | intergenic     |
| 21 | 40902489  | C | A | rs76605103              | 7.10E-03 | 0.138 | 0.180 | 0.73 | 0.58 | -0.92 | 4.04E-05 | 0.239 | 0.171 | 1.52 | 1.22 | -1.9  | 1.06 | 5.00E-01 | SH3BGR(dist=15056), B3GALT5-AS1(dist=66586)         | intergenic     |
| 12 | 8926584   | C | T | rs73247491              | 5.04E-01 | 0.028 | 0.026 | 1.11 | 0.67 | -1.82 | 1.08E-05 | 0.037 | 0.021 | 1.74 | 1.05 | -2.91 | 1.26 | 5.02E-01 | RIMKLB(NM_001297776:c.*204C>T, NM_020734:c.*204C>T) | UTR3           |
| 17 | 44853141  | G | A | rs140394071             | 5.10E-01 | 0.025 | 0.031 | 0.82 | 0.49 | -1.36 | 6.47E-05 | 0.040 | 0.023 | 1.80 | 1.1  | -2.94 | 0.82 | 5.05E-01 | WNT3                                                | intronic       |
| 16 | 5410923   | G | A | rs62017693              | 5.00E-01 | 0.035 | 0.029 | 1.22 | 0.78 | -1.92 | 1.46E-05 | 0.051 | 0.032 | 1.61 | 1.04 | -2.48 | 1.23 | 5.06E-01 | EEF2KMT(dist=263102), LINC01570(dist=240247)        | intergenic     |
| 9  | 93176973  | C | T | rs188710561             | 5.02E-01 | 0.035 | 0.040 | 0.87 | 0.56 | -1.35 | 3.83E-06 | 0.057 | 0.031 | 1.87 | 1.23 | -2.82 | 0.82 | 5.06E-01 | LINC01508                                           | ncRNA_intronic |
| 17 | 44363602  | C | T | rs8081198               | 5.16E-01 | 0.049 | 0.048 | 1.02 | 0.7  | -1.49 | 1.30E-08 | 0.057 | 0.038 | 1.54 | 1.02 | -2.32 | 1.21 | 5.10E-01 | KANSL1(dist=60862), LRRC37A(dist=8895)              | intergenic     |
| 4  | 156861989 | C | T | rs182907811             | 1.25E-01 | 0.026 | 0.037 | 0.70 | 0.43 | -1.14 | 4.66E-05 | 0.052 | 0.032 | 1.66 | 1.08 | -2.56 | 1.17 | 5.14E-01 | CTSO                                                | intronic       |
| 10 | 7719325   | C | T | rs111627827             | 5.13E-01 | 0.057 | 0.064 | 0.89 | 0.63 | -1.26 | 5.40E-05 | 0.066 | 0.044 | 1.55 | 1.06 | -2.27 | 0.87 | 5.23E-01 | ITIH5(dist=10364), ITIH2(dist=25911)                | intergenic     |
| 9  | 137926960 | G | A | rs116028950             | 5.21E-01 | 0.033 | 0.030 | 1.11 | 0.7  | -1.76 | 1.65E-09 | 0.040 | 0.021 | 1.94 | 1.19 | -3.16 | 1.21 | 5.26E-01 | FCN1(dist=117154), OLFM1(dist=40129)                | intergenic     |
| 2  | 12667829  | C | T | rs62123094              | 5.25E-01 | 0.025 | 0.029 | 0.86 | 0.51 | -1.43 | 3.64E-05 | 0.044 | 0.027 | 1.67 | 1.05 | -2.65 | 0.81 | 5.27E-01 | LOC100506457                                        | ncRNA_intronic |
| 4  | 7578257   | A | C | rs114326216             | 5.28E-01 | 0.022 | 0.027 | 0.81 | 0.47 | -1.39 | 2.90E-05 | 0.038 | 0.023 | 1.70 | 1.03 | -2.81 | 0.84 | 5.28E-01 | SORCS2                                              | intronic       |
| 20 | 7073431   | C | T | rs59739538              | 5.29E-01 | 0.036 | 0.042 | 0.85 | 0.56 | -1.31 | 1.49E-08 | 0.042 | 0.023 | 1.85 | 1.15 | -2.98 | 0.86 | 5.35E-01 | BMP2(dist=312521), LINC01428(dist=53683)            | intergenic     |
| 8  | 17562084  | A | G | rs7461619               | 5.45E-01 | 0.036 | 0.033 | 0.90 | 0.58 | -1.39 | 1.40E-06 | 0.042 | 0.023 | 0.54 | 0.33 | -0.87 | 0.86 | 5.39E-01 | MTUS1                                               | intronic       |
| 16 | 9206594   | C | G | rs76304817              | 5.40E-01 | 0.034 | 0.032 | 1.06 | 0.67 | -1.66 | 5.99E-09 | 0.041 | 0.025 | 1.70 | 1.05 | -2.76 | 1.23 | 5.45E-01 | C16orf72                                            | intronic       |
| 1  | 8359110   | T | C | rs545419977;rs116305284 | 5.39E-01 | 0.052 | 0.044 | 1.21 | 0.84 | -1.76 | 5.69E-05 | 0.101 | 0.083 | 1.25 | 0.92 | -1.71 | 1.15 | 5.46E-01 | LOC102724539(dist=83842), SLC45A1(dist=19035)       | intergenic     |
| 19 | 53851268  | T | C | rs8103209               | 5.45E-01 | 0.188 | 0.179 | 0.94 | 0.77 | -1.16 | 1.66E-05 | 0.203 | 0.164 | 0.77 | 0.61 | -0.97 | 0.93 | 5.47E-01 | ZNF845                                              | intronic       |
| 15 | 91706054  | G | T | rs144673277             | 5.51E-01 | 0.021 | 0.025 | 0.81 | 0.46 | -1.43 | 6.02E-05 | 0.035 | 0.021 | 1.71 | 1.02 | -2.86 | 0.81 | 5.52E-01 | SV2B                                                | intronic       |
| 16 | 81188025  | G | C | rs79898431              | 5.52E-01 | 0.019 | 0.021 | 0.89 | 0.49 | -1.61 | 2.10E-05 | 0.043 | 0.031 | 1.44 | 0.91 | -2.3  | 0.81 | 5.57E-01 | PKD1L2                                              | intronic       |
| 2  | 147052071 | T | C | rs143943945             | 5.57E-01 | 0.018 | 0.021 | 0.86 | 0.47 | -1.57 | 6.08E-09 | 0.043 | 0.021 | 2.09 | 1.3  | -3.36 | 0.82 | 5.59E-01 | TEX41(dist=1217780), PABPC1P2(dist=292554)          | intergenic     |
| 2  | 147053548 | T | C | rs148945983             | 5.57E-01 | 0.018 | 0.021 | 0.86 | 0.47 | -1.58 | 1.00E-08 | 0.043 | 0.021 | 2.06 | 1.28 | -3.32 | 0.82 | 5.59E-01 | TEX41(dist=1219257), PABPC1P2(dist=291077)          | intergenic     |
| 7  | 105289487 | C | T | rs502600                | 5.61E-01 | 0.025 | 0.028 | 0.90 | 0.54 | -1.51 | 5.06E-06 | 0.044 | 0.030 | 1.51 | 0.95 | -2.4  | 0.85 | 5.59E-01 | ATXN7L1                                             | intronic       |
| 2  | 147053246 | T | G | rs149778684             | 5.59E-01 | 0.018 | 0.021 | 0.86 | 0.47 | -1.58 | 5.92E-09 | 0.043 | 0.021 | 2.09 | 1.3  | -3.36 | 0.82 | 5.61E-01 | TEX41(dist=1218955), PABPC1P2(dist=291379)          | intergenic     |
| 21 | 42542467  | C | T | rs73902938              | 5.57E-01 | 0.045 | 0.051 | 0.88 | 0.59 | -1.29 | 8.20E-08 | 0.049 | 0.030 | 1.64 | 1.05 | -2.55 | 0.87 | 5.66E-01 | BACE2                                               | intronic       |
| 8  | 28613037  | G | A | rs59815642              | 5.72E-01 | 0.045 | 0.037 | 1.24 | 0.83 | -1.85 | 5.49E-05 | 0.076 | 0.055 | 1.42 | 0.99 | -2.03 | 1.14 | 5.66E-01 | EXTL3(dist=1830), INTS9(dist=12138)                 | intergenic     |
| 2  | 147059706 | C | T | rs144225631             | 5.65E-01 | 0.018 | 0.021 | 0.86 | 0.47 | -1.58 | 5.64E-09 | 0.043 | 0.021 | 2.09 | 1.3  | -3.37 | 0.82 | 5.67E-01 | TEX41(dist=1225415), PABPC1P2(dist=284919)          | intergenic     |
| 8  | 17561601  | A | G | rs386723030;rs7386612   | 5.74E-01 | 0.036 | 0.033 | 0.90 | 0.58 | -1.4  | 1.42E-06 | 0.042 | 0.023 | 0.54 | 0.33 | -0.87 | 0.87 | 5.69E-01 | MTUS1                                               | intronic       |
| 15 | 84918140  | G | T | rs2401449               | 5.75E-01 | 0.044 | 0.042 | 1.06 | 0.71 | -1.58 | 4.81E-05 | 0.038 | 0.023 | 1.72 | 1.04 | -2.83 | 1.18 | 5.75E-01 | GOLGA6L4(dist=4020), LOC103171574(dist=59077)       | intergenic     |
| 17 | 747637    | C | T | rs139652938             | 5.84E-01 | 0.026 | 0.028 | 0.93 | 0.56 | -1.54 | 4.55E-06 | 0.040 | 0.027 | 1.47 | 0.91 | -2.39 | 0.85 | 5.79E-01 | NXN                                                 | intronic       |
| 2  | 231533007 | G | A | rs78099529              | 5.77E-01 | 0.067 | 0.067 | 1.01 | 0.73 | -1.4  | 1.93E-05 | 0.079 | 0.054 | 1.50 | 1.06 | -2.13 | 1.14 | 5.80E-01 | SP100(dist=122690), LOC151475(dist=22629)           | intergenic     |
| 10 | 134641975 | C | T | rs61860850              | 5.72E-01 | 0.022 | 0.021 | 1.06 | 0.61 | -1.85 | 8.77E-07 | 0.046 | 0.032 | 1.46 | 0.93 | -2.3  | 0.80 | 5.80E-01 | CFAP46                                              | intronic       |
| 11 | 6328084   | G | A | rs7945360               | 5.83E-01 | 0.031 | 0.036 | 0.84 | 0.53 | -1.34 | 2.26E-06 | 0.065 | 0.039 | 1.71 | 1.16 | -2.52 | 0.87 | 5.82E-01 | CCKBR(dist=34727), PRKCDBP(dist=12092)              | intergenic     |
| 11 | 61060654  | G | A | rs111341988             | 5.83E-01 | 0.025 | 0.026 | 0.99 | 0.59 | -1.66 | 9.23E-06 | 0.048 | 0.036 | 1.36 | 0.88 | -2.12 | 0.83 | 5.82E-01 | VWCE                                                | intronic       |
| 3  | 133729441 | C | T | rs113732791             | 5.82E-01 | 0.045 | 0.043 | 1.04 | 0.7  | -1.55 | 7.33E-06 | 0.049 | 0.027 | 1.88 | 1.21 | -2.94 | 1.16 | 5.83E-01 | SLCO2A1                                             | intronic       |
| 13 | 41037309  | A | G | rs150864528             | 7.73E-02 | 0.020 | 0.031 | 0.63 | 0.36 | -1.12 | 2.35E-05 | 0.041 | 0.021 | 1.94 | 1.19 | -3.16 | 1.15 | 5.92E-01 | LINC00598                                           | ncRNA_intronic |
| 14 | 100376715 | G | A | rs2145859               | 5.84E-01 | 0.035 | 0.028 | 1.26 | 0.81 | -1.98 | 3.71E-06 | 0.062 | 0.044 | 1.42 | 0.96 | -2.11 | 1.20 | 5.92E-01 | EML1                                                | intronic       |
| 17 | 1863245   | C | T | rs76513460              | 5.98E-01 | 0.031 | 0.035 | 0.89 | 0.56 | -1.41 | 5.65E-05 | 0.034 | 0.022 | 1.57 | 0.92 | -2.66 | 0.87 | 5.93E-01 | RTN4RL1                                             | intronic       |
| 19 | 53851654  | A | G | rs8102760               | 5.93E-01 | 0.231 | 0.243 | 1.07 | 0.88 | -1.3  | 1.45E-05 | 0.264 | 0.216 | 0.77 | 0.62 | -0.95 | 1.06 | 5.94E-01 | ZNF845                                              | intronic       |
| 13 | 106426257 | C | A | rs75773204              | 5.95E-01 | 0.040 | 0.039 | 1.04 | 0.68 | -1.57 | 1.48E-05 | 0.055 | 0.033 | 1.69 | 1.11 | -2.58 | 1.17 | 5.98E-01 | LINC00343(dist=12112), LINC00460(dist=602654)       | intergenic     |
| 6  | 169956256 | C | G | rs76548577              | 5.82E-01 | 0.022 | 0.023 | 0.94 | 0.54 | -1.63 | 2.84E-05 | 0.041 | 0.027 | 1.54 | 0.96 | -2.48 | 0.81 | 6.00E-01 | WDR27                                               | intronic       |
| 9  | 128909853 | G | A | rs114516315             | 7.94E-03 | 0.016 | 0.033 | 0.46 | 0.25 | -0.86 | 2.53E-05 | 0.041 | 0.0   |      |      |       |      |          |                                                     |                |

|    |           |   |   |                        |          |       |       |      |      |       |          |       |       |      |      |       |      |          |                                                 |            |
|----|-----------|---|---|------------------------|----------|-------|-------|------|------|-------|----------|-------|-------|------|------|-------|------|----------|-------------------------------------------------|------------|
| 11 | 1730555   | C | T | rs183120274            | 6.42E-01 | 0.064 | 0.061 | 1.05 | 0.75 | -1.46 | 2.89E-06 | 0.097 | 0.072 | 1.39 | 1.01 | -1.91 | 1.12 | 6.42E-01 | KRTAP5-6(dist=11570), IFITM10(dist=23085)       | intergenic |
| 14 | 101644410 | G | T | rs8006859              | 6.35E-01 | 0.040 | 0.035 | 0.87 | 0.57 | -1.33 | 2.40E-05 | 0.078 | 0.057 | 0.71 | 0.5  | -1.01 | 0.89 | 6.42E-01 | MEG9(dist=105137), LINC00524(dist=227914)       | intergenic |
| 17 | 75243343  | G | C | rs117939713            | 6.47E-01 | 0.037 | 0.030 | 1.23 | 0.79 | -1.91 | 6.53E-06 | 0.064 | 0.045 | 1.44 | 0.98 | -2.12 | 1.15 | 6.43E-01 | SEC14L1(dist=30162), SEPT9(dist=34149)          | intergenic |
| 17 | 66058258  | T | A | rs113678852            | 6.48E-01 | 0.039 | 0.039 | 1.01 | 0.66 | -1.54 | 1.02E-06 | 0.054 | 0.030 | 1.85 | 1.21 | -2.83 | 1.14 | 6.43E-01 | KPNA2(dist=15288), LINC00674(dist=39438)        | intergenic |
| 17 | 627630    | C | T | rs143082925            | 6.48E-01 | 0.035 | 0.032 | 1.08 | 0.69 | -1.69 | 9.66E-06 | 0.047 | 0.030 | 1.58 | 1.01 | -2.48 | 1.15 | 6.44E-01 | VP553(dist=9534), FAM57A(dist=8217)             | intergenic |
| 14 | 101644405 | G | A | rs8006855              | 6.37E-01 | 0.040 | 0.035 | 0.87 | 0.57 | -1.33 | 2.49E-05 | 0.078 | 0.057 | 0.71 | 0.5  | -1.01 | 0.89 | 6.44E-01 | MEG9(dist=105132), LINC00524(dist=227919)       | intergenic |
| 8  | 140825816 | G | A | rs112705315            | 6.52E-01 | 0.026 | 0.024 | 1.08 | 0.64 | -1.81 | 1.45E-05 | 0.036 | 0.020 | 1.82 | 1.09 | -3.05 | 1.19 | 6.47E-01 | TRAPP9                                          | intronic   |
| 6  | 4614001   | T | C | rs77719159             | 6.32E-01 | 0.044 | 0.041 | 1.02 | 0.68 | -1.53 | 4.21E-05 | 0.042 | 0.026 | 1.64 | 1.02 | -2.64 | 1.14 | 6.48E-01 | KU-MEL-3(dist=1848), NONE(dist=NONE)            | intergenic |
| 7  | 105114221 | G | C | rs10235921             | 6.53E-01 | 0.055 | 0.054 | 1.02 | 0.71 | -1.46 | 2.00E-05 | 0.070 | 0.041 | 1.74 | 1.19 | -2.53 | 1.12 | 6.51E-01 | PUS7                                            | intronic   |
| 8  | 138650172 | C | T | rs75467209             | 6.63E-01 | 0.031 | 0.034 | 0.92 | 0.58 | -1.47 | 5.47E-05 | 0.054 | 0.034 | 1.61 | 1.06 | -2.45 | 0.88 | 6.59E-01 | LOC101927915(dist=224341), FAM135B(dist=492094) | intergenic |
| 2  | 239883189 | G | T | rs115130806            | 6.59E-01 | 0.025 | 0.028 | 0.89 | 0.53 | -1.5  | 4.62E-05 | 0.035 | 0.022 | 1.61 | 0.96 | -2.71 | 0.86 | 6.61E-01 | FLJ43879(dist=35224), HDAC4(dist=86675)         | intergenic |
| 18 | 5361772   | C | G | rs112007341            | 6.62E-01 | 0.048 | 0.048 | 0.99 | 0.67 | -1.45 | 4.84E-05 | 0.067 | 0.044 | 1.57 | 1.08 | -2.3  | 1.12 | 6.64E-01 | ZBTB14(dist=64720), EPB41L3(dist=30608)         | intergenic |
| 17 | 31526331  | C | T | rs17836713             | 6.71E-01 | 0.056 | 0.060 | 0.93 | 0.65 | -1.32 | 5.61E-05 | 0.085 | 0.058 | 1.53 | 1.09 | -2.15 | 0.92 | 6.67E-01 | ASIC2                                           | intronic   |
| 16 | 83965086  | G | T | rs144213123            | 6.68E-01 | 0.030 | 0.029 | 1.06 | 0.65 | -1.7  | 5.68E-08 | 0.039 | 0.021 | 1.92 | 1.17 | -3.15 | 1.13 | 6.72E-01 | MLYCD(dist=15299), OSGIN1(dist=21741)           | intergenic |
| 4  | 73394306  | G | C | rs77849408             | 6.76E-01 | 0.023 | 0.023 | 0.99 | 0.58 | -1.7  | 1.05E-07 | 0.055 | 0.033 | 1.70 | 1.12 | -2.58 | 0.85 | 6.75E-01 | ADAMT3                                          | intronic   |
| 17 | 76297272  | T | C | rs4789026              | 6.62E-01 | 0.037 | 0.033 | 0.89 | 0.57 | -1.37 | 1.97E-05 | 0.064 | 0.051 | 0.78 | 0.53 | -1.14 | 0.89 | 6.78E-01 | LOC100996291(dist=22699), SOCS3(dist=55586)     | intergenic |
| 4  | 189132522 | T | C | rs28814977,rs386683773 | 6.79E-01 | 0.026 | 0.023 | 1.14 | 0.68 | -1.91 | 4.80E-06 | 0.045 | 0.032 | 1.42 | 0.9  | -2.24 | 1.18 | 6.78E-01 | TRIML1(dist=63873), LINC01060(dist=244210)      | intergenic |
| 3  | 80875886  | G | T | rs13091490             | 6.82E-01 | 0.199 | 0.197 | 0.99 | 0.8  | -1.21 | 5.03E-05 | 0.234 | 0.178 | 0.71 | 0.57 | -0.89 | 0.94 | 6.82E-01 | ROBO1(dist=1058827), GBE1(dist=662964)          | intergenic |
| 16 | 85478512  | G | A | rs115349350            | 6.85E-01 | 0.045 | 0.052 | 0.86 | 0.58 | -1.26 | 3.68E-05 | 0.055 | 0.033 | 1.72 | 1.13 | -2.62 | 0.91 | 6.89E-01 | MIR5093(dist=138581), GSE1(dist=166517)         | intergenic |
| 10 | 114053870 | C | T | rs41298239             | 6.84E-01 | 0.031 | 0.031 | 1.01 | 0.63 | -1.61 | 1.51E-05 | 0.044 | 0.028 | 1.61 | 1.01 | -2.56 | 0.88 | 6.91E-01 | TECTB                                           | intronic   |
| 17 | 8315834   | C | T | rs143261676            | 6.96E-01 | 0.026 | 0.023 | 1.11 | 0.66 | -1.87 | 2.60E-09 | 0.043 | 0.024 | 1.84 | 1.15 | -2.96 | 1.16 | 6.92E-01 | RNF222(dist=14690), NDEL1(dist=23336)           | intergenic |
| 10 | 24772750  | G | T | rs76167824             | 6.92E-01 | 0.040 | 0.045 | 0.90 | 0.6  | -1.36 | 8.15E-07 | 0.046 | 0.025 | 1.88 | 1.19 | -2.97 | 0.90 | 6.99E-01 | KIAA1217                                        | intronic   |
| 3  | 143732138 | T | C | rs78299534             | 7.01E-01 | 0.022 | 0.024 | 0.89 | 0.51 | -1.55 | 1.26E-05 | 0.034 | 0.021 | 1.61 | 0.95 | -2.73 | 0.88 | 7.02E-01 | C3orf58(dist=20928), NONE(dist=NONE)            | intergenic |
| 7  | 87663216  | G | C | rs114657673            | 7.04E-01 | 0.019 | 0.021 | 0.91 | 0.51 | -1.65 | 4.47E-06 | 0.032 | 0.020 | 1.58 | 0.92 | -2.72 | 0.86 | 7.02E-01 | ADAM22                                          | intronic   |
| 7  | 87662138  | T | A | rs137964304            | 7.05E-01 | 0.019 | 0.021 | 0.91 | 0.51 | -1.65 | 4.35E-06 | 0.032 | 0.020 | 1.58 | 0.92 | -2.72 | 0.86 | 7.03E-01 | ADAM22                                          | intronic   |
| 18 | 2430942   | T | G | rs76205126             | 7.02E-01 | 0.028 | 0.033 | 0.86 | 0.53 | -1.4  | 1.16E-05 | 0.036 | 0.020 | 1.82 | 1.09 | -3.05 | 0.91 | 7.04E-01 | LINC00470(dist=1071312), METTL4(dist=106582)    | intergenic |
| 17 | 76314189  | A | G | rs4429354              | 7.08E-01 | 0.028 | 0.025 | 0.90 | 0.55 | -1.47 | 8.60E-07 | 0.063 | 0.047 | 0.73 | 0.5  | -1.08 | 0.89 | 7.04E-01 | LOC100996291(dist=39616), SOCS3(dist=38669)     | intergenic |
| 17 | 66075599  | G | A | rs113252779            | 7.09E-01 | 0.037 | 0.037 | 1.00 | 0.65 | -1.54 | 3.50E-07 | 0.053 | 0.029 | 1.91 | 1.24 | -2.93 | 1.12 | 7.05E-01 | KPNA2(dist=32629), LINC00674(dist=22097)        | intergenic |
| 20 | 1878743   | C | T | rs114914040            | 7.08E-01 | 0.027 | 0.031 | 0.86 | 0.52 | -1.42 | 3.06E-05 | 0.046 | 0.026 | 1.77 | 1.12 | -2.81 | 0.90 | 7.12E-01 | SIRPA                                           | intronic   |
| 5  | 75047895  | C | T | rs11750165             | 7.10E-01 | 0.041 | 0.034 | 1.23 | 0.81 | -1.87 | 2.22E-05 | 0.055 | 0.043 | 1.30 | 0.86 | -1.96 | 1.13 | 7.15E-01 | POC5(dist=34582), SV2C(dist=331344)             | intergenic |
| 16 | 2881930   | A | G | rs35533993             | 4.26E-02 | 0.041 | 0.063 | 0.64 | 0.43 | -0.95 | 3.18E-06 | 0.064 | 0.033 | 2.01 | 1.35 | -2.98 | 1.06 | 7.17E-01 | ZG16B                                           | exonic     |
| 9  | 118986381 | T | G | rs73654678             | 3.17E-05 | 0.037 | 0.023 | 1.65 | 1.05 | -2.61 | 7.13E-01 | 0.030 | 0.031 | 0.98 | 0.56 | -1.69 | 0.89 | 7.18E-01 | PAPPA                                           | intronic   |
| 8  | 516356    | G | T | rs73670324             | 7.24E-01 | 0.055 | 0.060 | 0.91 | 0.64 | -1.3  | 2.64E-05 | 0.066 | 0.041 | 1.66 | 1.13 | -2.43 | 0.92 | 7.20E-01 | TDRP(dist=20575), ERICH1(dist=48381)            | intergenic |
| 19 | 53850390  | T | C | rs7260245              | 7.20E-01 | 0.180 | 0.175 | 0.97 | 0.78 | -1.2  | 3.75E-05 | 0.204 | 0.166 | 0.77 | 0.61 | -0.98 | 0.96 | 7.21E-01 | ZNF845                                          | intronic   |
| 18 | 5362279   | G | T | rs147190871            | 7.22E-01 | 0.048 | 0.050 | 0.97 | 0.67 | -1.42 | 5.68E-05 | 0.068 | 0.044 | 1.57 | 1.07 | -2.29 | 1.10 | 7.24E-01 | ZBTB14(dist=65227), EPB41L3(dist=30101)         | intergenic |
| 9  | 83512865  | G | A | rs7025618              | 7.21E-01 | 0.032 | 0.031 | 1.04 | 0.65 | -1.64 | 2.92E-05 | 0.047 | 0.028 | 1.69 | 1.08 | -2.66 | 1.13 | 7.24E-01 | LINC01507(dist=863395), TLE1(dist=685733)       | intergenic |
| 9  | 137940961 | C | A | rs73664018             | 5.43E-02 | 0.049 | 0.071 | 0.66 | 0.46 | -0.96 | 9.29E-06 | 0.074 | 0.041 | 1.86 | 1.29 | -2.69 | 1.06 | 7.25E-01 | FCN1(dist=131155), OLFM1(dist=26128)            | intergenic |
| 12 | 12130416  | C | T | rs78554624             | 7.27E-01 | 0.043 | 0.042 | 1.02 | 0.68 | -1.52 | 2.61E-08 | 0.046 | 0.022 | 2.09 | 1.31 | -3.32 | 1.09 | 7.26E-01 | RNU6-19P(dist=51309), BCL2L14(dist=93462)       | intergenic |
| 17 | 8301774   | A | T | rs73237243             | 7.32E-01 | 0.035 | 0.033 | 1.06 | 0.68 | -1.66 | 6.03E-05 | 0.049 | 0.028 | 1.81 | 1.16 | -2.82 | 1.10 | 7.28E-01 | RNF222                                          | intergenic |
| 19 | 55009217  | C | T | rs150717487            | 7.36E-01 | 0.034 | 0.037 | 0.91 | 0.58 | -1.43 | 4.65E-07 | 0.042 | 0.023 | 1.85 | 1.14 | -2.99 | 0.91 | 7.37E-01 | CDC42EP5(dist=24780), LAIR2(dist=4796)          | intergenic |
| 7  | 2387932   | G | A | rs115875957            | 7.44E-01 | 0.028 | 0.031 | 0.90 | 0.55 | -1.47 | 4.42E-05 | 0.033 | 0.021 | 1.59 | 0.93 | -2.71 | 0.90 | 7.43E-01 | SNX8(dist=33822), EIF3B(dist=6542)              | intergenic |
| 16 | 85478116  | G | C | rs78236852             | 7.41E-01 | 0.037 | 0.038 | 0.97 | 0.63 | -1.49 | 9.67E-08 | 0.044 | 0.024 | 1.87 | 1.17 | -2.99 | 1.09 | 7.44E-01 | MIR5093(dist=138185), GSE1(dist=166913)         | intergenic |
| 2  | 16976418  | C | T | rs183916901            | 7.45E-01 | 0.029 | 0.031 | 0.92 | 0.57 | -1.49 | 1.26E-06 | 0.051 | 0.029 | 1.82 | 1.18 | -2.82 | 0.90 | 7.46E-01 | FAM49A(dist=129284), RAD51AP2(dist=715568)      | intergenic |
| 19 | 53849920  | C | T | rs4803093              | 7.48E-01 | 0.227 | 0.235 | 1.04 | 0.86 | -1.27 | 9.53E-06 | 0.265 | 0.218 | 0.77 | 0.62 | -0.96 | 1.04 | 7.49E-01 | ZNF845                                          | intronic   |
| 16 | 86125423  | G | T | rs4074240              | 7.54E-01 | 0.093 | 0.087 | 1.08 | 0.82 | -1.43 | 1.45E-05 | 0.125 | 0.091 | 1.43 | 1.08 | -1.91 | 1.06 | 7.56E-01 | IRF8(dist=169212), LINC01082(dist=104364)       | intergenic |
| 17 | 44328224  | C | T | rs149491700            | 7.60E-01 | 0.044 | 0.050 | 0.89 | 0.6  | -1.31 | 5.77E-07 | 0.051 | 0.032 | 1.63 | 1.06 | -2.51 | 0.93 | 7.57E-01 | KANSL1(dist=25484), LRRCC37A(dist=44273)        | intergenic |
| 9  | 71839525  | A | G | rs7866592              | 7.58E-01 | 0.073 | 0.068 | 1.07 | 0.78 | -1.47 | 1.97E-05 | 0.106 | 0.076 | 1.43 | 1.05 | -1.95 | 1.07 | 7.60E-01 | TJP2                                            | intronic   |
| 11 | 17298277  | A | G | rs4757506              | 7.66E-01 | 0.160 | 0.162 | 0.99 | 0.79 | -1.24 | 4.14E-05 | 0.195 | 0.155 | 1.32 | 1.04 | -1.67 | 0.96 | 7.66E-01 | NUCB2                                           | upstream   |
| 19 | 13770369  | C | T | rs144707155            | 7.73E-01 | 0.039 | 0.040 | 0.98 | 0.65 | -1.49 | 5.19E-05 | 0.049 | 0.029 | 1.70 | 1.09 | -2.65 | 1.08 | 7.74E-01 | CACNA1A(dist=153095), CCDC130(dist=88384)       | intergenic |
| 8  | 11857206  | T | C | rs6996029              | 7.83E-01 | 0.071 | 0.077 | 0.92 | 0.67 | -1.26 | 2.50E-06 | 0.107 | 0.072 | 1.53 | 1.12 | -2.08 | 0.94 | 7.80E-01 | DEFB134                                         | intronic   |
| 4  | 7189273   | G | A | rs7654148              | 7.81E-01 | 0.027 | 0.029 | 0.93 | 0.57 | -1.54 | 7.06E-06 | 0.034 | 0.020 | 1.68 | 0.99 | -2.86 | 0.91 | 7.81E-01 | FLJ36777(dist=84170), SORCS2(dist=5101)         | intergenic |
| 7  | 87667080  | A | G | rs139928983            | 7.87E-01 | 0.027 | 0.028 | 0.94 | 0.57 | -1.56 | 6.48E-06 | 0.043 | 0.025 | 1.73 | 1.08 | -2.78 | 0.91 | 7.86E-01 | ADAM22                                          | intronic   |
| 17 | 79387492  | C | G | rs6565566              | 7.89E-01 | 0.047 | 0.050 | 1.07 | 0.73 | -1.57 | 2.45E-06 | 0.065 | 0.042 | 0.64 | 0.43 | -0.94 | 1.07 | 7.86E-01 | BAHCC1                                          | intronic   |
| 2  | 234698348 | A | G | rs73999046             | 9.33E-02 | 0.026 | 0.040 | 0.64 | 0.39 | -1.05 | 4.93E-05 | 0.041 | 0.021 | 2.05 | 1.26 | -3.33 | 1.06 | 7.88E-01 | MROH2A                                          | intronic   |
| 5  | 171079142 | T | G | rs567906               | 7.84E-01 | 0.047 | 0.049 | 0.95 | 0.64 | -1.39 | 3.59E-17 | 0.059 | 0.029 | 2.10 | 1.39 | -3.16 | 0.94 | 7.89E-01 | FGF18(dist=194512), SMIM23(dist=133734)         | intergenic |
| 9  | 128909409 | A | G | rs115257377            | 1.77E-02 | 0.019 | 0.036 | 0.53 | 0.3  | -0.93 | 2.74E-05 | 0.044 | 0.024 | 1.86 | 1.17 | -2.96 | 0.94 | 7.98E-01 | PBX3(dist=179754), LOC101929116(dist=122994)    | intergenic |
| 17 | 749026    | G | A | rs111942842            | 8.02     |       |       |      |      |       |          |       |       |      |      |       |      |          |                                                 |            |



|    |           |   |   |                       |          |       |       |      |      |       |          |       |       |      |      |       |      |          |                                                   |              |
|----|-----------|---|---|-----------------------|----------|-------|-------|------|------|-------|----------|-------|-------|------|------|-------|------|----------|---------------------------------------------------|--------------|
| 19 | 53850614  | T | C | rs4803094             | 8.17E-01 | 0.216 | 0.222 | 1.03 | 0.85 | -1.26 | 1.94E-06 | 0.252 | 0.204 | 0.76 | 0.61 | -0.94 | 1.03 | 8.18E-01 | ZNF845                                            | intronic     |
| 8  | 11887883  | C | T | rs148742085           | 8.23E-01 | 0.101 | 0.104 | 0.97 | 0.74 | -1.26 | 5.35E-05 | 0.132 | 0.097 | 1.42 | 1.07 | -1.88 | 1.04 | 8.21E-01 | DEFB134(dist=29622), DEFB130(dist=34015)          | intergenic   |
| 1  | 213324275 | C | T | rs182654659           | 8.21E-01 | 0.023 | 0.022 | 1.03 | 0.6  | -1.79 | 1.43E-05 | 0.037 | 0.024 | 1.55 | 0.93 | -2.57 | 1.10 | 8.24E-01 | RPS6KC1                                           | intronic     |
| 19 | 55025272  | C | A | rs141847247           | 8.27E-01 | 0.031 | 0.033 | 0.93 | 0.58 | -1.49 | 4.14E-05 | 0.033 | 0.022 | 1.51 | 0.89 | -2.57 | 0.94 | 8.28E-01 | LAIR2(dist=3372), KIR3DX1(dist=18637)             | intergenic   |
| 11 | 78919189  | T | G | rs11237761            | 8.31E-01 | 0.025 | 0.023 | 1.06 | 0.63 | -1.81 | 2.80E-07 | 0.039 | 0.024 | 1.63 | 0.99 | -2.66 | 1.07 | 8.30E-01 | TENM4                                             | intronic     |
| 19 | 55023885  | G | A | rs115568946           | 8.31E-01 | 0.030 | 0.032 | 0.93 | 0.58 | -1.5  | 3.18E-05 | 0.033 | 0.022 | 1.52 | 0.89 | -2.57 | 0.94 | 8.32E-01 | LAIR2(dist=1985), KIR3DX1(dist=20024)             | intergenic   |
| 15 | 81751999  | T | A | rs191939415           | 8.36E-01 | 0.021 | 0.022 | 0.95 | 0.54 | -1.68 | 1.75E-05 | 0.033 | 0.022 | 1.54 | 0.91 | -2.61 | 0.93 | 8.36E-01 | TMC3-AS1(dist=16582), MEX3B(dist=582120)          | intergenic   |
| 11 | 3221404   | C | G | rs139742421           | 8.38E-01 | 0.022 | 0.025 | 0.87 | 0.51 | -1.51 | 1.15E-05 | 0.036 | 0.022 | 1.70 | 1.02 | -2.84 | 0.93 | 8.37E-01 | OSBPL5(dist=34822), MRGPRG(dist=17770)            | intergenic   |
| 21 | 44036352  | G | C | rs575885902;rs7281783 | 8.35E-01 | 0.024 | 0.023 | 1.03 | 0.6  | -1.75 | 5.83E-06 | 0.037 | 0.020 | 1.86 | 1.12 | -3.1  | 1.08 | 8.39E-01 | SLC37A1(dist=34802), PDE9A(dist=37510)            | intergenic   |
| 7  | 1317394   | C | A | rs73670574            | 8.42E-01 | 0.043 | 0.044 | 0.98 | 0.66 | -1.47 | 4.70E-05 | 0.060 | 0.039 | 1.57 | 1.05 | -2.35 | 1.06 | 8.41E-01 | UNCX(dist=40781), MICALL2(dist=156601)            | intergenic   |
| 3  | 134831574 | T | C | rs7374312             | 8.45E-01 | 0.038 | 0.037 | 0.99 | 0.65 | -1.52 | 2.40E-05 | 0.050 | 0.032 | 1.62 | 0.4  | -0.96 | 1.06 | 8.45E-01 | EPHB1                                             | intronic     |
| 15 | 34718328  | T | C | rs349635              | 8.46E-01 | 0.027 | 0.029 | 0.92 | 0.56 | -1.51 | 2.47E-05 | 0.038 | 0.026 | 1.46 | 0.89 | -2.4  | 0.94 | 8.47E-01 | NONE(dist=NONE), NONE(dist=NONE)                  | intergenic   |
| 12 | 6524444   | C | T | rs143209959           | 8.48E-01 | 0.056 | 0.062 | 0.90 | 0.63 | -1.28 | 3.09E-05 | 0.050 | 0.031 | 1.62 | 1.05 | -2.52 | 0.97 | 8.48E-01 | LTBR(dist=23707), CD27-AS1(dist=292723)           | intergenic   |
| 18 | 56922852  | A | G | rs145981817           | 8.48E-01 | 0.185 | 0.186 | 1.01 | 0.82 | -1.25 | 4.71E-05 | 0.247 | 0.200 | 0.76 | 0.61 | -0.95 | 1.03 | 8.49E-01 | GRP(dist=24850), RAX(dist=11415)                  | intergenic   |
| 17 | 66070117  | G | A | rs149902579           | 8.51E-01 | 0.038 | 0.039 | 0.98 | 0.64 | -1.49 | 6.90E-08 | 0.057 | 0.031 | 1.89 | 1.25 | -2.85 | 1.06 | 8.49E-01 | KPNA2(dist=27147), LINC00674(dist=27579)          | intergenic   |
| 10 | 24757675  | A | G | rs74506538            | 8.46E-01 | 0.045 | 0.045 | 1.00 | 0.68 | -1.48 | 1.18E-05 | 0.045 | 0.026 | 1.80 | 1.13 | -2.85 | 1.05 | 8.50E-01 | KIAA1217                                          | intronic     |
| 12 | 6528195   | A | G | rs76895489            | 8.54E-01 | 0.054 | 0.059 | 0.90 | 0.63 | -1.29 | 1.01E-05 | 0.051 | 0.032 | 1.63 | 1.06 | -2.52 | 0.96 | 8.54E-01 | LTBR(dist=27458), CD27-AS1(dist=19972)            | intergenic   |
| 11 | 44471692  | G | A | rs112427129           | 8.55E-01 | 0.032 | 0.032 | 1.00 | 0.63 | -1.59 | 1.39E-05 | 0.051 | 0.036 | 1.44 | 0.93 | -2.2  | 0.95 | 8.55E-01 | ALX4(dist=139976), CD82(dist=115449)              | intergenic   |
| 16 | 60083017  | A | G | rs4784102;rs386791336 | 8.62E-01 | 0.025 | 0.025 | 0.99 | 0.59 | -1.67 | 1.79E-06 | 0.046 | 0.031 | 1.53 | 0.97 | -2.41 | 0.94 | 8.63E-01 | LOC101927580                                      | ncRNA_exonic |
| 5  | 2893293   | T | C | rs146148149           | 8.70E-01 | 0.032 | 0.031 | 1.02 | 0.64 | -1.63 | 1.81E-05 | 0.036 | 0.021 | 1.76 | 1.05 | -2.95 | 1.04 | 8.73E-01 | C5orf38(dist=137782), LINC01377(dist=284656)      | intergenic   |
| 17 | 35286520  | C | T | rs77485712            | 8.75E-01 | 0.029 | 0.029 | 0.98 | 0.6  | -1.6  | 1.99E-05 | 0.041 | 0.024 | 1.71 | 1.05 | -2.77 | 1.05 | 8.74E-01 | MRM1(dist=321113), LHX1(dist=8252)                | intergenic   |
| 2  | 222046341 | A | T | rs188832927           | 8.77E-01 | 0.179 | 0.185 | 0.96 | 0.78 | -1.19 | 1.11E-05 | 0.209 | 0.162 | 1.36 | 1.08 | -1.72 | 0.98 | 8.78E-01 | MIR4268(dist=1275055), EPHA4(dist=236406)         | intergenic   |
| 9  | 8940693   | C | T | rs16928642            | 8.79E-01 | 0.028 | 0.029 | 0.96 | 0.59 | -1.58 | 5.08E-05 | 0.048 | 0.028 | 1.71 | 1.09 | -2.69 | 0.96 | 8.80E-01 | PTPRD                                             | intronic     |
| 1  | 18568481  | G | A | rs77068056            | 8.79E-01 | 0.024 | 0.025 | 0.97 | 0.58 | -1.64 | 2.98E-06 | 0.034 | 0.020 | 1.74 | 1.03 | -2.94 | 1.06 | 8.81E-01 | IGSF21                                            | intronic     |
| 19 | 1872571   | A | G | rs114802700           | 8.81E-01 | 0.044 | 0.048 | 0.92 | 0.62 | -1.36 | 4.51E-05 | 0.039 | 0.026 | 1.51 | 0.92 | -2.47 | 0.96 | 8.81E-01 | KLF16(dist=9007), ABHD17A(dist=4404)              | intergenic   |
| 17 | 76302044  | T | C | rs906561              | 8.84E-01 | 0.033 | 0.032 | 0.98 | 0.62 | -1.55 | 1.38E-05 | 0.064 | 0.051 | 0.77 | 0.53 | -1.14 | 1.04 | 8.82E-01 | LOC10096291(dist=27471), SOCS3(dist=50814)        | intergenic   |
| 12 | 6532692   | C | T | rs59724675            | 8.85E-01 | 0.055 | 0.061 | 0.91 | 0.64 | -1.29 | 2.93E-06 | 0.050 | 0.031 | 1.65 | 1.07 | -2.55 | 0.97 | 8.85E-01 | LTBR(dist=31955), CD27-AS1(dist=15475)            | intergenic   |
| 12 | 6528733   | G | T | rs78217307            | 8.88E-01 | 0.055 | 0.060 | 0.91 | 0.64 | -1.29 | 1.00E-05 | 0.051 | 0.032 | 1.63 | 1.06 | -2.52 | 0.97 | 8.87E-01 | LTBR(dist=27996), CD27-AS1(dist=19434)            | intergenic   |
| 12 | 6528959   | G | A | rs115336441           | 8.88E-01 | 0.055 | 0.060 | 0.91 | 0.64 | -1.29 | 1.03E-05 | 0.051 | 0.032 | 1.63 | 1.06 | -2.52 | 0.97 | 8.88E-01 | LTBR(dist=28222), CD27-AS1(dist=19208)            | intergenic   |
| 14 | 97526784  | A | T | rs186922178           | 8.87E-01 | 0.020 | 0.021 | 0.93 | 0.52 | -1.67 | 5.74E-05 | 0.036 | 0.020 | 1.81 | 1.08 | -3.03 | 0.94 | 8.89E-01 | LINC00618(dist=115053), LOC101929241(dist=398369) | intergenic   |
| 6  | 107325444 | G | A | rs114596973           | 8.84E-01 | 0.040 | 0.041 | 0.99 | 0.66 | -1.5  | 5.46E-06 | 0.046 | 0.025 | 1.87 | 1.18 | -2.95 | 1.04 | 8.90E-01 | LOC100422737(dist=90144), C6orf203(dist=23932)    | intergenic   |
| 19 | 53849869  | G | A | rs4803092             | 8.94E-01 | 0.211 | 0.215 | 1.03 | 0.84 | -1.25 | 2.89E-06 | 0.250 | 0.201 | 0.75 | 0.61 | -0.94 | 1.02 | 8.94E-01 | ZNF845                                            | intronic     |
| 12 | 6532939   | A | G | rs75339490            | 8.95E-01 | 0.053 | 0.058 | 0.90 | 0.63 | -1.3  | 6.08E-08 | 0.053 | 0.032 | 1.71 | 1.12 | -2.62 | 0.97 | 8.95E-01 | LTBR(dist=32202), CD27-AS1(dist=15228)            | intergenic   |
| 11 | 3244708   | G | A | rs141612724           | 8.99E-01 | 0.027 | 0.030 | 0.90 | 0.54 | -1.48 | 6.09E-06 | 0.038 | 0.024 | 1.61 | 0.98 | -2.65 | 0.96 | 8.98E-01 | MRGPRG-AS1                                        | downstream   |
| 10 | 675037    | G | A | rs150271184           | 8.96E-01 | 0.027 | 0.027 | 0.98 | 0.59 | -1.62 | 5.42E-05 | 0.036 | 0.021 | 1.78 | 1.07 | -2.96 | 1.04 | 8.99E-01 | DIP2C                                             | intergenic   |
| 6  | 9117577   | T | A | rs13220860            | 8.97E-01 | 0.036 | 0.033 | 1.09 | 0.7  | -1.7  | 1.51E-05 | 0.059 | 0.043 | 1.40 | 0.93 | -2.09 | 1.04 | 9.02E-01 | LOC100506207(dist=331899), TFAP2A(dist=1279339)   | intergenic   |
| 11 | 12159062  | T | G | rs57662553            | 9.03E-01 | 0.030 | 0.031 | 0.96 | 0.6  | -1.55 | 1.27E-06 | 0.049 | 0.032 | 1.57 | 1.01 | -2.44 | 1.04 | 9.03E-01 | MICAL2                                            | intronic     |
| 6  | 107322038 | G | A | rs114085968           | 8.99E-01 | 0.037 | 0.039 | 0.94 | 0.61 | -1.45 | 4.83E-05 | 0.043 | 0.025 | 1.79 | 1.12 | -2.87 | 0.97 | 9.04E-01 | LOC100422737(dist=86738), C6orf203(dist=27338)    | intergenic   |
| 21 | 40996943  | G | A | rs73904081            | 9.04E-01 | 0.083 | 0.081 | 1.03 | 0.77 | -1.38 | 1.51E-05 | 0.106 | 0.076 | 1.45 | 1.07 | -1.97 | 1.02 | 9.06E-01 | B3GALT5                                           | intronic     |
| 1  | 237233883 | T | C | rs77802293            | 9.06E-01 | 0.025 | 0.027 | 0.92 | 0.55 | -1.54 | 2.87E-05 | 0.042 | 0.025 | 1.72 | 1.07 | -2.78 | 0.96 | 9.08E-01 | RYR2                                              | intronic     |
| 6  | 107322075 | T | C | rs141462656           | 9.04E-01 | 0.038 | 0.040 | 0.94 | 0.62 | -1.45 | 2.44E-05 | 0.044 | 0.025 | 1.80 | 1.13 | -2.86 | 0.97 | 9.08E-01 | LOC100422737(dist=86775), C6orf203(dist=27301)    | intergenic   |
| 6  | 9122755   | C | T | rs78954827            | 9.05E-01 | 0.036 | 0.033 | 1.09 | 0.7  | -1.7  | 8.90E-06 | 0.058 | 0.042 | 1.40 | 0.93 | -2.09 | 1.03 | 9.09E-01 | LOC100506207(dist=337077), TFAP2A(dist=1274161)   | intergenic   |
| 2  | 16974400  | A | G | rs139459531           | 9.11E-01 | 0.023 | 0.023 | 0.97 | 0.56 | -1.68 | 4.25E-06 | 0.048 | 0.025 | 1.98 | 1.26 | -3.11 | 1.04 | 9.12E-01 | FAM49A(dist=127266), RAD51AP2(dist=717586)        | intergenic   |
| 14 | 99647890  | C | A | rs710306              | 9.12E-01 | 0.079 | 0.073 | 0.92 | 0.68 | -1.25 | 6.12E-05 | 0.113 | 0.094 | 0.81 | 0.6  | -1.09 | 0.98 | 9.14E-01 | BCL11B                                            | intronic     |
| 2  | 16974386  | T | C | rs150522760           | 9.14E-01 | 0.022 | 0.023 | 0.97 | 0.56 | -1.69 | 2.24E-06 | 0.047 | 0.024 | 2.01 | 1.28 | -3.17 | 1.04 | 9.14E-01 | FAM49A(dist=127252), RAD51AP2(dist=717600)        | intergenic   |
| 2  | 16974432  | C | A | rs183783692           | 9.14E-01 | 0.022 | 0.023 | 0.97 | 0.56 | -1.69 | 2.24E-06 | 0.047 | 0.024 | 2.01 | 1.27 | -3.17 | 1.04 | 9.15E-01 | FAM49A(dist=127298), RAD51AP2(dist=717554)        | intergenic   |
| 15 | 34732481  | T | C | rs145442028           | 9.17E-01 | 0.029 | 0.031 | 0.93 | 0.58 | -1.51 | 8.13E-06 | 0.041 | 0.028 | 1.48 | 0.92 | -2.38 | 0.97 | 9.17E-01 | NONE(dist=NONE), GOLGA8B(dist=85003)              | intergenic   |
| 6  | 24359182  | T | C | rs111218737           | 9.13E-01 | 0.204 | 0.203 | 1.00 | 0.82 | -1.23 | 2.10E-05 | 0.147 | 0.203 | 0.68 | 0.52 | -0.88 | 1.02 | 9.17E-01 | CCDC2                                             | intronic     |
| 15 | 34731053  | C | T | rs150865979           | 9.17E-01 | 0.030 | 0.032 | 0.94 | 0.58 | -1.51 | 1.08E-05 | 0.042 | 0.029 | 1.47 | 0.91 | -2.36 | 0.97 | 9.17E-01 | NONE(dist=NONE), GOLGA8B(dist=86431)              | intergenic   |
| 8  | 17560910  | T | A | rs7386823             | 9.23E-01 | 0.040 | 0.040 | 1.00 | 0.66 | -1.52 | 1.36E-06 | 0.052 | 0.029 | 0.55 | 0.36 | -0.84 | 0.98 | 9.22E-01 | MTUS1                                             | intronic     |
| 19 | 53851439  | A | G | rs8102481             | 9.22E-01 | 0.212 | 0.216 | 1.02 | 0.84 | -1.25 | 1.46E-06 | 0.246 | 0.197 | 0.75 | 0.61 | -0.94 | 1.01 | 9.22E-01 | ZNF845                                            | intronic     |
| 4  | 6768819   | C | T | rs56200788            | 9.22E-01 | 0.049 | 0.050 | 0.98 | 0.67 | -1.43 | 4.53E-05 | 0.062 | 0.038 | 1.65 | 1.11 | -2.45 | 1.02 | 9.22E-01 | BLOC1S4(dist=49432), KIAA0232(dist=15640)         | intergenic   |
| 10 | 121121412 | G | A | rs4752296             | 9.26E-01 | 0.034 | 0.035 | 0.98 | 0.63 | -1.54 | 7.74E-06 | 0.047 | 0.027 | 1.80 | 1.15 | -2.83 | 1.03 | 9.28E-01 | GRK5                                              | intronic     |
| 1  | 151538366 | G | A | rs3790506             | 9.27E-01 | 0.125 | 0.116 | 1.09 | 0.85 | -1.4  | 3.12E-06 | 0.186 | 0.139 | 1.42 | 1.11 | -1.8  | 1.02 | 9.28E-01 | TUFT1                                             | intronic     |
| 11 | 117035816 | C | T | rs144037495           | 9.33E-01 | 0.025 | 0.024 | 1.03 | 0.61 | -1.74 | 6.40E-05 | 0.042 | 0.021 | 2.05 | 1.26 | -3.32 | 0.97 | 9.32E-01 | PAFAH1B2                                          | intronic     |
| 16 | 81177307  | G | A | rs78914852            | 9.34E-01 | 0.031 | 0.031 | 1.01 | 0.63 | -1.61 | 1.60E-05 | 0.063 | 0.039 | 1.64 | 1.11 | -2.43 | 0.98 | 9.34E-01 | PKD1L2                                            | intronic     |
| 16 | 83965094  | G | T | rs148719447           | 9.36E-01 | 0.028 | 0     |      |      |       |          |       |       |      |      |       |      |          |                                                   |              |

|    |           |   |   |             |          |       |       |      |      |       |          |       |       |      |      |       |      |          |                                                     |            |
|----|-----------|---|---|-------------|----------|-------|-------|------|------|-------|----------|-------|-------|------|------|-------|------|----------|-----------------------------------------------------|------------|
| 19 | 42519235  | T | C | rs111971846 | 9.53E-01 | 0.023 | 0.024 | 0.97 | 0.56 | -1.67 | 4.65E-06 | 0.034 | 0.021 | 1.66 | 0.98 | -2.83 | 0.98 | 9.53E-01 | GRIK5                                               | intronic   |
| 19 | 53850179  | T | C | rs6509747   | 9.54E-01 | 0.221 | 0.222 | 1.01 | 0.83 | -1.22 | 2.59E-06 | 0.257 | 0.209 | 0.76 | 0.61 | -0.94 | 0.99 | 9.54E-01 | ZNF845                                              | intronic   |
| 7  | 13640280  | A | G | rs141624195 | 3.30E-02 | 0.039 | 0.059 | 0.65 | 0.43 | -0.98 | 2.46E-05 | 0.064 | 0.037 | 1.76 | 1.19 | -2.61 | 1.01 | 9.54E-01 | ARL4A(dist=909722), ETV1(dist=290576)               | intergenic |
| 15 | 26656713  | T | C | rs11632570  | 9.58E-01 | 0.373 | 0.372 | 1.00 | 0.84 | -1.18 | 4.08E-05 | 0.337 | 0.395 | 1.28 | 1.05 | -1.56 | 1.01 | 9.58E-01 | LINC00929(dist=278529), GABRB3(dist=131981)         | intergenic |
| 16 | 83963096  | C | T | rs138126554 | 9.65E-01 | 0.028 | 0.030 | 0.94 | 0.58 | -1.54 | 7.52E-08 | 0.040 | 0.021 | 1.92 | 1.18 | -3.13 | 0.99 | 9.65E-01 | MLYCD(dist=13309), OSGIN1(dist=23731)               | intergenic |
| 7  | 104407521 | C | T | rs4730042   | 9.66E-01 | 0.023 | 0.024 | 0.97 | 0.56 | -1.67 | 5.27E-05 | 0.047 | 0.031 | 1.57 | 1    | -2.46 | 0.98 | 9.66E-01 | LHFPL3                                              | intronic   |
| 19 | 13472795  | C | A | rs116085161 | 9.70E-01 | 0.037 | 0.038 | 0.97 | 0.63 | -1.49 | 3.96E-05 | 0.051 | 0.030 | 1.72 | 1.11 | -2.65 | 1.01 | 9.70E-01 | CACNA1A                                             | intronic   |
| 11 | 111162181 | T | C | rs116444723 | 9.73E-01 | 0.046 | 0.046 | 1.00 | 0.67 | -1.47 | 6.05E-05 | 0.050 | 0.034 | 1.49 | 0.96 | -2.3  | 1.01 | 9.73E-01 | C11orf53(dist=5052), COLCA1(dist=1933)              | intergenic |
| 16 | 83964828  | C | G | rs146022777 | 9.76E-01 | 0.028 | 0.029 | 0.95 | 0.58 | -1.56 | 6.87E-08 | 0.040 | 0.021 | 1.91 | 1.17 | -3.12 | 0.99 | 9.76E-01 | MLYCD(dist=15041), OSGIN1(dist=21999)               | intergenic |
| 6  | 26340271  | A | G | rs114618338 | 9.82E-01 | 0.039 | 0.040 | 0.98 | 0.64 | -1.49 | 4.25E-14 | 0.057 | 0.028 | 2.08 | 1.37 | -3.16 | 0.99 | 9.83E-01 | HIST1H4H(dist=54544), BTN3A2(dist=25116)            | intergenic |
| 19 | 53850160  | G | A | rs8112602   | 9.83E-01 | 0.220 | 0.222 | 1.01 | 0.83 | -1.23 | 2.92E-06 | 0.257 | 0.209 | 0.76 | 0.61 | -0.94 | 1.00 | 9.83E-01 | ZNF845                                              | intronic   |
| 8  | 12713928  | G | A | rs73538865  | 9.84E-01 | 0.025 | 0.026 | 0.95 | 0.57 | -1.6  | 3.52E-07 | 0.044 | 0.023 | 1.91 | 1.2  | -3.07 | 0.99 | 9.84E-01 | LINC00681(dist=38128), KIAA1456(dist=89255)         | intergenic |
| 4  | 171236615 | A | T | rs114469389 | 9.85E-01 | 0.025 | 0.023 | 1.08 | 0.64 | -1.83 | 5.36E-05 | 0.047 | 0.032 | 1.48 | 0.94 | -2.31 | 1.01 | 9.85E-01 | LOC101928223(dist=31742), LOC100506122(dist=725138) | intergenic |
| 19 | 53849750  | G | A | rs4801978   | 9.88E-01 | 0.194 | 0.195 | 1.01 | 0.82 | -1.24 | 4.72E-06 | 0.228 | 0.182 | 0.75 | 0.6  | -0.94 | 1.00 | 9.89E-01 | ZNF845                                              | intronic   |
| 10 | 121121244 | G | A | rs4752295   | 9.88E-01 | 0.031 | 0.032 | 0.97 | 0.61 | -1.56 | 4.98E-08 | 0.045 | 0.024 | 1.95 | 1.23 | -3.11 | 1.00 | 9.89E-01 | GRK5                                                | intronic   |
| 20 | 57316025  | G | T | rs73915931  | 9.92E-01 | 0.026 | 0.027 | 0.95 | 0.57 | -1.58 | 6.33E-05 | 0.037 | 0.023 | 1.63 | 0.99 | -2.7  | 1.00 | 9.92E-01 | STX16-NPEPL1(dist=25125), MIR296(dist=76645)        | intergenic |
| 19 | 53849446  | G | A | rs4803089   | 9.95E-01 | 0.176 | 0.178 | 1.01 | 0.82 | -1.25 | 2.61E-05 | 0.205 | 0.164 | 0.76 | 0.6  | -0.96 | 1.00 | 9.95E-01 | ZNF845                                              | intronic   |
| 19 | 53849700  | G | A | rs4803090   | 9.96E-01 | 0.195 | 0.197 | 1.01 | 0.82 | -1.24 | 7.76E-06 | 0.229 | 0.184 | 0.76 | 0.6  | -0.95 | 1.00 | 9.96E-01 | ZNF845                                              | intronic   |

Results for all association with p-values < 6.5x10<sup>-5</sup> in GWAS1 and GWAS2 for UC. Suggestive SNPs at established European loci (specifically <1 Mb of the maximal reported associations) for UC are indicated in bold.

Supplementary Table 1: Suggestive SNPs at established European loci (specifically <1 Mb of the maximal reported associations) for IBD are indicated in bold

| Chr | Position  | A1 | A2 | SNP Name               | GWAS1 (Omni2.5) |           |              |      |             | GWAS2 (Axiom) |           |              |      |             | Combined |          | nearest_gene(s)                               | Annotation     |
|-----|-----------|----|----|------------------------|-----------------|-----------|--------------|------|-------------|---------------|-----------|--------------|------|-------------|----------|----------|-----------------------------------------------|----------------|
|     |           |    |    |                        | P_value         | Case_Freq | Control_Freq | OR   | OR_CI       | P_Value       | Case_Freq | Control_Freq | OR   | OR_CI       | OR       | P-value  |                                               |                |
| 5   | 124293144 | T  | C  | rs386692020;rs73782531 | 1.56E-16        | 0.013     | 0.056        | 0.22 | 0.15 - 0.33 | 6.26E-01      | 0.043     | 0.044        | 0.98 | 0.76 - 1.26 | 0.54     | 8.51E-09 | ZNF608(dist=212339), LOC101927421(dist=79380) | intergenic     |
| 21  | 16800087  | C  | T  | rs7278277              | 1.60E-04        | 0.530     | 0.473        | 0.80 | 0.71 - 0.89 | 1.21E-05      | 0.513     | 0.476        | 0.86 | 0.78 - 0.96 | 0.77     | 1.99E-08 | NRIP1(dist=362961), USP25(dist=302257)        | intergenic     |
| 5   | 40424426  | A  | C  | rs6896969              | 4.09E-04        | 0.340     | 0.387        | 1.22 | 1.09 - 1.37 | 2.85E-05      | 0.335     | 0.391        | 1.27 | 1.14 - 1.42 | 1.25     | 7.81E-08 | LINC00603(dist=371000), PTGER4(dist=255606)   | intergenic     |
| 5   | 40426420  | G  | T  | rs957100               | 3.46E-04        | 0.339     | 0.387        | 1.23 | 1.09 - 1.38 | 3.58E-05      | 0.336     | 0.390        | 1.27 | 1.13 - 1.41 | 1.25     | 8.04E-08 | LINC00603(dist=372994), PTGER4(dist=253612)   | intergenic     |
| 5   | 40425190  | T  | G  | rs6879489              | 3.79E-04        | 0.340     | 0.387        | 1.23 | 1.09 - 1.37 | 3.83E-05      | 0.337     | 0.391        | 1.26 | 1.13 - 1.41 | 1.25     | 9.38E-08 | LINC00603(dist=371764), PTGER4(dist=254842)   | intergenic     |
| 5   | 40423280  | G  | A  | rs7730591              | 4.09E-04        | 0.340     | 0.387        | 1.22 | 1.09 - 1.37 | 3.53E-05      | 0.336     | 0.390        | 1.27 | 1.14 - 1.41 | 1.25     | 9.41E-08 | LINC00603(dist=369854), PTGER4(dist=256752)   | intergenic     |
| 6   | 32594240  | T  | A  | rs139282044            | 5.48E-05        | 0.050     | 0.031        | 1.67 | 1.26 - 2.21 | 1.74E-04      | 0.038     | 0.022        | 1.76 | 1.31 - 2.36 | 1.93     | 9.43E-08 | HLA-DRB1(dist=36627), HLA-DQA1(dist=10943)    | intergenic     |
| 5   | 40406130  | T  | A  | rs6871591              | 3.40E-04        | 0.342     | 0.390        | 1.23 | 1.1 - 1.38  | 4.37E-05      | 0.336     | 0.389        | 1.26 | 1.13 - 1.41 | 1.25     | 9.46E-08 | LINC00603(dist=352704), PTGER4(dist=273902)   | intergenic     |
| 5   | 40415067  | C  | T  | rs1992660              | 3.48E-04        | 0.339     | 0.387        | 1.23 | 1.1 - 1.38  | 4.26E-05      | 0.335     | 0.389        | 1.26 | 1.13 - 1.41 | 1.25     | 9.47E-08 | LINC00603(dist=361641), PTGER4(dist=264965)   | intergenic     |
| 5   | 40425701  | G  | T  | rs6451498              | 4.11E-04        | 0.340     | 0.387        | 1.22 | 1.09 - 1.37 | 3.55E-05      | 0.336     | 0.390        | 1.27 | 1.13 - 1.41 | 1.24     | 9.51E-08 | LINC00603(dist=372275), PTGER4(dist=254331)   | intergenic     |
| 5   | 40419143  | G  | C  | rs114400949            | 4.21E-04        | 0.341     | 0.387        | 1.22 | 1.09 - 1.37 | 3.47E-05      | 0.336     | 0.391        | 1.27 | 1.14 - 1.41 | 1.25     | 9.54E-08 | LINC00603(dist=365717), PTGER4(dist=260889)   | intergenic     |
| 5   | 40420666  | C  | G  | rs7705462              | 4.33E-04        | 0.341     | 0.387        | 1.22 | 1.09 - 1.37 | 3.38E-05      | 0.336     | 0.390        | 1.27 | 1.14 - 1.41 | 1.24     | 9.58E-08 | LINC00603(dist=367240), PTGER4(dist=259366)   | intergenic     |
| 9   | 117811778 | C  | T  | rs114032850            | 3.14E-05        | 0.066     | 0.042        | 1.61 | 1.26 - 2.05 | 4.00E-04      | 0.063     | 0.041        | 1.56 | 1.24 - 1.95 | 1.65     | 9.59E-08 | TNC                                           | intronic       |
| 5   | 40422938  | A  | C  | rs6876242              | 4.24E-04        | 0.340     | 0.387        | 1.22 | 1.09 - 1.37 | 3.49E-05      | 0.336     | 0.391        | 1.27 | 1.14 - 1.41 | 1.24     | 9.67E-08 | LINC00603(dist=369512), PTGER4(dist=257094)   | intergenic     |
| 5   | 40417841  | C  | T  | rs2371720              | 4.32E-04        | 0.341     | 0.387        | 1.22 | 1.09 - 1.37 | 3.43E-05      | 0.336     | 0.390        | 1.27 | 1.14 - 1.41 | 1.24     | 9.70E-08 | LINC00603(dist=364415), PTGER4(dist=262191)   | intergenic     |
| 5   | 40406050  | A  | T  | rs6890268              | 3.54E-04        | 0.340     | 0.387        | 1.23 | 1.1 - 1.38  | 4.49E-05      | 0.335     | 0.389        | 1.26 | 1.13 - 1.41 | 1.24     | 1.01E-07 | LINC00603(dist=352624), PTGER4(dist=273982)   | intergenic     |
| 5   | 40412944  | T  | A  | rs10473191             | 3.40E-04        | 0.339     | 0.387        | 1.23 | 1.1 - 1.38  | 4.88E-05      | 0.335     | 0.389        | 1.26 | 1.13 - 1.41 | 1.24     | 1.04E-07 | LINC00603(dist=359518), PTGER4(dist=267088)   | intergenic     |
| 5   | 40410584  | T  | C  | rs11742570             | 3.38E-04        | 0.339     | 0.387        | 1.23 | 1.1 - 1.38  | 4.95E-05      | 0.335     | 0.389        | 1.26 | 1.13 - 1.41 | 1.24     | 1.05E-07 | LINC00603(dist=357158), PTGER4(dist=269448)   | intergenic     |
| 5   | 40412466  | A  | G  | rs6888952              | 3.40E-04        | 0.339     | 0.387        | 1.23 | 1.1 - 1.38  | 4.93E-05      | 0.335     | 0.389        | 1.26 | 1.13 - 1.41 | 1.24     | 1.05E-07 | LINC00603(dist=359040), PTGER4(dist=267566)   | intergenic     |
| 5   | 40418264  | T  | G  | rs6873829              | 3.99E-04        | 0.341     | 0.388        | 1.22 | 1.09 - 1.37 | 4.12E-05      | 0.340     | 0.394        | 1.26 | 1.13 - 1.41 | 1.24     | 1.05E-07 | LINC00603(dist=364838), PTGER4(dist=261768)   | intergenic     |
| 5   | 40412195  | T  | C  | rs12655810             | 3.40E-04        | 0.339     | 0.387        | 1.23 | 1.1 - 1.38  | 4.94E-05      | 0.335     | 0.389        | 1.26 | 1.13 - 1.41 | 1.24     | 1.06E-07 | LINC00603(dist=358769), PTGER4(dist=267837)   | intergenic     |
| 5   | 40411910  | A  | G  | rs6883964              | 3.40E-04        | 0.339     | 0.387        | 1.23 | 1.1 - 1.38  | 4.95E-05      | 0.335     | 0.389        | 1.26 | 1.13 - 1.41 | 1.24     | 1.06E-07 | LINC00603(dist=358484), PTGER4(dist=268122)   | intergenic     |
| 5   | 40410935  | G  | T  | rs6451493              | 3.40E-04        | 0.339     | 0.387        | 1.23 | 1.1 - 1.38  | 4.96E-05      | 0.335     | 0.389        | 1.26 | 1.13 - 1.41 | 1.24     | 1.06E-07 | LINC00603(dist=357509), PTGER4(dist=269097)   | intergenic     |
| 5   | 40419949  | C  | G  | rs10473192             | 4.56E-04        | 0.341     | 0.387        | 1.22 | 1.09 - 1.37 | 3.61E-05      | 0.339     | 0.393        | 1.26 | 1.13 - 1.41 | 1.24     | 1.07E-07 | LINC00603(dist=366523), PTGER4(dist=260083)   | intergenic     |
| 5   | 40411291  | T  | C  | rs6451494              | 3.35E-04        | 0.339     | 0.387        | 1.23 | 1.1 - 1.38  | 5.25E-05      | 0.336     | 0.389        | 1.26 | 1.13 - 1.41 | 1.24     | 1.10E-07 | LINC00603(dist=357865), PTGER4(dist=268741)   | intergenic     |
| 5   | 40414419  | C  | T  | rs1445004              | 3.57E-04        | 0.340     | 0.387        | 1.23 | 1.09 - 1.38 | 4.98E-05      | 0.336     | 0.389        | 1.26 | 1.13 - 1.41 | 1.24     | 1.12E-07 | LINC00603(dist=360993), PTGER4(dist=265613)   | intergenic     |
| 5   | 40414886  | A  | C  | rs7711427              | 3.43E-04        | 0.339     | 0.387        | 1.23 | 1.1 - 1.38  | 5.24E-05      | 0.335     | 0.389        | 1.26 | 1.13 - 1.41 | 1.24     | 1.12E-07 | LINC00603(dist=361460), PTGER4(dist=265146)   | intergenic     |
| 9   | 117820041 | G  | T  | rs75471482             | 5.20E-05        | 0.065     | 0.042        | 1.59 | 1.25 - 2.03 | 3.71E-04      | 0.063     | 0.041        | 1.56 | 1.25 - 1.96 | 1.64     | 1.38E-07 | TNC                                           | intronic       |
| 6   | 32586908  | G  | A  | rs9271367;rs386699490  | 2.28E-05        | 0.308     | 0.256        | 0.77 | 0.68 - 0.87 | 5.59E-04      | 0.309     | 0.269        | 0.82 | 0.73 - 0.92 | 0.79     | 1.40E-07 | HLA-DRB1(dist=29295), HLA-DQA1(dist=18275)    | intergenic     |
| 9   | 117827060 | C  | T  | rs61738263             | 2.45E-05        | 0.068     | 0.044        | 1.60 | 1.26 - 2.03 | 8.14E-04      | 0.062     | 0.042        | 1.52 | 1.21 - 1.91 | 1.64     | 1.61E-07 | TNC                                           | exonic         |
| 5   | 158782684 | C  | T  | rs11749526             | 3.20E-05        | 0.020     | 0.034        | 0.58 | 0.41 - 0.83 | 9.64E-04      | 0.023     | 0.042        | 0.54 | 0.39 - 0.75 | 0.53     | 2.64E-07 | LOC285626, IL12B (dist=25203)                 | ncRNA_intronic |
| 5   | 40391104  | C  | T  | rs6865484              | 1.22E-03        | 0.310     | 0.350        | 1.20 | 1.07 - 1.35 | 3.20E-05      | 0.303     | 0.358        | 1.28 | 1.14 - 1.43 | 1.24     | 2.70E-07 | LINC00603(dist=337678), PTGER4(dist=288928)   | intergenic     |
| 5   | 40419429  | T  | C  | rs71590609             | 9.72E-04        | 0.347     | 0.390        | 1.20 | 1.07 - 1.35 | 5.16E-05      | 0.336     | 0.388        | 1.26 | 1.13 - 1.4  | 1.24     | 3.16E-07 | LINC00603(dist=366003), PTGER4(dist=260603)   | intergenic     |
| 5   | 40385134  | C  | T  | rs10473187             | 1.23E-03        | 0.310     | 0.350        | 1.20 | 1.07 - 1.35 | 3.80E-05      | 0.304     | 0.358        | 1.27 | 1.14 - 1.43 | 1.24     | 3.17E-07 | LINC00603(dist=331708), PTGER4(dist=294898)   | intergenic     |
| 21  | 16801277  | C  | G  | rs2242830              | 1.04E-03        | 0.499     | 0.447        | 0.81 | 0.73 - 0.9  | 3.42E-05      | 0.510     | 0.475        | 0.87 | 0.78 - 0.97 | 0.80     | 3.99E-07 | NRIP1(dist=364151), USP25(dist=301067)        | intergenic     |
| 5   | 40418135  | G  | C  | rs12654092             | 1.70E-03        | 0.382     | 0.423        | 1.19 | 1.06 - 1.33 | 3.72E-05      | 0.394     | 0.446        | 1.24 | 1.11 - 1.38 | 1.24     | 4.34E-07 | LINC00603(dist=364709), PTGER4(dist=261897)   | intergenic     |
| 6   | 32592437  | T  | A  | rs182324300            | 2.30E-05        | 0.072     | 0.051        | 1.44 | 1.14 - 1.8  | 2.06E-03      | 0.059     | 0.044        | 1.37 | 1.09 - 1.72 | 1.77     | 4.40E-07 | HLA-DRB1(dist=34824), HLA-DQA1(dist=12746)    | intergenic     |
| 14  | 77137585  | G  | A  | rs12185039             | 5.49E-03        | 0.122     | 0.096        | 1.31 | 1.1 - 1.57  | 8.58E-06      | 0.127     | 0.098        | 1.33 | 1.13 - 1.56 | 1.42     | 4.48E-07 | ESRRB(dist=169405), VASH1(dist=90650)         | intergenic     |
| 21  | 16799818  | G  | A  | rs7276764              | 1.78E-03        | 0.277     | 0.314        | 0.84 | 0.74 - 0.95 | 3.24E-05      | 0.281     | 0.320        | 0.83 | 0.74 - 0.93 | 0.77     | 6.36E-07 | NRIP1(dist=362692), USP25(dist=302526)        | intergenic     |
| 21  | 16816017  | A  | G  | rs1297264              | 2.00E-03        | 0.442     | 0.393        | 0.82 | 0.73 - 0.92 | 3.90E-05      | 0.437     | 0.393        | 0.83 | 0.75 - 0.93 | 0.81     | 6.45E-07 | NRIP1(dist=378891), USP25(dist=286327)        | intergenic     |
| 21  | 16820081  | A  | T  | rs1297269              | 2.77E-03        | 0.440     | 0.393        | 0.83 | 0.74 - 0.92 | 2.73E-05      | 0.436     | 0.391        | 0.83 | 0.75 - 0.92 | 0.81     | 6.78E-07 | NRIP1(dist=382955), USP25(dist=282263)        | intergenic     |
| 3   | 45989578  | C  | G  | rs55698153             | 1.82E-05        | 0.050     | 0.075        | 0.64 | 0.51 - 0.81 | 7.67E-03      | 0.037     | 0.049        | 0.75 | 0.57 - 0.98 | 0.60     | 6.94E-07 | CXCR6(NM_006564:c.*576C>G)                    | UTR3           |
| 21  | 16814655  | A  | C  | rs1297263              | 2.69E-03        | 0.455     | 0.407        | 0.82 | 0.74 - 0.92 | 3.26E-05      | 0.452     | 0.406        | 0.83 | 0.75 - 0.92 | 0.82     | 7.45E-07 | NRIP1(dist=377529), USP25(dist=287689)        | intergenic     |
| 21  | 16812882  | C  | T  | rs1736023              | 2.87E-03        | 0.454     | 0.407        | 0.83 | 0.74 - 0.92 | 3.08E-05      | 0.454     | 0.407        | 0.83 | 0.75 - 0.92 | 0.82     | 7.59E-07 | NRIP1(dist=375756), USP25(dist=289462)        | intergenic     |
| 8   | 103659239 | T  | G  | rs76386016             | 1.37E-02        | 0.035     | 0.027        | 1.27 | 0.93 - 1.74 | 6.28E-07      | 0.037     | 0.021        | 1.77 | 1.31 - 2.39 | 2.24     | 7.74E-07 | ODF1(dist=85994), KLF10(dist=1766)            | intergenic     |
| 21  | 16823163  | C  | T  | rs1297271              | 3.77E-03        | 0.440     | 0.395        | 0.83 | 0.74 - 0.93 | 2.46E-05      | 0.434     | 0.388        | 0.83 | 0.74 - 0.92 | 0.82     | 8.60E-07 | NRIP1(dist=386037), USP25(dist=279181)        | intergenic     |
| 21  | 16811996  | C  | T  | rs1736145              | 3.22E-03        | 0.455     | 0.408        | 0.83 | 0.74 - 0.92 | 4.00E-05      | 0.452     | 0.406        | 0.83 | 0.75 - 0.92 | 0.82     | 1.06E-06 | NRIP1(dist=374870), USP25(dist=290348)        | intergenic     |
| 21  | 16812599  | C  | T  | rs1297260              | 3.24E-03        | 0.458     | 0.412        | 0.83 | 0.74 - 0.93 | 4.07E-05      | 0.452     | 0.407        | 0.83 | 0.75 - 0.92 | 0.82     | 1.07E-06 | NRIP1(dist=375473), USP25(dist=289745)        | intergenic     |
| 21  | 16812623  | T  | C  | rs1297261              | 3.25E-03        | 0.458     | 0.412        | 0.83 | 0.74 - 0.93 | 4.08E-05      | 0.452     | 0.407        | 0.83 | 0.75 - 0.92 | 0.82     | 1.08E-06 | NRIP1(dist=375497), USP25(dist=289721)        | intergenic     |
| 21  | 16812630  | C  | T  | rs1297262              | 3.24E-03        | 0.458     | 0.412        | 0.83 | 0.74 - 0.93 | 4.11E-05      | 0.452     | 0.407        | 0.83 | 0.75 - 0.92 | 0.82     | 1.08E-06 | NRIP1(dist=375504), USP25(dist=289714)        | intergenic     |
| 2   | 25        |    |    |                        |                 |           |              |      |             |               |           |              |      |             |          |          |                                               |                |

|    |           |   |   |                        |          |       |       |      |      |      |          |       |       |      |      |      |      |          |                                                |                |
|----|-----------|---|---|------------------------|----------|-------|-------|------|------|------|----------|-------|-------|------|------|------|------|----------|------------------------------------------------|----------------|
| 5  | 40497604  | G | A | rs4286721              | 4.72E-05 | 0.330 | 0.384 | 1.26 | 1.13 | 1.42 | 5.43E-03 | 0.335 | 0.369 | 1.16 | 1.04 | 1.29 | 1.22 | 1.87E-06 | LINC00603(dist=444178), PTGER4(dist=182428)    | intergenic     |
| 15 | 68633773  | T | C | rs8035990              | 6.05E-05 | 0.414 | 0.348 | 0.75 | 0.67 | 0.84 | 7.59E-03 | 0.400 | 0.385 | 0.94 | 0.84 | 1.04 | 0.81 | 1.89E-06 | ITGA11                                         | intronic       |
| 21 | 16813212  | T | C | rs1736148              | 5.90E-03 | 0.472 | 0.426 | 0.83 | 0.75 | 0.93 | 4.07E-05 | 0.452 | 0.406 | 0.83 | 0.75 | 0.92 | 0.82 | 1.99E-06 | NRIP1(dist=376086), USP25(dist=289132)         | intergenic     |
| 21 | 16834006  | C | A | rs1736039              | 8.94E-03 | 0.439 | 0.398 | 0.85 | 0.76 | 0.94 | 2.33E-05 | 0.434 | 0.389 | 0.83 | 0.75 | 0.92 | 0.82 | 2.11E-06 | NRIP1(dist=396880), USP25(dist=268338)         | intergenic     |
| 9  | 21342332  | G | A | rs4526448              | 2.26E-02 | 0.279 | 0.256 | 0.89 | 0.79 | 1.01 | 6.37E-06 | 0.289 | 0.238 | 0.77 | 0.69 | 0.87 | 0.80 | 2.16E-06 | KLHL9(dist=6903), IFNA6(dist=7985)             | intergenic     |
| 21 | 16807749  | A | G | rs1297259              | 4.86E-03 | 0.460 | 0.415 | 0.83 | 0.75 | 0.93 | 5.72E-05 | 0.453 | 0.409 | 0.84 | 0.75 | 0.93 | 0.82 | 2.19E-06 | NRIP1(dist=370623), USP25(dist=294595)         | intergenic     |
| 8  | 103642111 | G | A | rs6998910              | 1.62E-02 | 0.033 | 0.026 | 1.28 | 0.93 | 1.76 | 2.81E-06 | 0.037 | 0.022 | 1.72 | 1.28 | 2.32 | 2.17 | 2.23E-06 | ODF1(dist=68866), KLF10(dist=18894)            | intergenic     |
| 1  | 67630341  | A | T | rs10889663             | 8.74E-03 | 0.299 | 0.331 | 0.86 | 0.77 | 0.97 | 3.46E-05 | 0.274 | 0.313 | 0.83 | 0.74 | 0.93 | 0.78 | 2.60E-06 | C1orf141(dist=29687), IL23R(dist=1828)         | intergenic     |
| 6  | 32589301  | A | G | rs9271501              | 4.95E-05 | 0.370 | 0.422 | 0.80 | 0.72 | 0.9  | 4.80E-03 | 0.376 | 0.417 | 0.84 | 0.76 | 0.94 | 0.82 | 2.72E-06 | HLA-DRB1(dist=31688), HLA-DQA1(dist=15882)     | intergenic     |
| 6  | 32589300  | C | T | rs9271500              | 4.65E-05 | 0.370 | 0.422 | 0.80 | 0.72 | 0.9  | 5.22E-03 | 0.376 | 0.416 | 0.84 | 0.76 | 0.94 | 0.82 | 2.84E-06 | HLA-DRB1(dist=31687), HLA-DQA1(dist=15883)     | intergenic     |
| 6  | 32668111  | T | C | rs116026851            | 5.54E-05 | 0.126 | 0.096 | 1.35 | 1.14 | 1.61 | 5.56E-03 | 0.120 | 0.092 | 1.35 | 1.14 | 1.59 | 1.36 | 3.30E-06 | HLA-DQB1(dist=33645), HLA-DQA2(dist=41052)     | intergenic     |
| 6  | 32676547  | G | A | rs142373984            | 4.99E-05 | 0.113 | 0.088 | 1.33 | 1.1  | 1.59 | 6.09E-03 | 0.102 | 0.078 | 1.34 | 1.12 | 1.6  | 1.43 | 3.39E-06 | HLA-DQB1(dist=42081), HLA-DQA2(dist=32616)     | intergenic     |
| 6  | 167541624 | T | C | rs41414848             | 4.04E-02 | 0.071 | 0.089 | 0.78 | 0.64 | 0.96 | 1.50E-06 | 0.042 | 0.068 | 0.61 | 0.48 | 0.78 | 0.67 | 3.50E-06 | CCR6                                           | intronic       |
| 21 | 16806695  | A | G | rs1736137              | 7.60E-03 | 0.468 | 0.425 | 0.84 | 0.76 | 0.94 | 6.32E-05 | 0.464 | 0.420 | 0.84 | 0.75 | 0.93 | 0.83 | 3.75E-06 | NRIP1(dist=369569), USP25(dist=295649)         | intergenic     |
| 16 | 82234820  | C | A | rs73595019             | 5.02E-05 | 0.077 | 0.055 | 1.43 | 1.15 | 1.78 | 7.56E-03 | 0.072 | 0.055 | 1.34 | 1.09 | 1.65 | 1.51 | 3.79E-06 | MPHOSP6(dist=30991), CDH13(dist=425579)        | intergenic     |
| 6  | 32548359  | T | C | rs28732269             | 2.07E-06 | 0.071 | 0.097 | 0.71 | 0.58 | 0.87 | 1.63E-01 | 0.083 | 0.091 | 0.91 | 0.76 | 1.1  | 0.52 | 3.87E-06 | HLA-DRB1                                       | intronic       |
| 21 | 16823258  | T | A | rs1736034              | 1.42E-02 | 0.455 | 0.490 | 0.87 | 0.78 | 0.97 | 1.91E-05 | 0.527 | 0.478 | 0.82 | 0.74 | 0.91 | 0.82 | 3.91E-06 | NRIP1(dist=386132), USP25(dist=279086)         | intergenic     |
| 19 | 20413114  | A | G | rs2336216              | 3.62E-02 | 0.308 | 0.289 | 1.10 | 0.98 | 1.24 | 6.60E-06 | 0.303 | 0.251 | 1.30 | 1.16 | 1.46 | 1.24 | 3.97E-06 | ZNF486(dist=101814), MIR1270(dist=96968)       | intergenic     |
| 7  | 38096372  | C | G | rs190657492            | 1.25E-02 | 0.043 | 0.033 | 1.32 | 0.99 | 1.76 | 3.02E-05 | 0.053 | 0.033 | 1.65 | 1.29 | 2.12 | 1.74 | 4.26E-06 | EPDR1(dist=104830), STARD3NL(dist=121436)      | intergenic     |
| 8  | 50360812  | C | A | rs142570366            | 3.89E-07 | 0.059 | 0.035 | 1.74 | 1.34 | 2.26 | 1.50E-01 | 0.047 | 0.038 | 1.26 | 0.98 | 1.62 | 1.65 | 4.31E-06 | C8orf22(dist=372170), SNTG1(dist=461537)       | intergenic     |
| 5  | 86345523  | A | G | rs6872785              | 1.91E-02 | 0.492 | 0.447 | 1.20 | 1.08 | 1.34 | 1.58E-05 | 0.525 | 0.490 | 1.15 | 1.04 | 1.28 | 1.22 | 4.45E-06 | LOC100505878(dist=299934), MIR4280(dist=65173) | intergenic     |
| 13 | 97645439  | C | T | rs9300381              | 3.38E-02 | 0.064 | 0.052 | 1.23 | 0.97 | 1.55 | 7.80E-06 | 0.077 | 0.049 | 1.64 | 1.34 | 2.02 | 1.50 | 4.56E-06 | OXGR1                                          | intronic       |
| 13 | 97644347  | T | C | rs9584460              | 3.61E-02 | 0.063 | 0.052 | 1.22 | 0.97 | 1.55 | 7.63E-06 | 0.077 | 0.049 | 1.64 | 1.34 | 2.02 | 1.51 | 4.82E-06 | OXGR1                                          | intronic       |
| 1  | 81031622  | T | C | rs146941583            | 3.21E-05 | 0.059 | 0.036 | 1.67 | 1.29 | 2.16 | 1.64E-02 | 0.054 | 0.040 | 1.38 | 1.09 | 1.75 | 1.58 | 5.33E-06 | LOC101927412                                   | ncRNA_intronic |
| 11 | 5400971   | G | A | rs7948662              | 2.07E-02 | 0.323 | 0.354 | 0.87 | 0.78 | 0.98 | 3.55E-05 | 0.289 | 0.336 | 0.80 | 0.72 | 0.9  | 0.82 | 5.81E-06 | OR51B5                                         | intronic       |
| 5  | 86357920  | A | G | rs6885404              | 1.34E-02 | 0.489 | 0.440 | 1.22 | 1.09 | 1.36 | 4.34E-05 | 0.520 | 0.487 | 1.14 | 1.03 | 1.27 | 1.21 | 5.86E-06 | LOC100505878(dist=312331), MIR4280(dist=52776) | intergenic     |
| 9  | 21344320  | C | T | rs667069               | 4.23E-02 | 0.281 | 0.261 | 0.90 | 0.8  | 1.02 | 9.46E-06 | 0.300 | 0.251 | 0.78 | 0.7  | 0.88 | 0.81 | 5.91E-06 | KLHL9(dist=8891), IFNA6(dist=5997)             | intergenic     |
| 7  | 46947326  | G | C | rs73694483             | 1.70E-02 | 0.048 | 0.037 | 1.31 | 1    | 1.71 | 2.86E-05 | 0.054 | 0.032 | 1.71 | 1.33 | 2.18 | 1.65 | 6.04E-06 | IGFBP3(dist=986455), TNS3(dist=367426)         | intergenic     |
| 17 | 78354661  | C | T | rs4889848              | 2.88E-02 | 0.055 | 0.037 | 0.66 | 0.51 | 0.85 | 2.12E-05 | 0.105 | 0.086 | 0.81 | 0.68 | 0.96 | 0.66 | 6.53E-06 | RNF213                                         | exonic         |
| 1  | 201918527 | T | G | rs2820304              | 1.08E-06 | 0.116 | 0.148 | 0.76 | 0.64 | 0.89 | 7.83E-02 | 0.142 | 0.167 | 0.82 | 0.71 | 0.95 | 0.76 | 6.82E-06 | LMOD1(dist=2811), TIMM17A(dist=6092)           | intergenic     |
| 19 | 13719658  | C | T | rs114463198            | 5.15E-06 | 0.042 | 0.027 | 1.59 | 1.17 | 2.15 | 8.59E-01 | 0.025 | 0.023 | 1.09 | 0.78 | 1.52 | 2.57 | 6.84E-06 | CACNA1A(dist=102384), CCDC130(dist=139095)     | intergenic     |
| 6  | 32524150  | G | C | rs146662207            | 1.94E-05 | 0.255 | 0.291 | 0.83 | 0.73 | 0.94 | 1.90E-02 | 0.305 | 0.328 | 0.90 | 0.81 | 1.01 | 0.78 | 6.91E-06 | HLA-DRB6                                       | ncRNA_intronic |
| 7  | 38046849  | T | C | rs1524050              | 1.47E-01 | 0.241 | 0.224 | 1.10 | 0.96 | 1.25 | 3.86E-07 | 0.279 | 0.223 | 1.35 | 1.2  | 1.52 | 1.25 | 6.95E-06 | EPDR1(dist=55307), STARD3NL(dist=170959)       | intergenic     |
| 1  | 67617594  | C | G | rs12079083             | 5.29E-05 | 0.356 | 0.410 | 0.79 | 0.71 | 0.89 | 1.30E-02 | 0.372 | 0.402 | 0.88 | 0.79 | 0.98 | 0.83 | 7.32E-06 | C1orf141(dist=16940), IL23R(dist=14575)        | intergenic     |
| 1  | 120553996 | C | T | rs7530844              | 3.63E-05 | 0.215 | 0.157 | 1.47 | 1.27 | 1.69 | 1.61E-02 | 0.320 | 0.233 | 0.99 | 0.87 | 1.12 | 1.33 | 8.32E-06 | NOTCH2                                         | intronic       |
| 5  | 86351817  | A | G | rs10043132             | 3.20E-02 | 0.489 | 0.445 | 1.19 | 1.07 | 1.33 | 1.51E-05 | 0.526 | 0.489 | 1.16 | 1.04 | 1.28 | 1.20 | 8.32E-06 | LOC100505878(dist=306228), MIR4280(dist=58879) | intergenic     |
| 2  | 212867845 | G | A | rs5005261              | 1.09E-01 | 0.083 | 0.084 | 0.99 | 0.81 | 1.21 | 2.65E-06 | 0.082 | 0.116 | 0.68 | 0.57 | 0.82 | 0.65 | 8.57E-06 | ERBB4                                          | intronic       |
| 5  | 150596303 | C | T | rs13359932             | 1.01E-05 | 0.230 | 0.288 | 0.74 | 0.65 | 0.84 | 5.00E-02 | 0.238 | 0.248 | 0.95 | 0.84 | 1.07 | 0.80 | 9.06E-06 | CCDC69                                         | intronic       |
| 6  | 31667202  | A | G | rs386525517            | 4.12E-02 | 0.129 | 0.115 | 1.14 | 0.96 | 1.34 | 1.37E-05 | 0.152 | 0.110 | 1.45 | 1.25 | 1.69 | 1.33 | 9.17E-06 | ABHD16A                                        | intronic       |
| 6  | 32671845  | A | C | rs71556932;rs148633251 | 5.72E-06 | 0.099 | 0.071 | 1.44 | 1.18 | 1.75 | 9.59E-02 | 0.067 | 0.056 | 1.22 | 0.98 | 1.5  | 1.51 | 9.38E-06 | HLA-DQB1(dist=37379), HLA-DQA2(dist=37318)     | intergenic     |
| 10 | 64858216  | G | A | rs10995435             | 1.67E-05 | 0.183 | 0.125 | 1.56 | 1.34 | 1.82 | 2.04E-02 | 0.191 | 0.182 | 1.06 | 0.93 | 1.21 | 1.32 | 9.46E-06 | EGR2(dist=279289), NRBF2(dist=34791)           | intergenic     |
| 9  | 21340786  | C | A | rs10119678             | 2.99E-02 | 0.315 | 0.295 | 1.10 | 0.98 | 1.24 | 3.14E-05 | 0.334 | 0.283 | 1.27 | 1.14 | 1.42 | 1.22 | 9.55E-06 | KLHL9(dist=5357), IFNA6(dist=9531)             | intergenic     |
| 6  | 42085225  | C | T | rs4579355              | 5.56E-05 | 0.363 | 0.409 | 1.21 | 1.08 | 1.36 | 1.48E-02 | 0.360 | 0.397 | 1.17 | 1.05 | 1.31 | 1.20 | 1.01E-05 | C6orf132                                       | intronic       |
| 1  | 239712161 | A | G | rs1218659              | 3.42E-05 | 0.118 | 0.088 | 1.39 | 1.16 | 1.66 | 3.10E-02 | 0.132 | 0.113 | 1.19 | 1.02 | 1.4  | 1.37 | 1.07E-05 | LINC01139(dist=1062844), CHRM3(dist=80212)     | intergenic     |
| 19 | 20415185  | A | G | rs75343420             | 6.93E-02 | 0.305 | 0.288 | 1.09 | 0.96 | 1.22 | 7.66E-06 | 0.303 | 0.251 | 1.30 | 1.16 | 1.46 | 1.23 | 1.09E-05 | ZNF486(dist=103886), MIR1270(dist=94896)       | intergenic     |
| 5  | 5813344   | C | T | rs114394118            | 1.05E-05 | 0.031 | 0.054 | 0.57 | 0.43 | 0.76 | 8.78E-01 | 0.045 | 0.042 | 1.08 | 0.84 | 1.39 | 0.48 | 1.10E-05 | ICE1(dist=322997), FLJ33360(dist=497210)       | intergenic     |
| 1  | 67619345  | C | G | rs11209007             | 3.83E-05 | 0.379 | 0.437 | 0.79 | 0.7  | 0.88 | 2.16E-02 | 0.399 | 0.426 | 0.90 | 0.81 | 1    | 0.84 | 1.11E-05 | C1orf141(dist=18691), IL23R(dist=12824)        | intergenic     |
| 1  | 67619259  | T | G | rs11209006             | 3.84E-05 | 0.379 | 0.437 | 0.79 | 0.7  | 0.88 | 2.16E-02 | 0.399 | 0.426 | 0.90 | 0.81 | 1    | 0.84 | 1.11E-05 | C1orf141(dist=18605), IL23R(dist=12910)        | intergenic     |
| 1  | 156842336 | C | T | rs12132885             | 1.48E-05 | 0.184 | 0.138 | 1.40 | 1.21 | 1.62 | 4.81E-02 | 0.177 | 0.174 | 1.02 | 0.89 | 1.17 | 1.39 | 1.13E-05 | NTRK1                                          | intronic       |
| 9  | 21339969  | C | A | rs12237982             | 5.29E-02 | 0.311 | 0.293 | 1.09 | 0.97 | 1.23 | 1.50E-05 | 0.334 | 0.283 | 1.28 | 1.14 | 1.43 | 1.22 | 1.13E-05 | KLHL9(dist=4540), IFNA6(dist=10348)            | intergenic     |
| 14 | 77142576  | G | A | rs11626940             | 1.21E-01 | 0.088 | 0.071 | 1.27 | 1.04 | 1.56 | 3.18E-06 | 0.103 | 0.077 | 1.37 | 1.15 | 1.64 | 1.40 | 1.15E-05 | ESRRB(dist=174396), VASH1(dist=85659)          | intergenic     |
| 5  | 86343998  | G | T | rs2929621              | 1.90E-02 | 0.526 | 0.474 | 0.81 | 0.73 | 0.91 | 6.38E-05 | 0.439 | 0.466 | 0.90 | 0.81 | 0.99 | 0.83 | 1.19E-05 | LOC100505878(dist=298409), MIR4280(dist=66698) | intergenic     |
| 13 | 109503016 | A | T | rs7330740              | 9.36E-06 | 0.384 | 0.326 | 0.78 | 0.69 | 0.87 | 1.12E-01 | 0.366 | 0.353 | 0.95 | 0.85 | 1.05 | 0.81 | 1.24E-05 | MYO16                                          | intronic       |
| 21 | 30922000  | G | T | rs9982017              | 9.78E-02 | 0.054 | 0.041 | 0.74 | 0.57 | 0.96 | 4.84E-06 | 0.081 | 0.063 | 0.76 | 0.63 | 0.93 | 0.64 | 1.24E-05 | GRIK1                                          | intronic       |
| 10 | 57156142  | T | C | rs11816346             | 4.88E-05 | 0.034 | 0.058 | 0.56 | 0.43 | 0.74 | 1.71E-02 | 0.032 | 0.042 | 0.76 | 0.57 | 1.01 | 0.63 | 1.25E-05 | PCDH15(dist=595091), MTRNR2L5(dist=202608)     | intergenic     |
| 7  | 38034057  | A | G | rs7804635              | 1.51E-01 | 0.477 | 0.500 | 1.10 | 0.98 | 1.22 | 8.21E-07 | 0.429 | 0.493 | 1.29 | 1.16 | 1.43 | 1.19 | 1.34E-05 |                                                |                |

|    |           |   |   |                        |          |       |       |      |      |       |          |       |       |      |      |       |      |          |                                               |                |
|----|-----------|---|---|------------------------|----------|-------|-------|------|------|-------|----------|-------|-------|------|------|-------|------|----------|-----------------------------------------------|----------------|
| 7  | 38036389  | A | G | rs12533160             | 1.83E-01 | 0.481 | 0.502 | 1.09 | 0.98 | -1.21 | 6.61E-07 | 0.434 | 0.498 | 1.29 | 1.16 | -1.43 | 1.19 | 1.65E-05 | EPDR1(dist=44847), STARD3NL(dist=181419)      | intergenic     |
| 9  | 117111592 | T | C | rs1490744              | 4.08E-02 | 0.203 | 0.210 | 1.05 | 0.91 | -1.2  | 4.95E-05 | 0.196 | 0.253 | 1.38 | 1.22 | -1.57 | 1.23 | 1.67E-05 | AKNA                                          | intronic       |
| 17 | 78401588  | G | T | rs8065290              | 7.28E-02 | 0.057 | 0.043 | 0.74 | 0.57 | -0.95 | 1.40E-05 | 0.098 | 0.081 | 0.81 | 0.68 | -0.97 | 0.65 | 1.68E-05 | ENDOV                                         | intronic       |
| 1  | 6747516   | A | G | rs156990               | 6.60E-07 | 0.023 | 0.049 | 0.46 | 0.33 | -0.64 | 2.94E-01 | 0.025 | 0.027 | 0.93 | 0.67 | -1.29 | 0.57 | 1.68E-05 | DNAJC11                                       | intronic       |
| 13 | 109502665 | A | G | rs9301328              | 1.40E-05 | 0.387 | 0.330 | 0.78 | 0.7  | -0.87 | 1.14E-01 | 0.369 | 0.357 | 0.95 | 0.85 | -1.05 | 0.81 | 1.71E-05 | MYO16                                         | intronic       |
| 1  | 201493667 | A | G | rs2782576              | 1.44E-05 | 0.143 | 0.112 | 0.75 | 0.64 | -0.89 | 8.47E-02 | 0.136 | 0.123 | 0.89 | 0.76 | -1.04 | 0.71 | 1.74E-05 | RPS10P7(dist=3947), NAV1(dist=123783)         | intergenic     |
| 7  | 38040027  | T | G | rs2392524              | 1.18E-01 | 0.493 | 0.466 | 1.11 | 1    | -1.24 | 2.52E-06 | 0.544 | 0.484 | 1.27 | 1.15 | -1.41 | 1.19 | 1.75E-05 | EPDR1(dist=48485), STARD3NL(dist=177781)      | intergenic     |
| 14 | 85111141  | T | C | rs75956164             | 3.17E-06 | 0.013 | 0.032 | 0.40 | 0.27 | -0.62 | 1.43E-01 | 0.018 | 0.022 | 0.83 | 0.57 | -1.22 | 0.52 | 1.80E-05 | NONE(dist=NONE), LINC00911(dist=749082)       | intergenic     |
| 21 | 16835028  | G | A | rs12626383;rs201766816 | 7.71E-02 | 0.411 | 0.443 | 0.88 | 0.78 | -0.98 | 7.19E-06 | 0.397 | 0.441 | 0.83 | 0.75 | -0.93 | 0.83 | 1.85E-05 | NRIP1(dist=397902), USP25(dist=267316)        | intergenic     |
| 7  | 38039819  | C | T | rs4517022              | 1.23E-01 | 0.493 | 0.467 | 1.11 | 1    | -1.24 | 2.54E-06 | 0.544 | 0.484 | 1.27 | 1.15 | -1.41 | 1.19 | 1.87E-05 | EPDR1(dist=48277), STARD3NL(dist=177989)      | intergenic     |
| 6  | 31745518  | A | G | rs707927               | 8.55E-02 | 0.152 | 0.140 | 1.10 | 0.94 | -1.28 | 7.99E-06 | 0.178 | 0.129 | 1.46 | 1.27 | -1.68 | 1.28 | 1.92E-05 | VARS                                          | intronic       |
| 13 | 109500374 | C | T | rs1475142              | 1.89E-05 | 0.390 | 0.333 | 0.78 | 0.7  | -0.88 | 1.04E-01 | 0.367 | 0.353 | 0.94 | 0.85 | -1.05 | 0.82 | 1.94E-05 | MYO16                                         | intronic       |
| 7  | 3391771   | T | C | rs12538216             | 4.09E-02 | 0.125 | 0.133 | 0.93 | 0.79 | -1.1  | 3.65E-05 | 0.115 | 0.156 | 0.70 | 0.6  | -0.82 | 0.76 | 1.95E-05 | SDK1                                          | intronic       |
| 7  | 38037534  | A | T | rs4562215              | 1.16E-01 | 0.479 | 0.455 | 1.10 | 0.99 | -1.23 | 3.50E-06 | 0.516 | 0.453 | 1.29 | 1.16 | -1.43 | 1.19 | 1.96E-05 | EPDR1(dist=45992), STARD3NL(dist=180274)      | intergenic     |
| 6  | 98829593  | C | T | rs149695220            | 2.00E-05 | 0.017 | 0.036 | 0.46 | 0.32 | -0.67 | 5.51E-02 | 0.020 | 0.026 | 0.78 | 0.54 | -1.12 | 0.55 | 1.99E-05 | MIR2113(dist=357098), POU3F2(dist=452987)     | intergenic     |
| 7  | 38044200  | A | G | rs10951545             | 1.08E-01 | 0.474 | 0.450 | 1.10 | 0.99 | -1.23 | 4.73E-06 | 0.511 | 0.449 | 1.28 | 1.16 | -1.43 | 1.18 | 2.05E-05 | EPDR1(dist=52658), STARD3NL(dist=173608)      | intergenic     |
| 6  | 32383532  | A | G | rs16870135             | 5.81E-05 | 0.087 | 0.063 | 1.44 | 1.17 | -1.77 | 3.03E-02 | 0.077 | 0.060 | 1.30 | 1.07 | -1.59 | 1.43 | 2.06E-05 | BTNL2(dist=8625), HLA-DRA(dist=24087)         | intergenic     |
| 16 | 83579209  | C | A | rs34822345             | 6.75E-02 | 0.110 | 0.113 | 0.98 | 0.82 | -1.16 | 2.24E-05 | 0.102 | 0.147 | 0.65 | 0.55 | -0.77 | 0.76 | 2.09E-05 | CDH13                                         | intronic       |
| 11 | 125621696 | T | C | rs516661               | 8.10E-02 | 0.129 | 0.111 | 0.85 | 0.72 | -1    | 1.91E-05 | 0.152 | 0.124 | 0.79 | 0.68 | -0.91 | 0.76 | 2.09E-05 | PATE1(dist=1953), PATE2(dist=24332)           | intergenic     |
| 19 | 36658594  | G | A | rs73931503             | 1.10E-01 | 0.329 | 0.312 | 1.08 | 0.96 | -1.22 | 4.19E-06 | 0.340 | 0.296 | 1.22 | 1.1  | -1.37 | 1.25 | 2.15E-05 | COX7A1(dist=14823), ZNF565(dist=14368)        | intergenic     |
| 1  | 239719408 | A | G | rs4659546              | 3.29E-05 | 0.121 | 0.092 | 0.73 | 0.61 | -0.87 | 5.51E-02 | 0.130 | 0.113 | 0.85 | 0.73 | -1    | 0.74 | 2.22E-05 | LINC01139(dist=1070091), CHRM3(dist=72965)    | intergenic     |
| 7  | 38039300  | A | G | rs6971093              | 1.72E-01 | 0.472 | 0.494 | 1.09 | 0.98 | -1.22 | 1.30E-06 | 0.425 | 0.488 | 1.29 | 1.16 | -1.43 | 1.19 | 2.24E-05 | EPDR1(dist=47758), STARD3NL(dist=178508)      | intergenic     |
| 21 | 47358577  | A | G | rs4014111              | 3.38E-02 | 0.446 | 0.422 | 1.10 | 0.99 | -1.23 | 6.19E-05 | 0.452 | 0.399 | 1.24 | 1.12 | -1.38 | 1.19 | 2.25E-05 | PCBP3                                         | intronic       |
| 6  | 14765162  | C | T | rs731187               | 8.95E-09 | 0.354 | 0.407 | 0.80 | 0.71 | -0.89 | 5.32E-01 | 0.393 | 0.420 | 0.89 | 0.8  | -0.99 | 0.83 | 2.30E-05 | LINC01108(dist=479477),JARID2(dist=481044)    | intergenic     |
| 7  | 38034119  | C | T | rs28455667             | 1.66E-01 | 0.471 | 0.493 | 1.09 | 0.98 | -1.22 | 1.54E-06 | 0.426 | 0.488 | 1.29 | 1.16 | -1.43 | 1.18 | 2.35E-05 | EPDR1(dist=42577), STARD3NL(dist=183689)      | intergenic     |
| 14 | 26621638  | A | G | rs17489782             | 3.22E-01 | 0.030 | 0.021 | 1.43 | 1.01 | -2.02 | 1.99E-06 | 0.054 | 0.038 | 1.43 | 1.13 | -1.82 | 1.69 | 2.43E-05 | STXBP6(dist=1102135),NOVA1(dist=293451)       | intergenic     |
| 11 | 5439852   | G | A | rs7943412;rs386750168  | 6.32E-02 | 0.354 | 0.342 | 0.95 | 0.85 | -1.07 | 3.35E-05 | 0.389 | 0.330 | 0.77 | 0.69 | -0.86 | 0.83 | 2.45E-05 | OR51B5                                        | intronic       |
| 7  | 38047062  | T | G | rs12534806             | 1.58E-01 | 0.510 | 0.490 | 1.08 | 0.97 | -1.21 | 2.20E-06 | 0.543 | 0.477 | 1.30 | 1.17 | -1.44 | 1.18 | 2.48E-05 | EPDR1(dist=55520), STARD3NL(dist=170746)      | intergenic     |
| 17 | 78384745  | A | C | rs9900214              | 6.03E-02 | 0.061 | 0.045 | 0.72 | 0.57 | -0.92 | 3.63E-05 | 0.106 | 0.089 | 0.82 | 0.69 | -0.98 | 0.67 | 2.55E-05 | LOC100294362                                  | ncRNA_intronic |
| 1  | 161873349 | C | T | rs16823450             | 6.49E-05 | 0.019 | 0.038 | 0.50 | 0.35 | -0.71 | 4.03E-02 | 0.020 | 0.027 | 0.75 | 0.53 | -1.08 | 0.58 | 2.55E-05 | ATF6                                          | intronic       |
| 11 | 5439816   | C | G | rs6578643              | 6.61E-02 | 0.352 | 0.340 | 0.95 | 0.85 | -1.07 | 3.34E-05 | 0.387 | 0.327 | 0.77 | 0.69 | -0.86 | 0.83 | 2.55E-05 | OR51B5                                        | intronic       |
| 21 | 41263944  | A | G | rs12627485             | 5.34E-05 | 0.191 | 0.234 | 0.77 | 0.68 | -0.88 | 3.59E-02 | 0.209 | 0.224 | 0.92 | 0.81 | -1.04 | 0.79 | 2.56E-05 | PCP4                                          | intronic       |
| 16 | 83576245  | A | G | rs55710406             | 8.10E-02 | 0.112 | 0.114 | 0.98 | 0.82 | -1.17 | 2.23E-05 | 0.107 | 0.154 | 0.66 | 0.56 | -0.78 | 0.77 | 2.63E-05 | CDH13                                         | intronic       |
| 6  | 110242474 | C | T | rs114711973            | 1.56E-01 | 0.027 | 0.023 | 1.16 | 0.82 | -1.65 | 1.08E-06 | 0.043 | 0.025 | 1.79 | 1.36 | -2.36 | 1.86 | 2.67E-05 | FIG4(dist=95840),GPR6(dist=56985)             | intergenic     |
| 4  | 189474647 | A | G | rs13132574             | 5.84E-06 | 0.076 | 0.050 | 1.56 | 1.24 | -1.95 | 2.04E-01 | 0.067 | 0.060 | 1.13 | 0.91 | -1.39 | 1.49 | 2.68E-05 | LINC01060                                     | ncRNA_intronic |
| 21 | 16835352  | T | A | rs60773275             | 1.25E-01 | 0.408 | 0.438 | 0.88 | 0.79 | -0.99 | 4.00E-06 | 0.398 | 0.444 | 0.83 | 0.74 | -0.92 | 0.83 | 2.69E-05 | NRIP1(dist=398226), USP25(dist=266992)        | intergenic     |
| 21 | 16835276  | A | G | rs57171270             | 1.24E-01 | 0.408 | 0.438 | 0.88 | 0.79 | -0.99 | 4.18E-06 | 0.398 | 0.444 | 0.83 | 0.74 | -0.92 | 0.83 | 2.70E-05 | NRIP1(dist=398150), USP25(dist=267068)        | intergenic     |
| 17 | 78362300  | A | T | rs6565683              | 4.47E-02 | 0.113 | 0.094 | 0.81 | 0.68 | -0.97 | 3.50E-05 | 0.147 | 0.121 | 0.80 | 0.69 | -0.93 | 0.75 | 2.71E-05 | LOC100294362                                  | ncRNA_intronic |
| 14 | 77141071  | A | G | rs10483876             | 7.06E-02 | 0.087 | 0.068 | 1.32 | 1.08 | -1.62 | 3.14E-05 | 0.101 | 0.081 | 1.27 | 1.06 | -1.52 | 1.40 | 2.72E-05 | ESRRB(dist=172891), VASH1(dist=87164)         | intergenic     |
| 6  | 98830236  | G | A | rs141348221            | 3.02E-05 | 0.017 | 0.035 | 0.46 | 0.32 | -0.68 | 5.62E-02 | 0.020 | 0.025 | 0.78 | 0.54 | -1.11 | 0.56 | 2.73E-05 | MIR2113(dist=357741),POU3F2(dist=452344)      | intergenic     |
| 6  | 32472530  | C | T | rs77294346             | 1.62E-05 | 0.172 | 0.203 | 0.81 | 0.71 | -0.94 | 2.56E-01 | 0.166 | 0.178 | 0.92 | 0.8  | -1.06 | 0.66 | 2.73E-05 | HLA-DRA(dist=59704),HLA-DRB5(dist=12624)      | intergenic     |
| 7  | 38051483  | A | G | rs10256933             | 1.58E-01 | 0.510 | 0.490 | 1.08 | 0.97 | -1.21 | 2.55E-06 | 0.541 | 0.477 | 1.30 | 1.17 | -1.44 | 1.18 | 2.74E-05 | EPDR1(dist=59941), STARD3NL(dist=166325)      | intergenic     |
| 7  | 38051586  | C | T | rs10227912             | 1.59E-01 | 0.510 | 0.490 | 1.08 | 0.97 | -1.21 | 2.56E-06 | 0.541 | 0.477 | 1.30 | 1.17 | -1.44 | 1.18 | 2.77E-05 | EPDR1(dist=60044), STARD3NL(dist=166222)      | intergenic     |
| 19 | 50301844  | T | G | rs7248071              | 1.75E-01 | 0.404 | 0.384 | 1.09 | 0.97 | -1.22 | 6.27E-06 | 0.415 | 0.362 | 1.25 | 1.13 | -1.39 | 1.19 | 2.78E-05 | AP2A1                                         | intronic       |
| 13 | 97664072  | A | G | rs9584468              | 7.54E-02 | 0.072 | 0.061 | 1.19 | 0.95 | -1.48 | 1.59E-05 | 0.080 | 0.052 | 1.58 | 1.29 | -1.93 | 1.43 | 2.78E-05 | OXGR1(dist=17468),LINC00456(dist=160564)      | intergenic     |
| 4  | 157131416 | T | C | rs148439725            | 3.30E-05 | 0.057 | 0.037 | 1.58 | 1.22 | -2.04 | 3.61E-01 | 0.044 | 0.050 | 0.89 | 0.69 | -1.14 | 2.01 | 2.90E-05 | CTSO(dist=256368),PDGFC(dist=551347)          | intergenic     |
| 19 | 52785265  | G | A | rs7258893              | 2.40E-01 | 0.036 | 0.030 | 1.19 | 0.87 | -1.61 | 6.11E-06 | 0.053 | 0.033 | 1.63 | 1.28 | -2.09 | 1.72 | 2.90E-05 | ZNF766                                        | intronic       |
| 16 | 7598016   | T | C | rs79310683             | 2.85E-05 | 0.030 | 0.054 | 0.53 | 0.4  | -0.71 | 5.91E-02 | 0.037 | 0.046 | 0.79 | 0.61 | -1.04 | 0.65 | 2.92E-05 | RBFOX1                                        | intronic       |
| 13 | 48110785  | G | A | rs7334231              | 1.10E-06 | 0.074 | 0.119 | 0.59 | 0.48 | -0.71 | 2.64E-01 | 0.090 | 0.092 | 0.98 | 0.82 | -1.17 | 0.74 | 2.98E-05 | HTR2A(dist=639574),LINC00562(dist=393503)     | intergenic     |
| 7  | 38052934  | C | T | rs7811382              | 1.20E-01 | 0.474 | 0.450 | 1.10 | 0.98 | -1.23 | 6.45E-06 | 0.510 | 0.449 | 1.28 | 1.15 | -1.42 | 1.18 | 3.00E-05 | EPDR1(dist=61392), STARD3NL(dist=164874)      | intergenic     |
| 14 | 53703764  | T | G | rs61988947             | 6.83E-02 | 0.037 | 0.024 | 1.56 | 1.13 | -2.15 | 5.80E-05 | 0.052 | 0.039 | 1.35 | 1.06 | -1.72 | 1.69 | 3.03E-05 | LOC101927620(dist=79518),MIR5580(dist=711381) | intergenic     |
| 14 | 26602893  | C | A | rs72665066             | 4.06E-01 | 0.031 | 0.022 | 1.40 | 1    | -1.97 | 1.72E-06 | 0.053 | 0.037 | 1.45 | 1.14 | -1.85 | 1.69 | 3.04E-05 | STXBP6(dist=1083390),NOVA1(dist=312196)       | intergenic     |
| 11 | 125621914 | A | C | rs514807               | 1.21E-01 | 0.105 | 0.091 | 0.85 | 0.71 | -1.02 | 1.47E-05 | 0.125 | 0.096 | 0.74 | 0.63 | -0.87 | 0.75 | 3.07E-05 | PATE1(dist=2171),PATE2(dist=24114)            | intergenic     |
| 1  | 201919674 | C | T | rs2790898              | 5.13E-06 | 0.144 | 0.178 | 0.78 | 0.67 | -0.91 | 1.10E-01 | 0.172 | 0.197 | 0.85 | 0.74 | -0.97 | 0.79 | 3.07E-05 | LMOD1(dist=3958),TIMM17A(dist=4945)           | intergenic     |
| 13 | 48108188  | G | C | rs57937318             | 1.06E-06 | 0.073 | 0.119 | 0.58 | 0.48 | -0.71 | 2.70E-01 | 0.089 | 0.091 | 0.98 | 0.82 | -1.17 | 0.74 | 3.13E-05 | HTR2A(dist=636977),LINC00562(dist=396100)     | intergenic     |
| 11 | 125621991 | T | C | rs578915               | 1.23E-01 | 0.105 | 0.091 | 0.85 | 0.71 | -1.02 | 1.47E-05 | 0.125 | 0.096 | 0.74 | 0.63 | -0.87 | 0.75 | 3.13E-05 | PATE1(dist=2248),PATE2(dist=24037)            | intergenic     |
| 13 | 48107910  | G | A | rs59932879             | 1.04E-06 | 0.073 | 0.119 | 0.58 | 0.48 |       |          |       |       |      |      |       |      |          |                                               |                |

|    |           |   |   |                        |          |       |       |      |      |       |          |       |       |      |      |       |      |          |                                                |                |
|----|-----------|---|---|------------------------|----------|-------|-------|------|------|-------|----------|-------|-------|------|------|-------|------|----------|------------------------------------------------|----------------|
| 7  | 78989040  | A | G | rs77292209;rs372478728 | 1.16E-01 | 0.067 | 0.059 | 1.14 | 0.91 | -1.43 | 4.36E-06 | 0.080 | 0.053 | 1.55 | 1.27 | -1.89 | 1.46 | 3.25E-05 | MAGI2                                          | intronic       |
| 14 | 26621962  | G | A | rs17568297             | 7.21E-02 | 0.141 | 0.123 | 1.17 | 1    | -1.37 | 4.00E-05 | 0.158 | 0.126 | 1.31 | 1.13 | -1.51 | 1.30 | 3.30E-05 | STXBP6(dist=1102459), NOVA1(dist=293127)       | intergenic     |
| 6  | 167532787 | G | A | rs113541954            | 5.61E-02 | 0.059 | 0.074 | 0.78 | 0.63 | -0.98 | 2.39E-05 | 0.036 | 0.057 | 0.62 | 0.47 | -0.81 | 0.68 | 3.31E-05 | CCR6                                           | intronic       |
| 7  | 38043677  | G | A | rs1524053              | 1.18E-01 | 0.480 | 0.456 | 1.10 | 0.99 | -1.23 | 6.57E-06 | 0.514 | 0.454 | 1.27 | 1.14 | -1.41 | 1.18 | 3.40E-05 | EPDR1(dist=52135), STARD3NL(dist=174131)       | intergenic     |
| 19 | 50304439  | T | C | rs10421754             | 2.39E-01 | 0.411 | 0.393 | 1.08 | 0.96 | -1.2  | 6.85E-06 | 0.428 | 0.376 | 1.24 | 1.12 | -1.38 | 1.20 | 3.44E-05 | AP2A1                                          | intronic       |
| 11 | 5434202   | G | A | rs10734512             | 1.33E-01 | 0.399 | 0.393 | 0.98 | 0.87 | -1.09 | 1.21E-05 | 0.439 | 0.378 | 0.78 | 0.7  | -0.86 | 0.83 | 3.48E-05 | OR51B5                                         | intronic       |
| 13 | 110974330 | A | G | rs72655752             | 2.46E-05 | 0.080 | 0.061 | 1.34 | 1.09 | -1.66 | 7.02E-01 | 0.050 | 0.052 | 0.97 | 0.76 | -1.23 | 1.93 | 3.49E-05 | COL4A2                                         | intronic       |
| 14 | 26615874  | G | C | rs143815414            | 3.72E-01 | 0.029 | 0.021 | 1.41 | 0.99 | -2    | 2.27E-06 | 0.054 | 0.038 | 1.44 | 1.13 | -1.83 | 1.67 | 3.50E-05 | STXBP6(dist=1096371), NOVA1(dist=299215)       | intergenic     |
| 6  | 167533202 | T | C | rs79568683             | 5.40E-02 | 0.059 | 0.074 | 0.78 | 0.63 | -0.98 | 2.76E-05 | 0.037 | 0.058 | 0.63 | 0.48 | -0.81 | 0.68 | 3.50E-05 | CCR6                                           | intronic       |
| 11 | 5439772   | C | T | rs7925743              | 7.04E-02 | 0.357 | 0.346 | 0.95 | 0.85 | -1.07 | 4.70E-05 | 0.393 | 0.334 | 0.77 | 0.69 | -0.86 | 0.84 | 3.53E-05 | OR51B5                                         | intronic       |
| 7  | 78985139  | G | A | rs7784630              | 1.33E-01 | 0.067 | 0.060 | 1.13 | 0.9  | -1.41 | 3.83E-06 | 0.081 | 0.054 | 1.56 | 1.27 | -1.9  | 1.45 | 3.54E-05 | MAGI2                                          | intronic       |
| 11 | 5436753   | A | T | rs77256782             | 1.48E-01 | 0.392 | 0.387 | 0.98 | 0.87 | -1.09 | 9.76E-06 | 0.434 | 0.372 | 0.77 | 0.69 | -0.86 | 0.83 | 3.61E-05 | OR51B5                                         | intronic       |
| 2  | 18448654  | G | C | rs10206460             | 7.33E-02 | 0.257 | 0.240 | 1.10 | 0.97 | -1.25 | 2.06E-05 | 0.260 | 0.208 | 1.34 | 1.19 | -1.51 | 1.22 | 3.61E-05 | KCNS3(dist=334429), RDH14(dist=287335)         | intergenic     |
| 14 | 85091516  | A | G | rs187676736            | 6.36E-06 | 0.013 | 0.031 | 0.42 | 0.27 | -0.63 | 1.61E-01 | 0.022 | 0.025 | 0.86 | 0.6  | -1.22 | 0.53 | 3.64E-05 | NONE(dist=NONE), LINC00911(dist=768707)        | intergenic     |
| 11 | 125621220 | T | C | rs497125               | 1.17E-01 | 0.105 | 0.091 | 0.85 | 0.71 | -1.02 | 2.08E-05 | 0.125 | 0.096 | 0.74 | 0.63 | -0.87 | 0.76 | 3.66E-05 | PATE1(dist=1477), PATE2(dist=24808)            | intergenic     |
| 11 | 5439962   | G | A | rs2467231              | 6.74E-02 | 0.349 | 0.338 | 0.95 | 0.85 | -1.07 | 5.43E-05 | 0.375 | 0.316 | 0.77 | 0.69 | -1.06 | 0.84 | 3.67E-05 | OR51B5                                         | intronic       |
| 16 | 87835224  | C | G | rs58424110             | 1.83E-05 | 0.318 | 0.260 | 1.33 | 1.18 | -1.5  | 6.35E-01 | 0.358 | 0.376 | 0.93 | 0.83 | -0.83 | 1.40 | 3.73E-05 | LOC102724467(dist=22470), SLC7A5(dist=28405)   | intergenic     |
| 2  | 46188077  | G | C | rs6728240              | 2.75E-05 | 0.071 | 0.048 | 1.50 | 1.19 | -1.9  | 9.28E-01 | 0.055 | 0.054 | 1.03 | 0.82 | -1.3  | 1.83 | 3.78E-05 | PRKCE                                          | intronic       |
| 16 | 7598511   | A | G | rs76208214             | 3.52E-05 | 0.030 | 0.055 | 0.54 | 0.41 | -0.73 | 6.05E-02 | 0.038 | 0.047 | 0.79 | 0.61 | -1.04 | 0.66 | 3.80E-05 | RBFOX1                                         | intronic       |
| 13 | 109501412 | C | G | rs7986961              | 2.02E-05 | 0.392 | 0.335 | 0.78 | 0.7  | -0.87 | 1.67E-01 | 0.378 | 0.367 | 0.95 | 0.85 | -1.06 | 0.82 | 3.83E-05 | MYO16                                          | intronic       |
| 1  | 201915055 | C | T | rs2819370              | 1.78E-05 | 0.171 | 0.208 | 0.79 | 0.68 | -0.91 | 1.41E-01 | 0.202 | 0.223 | 0.88 | 0.77 | -1    | 0.79 | 3.94E-05 | LMOD1                                          | intronic       |
| 17 | 78372834  | T | A | rs4890020              | 6.52E-02 | 0.118 | 0.100 | 0.83 | 0.7  | -0.99 | 2.72E-05 | 0.147 | 0.121 | 0.80 | 0.69 | -0.93 | 0.75 | 3.98E-05 | LOC100294362                                   | ncRNA_intronic |
| 21 | 16817938  | G | A | rs2823286              | 1.29E-01 | 0.250 | 0.271 | 0.89 | 0.79 | -1.01 | 6.13E-06 | 0.261 | 0.308 | 0.80 | 0.71 | -0.89 | 0.82 | 4.00E-05 | NRIP1(dist=380812), USP25(dist=284406)         | intergenic     |
| 5  | 86333932  | C | A | rs2410732              | 1.00E-01 | 0.414 | 0.378 | 1.16 | 1.04 | -1.3  | 1.52E-05 | 0.456 | 0.420 | 1.16 | 1.04 | -1.29 | 1.19 | 4.03E-05 | LOC100505878(dist=288343), MIR4280(dist=76764) | intergenic     |
| 17 | 78371990  | A | G | rs4890019              | 6.84E-02 | 0.118 | 0.100 | 0.83 | 0.7  | -0.99 | 2.49E-05 | 0.147 | 0.121 | 0.80 | 0.69 | -0.93 | 0.75 | 4.04E-05 | LOC100294362                                   | ncRNA_intronic |
| 6  | 31492157  | C | G | rs6924459              | 1.11E-01 | 0.448 | 0.461 | 1.05 | 0.94 | -1.18 | 1.62E-05 | 0.419 | 0.486 | 1.31 | 1.18 | -1.45 | 1.18 | 4.15E-05 | MICB(dist=13256), MCCD1(dist=4582)             | intergenic     |
| 13 | 109501139 | T | G | rs7983596              | 2.18E-05 | 0.390 | 0.333 | 0.78 | 0.7  | -0.87 | 1.72E-01 | 0.377 | 0.365 | 0.95 | 0.86 | -1.06 | 0.82 | 4.16E-05 | MYO16                                          | intronic       |
| 13 | 109501308 | G | A | rs7982866              | 2.18E-05 | 0.390 | 0.333 | 0.78 | 0.7  | -0.87 | 1.73E-01 | 0.377 | 0.365 | 0.95 | 0.86 | -1.06 | 0.82 | 4.18E-05 | MYO16                                          | intronic       |
| 6  | 31493888  | T | A | rs2734574              | 1.13E-01 | 0.448 | 0.461 | 1.05 | 0.94 | -1.17 | 1.57E-05 | 0.419 | 0.485 | 1.31 | 1.18 | -1.45 | 1.18 | 4.19E-05 | MICB(dist=14987), MCCD1(dist=2851)             | intergenic     |
| 10 | 64477836  | G | A | rs224143               | 9.37E-02 | 0.242 | 0.210 | 0.83 | 0.73 | -0.95 | 3.23E-05 | 0.276 | 0.237 | 0.81 | 0.72 | -0.92 | 0.81 | 4.20E-05 | ZNF365(dist=46065), ADO(dist=86680)            | intergenic     |
| 1  | 184573082 | G | A | rs210911619            | 3.91E-05 | 0.259 | 0.293 | 1.30 | 1.14 | -1.47 | 6.77E-02 | 0.255 | 0.231 | 1.14 | 1.01 | -1.29 | 1.22 | 4.26E-05 | C1orf21                                        | intronic       |
| 13 | 109500511 | A | G | rs1475141              | 2.28E-05 | 0.391 | 0.334 | 0.78 | 0.7  | -0.88 | 1.67E-01 | 0.372 | 0.361 | 0.95 | 0.85 | -1.06 | 0.82 | 4.29E-05 | MYO16                                          | intronic       |
| 5  | 86360158  | G | T | rs2544694              | 2.12E-01 | 0.313 | 0.334 | 1.10 | 0.98 | -1.24 | 2.45E-06 | 0.277 | 0.324 | 1.25 | 1.12 | -1.41 | 1.20 | 4.31E-05 | LOC100505878(dist=314569), MIR4280(dist=50538) | intergenic     |
| 6  | 14767040  | T | A | rs9476656              | 1.01E-07 | 0.414 | 0.461 | 1.21 | 1.08 | -1.35 | 4.93E-01 | 0.525 | 0.492 | 1.14 | 1.03 | -1.27 | 1.19 | 4.43E-05 | LINC01108(dist=481355), JARID2(dist=479166)    | intergenic     |
| 11 | 5436978   | C | G | rs137890408            | 9.33E-02 | 0.374 | 0.365 | 0.96 | 0.86 | -1.07 | 3.73E-05 | 0.412 | 0.354 | 0.78 | 0.7  | -0.87 | 0.84 | 4.53E-05 | OR51B5                                         | intronic       |
| 5  | 86350878  | A | C | rs7715840              | 1.08E-01 | 0.414 | 0.379 | 1.16 | 1.04 | -1.3  | 1.56E-05 | 0.456 | 0.420 | 1.16 | 1.04 | -1.28 | 1.19 | 4.56E-05 | LOC100505878(dist=305289), MIR4280(dist=59818) | intergenic     |
| 7  | 89765561  | T | C | rs39253                | 1.05E-05 | 0.299 | 0.250 | 0.78 | 0.69 | -0.88 | 1.50E-01 | 0.277 | 0.261 | 0.92 | 0.82 | -1.03 | 0.82 | 4.62E-05 | STEAP2-AS1                                     | ncRNA_intronic |
| 9  | 36138829  | G | T | rs78709825             | 5.96E-06 | 0.078 | 0.055 | 1.47 | 1.18 | -1.83 | 1.61E-01 | 0.068 | 0.056 | 1.21 | 0.98 | -1.5  | 1.47 | 4.69E-05 | GLIPR2                                         | intronic       |
| 10 | 51465920  | G | A | rs4043622              | 1.33E-05 | 0.232 | 0.183 | 1.35 | 1.18 | -1.54 | 5.65E-01 | 0.229 | 0.232 | 0.98 | 0.87 | -1.11 | 1.56 | 4.69E-05 | AGAP7P                                         | ncRNA_exonic   |
| 6  | 167541797 | T | C | rs41378350             | 6.45E-02 | 0.059 | 0.073 | 0.79 | 0.63 | -0.98 | 2.82E-05 | 0.036 | 0.057 | 0.63 | 0.48 | -0.82 | 0.69 | 4.74E-05 | CCR6                                           | intronic       |
| 6  | 167542498 | G | A | rs41465451             | 6.51E-02 | 0.057 | 0.071 | 0.79 | 0.63 | -0.99 | 3.15E-05 | 0.036 | 0.056 | 0.63 | 0.48 | -0.82 | 0.68 | 4.75E-05 | CCR6                                           | intronic       |
| 15 | 66227360  | A | G | rs79164400             | 2.17E-01 | 0.078 | 0.064 | 1.24 | 1    | -1.53 | 9.70E-06 | 0.097 | 0.072 | 1.38 | 1.15 | -1.65 | 1.38 | 4.78E-05 | MEGF11                                         | intronic       |
| 1  | 205289282 | G | A | rs73085136             | 1.45E-05 | 0.137 | 0.105 | 1.35 | 1.14 | -1.59 | 1.46E-01 | 0.114 | 0.098 | 1.18 | 1    | -1.39 | 1.31 | 4.79E-05 | NUAK2                                          | intronic       |
| 1  | 1037313   | A | G | rs11260593             | 1.71E-01 | 0.461 | 0.458 | 1.01 | 0.91 | -1.13 | 9.62E-06 | 0.485 | 0.415 | 1.33 | 1.2  | -1.47 | 1.19 | 4.80E-05 | C1orf159                                       | intronic       |
| 5  | 86340997  | C | G | rs2410728              | 1.05E-01 | 0.415 | 0.379 | 1.16 | 1.04 | -1.3  | 1.83E-05 | 0.456 | 0.421 | 1.15 | 1.04 | -1.28 | 1.19 | 4.87E-05 | LOC100505878(dist=295408), MIR4280(dist=69699) | intergenic     |
| 4  | 8000943   | C | T | rs34336913             | 5.53E-05 | 0.026 | 0.041 | 0.63 | 0.45 | -0.86 | 2.82E-01 | 0.043 | 0.042 | 1.02 | 0.79 | -1.32 | 0.47 | 4.89E-05 | ABLIM2                                         | intronic       |
| 5  | 86334020  | T | C | rs4269315              | 1.07E-01 | 0.415 | 0.379 | 1.16 | 1.04 | -1.3  | 1.78E-05 | 0.457 | 0.421 | 1.16 | 1.04 | -1.28 | 1.19 | 4.92E-05 | LOC100505878(dist=288431), MIR4280(dist=76676) | intergenic     |
| 6  | 142270178 | C | T | rs4632909              | 1.03E-01 | 0.247 | 0.265 | 0.91 | 0.8  | -1.03 | 2.13E-05 | 0.214 | 0.265 | 0.76 | 0.67 | -0.86 | 0.83 | 4.94E-05 | MIR4465(dist=126515), NMBR(dist=126567)        | intergenic     |
| 17 | 78347664  | A | G | rs4523980              | 5.64E-02 | 0.114 | 0.096 | 0.82 | 0.69 | -0.98 | 5.42E-05 | 0.150 | 0.124 | 0.81 | 0.7  | -0.94 | 0.76 | 5.10E-05 | LOC100294362                                   | ncRNA_intronic |
| 16 | 7597886   | A | T | rs80029446             | 4.29E-05 | 0.032 | 0.056 | 0.55 | 0.41 | -0.73 | 7.25E-02 | 0.039 | 0.048 | 0.80 | 0.62 | -1.05 | 0.66 | 5.17E-05 | RBFOX1                                         | intronic       |
| 6  | 32178570  | C | T | rs17604492             | 6.34E-05 | 0.087 | 0.062 | 1.44 | 1.17 | -1.77 | 6.27E-02 | 0.073 | 0.057 | 1.29 | 1.05 | -1.59 | 1.39 | 5.33E-05 | NOTCH4                                         | exonic         |
| 17 | 78348494  | A | G | rs6565681              | 6.34E-02 | 0.117 | 0.098 | 0.82 | 0.69 | -0.98 | 4.68E-05 | 0.150 | 0.125 | 0.81 | 0.7  | -0.94 | 0.76 | 5.44E-05 | LOC100294362                                   | ncRNA_intronic |
| 7  | 113486274 | T | C | rs6976258              | 2.70E-01 | 0.408 | 0.413 | 0.98 | 0.88 | -1.09 | 2.24E-06 | 0.381 | 0.449 | 0.76 | 0.68 | -0.84 | 0.84 | 5.44E-05 | LINC00998(dist=727637), PPP1R3A(dist=30608)    | intergenic     |
| 19 | 50299408  | T | G | rs2072451              | 9.73E-02 | 0.505 | 0.484 | 1.09 | 0.98 | -1.22 | 4.84E-05 | 0.512 | 0.465 | 1.20 | 1.09 | -1.34 | 1.19 | 5.48E-05 | AP2A1                                          | intronic       |
| 19 | 50305688  | G | C | rs2159984              | 2.02E-01 | 0.412 | 0.392 | 1.09 | 0.97 | -1.22 | 9.09E-06 | 0.424 | 0.373 | 1.24 | 1.11 | -1.37 | 1.18 | 5.49E-05 | AP2A1                                          | intronic       |
| 5  | 86344258  | C | G | rs4289590              | 1.15E-01 | 0.414 | 0.379 | 1.16 | 1.04 | -1.29 | 1.74E-05 | 0.456 | 0.420 | 1.16 | 1.04 | -1.28 | 1.19 | 5.51E-05 | LOC100505878(dist=298669), MIR4280(dist=66438) | intergenic     |
| 9  | 74651012  | T | C | rs4744653              | 9.47E-02 | 0.224 | 0.204 | 0.89 | 0.78 | -1.01 | 4.41E-05 | 0.253 | 0.213 | 0.80 | 0.71 | -0.9  | 0.81 | 5.65E-05 | C9orf85(dist=62641), C9orf57(dist=15285)       | intergenic     |
| 5  | 86349053  | T | C | rs7725587              | 1.26E-01 | 0.415 | 0.380 | 1.15 | 1.03 | -1.29 | 1.55E-05 | 0.456 | 0.420 | 1.16 | 1.   |       |      |          |                                                |                |

|    |           |   |   |             |          |       |       |      |      |       |          |       |       |      |          |       |          |              |                                                |                |
|----|-----------|---|---|-------------|----------|-------|-------|------|------|-------|----------|-------|-------|------|----------|-------|----------|--------------|------------------------------------------------|----------------|
| 12 | 1631911   | A | G | rs12822405  | 8.18E-02 | 0.200 | 0.182 | 1.12 | 0.97 | -1.28 | 6.43E-05 | 0.242 | 0.211 | 1.19 | 1.05     | -1.35 | 1.27     | 6.28E-05     | LINC00942(dist=18321), FBXL14(dist=43248)      | intergenic     |
| 11 | 5440763   | C | T | rs1498475   | 9.84E-02 | 0.345 | 0.337 | 0.96 | 0.86 | -1.08 | 5.77E-05 | 0.373 | 0.313 | 0.77 | 0.69     | -0.86 | 0.84     | 6.42E-05     | OR51B5                                         | intronic       |
| 11 | 5440828   | G | T | rs2736593   | 9.85E-02 | 0.345 | 0.337 | 0.96 | 0.86 | -1.08 | 5.77E-05 | 0.373 | 0.313 | 0.77 | 0.69     | -0.86 | 0.84     | 6.42E-05     | OR51B5                                         | intronic       |
| 11 | 5441842   | C | T | rs2736592   | 9.85E-02 | 0.345 | 0.337 | 0.96 | 0.86 | -1.08 | 5.78E-05 | 0.373 | 0.313 | 0.77 | 0.69     | -0.86 | 0.84     | 6.44E-05     | OR51B5                                         | intronic       |
| 11 | 5442129   | A | C | rs2647575   | 9.85E-02 | 0.345 | 0.337 | 0.96 | 0.86 | -1.08 | 5.79E-05 | 0.373 | 0.313 | 0.77 | 0.69     | -0.86 | 0.84     | 6.45E-05     | OR51B5                                         | intronic       |
| 1  | 81084184  | A | G | rs72933061  | 5.53E-05 | 0.119 | 0.091 | 1.35 | 1.13 | -1.61 | 9.98E-02 | 0.108 | 0.093 | 1.19 | 1 - 1.41 | 1.34  | 6.47E-05 | LOC101927412 | ncRNA_intronic                                 |                |
| 16 | 7598054   | T | C | rs17144095  | 5.36E-05 | 0.035 | 0.059 | 0.59 | 0.45 | -0.77 | 7.34E-02 | 0.038 | 0.047 | 0.80 | 0.62     | -1.05 | 0.67     | 6.48E-05     | RBFOX1                                         | intronic       |
| 9  | 36138332  | C | G | rs7037771   | 1.02E-05 | 0.075 | 0.050 | 1.55 | 1.24 | -1.95 | 1.84E-01 | 0.067 | 0.056 | 1.21 | 0.98     | -1.49 | 1.44     | 6.49E-05     | GLIPR2                                         | intronic       |
| 6  | 31596675  | A | G | rs2736165   | 1.61E-01 | 0.148 | 0.139 | 1.08 | 0.92 | -1.26 | 1.43E-05 | 0.174 | 0.127 | 1.45 | 1.26     | -1.67 | 1.26     | 6.50E-05     | PRRC2A                                         | intronic       |
| 11 | 5434665   | A | G | rs10742671  | 1.14E-01 | 0.351 | 0.343 | 0.97 | 0.86 | -1.08 | 4.83E-05 | 0.377 | 0.317 | 0.77 | 0.69     | -0.86 | 0.84     | 6.89E-05     | OR51B5                                         | intronic       |
| 11 | 5440665   | A | T | rs1498476   | 1.04E-01 | 0.346 | 0.337 | 0.96 | 0.86 | -1.08 | 5.72E-05 | 0.373 | 0.314 | 0.77 | 0.69     | -0.86 | 0.84     | 6.89E-05     | OR51B5                                         | intronic       |
| 6  | 14764738  | G | A | rs747487    | 4.04E-07 | 0.359 | 0.404 | 0.83 | 0.74 | -0.93 | 5.39E-01 | 0.393 | 0.421 | 0.89 | 0.8      | -0.99 | 0.83     | 6.99E-05     | LINC01108(dist=479053), JARID2(dist=481468)    | intergenic     |
| 8  | 50865341  | T | C | rs11786880  | 6.66E-02 | 0.061 | 0.051 | 1.20 | 0.95 | -1.52 | 5.95E-05 | 0.071 | 0.052 | 1.40 | 1.13     | -1.72 | 1.48     | 7.03E-05     | SNTG1                                          | intronic       |
| 11 | 5440620   | A | G | rs1498477   | 1.00E-01 | 0.347 | 0.338 | 0.96 | 0.86 | -1.08 | 6.36E-05 | 0.374 | 0.315 | 0.77 | 0.69     | -0.86 | 0.85     | 7.05E-05     | OR51B5                                         | intronic       |
| 19 | 3400753   | T | C | rs145253484 | 5.64E-05 | 0.061 | 0.089 | 0.66 | 0.53 | -0.82 | 1.58E-01 | 0.071 | 0.074 | 0.96 | 0.79     | -1.18 | 0.62     | 7.06E-05     | NFIC                                           | intronic       |
| 13 | 97665992  | G | T | rs9582096   | 1.07E-01 | 0.071 | 0.061 | 1.18 | 0.95 | -1.47 | 3.86E-05 | 0.082 | 0.054 | 1.56 | 1.28     | -1.9  | 1.39     | 7.06E-05     | OXGR1(dist=19388), LINC00456(dist=158644)      | intergenic     |
| 1  | 231985633 | T | C | rs6677522   | 1.06E-01 | 0.078 | 0.088 | 1.14 | 0.94 | -1.4  | 4.00E-05 | 0.064 | 0.095 | 1.52 | 1.24     | -1.86 | 1.34     | 7.06E-05     | TSNAX-DISC1                                    | ncRNA_intronic |
| 11 | 5433603   | G | C | rs7106233   | 1.01E-01 | 0.345 | 0.336 | 0.96 | 0.86 | -1.08 | 6.32E-05 | 0.373 | 0.313 | 0.77 | 0.69     | -0.86 | 0.84     | 7.17E-05     | OR51B5                                         | intronic       |
| 1  | 231985728 | T | C | rs6677638   | 1.08E-01 | 0.076 | 0.086 | 1.15 | 0.94 | -1.41 | 4.01E-05 | 0.064 | 0.095 | 1.52 | 1.24     | -1.86 | 1.34     | 7.18E-05     | TSNAX-DISC1                                    | ncRNA_intronic |
| 6  | 32483100  | T | G | rs187381944 | 3.72E-05 | 0.102 | 0.128 | 0.78 | 0.65 | -0.92 | 6.27E-02 | 0.123 | 0.143 | 0.84 | 0.72     | -0.99 | 0.73     | 7.18E-05     | HLA-DRA(dist=70274), HLA-DRB5(dist=2054)       | intergenic     |
| 11 | 5430411   | G | T | rs975116    | 1.11E-01 | 0.373 | 0.365 | 0.97 | 0.86 | -1.08 | 5.67E-05 | 0.407 | 0.343 | 0.76 | 0.68     | -0.85 | 0.85     | 7.30E-05     | OR51B5                                         | intronic       |
| 19 | 3395281   | C | T | rs146964342 | 5.86E-05 | 0.061 | 0.088 | 0.67 | 0.54 | -0.83 | 1.68E-01 | 0.072 | 0.074 | 0.97 | 0.79     | -1.19 | 0.62     | 7.32E-05     | NFIC                                           | intronic       |
| 8  | 39046611  | G | A | rs57494041  | 1.43E-01 | 0.094 | 0.087 | 1.08 | 0.9  | -1.31 | 1.77E-05 | 0.114 | 0.081 | 1.45 | 1.23     | -1.72 | 1.36     | 7.37E-05     | ADAM32                                         | intronic       |
| 5  | 86355569  | A | C | rs78189769  | 2.71E-01 | 0.273 | 0.297 | 0.89 | 0.79 | -1    | 2.91E-06 | 0.234 | 0.275 | 0.81 | 0.72     | -0.91 | 0.83     | 7.38E-05     | LOC100505878(dist=309980), MIR4280(dist=55127) | intergenic     |
| 21 | 34031856  | C | T | rs845006    | 1.47E-06 | 0.115 | 0.161 | 0.68 | 0.58 | -0.8  | 4.33E-01 | 0.132 | 0.136 | 0.97 | 0.83     | -1.13 | 0.79     | 7.40E-05     | SYNJ1                                          | intronic       |
| 1  | 231987129 | A | G | rs9432014   | 1.11E-01 | 0.075 | 0.086 | 1.15 | 0.94 | -1.41 | 4.11E-05 | 0.064 | 0.094 | 1.52 | 1.23     | -1.86 | 1.34     | 7.59E-05     | TSNAX-DISC1                                    | ncRNA_intronic |
| 17 | 32566741  | G | A | rs62054927  | 6.39E-05 | 0.080 | 0.056 | 1.46 | 1.17 | -1.81 | 1.04E-01 | 0.073 | 0.067 | 1.10 | 0.9      | -1.34 | 1.50     | 7.61E-05     | LOC101927239(dist=56090), CCL2(dist=15555)     | intergenic     |
| 6  | 6841568   | G | A | rs7741029   | 6.16E-05 | 0.075 | 0.055 | 1.39 | 1.12 | -1.74 | 7.59E-02 | 0.075 | 0.064 | 1.19 | 0.97     | -1.46 | 1.53     | 7.62E-05     | LY86(dist=186352), RREB1(dist=266262)          | intergenic     |
| 13 | 97668063  | A | G | rs10161685  | 1.10E-01 | 0.071 | 0.061 | 1.18 | 0.94 | -1.47 | 4.07E-05 | 0.082 | 0.054 | 1.56 | 1.27     | -1.9  | 1.38     | 7.63E-05     | OXGR1(dist=21459), LINC00456(dist=156573)      | intergenic     |
| 21 | 47363376  | C | T | rs368033    | 8.77E-02 | 0.422 | 0.403 | 1.08 | 0.97 | -1.21 | 6.48E-05 | 0.439 | 0.386 | 1.24 | 1.12     | -1.38 | 1.18     | 7.66E-05     | PCBP3(dist=1008), LOC101928796(dist=29508)     | intergenic     |
| 19 | 416834    | A | G | rs15971     | 6.13E-05 | 0.277 | 0.330 | 0.78 | 0.69 | -0.87 | 7.29E-01 | 0.317 | 0.306 | 1.05 | 0.94     | -1.18 | 0.76     | 7.66E-05     | SHC2(NM_012435:c.*494T>C)                      | UTR3           |
| 6  | 3160304   | G | C | rs2736158   | 1.92E-01 | 0.145 | 0.136 | 1.08 | 0.92 | -1.26 | 1.22E-05 | 0.174 | 0.127 | 1.46 | 1.26     | -1.68 | 1.26     | 7.66E-05     | PRRC2A                                         | exonic         |
| 11 | 125615464 | C | T | rs489063    | 1.17E-01 | 0.107 | 0.092 | 1.05 | 0.71 | -1.02 | 5.71E-05 | 0.125 | 0.097 | 0.75 | 0.64     | -0.88 | 0.77     | 7.67E-05     | PATE1                                          | upstream       |
| 1  | 1040824   | T | C | rs6656379   | 1.92E-01 | 0.478 | 0.476 | 1.01 | 0.9  | -1.12 | 1.46E-05 | 0.494 | 0.424 | 1.33 | 1.2      | -1.48 | 1.18     | 7.67E-05     | C1orf159                                       | intronic       |
| 10 | 61801020  | T | C | rs2393576   | 3.10E-06 | 0.149 | 0.095 | 1.66 | 1.41 | -1.97 | 1.62E-01 | 0.140 | 0.138 | 1.02 | 0.88     | -1.18 | 1.30     | 7.73E-05     | ANK3                                           | intronic       |
| 19 | 50315423  | G | A | rs8104825   | 2.22E-01 | 0.389 | 0.370 | 1.09 | 0.97 | -1.22 | 1.41E-05 | 0.401 | 0.353 | 1.23 | 1.1      | -1.37 | 1.18     | 7.75E-05     | FUZ                                            | intronic       |
| 11 | 125619935 | A | C | rs574676    | 1.10E-01 | 0.105 | 0.090 | 0.85 | 0.7  | -1.02 | 6.06E-05 | 0.124 | 0.097 | 0.76 | 0.65     | -0.89 | 0.77     | 7.80E-05     | PATE1                                          | downstream     |
| 20 | 57962789  | C | T | rs753042    | 5.41E-05 | 0.373 | 0.327 | 0.82 | 0.73 | -0.92 | 4.74E-01 | 0.361 | 0.349 | 0.95 | 0.85     | -1.06 | 0.77     | 7.88E-05     | EDN3(dist=61742), PHACTR3(dist=189775)         | intergenic     |
| 1  | 25604290  | C | T | rs189106045 | 5.66E-05 | 0.032 | 0.051 | 0.61 | 0.46 | -0.81 | 3.00E-02 | 0.046 | 0.038 | 1.23 | 0.96     | -1.59 | 0.48     | 7.90E-05     | RHD                                            | intronic       |
| 6  | 31585692  | A | G | rs2857696   | 2.22E-01 | 0.144 | 0.136 | 1.07 | 0.91 | -1.25 | 8.65E-06 | 0.174 | 0.126 | 1.46 | 1.27     | -1.69 | 1.26     | 7.91E-05     | AIF1                                           | downstream     |
| 11 | 125617467 | G | T | rs495356    | 1.29E-01 | 0.105 | 0.091 | 0.85 | 0.71 | -1.02 | 5.06E-05 | 0.125 | 0.097 | 0.75 | 0.64     | -0.88 | 0.77     | 7.95E-05     | PATE1                                          | intronic       |
| 2  | 18448477  | A | G | rs10195586  | 1.96E-01 | 0.117 | 0.108 | 1.09 | 0.92 | -1.3  | 6.68E-06 | 0.139 | 0.101 | 1.44 | 1.23     | -1.68 | 1.29     | 8.04E-05     | KCNK3(dist=334252), RDH14(dist=287512)         | intergenic     |
| 1  | 1056715   | C | T | rs7538862   | 2.06E-01 | 0.477 | 0.477 | 1.00 | 0.9  | -1.12 | 1.01E-05 | 0.473 | 0.403 | 1.33 | 1.2      | -1.47 | 1.18     | 8.07E-05     | C1orf159(dist=4979), LINC01342(dist=15682)     | intergenic     |
| 13 | 48115127  | G | A | rs2406428   | 7.29E-06 | 0.079 | 0.123 | 0.61 | 0.51 | -0.74 | 2.55E-01 | 0.092 | 0.094 | 0.98 | 0.82     | -1.17 | 0.76     | 8.08E-05     | HTR2A(dist=643916), LINC00562(dist=389161)     | intergenic     |
| 13 | 97675959  | C | T | rs12858533  | 1.15E-01 | 0.071 | 0.061 | 1.17 | 0.94 | -1.46 | 3.71E-05 | 0.081 | 0.054 | 1.56 | 1.27     | -1.9  | 1.39     | 8.10E-05     | OXGR1(dist=29355), LINC00456(dist=148677)      | intergenic     |
| 8  | 50846956  | G | A | rs74546587  | 1.60E-01 | 0.065 | 0.057 | 1.14 | 0.91 | -1.44 | 1.39E-05 | 0.081 | 0.058 | 1.44 | 1.18     | -1.75 | 1.44     | 8.14E-05     | SNTG1                                          | intronic       |
| 13 | 97672631  | C | G | rs16953799  | 1.15E-01 | 0.071 | 0.061 | 1.17 | 0.94 | -1.46 | 4.05E-05 | 0.081 | 0.054 | 1.56 | 1.27     | -1.9  | 1.38     | 8.15E-05     | OXGR1(dist=26027), LINC00456(dist=152005)      | intergenic     |
| 16 | 87818569  | A | G | rs6540080   | 4.24E-05 | 0.121 | 0.082 | 1.55 | 1.29 | -1.86 | 9.57E-01 | 0.152 | 0.160 | 0.94 | 0.81     | -1.08 | 1.61     | 8.15E-05     | LOC102724467(dist=5815), SLC7A5(dist=45060)    | intergenic     |
| 17 | 40489758  | A | G | rs12721583  | 4.98E-01 | 0.085 | 0.077 | 1.11 | 0.91 | -1.35 | 4.96E-06 | 0.088 | 0.057 | 1.61 | 1.32     | -1.95 | 1.37     | 8.16E-05     | STAT3                                          | intronic       |
| 16 | 23371564  | A | C | rs112405666 | 1.29E-05 | 0.135 | 0.173 | 0.75 | 0.64 | -0.87 | 7.98E-01 | 0.144 | 0.135 | 1.08 | 0.93     | -1.25 | 0.65     | 8.25E-05     | SCNN1B                                         | intronic       |
| 6  | 5378963   | A | G | rs77354171  | 1.06E-01 | 0.036 | 0.031 | 1.18 | 0.87 | -1.6  | 2.80E-05 | 0.043 | 0.025 | 1.77 | 1.34     | -2.34 | 1.66     | 8.26E-05     | FARS2                                          | intronic       |
| 13 | 97682894  | T | G | rs11069252  | 1.16E-01 | 0.071 | 0.061 | 1.17 | 0.94 | -1.46 | 3.81E-05 | 0.081 | 0.054 | 1.56 | 1.27     | -1.9  | 1.39     | 8.29E-05     | OXGR1(dist=36290), LINC00456(dist=141742)      | intergenic     |
| 3  | 138132434 | C | T | rs1871516   | 6.12E-06 | 0.440 | 0.381 | 0.78 | 0.7  | -0.87 | 3.53E-01 | 0.401 | 0.390 | 0.95 | 0.86     | -1.06 | 0.85     | 8.33E-05     | MRAS(dist=8057), ESYT3(dist=20981)             | intergenic     |
| 10 | 64493222  | A | C | rs224050    | 1.14E-01 | 0.240 | 0.209 | 0.84 | 0.73 | -0.95 | 6.05E-05 | 0.272 | 0.235 | 0.82 | 0.73     | -0.92 | 0.82     | 8.39E-05     | ZNF365(dist=61451), ADO(dist=71294)            | intergenic     |
| 11 | 125614454 | G | C | rs543475    | 1.26E-01 | 0.106 | 0.091 | 0.85 | 0.7  | -1.01 | 5.45E-05 | 0.125 | 0.097 | 0.75 | 0.64     | -0.88 | 0.77     | 8.42E-05     | ACRV1(dist=63661), PATE1(dist=1734)            | intergenic     |
| 11 | 125616502 | T | A | rs2553829   | 1.28E-01 | 0.106 | 0.091 | 0.85 | 0.71 | -1.02 | 5.50E-05 | 0.125 | 0.097 | 0.75 | 0.64     | -0.88 | 0.77     | 8.47E-05     | PATE1                                          | intronic       |
| 11 | 125614173 | A | G | rs472524    | 1.26E-01 | 0.106 | 0.091 | 0.85 | 0.7  | -1.01 | 5.49E-05 | 0.125 | 0.097 | 0.75 | 0.64     | -0.88 | 0.77     | 8.49E-05     | ACRV1(dist=63380), PATE1(dist=2015)            | intergenic     |
| 14 | 77151803  | G | T | rs12587318  | 1.37E-01 | 0.152 | 0.137 | 1.13 | 0.97 | -1.32 | 3.91E-05 | 0.162 | 0.128 | 1.32 | 1.14     | -1.52 | 1.26     | 8.52E-05     | ESRR                                           |                |

|    |           |   |   |                       |          |       |       |      |      |       |          |       |       |      |      |       |      |          |                                                |                     |
|----|-----------|---|---|-----------------------|----------|-------|-------|------|------|-------|----------|-------|-------|------|------|-------|------|----------|------------------------------------------------|---------------------|
| 14 | 77148101  | G | A | rs12434722            | 1.43E-01 | 0.151 | 0.137 | 1.13 | 0.97 | -1.32 | 3.86E-05 | 0.162 | 0.128 | 1.32 | 1.14 | -1.52 | 1.26 | 8.96E-05 | ESRRB(dist=179921), VASH1(dist=80134)          | intergenic          |
| 9  | 116104500 | G | A | rs12380548            | 2.48E-05 | 0.013 | 0.025 | 0.51 | 0.33 | -0.79 | 5.51E-02 | 0.036 | 0.050 | 0.72 | 0.55 | -0.94 | 0.61 | 9.00E-05 | WDR31(dist=1880), BSPRY(dist=7312)             | intergenic          |
| 13 | 97684904  | C | T | rs9584472             | 1.20E-01 | 0.071 | 0.061 | 1.17 | 0.94 | -1.46 | 4.06E-05 | 0.081 | 0.053 | 1.55 | 1.27 | -1.9  | 1.38 | 9.04E-05 | OXGR1(dist=38300), LINC00456(dist=139732)      | intergenic          |
| 11 | 5434112   | A | G | rs10838064            | 2.11E-01 | 0.424 | 0.422 | 0.99 | 0.89 | -1.1  | 1.59E-05 | 0.456 | 0.394 | 0.78 | 0.7  | -0.86 | 0.84 | 9.04E-05 | OR51B5                                         | intronic            |
| 6  | 31629211  | C | T | rs805261              | 1.52E-01 | 0.126 | 0.117 | 1.09 | 0.92 | -1.29 | 2.63E-05 | 0.152 | 0.109 | 1.46 | 1.26 | -1.7  | 1.28 | 9.06E-05 | GPANK1                                         | UTR3                |
| 5  | 124302505 | C | T | rs139618815           | 5.11E-06 | 0.085 | 0.126 | 0.65 | 0.54 | -0.78 | 2.90E-01 | 0.105 | 0.109 | 0.96 | 0.81 | -1.14 | 0.76 | 9.07E-05 | ZNF608(dist=221700), LOC101927421(dist=70019)  | intergenic          |
| 10 | 64492433  | T | A | rs224049;rs386744585  | 1.20E-01 | 0.240 | 0.209 | 0.84 | 0.73 | -0.95 | 6.01E-05 | 0.272 | 0.235 | 0.82 | 0.73 | -0.92 | 0.82 | 9.18E-05 | ZNF365(dist=60662), ADO(dist=72083)            | intergenic          |
| 6  | 31622893  | T | C | rs805296              | 1.53E-01 | 0.126 | 0.117 | 1.09 | 0.92 | -1.29 | 2.66E-05 | 0.152 | 0.109 | 1.46 | 1.26 | -1.7  | 1.28 | 9.21E-05 | APOM                                           | intronic            |
| 6  | 31605167  | G | A | rs2255741             | 2.01E-01 | 0.145 | 0.136 | 1.07 | 0.92 | -1.26 | 1.46E-05 | 0.174 | 0.127 | 1.45 | 1.26 | -1.67 | 1.25 | 9.24E-05 | PRRC2A                                         | intronic            |
| 14 | 34675672  | C | T | rs79159781            | 3.65E-05 | 0.119 | 0.087 | 1.42 | 1.19 | -1.7  | 1.24E-01 | 0.123 | 0.114 | 1.09 | 0.93 | -1.28 | 1.33 | 9.28E-05 | EGLN3(dist=255388), SPTSSA(dist=226472)        | intergenic          |
| 13 | 97692264  | A | G | rs35152259            | 1.26E-01 | 0.070 | 0.061 | 1.17 | 0.94 | -1.45 | 3.79E-05 | 0.081 | 0.054 | 1.55 | 1.27 | -1.9  | 1.38 | 9.37E-05 | OXGR1(dist=45660), LINC00456(dist=132372)      | intergenic          |
| 17 | 40541534  | A | G | rs45494601            | 1.57E-01 | 0.087 | 0.078 | 1.12 | 0.92 | -1.37 | 7.78E-06 | 0.085 | 0.056 | 1.57 | 1.29 | -1.91 | 1.37 | 9.47E-05 | STAT3(dist=1021), PTRF(dist=12933)             | intergenic          |
| 1  | 1049950   | A | G | rs12726255            | 2.14E-01 | 0.477 | 0.477 | 1.00 | 0.9  | -1.12 | 1.38E-05 | 0.485 | 0.415 | 1.33 | 1.2  | -1.47 | 1.18 | 9.60E-05 | C1orf159                                       | intronic            |
| 13 | 48115586  | C | G | rs17070273            | 4.73E-05 | 0.113 | 0.158 | 0.67 | 0.57 | -0.79 | 1.34E-01 | 0.120 | 0.123 | 0.97 | 0.83 | -1.14 | 0.78 | 9.72E-05 | HTR2A(dist=644375), LINC00562(dist=388702)     | intergenic          |
| 5  | 86352991  | T | C | rs7709213             | 1.05E-01 | 0.394 | 0.360 | 1.16 | 1.03 | -1.3  | 5.31E-05 | 0.431 | 0.400 | 1.14 | 1.02 | -1.26 | 1.19 | 9.76E-05 | LOC100505878(dist=307402), MIR4280(dist=57705) | intergenic          |
| 9  | 21354655  | C | T | rs616873              | 1.65E-01 | 0.327 | 0.316 | 1.05 | 0.94 | -1.18 | 3.82E-05 | 0.347 | 0.297 | 1.26 | 1.13 | -1.4  | 1.19 | 9.78E-05 | IFNA6(dist=3769), IFNA13(dist=12716)           | intergenic          |
| 5  | 86357223  | T | G | rs57580217            | 2.82E-01 | 0.276 | 0.300 | 0.89 | 0.79 | -1    | 4.25E-06 | 0.239 | 0.278 | 0.81 | 0.72 | -0.92 | 0.84 | 9.80E-05 | LOC100505878(dist=311634), MIR4280(dist=53473) | intergenic          |
| 6  | 31623873  | G | A | rs805264              | 2.23E-01 | 0.145 | 0.137 | 1.07 | 0.91 | -1.25 | 1.27E-05 | 0.174 | 0.126 | 1.46 | 1.26 | -1.68 | 1.25 | 9.91E-05 | APOM                                           | intronic            |
| 19 | 50300026  | A | G | rs28413128            | 1.86E-01 | 0.417 | 0.396 | 1.09 | 0.97 | -1.22 | 3.33E-05 | 0.430 | 0.382 | 1.22 | 1.1  | -1.35 | 1.18 | 1.01E-04 | AP2A1                                          | intronic            |
| 6  | 31598293  | G | A | rs2736161             | 2.22E-01 | 0.145 | 0.137 | 1.07 | 0.91 | -1.25 | 1.31E-05 | 0.174 | 0.127 | 1.46 | 1.26 | -1.68 | 1.25 | 1.01E-04 | PRRC2A                                         | intronic            |
| 14 | 85141701  | C | T | rs116330927           | 4.67E-05 | 0.014 | 0.030 | 0.48 | 0.32 | -0.72 | 1.45E-01 | 0.018 | 0.021 | 0.85 | 0.58 | -1.25 | 0.52 | 1.02E-04 | NONE(dist=NONE), LINC00911(dist=718522)        | intergenic          |
| 1  | 1054893   | T | C | rs4970412;rs386627442 | 2.10E-01 | 0.477 | 0.477 | 1.00 | 0.9  | -1.12 | 1.45E-05 | 0.477 | 0.408 | 1.32 | 1.19 | -1.47 | 1.18 | 1.03E-04 | C1orf159(dist=3157), LINC01342(dist=17504)     | intergenic          |
| 11 | 125609409 | T | A | rs550623              | 1.50E-01 | 0.105 | 0.091 | 0.85 | 0.71 | -1.02 | 5.00E-05 | 0.125 | 0.096 | 0.75 | 0.64 | -0.88 | 0.77 | 1.03E-04 | ACRV1(dist=58616), PATE1(dist=6779)            | intergenic          |
| 11 | 125609198 | T | C | rs486245              | 1.51E-01 | 0.105 | 0.091 | 0.85 | 0.71 | -1.02 | 5.02E-05 | 0.125 | 0.096 | 0.75 | 0.64 | -0.88 | 0.77 | 1.04E-04 | ACRV1(dist=58405), PATE1(dist=6990)            | intergenic          |
| 16 | 23371900  | G | T | rs8051071             | 5.53E-05 | 0.164 | 0.203 | 0.77 | 0.67 | -0.89 | 5.54E-01 | 0.172 | 0.161 | 1.09 | 0.95 | -1.25 | 0.67 | 1.04E-04 | SCNN1B                                         | intronic            |
| 2  | 201577230 | A | G | rs142065563           | 4.38E-05 | 0.034 | 0.020 | 1.72 | 1.23 | -2.42 | 1.73E-01 | 0.026 | 0.020 | 1.29 | 0.92 | -1.8  | 1.85 | 1.06E-04 | LOC100507140                                   | ncRNA_exonic        |
| 6  | 31644090  | C | G | rs805270              | 2.51E-01 | 0.144 | 0.137 | 1.06 | 0.91 | -1.24 | 1.02E-05 | 0.175 | 0.127 | 1.46 | 1.27 | -1.68 | 1.25 | 1.06E-04 | LY6G5C                                         | downstream          |
| 4  | 77746642  | T | C | rs1389249             | 3.10E-05 | 0.224 | 0.175 | 0.74 | 0.64 | -0.85 | 1.84E-01 | 0.218 | 0.213 | 0.97 | 0.86 | -1.1  | 0.82 | 1.06E-04 | SHROOM3(dist=42237), SOWAHD(dist=69440)        | intergenic          |
| 6  | 31641386  | G | T | rs805272              | 2.51E-01 | 0.144 | 0.137 | 1.06 | 0.91 | -1.24 | 1.03E-05 | 0.175 | 0.127 | 1.46 | 1.27 | -1.68 | 1.25 | 1.06E-04 | LY6G5B(dist=1159), LY6G5C(dist=3075)           | intergenic          |
| 10 | 55226154  | T | G | rs4935440             | 1.38E-01 | 0.101 | 0.085 | 1.21 | 1.01 | -1.46 | 3.08E-05 | 0.105 | 0.080 | 1.34 | 1.13 | -1.6  | 1.36 | 1.06E-04 | MBL2(dist=694694), PCDH15(dist=336379)         | intergenic          |
| 1  | 35333126  | T | C | rs12727066            | 1.23E-01 | 0.273 | 0.300 | 0.87 | 0.77 | -0.99 | 3.99E-05 | 0.229 | 0.263 | 0.83 | 0.74 | -0.94 | 0.83 | 1.07E-04 | DLGAP3                                         | intronic            |
| 5  | 86360653  | A | G | rs2974023             | 3.03E-01 | 0.275 | 0.298 | 0.89 | 0.79 | -1.01 | 3.86E-06 | 0.236 | 0.276 | 0.81 | 0.72 | -0.92 | 0.84 | 1.07E-04 | LOC100505878(dist=315064), MIR4280(dist=50043) | intergenic          |
| 6  | 31633552  | C | T | rs805258              | 2.39E-01 | 0.144 | 0.136 | 1.07 | 0.91 | -1.25 | 1.14E-05 | 0.172 | 0.125 | 1.46 | 1.26 | -1.68 | 1.25 | 1.08E-04 | GPANK1                                         | UTR5                |
| 21 | 33996278  | T | C | rs845011              | 1.02E-05 | 0.125 | 0.168 | 0.71 | 0.6  | -0.83 | 2.96E-01 | 0.133 | 0.138 | 0.96 | 0.82 | -1.12 | 0.79 | 1.08E-04 | C21orf59(dist=11360), SYNJ1(dist=4791)         | intergenic          |
| 11 | 5433900   | G | C | rs7109708             | 1.74E-01 | 0.379 | 0.374 | 0.98 | 0.88 | -1.1  | 3.79E-05 | 0.407 | 0.348 | 0.78 | 0.7  | -0.86 | 0.85 | 1.08E-04 | OR51B5                                         | intronic            |
| 17 | 40523932  | C | T | rs141779413           | 2.40E-01 | 0.090 | 0.084 | 1.09 | 0.9  | -1.32 | 4.95E-06 | 0.098 | 0.065 | 1.56 | 1.3  | -1.88 | 1.34 | 1.08E-04 | STAT3                                          | intronic            |
| 19 | 20404935  | T | C | rs4309516             | 2.19E-01 | 0.287 | 0.280 | 1.04 | 0.92 | -1.17 | 2.15E-05 | 0.299 | 0.247 | 1.30 | 1.16 | -1.46 | 1.20 | 1.09E-04 | ZNF486(dist=93636), MIR1270(dist=105146)       | intergenic          |
| 10 | 51467783  | G | C | rs61850065            | 3.54E-05 | 0.251 | 0.201 | 1.33 | 1.17 | -1.51 | 9.95E-01 | 0.244 | 0.252 | 0.96 | 0.85 | -1.08 | 1.48 | 1.11E-04 | AGAP7P                                         | ncRNA_intronic      |
| 11 | 125605212 | C | T | rs2553841             | 1.58E-01 | 0.105 | 0.091 | 0.86 | 0.71 | -1.03 | 4.95E-05 | 0.124 | 0.096 | 0.75 | 0.64 | -0.88 | 0.77 | 1.11E-04 | ACRV1(dist=54419), PATE1(dist=10976)           | intergenic          |
| 6  | 31638178  | A | C | rs805268              | 2.48E-01 | 0.145 | 0.137 | 1.06 | 0.91 | -1.25 | 1.14E-05 | 0.176 | 0.128 | 1.45 | 1.26 | -1.67 | 1.25 | 1.12E-04 | LY6G5B;CSNK2B                                  | upstream;downstream |
| 8  | 105390001 | A | G | rs78737380            | 2.63E-05 | 0.055 | 0.036 | 1.55 | 1.19 | -2.01 | 1.09E-01 | 0.055 | 0.044 | 1.27 | 1    | -1.6  | 1.47 | 1.13E-04 | DCSTAMP(dist=21084), DPYS(dist=1651)           | intergenic          |
| 11 | 125603301 | G | A | rs549994              | 1.60E-01 | 0.105 | 0.091 | 0.86 | 0.71 | -1.03 | 4.94E-05 | 0.124 | 0.096 | 0.75 | 0.64 | -0.88 | 0.77 | 1.14E-04 | ACRV1(dist=52508), PATE1(dist=12887)           | intergenic          |
| 11 | 125606641 | T | C | rs515840              | 1.64E-01 | 0.105 | 0.091 | 0.86 | 0.71 | -1.03 | 4.86E-05 | 0.125 | 0.097 | 0.75 | 0.64 | -0.88 | 0.77 | 1.17E-04 | ACRV1(dist=55848), PATE1(dist=9547)            | intergenic          |
| 2  | 74071151  | C | T | rs1036113             | 1.43E-01 | 0.347 | 0.310 | 0.84 | 0.75 | -0.95 | 3.68E-05 | 0.407 | 0.379 | 0.89 | 0.8  | -0.99 | 0.84 | 1.17E-04 | STAMP                                          | intronic            |
| 14 | 85308328  | A | G | rs17120306            | 5.62E-06 | 0.049 | 0.032 | 1.55 | 1.18 | -2.05 | 4.09E-01 | 0.029 | 0.026 | 1.14 | 0.84 | -1.56 | 1.77 | 1.17E-04 | NONE(dist=NONE), LINC00911(dist=551895)        | intergenic          |
| 7  | 38037354  | G | A | rs4257933             | 3.75E-01 | 0.369 | 0.351 | 1.08 | 0.96 | -1.21 | 2.77E-06 | 0.414 | 0.358 | 1.27 | 1.14 | -1.41 | 1.18 | 1.19E-04 | EPDR1(dist=45812), STARD3NL(dist=180454)       | intergenic          |
| 13 | 48092853  | G | A | rs9595729             | 6.50E-06 | 0.073 | 0.116 | 0.60 | 0.5  | -0.73 | 3.03E-01 | 0.090 | 0.091 | 0.99 | 0.82 | -1.18 | 0.76 | 1.23E-04 | HTR2A(dist=621642), LINC00562(dist=411435)     | intergenic          |
| 6  | 31492295  | C | T | rs3093989             | 6.18E-05 | 0.187 | 0.226 | 1.27 | 1.11 | -1.45 | 1.03E-01 | 0.205 | 0.228 | 1.14 | 1.01 | -1.3  | 1.22 | 1.25E-04 | MICB(dist=13394), MCCD1(dist=4444)             | intergenic          |
| 10 | 51463695  | G | A | rs10995905            | 4.04E-05 | 0.186 | 0.142 | 1.38 | 1.19 | -1.6  | 5.32E-01 | 0.182 | 0.186 | 0.97 | 0.85 | -1.11 | 1.60 | 1.25E-04 | TIMM23B                                        | intronic            |
| 8  | 50819728  | C | T | rs318850              | 2.84E-01 | 0.433 | 0.436 | 1.01 | 0.91 | -1.13 | 1.07E-05 | 0.456 | 0.385 | 0.75 | 0.67 | -0.83 | 0.85 | 1.26E-04 | C8orf22(dist=831086), SNTG1(dist=2621)         | intergenic          |
| 19 | 20401367  | T | A | rs11668982            | 2.63E-01 | 0.284 | 0.278 | 1.03 | 0.91 | -1.16 | 1.74E-05 | 0.299 | 0.248 | 1.30 | 1.16 | -1.46 | 1.20 | 1.28E-04 | ZNF486(dist=90068), MIR1270(dist=108714)       | intergenic          |
| 12 | 66991845  | G | A | rs139411691           | 2.21E-05 | 0.036 | 0.064 | 0.55 | 0.42 | -0.71 | 2.74E-01 | 0.037 | 0.041 | 0.91 | 0.69 | -1.19 | 0.69 | 1.28E-04 | GRIP1                                          | intronic            |
| 5  | 13920898  | T | C | rs6885732             | 1.86E-01 | 0.455 | 0.432 | 0.91 | 0.82 | -1.02 | 2.71E-05 | 0.496 | 0.448 | 0.83 | 0.74 | -0.92 | 0.86 | 1.30E-04 | DNAH5                                          | intronic            |
| 17 | 40543377  | C | T | rs114422057           | 1.69E-01 | 0.075 | 0.067 | 1.13 | 0.91 | -1.39 | 1.92E-05 | 0.080 | 0.052 | 1.59 | 1.3  | -1.95 | 1.37 | 1.30E-04 | STAT3(dist=2864), PTRF(dist=11090)             | intergenic          |
| 19 | 50315773  | T | A | rs2305918             | 2.39E-01 | 0.393 | 0.373 | 1.09 | 0.97 | -1.22 | 2.55E-05 | 0.405 | 0.359 | 1.21 | 1.09 | -1.35 | 1.18 | 1.33E-04 | FUZ                                            | intergenic          |
| 12 | 66990878  | T | C | rs76209224            | 2.33E-05 | 0.036 | 0.064 | 0.55 | 0.42 | -0.71 | 2.75E-01 | 0.037 | 0.041 | 0.91 | 0.69 | -1.19 | 0.69 | 1.33E-04 | GRIP1                                          | intronic            |
| 21 | 34021152  | G | A | rs860942              | 4.55E-06 | 0.115 | 0.158 | 0.69 | 0.59 | -0.81 | 4.18E-01 | 0.130 |       |      |      |       |      |          |                                                |                     |



|    |           |   |   |                      |          |       |       |      |      |       |          |       |       |      |      |       |      |          |                                                 |                |
|----|-----------|---|---|----------------------|----------|-------|-------|------|------|-------|----------|-------|-------|------|------|-------|------|----------|-------------------------------------------------|----------------|
| 8  | 50846338  | G | A | rs318874             | 3.71E-01 | 0.434 | 0.441 | 0.97 | 0.87 | -1.09 | 5.55E-06 | 0.464 | 0.391 | 1.35 | 1.22 | -1.5  | 1.17 | 1.40E-04 | SNTG1                                           | intronic       |
| 21 | 34020653  | A | G | rs10470165           | 4.97E-06 | 0.115 | 0.158 | 0.69 | 0.59 | -0.81 | 4.18E-01 | 0.130 | 0.134 | 0.96 | 0.82 | -1.12 | 0.79 | 1.41E-04 | SYNJ1                                           | intronic       |
| 12 | 67000039  | T | C | rs145636250          | 2.51E-05 | 0.036 | 0.065 | 0.55 | 0.42 | -0.71 | 3.06E-01 | 0.036 | 0.039 | 0.91 | 0.69 | -1.21 | 0.69 | 1.42E-04 | GRIP1                                           | intronic       |
| 6  | 142261391 | G | A | rs6920050            | 1.42E-01 | 0.281 | 0.299 | 0.91 | 0.81 | -1.03 | 5.26E-05 | 0.242 | 0.291 | 0.78 | 0.69 | -0.88 | 0.84 | 1.43E-04 | MIR4465(dist=1256371), NMBR(dist=135354)        | intergenic     |
| 8  | 50826599  | C | G | rs967107             | 3.07E-01 | 0.431 | 0.435 | 1.01 | 0.91 | -1.13 | 1.06E-05 | 0.454 | 0.383 | 0.75 | 0.67 | -0.83 | 0.85 | 1.43E-04 | SNTG1                                           | intronic       |
| 12 | 67000895  | A | G | rs150260273          | 2.53E-05 | 0.036 | 0.065 | 0.55 | 0.42 | -0.71 | 3.06E-01 | 0.036 | 0.039 | 0.91 | 0.69 | -1.21 | 0.69 | 1.43E-04 | GRIP1                                           | intronic       |
| 19 | 50304336  | A | G | rs1003424            | 2.37E-01 | 0.419 | 0.399 | 1.08 | 0.97 | -1.21 | 2.62E-05 | 0.432 | 0.384 | 1.22 | 1.1  | -1.36 | 1.17 | 1.44E-04 | AP2A1                                           | intronic       |
| 7  | 38060438  | A | G | rs7784794            | 4.05E-01 | 0.369 | 0.351 | 1.08 | 0.96 | -1.21 | 2.40E-06 | 0.415 | 0.360 | 1.26 | 1.13 | -1.4  | 1.18 | 1.45E-04 | EPDR1(dist=68896), STARD3NL(dist=157370)        | intergenic     |
| 3  | 118215541 | A | G | rs7620514            | 2.20E-01 | 0.089 | 0.106 | 0.83 | 0.69 | -1    | 3.67E-05 | 0.071 | 0.099 | 0.69 | 0.57 | -0.85 | 0.77 | 1.47E-04 | LINC00901(dist=1564456), IGSF11(dist=403938)    | intergenic     |
| 6  | 33574238  | C | T | rs77459368           | 3.71E-06 | 0.016 | 0.032 | 0.50 | 0.34 | -0.74 | 2.69E-01 | 0.034 | 0.042 | 0.81 | 0.61 | -1.06 | 0.59 | 1.49E-04 | LINC00336(dist=13123), ITPR3(dist=14918)        | intergenic     |
| 8  | 6422996   | G | A | rs56112478           | 1.97E-05 | 0.088 | 0.057 | 1.58 | 1.28 | -1.96 | 2.74E-01 | 0.065 | 0.059 | 1.09 | 0.88 | -1.35 | 1.37 | 1.49E-04 | MCPH1                                           | intronic       |
| 7  | 113507691 | G | A | rs10808174           | 4.80E-01 | 0.479 | 0.477 | 0.99 | 0.89 | -1.11 | 1.80E-06 | 0.517 | 0.451 | 0.77 | 0.69 | -0.85 | 0.85 | 1.50E-04 | LINC00998(dist=749054), PPP1R3A(dist=9191)      | intergenic     |
| 12 | 67009502  | G | A | rs116507348          | 2.72E-05 | 0.036 | 0.064 | 0.54 | 0.42 | -0.71 | 3.08E-01 | 0.036 | 0.039 | 0.91 | 0.69 | -1.21 | 0.69 | 1.50E-04 | GRIP1                                           | intronic       |
| 12 | 67002567  | C | T | rs148183545          | 2.63E-05 | 0.036 | 0.065 | 0.55 | 0.42 | -0.71 | 3.11E-01 | 0.036 | 0.039 | 0.92 | 0.69 | -1.21 | 0.69 | 1.50E-04 | GRIP1                                           | intronic       |
| 17 | 40496037  | A | G | rs17879738           | 2.62E-01 | 0.091 | 0.085 | 1.08 | 0.89 | -1.31 | 6.27E-06 | 0.099 | 0.067 | 1.54 | 1.29 | -1.85 | 1.34 | 1.50E-04 | STAT3                                           | intronic       |
| 8  | 50823808  | T | C | rs2247368            | 2.98E-01 | 0.431 | 0.435 | 1.01 | 0.91 | -1.13 | 1.26E-05 | 0.453 | 0.382 | 0.75 | 0.67 | -0.83 | 0.85 | 1.51E-04 | SNTG1                                           | intronic       |
| 8  | 50834435  | G | A | rs318861             | 2.81E-01 | 0.427 | 0.430 | 1.01 | 0.91 | -1.13 | 1.26E-05 | 0.456 | 0.386 | 0.75 | 0.68 | -0.83 | 0.85 | 1.52E-04 | SNTG1                                           | intronic       |
| 8  | 50815390  | G | T | rs2449962            | 3.03E-01 | 0.438 | 0.441 | 1.01 | 0.91 | -1.13 | 1.19E-05 | 0.460 | 0.391 | 0.75 | 0.68 | -0.84 | 0.85 | 1.53E-04 | C8orf22(dist=826748), SNTG1(dist=6959)          | intergenic     |
| 6  | 142245750 | C | T | rs9389955            | 1.66E-01 | 0.284 | 0.302 | 0.92 | 0.81 | -1.04 | 3.96E-05 | 0.244 | 0.294 | 0.78 | 0.69 | -0.88 | 0.85 | 1.53E-04 | MIR4465(dist=1240730), NMBR(dist=150995)        | intergenic     |
| 21 | 34013779  | A | G | rs28449995           | 5.85E-06 | 0.112 | 0.155 | 0.69 | 0.58 | -0.81 | 4.14E-01 | 0.130 | 0.134 | 0.96 | 0.82 | -1.12 | 0.79 | 1.53E-04 | SYNJ1                                           | intronic       |
| 8  | 50832841  | A | T | rs318858             | 3.72E-01 | 0.437 | 0.443 | 1.03 | 0.92 | -1.14 | 6.67E-06 | 0.463 | 0.390 | 0.74 | 0.67 | -0.82 | 0.85 | 1.53E-04 | SNTG1                                           | intronic       |
| 6  | 142268395 | T | C | rs4486039            | 1.77E-01 | 0.288 | 0.306 | 0.92 | 0.82 | -1.04 | 3.42E-05 | 0.250 | 0.300 | 0.78 | 0.69 | -0.88 | 0.85 | 1.55E-04 | MIR4465(dist=1263375), NMBR(dist=128350)        | intergenic     |
| 7  | 158015457 | T | C | rs6948273            | 3.43E-01 | 0.284 | 0.280 | 0.98 | 0.87 | -1.11 | 6.33E-06 | 0.269 | 0.330 | 1.34 | 1.19 | -1.51 | 1.19 | 1.58E-04 | PTPRN2                                          | intronic       |
| 6  | 142265773 | A | G | rs2152586            | 1.84E-01 | 0.285 | 0.302 | 0.92 | 0.82 | -1.04 | 3.25E-05 | 0.246 | 0.296 | 0.78 | 0.69 | -0.87 | 0.85 | 1.58E-04 | MIR4465(dist=1260753), NMBR(dist=130972)        | intergenic     |
| 11 | 5435298   | A | G | rs7396978            | 1.74E-01 | 0.405 | 0.400 | 0.98 | 0.88 | -1.1  | 6.18E-05 | 0.440 | 0.382 | 0.79 | 0.71 | -0.87 | 0.85 | 1.58E-04 | OR51B5                                          | intronic       |
| 6  | 142264851 | T | A | rs9399390            | 1.83E-01 | 0.285 | 0.302 | 0.92 | 0.82 | -1.04 | 3.30E-05 | 0.246 | 0.296 | 0.78 | 0.69 | -0.87 | 0.85 | 1.59E-04 | MIR4465(dist=1259831), NMBR(dist=131894)        | intergenic     |
| 6  | 142263542 | A | G | rs9373330            | 1.81E-01 | 0.285 | 0.302 | 0.92 | 0.82 | -1.04 | 3.38E-05 | 0.246 | 0.296 | 0.78 | 0.69 | -0.87 | 0.85 | 1.59E-04 | MIR4465(dist=1258522), NMBR(dist=133203)        | intergenic     |
| 6  | 142259390 | A | G | rs9389957            | 1.71E-01 | 0.285 | 0.303 | 0.92 | 0.82 | -1.04 | 3.87E-05 | 0.247 | 0.296 | 0.78 | 0.69 | -0.88 | 0.85 | 1.59E-04 | MIR4465(dist=1254370), NMBR(dist=137355)        | intergenic     |
| 16 | 50371463  | T | G | rs11644259           | 5.05E-05 | 0.309 | 0.369 | 0.76 | 0.68 | -0.86 | 1.41E-01 | 0.324 | 0.333 | 0.96 | 0.86 | -1.07 | 0.85 | 1.60E-04 | BRD7                                            | intronic       |
| 6  | 89994698  | C | G | rs9362632            | 2.07E-06 | 0.200 | 0.249 | 0.75 | 0.66 | -0.86 | 5.16E-01 | 0.218 | 0.228 | 0.94 | 0.83 | -1.07 | 0.82 | 1.62E-04 | GABRR2                                          | intronic       |
| 4  | 77747013  | T | C | rs1845259            | 4.33E-05 | 0.226 | 0.178 | 0.74 | 0.65 | -0.85 | 2.07E-01 | 0.222 | 0.217 | 0.97 | 0.86 | -1.1  | 0.82 | 1.62E-04 | SHROOM3(dist=42608), SOWAHD(dist=69069)         | intergenic     |
| 8  | 38952925  | T | C | rs55985346           | 3.95E-01 | 0.091 | 0.090 | 1.01 | 0.83 | -1.22 | 3.49E-06 | 0.112 | 0.075 | 1.56 | 1.31 | -1.85 | 1.32 | 1.62E-04 | ADAM9                                           | intronic       |
| 12 | 67033773  | C | T | rs116365503          | 3.71E-05 | 0.034 | 0.061 | 0.54 | 0.41 | -0.72 | 2.94E-01 | 0.033 | 0.036 | 0.91 | 0.68 | -1.21 | 0.68 | 1.63E-04 | GRIP1                                           | intronic       |
| 6  | 32519782  | T | A | rs115272081          | 4.38E-05 | 0.091 | 0.113 | 0.78 | 0.65 | -0.94 | 1.14E-01 | 0.113 | 0.130 | 0.85 | 0.72 | -1    | 0.74 | 1.64E-04 | HLA-DRB6                                        | downstream     |
| 11 | 5435475   | G | A | rs10742670           | 2.39E-01 | 0.447 | 0.445 | 0.99 | 0.89 | -1.11 | 2.91E-05 | 0.473 | 0.417 | 0.79 | 0.72 | -0.88 | 0.84 | 1.66E-04 | OR51B5                                          | intronic       |
| 6  | 142262201 | A | T | rs1819569            | 1.84E-01 | 0.285 | 0.302 | 0.92 | 0.82 | -1.04 | 3.57E-05 | 0.246 | 0.296 | 0.78 | 0.69 | -0.87 | 0.85 | 1.67E-04 | MIR4465(dist=1257181), NMBR(dist=134544)        | intergenic     |
| 6  | 32552953  | C | T | rs116743472          | 2.51E-05 | 0.100 | 0.125 | 0.77 | 0.65 | -0.92 | 1.05E-01 | 0.142 | 0.164 | 0.84 | 0.73 | -0.98 | 0.77 | 1.68E-04 | HLA-DRB1                                        | intronic       |
| 13 | 48089493  | A | C | rs9595727            | 9.06E-06 | 0.073 | 0.115 | 0.61 | 0.5  | -0.74 | 3.25E-01 | 0.090 | 0.091 | 0.99 | 0.83 | -1.19 | 0.76 | 1.68E-04 | HTR2A(dist=618282), LINC00562(dist=414795)      | intergenic     |
| 19 | 50301545  | G | A | rs7251463            | 1.75E-01 | 0.404 | 0.384 | 1.09 | 0.97 | -1.22 | 3.91E-05 | 0.408 | 0.368 | 1.18 | 1.06 | -1.31 | 1.18 | 1.69E-04 | AP2A1                                           | intronic       |
| 7  | 38032328  | G | T | rs1376262            | 3.88E-01 | 0.470 | 0.453 | 1.07 | 0.96 | -1.2  | 3.29E-06 | 0.539 | 0.480 | 1.26 | 1.14 | -1.4  | 1.16 | 1.71E-04 | EPDR1(dist=40786), STARD3NL(dist=185480)        | intergenic     |
| 10 | 15456812  | A | G | rs11259648           | 2.90E-01 | 0.112 | 0.101 | 0.89 | 0.75 | -1.06 | 1.45E-05 | 0.123 | 0.093 | 0.73 | 0.62 | -0.86 | 0.77 | 1.71E-04 | FAM171A1(dist=43754), ITGA8(dist=99136)         | intergenic     |
| 8  | 50829796  | G | T | rs2450287            | 4.05E-01 | 0.439 | 0.445 | 1.03 | 0.92 | -1.15 | 6.10E-06 | 0.464 | 0.391 | 0.74 | 0.67 | -0.82 | 0.85 | 1.72E-04 | SNTG1                                           | intronic       |
| 7  | 9291537   | A | G | rs1852883            | 5.65E-05 | 0.236 | 0.200 | 0.81 | 0.71 | -0.93 | 2.66E-01 | 0.186 | 0.172 | 0.91 | 0.8  | -1.04 | 0.81 | 1.72E-04 | NXPH1(dist=498944), PER4(dist=382363)           | intergenic     |
| 6  | 31523684  | C | A | rs550585935          | 7.56E-01 | 0.396 | 0.400 | 0.98 | 0.88 | -1.1  | 4.02E-07 | 0.439 | 0.376 | 1.30 | 1.17 | -1.44 | 1.19 | 1.72E-04 | NFKB1L1                                         | intronic       |
| 8  | 50811939  | C | G | rs451437             | 2.79E-01 | 0.434 | 0.437 | 1.01 | 0.91 | -1.13 | 1.84E-05 | 0.454 | 0.385 | 0.75 | 0.68 | -0.84 | 0.85 | 1.74E-04 | C8orf22(dist=823297), SNTG1(dist=10410)         | intergenic     |
| 6  | 32652392  | A | T | rs17212413           | 8.01E-06 | 0.068 | 0.047 | 1.49 | 1.17 | -1.88 | 4.12E-01 | 0.044 | 0.038 | 1.15 | 0.89 | -1.49 | 1.56 | 1.74E-04 | HLA-DQB1(dist=17926), HLA-DQA2(dist=56771)      | intergenic     |
| 3  | 118206467 | C | T | rs7631113            | 2.32E-01 | 0.089 | 0.105 | 0.83 | 0.69 | -1    | 4.05E-05 | 0.071 | 0.099 | 0.70 | 0.57 | -0.85 | 0.78 | 1.77E-04 | LINC00901(dist=1555382), IGSF11(dist=413012)    | intergenic     |
| 17 | 40488661  | C | A | rs17879198           | 2.48E-01 | 0.072 | 0.066 | 1.10 | 0.89 | -1.37 | 9.88E-06 | 0.080 | 0.051 | 1.61 | 1.31 | -1.97 | 1.37 | 1.78E-04 | STAT3                                           | intronic       |
| 1  | 1042483   | C | T | rs12733365           | 2.70E-01 | 0.460 | 0.460 | 1.00 | 0.9  | -1.12 | 2.10E-05 | 0.483 | 0.414 | 1.32 | 1.19 | -1.47 | 1.17 | 1.78E-04 | C1orf159                                        | intronic       |
| 8  | 105388823 | G | A | rs75948267           | 4.99E-05 | 0.056 | 0.037 | 1.53 | 1.18 | -1.99 | 1.28E-01 | 0.056 | 0.045 | 1.25 | 0.99 | -1.57 | 1.45 | 1.79E-04 | DCSTAMP(dist=19906), DPYS(dist=2829)            | intergenic     |
| 12 | 9855234   | G | T | rs12307886           | 3.05E-01 | 0.089 | 0.086 | 1.04 | 0.86 | -1.27 | 2.11E-05 | 0.113 | 0.079 | 1.50 | 1.26 | -1.78 | 1.31 | 1.82E-04 | MIR4303(dist=166008), SLC9A7P1(dist=292385)     | intergenic     |
| 5  | 117739303 | C | T | rs58895319           | 2.74E-01 | 0.092 | 0.088 | 1.05 | 0.86 | -1.26 | 1.58E-05 | 0.106 | 0.074 | 1.49 | 1.25 | -1.77 | 1.35 | 1.82E-04 | LOC101927280                                    | ncRNA_intronic |
| 8  | 6423963   | C | T | rs7833871            | 2.42E-05 | 0.089 | 0.059 | 1.57 | 1.27 | -1.93 | 2.85E-01 | 0.065 | 0.060 | 1.09 | 0.88 | -1.35 | 1.36 | 1.83E-04 | MCPH1                                           | intronic       |
| 8  | 6423978   | A | G | rs7817104            | 2.42E-05 | 0.089 | 0.059 | 1.56 | 1.27 | -1.93 | 2.85E-01 | 0.065 | 0.060 | 1.09 | 0.88 | -1.35 | 1.36 | 1.83E-04 | MCPH1                                           | intronic       |
| 6  | 32552590  | G | C | rs112530924          | 7.33E-06 | 0.118 | 0.149 | 0.77 | 0.65 | -0.9  | 3.47E-01 | 0.119 | 0.127 | 0.92 | 0.79 | -1.08 | 0.76 | 1.84E-04 | HLA-DRB1                                        | intronic       |
| 2  | 60137193  | C | T | rs2194701;rs75398865 | 5.53E-01 | 0.403 | 0.387 | 1.07 | 0.96 | -1.2  | 1.53E-06 | 0.460 | 0.404 | 1.26 | 1.13 | -1.4  | 1.17 | 1.84E-04 | LOC101927285(dist=630658), MIR4432(dist=477304) | intergenic     |
| 6  | 33573994  | G | A | rs76108243           | 8.19E-06 | 0.012 | 0.026 | 0.47 | 0.3  | -0.73 | 2.07E-01 | 0.029 | 0.038 | 0.76 | 0.56 | -1.03 | 0.58 | 1.84E-04 | LINC00336(dist=12879), ITPR3(dist=15162)        | intergenic     |
| 17 | 40494457  | C | T | rs17879513           | 2.40E-01 | 0.073 | 0.066 | 1.11 | 0.   |       |          |       |       |      |      |       |      |          |                                                 |                |

|    |           |   |   |                                    |          |       |       |        |      |       |          |       |       |      |      |       |      |          |                                            |                |
|----|-----------|---|---|------------------------------------|----------|-------|-------|--------|------|-------|----------|-------|-------|------|------|-------|------|----------|--------------------------------------------|----------------|
| 17 | 33273163  | T | C | rs114899415                        | 4.34E-07 | 0.053 | 0.090 | 0.57   | 0.45 | -0.71 | 8.99E-01 | 0.061 | 0.060 | 1.02 | 0.82 | -1.27 | 0.73 | 1.91E-04 | CCT6B                                      | intronic       |
| 1  | 152157887 | A | G | rs6696576                          | 1.73E-01 | 0.123 | 0.108 | 0.87   | 0.73 | -1.03 | 6.19E-05 | 0.137 | 0.107 | 0.76 | 0.65 | -0.89 | 0.78 | 1.91E-04 | RPTN(dist=26183), HRNR(dist=26665)         | intergenic     |
| 8  | 50833052  | T | A | rs318859                           | 2.48E-01 | 0.479 | 0.484 | 1.02   | 0.91 | -1.13 | 2.98E-05 | 0.494 | 0.422 | 0.75 | 0.67 | -0.83 | 0.86 | 1.92E-04 | SNTG1                                      | intronic       |
| 6  | 31515340  | T | A | rs2071592                          | 2.10E-01 | 0.503 | 0.497 | 1.02   | 0.92 | -1.14 | 3.99E-05 | 0.535 | 0.472 | 1.29 | 1.16 | -1.43 | 1.16 | 1.94E-04 | NFKB1L1                                    | intronic       |
| 6  | 33574199  | G | A | rs112668322                        | 9.10E-06 | 0.013 | 0.026 | 0.48   | 0.31 | -0.74 | 2.06E-01 | 0.030 | 0.039 | 0.76 | 0.57 | -1.03 | 0.58 | 1.94E-04 | LINC00336(dist=13084), ITPR3(dist=14957)   | intergenic     |
| 13 | 48085819  | C | T | rs74073877                         | 9.93E-06 | 0.073 | 0.115 | 0.61   | 0.5  | -0.74 | 3.46E-01 | 0.090 | 0.091 | 0.99 | 0.83 | -1.19 | 0.77 | 1.95E-04 | HTR2A(dist=614608), LINC00562(dist=418469) | intergenic     |
| 13 | 109501687 | T | C | rs9587709                          | 3.43E-05 | 0.391 | 0.339 | 0.80   | 0.71 | -0.9  | 3.95E-01 | 0.359 | 0.351 | 0.96 | 0.86 | -1.07 | 0.83 | 1.95E-04 | MYO16                                      | intronic       |
| 7  | 37702804  | G | A | rs144964446                        | 1.76E-01 | 0.141 | 0.134 | 1.07   | 0.91 | -1.25 | 3.40E-05 | 0.150 | 0.111 | 1.41 | 1.21 | -1.63 | 1.26 | 1.95E-04 | ELMO1(dist=213875), GPR141(dist=77192)     | intergenic     |
| 8  | 50831539  | G | A | rs2450286                          | 2.52E-01 | 0.480 | 0.484 | 1.02   | 0.91 | -1.13 | 2.96E-05 | 0.494 | 0.422 | 0.75 | 0.67 | -0.83 | 0.86 | 1.97E-04 | SNTG1                                      | intronic       |
| 12 | 67022295  | C | T | rs146651389                        | 4.87E-05 | 0.036 | 0.063 | 0.56   | 0.43 | -0.73 | 2.83E-01 | 0.036 | 0.039 | 0.91 | 0.69 | -1.2  | 0.69 | 1.99E-04 | GRIP1                                      | intronic       |
| 8  | 50828008  | C | A | rs2450290                          | 4.51E-01 | 0.440 | 0.448 | 1.03   | 0.92 | -1.15 | 5.60E-06 | 0.465 | 0.392 | 0.74 | 0.67 | -0.82 | 0.85 | 2.02E-04 | SNTG1                                      | intronic       |
| 2  | 103051558 | T | C | rs4851582                          | 2.00E-01 | 0.151 | 0.159 | 0.94   | 0.81 | -1.1  | 4.37E-05 | 0.135 | 0.178 | 0.72 | 0.62 | -0.84 | 0.81 | 2.03E-04 | IL18RAP                                    | intronic       |
| 6  | 32492854  | C | A | rs112815145                        | 3.09E-05 | 0.057 | 0.074 | 0.75   | 0.6  | -0.94 | 9.74E-02 | 0.087 | 0.104 | 0.82 | 0.69 | -0.99 | 0.70 | 2.04E-04 | HLA-DRB5                                   | intronic       |
| 19 | 20397555  | A | C | rs11085307                         | 3.19E-01 | 0.284 | 0.279 | 1.02   | 0.91 | -1.16 | 2.16E-05 | 0.304 | 0.253 | 1.29 | 1.15 | -1.44 | 1.19 | 2.05E-04 | ZNF486(dist=86256), MIR1270(dist=112526)   | intergenic     |
| 3  | 138130484 | T | C | rs7626349                          | 2.33E-05 | 0.476 | 0.425 | 0.81   | 0.73 | -0.91 | 3.48E-01 | 0.435 | 0.420 | 0.94 | 0.85 | -1.04 | 0.86 | 2.08E-04 | MIRAS(dist=6107), ESYT3(dist=22931)        | intergenic     |
| 2  | 18491824  | A | G | rs10205060                         | 1.49E-01 | 0.202 | 0.192 | 1.06   | 0.92 | -1.22 | 3.98E-05 | 0.200 | 0.157 | 1.34 | 1.18 | -1.54 | 1.23 | 2.10E-04 | KCNS3(dist=377599), RDH14(dist=244165)     | intergenic     |
| 13 | 48124163  | T | G | rs6561391                          | 2.76E-05 | 0.086 | 0.129 | 0.64   | 0.53 | -0.77 | 2.82E-01 | 0.096 | 0.097 | 0.99 | 0.83 | -1.18 | 0.77 | 2.13E-04 | HTR2A(dist=652952), LINC00562(dist=380125) | intergenic     |
| 5  | 117755812 | G | A | rs78814990                         | 3.08E-01 | 0.073 | 0.069 | 1.05   | 0.85 | -1.3  | 1.42E-05 | 0.087 | 0.057 | 1.58 | 1.3  | -1.91 | 1.36 | 2.13E-04 | LOC101927280                               | ncRNA_intronic |
| 11 | 125614967 | C | T | rs493654                           | 2.23E-01 | 0.109 | 0.096 | 0.87   | 0.73 | -1.05 | 6.00E-05 | 0.129 | 0.100 | 0.76 | 0.64 | -0.89 | 0.78 | 2.14E-04 | ACRV1(dist=64174), PATE1(dist=1221)        | intergenic     |
| 1  | 231979880 | G | C | rs72760430                         | 2.16E-01 | 0.080 | 0.087 | 0.90   | 0.74 | -1.1  | 4.03E-05 | 0.064 | 0.093 | 0.66 | 0.54 | -0.81 | 0.76 | 2.15E-04 | TSNAX-DISC1                                | ncRNA_intronic |
| 2  | 236506403 | T | G | rs35898683                         | 1.47E-06 | 0.276 | 0.238 | 1.22   | 1.08 | -1.38 | 8.04E-01 | 0.212 | 0.202 | 1.06 | 0.93 | -1.2  | 1.24 | 2.15E-04 | AGAP1                                      | intronic       |
| 5  | 117757644 | G | A | rs114818095                        | 3.07E-01 | 0.072 | 0.069 | 1.05   | 0.85 | -1.31 | 1.48E-05 | 0.087 | 0.057 | 1.58 | 1.3  | -1.91 | 1.36 | 2.16E-04 | LOC101927280                               | ncRNA_intronic |
| 17 | 78329417  | G | A | rs78230659                         | 2.68E-01 | 0.225 | 0.212 | 0.93   | 0.81 | -1.06 | 1.37E-05 | 0.283 | 0.250 | 0.84 | 0.75 | -0.95 | 0.81 | 2.19E-04 | LOC100294362                               | ncRNA_intronic |
| 21 | 34030757  | G | A | rs845005                           | 1.23E-05 | 0.124 | 0.168 | 0.70   | 0.6  | -0.82 | 4.09E-01 | 0.136 | 0.140 | 0.96 | 0.83 | -1.12 | 0.80 | 2.20E-04 | SYNJ1                                      | intronic       |
| 8  | 50817915  | C | T | rs318854                           | 3.23E-01 | 0.438 | 0.442 | 1.02   | 0.91 | -1.13 | 1.77E-05 | 0.460 | 0.391 | 0.75 | 0.68 | -0.84 | 0.85 | 2.20E-04 | C8orf22(dist=829273), SNTG1(dist=4434)     | intergenic     |
| 6  | 32552954  | A | G | rs114217086                        | 3.40E-05 | 0.100 | 0.124 | 0.78   | 0.65 | -0.93 | 1.12E-01 | 0.142 | 0.163 | 0.85 | 0.73 | -0.98 | 0.78 | 2.21E-04 | HLA-DRB1                                   | intronic       |
| 6  | 31562764  | C | T | rs3130632                          | 4.62E-01 | 0.434 | 0.437 | 0.99   | 0.89 | -1.11 | 4.97E-06 | 0.466 | 0.395 | 1.34 | 1.21 | -1.49 | 1.16 | 2.21E-04 | NCR3(dist=2002), AIF1(dist=20230)          | intergenic     |
| 18 | 64975822  | C | A | rs72632203                         | 7.63E-06 | 0.266 | 0.325 | 0.75   | 0.67 | -0.85 | 4.18E-01 | 0.298 | 0.306 | 0.97 | 0.86 | -1.08 | 0.85 | 2.23E-04 | MIR5011(dist=226899), DSEL(dist=197997)    | intergenic     |
| 21 | 34111588  | G | A | rs12626242                         | 4.34E-06 | 0.114 | 0.157 | 0.69   | 0.59 | -0.81 | 5.25E-01 | 0.133 | 0.136 | 0.98 | 0.84 | -1.14 | 0.80 | 2.26E-04 | PAXBP1-AS1                                 | ncRNA_intronic |
| 21 | 34045065  | C | T | rs845025                           | 5.49E-06 | 0.113 | 0.156 | 0.69   | 0.58 | -0.81 | 4.96E-01 | 0.134 | 0.137 | 0.97 | 0.84 | -1.13 | 0.80 | 2.27E-04 | SYNJ1                                      | intronic       |
| 8  | 6422931   | G | A | rs56076232                         | 2.55E-05 | 0.085 | 0.057 | 1.54   | 1.25 | -1.91 | 2.88E-01 | 0.065 | 0.060 | 1.09 | 0.88 | -1.35 | 1.37 | 2.29E-04 | MCPH1                                      | intronic       |
| 5  | 176153983 | A | C | rs114100222                        | 3.15E-05 | 0.069 | 0.045 | 1.56   | 1.23 | -1.98 | 3.46E-01 | 0.048 | 0.043 | 1.12 | 0.87 | -1.43 | 1.45 | 2.30E-04 | TSPAN17(dist=67926), LINC01574(dist=16221) | intergenic     |
| 7  | 38039137  | T | C | rs6953285                          | 3.11E-01 | 0.447 | 0.430 | 1.07   | 0.96 | -1.2  | 1.41E-05 | 0.487 | 0.430 | 1.26 | 1.13 | -1.4  | 1.16 | 2.31E-04 | EPDR1(dist=47595), STARD3NL(dist=178671)   | intergenic     |
| 7  | 79025250  | C | T | rs76530656                         | 4.45E-01 | 0.037 | 0.033 | 1.11   | 0.83 | -1.49 | 3.22E-06 | 0.053 | 0.032 | 1.69 | 1.31 | -2.16 | 1.56 | 2.32E-04 | MAGI2                                      | intronic       |
| 6  | 31736570  | G | A | rs707933                           | 3.03E-01 | 0.100 | 0.095 | 1.06   | 0.88 | -1.28 | 1.76E-05 | 0.122 | 0.083 | 1.54 | 1.3  | -1.82 | 1.29 | 2.32E-04 | VWA7                                       | intronic       |
| 1  | 201915960 | A | C | rs2819372                          | 2.20E-05 | 0.179 | 0.212 | 0.81   | 0.7  | -0.93 | 1.89E-01 | 0.191 | 0.212 | 0.88 | 0.77 | -1    | 0.82 | 2.33E-04 | LMOD1                                      | upstream       |
| 7  | 38045232  | A | T | rs62444561                         | 2.94E-01 | 0.442 | 0.425 | 1.07   | 0.96 | -1.2  | 1.79E-05 | 0.483 | 0.426 | 1.26 | 1.13 | -1.4  | 1.16 | 2.35E-04 | EPDR1(dist=53690), STARD3NL(dist=172576)   | intergenic     |
| 7  | 38046029  | A | T | rs9639782                          | 2.95E-01 | 0.442 | 0.425 | 1.07   | 0.96 | -1.2  | 1.79E-05 | 0.483 | 0.426 | 1.26 | 1.13 | -1.4  | 1.16 | 2.37E-04 | EPDR1(dist=54487), STARD3NL(dist=171779)   | intergenic     |
| 2  | 103006387 | A | G | rs4851570                          | 3.07E-01 | 0.148 | 0.152 | 0.97   | 0.83 | -1.13 | 2.02E-05 | 0.130 | 0.176 | 0.70 | 0.6  | -0.81 | 0.81 | 2.39E-04 | IL18R1                                     | intronic       |
| 21 | 34016678  | A | C | rs844976                           | 1.27E-05 | 0.124 | 0.167 | 0.70   | 0.6  | -0.82 | 4.28E-01 | 0.135 | 0.139 | 0.97 | 0.83 | -1.13 | 0.80 | 2.39E-04 | SYNJ1                                      | intronic       |
| 13 | 48076943  | C | T | rs7331318                          | 1.07E-05 | 0.073 | 0.116 | 0.61   | 0.5  | -0.74 | 3.84E-01 | 0.090 | 0.091 | 1.00 | 0.83 | -1.2  | 0.77 | 2.40E-04 | HTR2A(dist=605732), LINC00562(dist=427345) | intergenic     |
| 19 | 20397253  | C | T | rs74183971                         | 3.46E-01 | 0.284 | 0.280 | 1.02   | 0.9  | -1.15 | 2.23E-05 | 0.304 | 0.254 | 1.29 | 1.15 | -1.44 | 1.19 | 2.40E-04 | ZNF486(dist=85954), MIR1270(dist=112828)   | intergenic     |
| 7  | 38043899  | C | T | rs10951544                         | 2.92E-01 | 0.442 | 0.425 | 1.07   | 0.96 | -1.2  | 1.93E-05 | 0.482 | 0.426 | 1.26 | 1.13 | -1.39 | 1.16 | 2.43E-04 | EPDR1(dist=52357), STARD3NL(dist=173909)   | intergenic     |
| 2  | 18452130  | T | A | rs10211036                         | 2.43E-01 | 0.112 | 0.104 | 1.09   | 0.92 | -1.3  | 2.51E-05 | 0.130 | 0.094 | 1.43 | 1.22 | -1.68 | 1.27 | 2.44E-04 | MIR5011(dist=226899), RDH14(dist=283859)   | intergenic     |
| 5  | 117758301 | A | G | rs151084222                        | 3.02E-01 | 0.071 | 0.068 | 1.05   | 0.85 | -1.31 | 1.96E-05 | 0.085 | 0.056 | 1.58 | 1.29 | -1.92 | 1.36 | 2.46E-04 | LOC101927280                               | ncRNA_intronic |
| 21 | 34023423  | C | G | rs1720126                          | 1.28E-05 | 0.124 | 0.167 | 0.70   | 0.6  | -0.82 | 4.32E-01 | 0.135 | 0.139 | 0.97 | 0.83 | -1.13 | 0.80 | 2.46E-04 | SYNJ1                                      | intronic       |
| 13 | 47718645  | A | G | rs9534557                          | 2.70E-01 | 0.309 | 0.306 | 0.99   | 0.88 | -1.11 | 3.93E-05 | 0.374 | 0.320 | 0.79 | 0.71 | -0.88 | 0.85 | 2.46E-04 | HTR2A(dist=247434), LINC00562(dist=785643) | intergenic     |
| 13 | 48070850  | G | T | rs74073872                         | 1.23E-05 | 0.073 | 0.115 | 0.61   | 0.5  | -0.74 | 3.77E-01 | 0.090 | 0.091 | 1.00 | 0.83 | -1.2  | 0.77 | 2.50E-04 | HTR2A(dist=599639), LINC00562(dist=433438) | intergenic     |
| 6  | 32191822  | G | A | rs8192564                          | 5.17E-05 | 0.103 | 0.075 | 1.43   | 1.18 | -1.73 | 2.01E-01 | 0.087 | 0.077 | 1.14 | 0.94 | -1.37 | 1.31 | 2.50E-04 | NOTCH4(NM_004557:c.-117C>T)                | UTR5           |
| 12 | 66965158  | T | G | rs146238078                        | 4.92E-05 | 0.034 | 0.060 | 0.55   | 0.42 | -0.72 | 3.28E-01 | 0.036 | 0.039 | 0.93 | 0.7  | -1.22 | 0.69 | 2.57E-04 | GRIP1                                      | intronic       |
| 21 | 34096806  | A | G | rs859789                           | 6.25E-06 | 0.111 | 0.154 | 0.69   | 0.59 | -0.81 | 4.98E-01 | 0.134 | 0.137 | 0.97 | 0.84 | -1.13 | 0.80 | 2.57E-04 | SYNJ1                                      | intronic       |
| 2  | 18469370  | C | G | rs10201532                         | 2.46E-01 | 0.110 | 0.103 | 1.07   | 0.9  | -1.28 | 2.41E-05 | 0.128 | 0.092 | 1.45 | 1.23 | -1.7  | 1.28 | 2.57E-04 | KCNS3(dist=355145), RDH14(dist=266619)     | intergenic     |
| 2  | 103007567 | C | T | rs17027060                         | 3.15E-01 | 0.148 | 0.152 | 0.97   | 0.83 | -1.13 | 2.14E-05 | 0.130 | 0.176 | 0.70 | 0.6  | -0.82 | 0.82 | 2.58E-04 | IL18R1                                     | intronic       |
| 19 | 50308134  | G | C | rs2241040                          | 2.71E-01 | 0.421 | 0.403 | 1.08   | 0.96 | -1.2  | 4.84E-05 | 0.433 | 0.386 | 1.21 | 1.09 | -1.35 | 1.16 | 2.60E-04 | AP2A1                                      | intronic       |
| 12 | 16157299  | C | T | rs74063612;rs375830231;rs386760702 | 2.88E-01 | 0.129 | 0.126 | 1.02   | 0.87 | -1.21 | 3.94E-05 | 0.139 | 0.107 | 1.35 | 1.16 | -1.57 | 1.33 | 2.61E-04 | DERA                                       | intronic       |
| 17 | 73797775  | C | A | rs11652539                         | 3.24E-01 | 0.137 | 0.109 | 1.29   | 1.09 | -1.52 | 2.94E-05 | 0.187 | 0.169 | 1.13 | 0.99 | -1.29 | 1.25 | 2.62E-04 | UNK                                        | intronic       |
| 2  | 103029165 | A | T | rs11693955                         | 2.97E-01 | 0.148 | 0.152 | 0.97   | 0.83 | -1.13 | 2.57E-05 | 0.128 | 0.174 | 0.70 | 0.6  | -0.81 | 0.82 | 2.63E-04 | IL18R1(dist=13930), IL18RAP(dist=6085)     | intergenic     |
| 5  | 117742409 | C | T | rs116003810                        | 4.12E-01 | 0.065 | 0.063 | 1.04</ |      |       |          |       |       |      |      |       |      |          |                                            |                |

|    |           |   |   |                      |          |       |       |      |      |       |          |       |       |      |      |       |      |          |                                              |                |
|----|-----------|---|---|----------------------|----------|-------|-------|------|------|-------|----------|-------|-------|------|------|-------|------|----------|----------------------------------------------|----------------|
| 6  | 31605278  | C | T | rs1046756            | 2.48E-01 | 0.132 | 0.125 | 1.07 | 0.91 | -1.26 | 4.85E-05 | 0.160 | 0.117 | 1.44 | 1.24 | -1.67 | 1.25 | 2.75E-04 | PRRC2A                                       | exonic         |
| 8  | 50842474  | T | C | rs2628420            | 3.84E-01 | 0.408 | 0.412 | 0.98 | 0.88 | -1.1  | 1.38E-05 | 0.433 | 0.366 | 1.32 | 1.19 | -1.47 | 1.17 | 2.79E-04 | SNTG1                                        | intronic       |
| 5  | 176135270 | G | A | rs4602645            | 3.71E-05 | 0.095 | 0.065 | 1.50 | 1.23 | -1.84 | 3.74E-01 | 0.084 | 0.080 | 1.05 | 0.87 | -1.27 | 1.34 | 2.80E-04 | TSPAN17(dist=49211), LINC01574(dist=34936)   | intergenic     |
| 1  | 1053670   | G | A | rs4970410            | 3.23E-01 | 0.456 | 0.458 | 0.99 | 0.89 | -1.11 | 2.30E-05 | 0.466 | 0.399 | 1.31 | 1.18 | -1.46 | 1.16 | 2.85E-04 | C1orf159(dist=1934), LINC01342(dist=18727)   | intergenic     |
| 17 | 40478842  | A | C | rs1142206339         | 2.66E-01 | 0.069 | 0.063 | 1.10 | 0.88 | -1.37 | 2.11E-05 | 0.078 | 0.051 | 1.58 | 1.28 | -1.93 | 1.37 | 2.89E-04 | STAT3                                        | intronic       |
| 1  | 1054076   | C | T | rs11105065           | 3.01E-01 | 0.452 | 0.454 | 0.99 | 0.89 | -1.11 | 2.81E-05 | 0.462 | 0.396 | 1.31 | 1.18 | -1.45 | 1.17 | 2.90E-04 | C1orf159(dist=2340), LINC01342(dist=18321)   | intergenic     |
| 7  | 38059421  | G | A | rs62444582           | 3.08E-01 | 0.446 | 0.430 | 1.07 | 0.96 | -1.19 | 2.09E-05 | 0.485 | 0.429 | 1.25 | 1.13 | -1.39 | 1.16 | 2.90E-04 | EPDR1(dist=67879), STARD3NL(dist=158387)     | intergenic     |
| 5  | 176135441 | C | T | rs4277931;rs34894674 | 4.00E-05 | 0.095 | 0.066 | 1.49 | 1.22 | -1.83 | 3.74E-01 | 0.084 | 0.080 | 1.05 | 0.87 | -1.27 | 1.34 | 2.92E-04 | TSPAN17(dist=49382), LINC01574(dist=34765)   | intergenic     |
| 5  | 176135442 | T | C | rs34894674;rs4352618 | 4.01E-05 | 0.095 | 0.066 | 1.49 | 1.22 | -1.83 | 3.74E-01 | 0.084 | 0.080 | 1.05 | 0.87 | -1.27 | 1.34 | 2.93E-04 | TSPAN17(dist=49383), LINC01574(dist=34764)   | intergenic     |
| 2  | 103024738 | T | A | rs4851006            | 3.04E-01 | 0.148 | 0.152 | 0.97 | 0.83 | -1.13 | 2.86E-05 | 0.128 | 0.174 | 0.70 | 0.6  | -0.82 | 0.82 | 2.93E-04 | IL18R1(dist=9503), IL18RAP(dist=10512)       | intergenic     |
| 2  | 103024331 | G | A | rs55883125           | 3.03E-01 | 0.148 | 0.152 | 0.97 | 0.83 | -1.13 | 2.88E-05 | 0.128 | 0.174 | 0.70 | 0.6  | -0.82 | 0.82 | 2.94E-04 | IL18R1(dist=9096), IL18RAP(dist=10919)       | intergenic     |
| 2  | 103018077 | C | G | rs3732123            | 3.03E-01 | 0.148 | 0.152 | 0.97 | 0.83 | -1.13 | 2.90E-05 | 0.128 | 0.173 | 0.70 | 0.6  | -0.82 | 0.82 | 2.94E-04 | IL18R1(dist=2842), IL18RAP(dist=17173)       | intergenic     |
| 2  | 18459548  | C | G | rs9808223            | 1.97E-01 | 0.116 | 0.107 | 1.10 | 0.92 | -1.3  | 5.74E-05 | 0.132 | 0.098 | 1.41 | 1.2  | -1.65 | 1.27 | 2.95E-04 | KCNS3(dist=345323), RDH14(dist=276441)       | intergenic     |
| 17 | 40513631  | C | T | rs75059447           | 3.06E-01 | 0.075 | 0.069 | 1.08 | 0.88 | -1.34 | 1.53E-05 | 0.080 | 0.052 | 1.60 | 1.31 | -1.96 | 1.35 | 2.95E-04 | STAT3                                        | intronic       |
| 5  | 176135490 | G | A | rs4632815            | 4.11E-05 | 0.095 | 0.066 | 1.49 | 1.22 | -1.83 | 3.74E-01 | 0.084 | 0.080 | 1.05 | 0.87 | -1.27 | 1.34 | 2.96E-04 | TSPAN17(dist=49431), LINC01574(dist=34716)   | intergenic     |
| 7  | 38028548  | C | T | rs10234987           | 3.32E-01 | 0.445 | 0.429 | 1.07 | 0.96 | -1.19 | 1.73E-05 | 0.484 | 0.428 | 1.25 | 1.13 | -1.39 | 1.16 | 2.98E-04 | EPDR1(dist=37006), STARD3NL(dist=189260)     | intergenic     |
| 13 | 48067790  | G | A | rs111454897          | 1.80E-05 | 0.073 | 0.114 | 0.61 | 0.5  | -0.74 | 3.72E-01 | 0.090 | 0.091 | 1.00 | 0.83 | -1.2  | 0.77 | 3.02E-04 | HTR2A(dist=596579), LINC00562(dist=436498)   | intergenic     |
| 6  | 31628113  | A | C | rs805263             | 2.67E-01 | 0.132 | 0.125 | 1.07 | 0.91 | -1.25 | 4.68E-05 | 0.160 | 0.117 | 1.44 | 1.24 | -1.67 | 1.24 | 3.02E-04 | C6orf47(NM_021184:c.-389T>G)                 | UTR5           |
| 1  | 159936733 | T | G | rs1934073            | 3.91E-01 | 0.130 | 0.108 | 1.23 | 1.04 | -1.46 | 2.02E-05 | 0.155 | 0.141 | 1.12 | 0.97 | -1.29 | 1.35 | 3.04E-04 | LINC01133                                    | ncRNA_intronic |
| 5  | 117748902 | C | G | rs7714378            | 3.31E-01 | 0.071 | 0.068 | 1.05 | 0.85 | -1.3  | 2.17E-05 | 0.085 | 0.056 | 1.57 | 1.29 | -1.91 | 1.35 | 3.04E-04 | LOC101927280                                 | ncRNA_intronic |
| 9  | 122547002 | A | T | rs2781106            | 6.36E-05 | 0.316 | 0.278 | 0.84 | 0.74 | -0.94 | 2.34E-01 | 0.281 | 0.255 | 0.88 | 0.78 | -0.98 | 0.84 | 3.06E-04 | BRINP1(dist=415263), MIR147A(dist=460255)    | intergenic     |
| 21 | 34006917  | T | G | rs844985             | 1.63E-05 | 0.117 | 0.158 | 0.71 | 0.6  | -0.83 | 4.31E-01 | 0.133 | 0.137 | 0.97 | 0.83 | -1.13 | 0.80 | 3.07E-04 | SYNJ1                                        | intronic       |
| 5  | 75934732  | A | G | rs114790677          | 4.88E-05 | 0.039 | 0.065 | 0.58 | 0.45 | -0.75 | 4.15E-01 | 0.042 | 0.043 | 0.97 | 0.75 | -1.26 | 0.70 | 3.07E-04 | IQGAP2                                       | intronic       |
| 5  | 75936590  | A | G | rs75188974           | 5.55E-05 | 0.038 | 0.063 | 0.58 | 0.44 | -0.75 | 3.86E-01 | 0.041 | 0.042 | 0.96 | 0.74 | -1.25 | 0.70 | 3.07E-04 | IQGAP2                                       | intronic       |
| 21 | 34000493  | T | C | rs845023             | 1.67E-05 | 0.131 | 0.173 | 0.72 | 0.62 | -0.84 | 4.25E-01 | 0.138 | 0.141 | 0.97 | 0.84 | -1.13 | 0.81 | 3.08E-04 | SYNJ1                                        | downstream     |
| 6  | 14751273  | G | A | rs56075841           | 4.10E-05 | 0.098 | 0.074 | 1.36 | 1.12 | -1.65 | 3.23E-01 | 0.082 | 0.072 | 1.16 | 0.96 | -1.41 | 1.33 | 3.10E-04 | LINC01108(dist=465588), JARID2(dist=494933)  | intergenic     |
| 13 | 48069603  | C | T | rs59746857           | 4.30E-05 | 0.085 | 0.124 | 0.65 | 0.54 | -0.79 | 2.70E-01 | 0.103 | 0.103 | 0.99 | 0.84 | -1.18 | 0.78 | 3.11E-04 | HTR2A(dist=598392), LINC00562(dist=434685)   | intergenic     |
| 13 | 48065294  | T | A | rs9595725            | 1.92E-05 | 0.073 | 0.114 | 0.61 | 0.5  | -0.74 | 3.71E-01 | 0.090 | 0.091 | 1.00 | 0.83 | -1.2  | 0.77 | 3.15E-04 | HTR2A(dist=594083), LINC00562(dist=438994)   | intergenic     |
| 17 | 74826031  | G | A | rs78559224           | 5.42E-05 | 0.096 | 0.134 | 0.69 | 0.57 | -0.82 | 4.74E-01 | 0.096 | 0.097 | 1.00 | 0.84 | -1.19 | 0.76 | 3.16E-04 | LOC101928514(dist=22847), MGAT5B(dist=38767) | intergenic     |
| 7  | 38050493  | C | T | rs62444562           | 3.17E-01 | 0.450 | 0.434 | 1.07 | 0.96 | -1.19 | 2.32E-05 | 0.488 | 0.432 | 1.25 | 1.13 | -1.39 | 1.16 | 3.16E-04 | EPDR1(dist=58951), STARD3NL(dist=167315)     | intergenic     |
| 2  | 103047802 | C | T | rs66566526           | 3.16E-01 | 0.149 | 0.153 | 0.97 | 0.83 | -1.13 | 3.02E-05 | 0.129 | 0.174 | 0.70 | 0.61 | -0.82 | 0.82 | 3.21E-04 | IL18RAP                                      | intronic       |
| 2  | 103014302 | T | G | rs1135354            | 3.27E-01 | 0.148 | 0.152 | 0.97 | 0.83 | -1.13 | 2.78E-05 | 0.128 | 0.174 | 0.70 | 0.6  | -0.82 | 0.82 | 3.23E-04 | IL18R1                                       | UTR3           |
| 15 | 87389585  | T | G | rs8040377            | 3.86E-05 | 0.462 | 0.514 | 1.23 | 1.1  | -1.37 | 3.44E-01 | 0.475 | 0.493 | 1.07 | 0.97 | -1.19 | 1.15 | 3.26E-04 | AGBL1                                        | intronic       |
| 1  | 1044424   | T | C | rs57107904           | 3.11E-01 | 0.412 | 0.411 | 1.00 | 0.9  | -1.12 | 2.85E-05 | 0.423 | 0.363 | 1.29 | 1.16 | -1.43 | 1.18 | 3.26E-04 | C1orf159                                     | intronic       |
| 2  | 103015918 | C | T | rs17027087           | 3.29E-01 | 0.148 | 0.152 | 0.97 | 0.83 | -1.13 | 2.75E-05 | 0.128 | 0.174 | 0.70 | 0.6  | -0.82 | 0.82 | 3.27E-04 | IL18R1                                       | downstream     |
| 7  | 38057364  | G | T | rs9691201            | 3.03E-01 | 0.442 | 0.425 | 1.07 | 0.96 | -1.2  | 2.80E-05 | 0.481 | 0.426 | 1.25 | 1.13 | -1.39 | 1.16 | 3.28E-04 | EPDR1(dist=65822), STARD3NL(dist=160444)     | intergenic     |
| 20 | 8695719   | T | C | rs6140701            | 5.85E-05 | 0.232 | 0.284 | 0.76 | 0.67 | -0.86 | 2.14E-01 | 0.248 | 0.255 | 0.96 | 0.85 | -1.08 | 0.85 | 3.29E-04 | PLCB1                                        | intronic       |
| 13 | 48103182  | G | T | rs115257045          | 5.60E-05 | 0.099 | 0.141 | 0.67 | 0.56 | -0.79 | 2.62E-01 | 0.109 | 0.110 | 0.99 | 0.84 | -1.17 | 0.79 | 3.30E-04 | HTR2A(dist=631971), LINC00562(dist=401106)   | intergenic     |
| 4  | 122577435 | G | T | rs10002413           | 4.62E-05 | 0.296 | 0.255 | 1.23 | 1.08 | -1.38 | 3.09E-01 | 0.271 | 0.255 | 1.09 | 0.97 | -1.22 | 1.20 | 3.31E-04 | QRFPFR(dist=275254), ANXA5(dist=11717)       | intergenic     |
| 13 | 48060638  | C | G | rs74073868           | 2.08E-05 | 0.072 | 0.113 | 0.61 | 0.5  | -0.74 | 3.72E-01 | 0.090 | 0.091 | 1.00 | 0.83 | -1.2  | 0.77 | 3.31E-04 | HTR2A(dist=589427), LINC00562(dist=443650)   | intergenic     |
| 18 | 69232198  | A | G | rs17084699           | 3.37E-01 | 0.043 | 0.041 | 1.06 | 0.8  | -1.39 | 2.35E-05 | 0.049 | 0.030 | 1.64 | 1.27 | -2.13 | 1.53 | 3.33E-04 | LINC01541                                    | ncRNA_intronic |
| 21 | 34121855  | T | C | rs9981311            | 9.18E-06 | 0.115 | 0.157 | 0.70 | 0.59 | -0.82 | 5.27E-01 | 0.133 | 0.136 | 0.98 | 0.84 | -1.14 | 0.80 | 3.34E-04 | PAXBP1                                       | intronic       |
| 5  | 133654200 | G | A | rs114954542          | 5.80E-05 | 0.033 | 0.056 | 0.57 | 0.43 | -0.75 | 3.63E-01 | 0.042 | 0.043 | 0.97 | 0.75 | -1.26 | 0.67 | 3.35E-04 | CDKL3                                        | intronic       |
| 6  | 29446855  | C | T | rs11963957           | 4.94E-01 | 0.129 | 0.126 | 1.03 | 0.87 | -1.21 | 7.92E-06 | 0.156 | 0.111 | 1.49 | 1.28 | -1.72 | 1.25 | 3.39E-04 | OR2H1(dist=14756), MAS1L(dist=7688)          | intergenic     |
| 3  | 64033043  | C | T | rs42456              | 4.64E-01 | 0.365 | 0.361 | 0.98 | 0.88 | -1.1  | 1.62E-05 | 0.409 | 0.358 | 0.81 | 0.73 | -0.9  | 0.86 | 3.42E-04 | PSMD6(dist=23357), PRICKLE2-AS1(dist=20597)  | intergenic     |
| 17 | 73784214  | G | A | rs12600868           | 3.57E-01 | 0.149 | 0.121 | 1.27 | 1.08 | -1.49 | 3.53E-05 | 0.204 | 0.186 | 1.12 | 0.99 | -1.28 | 1.23 | 3.43E-04 | UNK                                          | intronic       |
| 10 | 60209837  | G | C | rs1030433            | 2.88E-01 | 0.158 | 0.146 | 0.91 | 0.78 | -1.06 | 6.45E-05 | 0.202 | 0.169 | 0.80 | 0.7  | -0.91 | 0.81 | 3.44E-04 | TFAM(dist=50847), BICC1(dist=63067)          | intergenic     |
| 7  | 93057603  | T | C | rs4729090            | 2.69E-01 | 0.080 | 0.076 | 1.06 | 0.87 | -1.3  | 4.39E-05 | 0.092 | 0.064 | 1.49 | 1.24 | -1.8  | 1.32 | 3.46E-04 | CALCR                                        | intronic       |
| 8  | 38909156  | G | A | rs73674693           | 6.23E-01 | 0.082 | 0.084 | 0.98 | 0.8  | -1.19 | 2.75E-06 | 0.111 | 0.074 | 1.57 | 1.32 | -1.87 | 1.30 | 3.47E-04 | ADAM9                                        | intronic       |
| 19 | 36866498  | T | C | rs12971694           | 4.56E-01 | 0.249 | 0.255 | 1.03 | 0.91 | -1.17 | 2.06E-05 | 0.253 | 0.304 | 1.29 | 1.15 | -1.45 | 1.18 | 3.48E-04 | ZFP14                                        | intronic       |
| 15 | 89841719  | T | G | rs60942503           | 2.75E-01 | 0.042 | 0.038 | 1.11 | 0.84 | -1.47 | 4.56E-05 | 0.051 | 0.031 | 1.68 | 1.31 | -2.17 | 1.47 | 3.48E-04 | FANCI                                        | intronic       |
| 13 | 48120358  | G | A | rs55833859           | 5.39E-05 | 0.086 | 0.127 | 0.64 | 0.54 | -0.77 | 3.02E-01 | 0.095 | 0.096 | 0.99 | 0.83 | -1.18 | 0.78 | 3.51E-04 | HTR2A(dist=649147), LINC00562(dist=383930)   | intergenic     |
| 6  | 32511082  | C | T | rs188570958          | 4.21E-05 | 0.109 | 0.134 | 0.79 | 0.66 | -0.93 | 1.78E-01 | 0.150 | 0.169 | 0.87 | 0.75 | -1    | 0.78 | 3.52E-04 | HLA-DRB5(dist=13076), HLA-DRB6(dist=9408)    | intergenic     |
| 7  | 153922382 | G | A | rs73487458           | 1.84E-06 | 0.116 | 0.083 | 1.45 | 1.21 | -1.74 | 9.83E-01 | 0.094 | 0.091 | 1.04 | 0.87 | -1.25 | 1.31 | 3.52E-04 | DPP6                                         | intronic       |
| 10 | 87542984  | C | T | rs77743807           | 2.49E-05 | 0.083 | 0.114 | 0.70 | 0.58 | -0.85 | 2.56E-01 | 0.077 | 0.086 | 0.89 | 0.74 | -1.08 | 0.77 | 3.53E-04 | GRID1                                        | intronic       |
| 12 | 59157252  | C | T | rs1497237            | 2.59E-01 | 0.165 | 0.145 | 1.16 | 1    | -1.35 | 5.12E-05 | 0.179 | 0.161 | 1.13 | 0.99 | -1.3  | 1.27 | 3.54E-04 | LOC100506869, LOC101927653                   | ncRNA_intronic |
| 7  | 79028914  | G | C | rs77157421           | 3.96E-01 | 0.073 | 0.070 | 1.05 | 0.85 | -1.3  | 1.01E-05 | 0.094 | 0.065 | 1.50 | 1.24 | -1.8  | 1.34 | 3.58E-04 | MAGI2                                        | intronic       |

|    |           |   |   |                        |          |       |       |      |      |       |          |       |       |      |      |       |      |          |                                            |                |
|----|-----------|---|---|------------------------|----------|-------|-------|------|------|-------|----------|-------|-------|------|------|-------|------|----------|--------------------------------------------|----------------|
| 21 | 34038983  | A | G | rs844998               | 1.23E-05 | 0.125 | 0.169 | 0.70 | 0.6  | -0.82 | 5.23E-01 | 0.140 | 0.142 | 0.98 | 0.84 | -1.14 | 0.81 | 3.71E-04 | SYNJ1                                      | intronic       |
| 7  | 93058685  | G | A | rs17165396             | 3.24E-01 | 0.069 | 0.066 | 1.06 | 0.85 | -1.31 | 3.20E-05 | 0.086 | 0.059 | 1.51 | 1.24 | -1.83 | 1.34 | 3.73E-04 | CALCR                                      | intronic       |
| 1  | 152147305 | C | A | rs6667458              | 2.28E-01 | 0.121 | 0.108 | 0.87 | 0.73 | -1.03 | 5.00E-05 | 0.139 | 0.112 | 0.78 | 0.67 | -0.91 | 0.79 | 3.75E-04 | RPTN(dist=15601), HRNR(dist=37247)         | intergenic     |
| 20 | 30549557  | G | C | rs116599319            | 2.27E-01 | 0.029 | 0.026 | 1.13 | 0.81 | -1.57 | 5.52E-05 | 0.039 | 0.023 | 1.74 | 1.3  | -2.32 | 1.64 | 3.75E-04 | PDG1(dist=9674), XKR7(dist=6248)           | intergenic     |
| 1  | 90073167  | T | C | rs1215546              | 3.97E-05 | 0.517 | 0.446 | 0.75 | 0.67 | -0.84 | 3.42E-01 | 0.488 | 0.483 | 1.02 | 0.92 | -1.13 | 0.86 | 3.75E-04 | LRRC8B(dist=9747), FLJ27354(dist=17241)    | intergenic     |
| 6  | 29417571  | G | A | rs11968109             | 3.57E-01 | 0.089 | 0.083 | 1.09 | 0.89 | -1.32 | 3.07E-05 | 0.113 | 0.078 | 1.51 | 1.27 | -1.79 | 1.29 | 3.78E-04 | OR10C1(dist=8817), OR2H1(dist=8659)        | intergenic     |
| 7  | 79047850  | A | C | rs80041322             | 4.38E-01 | 0.073 | 0.070 | 1.05 | 0.85 | -1.29 | 8.22E-06 | 0.096 | 0.066 | 1.51 | 1.25 | -1.81 | 1.34 | 3.83E-04 | MAGI2                                      | intronic       |
| 7  | 93058882  | A | G | rs17165400             | 3.31E-01 | 0.069 | 0.066 | 1.05 | 0.85 | -1.31 | 3.15E-05 | 0.086 | 0.059 | 1.51 | 1.24 | -1.83 | 1.34 | 3.84E-04 | CALCR                                      | intronic       |
| 21 | 34063163  | C | G | rs7276517              | 1.35E-05 | 0.125 | 0.168 | 0.70 | 0.6  | -0.82 | 5.22E-01 | 0.139 | 0.141 | 0.98 | 0.84 | -1.14 | 0.81 | 3.84E-04 | SYNJ1                                      | intronic       |
| 5  | 176135248 | A | C | rs4470777              | 6.11E-05 | 0.098 | 0.069 | 1.46 | 1.2  | -1.78 | 3.65E-01 | 0.084 | 0.080 | 1.05 | 0.87 | -1.27 | 1.33 | 3.85E-04 | TSPAN17(dist=49189), LINC01574(dist=34958) | intergenic     |
| 10 | 64547920  | A | G | rs150904               | 3.04E-01 | 0.403 | 0.432 | 0.89 | 0.8  | -1    | 6.29E-05 | 0.361 | 0.403 | 0.84 | 0.75 | -0.93 | 0.86 | 3.89E-04 | ZNF365(dist=116149), ADO(dist=16596)       | intergenic     |
| 7  | 38059237  | T | A | rs6965880              | 3.89E-01 | 0.455 | 0.438 | 1.07 | 0.96 | -1.19 | 1.57E-05 | 0.506 | 0.453 | 1.24 | 1.11 | -1.37 | 1.16 | 3.91E-04 | EPDR1(dist=67695), STARD3NL(dist=158571)   | intergenic     |
| 21 | 27613403  | T | C | rs111586925            | 2.26E-05 | 0.045 | 0.067 | 0.66 | 0.52 | -0.84 | 3.17E-01 | 0.062 | 0.076 | 0.81 | 0.65 | -1    | 0.73 | 3.93E-04 | APP(dist=69957), CYR11(dist=225125)        | intergenic     |
| 10 | 87519372  | T | C | rs11814778;rs112447125 | 3.08E-05 | 0.074 | 0.102 | 0.70 | 0.57 | -0.85 | 2.03E-01 | 0.083 | 0.093 | 0.88 | 0.73 | -1.06 | 0.78 | 3.96E-04 | GRID1                                      | intronic       |
| 10 | 87519425  | C | T | rs11812444             | 3.08E-05 | 0.074 | 0.102 | 0.70 | 0.57 | -0.85 | 2.04E-01 | 0.083 | 0.093 | 0.88 | 0.73 | -1.06 | 0.78 | 4.00E-04 | GRID1                                      | intronic       |
| 21 | 34087136  | T | C | rs621337               | 1.28E-05 | 0.124 | 0.167 | 0.70 | 0.6  | -0.82 | 5.30E-01 | 0.140 | 0.142 | 0.98 | 0.84 | -1.14 | 0.81 | 4.05E-04 | SYNJ1                                      | intronic       |
| 7  | 38068104  | T | C | rs140019100            | 2.95E-01 | 0.196 | 0.191 | 1.03 | 0.9  | -1.19 | 1.95E-05 | 0.200 | 0.159 | 1.32 | 1.16 | -1.51 | 1.23 | 4.05E-04 | EPDR1(dist=76562), STARD3NL(dist=149704)   | intergenic     |
| 11 | 102694600 | G | A | rs142132409            | 3.24E-01 | 0.033 | 0.029 | 1.13 | 0.83 | -1.55 | 4.57E-05 | 0.043 | 0.025 | 1.78 | 1.35 | -2.35 | 1.54 | 4.05E-04 | WTAPP1                                     | ncRNA_intronic |
| 21 | 34052834  | A | G | rs844987               | 1.36E-05 | 0.125 | 0.168 | 0.70 | 0.6  | -0.82 | 5.32E-01 | 0.140 | 0.142 | 0.98 | 0.84 | -1.14 | 0.81 | 4.07E-04 | SYNJ1                                      | intronic       |
| 21 | 34039983  | G | A | rs844997               | 1.38E-05 | 0.124 | 0.168 | 0.70 | 0.6  | -0.82 | 5.29E-01 | 0.140 | 0.142 | 0.98 | 0.84 | -1.14 | 0.81 | 4.07E-04 | SYNJ1                                      | intronic       |
| 12 | 54523901  | C | G | rs56242321             | 3.81E-01 | 0.177 | 0.166 | 1.08 | 0.93 | -1.25 | 4.26E-05 | 0.222 | 0.189 | 1.22 | 1.08 | -1.39 | 1.22 | 4.13E-04 | LOC400043                                  | ncRNA_intronic |
| 17 | 73790974  | G | A | rs28578956             | 3.61E-01 | 0.145 | 0.117 | 1.28 | 1.09 | -1.51 | 4.81E-05 | 0.201 | 0.183 | 1.12 | 0.98 | -1.28 | 1.23 | 4.20E-04 | UNK                                        | intronic       |
| 11 | 5438746   | A | G | rs4910790              | 3.78E-01 | 0.491 | 0.491 | 1.00 | 0.9  | -1.11 | 3.62E-05 | 0.534 | 0.480 | 0.81 | 0.73 | -0.89 | 0.85 | 4.21E-04 | OR51B5                                     | intronic       |
| 2  | 30259377  | G | A | rs6723731              | 2.53E-05 | 0.305 | 0.339 | 0.85 | 0.76 | -0.96 | 4.94E-01 | 0.354 | 0.379 | 0.90 | 0.81 | -1    | 0.83 | 4.23E-04 | ALK(dist=114900), YPEL5(dist=110373)       | intergenic     |
| 21 | 34053961  | T | A | rs844988               | 1.54E-05 | 0.127 | 0.171 | 0.71 | 0.6  | -0.83 | 5.28E-01 | 0.140 | 0.143 | 0.98 | 0.85 | -1.14 | 0.81 | 4.24E-04 | SYNJ1                                      | intronic       |
| 10 | 87508242  | C | T | rs11201773             | 4.60E-05 | 0.072 | 0.100 | 0.70 | 0.57 | -0.86 | 1.82E-01 | 0.082 | 0.093 | 0.87 | 0.73 | -1.05 | 0.78 | 4.25E-04 | GRID1                                      | intronic       |
| 2  | 18465890  | G | A | rs6726057              | 4.59E-01 | 0.300 | 0.297 | 1.01 | 0.9  | -1.14 | 9.87E-06 | 0.330 | 0.269 | 1.34 | 1.19 | -1.49 | 1.17 | 4.27E-04 | KCNS3(dist=351665), RDH14(dist=270099)     | intergenic     |
| 8  | 38859104  | G | A | rs59451782             | 5.51E-01 | 0.075 | 0.076 | 0.99 | 0.81 | -1.22 | 7.93E-06 | 0.104 | 0.069 | 1.57 | 1.32 | -1.88 | 1.31 | 4.28E-04 | ADAM9                                      | intronic       |
| 6  | 29430829  | G | A | rs16894941             | 3.65E-01 | 0.091 | 0.085 | 1.09 | 0.9  | -1.32 | 3.11E-05 | 0.111 | 0.076 | 1.50 | 1.26 | -1.79 | 1.29 | 4.29E-04 | OR2H1(NM_030883:c.*332G>A)                 | UTR3           |
| 11 | 21562368  | C | A | rs11026130             | 4.83E-01 | 0.131 | 0.120 | 1.10 | 0.93 | -1.3  | 2.30E-05 | 0.108 | 0.160 | 0.63 | 0.54 | -0.75 | 0.81 | 4.35E-04 | NELL1                                      | intronic       |
| 11 | 21556768  | G | A | rs10833560             | 5.17E-01 | 0.133 | 0.122 | 1.10 | 0.94 | -1.3  | 1.86E-05 | 0.109 | 0.161 | 0.63 | 0.54 | -0.75 | 0.80 | 4.35E-04 | NELL1                                      | intronic       |
| 6  | 31532564  | C | A | rs3131641              | 3.22E-01 | 0.492 | 0.494 | 1.01 | 0.9  | -1.12 | 4.91E-05 | 0.544 | 0.482 | 1.28 | 1.15 | -1.42 | 1.15 | 4.36E-04 | NFKBIL1(dist=5958), LTA(dist=7312)         | intergenic     |
| 12 | 43024542  | C | T | rs146105541            | 6.25E-01 | 0.035 | 0.034 | 1.01 | 0.75 | -1.36 | 7.35E-06 | 0.051 | 0.029 | 1.82 | 1.41 | -2.36 | 1.50 | 4.40E-04 | LOC101927058                               | ncRNA_intronic |
| 10 | 34408467  | G | A | rs12264982             | 2.80E-05 | 0.235 | 0.298 | 0.72 | 0.64 | -0.82 | 2.64E-01 | 0.232 | 0.236 | 0.98 | 0.87 | -1.11 | 0.84 | 4.41E-04 | PARD3                                      | intronic       |
| 8  | 6423987   | G | A | rs7832816              | 2.66E-05 | 0.092 | 0.062 | 1.54 | 1.26 | -1.9  | 4.43E-01 | 0.068 | 0.065 | 1.06 | 0.86 | -1.3  | 1.33 | 4.41E-04 | MCPH1                                      | intronic       |
| 5  | 176135702 | A | T | rs115151016            | 5.44E-05 | 0.099 | 0.070 | 1.46 | 1.2  | -1.78 | 4.28E-01 | 0.085 | 0.082 | 1.04 | 0.87 | -1.26 | 1.32 | 4.46E-04 | TSPAN17(dist=49643), LINC01574(dist=34504) | intergenic     |
| 2  | 18420493  | A | G | rs13422960             | 3.65E-01 | 0.184 | 0.183 | 1.01 | 0.88 | -1.16 | 2.56E-05 | 0.215 | 0.168 | 1.36 | 1.19 | -1.54 | 1.20 | 4.50E-04 | KCNS3(dist=306268), RDH14(dist=315496)     | intergenic     |
| 4  | 58622776  | G | T | rs113284537            | 7.27E-01 | 0.042 | 0.040 | 1.05 | 0.79 | -1.38 | 2.27E-06 | 0.051 | 0.028 | 1.89 | 1.46 | -2.44 | 1.45 | 4.51E-04 | LOC101928851(dist=290624), NONE(dist=NONE) | intergenic     |
| 5  | 13921373  | G | A | rs6869548              | 4.50E-01 | 0.491 | 0.502 | 0.96 | 0.86 | -1.07 | 1.68E-05 | 0.445 | 0.497 | 0.81 | 0.73 | -0.9  | 0.87 | 4.51E-04 | DNAH5                                      | intronic       |
| 2  | 205081598 | A | G | rs10932052             | 2.86E-01 | 0.296 | 0.283 | 1.07 | 0.95 | -1.2  | 3.44E-05 | 0.344 | 0.305 | 1.19 | 1.07 | -1.33 | 1.18 | 4.52E-04 | ICOS(dist=255300), PARD3B(dist=328918)     | intergenic     |
| 2  | 18447945  | G | A | rs6754763              | 5.03E-01 | 0.343 | 0.339 | 1.02 | 0.91 | -1.14 | 8.98E-06 | 0.366 | 0.305 | 1.32 | 1.18 | -1.47 | 1.16 | 4.57E-04 | KCNS3(dist=333720), RDH14(dist=288044)     | intergenic     |
| 9  | 113102194 | T | C | rs9696186              | 4.10E-05 | 0.423 | 0.458 | 1.15 | 1.03 | -1.29 | 2.98E-01 | 0.454 | 0.478 | 1.10 | 0.99 | -1.22 | 1.18 | 4.58E-04 | TXNDC8(dist=2030), SVEP1(dist=25335)       | intergenic     |
| 1  | 81094204  | G | A | rs72933084             | 4.56E-05 | 0.156 | 0.124 | 1.30 | 1.11 | -1.52 | 4.19E-01 | 0.136 | 0.123 | 1.12 | 0.96 | -1.31 | 1.25 | 4.65E-04 | LOC101927412                               | ncRNA_intronic |
| 7  | 79046112  | G | A | rs2190180              | 4.00E-01 | 0.073 | 0.070 | 1.05 | 0.85 | -1.3  | 1.62E-05 | 0.094 | 0.066 | 1.48 | 1.23 | -1.79 | 1.33 | 4.67E-04 | MAGI2                                      | intronic       |
| 10 | 87500572  | G | A | rs12098860             | 3.61E-05 | 0.069 | 0.096 | 0.70 | 0.57 | -0.85 | 1.97E-01 | 0.083 | 0.093 | 0.88 | 0.73 | -1.06 | 0.78 | 4.67E-04 | GRID1                                      | intronic       |
| 4  | 58622334  | A | G | rs147270744            | 6.49E-01 | 0.045 | 0.043 | 1.06 | 0.81 | -1.38 | 5.43E-06 | 0.056 | 0.033 | 1.76 | 1.38 | -2.24 | 1.44 | 4.70E-04 | LOC101928851(dist=290182), NONE(dist=NONE) | intergenic     |
| 7  | 38041053  | T | C | rs4475393              | 3.92E-01 | 0.490 | 0.506 | 1.07 | 0.95 | -1.19 | 1.95E-05 | 0.442 | 0.497 | 1.25 | 1.12 | -1.38 | 1.15 | 4.71E-04 | EPDR1(dist=49511), STARD3NL(dist=176755)   | intergenic     |
| 9  | 113106896 | G | A | rs75043681             | 4.87E-05 | 0.081 | 0.059 | 1.40 | 1.13 | -1.74 | 2.50E-01 | 0.070 | 0.060 | 1.17 | 0.95 | -1.45 | 1.37 | 4.72E-04 | TXNDC8(dist=6732), SVEP1(dist=20633)       | intergenic     |
| 12 | 43018501  | A | G | rs74819725             | 5.83E-01 | 0.036 | 0.035 | 1.02 | 0.76 | -1.36 | 1.14E-05 | 0.051 | 0.029 | 1.82 | 1.41 | -2.35 | 1.49 | 4.72E-04 | LOC101927058                               | ncRNA_intronic |
| 10 | 87497616  | C | T | rs11814325             | 5.13E-05 | 0.072 | 0.099 | 0.70 | 0.57 | -0.86 | 1.88E-01 | 0.083 | 0.093 | 0.88 | 0.73 | -1.06 | 0.78 | 4.74E-04 | GRID1                                      | intronic       |
| 2  | 61869067  | G | T | rs183577321            | 2.44E-05 | 0.029 | 0.054 | 0.52 | 0.39 | -0.7  | 4.56E-01 | 0.040 | 0.041 | 0.97 | 0.75 | -1.27 | 0.68 | 4.74E-04 | XPO1(dist=103649), FAM161A(dist=182916)    | intergenic     |
| 2  | 61869063  | G | C | rs191468823            | 2.44E-05 | 0.029 | 0.054 | 0.52 | 0.39 | -0.7  | 4.56E-01 | 0.040 | 0.041 | 0.97 | 0.75 | -1.27 | 0.68 | 4.75E-04 | XPO1(dist=103645), FAM161A(dist=182920)    | intergenic     |
| 6  | 29422516  | G | A | rs115047029            | 3.64E-01 | 0.089 | 0.083 | 1.09 | 0.89 | -1.32 | 4.17E-05 | 0.112 | 0.077 | 1.51 | 1.27 | -1.79 | 1.29 | 4.75E-04 | OR10C1(dist=13762), OR2H1(dist=3714)       | intergenic     |
| 21 | 34069146  | G | A | rs844983               | 1.45E-05 | 0.124 | 0.167 | 0.70 | 0.6  | -0.83 | 5.62E-01 | 0.139 | 0.141 | 0.98 | 0.85 | -1.14 | 0.81 | 4.75E-04 | SYNJ1                                      | intronic       |
| 10 | 87532089  | G | A | rs12358645             | 3.35E-05 | 0.075 | 0.103 | 0.70 | 0.58 | -0.86 | 2.24E-01 | 0.083 | 0.092 | 0.89 | 0.73 | -1.07 | 0.78 | 4.76E-04 | GRID1                                      | intronic       |
| 1  | 1053724   | A | G | rs4970411              | 3.20E-01 | 0.446 | 0.449 | 0.99 | 0.89 | -1.11 | 5.38E-05 | 0.456 | 0.392 | 1.30 | 1.17 | -1.44 | 1.16 | 4.76E-04 | C1orf159(dist=1988), LINC01342(dist=18673) | intergenic     |
| 1  | 81092810  | C | A | rs112810298            | 4.45E-05 | 0.156 | 0.124 | 1.30 | 1.11 | -1.52 | 4.28E-01 | 0.136 | 0.123 | 1.12 | 0.96 | -1.31 | 1.25 | 4.77E-04 | LOC101927412                               | ncRNA_intronic |
| 3  | 115528296 | C | T | rs72947885             | 4.16E-05 | 0.074 | 0.054 | 1.40 | 1.12 | -1.75 | 4.49E-01 | 0.059 |       |      |      |       |      |          |                                            |                |

|    |           |   |   |             |          |       |       |      |      |       |          |       |       |      |      |       |      |          |                                               |                |
|----|-----------|---|---|-------------|----------|-------|-------|------|------|-------|----------|-------|-------|------|------|-------|------|----------|-----------------------------------------------|----------------|
| 7  | 153907107 | T | C | rs73485461  | 4.29E-05 | 0.118 | 0.088 | 1.38 | 1.15 | -1.65 | 4.83E-01 | 0.097 | 0.090 | 1.10 | 0.92 | -1.31 | 1.29 | 4.95E-04 | DPP6                                          | intronic       |
| 16 | 65902516  | A | G | rs17608497  | 2.20E-05 | 0.084 | 0.113 | 0.72 | 0.6  | -0.87 | 4.91E-01 | 0.105 | 0.111 | 0.94 | 0.79 | -1.11 | 0.76 | 4.95E-04 | LINC00922(dist=292313), CDH5(dist=498009)     | intergenic     |
| 7  | 79007299  | G | A | rs76068105  | 3.07E-01 | 0.062 | 0.059 | 1.06 | 0.84 | -1.33 | 2.68E-05 | 0.081 | 0.057 | 1.48 | 1.21 | -1.8  | 1.37 | 5.00E-04 | MAGI2                                         | intronic       |
| 5  | 149533976 | G | T | rs11167497  | 3.68E-01 | 0.051 | 0.041 | 1.26 | 0.97 | -1.64 | 5.65E-05 | 0.075 | 0.059 | 1.29 | 1.06 | -1.58 | 1.41 | 5.00E-04 | PDGFRB                                        | intronic       |
| 17 | 78332914  | G | T | rs8072622   | 2.55E-01 | 0.178 | 0.164 | 0.91 | 0.78 | -1.05 | 5.53E-05 | 0.236 | 0.206 | 0.84 | 0.74 | -0.95 | 0.83 | 5.01E-04 | LOC100294362                                  | ncRNA_intronic |
| 14 | 85459876  | A | G | rs114508225 | 3.47E-05 | 0.051 | 0.035 | 1.50 | 1.14 | -1.97 | 5.61E-01 | 0.027 | 0.024 | 1.11 | 0.8  | -1.54 | 1.66 | 5.01E-04 | NONE(dist=NONE), LINC00911(dist=400347)       | intergenic     |
| 7  | 141248475 | G | A | rs3757470   | 2.64E-05 | 0.222 | 0.165 | 1.45 | 1.26 | -1.66 | 4.68E-01 | 0.207 | 0.208 | 0.99 | 0.87 | -1.13 | 1.20 | 5.05E-04 | TMEM178B(dist=68296), AGK(dist=2603)          | intergenic     |
| 8  | 38898288  | A | G | rs58971487  | 7.27E-01 | 0.079 | 0.082 | 0.96 | 0.79 | -1.18 | 2.82E-06 | 0.109 | 0.073 | 1.56 | 1.31 | -1.86 | 1.30 | 5.07E-04 | ADAM9                                         | intronic       |
| 4  | 7755272   | G | A | rs16841024  | 3.13E-06 | 0.049 | 0.029 | 1.73 | 1.3  | -2.3  | 9.38E-01 | 0.033 | 0.031 | 1.05 | 0.78 | -1.41 | 1.52 | 5.08E-04 | AFAP1-AS1                                     | upstream       |
| 8  | 50822736  | G | C | rs2449960   | 5.36E-01 | 0.444 | 0.454 | 1.04 | 0.93 | -1.16 | 1.54E-05 | 0.469 | 0.398 | 0.75 | 0.67 | -0.83 | 0.86 | 5.08E-04 | SNTG1                                         | intronic       |
| 2  | 103001402 | C | T | rs1035130   | 4.21E-01 | 0.151 | 0.153 | 0.98 | 0.85 | -1.15 | 2.67E-05 | 0.131 | 0.176 | 0.71 | 0.61 | -0.82 | 0.82 | 5.10E-04 | IL18R1                                        | exonic         |
| 6  | 108532862 | C | T | rs75854152  | 4.14E-01 | 0.096 | 0.107 | 0.89 | 0.74 | -1.07 | 1.90E-05 | 0.080 | 0.103 | 0.76 | 0.63 | -0.91 | 0.78 | 5.12E-04 | SNX3                                          | UTR3           |
| 16 | 65898936  | G | T | rs166213    | 3.83E-05 | 0.043 | 0.060 | 1.41 | 1.1  | -1.82 | 2.14E-01 | 0.076 | 0.087 | 1.16 | 0.95 | -1.4  | 1.36 | 5.13E-04 | LINC00922(dist=288733), CDH5(dist=501589)     | intergenic     |
| 7  | 79052139  | T | C | rs17152485  | 5.22E-01 | 0.073 | 0.072 | 1.03 | 0.83 | -1.27 | 6.98E-06 | 0.096 | 0.066 | 1.51 | 1.25 | -1.81 | 1.33 | 5.14E-04 | MAGI2                                         | intronic       |
| 5  | 117793404 | C | T | rs72793511  | 2.67E-01 | 0.186 | 0.180 | 1.04 | 0.91 | -1.2  | 6.22E-05 | 0.204 | 0.161 | 1.33 | 1.17 | -1.52 | 1.21 | 5.16E-04 | LOC101927280                                  | ncRNA_intronic |
| 21 | 34115455  | T | C | rs2298365   | 2.35E-05 | 0.126 | 0.168 | 0.71 | 0.61 | -0.83 | 5.15E-01 | 0.139 | 0.141 | 0.98 | 0.84 | -1.14 | 0.81 | 5.18E-04 | PAXBP1                                        | intronic       |
| 5  | 123813111 | C | T | rs79139825  | 5.54E-01 | 0.055 | 0.053 | 1.06 | 0.83 | -1.34 | 1.14E-05 | 0.071 | 0.046 | 1.58 | 1.28 | -1.96 | 1.39 | 5.19E-04 | LINC01170(dist=38898), ZNF608(dist=159499)    | intergenic     |
| 7  | 93059836  | C | T | rs17165408  | 3.81E-01 | 0.068 | 0.066 | 1.04 | 0.84 | -1.3  | 3.46E-05 | 0.085 | 0.058 | 1.50 | 1.23 | -1.82 | 1.34 | 5.20E-04 | CALCR                                         | intronic       |
| 2  | 211939224 | C | T | rs16845277  | 3.83E-01 | 0.140 | 0.138 | 1.02 | 0.87 | -1.2  | 2.21E-05 | 0.154 | 0.113 | 1.42 | 1.22 | -1.65 | 1.24 | 5.20E-04 | CPS1(dist=395392), ERBB4(dist=301218)         | intergenic     |
| 4  | 58609794  | A | G | rs111936752 | 7.85E-01 | 0.047 | 0.046 | 1.03 | 0.8  | -1.34 | 2.25E-06 | 0.058 | 0.032 | 1.83 | 1.44 | -2.33 | 1.41 | 5.24E-04 | LOC101928851(dist=277642), NONE(dist=NONE)    | intergenic     |
| 5  | 13919578  | G | A | rs12655818  | 4.87E-01 | 0.490 | 0.500 | 0.96 | 0.86 | -1.07 | 1.57E-05 | 0.445 | 0.497 | 0.81 | 0.73 | -0.9  | 0.87 | 5.28E-04 | DNAH5                                         | intronic       |
| 7  | 79057645  | C | A | rs75121608  | 4.50E-01 | 0.075 | 0.072 | 1.04 | 0.84 | -1.28 | 1.49E-05 | 0.097 | 0.067 | 1.49 | 1.24 | -1.79 | 1.33 | 5.29E-04 | MAGI2                                         | intronic       |
| 11 | 21547313  | C | T | rs4291670   | 4.81E-01 | 0.138 | 0.129 | 1.08 | 0.92 | -1.27 | 3.00E-05 | 0.114 | 0.165 | 0.65 | 0.56 | -0.77 | 0.81 | 5.30E-04 | NELL1                                         | intronic       |
| 7  | 153899034 | T | C | rs28665072  | 6.01E-06 | 0.139 | 0.104 | 1.40 | 1.18 | -1.65 | 8.66E-01 | 0.105 | 0.101 | 1.05 | 0.88 | -1.24 | 1.27 | 5.30E-04 | DPP6                                          | intronic       |
| 4  | 58610780  | C | T | rs145949331 | 7.87E-01 | 0.047 | 0.046 | 1.03 | 0.79 | -1.34 | 2.27E-06 | 0.058 | 0.032 | 1.83 | 1.44 | -2.33 | 1.41 | 5.31E-04 | LOC101928851(dist=278628), NONE(dist=NONE)    | intergenic     |
| 14 | 21239846  | A | C | rs79214935  | 1.70E-05 | 0.148 | 0.116 | 1.32 | 1.13 | -1.56 | 5.62E-01 | 0.112 | 0.105 | 1.08 | 0.91 | -1.27 | 1.28 | 5.32E-04 | EDDM3B                                        | downstream     |
| 4  | 58611479  | C | T | rs4865276   | 7.89E-01 | 0.047 | 0.046 | 1.03 | 0.79 | -1.33 | 2.28E-06 | 0.058 | 0.032 | 1.83 | 1.44 | -2.33 | 1.41 | 5.35E-04 | LOC101928851(dist=279327), NONE(dist=NONE)    | intergenic     |
| 8  | 66555442  | C | G | rs66851666  | 6.52E-01 | 0.073 | 0.068 | 1.07 | 0.87 | -1.33 | 8.16E-06 | 0.099 | 0.072 | 1.42 | 1.18 | -1.7  | 1.31 | 5.41E-04 | ARMC1(dist=8990), MTFR1(dist=1446)            | intergenic     |
| 5  | 123811427 | T | C | rs79754969  | 6.29E-01 | 0.056 | 0.054 | 1.04 | 0.82 | -1.32 | 8.24E-06 | 0.071 | 0.045 | 1.61 | 1.3  | -1.99 | 1.39 | 5.43E-04 | LINC01170(dist=37214), ZNF608(dist=161183)    | intergenic     |
| 10 | 56361476  | T | C | rs4935525   | 2.02E-06 | 0.260 | 0.323 | 1.36 | 1.2  | -1.54 | 6.43E-01 | 0.275 | 0.277 | 1.01 | 0.9  | -1.14 | 1.18 | 5.45E-04 | PCDH15                                        | intronic       |
| 8  | 66530244  | G | A | rs144483374 | 6.64E-01 | 0.073 | 0.068 | 1.07 | 0.86 | -1.33 | 7.42E-06 | 0.099 | 0.072 | 1.42 | 1.19 | -1.7  | 1.31 | 5.45E-04 | ARMC1                                         | intronic       |
| 8  | 66536135  | C | T | rs147230370 | 6.64E-01 | 0.073 | 0.068 | 1.07 | 0.86 | -1.33 | 7.43E-06 | 0.099 | 0.072 | 1.42 | 1.19 | -1.7  | 1.31 | 5.45E-04 | ARMC1                                         | intronic       |
| 8  | 66538975  | G | A | rs66850618  | 6.64E-01 | 0.073 | 0.068 | 1.07 | 0.86 | -1.33 | 7.43E-06 | 0.099 | 0.072 | 1.42 | 1.19 | -1.7  | 1.31 | 5.45E-04 | ARMC1                                         | intronic       |
| 8  | 66545781  | C | G | rs68077070  | 6.64E-01 | 0.073 | 0.068 | 1.07 | 0.86 | -1.33 | 7.44E-06 | 0.099 | 0.072 | 1.42 | 1.19 | -1.7  | 1.31 | 5.45E-04 | ARMC1                                         | intronic       |
| 5  | 13920362  | G | A | rs11745217  | 4.90E-01 | 0.490 | 0.500 | 0.96 | 0.86 | -1.07 | 1.63E-05 | 0.445 | 0.497 | 0.81 | 0.73 | -0.9  | 0.87 | 5.47E-04 | DNAH5                                         | intronic       |
| 3  | 134590260 | T | G | rs77406785  | 6.43E-01 | 0.024 | 0.024 | 1.00 | 0.7  | -1.43 | 2.31E-05 | 0.046 | 0.030 | 1.54 | 1.19 | -2.01 | 1.74 | 5.49E-04 | EPHB1                                         | intronic       |
| 2  | 224815458 | T | C | rs60476567  | 4.42E-06 | 0.048 | 0.026 | 1.91 | 1.42 | -2.57 | 9.18E-01 | 0.030 | 0.029 | 1.03 | 0.76 | -1.41 | 1.55 | 5.51E-04 | WDFY1(dist=5354), MRPL44(dist=6663)           | intergenic     |
| 1  | 1037367   | G | A | rs11260594  | 3.53E-01 | 0.428 | 0.429 | 1.00 | 0.89 | -1.11 | 6.18E-05 | 0.462 | 0.398 | 1.30 | 1.17 | -1.44 | 1.16 | 5.51E-04 | C1orf159                                      | intronic       |
| 6  | 108543966 | C | G | rs58497731  | 4.48E-01 | 0.096 | 0.106 | 0.89 | 0.74 | -1.07 | 1.67E-05 | 0.080 | 0.103 | 0.75 | 0.62 | -0.91 | 0.78 | 5.54E-04 | SNX3                                          | intronic       |
| 11 | 102677830 | T | A | rs115066265 | 5.91E-01 | 0.027 | 0.026 | 1.07 | 0.76 | -1.5  | 2.20E-05 | 0.042 | 0.023 | 1.88 | 1.41 | -2.49 | 1.55 | 5.55E-04 | WTAPP1                                        | ncRNA_intronic |
| 5  | 123805229 | A | G | rs79774430  | 6.01E-01 | 0.058 | 0.055 | 1.05 | 0.83 | -1.33 | 1.08E-05 | 0.071 | 0.046 | 1.60 | 1.29 | -1.99 | 1.38 | 5.55E-04 | LINC01170(dist=31016), ZNF608(dist=167381)    | intergenic     |
| 2  | 224813548 | T | G | rs73992129  | 4.49E-06 | 0.048 | 0.026 | 1.91 | 1.42 | -2.57 | 9.19E-01 | 0.030 | 0.029 | 1.03 | 0.76 | -1.41 | 1.55 | 5.56E-04 | WDFY1(dist=3444), MRPL44(dist=8573)           | intergenic     |
| 5  | 123807750 | T | A | rs60591660  | 6.24E-01 | 0.057 | 0.055 | 1.04 | 0.82 | -1.32 | 9.16E-06 | 0.071 | 0.046 | 1.61 | 1.3  | -1.99 | 1.38 | 5.56E-04 | LINC01170(dist=33537), ZNF608(dist=164860)    | intergenic     |
| 21 | 34114123  | A | G | rs12627478  | 2.35E-05 | 0.126 | 0.168 | 0.71 | 0.61 | -0.83 | 5.32E-01 | 0.140 | 0.142 | 0.98 | 0.85 | -1.14 | 0.82 | 5.57E-04 | PAXBP1-AS1                                    | ncRNA_intronic |
| 5  | 149533956 | T | G | rs11167496  | 3.75E-01 | 0.051 | 0.041 | 1.26 | 0.97 | -1.63 | 6.41E-05 | 0.076 | 0.060 | 1.29 | 1.05 | -1.58 | 1.40 | 5.63E-04 | PDGFRB                                        | intronic       |
| 5  | 123810199 | G | A | rs112139503 | 6.38E-01 | 0.057 | 0.055 | 1.04 | 0.82 | -1.32 | 8.44E-06 | 0.071 | 0.046 | 1.61 | 1.3  | -1.99 | 1.38 | 5.63E-04 | LINC01170(dist=35986), ZNF608(dist=162411)    | intergenic     |
| 5  | 13457782  | T | C | rs13354360  | 4.21E-01 | 0.067 | 0.060 | 1.13 | 0.9  | -1.41 | 3.09E-05 | 0.091 | 0.070 | 1.34 | 1.11 | -1.62 | 1.35 | 5.64E-04 | LINC01194(dist=652487), DNAH5(dist=232655)    | intergenic     |
| 8  | 66488718  | T | C | rs67020592  | 5.90E-01 | 0.073 | 0.068 | 1.08 | 0.87 | -1.34 | 1.34E-05 | 0.098 | 0.072 | 1.41 | 1.18 | -1.69 | 1.31 | 5.68E-04 | LINC01299(dist=13817), ARMC1(dist=25973)      | intergenic     |
| 10 | 87506141  | A | G | rs11201770  | 6.37E-05 | 0.074 | 0.101 | 0.72 | 0.59 | -0.87 | 2.00E-01 | 0.086 | 0.096 | 0.88 | 0.74 | -1.06 | 0.78 | 5.70E-04 | GRID1                                         | intronic       |
| 8  | 66487345  | G | A | rs77019597  | 5.91E-01 | 0.073 | 0.068 | 1.08 | 0.87 | -1.34 | 1.37E-05 | 0.098 | 0.072 | 1.41 | 1.18 | -1.69 | 1.31 | 5.73E-04 | LINC01299(dist=12444), ARMC1(dist=27346)      | intergenic     |
| 8  | 66487080  | G | A | rs67578031  | 5.90E-01 | 0.073 | 0.068 | 1.08 | 0.87 | -1.34 | 1.37E-05 | 0.098 | 0.072 | 1.41 | 1.18 | -1.69 | 1.31 | 5.74E-04 | LINC01299(dist=12179), ARMC1(dist=27611)      | intergenic     |
| 8  | 66523271  | C | T | rs113546214 | 6.36E-01 | 0.071 | 0.066 | 1.08 | 0.87 | -1.34 | 7.44E-06 | 0.093 | 0.068 | 1.41 | 1.17 | -1.7  | 1.32 | 5.80E-04 | ARMC1                                         | intronic       |
| 10 | 53455862  | A | G | rs16921605  | 1.37E-05 | 0.118 | 0.161 | 0.70 | 0.59 | -0.82 | 3.59E-01 | 0.130 | 0.137 | 0.94 | 0.81 | -1.1  | 0.81 | 5.84E-04 | CSTF2T(NM_015235:c.*1597T>C)                  | UTR3           |
| 6  | 31568469  | G | A | rs2857595   | 4.95E-01 | 0.440 | 0.443 | 0.99 | 0.89 | -1.1  | 1.90E-05 | 0.471 | 0.405 | 1.31 | 1.18 | -1.45 | 1.16 | 5.87E-04 | NCR3(dist=7707), AIF1(dist=14525)             | intergenic     |
| 4  | 85375567  | C | T | rs763540    | 4.60E-01 | 0.328 | 0.320 | 1.04 | 0.92 | -1.17 | 4.71E-05 | 0.353 | 0.302 | 1.26 | 1.13 | -1.4  | 1.16 | 5.89E-04 | LOC101928978(dist=155245), NKX6-1(dist=38869) | intergenic     |
| 18 | 72908354  | A | G | rs145717809 | 1.30E-05 | 0.068 | 0.044 | 1.58 | 1.25 | -2.01 | 8.37E-01 | 0.037 | 0.035 | 1.06 | 0.81 | -1.4  | 1.42 | 5.89E-04 | ZADH2                                         | downstream     |
| 11 | 102706229 | A | G | rs3025080   | 3.91E-01 | 0.030 | 0.027 | 1.11 | 0.8  | -1.54 | 6.45E-05 | 0.040 | 0.022 | 1.83 | 1.37 | -2.45 | 1.55 | 5.95E-04 | WTAPP1                                        | ncRNA_intronic |
| 2  | 102995020 | G | A | rs2080289   | 4.56E-01 | 0.152 | 0.153 | 0.99 | 0.85 | -1.15 | 2.65E-05 | 0.131 | 0.176 | 0.71 |      |       |      |          |                                               |                |

|    |           |   |   |                         |          |       |       |      |      |       |          |       |       |      |      |       |      |          |                                                |                |
|----|-----------|---|---|-------------------------|----------|-------|-------|------|------|-------|----------|-------|-------|------|------|-------|------|----------|------------------------------------------------|----------------|
| 10 | 60177331  | A | G | rs2086784               | 4.36E-01 | 0.153 | 0.144 | 0.93 | 0.8  | -1.08 | 5.77E-05 | 0.204 | 0.170 | 0.80 | 0.7  | -0.91 | 0.82 | 6.06E-04 | TFAM(dist=18341), BICC1(dist=95573)            | intergenic     |
| 19 | 36886705  | C | A | rs2945963               | 4.50E-01 | 0.236 | 0.243 | 1.04 | 0.91 | -1.18 | 5.67E-05 | 0.232 | 0.282 | 1.30 | 1.15 | -1.47 | 1.17 | 6.09E-04 | ZFP82                                          | intronic       |
| 10 | 60176068  | A | G | rs7903523               | 4.37E-01 | 0.153 | 0.144 | 0.93 | 0.8  | -1.08 | 5.81E-05 | 0.204 | 0.170 | 0.80 | 0.7  | -0.91 | 0.82 | 6.09E-04 | TFAM(dist=17078), BICC1(dist=96836)            | intergenic     |
| 8  | 66528700  | C | T | rs146107538             | 6.65E-01 | 0.085 | 0.081 | 1.06 | 0.87 | -1.29 | 8.25E-06 | 0.107 | 0.080 | 1.38 | 1.16 | -1.65 | 1.30 | 6.09E-04 | ARMC1                                          | intronic       |
| 18 | 69243737  | G | A | rs115045386;rs386804677 | 3.67E-01 | 0.032 | 0.030 | 1.06 | 0.78 | -1.46 | 5.55E-05 | 0.037 | 0.022 | 1.68 | 1.25 | -2.26 | 1.64 | 6.10E-04 | LINC01541                                      | ncRNA_intronic |
| 11 | 7857379   | A | C | rs2361059               | 9.71E-01 | 0.366 | 0.352 | 1.07 | 0.95 | -1.2  | 1.48E-06 | 0.315 | 0.387 | 0.73 | 0.65 | -0.81 | 0.86 | 6.19E-04 | OR5P3(dist=9860), OR5E1P(dist=13219)           | intergenic     |
| 2  | 102997733 | G | T | rs11465633              | 4.52E-01 | 0.151 | 0.153 | 0.99 | 0.85 | -1.15 | 2.90E-05 | 0.131 | 0.176 | 0.71 | 0.61 | -0.82 | 0.83 | 6.20E-04 | IL18R1                                         | intronic       |
| 2  | 102996872 | C | T | rs3821203               | 4.52E-01 | 0.151 | 0.153 | 0.99 | 0.85 | -1.15 | 2.89E-05 | 0.131 | 0.176 | 0.71 | 0.61 | -0.82 | 0.83 | 6.20E-04 | IL18R1                                         | intronic       |
| 2  | 102997174 | A | T | rs3771162               | 4.52E-01 | 0.151 | 0.153 | 0.99 | 0.85 | -1.15 | 2.90E-05 | 0.131 | 0.176 | 0.71 | 0.61 | -0.82 | 0.83 | 6.20E-04 | IL18R1                                         | intronic       |
| 1  | 1039817   | A | G | rs11581598              | 4.07E-01 | 0.440 | 0.445 | 0.98 | 0.88 | -1.1  | 6.09E-05 | 0.475 | 0.409 | 1.31 | 1.18 | -1.45 | 1.15 | 6.22E-04 | C1orf159                                       | intronic       |
| 2  | 102994884 | A | G | rs17027037              | 4.53E-01 | 0.151 | 0.153 | 0.99 | 0.85 | -1.15 | 2.89E-05 | 0.131 | 0.176 | 0.71 | 0.61 | -0.82 | 0.83 | 6.22E-04 | IL18R1                                         | intronic       |
| 2  | 102992079 | A | G | rs2270298               | 4.52E-01 | 0.151 | 0.153 | 0.99 | 0.85 | -1.15 | 2.95E-05 | 0.131 | 0.176 | 0.71 | 0.61 | -0.82 | 0.83 | 6.28E-04 | IL18R1                                         | intronic       |
| 11 | 7854876   | G | A | rs10769837              | 6.76E-01 | 0.406 | 0.385 | 1.09 | 0.97 | -1.22 | 1.39E-07 | 0.341 | 0.419 | 0.72 | 0.64 | -0.8  | 0.87 | 6.28E-04 | OR5P3(dist=7357), OR5E1P(dist=15722)           | intergenic     |
| 15 | 75147332  | A | C | rs1869959               | 8.15E-05 | 0.400 | 0.459 | 1.27 | 1.14 | -1.42 | 5.60E-01 | 0.410 | 0.413 | 1.01 | 0.91 | -1.12 | 1.15 | 6.30E-04 | SCAMP2                                         | intronic       |
| 4  | 58616435  | G | T | rs73187474              | 8.25E-01 | 0.047 | 0.046 | 1.02 | 0.79 | -1.33 | 2.45E-06 | 0.058 | 0.033 | 1.83 | 1.44 | -2.32 | 1.40 | 6.30E-04 | LOC101928851(dist=284283), NONE(dist=NONE)     | intergenic     |
| 8  | 66482521  | T | C | rs149718031             | 5.89E-01 | 0.073 | 0.068 | 1.08 | 0.87 | -1.34 | 1.63E-05 | 0.098 | 0.072 | 1.41 | 1.17 | -1.69 | 1.30 | 6.31E-04 | LINC01299(dist=7620), ARMC1(dist=32170)        | intergenic     |
| 1  | 1046164   | C | T | rs386627439;rs6666280   | 4.16E-01 | 0.446 | 0.449 | 0.99 | 0.88 | -1.1  | 4.36E-05 | 0.469 | 0.402 | 1.31 | 1.18 | -1.45 | 1.15 | 6.32E-04 | C1orf159                                       | intronic       |
| 8  | 66556187  | C | T | rs10504389              | 6.84E-01 | 0.074 | 0.070 | 1.07 | 0.87 | -1.32 | 9.43E-06 | 0.099 | 0.072 | 1.42 | 1.18 | -1.7  | 1.30 | 6.37E-04 | MTRF1                                          | upstream       |
| 2  | 103019782 | G | A | rs55742125              | 3.86E-01 | 0.146 | 0.148 | 0.98 | 0.84 | -1.15 | 5.34E-05 | 0.127 | 0.171 | 0.71 | 0.61 | -0.82 | 0.83 | 6.40E-04 | IL18R1(dist=4547), IL18RAP(dist=15468)         | intergenic     |
| 6  | 31510935  | C | G | rs386699236;rs3130629   | 4.71E-01 | 0.479 | 0.477 | 0.99 | 0.89 | -1.11 | 3.02E-05 | 0.444 | 0.507 | 1.29 | 1.16 | -1.43 | 1.15 | 6.41E-04 | ATP6V1G2-DDX39B                                | ncRNA_intronic |
| 10 | 108227432 | G | A | rs2177823               | 4.42E-05 | 0.112 | 0.085 | 1.36 | 1.13 | -1.63 | 3.52E-01 | 0.085 | 0.077 | 1.12 | 0.92 | -1.35 | 1.33 | 6.44E-04 | LOC101927549(dist=647341), SORCS1(dist=105989) | intergenic     |
| 8  | 38889598  | C | T | rs78227456              | 7.73E-01 | 0.077 | 0.080 | 0.96 | 0.78 | -1.17 | 3.47E-06 | 0.107 | 0.071 | 1.58 | 1.32 | -1.88 | 1.30 | 6.46E-04 | ADAM9                                          | intronic       |
| 8  | 38889871  | G | A | rs143600640             | 7.73E-01 | 0.077 | 0.080 | 0.96 | 0.78 | -1.17 | 3.48E-06 | 0.107 | 0.071 | 1.58 | 1.32 | -1.88 | 1.30 | 6.47E-04 | ADAM9                                          | intronic       |
| 20 | 21459439  | A | G | rs112762345             | 3.51E-05 | 0.067 | 0.098 | 0.66 | 0.54 | -0.81 | 5.18E-01 | 0.070 | 0.073 | 0.95 | 0.78 | -1.17 | 0.75 | 6.47E-04 | NKX2-4(dist=81392), NKX2-2(dist=32221)         | intergenic     |
| 8  | 66481105  | A | G | rs61124236              | 5.88E-01 | 0.073 | 0.068 | 1.08 | 0.87 | -1.34 | 1.74E-05 | 0.098 | 0.072 | 1.40 | 1.17 | -1.68 | 1.30 | 6.53E-04 | LINC01299(dist=6204), ARMC1(dist=33586)        | intergenic     |
| 8  | 38880401  | T | C | rs140954145             | 7.75E-01 | 0.077 | 0.080 | 0.96 | 0.78 | -1.17 | 3.49E-06 | 0.107 | 0.070 | 1.58 | 1.32 | -1.88 | 1.30 | 6.53E-04 | ADAM9                                          | intronic       |
| 8  | 66480622  | G | A | rs35416733              | 5.88E-01 | 0.073 | 0.068 | 1.08 | 0.87 | -1.34 | 1.75E-05 | 0.098 | 0.072 | 1.40 | 1.17 | -1.68 | 1.30 | 6.54E-04 | LINC01299(dist=5721), ARMC1(dist=34069)        | intergenic     |
| 17 | 73792372  | G | T | rs8081539               | 4.64E-01 | 0.147 | 0.120 | 1.26 | 1.07 | -1.47 | 4.66E-05 | 0.201 | 0.183 | 1.12 | 0.99 | -1.28 | 1.22 | 6.56E-04 | UNK                                            | intronic       |
| 10 | 53462107  | A | G | rs78450331              | 1.45E-05 | 0.049 | 0.079 | 0.59 | 0.47 | -0.75 | 4.54E-01 | 0.055 | 0.058 | 0.94 | 0.75 | -1.18 | 0.73 | 6.56E-04 | PRKG1                                          | intronic       |
| 19 | 36652198  | T | C | rs114667815             | 5.02E-01 | 0.149 | 0.151 | 0.99 | 0.85 | -1.15 | 2.46E-05 | 0.163 | 0.126 | 1.36 | 1.18 | -1.57 | 1.26 | 6.60E-04 | COX7A1(dist=8427), ZNF565(dist=20764)          | intergenic     |
| 7  | 141243794 | G | A | rs1527641               | 3.54E-05 | 0.209 | 0.154 | 1.45 | 1.26 | -1.67 | 4.81E-01 | 0.208 | 0.209 | 0.99 | 0.87 | -1.13 | 1.20 | 6.62E-04 | TMEM178B(dist=63615), AGK(dist=7284)           | intergenic     |
| 8  | 128413510 | T | C | rs73706717              | 3.33E-01 | 0.086 | 0.096 | 0.89 | 0.73 | -1.07 | 6.47E-05 | 0.059 | 0.085 | 0.68 | 0.55 | -0.84 | 0.78 | 6.71E-04 | CCAT2                                          | ncRNA_exonic   |
| 19 | 50308893  | T | C | rs8101959               | 4.65E-01 | 0.432 | 0.420 | 1.05 | 0.94 | -1.18 | 4.47E-05 | 0.449 | 0.402 | 1.21 | 1.09 | -1.34 | 1.15 | 6.80E-04 | APP2A1                                         | intronic       |
| 17 | 73796002  | C | T | rs4789229               | 4.66E-01 | 0.147 | 0.120 | 1.26 | 1.07 | -1.47 | 4.91E-05 | 0.199 | 0.181 | 1.12 | 0.99 | -1.28 | 1.22 | 6.82E-04 | UNK                                            | intronic       |
| 1  | 1041786   | C | T | rs6604969               | 4.07E-01 | 0.448 | 0.452 | 0.99 | 0.88 | -1.1  | 5.73E-05 | 0.474 | 0.408 | 1.31 | 1.18 | -1.45 | 1.15 | 6.83E-04 | C1orf159                                       | intronic       |
| 10 | 56364579  | A | G | rs7901268               | 3.03E-06 | 0.250 | 0.311 | 1.35 | 1.2  | -1.53 | 6.31E-01 | 0.272 | 0.274 | 1.01 | 0.9  | -1.14 | 1.18 | 6.84E-04 | PCDH15                                         | intronic       |
| 1  | 1042927   | G | T | rs4970354               | 4.10E-01 | 0.447 | 0.451 | 0.99 | 0.88 | -1.1  | 5.59E-05 | 0.474 | 0.408 | 1.31 | 1.18 | -1.45 | 1.15 | 6.87E-04 | C1orf159                                       | intronic       |
| 1  | 1040985   | C | G | rs6697379               | 4.04E-01 | 0.448 | 0.451 | 0.99 | 0.88 | -1.1  | 5.92E-05 | 0.475 | 0.409 | 1.31 | 1.18 | -1.45 | 1.15 | 6.88E-04 | C1orf159                                       | intronic       |
| 1  | 1040940   | A | C | rs6702072               | 4.04E-01 | 0.448 | 0.451 | 0.99 | 0.88 | -1.1  | 5.93E-05 | 0.475 | 0.409 | 1.31 | 1.18 | -1.45 | 1.15 | 6.88E-04 | C1orf159                                       | intronic       |
| 1  | 1040472   | C | T | rs6664124               | 4.03E-01 | 0.448 | 0.452 | 0.99 | 0.88 | -1.1  | 6.00E-05 | 0.475 | 0.409 | 1.31 | 1.18 | -1.45 | 1.15 | 6.89E-04 | C1orf159                                       | intronic       |
| 8  | 117397606 | T | A | rs10107681              | 2.52E-05 | 0.459 | 0.524 | 0.77 | 0.69 | -0.86 | 5.21E-01 | 0.482 | 0.479 | 1.01 | 0.91 | -1.12 | 0.87 | 6.89E-04 | LINC00536(dist=60309), EIF3H(dist=259449)      | intergenic     |
| 21 | 34122295  | T | C | rs9981698               | 2.18E-05 | 0.119 | 0.160 | 0.71 | 0.6  | -0.83 | 5.83E-01 | 0.138 | 0.140 | 0.98 | 0.85 | -1.14 | 0.82 | 6.92E-04 | PAXBP1                                         | intronic       |
| 20 | 20912219  | T | C | rs4815007               | 4.60E-01 | 0.476 | 0.489 | 0.95 | 0.85 | -1.06 | 3.93E-05 | 0.439 | 0.488 | 0.82 | 0.74 | -0.91 | 0.87 | 6.94E-04 | RALGAPA2(dist=218953), KIZ(dist=194405)        | intergenic     |
| 7  | 79077623  | C | A | rs116622485             | 4.31E-01 | 0.072 | 0.069 | 1.05 | 0.85 | -1.3  | 2.84E-05 | 0.089 | 0.062 | 1.50 | 1.24 | -1.81 | 1.32 | 6.95E-04 | MAGI2                                          | intergenic     |
| 20 | 45480136  | C | T | rs76030878              | 4.62E-01 | 0.169 | 0.162 | 1.05 | 0.91 | -1.22 | 3.44E-05 | 0.188 | 0.152 | 1.29 | 1.12 | -1.47 | 1.22 | 6.96E-04 | SLC2A10(dist=115151), EYA2(dist=43127)         | intergenic     |
| 1  | 1043262   | T | C | rs4970356               | 4.12E-01 | 0.447 | 0.451 | 0.99 | 0.88 | -1.1  | 5.60E-05 | 0.473 | 0.407 | 1.31 | 1.18 | -1.45 | 1.15 | 6.97E-04 | C1orf159                                       | intronic       |
| 1  | 1043053   | A | G | rs4970355               | 4.12E-01 | 0.447 | 0.451 | 0.99 | 0.88 | -1.1  | 5.65E-05 | 0.473 | 0.407 | 1.31 | 1.18 | -1.45 | 1.15 | 6.99E-04 | C1orf159                                       | intronic       |
| 7  | 113530892 | C | T | rs4730602               | 9.82E-01 | 0.389 | 0.391 | 1.01 | 0.9  | -1.13 | 1.11E-06 | 0.429 | 0.366 | 0.77 | 0.69 | -0.85 | 0.87 | 6.99E-04 | PPP1R3A                                        | intronic       |
| 6  | 32524193  | C | T | rs116811823             | 2.46E-05 | 0.346 | 0.388 | 0.84 | 0.75 | -0.94 | 3.69E-01 | 0.414 | 0.421 | 0.97 | 0.88 | -1.08 | 0.84 | 7.00E-04 | HLA-DRB6                                       | ncRNA_intronic |
| 19 | 33483562  | A | G | rs7252338               | 8.15E-06 | 0.016 | 0.032 | 0.49 | 0.33 | -0.72 | 6.84E-01 | 0.021 | 0.023 | 0.91 | 0.64 | -1.3  | 0.59 | 7.01E-04 | RHPN2                                          | intronic       |
| 6  | 14764877  | C | G | rs742038                | 3.42E-07 | 0.360 | 0.405 | 0.83 | 0.74 | -0.93 | 9.52E-01 | 0.399 | 0.422 | 0.91 | 0.82 | -1.01 | 0.86 | 7.02E-04 | LINC01108(dist=479192), JARID2(dist=481329)    | intergenic     |
| 1  | 1041700   | A | G | rs6604968               | 4.07E-01 | 0.448 | 0.451 | 0.99 | 0.88 | -1.1  | 5.95E-05 | 0.474 | 0.408 | 1.31 | 1.18 | -1.45 | 1.15 | 7.03E-04 | C1orf159                                       | intronic       |
| 15 | 48774288  | A | G | rs11634866              | 2.43E-05 | 0.499 | 0.448 | 1.23 | 1.1  | -1.37 | 6.32E-01 | 0.449 | 0.437 | 1.05 | 0.95 | -1.17 | 1.14 | 7.03E-04 | FBN1                                           | intronic       |
| 1  | 1039268   | T | C | rs9329410               | 4.06E-01 | 0.448 | 0.451 | 0.99 | 0.88 | -1.1  | 6.16E-05 | 0.475 | 0.409 | 1.31 | 1.18 | -1.45 | 1.15 | 7.06E-04 | C1orf159                                       | intronic       |
| 1  | 1042673   | C | T | rs57879151              | 4.19E-01 | 0.446 | 0.450 | 0.98 | 0.88 | -1.1  | 5.14E-05 | 0.471 | 0.406 | 1.30 | 1.17 | -1.44 | 1.15 | 7.07E-04 | C1orf159                                       | intronic       |
| 8  | 38865252  | A | G | rs73674685              | 7.43E-01 | 0.077 | 0.079 | 0.97 | 0.79 | -1.19 | 5.31E-06 | 0.107 | 0.070 | 1.58 | 1.33 | -1.89 | 1.28 | 7.11E-04 | ADAM9                                          | intronic       |
| 12 | 43032357  | C | T | rs76048025              | 7.21E-01 | 0.046 | 0.047 | 0.98 | 0.75 | -1.27 | 1.20E-05 | 0.064 | 0.039 | 1.71 | 1.36 | -2.14 | 1.39 | 7.17E-04 | LOC101927058                                   | ncRNA_intronic |
| 8  | 128415459 | A | C | rs73706719              | 3.90E-01 | 0.084 | 0.093 | 0.89 | 0.74 | -1.08 | 3.85E-05 | 0.056 | 0.082 | 0.66 | 0.53 | -0.82 | 0.78 | 7.18E-04 | CASC8                                          | ncRNA_intronic |
| 6  | 31573524  | G | A | rs                      |          |       |       |      |      |       |          |       |       |      |      |       |      |          |                                                |                |

|    |           |   |   |                      |          |       |       |      |      |       |          |       |       |      |      |       |      |          |                                                   |                |
|----|-----------|---|---|----------------------|----------|-------|-------|------|------|-------|----------|-------|-------|------|------|-------|------|----------|---------------------------------------------------|----------------|
| 12 | 12256375  | G | A | rs2416991            | 9.27E-01 | 0.291 | 0.284 | 0.97 | 0.86 | -1.09 | 5.51E-06 | 0.255 | 0.317 | 1.35 | 1.2  | -1.52 | 1.17 | 7.52E-04 | BCL2L14(dist=3748), MIR1244-4(dist=8511)          | intergenic     |
| 12 | 115940482 | A | T | rs1874904            | 8.62E-01 | 0.140 | 0.123 | 1.16 | 0.99 | -1.36 | 9.94E-06 | 0.196 | 0.175 | 1.15 | 1.01 | -1.31 | 1.22 | 7.56E-04 | TBX3(dist=818513), MED13L(dist=455899)            | intergenic     |
| 19 | 36904825  | T | C | rs10414054           | 5.79E-01 | 0.256 | 0.260 | 1.02 | 0.9  | -1.16 | 3.32E-05 | 0.247 | 0.297 | 1.29 | 1.14 | -1.45 | 1.17 | 7.59E-04 | ZFP82                                             | intronic       |
| 11 | 36982781  | A | G | rs116779060          | 5.82E-01 | 0.033 | 0.033 | 0.99 | 0.73 | -1.35 | 7.02E-06 | 0.041 | 0.023 | 1.82 | 1.37 | -2.41 | 1.54 | 7.63E-04 | C11orf74(dist=301940), LOC103312105(dist=1657033) | intergenic     |
| 9  | 115861201 | T | G | rs14111604           | 3.65E-01 | 0.059 | 0.056 | 1.05 | 0.83 | -1.33 | 5.86E-05 | 0.076 | 0.056 | 1.39 | 1.13 | -1.71 | 1.43 | 7.67E-04 | ZFP37(dist=42130), FAM225B(dist=5802)             | intergenic     |
| 17 | 15854947  | A | G | rs758858             | 3.97E-01 | 0.309 | 0.334 | 1.12 | 1    | -1.26 | 2.76E-05 | 0.270 | 0.302 | 1.17 | 1.04 | -1.31 | 1.16 | 7.68E-04 | ADORA2B                                           | intronic       |
| 14 | 57291762  | G | A | rs198263             | 5.41E-05 | 0.094 | 0.059 | 1.66 | 1.35 | -2.04 | 2.92E-01 | 0.099 | 0.104 | 0.94 | 0.79 | -1.12 | 1.34 | 7.75E-04 | OTX2-AS1                                          | ncRNA_intronic |
| 2  | 18399755  | A | T | rs13385815           | 3.73E-01 | 0.068 | 0.065 | 1.06 | 0.85 | -1.31 | 2.26E-05 | 0.077 | 0.052 | 1.53 | 1.25 | -1.88 | 1.36 | 7.77E-04 | KCNS3(dist=285530), RDH14(dist=336234)            | intergenic     |
| 2  | 80296234  | T | G | rs35417553;rs6723538 | 9.01E-01 | 0.068 | 0.063 | 0.92 | 0.74 | -1.15 | 5.51E-07 | 0.082 | 0.061 | 0.73 | 0.6  | -0.89 | 0.72 | 7.78E-04 | CTNNA2                                            | intronic       |
| 12 | 12257135  | T | C | rs4763783            | 9.54E-01 | 0.288 | 0.282 | 0.97 | 0.86 | -1.09 | 5.68E-06 | 0.254 | 0.315 | 1.35 | 1.2  | -1.52 | 1.17 | 7.79E-04 | BCL2L14(dist=4508), MIR1244-4(dist=7751)          | intergenic     |
| 6  | 31515799  | G | A | rs2071591            | 4.27E-01 | 0.486 | 0.485 | 0.99 | 0.89 | -1.11 | 5.74E-05 | 0.451 | 0.512 | 1.28 | 1.15 | -1.42 | 1.14 | 7.81E-04 | NFKBIL1                                           | intronic       |
| 12 | 43015343  | G | A | rs111773852          | 6.58E-01 | 0.048 | 0.048 | 0.99 | 0.77 | -1.28 | 1.84E-05 | 0.065 | 0.039 | 1.70 | 1.36 | -2.13 | 1.38 | 7.81E-04 | LOC101927058                                      | ncRNA_intronic |
| 1  | 26485291  | T | C | rs1335762            | 5.36E-01 | 0.192 | 0.175 | 1.13 | 0.98 | -1.3  | 3.16E-05 | 0.229 | 0.198 | 1.20 | 1.06 | -1.37 | 1.20 | 7.82E-04 | FAM110D                                           | upstream       |
| 15 | 48766250  | G | C | rs56686382           | 2.10E-05 | 0.500 | 0.449 | 1.23 | 1.1  | -1.37 | 6.87E-01 | 0.452 | 0.440 | 1.05 | 0.94 | -1.16 | 1.14 | 7.83E-04 | FBN1                                              | intronic       |
| 2  | 211958795 | G | A | rs57130193           | 5.52E-01 | 0.173 | 0.173 | 1.00 | 0.86 | -1.15 | 1.14E-05 | 0.177 | 0.132 | 1.42 | 1.23 | -1.63 | 1.21 | 7.87E-04 | CPS1(dist=414963), ERBB4(dist=281647)             | intergenic     |
| 8  | 66476668  | A | G | rs181816253          | 6.82E-01 | 0.077 | 0.073 | 1.06 | 0.86 | -1.3  | 1.39E-05 | 0.104 | 0.078 | 1.39 | 1.16 | -1.65 | 1.30 | 7.95E-04 | LINC01299(dist=1767), ARMC1(dist=38023)           | intergenic     |
| 8  | 127606044 | C | G | rs12544179           | 4.22E-01 | 0.108 | 0.086 | 1.29 | 1.07 | -1.55 | 2.02E-05 | 0.164 | 0.148 | 1.13 | 0.98 | -1.3  | 1.29 | 7.96E-04 | FAM84B(dist=35333), PCAT1(dist=419355)            | intergenic     |
| 10 | 51782758  | A | G | rs4935373            | 3.76E-05 | 0.218 | 0.166 | 1.41 | 1.22 | -1.62 | 3.19E-01 | 0.214 | 0.216 | 0.99 | 0.87 | -1.12 | 1.29 | 8.02E-04 | FAM21EP                                           | ncRNA_intronic |
| 8  | 66474399  | G | A | rs7008671            | 5.79E-01 | 0.073 | 0.068 | 1.08 | 0.87 | -1.34 | 2.47E-05 | 0.096 | 0.071 | 1.40 | 1.16 | -1.68 | 1.30 | 8.08E-04 | LINC01299                                         | ncRNA_intronic |
| 1  | 147220045 | C | A | rs12032789           | 1.77E-05 | 0.078 | 0.044 | 1.83 | 1.45 | -2.3  | 4.51E-01 | 0.069 | 0.071 | 0.96 | 0.78 | -1.18 | 1.33 | 8.12E-04 | ACP6(dist=77411), GJA5(dist=8287)                 | intergenic     |
| 6  | 29441618  | C | T | rs7751705            | 5.79E-01 | 0.202 | 0.198 | 1.03 | 0.9  | -1.18 | 2.04E-05 | 0.237 | 0.182 | 1.39 | 1.23 | -1.58 | 1.19 | 8.13E-04 | OR2H1(dist=9519), MAS1L(dist=12925)               | intergenic     |
| 11 | 41217610  | G | A | rs114370510          | 2.69E-05 | 0.071 | 0.048 | 1.51 | 1.2  | -1.91 | 4.67E-01 | 0.062 | 0.054 | 1.14 | 0.92 | -1.43 | 1.35 | 8.19E-04 | LRRC4C                                            | intronic       |
| 14 | 97898039  | G | A | rs141339508          | 5.76E-01 | 0.047 | 0.045 | 1.03 | 0.79 | -1.34 | 3.32E-05 | 0.058 | 0.036 | 1.68 | 1.33 | -2.13 | 1.41 | 8.25E-04 | LINC00618(dist=486308), LOC101929241(dist=27114)  | intergenic     |
| 3  | 197673063 | C | T | rs148440303          | 5.62E-01 | 0.035 | 0.034 | 1.03 | 0.77 | -1.39 | 2.32E-05 | 0.047 | 0.029 | 1.62 | 1.25 | -2.11 | 1.54 | 8.29E-04 | IQCG                                              | intronic       |
| 8  | 66528604  | G | A | rs142339926          | 7.83E-01 | 0.073 | 0.036 | 1.07 | 0.86 | -1.32 | 5.99E-06 | 0.095 | 0.069 | 1.40 | 1.17 | -1.69 | 1.31 | 8.35E-04 | ARMC1                                             | intronic       |
| 7  | 44325363  | G | T | rs34310058           | 7.27E-01 | 0.094 | 0.084 | 1.13 | 0.94 | -1.37 | 1.36E-05 | 0.088 | 0.132 | 0.64 | 0.53 | -0.76 | 0.79 | 8.39E-04 | CAMK2B                                            | intronic       |
| 6  | 29404913  | C | T | rs141611861          | 6.73E-01 | 0.107 | 0.113 | 0.94 | 0.79 | -1.12 | 2.31E-07 | 0.149 | 0.100 | 1.57 | 1.34 | -1.83 | 1.24 | 8.45E-04 | OR11A1(dist=9404), OR10C1(dist=2803)              | intergenic     |
| 6  | 32517782  | G | C | rs74324877           | 3.65E-05 | 0.101 | 0.126 | 0.78 | 0.65 | -0.92 | 3.70E-01 | 0.125 | 0.139 | 0.89 | 0.76 | -1.04 | 0.78 | 8.49E-04 | HLA-DRB5(dist=19776), HLA-DRB6(dist=2708)         | intergenic     |
| 8  | 128413978 | T | C | rs7008058            | 3.79E-01 | 0.084 | 0.093 | 0.89 | 0.74 | -1.08 | 6.47E-05 | 0.057 | 0.083 | 0.67 | 0.54 | -0.83 | 0.78 | 8.52E-04 | CCAT2                                             | ncRNA_exonic   |
| 7  | 153925625 | A | C | rs100275866          | 6.24E-06 | 0.127 | 0.093 | 1.41 | 1.19 | -1.68 | 8.88E-01 | 0.104 | 0.101 | 1.03 | 0.87 | -1.23 | 1.27 | 8.54E-04 | DPP6                                              | intronic       |
| 6  | 31521903  | G | T | rs3094594            | 4.45E-01 | 0.487 | 0.485 | 0.99 | 0.89 | -1.11 | 6.05E-05 | 0.547 | 0.486 | 1.28 | 1.15 | -1.42 | 1.14 | 8.56E-04 | NFKBIL1                                           | intronic       |
| 4  | 77758502  | C | T | rs28571682           | 5.44E-05 | 0.094 | 0.063 | 1.53 | 1.25 | -1.88 | 4.45E-01 | 0.078 | 0.077 | 1.02 | 0.84 | -1.24 | 1.29 | 8.57E-04 | SHROOM3(dist=54097), SOWAHD(dist=57580)           | intergenic     |
| 2  | 18421964  | T | G | rs13432352           | 4.20E-01 | 0.129 | 0.126 | 1.03 | 0.87 | -1.21 | 4.24E-05 | 0.158 | 0.121 | 1.37 | 1.18 | -1.59 | 1.23 | 8.63E-04 | KCNS3(dist=307739), RDH14(dist=314025)            | intergenic     |
| 18 | 52327970  | C | G | rs75942301           | 5.89E-01 | 0.083 | 0.082 | 1.01 | 0.83 | -1.23 | 1.75E-05 | 0.092 | 0.063 | 1.52 | 1.26 | -1.83 | 1.29 | 8.68E-04 | DYNAP(dist=61246), RAB27B(dist=167738)            | intergenic     |
| 8  | 38860177  | C | A | rs61456957           | 7.96E-01 | 0.083 | 0.085 | 0.97 | 0.79 | -1.18 | 5.47E-06 | 0.112 | 0.074 | 1.57 | 1.32 | -1.86 | 1.28 | 8.71E-04 | ADAM9                                             | intronic       |
| 8  | 128425346 | T | G | rs56364999           | 4.12E-01 | 0.085 | 0.093 | 0.90 | 0.74 | -1.09 | 5.72E-05 | 0.059 | 0.086 | 0.67 | 0.54 | -0.83 | 0.79 | 8.78E-04 | CASC8                                             | ncRNA_intronic |
| 2  | 18420372  | C | A | rs13425583           | 4.25E-01 | 0.128 | 0.126 | 1.02 | 0.87 | -1.21 | 4.23E-05 | 0.158 | 0.121 | 1.37 | 1.18 | -1.59 | 1.23 | 8.81E-04 | KCNS3(dist=306147), RDH14(dist=315617)            | intergenic     |
| 17 | 33113659  | G | A | rs78223768           | 8.82E-06 | 0.051 | 0.083 | 0.59 | 0.47 | -0.74 | 9.11E-01 | 0.060 | 0.058 | 1.02 | 0.82 | -1.28 | 0.76 | 8.96E-04 | TMEM132E(dist=147317), CCT6B(dist=141219)         | intergenic     |
| 4  | 95861615  | G | A | rs6842585            | 3.89E-05 | 0.163 | 0.123 | 1.38 | 1.18 | -1.62 | 6.02E-01 | 0.132 | 0.133 | 0.99 | 0.85 | -1.16 | 1.22 | 8.99E-04 | BMPR1B                                            | intronic       |
| 20 | 58257985  | A | G | rs11166514           | 6.05E-01 | 0.135 | 0.136 | 0.99 | 0.84 | -1.16 | 5.69E-06 | 0.141 | 0.103 | 1.43 | 1.23 | -1.68 | 1.24 | 9.00E-04 | PHACTR3                                           | intronic       |
| 2  | 224823604 | C | A | rs73992134           | 5.52E-06 | 0.047 | 0.025 | 1.91 | 1.42 | -2.57 | 7.47E-01 | 0.027 | 0.027 | 1.00 | 0.72 | -1.38 | 1.53 | 9.02E-04 | MRPL44                                            | intronic       |
| 8  | 128422983 | A | G | rs60626102           | 4.03E-01 | 0.084 | 0.093 | 0.90 | 0.74 | -1.09 | 6.45E-05 | 0.059 | 0.085 | 0.67 | 0.54 | -0.83 | 0.79 | 9.03E-04 | CASC8                                             | ncRNA_intronic |
| 18 | 69145870  | A | G | rs115644503          | 6.94E-01 | 0.057 | 0.057 | 1.00 | 0.79 | -1.26 | 1.56E-05 | 0.070 | 0.047 | 1.54 | 1.24 | -1.91 | 1.39 | 9.03E-04 | GTSCR1(dist=827777), LINC01541(dist=41330)        | intergenic     |
| 8  | 127604304 | G | C | rs11776332           | 4.40E-01 | 0.108 | 0.086 | 1.29 | 1.07 | -1.55 | 2.20E-05 | 0.164 | 0.148 | 1.13 | 0.98 | -1.3  | 1.29 | 9.04E-04 | FAM84B(dist=33593), PCAT1(dist=421095)            | intergenic     |
| 20 | 55447299  | T | C | rs4811771            | 4.59E-01 | 0.452 | 0.441 | 0.96 | 0.86 | -1.07 | 4.15E-05 | 0.511 | 0.479 | 0.88 | 0.79 | -0.98 | 0.84 | 9.09E-04 | TFAP2C(dist=232961), BMP7(dist=296510)            | intergenic     |
| 1  | 158520466 | T | G | rs6697568            | 5.06E-06 | 0.384 | 0.314 | 0.74 | 0.66 | -0.82 | 8.02E-01 | 0.341 | 0.347 | 1.02 | 0.92 | -1.14 | 0.87 | 9.19E-04 | OR6Y1(dist=2571), OR6P1(dist=11975)               | intergenic     |
| 7  | 79074689  | T | C | rs7778407            | 4.47E-01 | 0.074 | 0.071 | 1.05 | 0.85 | -1.29 | 4.42E-05 | 0.092 | 0.065 | 1.47 | 1.22 | -1.77 | 1.31 | 9.27E-04 | MAGI2                                             | intronic       |
| 2  | 18416928  | C | G | rs11898461           | 4.21E-01 | 0.129 | 0.126 | 1.02 | 0.87 | -1.21 | 4.74E-05 | 0.158 | 0.121 | 1.37 | 1.18 | -1.58 | 1.23 | 9.30E-04 | KCNS3(dist=302703), RDH14(dist=319061)            | intergenic     |
| 2  | 18418256  | G | A | rs10206173           | 4.31E-01 | 0.128 | 0.126 | 1.02 | 0.87 | -1.2  | 4.67E-05 | 0.158 | 0.121 | 1.37 | 1.18 | -1.59 | 1.23 | 9.34E-04 | KCNS3(dist=304031), RDH14(dist=317733)            | intergenic     |
| 14 | 51445561  | T | C | rs73288814           | 9.61E-06 | 0.177 | 0.138 | 1.34 | 1.16 | -1.56 | 7.28E-01 | 0.141 | 0.134 | 1.06 | 0.91 | -1.24 | 1.22 | 9.34E-04 | TRIM9                                             | intronic       |
| 2  | 57698355  | T | C | rs80155642           | 5.43E-01 | 0.033 | 0.028 | 1.19 | 0.87 | -1.64 | 8.58E-06 | 0.040 | 0.026 | 1.59 | 1.2  | -2.11 | 1.54 | 9.39E-04 | CCDC85A(dist=1085046), VRK2(dist=436431)          | intergenic     |
| 7  | 157987251 | T | C | rs4416779            | 6.22E-01 | 0.265 | 0.256 | 0.96 | 0.84 | -1.08 | 1.10E-05 | 0.262 | 0.319 | 1.32 | 1.17 | -1.48 | 1.17 | 9.41E-04 | PTPRN2                                            | intronic       |
| 11 | 7855756   | C | T | rs1384510            | 6.97E-01 | 0.417 | 0.398 | 1.08 | 0.97 | -1.21 | 3.15E-07 | 0.350 | 0.426 | 0.73 | 0.65 | -0.81 | 0.87 | 9.44E-04 | OR5P3(dist=8237), OR5E1P(dist=14842)              | intergenic     |
| 5  | 13913885  | A | G | rs3213936            | 5.99E-01 | 0.480 | 0.471 | 0.97 | 0.87 | -1.08 | 2.51E-05 | 0.522 | 0.471 | 0.82 | 0.74 | -0.91 | 0.88 | 9.48E-04 | DNAH5                                             | exonic         |
| 16 | 85084266  | A | G | rs8047023            | 8.60E-01 | 0.383 | 0.372 | 0.96 | 0.86 | -1.07 | 8.72E-06 | 0.346 | 0.412 | 1.32 | 1.19 | -1.47 | 1.15 | 9.54E-04 | KIAA0513                                          | intronic       |
| 3  | 64013249  | T | C | rs35837              | 8.28E-01 | 0.259 | 0.262 | 0.99 | 0.87 | -1.12 | 9.21E-06 | 0.284 | 0.234 | 1.30 | 1.15 | -1.46 | 1.17 | 9.56E-04 | PSMD6(dist=3563), PRICKLE2-AS1(dist=40391)        | intergenic     |
| 12 | 5070721   | A | T | rs79224966           | 1.18E-05 | 0.058 | 0.030 | 1.98 | 1.51 | -2.6  | 5.85E-01 | 0.062 | 0.064 | 0.97 | 0.78 | -1.2  | 1.38 | 9.57E-04 | KCNA1(dist=43299), KCNA5(dist=82364)              | intergenic     |
| 17 |           |   |   |                      |          |       |       |      |      |       |          |       |       |      |      |       |      |          |                                                   |                |

|    |           |   |   |                       |          |       |       |      |      |       |          |       |       |      |      |       |      |          |                                                 |                |
|----|-----------|---|---|-----------------------|----------|-------|-------|------|------|-------|----------|-------|-------|------|------|-------|------|----------|-------------------------------------------------|----------------|
| 14 | 62731831  | G | C | rs11621514            | 7.23E-01 | 0.388 | 0.393 | 1.02 | 0.91 | -1.14 | 2.16E-05 | 0.409 | 0.348 | 0.77 | 0.69 | -0.86 | 0.87 | 9.83E-04 | LINC00644(dist=125140), KCNH5(dist=441460)      | intergenic     |
| 5  | 13914985  | C | G | rs13180671            | 6.55E-01 | 0.477 | 0.469 | 0.97 | 0.87 | -1.08 | 1.83E-05 | 0.521 | 0.469 | 0.81 | 0.73 | -0.9  | 0.88 | 9.83E-04 | DNAH5                                           | intronic       |
| 11 | 121364963 | A | G | rs687228              | 5.71E-05 | 0.285 | 0.334 | 0.79 | 0.71 | -0.9  | 5.77E-01 | 0.345 | 0.357 | 0.95 | 0.85 | -1.06 | 0.86 | 9.89E-04 | SORL1                                           | intronic       |
| 11 | 121365860 | A | G | rs656338              | 5.23E-05 | 0.285 | 0.334 | 0.79 | 0.7  | -0.89 | 4.46E-01 | 0.314 | 0.329 | 0.93 | 0.83 | -1.04 | 0.87 | 9.91E-04 | SORL1                                           | intronic       |
| 7  | 153933707 | C | A | rs7803409             | 7.94E-06 | 0.124 | 0.092 | 1.39 | 1.16 | -1.66 | 8.74E-01 | 0.101 | 0.098 | 1.03 | 0.87 | -1.23 | 1.29 | 1.00E-03 | DPP6                                            | intronic       |
| 10 | 83352644  | G | C | rs72816051            | 5.22E-01 | 0.112 | 0.111 | 1.01 | 0.85 | -1.2  | 2.62E-05 | 0.124 | 0.095 | 1.34 | 1.14 | -1.58 | 1.28 | 1.00E-03 | SH2D4B(dist=946328), NRG3(dist=282426)          | intergenic     |
| 5  | 13914360  | A | T | rs12654693            | 6.53E-01 | 0.477 | 0.469 | 0.97 | 0.87 | -1.08 | 1.92E-05 | 0.521 | 0.469 | 0.81 | 0.73 | -0.9  | 0.88 | 1.00E-03 | DNAH5                                           | intronic       |
| 5  | 13914193  | T | A | rs12652241            | 6.52E-01 | 0.477 | 0.469 | 0.97 | 0.87 | -1.08 | 1.93E-05 | 0.521 | 0.469 | 0.81 | 0.73 | -0.9  | 0.88 | 1.01E-03 | DNAH5                                           | intronic       |
| 7  | 141276835 | G | A | rs34428748            | 3.64E-05 | 0.209 | 0.154 | 1.45 | 1.26 | -1.67 | 5.85E-01 | 0.207 | 0.209 | 0.98 | 0.87 | -1.12 | 1.19 | 1.01E-03 | AGK                                             | intronic       |
| 2  | 224780745 | C | G | rs73994435            | 2.57E-06 | 0.049 | 0.026 | 1.90 | 1.42 | -2.56 | 7.22E-01 | 0.033 | 0.033 | 1.01 | 0.75 | -1.35 | 1.50 | 1.01E-03 | WDFY1                                           | intronic       |
| 13 | 48050278  | C | T | rs9595719             | 4.80E-05 | 0.074 | 0.113 | 0.62 | 0.51 | -0.76 | 5.22E-01 | 0.092 | 0.090 | 1.02 | 0.85 | -1.22 | 0.79 | 1.01E-03 | HTR2A(dist=579067), LINC00562(dist=454010)      | intergenic     |
| 8  | 38855782  | G | C | rs73674683            | 7.94E-01 | 0.077 | 0.080 | 0.96 | 0.78 | -1.18 | 8.16E-06 | 0.106 | 0.070 | 1.58 | 1.32 | -1.89 | 1.27 | 1.02E-03 | ADAM9                                           | intronic       |
| 4  | 77415024  | C | T | rs147671233           | 2.33E-05 | 0.016 | 0.032 | 0.49 | 0.33 | -0.72 | 7.08E-01 | 0.019 | 0.021 | 0.88 | 0.61 | -1.29 | 0.63 | 1.02E-03 | SHROOM3                                         | intronic       |
| 7  | 141306302 | A | G | rs3924731             | 3.63E-05 | 0.209 | 0.154 | 1.45 | 1.26 | -1.67 | 5.78E-01 | 0.204 | 0.207 | 0.99 | 0.87 | -1.12 | 1.19 | 1.03E-03 | AGK                                             | intronic       |
| 4  | 122554241 | A | C | rs60035947            | 9.58E-01 | 0.285 | 0.282 | 1.02 | 0.9  | -1.15 | 2.40E-06 | 0.240 | 0.296 | 0.75 | 0.67 | -0.85 | 0.86 | 1.03E-03 | QRFPR(dist=252060), ANXA5(dist=34911)           | intergenic     |
| 7  | 153910475 | G | A | rs73485487            | 1.81E-05 | 0.128 | 0.095 | 1.39 | 1.17 | -1.65 | 9.46E-01 | 0.099 | 0.096 | 1.05 | 0.88 | -1.24 | 1.26 | 1.03E-03 | DPP6                                            | intronic       |
| 14 | 77167140  | C | T | rs17104805            | 5.41E-01 | 0.125 | 0.118 | 1.07 | 0.91 | -1.27 | 5.79E-05 | 0.144 | 0.114 | 1.30 | 1.12 | -1.52 | 1.23 | 1.03E-03 | ESRRB(dist=198960), VASH1(dist=61095)           | intergenic     |
| 5  | 13915280  | G | A | rs6893653             | 6.19E-01 | 0.474 | 0.465 | 0.97 | 0.87 | -1.08 | 2.50E-05 | 0.516 | 0.466 | 0.82 | 0.74 | -0.91 | 0.88 | 1.03E-03 | DNAH5                                           | intronic       |
| 18 | 4848173   | A | G | rs6506254             | 4.78E-01 | 0.119 | 0.118 | 0.99 | 0.83 | -1.17 | 1.76E-05 | 0.136 | 0.103 | 0.72 | 0.62 | -0.85 | 0.80 | 1.03E-03 | DLGAP1(dist=392907), C18orf42(dist=295499)      | intergenic     |
| 2  | 18411082  | A | T | rs10189664            | 4.21E-01 | 0.129 | 0.126 | 1.02 | 0.87 | -1.21 | 5.68E-05 | 0.158 | 0.121 | 1.36 | 1.18 | -1.58 | 1.22 | 1.03E-03 | KCNS3(dist=296857), RDH14(dist=324907)          | intergenic     |
| 4  | 75026531  | G | A | rs148071950           | 4.17E-06 | 0.044 | 0.025 | 1.78 | 1.31 | -2.41 | 7.88E-01 | 0.023 | 0.022 | 1.02 | 0.72 | -1.45 | 1.57 | 1.03E-03 | MTHFD2L                                         | intronic       |
| 6  | 29404393  | A | G | rs11757272            | 7.02E-01 | 0.108 | 0.113 | 0.94 | 0.79 | -1.12 | 3.71E-07 | 0.145 | 0.098 | 1.57 | 1.34 | -1.83 | 1.24 | 1.04E-03 | OR11A1(dist=8884), OR10C1(dist=3323)            | intergenic     |
| 11 | 121367921 | C | T | rs668387              | 5.52E-05 | 0.284 | 0.334 | 0.79 | 0.7  | -0.89 | 4.53E-01 | 0.315 | 0.330 | 0.93 | 0.84 | -1.04 | 0.87 | 1.04E-03 | SORL1                                           | intronic       |
| 11 | 121369801 | G | T | rs633197              | 5.98E-05 | 0.286 | 0.335 | 0.80 | 0.71 | -0.9  | 4.40E-01 | 0.314 | 0.329 | 0.93 | 0.83 | -1.04 | 0.87 | 1.04E-03 | SORL1                                           | intronic       |
| 7  | 141287652 | G | A | rs4725559             | 4.01E-05 | 0.213 | 0.157 | 1.45 | 1.26 | -1.67 | 5.80E-01 | 0.206 | 0.208 | 0.99 | 0.87 | -1.12 | 1.19 | 1.04E-03 | AGK                                             | intronic       |
| 5  | 13924740  | C | T | rs2053685             | 5.83E-01 | 0.489 | 0.497 | 0.97 | 0.87 | -1.08 | 2.52E-05 | 0.445 | 0.495 | 0.82 | 0.74 | -0.91 | 0.88 | 1.05E-03 | DNAH5                                           | intronic       |
| 5  | 117735755 | C | A | rs80144360            | 5.64E-01 | 0.063 | 0.062 | 1.01 | 0.81 | -1.27 | 3.16E-05 | 0.081 | 0.054 | 1.55 | 1.27 | -1.89 | 1.34 | 1.05E-03 | LOC101927280                                    | ncRNA_intronic |
| 19 | 36866623  | G | C | rs4006082             | 9.35E-01 | 0.352 | 0.352 | 1.00 | 0.89 | -1.12 | 2.87E-06 | 0.350 | 0.404 | 1.26 | 1.13 | -1.4  | 1.16 | 1.06E-03 | ZFP14                                           | intronic       |
| 11 | 7855688   | T | C | rs1384511             | 6.75E-01 | 0.416 | 0.397 | 1.09 | 0.97 | -1.21 | 3.06E-07 | 0.350 | 0.425 | 0.73 | 0.65 | -0.81 | 0.87 | 1.06E-03 | OR5P3(dist=8169), OR5E1P(dist=14910)            | intergenic     |
| 7  | 153903800 | G | A | rs6971478             | 1.37E-05 | 0.133 | 0.100 | 1.39 | 1.17 | -1.65 | 9.92E-01 | 0.105 | 0.102 | 1.04 | 0.88 | -1.23 | 1.25 | 1.06E-03 | DPP6                                            | intronic       |
| 12 | 12260223  | A | G | rs61344881            | 8.76E-01 | 0.320 | 0.316 | 0.98 | 0.87 | -1.1  | 1.18E-05 | 0.298 | 0.353 | 1.29 | 1.15 | -1.44 | 1.17 | 1.06E-03 | BCL2L14(dist=7596), MIR1244-4(dist=4663)        | intergenic     |
| 7  | 153908196 | T | A | rs56661500            | 1.78E-05 | 0.132 | 0.100 | 1.38 | 1.16 | -1.64 | 9.39E-01 | 0.107 | 0.102 | 1.05 | 0.88 | -1.24 | 1.25 | 1.06E-03 | DPP6                                            | intronic       |
| 13 | 112325252 | G | A | rs386774869;rs1111840 | 3.87E-01 | 0.343 | 0.348 | 0.98 | 0.87 | -1.1  | 3.56E-05 | 0.352 | 0.299 | 1.27 | 1.14 | -1.42 | 1.18 | 1.07E-03 | TEX29(dist=328658), LINC00354(dist=222440)      | intergenic     |
| 10 | 57171740  | T | C | rs11818876            | 4.67E-05 | 0.058 | 0.090 | 0.63 | 0.5  | -0.78 | 3.58E-01 | 0.070 | 0.074 | 0.94 | 0.77 | -1.15 | 0.76 | 1.07E-03 | PCDH15(dist=610689), MTRNR2L5(dist=187010)      | intergenic     |
| 7  | 153912050 | C | T | rs28576062            | 9.24E-06 | 0.131 | 0.099 | 1.38 | 1.16 | -1.63 | 9.14E-01 | 0.101 | 0.098 | 1.03 | 0.87 | -1.23 | 1.27 | 1.08E-03 | DPP6                                            | intronic       |
| 5  | 13913367  | G | A | rs2896117             | 6.33E-01 | 0.481 | 0.473 | 0.97 | 0.87 | -1.08 | 2.51E-05 | 0.523 | 0.473 | 0.82 | 0.74 | -0.91 | 0.88 | 1.08E-03 | DNAH5                                           | intronic       |
| 2  | 18405733  | T | C | rs78721896            | 4.18E-01 | 0.129 | 0.126 | 1.02 | 0.87 | -1.21 | 6.35E-05 | 0.160 | 0.123 | 1.36 | 1.17 | -1.57 | 1.22 | 1.08E-03 | KCNS3(dist=291508), RDH14(dist=330256)          | intergenic     |
| 11 | 121370023 | A | G | rs596437              | 6.01E-05 | 0.286 | 0.335 | 0.80 | 0.71 | -0.9  | 4.52E-01 | 0.315 | 0.330 | 0.93 | 0.84 | -1.04 | 0.87 | 1.09E-03 | SORL1                                           | intronic       |
| 4  | 85387480  | A | G | rs1822836             | 5.85E-01 | 0.333 | 0.328 | 1.03 | 0.91 | -1.15 | 5.36E-05 | 0.356 | 0.306 | 1.25 | 1.12 | -1.4  | 1.15 | 1.09E-03 | LOC101928978(dist=167158), NKX6-1(dist=26956)   | intergenic     |
| 5  | 13913265  | A | T | rs6881752             | 6.35E-01 | 0.481 | 0.473 | 0.97 | 0.87 | -1.08 | 2.52E-05 | 0.523 | 0.473 | 0.82 | 0.74 | -0.91 | 0.88 | 1.09E-03 | DNAH5                                           | intronic       |
| 2  | 224788923 | T | C | rs73994441            | 3.28E-06 | 0.049 | 0.027 | 1.88 | 1.4  | -2.52 | 7.35E-01 | 0.033 | 0.033 | 1.01 | 0.76 | -1.35 | 1.49 | 1.10E-03 | WDFY1                                           | intronic       |
| 2  | 224791466 | C | T | rs76170429            | 3.31E-06 | 0.049 | 0.027 | 1.88 | 1.4  | -2.52 | 7.35E-01 | 0.033 | 0.033 | 1.01 | 0.75 | -1.35 | 1.49 | 1.10E-03 | WDFY1                                           | intronic       |
| 17 | 33124755  | G | C | rs148312904           | 1.26E-05 | 0.051 | 0.082 | 0.59 | 0.47 | -0.75 | 9.19E-01 | 0.058 | 0.057 | 1.02 | 0.82 | -1.28 | 0.76 | 1.11E-03 | TMEM132E(dist=158413), CCT6B(dist=130123)       | intergenic     |
| 2  | 224795310 | G | A | rs61607350            | 3.34E-06 | 0.049 | 0.027 | 1.88 | 1.4  | -2.51 | 7.35E-01 | 0.033 | 0.033 | 1.01 | 0.76 | -1.35 | 1.49 | 1.11E-03 | WDFY1                                           | intronic       |
| 12 | 43020709  | A | G | rs113689305           | 7.86E-01 | 0.047 | 0.048 | 0.97 | 0.75 | -1.26 | 1.70E-05 | 0.065 | 0.039 | 1.70 | 1.36 | -2.14 | 1.37 | 1.11E-03 | LOC101927058                                    | ncRNA_intronic |
| 10 | 51465650  | C | T | rs199898426           | 4.19E-06 | 0.238 | 0.182 | 1.40 | 1.23 | -1.6  | 6.48E-01 | 0.236 | 0.242 | 0.97 | 0.86 | -1.09 | 1.26 | 1.11E-03 | AGAP7P                                          | ncRNA_exonic   |
| 5  | 13912992  | A | T | rs13169928            | 6.38E-01 | 0.481 | 0.473 | 0.97 | 0.87 | -1.08 | 2.56E-05 | 0.523 | 0.473 | 0.82 | 0.74 | -0.91 | 0.88 | 1.11E-03 | DNAH5                                           | intronic       |
| 12 | 5072479   | G | A | rs76846413            | 1.83E-05 | 0.056 | 0.029 | 1.98 | 1.5  | -2.61 | 5.68E-01 | 0.061 | 0.063 | 0.97 | 0.78 | -1.2  | 1.38 | 1.11E-03 | KCNA1(dist=45057), KCNA5(dist=80606)            | intergenic     |
| 2  | 18404520  | C | T | rs13390392            | 4.28E-01 | 0.128 | 0.125 | 1.02 | 0.87 | -1.21 | 6.44E-05 | 0.160 | 0.123 | 1.36 | 1.17 | -1.57 | 1.22 | 1.11E-03 | KCNS3(dist=290295), RDH14(dist=331469)          | intergenic     |
| 17 | 33126878  | G | A | rs115645926           | 1.27E-05 | 0.051 | 0.082 | 0.59 | 0.47 | -0.75 | 9.21E-01 | 0.058 | 0.057 | 1.02 | 0.82 | -1.28 | 0.76 | 1.12E-03 | TMEM132E(dist=160536), CCT6B(dist=128000)       | intergenic     |
| 4  | 58636091  | A | G | rs147377103           | 9.56E-01 | 0.042 | 0.043 | 0.99 | 0.75 | -1.3  | 4.62E-06 | 0.055 | 0.030 | 1.87 | 1.46 | -2.39 | 1.38 | 1.12E-03 | LOC101928851(dist=303939), NONE(dist=NONE)      | intergenic     |
| 11 | 7856259   | T | C | rs10769838            | 6.62E-01 | 0.417 | 0.397 | 1.09 | 0.97 | -1.21 | 3.16E-07 | 0.350 | 0.426 | 0.73 | 0.65 | -0.81 | 0.87 | 1.12E-03 | OR5P3(dist=8740), OR5E1P(dist=14339)            | intergenic     |
| 2  | 196732301 | T | G | rs13028172            | 7.70E-01 | 0.184 | 0.167 | 1.13 | 0.98 | -1.31 | 2.25E-05 | 0.177 | 0.239 | 0.69 | 0.6  | -0.78 | 0.84 | 1.12E-03 | DNAH7                                           | intronic       |
| 11 | 121371120 | G | A | rs689021              | 6.28E-05 | 0.287 | 0.335 | 0.80 | 0.71 | -0.9  | 4.51E-01 | 0.314 | 0.329 | 0.93 | 0.84 | -1.04 | 0.87 | 1.12E-03 | SORL1                                           | intronic       |
| 12 | 43022641  | G | T | rs112491232           | 7.98E-01 | 0.047 | 0.048 | 0.97 | 0.75 | -1.26 | 1.67E-05 | 0.065 | 0.039 | 1.70 | 1.36 | -2.13 | 1.37 | 1.12E-03 | LOC101927058                                    | ncRNA_intronic |
| 2  | 158830826 | C | G | rs13008046            | 7.05E-01 | 0.125 | 0.123 | 1.02 | 0.86 | -1.2  | 8.80E-06 | 0.144 | 0.107 | 1.41 | 1.21 | -1.64 | 1.23 | 1.12E-03 | ACVR1(dist=98452), UPP2(dist=20865)             | intergenic     |
| 2  | 60135996  | C | G | rs1030320             | 6.70E-01 | 0.410 | 0.425 | 1.06 | 0.95 | -1.19 | 1.98E-05 | 0.368 | 0.418 | 1.23 | 1.11 | -1.37 | 1.14 | 1.13E-03 | LOC101927285(dist=629461), MIR4432(dist=478501) | intergenic     |
| 11 | 7856414   | T | C | rs10839882            | 6.68E-01 | 0.416 | 0.396 | 1.09 |      |       |          |       |       |      |      |       |      |          |                                                 |                |



|    |           |   |   |                       |          |       |       |      |      |       |           |       |       |      |      |       |      |          |                                                  |                |
|----|-----------|---|---|-----------------------|----------|-------|-------|------|------|-------|-----------|-------|-------|------|------|-------|------|----------|--------------------------------------------------|----------------|
| 6  | 167213934 | A | G | rs4710104             | 1.97E-05 | 0.087 | 0.128 | 0.65 | 0.54 | -0.78 | 6.80E-01  | 0.104 | 0.103 | 1.01 | 0.85 | -1.19 | 0.80 | 1.14E-03 | RPS6KA2                                          | intronic       |
| 10 | 32398895  | T | C | rs211424              | 7.36E-06 | 0.344 | 0.417 | 1.36 | 1.22 | -1.53 | 5.87E-01  | 0.357 | 0.356 | 1.00 | 0.89 | -1.11 | 1.15 | 1.14E-03 | KIF5B(dist=53524), EPC1(dist=157749)             | intergenic     |
| 8  | 38839492  | G | T | rs111979509           | 7.82E-01 | 0.076 | 0.079 | 0.97 | 0.79 | -1.19 | 18.94E-06 | 0.104 | 0.068 | 1.58 | 1.32 | -1.89 | 1.28 | 1.14E-03 | HTRA4                                            | intronic       |
| 5  | 13912168  | G | C | rs12657236            | 6.43E-01 | 0.481 | 0.473 | 0.97 | 0.87 | -1.08 | 2.63E-05  | 0.523 | 0.473 | 0.82 | 0.74 | -0.91 | 0.88 | 1.14E-03 | DNAH5                                            | intronic       |
| 4  | 58637102  | G | A | rs187655745           | 9.68E-01 | 0.042 | 0.043 | 0.99 | 0.75 | -1.29 | 4.61E-06  | 0.055 | 0.030 | 1.87 | 1.46 | -2.4  | 1.38 | 1.14E-03 | LOC101928851(dist=304950), NONE(dist=NONE)       | intergenic     |
| 10 | 57174013  | C | T | rs115173774           | 4.52E-05 | 0.058 | 0.090 | 0.63 | 0.5  | -0.78 | 3.76E-01  | 0.070 | 0.074 | 0.94 | 0.77 | -1.16 | 0.76 | 1.15E-03 | PCDH15(dist=612962), MTRNR2L5(dist=184737)       | intergenic     |
| 19 | 18256548  | C | T | rs73925428            | 6.36E-05 | 0.061 | 0.040 | 1.56 | 1.21 | -2    | 5.50E-01  | 0.049 | 0.042 | 1.15 | 0.9  | -1.47 | 1.37 | 1.15E-03 | MAST3                                            | intronic       |
| 4  | 18575715  | G | A | rs4235396             | 5.09E-05 | 0.525 | 0.466 | 1.26 | 1.13 | -1.41 | 5.89E-01  | 0.480 | 0.481 | 1.00 | 0.9  | -1.11 | 1.14 | 1.15E-03 | LOCORL(dist=552232), SLIT2(dist=1679472)         | intergenic     |
| 10 | 15456585  | A | G | rs61842743            | 6.25E-01 | 0.072 | 0.066 | 1.11 | 0.89 | -1.37 | 4.43E-05  | 0.087 | 0.063 | 1.41 | 1.16 | -1.71 | 1.31 | 1.15E-03 | FAM171A1(dist=43527), ITGA8(dist=99363)          | intergenic     |
| 10 | 53114079  | C | T | rs1189311             | 4.84E-05 | 0.386 | 0.337 | 0.81 | 0.72 | -0.91 | 4.04E-01  | 0.374 | 0.365 | 0.96 | 0.86 | -1.07 | 0.85 | 1.15E-03 | PRKG1                                            | intronic       |
| 12 | 5070097   | C | G | rs75872755            | 1.76E-05 | 0.056 | 0.029 | 2.00 | 1.51 | -2.64 | 5.79E-01  | 0.061 | 0.063 | 0.97 | 0.78 | -1.2  | 1.38 | 1.15E-03 | KCNA1(dist=42675), KCNA5(dist=82988)             | intergenic     |
| 6  | 29408057  | C | A | rs11755182            | 6.33E-01 | 0.104 | 0.110 | 0.93 | 0.78 | -1.12 | 4.32E-07  | 0.144 | 0.096 | 1.57 | 1.35 | -1.84 | 1.24 | 1.16E-03 | OR10C1                                           | exonic         |
| 5  | 117767075 | A | T | rs56899033            | 5.73E-01 | 0.079 | 0.079 | 1.00 | 0.82 | -1.23 | 3.16E-05  | 0.093 | 0.063 | 1.52 | 1.26 | -1.84 | 1.30 | 1.16E-03 | LOC101927280                                     | ncRNA_intronic |
| 11 | 21549057  | T | C | rs10741884            | 6.53E-01 | 0.143 | 0.131 | 1.11 | 0.95 | -1.3  | 4.23E-05  | 0.118 | 0.169 | 0.66 | 0.56 | -0.77 | 0.82 | 1.16E-03 | NELL1                                            | intronic       |
| 13 | 42988924  | A | G | rs7327510             | 5.11E-05 | 0.330 | 0.377 | 1.23 | 1.1  | -1.38 | 4.73E-01  | 0.345 | 0.362 | 1.08 | 0.97 | -1.2  | 1.15 | 1.17E-03 | AKAP11(dist=91521), TNFSF11(dist=147948)         | intergenic     |
| 5  | 13919083  | C | T | rs6893848             | 5.25E-01 | 0.493 | 0.502 | 0.96 | 0.86 | -1.08 | 4.81E-05  | 0.450 | 0.499 | 0.82 | 0.74 | -0.91 | 0.88 | 1.17E-03 | DNAH5                                            | intronic       |
| 11 | 102710257 | A | G | rs3025068             | 5.27E-01 | 0.028 | 0.026 | 1.09 | 0.77 | -1.52 | 6.23E-05  | 0.040 | 0.022 | 1.83 | 1.37 | -2.44 | 1.51 | 1.17E-03 | MMP3                                             | intronic       |
| 10 | 15457052  | T | A | rs61842745            | 6.13E-01 | 0.072 | 0.066 | 1.11 | 0.89 | -1.37 | 4.92E-05  | 0.087 | 0.063 | 1.41 | 1.16 | -1.7  | 1.31 | 1.17E-03 | FAM171A1(dist=43994), ITGA8(dist=98896)          | intergenic     |
| 8  | 127601719 | T | C | rs10956312            | 4.57E-01 | 0.107 | 0.085 | 1.29 | 1.07 | -1.55 | 3.13E-05  | 0.164 | 0.148 | 1.12 | 0.97 | -1.29 | 1.28 | 1.18E-03 | FAM84B(dist=31008), PCAT1(dist=423680)           | intergenic     |
| 8  | 38840708  | G | C | rs80147677            | 7.93E-01 | 0.076 | 0.079 | 0.96 | 0.79 | -1.18 | 9.18E-06  | 0.104 | 0.068 | 1.58 | 1.32 | -1.89 | 1.27 | 1.18E-03 | HTRA4                                            | intronic       |
| 5  | 13912798  | T | A | rs13189765            | 6.47E-01 | 0.481 | 0.473 | 0.97 | 0.87 | -1.08 | 2.69E-05  | 0.524 | 0.474 | 0.82 | 0.74 | -0.91 | 0.88 | 1.18E-03 | DNAH5                                            | intronic       |
| 4  | 122556687 | A | T | rs4473669             | 9.62E-01 | 0.282 | 0.279 | 1.01 | 0.9  | -1.15 | 2.71E-06  | 0.239 | 0.294 | 0.75 | 0.67 | -0.85 | 0.86 | 1.18E-03 | QRFPF(dist=254506), ANXA5(dist=32465)            | intergenic     |
| 4  | 99773674  | T | C | rs76766359            | 2.04E-05 | 0.181 | 0.146 | 1.30 | 1.12 | -1.5  | 8.20E-01  | 0.155 | 0.142 | 1.11 | 0.96 | -1.28 | 1.20 | 1.19E-03 | TSPAN5(dist=193862), EIF4E(dist=25933)           | intergenic     |
| 4  | 122562546 | G | C | rs1842382             | 9.79E-01 | 0.283 | 0.280 | 1.01 | 0.9  | -1.14 | 2.98E-06  | 0.239 | 0.294 | 0.75 | 0.67 | -0.85 | 0.86 | 1.19E-03 | QRFPF(dist=260365), ANXA5(dist=26606)            | intergenic     |
| 10 | 15454414  | A | T | rs4497284             | 6.37E-01 | 0.072 | 0.066 | 1.11 | 0.89 | -1.37 | 4.36E-05  | 0.087 | 0.064 | 1.41 | 1.16 | -1.7  | 1.31 | 1.19E-03 | FAM171A1(dist=41356), ITGA8(dist=101534)         | intergenic     |
| 8  | 127600712 | C | A | rs11988427            | 4.73E-01 | 0.106 | 0.085 | 1.28 | 1.06 | -1.54 | 3.05E-05  | 0.165 | 0.150 | 1.12 | 0.97 | -1.29 | 1.28 | 1.20E-03 | FAM84B(dist=30001), PCAT1(dist=424687)           | intergenic     |
| 1  | 1042378   | A | C | rs12754457            | 6.24E-01 | 0.419 | 0.425 | 0.98 | 0.87 | -1.09 | 3.59E-05  | 0.462 | 0.398 | 1.30 | 1.17 | -1.44 | 1.15 | 1.20E-03 | C1orf159                                         | intronic       |
| 2  | 224805727 | T | C | rs184109162           | 1.04E-05 | 0.046 | 0.025 | 1.88 | 1.39 | -2.55 | 8.63E-01  | 0.029 | 0.028 | 1.02 | 0.75 | -1.4  | 1.51 | 1.20E-03 | WDFY1                                            | intronic       |
| 10 | 99863569  | A | T | rs10883044            | 3.69E-05 | 0.396 | 0.341 | 1.27 | 1.14 | -1.42 | 4.59E-01  | 0.367 | 0.360 | 1.03 | 0.92 | -1.15 | 1.17 | 1.21E-03 | CRTAC1(dist=72984), R3HCC1L(dist=30812)          | intergenic     |
| 12 | 98558696  | A | C | rs12317134            | 8.26E-01 | 0.087 | 0.090 | 0.97 | 0.8  | -1.17 | 2.20E-05  | 0.117 | 0.081 | 1.51 | 1.27 | -1.79 | 1.25 | 1.22E-03 | MIR4303(dist=169470), SLC9A7P1(dist=288923)      | intergenic     |
| 17 | 80258986  | C | T | rs73368109            | 6.33E-05 | 0.047 | 0.071 | 0.65 | 0.51 | -0.82 | 4.29E-01  | 0.070 | 0.074 | 0.95 | 0.78 | -1.16 | 0.74 | 1.22E-03 | CSNK1D(dist=27392), CD7(dist=13760)              | intergenic     |
| 6  | 31768584  | T | A | rs533681143           | 5.39E-01 | 0.213 | 0.213 | 1.00 | 0.88 | -1.15 | 3.52E-05  | 0.223 | 0.185 | 1.26 | 1.11 | -1.44 | 1.21 | 1.22E-03 | LSM2                                             | intronic       |
| 5  | 13914775  | G | T | rs13180591            | 7.29E-01 | 0.477 | 0.470 | 0.98 | 0.87 | -1.09 | 1.80E-05  | 0.522 | 0.471 | 0.81 | 0.73 | -0.9  | 0.88 | 1.22E-03 | DNAH5                                            | intronic       |
| 14 | 62731060  | A | G | rs386778159;rs1160225 | 8.06E-01 | 0.388 | 0.395 | 1.03 | 0.92 | -1.15 | 2.12E-05  | 0.410 | 0.348 | 0.77 | 0.69 | -0.85 | 0.87 | 1.22E-03 | LINC00644(dist=124369), KCNH5(dist=442231)       | intergenic     |
| 4  | 99777483  | T | G | rs16996582            | 1.89E-05 | 0.180 | 0.144 | 1.30 | 1.12 | -1.51 | 8.47E-01  | 0.154 | 0.141 | 1.11 | 0.96 | -1.28 | 1.20 | 1.22E-03 | TSPAN5(dist=197671), EIF4E(dist=22124)           | intergenic     |
| 11 | 21549618  | A | G | rs10833557            | 6.67E-01 | 0.143 | 0.131 | 1.11 | 0.95 | -1.3  | 4.30E-05  | 0.118 | 0.169 | 0.66 | 0.56 | -0.77 | 0.82 | 1.22E-03 | NELL1                                            | intronic       |
| 6  | 108735625 | A | C | rs145981896           | 4.34E-01 | 0.155 | 0.171 | 0.89 | 0.77 | -1.04 | 5.23E-05  | 0.128 | 0.153 | 0.81 | 0.7  | -0.95 | 0.83 | 1.23E-03 | LACE1                                            | intronic       |
| 11 | 102705280 | A | G | rs3025087             | 5.37E-01 | 0.028 | 0.026 | 1.08 | 0.77 | -1.52 | 6.46E-05  | 0.040 | 0.022 | 1.83 | 1.37 | -2.45 | 1.50 | 1.23E-03 | WTAPP1                                           | ncRNA_intronic |
| 14 | 62731016  | C | T | rs10130513            | 8.08E-01 | 0.388 | 0.395 | 1.03 | 0.92 | -1.15 | 2.13E-05  | 0.410 | 0.348 | 0.77 | 0.69 | -0.85 | 0.87 | 1.23E-03 | LINC00644(dist=124325), KCNH5(dist=442275)       | intergenic     |
| 6  | 29405131  | A | C | rs115360560           | 6.73E-01 | 0.107 | 0.113 | 0.94 | 0.79 | -1.12 | 4.54E-07  | 0.143 | 0.096 | 1.57 | 1.34 | -1.84 | 1.24 | 1.23E-03 | OR11A1(dist=9622), OR10C1(dist=2585)             | intergenic     |
| 5  | 123804638 | C | T | rs111338396           | 6.00E-01 | 0.058 | 0.055 | 1.05 | 0.83 | -1.33 | 1.08E-05  | 0.071 | 0.049 | 1.48 | 1.2  | -1.83 | 1.39 | 1.23E-03 | LINC01170(dist=30425), ZNF608(dist=167972)       | intergenic     |
| 4  | 99775665  | A | C | rs113031663           | 2.14E-05 | 0.180 | 0.144 | 1.30 | 1.12 | -1.51 | 8.28E-01  | 0.154 | 0.141 | 1.11 | 0.96 | -1.28 | 1.20 | 1.25E-03 | TSPAN5(dist=195853), EIF4E(dist=23942)           | intergenic     |
| 1  | 67729814  | G | A | rs74082839            | 6.27E-01 | 0.151 | 0.164 | 0.91 | 0.78 | -1.06 | 2.93E-05  | 0.117 | 0.147 | 0.77 | 0.65 | -0.9  | 0.83 | 1.25E-03 | IL23R(dist=4164), IL12RB2(dist=43233)            | intergenic     |
| 2  | 224830579 | T | G | rs76359982            | 1.24E-05 | 0.047 | 0.026 | 1.81 | 1.35 | -2.44 | 8.16E-01  | 0.027 | 0.027 | 1.01 | 0.73 | -1.39 | 1.52 | 1.25E-03 | MRPL44                                           | intronic       |
| 10 | 15453795  | A | G | rs61842741            | 6.38E-01 | 0.072 | 0.066 | 1.10 | 0.89 | -1.37 | 4.72E-05  | 0.087 | 0.064 | 1.40 | 1.16 | -1.7  | 1.30 | 1.25E-03 | FAM171A1(dist=40737), ITGA8(dist=102153)         | intergenic     |
| 14 | 62723926  | T | G | rs1533354             | 8.63E-01 | 0.327 | 0.334 | 1.03 | 0.92 | -1.16 | 1.18E-05  | 0.362 | 0.305 | 0.78 | 0.7  | -0.87 | 0.87 | 1.25E-03 | LINC00644(dist=117235), KCNH5(dist=449365)       | intergenic     |
| 1  | 158521392 | G | A | rs10489835            | 6.92E-06 | 0.387 | 0.319 | 0.74 | 0.66 | -0.83 | 8.24E-01  | 0.340 | 0.346 | 1.03 | 0.92 | -1.14 | 0.87 | 1.26E-03 | OR6Y1(dist=3497), OR6P1(dist=11049)              | intergenic     |
| 11 | 102708338 | C | T | rs3025076             | 5.44E-01 | 0.028 | 0.026 | 1.08 | 0.77 | -1.52 | 6.45E-05  | 0.040 | 0.022 | 1.83 | 1.37 | -2.45 | 1.50 | 1.26E-03 | MMP3                                             | intronic       |
| 5  | 37965810  | T | G | rs13162604            | 6.57E-01 | 0.409 | 0.417 | 0.97 | 0.87 | -1.08 | 2.89E-05  | 0.368 | 0.417 | 0.81 | 0.73 | -0.91 | 0.88 | 1.26E-03 | GDNF-AS1(dist=89910), EGFLAM(dist=292701)        | intergenic     |
| 15 | 99639613  | A | G | rs1703797             | 3.85E-05 | 0.325 | 0.361 | 1.17 | 1.04 | -1.31 | 7.34E-01  | 0.393 | 0.413 | 1.09 | 0.98 | -1.21 | 1.16 | 1.26E-03 | LUNAR1(dist=65338), SYNM(dist=5673)              | intergenic     |
| 10 | 57134279  | A | G | rs79940708            | 1.45E-05 | 0.053 | 0.084 | 0.61 | 0.49 | -0.76 | 5.69E-01  | 0.065 | 0.067 | 0.97 | 0.79 | -1.2  | 0.76 | 1.26E-03 | PCDH15(dist=573228), MTRNR2L5(dist=224471)       | intergenic     |
| 2  | 57672875  | C | T | rs181300040           | 4.88E-01 | 0.048 | 0.042 | 1.15 | 0.88 | -1.49 | 3.55E-05  | 0.056 | 0.039 | 1.46 | 1.15 | -1.85 | 1.43 | 1.27E-03 | CCDC85A(dist=1059566), VRK2(dist=461911)         | intergenic     |
| 10 | 24851663  | G | A | rs1556398             | 8.09E-01 | 0.246 | 0.242 | 1.02 | 0.9  | -1.16 | 3.67E-05  | 0.213 | 0.256 | 0.79 | 0.69 | -0.89 | 0.83 | 1.27E-03 | KIAA1217(dist=14886), ARHGAP21(dist=20875)       | intergenic     |
| 8  | 127654091 | C | T | rs7461025             | 6.03E-01 | 0.241 | 0.216 | 1.15 | 1.01 | -1.31 | 2.12E-05  | 0.282 | 0.258 | 1.13 | 1.01 | -1.27 | 1.21 | 1.27E-03 | FAM84B(dist=83380), PCAT1(dist=371308)           | intergenic     |
| 11 | 7855906   | G | C | rs1384509             | 7.43E-01 | 0.427 | 0.409 | 1.08 | 0.96 | -1.2  | 6.69E-07  | 0.362 | 0.436 | 0.74 | 0.66 | -0.82 | 0.88 | 1.27E-03 | OR5P3(dist=8387), OR5E1P(dist=14692)             | intergenic     |
| 14 | 97899674  | G | A | rs78124097            | 6.65E-01 | 0.045 | 0.045 | 1.02 | 0.78 | -1.32 | 3.77E-05  | 0.057 | 0.034 | 1.69 | 1.33 | -2.15 | 1.39 | 1.27E-03 | LINC00618(dist=487943), LOC101929241(dist=25479) | intergenic     |
| 10 | 57141664  | G | A | rs16907331            | 4.33E-05 | 0.050 | 0.079 | 0.62 | 0.49 | -0.78 |           |       |       |      |      |       |      |          |                                                  |                |

|    |           |   |   |                        |          |       |       |      |      |       |          |       |       |      |      |       |      |          |                                               |                |
|----|-----------|---|---|------------------------|----------|-------|-------|------|------|-------|----------|-------|-------|------|------|-------|------|----------|-----------------------------------------------|----------------|
| 12 | 5071462   | G | A | rs56294936             | 2.74E-05 | 0.058 | 0.031 | 1.92 | 1.47 | -2.52 | 5.43E-01 | 0.066 | 0.068 | 0.97 | 0.79 | -1.2  | 1.37 | 1.30E-03 | KCNA1(dist=44040), KCNA5(dist=81623)          | intergenic     |
| 5  | 37998381  | G | C | rs10056096             | 8.46E-01 | 0.453 | 0.458 | 0.98 | 0.88 | -1.09 | 1.18E-05 | 0.404 | 0.455 | 0.81 | 0.73 | -0.9  | 0.88 | 1.31E-03 | GDNF-AS1(dist=122481), EGFLAM(dist=260130)    | intergenic     |
| 7  | 141280078 | G | C | rs35755078;rs546798954 | 5.05E-05 | 0.207 | 0.153 | 1.45 | 1.25 | -1.67 | 6.00E-01 | 0.207 | 0.209 | 0.98 | 0.87 | -1.12 | 1.19 | 1.31E-03 | AGK                                           | intronic       |
| 6  | 29407975  | C | T | rs11755177             | 6.39E-01 | 0.107 | 0.114 | 0.94 | 0.79 | -1.11 | 4.32E-07 | 0.144 | 0.096 | 1.57 | 1.35 | -1.84 | 1.23 | 1.31E-03 | OR10C1                                        | exonic         |
| 4  | 58654764  | A | G | rs73191470             | 9.55E-01 | 0.041 | 0.041 | 0.98 | 0.75 | -1.3  | 6.16E-06 | 0.054 | 0.030 | 1.86 | 1.45 | -2.38 | 1.38 | 1.31E-03 | LOC101928851(dist=322612), NONE(dist=NONE)    | intergenic     |
| 8  | 38851779  | C | T | rs73674682             | 8.46E-01 | 0.076 | 0.079 | 0.96 | 0.78 | -1.17 | 5.73E-06 | 0.109 | 0.073 | 1.55 | 1.3  | -1.84 | 1.28 | 1.31E-03 | TM2D2                                         | intronic       |
| 1  | 200498428 | C | T | rs4328101              | 8.28E-06 | 0.309 | 0.359 | 1.25 | 1.11 | -1.41 | 8.82E-01 | 0.346 | 0.348 | 1.01 | 0.91 | -1.13 | 1.16 | 1.32E-03 | ZNF281(dist=119242), KIF14(dist=22197)        | intergenic     |
| 5  | 123807510 | G | C | rs76241093             | 8.10E-01 | 0.064 | 0.064 | 1.00 | 0.8  | -1.26 | 1.40E-05 | 0.081 | 0.055 | 1.53 | 1.25 | -1.87 | 1.33 | 1.32E-03 | LINC01170(dist=33297), ZNF608(dist=165100)    | intergenic     |
| 15 | 77540272  | C | T | rs115780877            | 9.15E-01 | 0.019 | 0.021 | 0.93 | 0.63 | -1.38 | 1.27E-05 | 0.043 | 0.025 | 1.78 | 1.35 | -2.34 | 1.55 | 1.32E-03 | PEAK1                                         | intronic       |
| 4  | 14162102  | C | T | rs17346188             | 2.00E-05 | 0.062 | 0.092 | 0.66 | 0.53 | -0.81 | 7.51E-01 | 0.089 | 0.092 | 0.96 | 0.8  | -1.15 | 0.79 | 1.32E-03 | LINC01085(dist=20426), LINC00504(dist=309988) | intergenic     |
| 14 | 62726515  | G | A | rs1567953              | 8.88E-01 | 0.388 | 0.397 | 1.04 | 0.93 | -1.16 | 1.65E-05 | 0.416 | 0.353 | 0.76 | 0.69 | -0.85 | 0.88 | 1.33E-03 | LINC00644(dist=119824), KCNH5(dist=446776)    | intergenic     |
| 7  | 141280598 | G | A | rs11765211             | 5.18E-05 | 0.207 | 0.153 | 1.45 | 1.25 | -1.67 | 6.00E-01 | 0.207 | 0.209 | 0.98 | 0.87 | -1.12 | 1.19 | 1.33E-03 | AGK                                           | intronic       |
| 14 | 62730813  | T | A | rs10873147             | 8.38E-01 | 0.390 | 0.398 | 1.03 | 0.92 | -1.15 | 2.11E-05 | 0.413 | 0.350 | 0.77 | 0.69 | -0.85 | 0.88 | 1.33E-03 | LINC00644(dist=124122), KCNH5(dist=442478)    | intergenic     |
| 8  | 38842963  | C | T | rs78165883             | 8.34E-01 | 0.076 | 0.079 | 0.96 | 0.78 | -1.18 | 9.50E-06 | 0.104 | 0.069 | 1.58 | 1.32 | -1.89 | 1.27 | 1.33E-03 | HTRA4                                         | intronic       |
| 2  | 18451855  | A | T | rs1597823;rs200592303  | 5.81E-01 | 0.332 | 0.328 | 1.01 | 0.9  | -1.14 | 3.63E-05 | 0.354 | 0.297 | 1.30 | 1.16 | -1.45 | 1.15 | 1.34E-03 | KCNS3(dist=337630), RDH14(dist=284134)        | intergenic     |
| 4  | 63154579  | G | A | rs73215517             | 6.36E-05 | 0.071 | 0.046 | 1.60 | 1.26 | -2.02 | 6.57E-01 | 0.057 | 0.056 | 1.02 | 0.82 | -1.28 | 1.35 | 1.34E-03 | ADGRL3-AS1(dist=127096), TECRL(dist=1989598)  | intergenic     |
| 5  | 176148951 | C | T | rs10035599             | 4.40E-05 | 0.078 | 0.053 | 1.52 | 1.22 | -1.9  | 6.88E-01 | 0.057 | 0.054 | 1.06 | 0.84 | -1.33 | 1.33 | 1.35E-03 | TSPAN17(dist=62892), LINC01574(dist=21255)    | intergenic     |
| 7  | 38037295  | G | A | rs148298039            | 6.30E-01 | 0.370 | 0.361 | 1.04 | 0.93 | -1.17 | 1.39E-05 | 0.384 | 0.344 | 1.19 | 1.07 | -1.33 | 1.18 | 1.35E-03 | EPDR1(dist=45753), STARD3NL(dist=180513)      | intergenic     |
| 15 | 48769618  | A | T | rs16960982             | 2.36E-05 | 0.309 | 0.264 | 1.25 | 1.11 | -1.41 | 7.92E-01 | 0.283 | 0.275 | 1.04 | 0.93 | -1.17 | 1.15 | 1.35E-03 | FBN1                                          | intronic       |
| 19 | 18251750  | C | T | rs59196476             | 5.05E-05 | 0.064 | 0.043 | 1.53 | 1.2  | -1.95 | 6.18E-01 | 0.052 | 0.046 | 1.14 | 0.9  | -1.44 | 1.36 | 1.36E-03 | MAST3                                         | intronic       |
| 3  | 64048297  | T | C | rs831571               | 9.86E-01 | 0.204 | 0.207 | 1.01 | 0.89 | -1.16 | 5.43E-06 | 0.236 | 0.190 | 0.76 | 0.67 | -0.86 | 0.85 | 1.36E-03 | PSMD6(dist=38611), PRICKLE2-AS1(dist=5343)    | intergenic     |
| 8  | 66512414  | T | C | rs61316312             | 6.13E-01 | 0.073 | 0.068 | 1.08 | 0.87 | -1.34 | 4.51E-05 | 0.096 | 0.072 | 1.37 | 1.14 | -1.64 | 1.29 | 1.36E-03 | LINC01299(dist=37513), ARMC1(dist=2277)       | intergenic     |
| 8  | 124968132 | G | A | rs59703590             | 5.70E-01 | 0.176 | 0.191 | 0.91 | 0.79 | -1.04 | 4.13E-05 | 0.142 | 0.171 | 0.80 | 0.69 | -0.93 | 0.83 | 1.36E-03 | FER1L6                                        | intronic       |
| 14 | 62730168  | T | A | rs4899068              | 8.86E-01 | 0.391 | 0.399 | 1.03 | 0.92 | -1.16 | 1.80E-05 | 0.416 | 0.352 | 0.76 | 0.69 | -0.85 | 0.88 | 1.36E-03 | LINC00644(dist=123477), KCNH5(dist=443123)    | intergenic     |
| 4  | 99778952  | G | A | rs112341326            | 1.57E-05 | 0.181 | 0.145 | 1.30 | 1.13 | -1.51 | 9.20E-01 | 0.154 | 0.142 | 1.10 | 0.95 | -1.27 | 1.20 | 1.37E-03 | TSPAN5(dist=199140), EIF4E(dist=20655)        | intergenic     |
| 6  | 108699897 | A | T | rs7769482              | 5.06E-01 | 0.150 | 0.164 | 0.90 | 0.77 | -1.05 | 4.24E-05 | 0.119 | 0.144 | 0.80 | 0.69 | -0.94 | 0.83 | 1.38E-03 | LACE1                                         | intronic       |
| 5  | 89437783  | T | C | rs115825291            | 5.82E-05 | 0.044 | 0.028 | 1.62 | 1.2  | -2.17 | 5.70E-01 | 0.040 | 0.035 | 1.13 | 0.86 | -1.48 | 1.46 | 1.38E-03 | MIR3660(dist=125246), LINC01339(dist=16373)   | intergenic     |
| 20 | 57963415  | G | C | rs749389               | 2.30E-05 | 0.398 | 0.349 | 0.81 | 0.72 | -0.91 | 9.28E-01 | 0.377 | 0.370 | 0.97 | 0.87 | -1.08 | 0.85 | 1.39E-03 | EDN3(dist=62368), PHACTR3(dist=189149)        | intergenic     |
| 14 | 62732065  | C | T | rs12587137             | 8.24E-01 | 0.388 | 0.395 | 1.03 | 0.92 | -1.15 | 2.28E-05 | 0.409 | 0.347 | 0.77 | 0.69 | -0.86 | 0.87 | 1.39E-03 | LINC00644(dist=125374), KCNH5(dist=441226)    | intergenic     |
| 14 | 62727663  | G | C | rs12889289             | 8.94E-01 | 0.390 | 0.398 | 1.03 | 0.93 | -1.16 | 1.76E-05 | 0.416 | 0.353 | 0.76 | 0.69 | -0.85 | 0.88 | 1.40E-03 | LINC00644(dist=120972), KCNH5(dist=445628)    | intergenic     |
| 5  | 13914796  | T | C | rs13162553             | 7.74E-01 | 0.477 | 0.472 | 0.98 | 0.88 | -1.09 | 1.73E-05 | 0.523 | 0.471 | 0.81 | 0.73 | -0.9  | 0.88 | 1.40E-03 | DNAH5                                         | intronic       |
| 2  | 18397856  | T | A | rs149857943            | 4.70E-01 | 0.126 | 0.125 | 1.02 | 0.86 | -1.2  | 6.32E-05 | 0.156 | 0.119 | 1.36 | 1.17 | -1.58 | 1.22 | 1.40E-03 | KCNS3(dist=283631), RDH14(dist=338133)        | intergenic     |
| 8  | 38843833  | C | T | rs74560706             | 8.51E-01 | 0.076 | 0.079 | 0.96 | 0.78 | -1.17 | 9.70E-06 | 0.104 | 0.069 | 1.58 | 1.32 | -1.89 | 1.27 | 1.40E-03 | HTRA4                                         | intronic       |
| 14 | 62730442  | C | G | rs11158383             | 8.79E-01 | 0.391 | 0.400 | 1.03 | 0.92 | -1.16 | 1.96E-05 | 0.416 | 0.353 | 0.77 | 0.69 | -0.85 | 0.88 | 1.40E-03 | LINC00644(dist=123751), KCNH5(dist=442849)    | intergenic     |
| 17 | 33143329  | C | T | rs116928751            | 1.19E-05 | 0.051 | 0.083 | 0.59 | 0.47 | -0.74 | 9.98E-01 | 0.060 | 0.058 | 1.03 | 0.83 | -1.29 | 0.77 | 1.41E-03 | TMEM132E(dist=176987), CCT6B(dist=111549)     | intergenic     |
| 10 | 31864737  | C | A | rs1755172              | 1.56E-05 | 0.069 | 0.039 | 1.83 | 1.43 | -2.34 | 7.64E-01 | 0.057 | 0.060 | 0.96 | 0.77 | -1.2  | 1.45 | 1.41E-03 | ZEB1(dist=45995), ARHGAP12(dist=229589)       | intergenic     |
| 17 | 33139686  | C | T | rs116928110            | 1.50E-05 | 0.051 | 0.082 | 0.59 | 0.47 | -0.75 | 9.52E-01 | 0.059 | 0.058 | 1.03 | 0.83 | -1.28 | 0.77 | 1.42E-03 | TMEM132E(dist=173344), CCT6B(dist=115192)     | intergenic     |
| 8  | 66524904  | C | G | rs112002993            | 6.38E-01 | 0.073 | 0.068 | 1.07 | 0.87 | -1.33 | 4.04E-05 | 0.096 | 0.072 | 1.37 | 1.14 | -1.64 | 1.28 | 1.42E-03 | ARMC1                                         | intronic       |
| 4  | 58648441  | C | T | rs4865282              | 9.98E-01 | 0.041 | 0.042 | 0.98 | 0.74 | -1.29 | 5.69E-06 | 0.055 | 0.030 | 1.87 | 1.45 | -2.39 | 1.37 | 1.42E-03 | LOC101928851(dist=316289), NONE(dist=NONE)    | intergenic     |
| 15 | 48770580  | A | G | rs2413906              | 5.38E-05 | 0.496 | 0.449 | 1.21 | 1.08 | -1.35 | 6.78E-01 | 0.453 | 0.441 | 1.05 | 0.95 | -1.17 | 1.14 | 1.42E-03 | FBN1                                          | intronic       |
| 2  | 121296174 | A | G | rs386649732;rs55697601 | 3.84E-05 | 0.299 | 0.269 | 1.16 | 1.03 | -1.31 | 6.99E-01 | 0.265 | 0.246 | 1.10 | 0.98 | -1.24 | 1.18 | 1.43E-03 | LINC01101(dist=72249), GLI2(dist=258693)      | intergenic     |
| 12 | 5067742   | C | T | rs79334029             | 1.87E-05 | 0.055 | 0.028 | 2.01 | 1.52 | -2.67 | 6.23E-01 | 0.061 | 0.063 | 0.96 | 0.78 | -1.2  | 1.37 | 1.43E-03 | KCNA1(dist=40320), KCNA5(dist=85343)          | intergenic     |
| 4  | 99080700  | A | G | rs72894392             | 6.07E-05 | 0.183 | 0.233 | 0.74 | 0.65 | -0.85 | 5.82E-01 | 0.197 | 0.191 | 1.04 | 0.91 | -1.18 | 0.85 | 1.43E-03 | STPG2(dist=16309), RAP1GDS1(dist=101827)      | intergenic     |
| 5  | 13914819  | G | A | rs13180613             | 7.77E-01 | 0.477 | 0.472 | 0.98 | 0.88 | -1.09 | 1.79E-05 | 0.522 | 0.471 | 0.81 | 0.73 | -0.9  | 0.88 | 1.44E-03 | DNAH5                                         | intronic       |
| 1  | 158519525 | T | C | rs10797025             | 1.62E-06 | 0.426 | 0.353 | 0.74 | 0.66 | -0.82 | 8.72E-01 | 0.374 | 0.383 | 1.04 | 0.93 | -1.16 | 0.87 | 1.44E-03 | OR6Y1(dist=1630), OR6P1(dist=12916)           | intergenic     |
| 12 | 5068121   | G | C | rs78517372             | 2.04E-05 | 0.055 | 0.028 | 2.01 | 1.52 | -2.66 | 6.16E-01 | 0.061 | 0.063 | 0.97 | 0.78 | -1.2  | 1.37 | 1.44E-03 | KCNA1(dist=40699), KCNA5(dist=84964)          | intergenic     |
| 5  | 37984257  | C | T | rs1508841              | 7.53E-01 | 0.435 | 0.440 | 0.98 | 0.88 | -1.09 | 1.77E-05 | 0.392 | 0.440 | 0.82 | 0.74 | -0.91 | 0.88 | 1.44E-03 | GDNF-AS1(dist=108357), EGFLAM(dist=274254)    | intergenic     |
| 11 | 65405600  | G | T | rs2306363              | 7.55E-01 | 0.076 | 0.071 | 1.07 | 0.87 | -1.32 | 4.83E-05 | 0.058 | 0.091 | 0.62 | 0.5  | -0.77 | 0.77 | 1.45E-03 | SIPA1(NM_006747:c.2793G>T)                    | UTR5           |
| 5  | 13914556  | A | G | rs13179761             | 7.76E-01 | 0.477 | 0.472 | 0.98 | 0.88 | -1.09 | 1.83E-05 | 0.522 | 0.471 | 0.81 | 0.73 | -0.9  | 0.88 | 1.45E-03 | DNAH5                                         | intronic       |
| 17 | 33142821  | C | T | rs114704068            | 1.52E-05 | 0.051 | 0.082 | 0.59 | 0.47 | -0.75 | 9.58E-01 | 0.059 | 0.058 | 1.03 | 0.83 | -1.29 | 0.77 | 1.45E-03 | TMEM132E(dist=176479), CCT6B(dist=112057)     | intergenic     |
| 12 | 84762397  | A | G | rs11116342             | 4.88E-07 | 0.305 | 0.376 | 0.73 | 0.65 | -0.82 | 6.89E-01 | 0.339 | 0.329 | 1.05 | 0.94 | -1.17 | 0.87 | 1.46E-03 | TMT2C(dist=1234330), SLC6A15(dist=490870)     | intergenic     |
| 10 | 51477149  | G | A | rs111002357            | 8.17E-06 | 0.246 | 0.190 | 1.39 | 1.22 | -1.59 | 6.43E-01 | 0.237 | 0.243 | 0.97 | 0.86 | -1.1  | 1.24 | 1.46E-03 | AGAP7P                                        | ncRNA_intronic |
| 7  | 78989041  | A | G | rs372478728;rs11971813 | 6.72E-01 | 0.104 | 0.103 | 1.01 | 0.84 | -1.21 | 9.06E-06 | 0.117 | 0.084 | 1.44 | 1.22 | -1.71 | 1.26 | 1.46E-03 | MAGI2                                         | intronic       |
| 5  | 13914120  | T | C | rs10513162             | 7.74E-01 | 0.477 | 0.472 | 0.98 | 0.88 | -1.09 | 1.89E-05 | 0.522 | 0.471 | 0.81 | 0.73 | -0.9  | 0.88 | 1.47E-03 | DNAH5                                         | intronic       |
| 14 | 62728273  | T | G | rs12185062             | 8.79E-01 | 0.390 | 0.398 | 1.03 | 0.92 | -1.16 | 2.05E-05 | 0.416 | 0.353 | 0.77 | 0.69 | -0.85 | 0.88 | 1.48E-03 | LINC00644(dist=121582), KCNH5(dist=445018)    | intergenic     |
| 8  | 38860388  | C | T | rs56061814             | 9.36E-01 | 0.081 | 0.086 | 0.95 | 0.78 | -1.15 | 5.46E-06 | 0.112 | 0.074 | 1.57 | 1.32 | -1.86 | 1.26 | 1.49E-03 | ADAM9                                         | intronic       |
| 6  | 29415798  | C | T | rs5427517              |          |       |       |      |      |       |          |       |       |      |      |       |      |          |                                               |                |

|    |           |   |   |                       |          |       |       |      |      |       |          |       |       |      |      |       |      |          |                                                   |              |
|----|-----------|---|---|-----------------------|----------|-------|-------|------|------|-------|----------|-------|-------|------|------|-------|------|----------|---------------------------------------------------|--------------|
| 5  | 13915320  | T | G | rs6874270             | 7.99E-01 | 0.477 | 0.472 | 0.98 | 0.88 | -1.09 | 1.75E-05 | 0.522 | 0.471 | 0.81 | 0.73 | -0.9  | 0.88 | 1.52E-03 | DNAH5                                             | intronic     |
| 12 | 5065215   | C | G | rs78614168            | 2.22E-05 | 0.055 | 0.028 | 2.00 | 1.51 | -2.64 | 6.10E-01 | 0.059 | 0.061 | 0.97 | 0.77 | -1.2  | 1.37 | 1.52E-03 | KCNA1(dist=37793), KCNA5(dist=87870)              | intergenic   |
| 15 | 75234256  | T | C | rs111072517           | 3.42E-05 | 0.390 | 0.447 | 1.27 | 1.13 | -1.41 | 7.68E-01 | 0.428 | 0.428 | 1.00 | 0.9  | -1.11 | 1.13 | 1.52E-03 | COX5A(dist=3761), RPP25(dist=13187)               | intergenic   |
| 2  | 18477797  | C | A | rs147511530           | 4.87E-01 | 0.221 | 0.218 | 1.01 | 0.89 | -1.16 | 6.46E-05 | 0.238 | 0.198 | 1.27 | 1.12 | -1.44 | 1.21 | 1.53E-03 | KCNS3(dist=363572), RDH14(dist=258192)            | intergenic   |
| 4  | 141832180 | A | G | rs17338203            | 3.00E-06 | 0.076 | 0.113 | 0.64 | 0.53 | -0.78 | 7.16E-01 | 0.097 | 0.098 | 1.00 | 0.83 | -1.19 | 0.80 | 1.53E-03 | RNF150                                            | intronic     |
| 19 | 35719257  | G | A | rs11673347            | 3.63E-05 | 0.169 | 0.195 | 0.84 | 0.73 | -0.97 | 5.70E-01 | 0.196 | 0.221 | 0.86 | 0.76 | -0.98 | 0.85 | 1.54E-03 | FAM187B                                           | exonic       |
| 4  | 75011381  | C | G | rs149585747           | 1.07E-05 | 0.043 | 0.026 | 1.71 | 1.26 | -2.31 | 8.50E-01 | 0.023 | 0.023 | 1.04 | 0.73 | -1.46 | 1.56 | 1.54E-03 | CXCL2(dist=46384), MTHFD2L(dist=12448)            | intergenic   |
| 2  | 158824881 | C | T | rs13021866            | 7.50E-01 | 0.127 | 0.125 | 1.02 | 0.86 | -1.2  | 1.77E-05 | 0.153 | 0.115 | 1.40 | 1.2  | -1.62 | 1.21 | 1.54E-03 | ACVR1(dist=92507), UPP2(dist=26810)               | intergenic   |
| 1  | 12854930  | T | G | rs2744046             | 5.93E-01 | 0.214 | 0.203 | 1.07 | 0.93 | -1.22 | 6.12E-05 | 0.234 | 0.202 | 1.21 | 1.06 | -1.37 | 1.19 | 1.54E-03 | PRAMEF1(NM_001294139:c.-58T>G)                    | UTR5         |
| 14 | 77146785  | C | T | rs78272891            | 5.71E-01 | 0.051 | 0.045 | 1.15 | 0.89 | -1.48 | 6.35E-05 | 0.058 | 0.040 | 1.47 | 1.17 | -1.86 | 1.38 | 1.54E-03 | ESRRB(dist=178605), VASH1(dist=81450)             | intergenic   |
| 4  | 40086752  | T | C | rs28519512            | 2.86E-05 | 0.490 | 0.435 | 0.80 | 0.72 | -0.89 | 7.93E-01 | 0.443 | 0.437 | 0.98 | 0.88 | -1.08 | 0.88 | 1.55E-03 | N4BP2                                             | intronic     |
| 4  | 99099811  | G | A | rs72896117            | 5.74E-05 | 0.184 | 0.234 | 0.74 | 0.65 | -0.85 | 6.15E-01 | 0.200 | 0.193 | 1.04 | 0.91 | -1.19 | 0.85 | 1.55E-03 | STPG2(dist=35420), RAP1GDS1(dist=82716)           | intergenic   |
| 5  | 37972586  | C | T | rs6451352             | 8.79E-01 | 0.419 | 0.421 | 0.99 | 0.89 | -1.1  | 1.17E-05 | 0.374 | 0.425 | 0.81 | 0.72 | -0.9  | 0.88 | 1.56E-03 | GDNF-AS1(dist=96686), EGFLAM(dist=285925)         | intergenic   |
| 15 | 99638836  | A | C | rs1670268             | 5.62E-05 | 0.323 | 0.356 | 1.16 | 1.03 | -1.3  | 7.16E-01 | 0.389 | 0.409 | 1.09 | 0.98 | -1.21 | 1.15 | 1.56E-03 | LUNAR1(dist=64561), SYNM(dist=6450)               | intergenic   |
| 1  | 200498000 | T | C | rs10919963            | 1.11E-05 | 0.304 | 0.357 | 1.27 | 1.13 | -1.43 | 9.71E-01 | 0.343 | 0.344 | 1.00 | 0.9  | -1.12 | 1.15 | 1.56E-03 | ZNF281(dist=118814), KIF14(dist=22625)            | intergenic   |
| 10 | 98575659  | G | T | rs111209823           | 5.43E-06 | 0.465 | 0.434 | 1.14 | 1.02 | -1.27 | 8.22E-01 | 0.403 | 0.392 | 1.05 | 0.94 | -1.16 | 1.20 | 1.57E-03 | PIK3AP1(dist=95380), MIR607(dist=12767)           | intergenic   |
| 2  | 158829532 | G | A | rs71421063            | 7.29E-01 | 0.127 | 0.125 | 1.02 | 0.86 | -1.2  | 2.03E-05 | 0.152 | 0.114 | 1.39 | 1.2  | -1.62 | 1.22 | 1.57E-03 | ACVR1(dist=97158), UPP2(dist=22159)               | intergenic   |
| 8  | 38846996  | T | C | rs80055284            | 8.85E-01 | 0.076 | 0.079 | 0.95 | 0.78 | -1.17 | 1.03E-05 | 0.104 | 0.069 | 1.58 | 1.32 | -1.89 | 1.26 | 1.57E-03 | TM2D2                                             | UTR3         |
| 2  | 158825666 | C | T | rs57670760            | 7.50E-01 | 0.126 | 0.125 | 1.01 | 0.86 | -1.2  | 1.84E-05 | 0.153 | 0.114 | 1.40 | 1.2  | -1.62 | 1.22 | 1.58E-03 | ACVR1(dist=93292), UPP2(dist=26025)               | intergenic   |
| 2  | 158823350 | G | A | rs34991333            | 7.54E-01 | 0.126 | 0.124 | 1.01 | 0.86 | -1.2  | 1.83E-05 | 0.153 | 0.114 | 1.40 | 1.21 | -1.63 | 1.21 | 1.58E-03 | ACVR1(dist=90976), UPP2(dist=28341)               | intergenic   |
| 4  | 141830107 | T | C | rs62345034            | 1.59E-06 | 0.078 | 0.116 | 0.64 | 0.53 | -0.78 | 7.19E-01 | 0.100 | 0.100 | 1.00 | 0.84 | -1.19 | 0.81 | 1.58E-03 | RNF150                                            | intronic     |
| 11 | 36917563  | T | A | rs73452352            | 5.33E-01 | 0.059 | 0.059 | 1.00 | 0.79 | -1.26 | 5.96E-05 | 0.069 | 0.045 | 1.58 | 1.27 | -1.96 | 1.34 | 1.58E-03 | C11orf74(dist=236722), LOC103312105(dist=1722251) | intergenic   |
| 10 | 49944268  | T | G | rs41282001            | 2.60E-05 | 0.042 | 0.023 | 1.87 | 1.36 | -2.57 | 4.16E-01 | 0.038 | 0.037 | 1.02 | 0.78 | -1.35 | 1.62 | 1.58E-03 | WDFY4                                             | intronic     |
| 11 | 21554942  | T | C | rs10833559            | 7.29E-01 | 0.142 | 0.129 | 1.12 | 0.95 | -1.31 | 4.74E-05 | 0.117 | 0.168 | 0.66 | 0.56 | -0.77 | 0.83 | 1.59E-03 | NELL1                                             | intronic     |
| 15 | 96140894  | T | C | rs79829742            | 3.06E-05 | 0.054 | 0.084 | 0.63 | 0.5  | -0.78 | 9.14E-01 | 0.066 | 0.064 | 1.03 | 0.84 | -1.28 | 0.76 | 1.60E-03 | LINC00924(dist=89818), NR2F2-AS1(dist=529695)     | intergenic   |
| 10 | 83332405  | C | T | rs114175533           | 4.89E-01 | 0.079 | 0.078 | 1.01 | 0.82 | -1.23 | 5.57E-05 | 0.088 | 0.063 | 1.42 | 1.17 | -1.72 | 1.32 | 1.60E-03 | SH2D4B(dist=926089), NRG3(dist=302665)            | intergenic   |
| 11 | 18180484  | C | T | rs12278693            | 8.61E-01 | 0.034 | 0.035 | 0.98 | 0.73 | -1.33 | 1.00E-05 | 0.048 | 0.028 | 1.72 | 1.32 | -2.23 | 1.48 | 1.61E-03 | MRGPRX3(dist=20457), MRGPRX4(dist=13900)          | intergenic   |
| 13 | 48802389  | C | G | rs74975473            | 8.79E-01 | 0.063 | 0.064 | 0.98 | 0.78 | -1.23 | 7.81E-06 | 0.077 | 0.048 | 1.67 | 1.35 | -2.05 | 1.32 | 1.61E-03 | MED4(dist=133112), ITM2B(dist=4885)               | intergenic   |
| 13 | 38052252  | A | G | rs9547902             | 6.49E-01 | 0.295 | 0.288 | 0.97 | 0.86 | -1.09 | 5.96E-05 | 0.272 | 0.326 | 1.29 | 1.15 | -1.45 | 1.16 | 1.61E-03 | CSNK1A1L(dist=372451), LINC01048(dist=3349)       | intergenic   |
| 4  | 58639261  | A | C | rs1509537             | 9.20E-01 | 0.044 | 0.045 | 0.98 | 0.75 | -1.27 | 4.92E-06 | 0.055 | 0.030 | 1.88 | 1.46 | -2.4  | 1.37 | 1.63E-03 | LOC101928851(dist=307109), NONE(dist=NONE)        | intergenic   |
| 10 | 87495555  | G | A | rs60829940            | 2.01E-05 | 0.072 | 0.102 | 0.69 | 0.56 | -0.84 | 5.00E-01 | 0.089 | 0.095 | 0.93 | 0.78 | -1.12 | 0.80 | 1.64E-03 | GRID1                                             | intronic     |
| 2  | 96787402  | C | T | rs19293354            | 8.84E-01 | 0.035 | 0.035 | 1.01 | 0.75 | -1.35 | 6.08E-07 | 0.043 | 0.026 | 1.67 | 1.27 | -2.2  | 1.59 | 1.65E-03 | ADRA2B                                            | upstream     |
| 1  | 90077905  | G | T | rs1215534             | 4.77E-05 | 0.525 | 0.454 | 0.75 | 0.67 | -0.84 | 6.06E-01 | 0.498 | 0.489 | 1.04 | 0.93 | -1.15 | 0.88 | 1.66E-03 | LRRRC8(dist=14485), FLJ27354(dist=12503)          | intergenic   |
| 14 | 62730856  | G | A | rs10151292            | 8.70E-01 | 0.391 | 0.399 | 1.03 | 0.92 | -1.16 | 2.67E-05 | 0.421 | 0.360 | 0.77 | 0.7  | -0.86 | 0.88 | 1.69E-03 | LINC00644(dist=124165), KCNH5(dist=442435)        | intergenic   |
| 17 | 33153010  | G | A | rs118008163           | 1.65E-05 | 0.051 | 0.082 | 0.60 | 0.47 | -0.75 | 9.95E-01 | 0.059 | 0.058 | 1.04 | 0.83 | -1.29 | 0.77 | 1.69E-03 | TMEM132E(dist=186668), CCT6B(dist=101868)         | intergenic   |
| 2  | 18416404  | G | A | rs11886016            | 5.99E-01 | 0.133 | 0.133 | 1.00 | 0.85 | -1.17 | 3.88E-05 | 0.162 | 0.124 | 1.37 | 1.18 | -1.58 | 1.21 | 1.72E-03 | KCNS3(dist=302179), RDH14(dist=319585)            | intergenic   |
| 4  | 36698553  | T | C | rs12504657            | 9.22E-01 | 0.035 | 0.031 | 1.15 | 0.84 | -1.55 | 3.54E-05 | 0.061 | 0.047 | 1.30 | 1.04 | -1.63 | 1.40 | 1.73E-03 | MIR1255B1(dist=270503), MIR4801(dist=544979)      | intergenic   |
| 2  | 26952998  | T | C | rs11126678            | 8.67E-06 | 0.082 | 0.113 | 0.70 | 0.58 | -0.85 | 8.31E-01 | 0.105 | 0.112 | 0.93 | 0.79 | -1.1  | 0.81 | 1.73E-03 | KCNK3(NM_002246:c.*1562T>C)                       | UTR3         |
| 6  | 29415862  | C | T | rs6911542             | 6.65E-01 | 0.103 | 0.109 | 0.94 | 0.79 | -1.12 | 8.63E-07 | 0.137 | 0.093 | 1.55 | 1.33 | -1.82 | 1.24 | 1.74E-03 | OR10C1(dist=7108), OR2H1(dist=10368)              | intergenic   |
| 5  | 37972576  | G | A | rs2136192             | 9.27E-01 | 0.406 | 0.406 | 1.00 | 0.89 | -1.12 | 8.76E-06 | 0.359 | 0.412 | 0.80 | 0.72 | -0.89 | 0.88 | 1.74E-03 | GDNF-AS1(dist=96676), EGFLAM(dist=285935)         | intergenic   |
| 5  | 92097627  | G | C | rs142040766           | 5.86E-01 | 0.035 | 0.035 | 1.00 | 0.74 | -1.34 | 2.09E-05 | 0.041 | 0.024 | 1.78 | 1.34 | -2.36 | 1.50 | 1.75E-03 | ARRDC3-AS1(dist=1381095), NR2F1-AS1(dist=647435)  | intergenic   |
| 11 | 7858223   | G | A | rs10839885            | 5.13E-01 | 0.407 | 0.384 | 1.10 | 0.99 | -1.23 | 2.77E-07 | 0.345 | 0.421 | 0.72 | 0.65 | -0.81 | 0.88 | 1.76E-03 | OR5P3(dist=10704), OR5E1P(dist=12375)             | intergenic   |
| 12 | 114982606 | A | C | rs386766547;rs2252912 | 8.75E-01 | 0.386 | 0.380 | 1.02 | 0.91 | -1.15 | 5.20E-06 | 0.346 | 0.403 | 0.78 | 0.7  | -0.87 | 0.86 | 1.76E-03 | TBX5-AS1(dist=131969), TBX3(dist=125453)          | intergenic   |
| 18 | 4848074   | C | G | rs113055418           | 5.08E-01 | 0.110 | 0.110 | 1.00 | 0.84 | -1.19 | 3.67E-05 | 0.124 | 0.093 | 1.38 | 1.18 | -1.63 | 1.25 | 1.77E-03 | DLGAP1(dist=392808), C18orf42(dist=295598)        | intergenic   |
| 5  | 13915670  | T | C | rs1445822             | 7.52E-01 | 0.471 | 0.465 | 0.97 | 0.87 | -1.09 | 3.04E-05 | 0.515 | 0.465 | 0.82 | 0.74 | -0.91 | 0.88 | 1.77E-03 | DNAH5                                             | intronic     |
| 5  | 13915441  | T | C | rs6874452             | 7.51E-01 | 0.471 | 0.465 | 0.97 | 0.87 | -1.09 | 3.06E-05 | 0.515 | 0.465 | 0.82 | 0.74 | -0.91 | 0.88 | 1.78E-03 | DNAH5                                             | intronic     |
| 6  | 29414831  | T | G | rs16894930            | 5.92E-01 | 0.107 | 0.114 | 0.93 | 0.78 | -1.11 | 6.41E-07 | 0.145 | 0.098 | 1.56 | 1.33 | -1.82 | 1.23 | 1.78E-03 | OR10C1(dist=6077), OR2H1(dist=11399)              | intergenic   |
| 16 | 83939507  | C | T | rs28670300            | 4.62E-01 | 0.051 | 0.049 | 1.06 | 0.82 | -1.36 | 2.24E-05 | 0.044 | 0.028 | 1.62 | 1.24 | -2.12 | 1.50 | 1.78E-03 | MLYCD                                             | intronic     |
| 8  | 38834697  | C | T | rs111657881           | 7.69E-01 | 0.075 | 0.077 | 0.97 | 0.79 | -1.19 | 2.13E-05 | 0.101 | 0.067 | 1.55 | 1.3  | -1.86 | 1.27 | 1.78E-03 | HTRA4                                             | intronic     |
| 10 | 24586846  | C | T | rs74122217            | 5.27E-05 | 0.092 | 0.132 | 0.67 | 0.56 | -0.8  | 6.09E-01 | 0.094 | 0.093 | 1.01 | 0.85 | -1.21 | 0.79 | 1.79E-03 | KIAA1217                                          | intronic     |
| 11 | 7852124   | C | T | rs10839884            | 5.08E-01 | 0.406 | 0.382 | 1.10 | 0.99 | -1.24 | 3.10E-07 | 0.341 | 0.417 | 0.72 | 0.65 | -0.81 | 0.88 | 1.80E-03 | OR5P3(dist=10695), OR5E1P(dist=12384)             | intergenic   |
| 10 | 63590396  | T | C | rs2675645             | 4.42E-05 | 0.449 | 0.381 | 1.33 | 1.19 | -1.48 | 4.69E-01 | 0.443 | 0.440 | 1.01 | 0.91 | -1.12 | 1.14 | 1.80E-03 | C10orf107(dist=64305), ARID5B(dist=70617)         | intergenic   |
| 2  | 158810666 | C | T | rs13010049            | 7.43E-01 | 0.117 | 0.115 | 1.02 | 0.86 | -1.21 | 2.49E-05 | 0.142 | 0.106 | 1.39 | 1.2  | -1.63 | 1.22 | 1.80E-03 | ACVR1(dist=78292), UPP2(dist=41025)               | intergenic   |
| 18 | 72905053  | T | C | rs115979417           | 2.85E-05 | 0.061 | 0.039 | 1.59 | 1.24 | -2.05 | 9.53E-01 | 0.034 | 0.033 | 1.03 | 0.77 | -1.37 | 1.39 | 1.81E-03 | ZNF407(dist=127425), ZADH2(dist=42225)            | intergenic   |
| 5  | 13912680  | G | C | rs13169839            | 7.47E-01 | 0.486 | 0.481 | 0.98 | 0.88 | -1.09 | 3.22E-05 | 0.529 | 0.479 | 0.82 | 0.74 | -0.91 | 0.88 | 1.81E-03 | DNAH5                                             | intronic     |
| 6  | 32459572  | T | C | rs74345507            | 3.62E-05 | 0.103 | 0.127 | 0.78 | 0.66 | -0.93 | 4.79E-01 | 0.129 | 0.139 | 0.91 | 0.78 | -1.06 | 0.78 | 1.82E-03 | HLA-DRA(dist=46746), HLA-DRB5(dist=25582)         | intergenic</ |

|    |           |   |   |             |          |       |       |      |      |       |          |       |       |      |      |       |      |          |                                                   |                |
|----|-----------|---|---|-------------|----------|-------|-------|------|------|-------|----------|-------|-------|------|------|-------|------|----------|---------------------------------------------------|----------------|
| 4  | 189436696 | C | A | rs73875226  | 7.29E-06 | 0.057 | 0.035 | 1.70 | 1.3  | -2.21 | 7.28E-01 | 0.036 | 0.035 | 1.03 | 0.77 | -1.36 | 1.40 | 1.85E-03 | LINC01060                                         | ncRNA_intronic |
| 14 | 51441528  | G | A | rs73288810  | 2.66E-05 | 0.171 | 0.133 | 1.35 | 1.16 | -1.57 | 8.55E-01 | 0.136 | 0.130 | 1.05 | 0.9  | -1.22 | 1.21 | 1.86E-03 | TRIM9                                             | downstream     |
| 12 | 5063504   | G | A | rs76364502  | 1.71E-05 | 0.055 | 0.028 | 2.00 | 1.51 | -2.66 | 6.99E-01 | 0.058 | 0.060 | 0.96 | 0.76 | -1.19 | 1.36 | 1.87E-03 | KCNA1(dist=36082), KCNA5(dist=89581)              | intergenic     |
| 12 | 5068232   | G | A | rs79431781  | 3.04E-05 | 0.056 | 0.029 | 1.95 | 1.48 | -2.57 | 6.15E-01 | 0.061 | 0.063 | 0.97 | 0.78 | -1.2  | 1.36 | 1.87E-03 | KCNA1(dist=40810), KCNA5(dist=84853)              | intergenic     |
| 8  | 38835465  | C | T | rs55736573  | 7.89E-01 | 0.074 | 0.077 | 0.97 | 0.79 | -1.19 | 2.10E-05 | 0.101 | 0.067 | 1.55 | 1.3  | -1.86 | 1.27 | 1.88E-03 | HTRA4                                             | intronic       |
| 18 | 72897271  | C | T | rs146531426 | 3.13E-05 | 0.060 | 0.039 | 1.59 | 1.24 | -2.05 | 9.47E-01 | 0.035 | 0.034 | 1.03 | 0.77 | -1.37 | 1.39 | 1.89E-03 | ZNF407(dist=119643), ZADH2(dist=12007)            | intergenic     |
| 10 | 15455419  | A | C | rs61842742  | 8.36E-01 | 0.076 | 0.072 | 1.07 | 0.87 | -1.31 | 3.41E-05 | 0.091 | 0.067 | 1.40 | 1.16 | -1.68 | 1.29 | 1.90E-03 | FAM171A1(dist=42361), ITGA8(dist=100529)          | intergenic     |
| 6  | 32552746  | A | G | rs189591509 | 5.60E-05 | 0.075 | 0.095 | 0.77 | 0.63 | -0.94 | 5.49E-01 | 0.088 | 0.092 | 0.95 | 0.79 | -1.14 | 0.74 | 1.90E-03 | HLA-DRB1                                          | intronic       |
| 15 | 48774327  | A | T | rs16960997  | 3.74E-05 | 0.315 | 0.269 | 1.25 | 1.11 | -1.41 | 8.24E-01 | 0.286 | 0.278 | 1.04 | 0.92 | -1.16 | 1.15 | 1.91E-03 | FBN1                                              | intronic       |
| 6  | 29413861  | A | T | rs116678588 | 6.01E-01 | 0.107 | 0.114 | 0.93 | 0.78 | -1.11 | 7.79E-07 | 0.144 | 0.098 | 1.56 | 1.33 | -1.82 | 1.22 | 1.92E-03 | OR10C1(dist=5107), OR2H1(dist=12369)              | intergenic     |
| 18 | 72912486  | A | G | rs74389878  | 2.64E-05 | 0.060 | 0.039 | 1.58 | 1.22 | -2.03 | 9.32E-01 | 0.034 | 0.033 | 1.03 | 0.77 | -1.37 | 1.40 | 1.93E-03 | ZADH2(NM_175907:c.*885T>C)                        | UTR3           |
| 12 | 54105074  | T | C | rs3741662   | 8.15E-06 | 0.172 | 0.227 | 0.71 | 0.62 | -0.81 | 9.31E-01 | 0.200 | 0.188 | 1.08 | 0.95 | -1.23 | 0.84 | 1.93E-03 | CALCOCO1                                          | UTR3           |
| 6  | 29411974  | C | G | rs6930431   | 6.04E-01 | 0.107 | 0.114 | 0.93 | 0.78 | -1.11 | 8.10E-07 | 0.144 | 0.097 | 1.56 | 1.33 | -1.82 | 1.22 | 1.93E-03 | OR10C1(dist=3220), OR2H1(dist=14256)              | intergenic     |
| 6  | 29413779  | T | G | rs16894923  | 6.01E-01 | 0.107 | 0.114 | 0.93 | 0.78 | -1.11 | 7.93E-07 | 0.144 | 0.098 | 1.55 | 1.33 | -1.82 | 1.22 | 1.93E-03 | OR10C1(dist=5025), OR2H1(dist=12451)              | intergenic     |
| 7  | 143205171 | T | C | rs10237688  | 1.76E-05 | 0.130 | 0.103 | 0.72 | 0.61 | -0.84 | 9.49E-01 | 0.143 | 0.141 | 1.01 | 0.87 | -1.18 | 0.83 | 1.93E-03 | EPHA1-AS1                                         | ncRNA_intronic |
| 11 | 7855047   | C | T | rs2048430   | 4.82E-01 | 0.432 | 0.408 | 1.10 | 0.98 | -1.23 | 3.50E-07 | 0.362 | 0.437 | 0.73 | 0.66 | -0.81 | 0.88 | 1.93E-03 | OR5P3(dist=7528), OR5E1P(dist=15551)              | intergenic     |
| 6  | 29413534  | A | G | rs58774316  | 6.01E-01 | 0.107 | 0.114 | 0.93 | 0.78 | -1.11 | 8.01E-07 | 0.144 | 0.097 | 1.55 | 1.33 | -1.82 | 1.22 | 1.94E-03 | OR10C1(dist=4780), OR2H1(dist=12696)              | intergenic     |
| 6  | 29413527  | G | T | rs58855769  | 6.01E-01 | 0.107 | 0.114 | 0.93 | 0.78 | -1.11 | 8.02E-07 | 0.144 | 0.097 | 1.55 | 1.33 | -1.82 | 1.22 | 1.94E-03 | OR10C1(dist=4773), OR2H1(dist=12703)              | intergenic     |
| 17 | 33110481  | G | A | rs111515563 | 2.42E-05 | 0.050 | 0.080 | 0.60 | 0.47 | -0.76 | 9.77E-01 | 0.058 | 0.056 | 1.03 | 0.82 | -1.29 | 0.77 | 1.94E-03 | TMEM132E(dist=144139), CCT6B(dist=144397)         | intergenic     |
| 12 | 5063188   | G | T | rs974447    | 1.74E-05 | 0.055 | 0.028 | 2.00 | 1.51 | -2.65 | 7.07E-01 | 0.057 | 0.060 | 0.95 | 0.76 | -1.19 | 1.36 | 1.94E-03 | KCNA1(dist=35766), KCNA5(dist=89897)              | intergenic     |
| 2  | 158823492 | C | T | rs35653834  | 8.08E-01 | 0.131 | 0.130 | 1.01 | 0.86 | -1.19 | 2.01E-05 | 0.159 | 0.121 | 1.38 | 1.19 | -1.59 | 1.21 | 1.95E-03 | ACVR1(dist=91118), UPP2(dist=28199)               | intergenic     |
| 2  | 60140608  | C | T | rs1559621   | 8.17E-01 | 0.407 | 0.419 | 1.05 | 0.94 | -1.18 | 2.28E-05 | 0.368 | 0.417 | 1.23 | 1.1  | -1.37 | 1.14 | 1.95E-03 | LOC101927285(dist=634073), MIR4432(dist=473889)   | intergenic     |
| 8  | 38848808  | C | T | rs58771784  | 9.72E-01 | 0.077 | 0.081 | 0.94 | 0.77 | -1.15 | 1.05E-05 | 0.104 | 0.069 | 1.58 | 1.32 | -1.89 | 1.26 | 1.97E-03 | TM2D2                                             | UTR3           |
| 15 | 77520611  | C | T | rs115757025 | 6.97E-01 | 0.018 | 0.021 | 0.89 | 0.6  | -1.33 | 8.25E-06 | 0.042 | 0.023 | 1.83 | 1.38 | -2.42 | 1.53 | 1.98E-03 | PEAK1                                             | intronic       |
| 1  | 90076645  | T | G | rs1215537   | 3.77E-05 | 0.518 | 0.447 | 0.75 | 0.67 | -0.84 | 6.98E-01 | 0.504 | 0.493 | 1.04 | 0.94 | -1.16 | 0.88 | 1.98E-03 | LRRC8B(dist=13225), FLJ27354(dist=13763)          | intergenic     |
| 2  | 224825748 | A | G | rs73992135  | 1.47E-05 | 0.046 | 0.026 | 1.81 | 1.34 | -2.43 | 7.33E-01 | 0.028 | 0.028 | 1.00 | 0.73 | -1.37 | 1.49 | 1.99E-03 | MRPL44                                            | intronic       |
| 1  | 90075618  | C | G | rs1215539   | 3.76E-05 | 0.518 | 0.447 | 0.75 | 0.67 | -0.84 | 7.01E-01 | 0.504 | 0.494 | 1.04 | 0.94 | -1.16 | 0.88 | 2.00E-03 | LRRC8B(dist=12198), FLJ27354(dist=14790)          | intergenic     |
| 17 | 33289860  | C | T | rs7582391   | 2.48E-05 | 0.051 | 0.083 | 0.60 | 0.48 | -0.75 | 9.44E-01 | 0.061 | 0.059 | 1.03 | 0.83 | -1.28 | 0.78 | 2.00E-03 | ZNF830(NM_052857:c.*156T>C)                       | UTR3           |
| 15 | 48780089  | A | C | rs7176364   | 4.90E-05 | 0.319 | 0.273 | 1.24 | 1.1  | -1.4  | 8.28E-01 | 0.282 | 0.274 | 1.04 | 0.93 | -1.17 | 1.15 | 2.03E-03 | FBN1                                              | intronic       |
| 10 | 97355065  | A | C | rs7914886   | 1.60E-05 | 0.203 | 0.165 | 1.29 | 1.12 | -1.49 | 6.78E-01 | 0.171 | 0.162 | 1.06 | 0.93 | -1.22 | 1.19 | 2.03E-03 | SORBS1(dist=33888), ALDH18A1(dist=10621)          | intergenic     |
| 12 | 5062786   | G | A | rs77487155  | 1.91E-05 | 0.055 | 0.028 | 1.98 | 1.5  | -2.63 | 7.05E-01 | 0.057 | 0.060 | 0.96 | 0.76 | -1.19 | 1.37 | 2.04E-03 | KCNA1(dist=35364), KCNA5(dist=90299)              | intergenic     |
| 3  | 64021693  | A | C | rs831556    | 7.53E-01 | 0.209 | 0.213 | 1.03 | 0.9  | -1.18 | 3.01E-06 | 0.242 | 0.194 | 0.76 | 0.67 | -0.86 | 0.86 | 2.05E-03 | PSMD6(dist=12007), PRICKLE2-AS1(dist=31947)       | intergenic     |
| 10 | 97354795  | C | T | rs7914594   | 1.62E-05 | 0.203 | 0.165 | 1.29 | 1.12 | -1.49 | 6.79E-01 | 0.171 | 0.162 | 1.06 | 0.93 | -1.22 | 1.19 | 2.05E-03 | SORBS1(dist=33618), ALDH18A1(dist=10891)          | intergenic     |
| 2  | 158826966 | G | A | rs66539140  | 7.58E-01 | 0.126 | 0.125 | 1.01 | 0.86 | -1.19 | 2.78E-05 | 0.150 | 0.113 | 1.39 | 1.19 | -1.61 | 1.21 | 2.05E-03 | ACVR1(dist=94592), UPP2(dist=24725)               | intergenic     |
| 14 | 62731724  | T | G | rs11158386  | 6.77E-01 | 0.389 | 0.395 | 1.03 | 0.92 | -1.15 | 5.35E-05 | 0.418 | 0.361 | 0.79 | 0.71 | -0.87 | 0.88 | 2.08E-03 | LINC00644(dist=125033), KCNHS5(dist=441567)       | intergenic     |
| 10 | 97349766  | C | G | rs7915912   | 1.66E-05 | 0.203 | 0.165 | 1.29 | 1.12 | -1.49 | 6.79E-01 | 0.171 | 0.162 | 1.06 | 0.93 | -1.22 | 1.19 | 2.08E-03 | SORBS1(dist=28589), ALDH18A1(dist=15920)          | intergenic     |
| 3  | 143081155 | C | G | rs140013969 | 8.20E-01 | 0.052 | 0.054 | 0.97 | 0.76 | -1.23 | 1.75E-05 | 0.065 | 0.043 | 1.56 | 1.25 | -1.94 | 1.34 | 2.09E-03 | SLC9A9                                            | intronic       |
| 1  | 90077462  | C | G | rs1215536   | 4.51E-05 | 0.518 | 0.447 | 0.75 | 0.67 | -0.84 | 6.85E-01 | 0.504 | 0.494 | 1.04 | 0.94 | -1.16 | 0.88 | 2.09E-03 | LRRC8B(dist=14042), FLJ27354(dist=12946)          | intergenic     |
| 1  | 90077723  | T | G | rs1215535   | 4.52E-05 | 0.518 | 0.447 | 0.75 | 0.67 | -0.84 | 6.85E-01 | 0.504 | 0.494 | 1.04 | 0.94 | -1.16 | 0.88 | 2.09E-03 | LRRC8B(dist=14303), FLJ27354(dist=12685)          | intergenic     |
| 3  | 143080794 | A | G | rs78986929  | 8.21E-01 | 0.052 | 0.054 | 0.97 | 0.76 | -1.23 | 1.76E-05 | 0.065 | 0.043 | 1.56 | 1.25 | -1.94 | 1.34 | 2.10E-03 | SLC9A9                                            | intronic       |
| 1  | 90078395  | G | A | rs1215532   | 4.54E-05 | 0.518 | 0.447 | 0.75 | 0.67 | -0.84 | 6.86E-01 | 0.504 | 0.494 | 1.04 | 0.94 | -1.16 | 0.88 | 2.10E-03 | LRRC8B(dist=14975), FLJ27354(dist=12013)          | intergenic     |
| 1  | 90080635  | T | C | rs1215526   | 4.62E-05 | 0.519 | 0.448 | 0.75 | 0.67 | -0.84 | 6.83E-01 | 0.503 | 0.493 | 1.04 | 0.94 | -1.16 | 0.88 | 2.10E-03 | LRRC8B(dist=17215), FLJ27354(dist=9773)           | intergenic     |
| 1  | 90075604  | T | C | rs1215540   | 4.44E-05 | 0.518 | 0.447 | 0.75 | 0.67 | -0.84 | 6.90E-01 | 0.505 | 0.494 | 1.04 | 0.94 | -1.16 | 0.88 | 2.11E-03 | LRRC8B(dist=12184), FLJ27354(dist=14804)          | intergenic     |
| 15 | 48770884  | C | G | rs12591552  | 4.05E-05 | 0.313 | 0.268 | 1.24 | 1.1  | -1.4  | 8.43E-01 | 0.286 | 0.279 | 1.04 | 0.92 | -1.16 | 1.15 | 2.12E-03 | FBN1                                              | intronic       |
| 11 | 36918843  | A | G | rs73452356  | 8.17E-01 | 0.055 | 0.058 | 0.96 | 0.76 | -1.21 | 2.14E-05 | 0.071 | 0.045 | 1.61 | 1.3  | -1.99 | 1.33 | 2.12E-03 | C11orf74(dist=238002), LOC103312105(dist=1720971) | intergenic     |
| 5  | 13916302  | C | A | rs11750882  | 7.43E-01 | 0.471 | 0.464 | 0.97 | 0.87 | -1.09 | 4.37E-05 | 0.514 | 0.466 | 0.82 | 0.74 | -0.91 | 0.88 | 2.12E-03 | DNAH5                                             | intronic       |
| 6  | 29412600  | C | T | rs61201055  | 6.08E-01 | 0.107 | 0.114 | 0.93 | 0.78 | -1.11 | 1.05E-06 | 0.144 | 0.098 | 1.55 | 1.33 | -1.81 | 1.22 | 2.13E-03 | OR10C1(dist=3846), OR2H1(dist=13630)              | intergenic     |
| 1  | 90074072  | G | A | rs946386    | 4.37E-05 | 0.518 | 0.447 | 0.75 | 0.67 | -0.84 | 6.96E-01 | 0.505 | 0.495 | 1.04 | 0.94 | -1.16 | 0.88 | 2.13E-03 | LRRC8B(dist=10652), FLJ27354(dist=16336)          | intergenic     |
| 15 | 48771419  | C | G | rs12902728  | 4.10E-05 | 0.313 | 0.268 | 1.24 | 1.1  | -1.4  | 8.43E-01 | 0.286 | 0.279 | 1.04 | 0.92 | -1.16 | 1.15 | 2.14E-03 | FBN1                                              | intronic       |
| 17 | 33196834  | G | A | rs116740585 | 3.05E-05 | 0.051 | 0.082 | 0.60 | 0.48 | -0.75 | 9.41E-01 | 0.061 | 0.059 | 1.03 | 0.83 | -1.28 | 0.78 | 2.14E-03 | TMEM132E(dist=230492), CCT6B(dist=58044)          | intergenic     |
| 1  | 90073808  | T | C | rs946385    | 4.37E-05 | 0.518 | 0.446 | 0.75 | 0.67 | -0.84 | 6.97E-01 | 0.505 | 0.495 | 1.04 | 0.94 | -1.16 | 0.88 | 2.14E-03 | LRRC8B(dist=10388), FLJ27354(dist=16600)          | intergenic     |
| 6  | 29415652  | T | C | rs6929603   | 5.93E-01 | 0.108 | 0.115 | 0.93 | 0.78 | -1.11 | 8.90E-07 | 0.145 | 0.099 | 1.54 | 1.32 | -1.8  | 1.22 | 2.15E-03 | OR10C1(dist=6898), OR2H1(dist=10578)              | intergenic     |
| 3  | 133729578 | C | T | rs150831364 | 8.01E-01 | 0.034 | 0.034 | 0.99 | 0.73 | -1.34 | 4.29E-06 | 0.036 | 0.021 | 1.69 | 1.25 | -2.29 | 1.61 | 2.15E-03 | SLCO2A1                                           | intronic       |
| 1  | 90073389  | T | C | rs1215545   | 4.38E-05 | 0.518 | 0.446 | 0.75 | 0.67 | -0.84 | 6.99E-01 | 0.505 | 0.495 | 1.04 | 0.94 | -1.16 | 0.88 | 2.15E-03 | LRRC8B(dist=9969), FLJ27354(dist=17019)           | intergenic     |
| 10 | 97338549  | C | T | rs6584010   | 2.72E-05 | 0.208 | 0.171 | 1.27 | 1.11 | -1.46 | 6.11E-01 | 0.177 | 0.167 | 1.07 | 0.94 | -1.23 | 1.18 | 2.16E-03 | SORBS1(dist=17372), ALDH18A1(dist=27137)          | intergenic     |
| 6  | 32457041  | C | A | rs76327699  | 7.12E-06 | 0.133 | 0.165 | 0.77 | 0.66 | -0.9  | 9.86E-01 | 0.145 | 0.150 | 0.96 | 0.83 | -1.11 | 0.80 | 2.17E-03 | HLA-DRA(dist=44215), HLA-DRB5(dist=28113)         | intergenic     |
| 12 | 8766844   | A |   |             |          |       |       |      |      |       |          |       |       |      |      |       |      |          |                                                   |                |

|    |           |   |   |                        |          |       |       |      |      |       |          |       |       |      |      |       |      |          |                                                   |                |
|----|-----------|---|---|------------------------|----------|-------|-------|------|------|-------|----------|-------|-------|------|------|-------|------|----------|---------------------------------------------------|----------------|
| 4  | 96531776  | C | T | rs72878392             | 6.50E-05 | 0.162 | 0.131 | 1.29 | 1.1  | -1.5  | 7.40E-01 | 0.138 | 0.130 | 1.07 | 0.92 | -1.25 | 1.19 | 2.26E-03 | UNC5C(dist=61415), PDHA2(dist=229463)             | intergenic     |
| 1  | 90072888  | C | T | rs1215547              | 4.43E-05 | 0.526 | 0.455 | 0.75 | 0.67 | -0.84 | 6.99E-01 | 0.505 | 0.495 | 1.04 | 0.94 | -1.16 | 0.88 | 2.28E-03 | LRRC8B(dist=9468), FLJ27354(dist=17520)           | intergenic     |
| 2  | 158814650 | C | T | rs12988329             | 9.50E-01 | 0.128 | 0.129 | 1.00 | 0.85 | -1.17 | 1.24E-05 | 0.158 | 0.118 | 1.40 | 1.21 | -1.63 | 1.20 | 2.28E-03 | ACVR1(dist=82276), UPP2(dist=37041)               | intergenic     |
| 3  | 143074864 | A | G | rs115851154            | 8.34E-01 | 0.052 | 0.054 | 0.96 | 0.75 | -1.23 | 1.93E-05 | 0.065 | 0.043 | 1.56 | 1.25 | -1.94 | 1.34 | 2.28E-03 | SLC9A9                                            | intronic       |
| 21 | 46574554  | G | A | rs372519               | 2.53E-05 | 0.520 | 0.462 | 1.26 | 1.13 | -1.41 | 7.89E-01 | 0.499 | 0.497 | 1.01 | 0.91 | -1.12 | 1.14 | 2.29E-03 | ADARB1                                            | intronic       |
| 7  | 79005116  | C | T | rs10257558             | 9.64E-01 | 0.110 | 0.112 | 0.98 | 0.82 | -1.16 | 4.25E-06 | 0.134 | 0.097 | 1.44 | 1.23 | -1.68 | 1.23 | 2.30E-03 | MAGI2                                             | intronic       |
| 17 | 33264298  | T | C | rs115194317            | 3.37E-05 | 0.051 | 0.082 | 0.60 | 0.48 | -0.76 | 9.46E-01 | 0.061 | 0.059 | 1.03 | 0.83 | -1.28 | 0.78 | 2.30E-03 | CCT6B                                             | intronic       |
| 7  | 79005504  | A | G | rs10273372             | 9.65E-01 | 0.110 | 0.112 | 0.98 | 0.82 | -1.16 | 4.30E-06 | 0.134 | 0.097 | 1.44 | 1.23 | -1.68 | 1.23 | 2.31E-03 | MAGI2                                             | intronic       |
| 7  | 79009106  | C | A | rs10252300             | 9.52E-01 | 0.110 | 0.112 | 0.98 | 0.82 | -1.17 | 4.77E-06 | 0.134 | 0.097 | 1.43 | 1.22 | -1.68 | 1.23 | 2.32E-03 | MAGI2                                             | intronic       |
| 6  | 96713461  | C | T | rs62417778             | 5.69E-05 | 0.056 | 0.083 | 0.65 | 0.52 | -0.81 | 7.58E-01 | 0.066 | 0.075 | 0.88 | 0.72 | -1.08 | 0.78 | 2.32E-03 | FUT9(dist=49973), UFL1(dist=256241)               | intergenic     |
| 2  | 60147167  | C | T | rs2113798              | 9.72E-01 | 0.478 | 0.481 | 1.01 | 0.91 | -1.13 | 1.38E-05 | 0.427 | 0.481 | 1.24 | 1.12 | -1.38 | 1.13 | 2.33E-03 | LOC101927285(dist=640632), MIR4432(dist=467330)   | intergenic     |
| 9  | 38055128  | A | G | rs3849927              | 7.46E-01 | 0.342 | 0.338 | 0.98 | 0.87 | -1.1  | 5.71E-05 | 0.369 | 0.320 | 0.81 | 0.72 | -0.9  | 0.88 | 2.33E-03 | SHB                                               | intronic       |
| 11 | 77859397  | A | G | rs77447197             | 6.23E-01 | 0.053 | 0.052 | 1.01 | 0.79 | -1.29 | 3.15E-05 | 0.058 | 0.036 | 1.66 | 1.31 | -2.11 | 1.36 | 2.33E-03 | KCTD21-AS1                                        | ncRNA_intronic |
| 11 | 36928544  | A | G | rs73452364             | 8.16E-01 | 0.056 | 0.058 | 0.96 | 0.76 | -1.22 | 2.55E-05 | 0.071 | 0.046 | 1.60 | 1.29 | -1.98 | 1.33 | 2.35E-03 | C11orf74(dist=247703), LOC103312105(dist=1711270) | intergenic     |
| 14 | 62732172  | A | G | rs34956369;rs11158388  | 8.02E-01 | 0.393 | 0.400 | 1.03 | 0.92 | -1.15 | 5.74E-05 | 0.429 | 0.373 | 0.79 | 0.71 | -0.88 | 0.88 | 2.36E-03 | LINC00644(dist=125481), KCNH5(dist=441119)        | intergenic     |
| 12 | 50774271  | A | G | rs7303163              | 8.27E-06 | 0.056 | 0.028 | 2.05 | 1.55 | -2.71 | 9.20E-01 | 0.059 | 0.063 | 0.93 | 0.74 | -1.15 | 1.36 | 2.37E-03 | KCNA1(dist=49999), KCNA5(dist=75664)              | intergenic     |
| 6  | 141711296 | G | A | rs149952738            | 7.47E-01 | 0.055 | 0.055 | 1.00 | 0.79 | -1.27 | 4.87E-05 | 0.072 | 0.047 | 1.56 | 1.26 | -1.92 | 1.33 | 2.38E-03 | MIR4465(dist=706276), NMBR(dist=685449)           | intergenic     |
| 21 | 25448107  | C | A | rs1699639              | 9.39E-01 | 0.049 | 0.049 | 0.99 | 0.77 | -1.27 | 8.93E-06 | 0.057 | 0.035 | 1.66 | 1.31 | -2.11 | 1.38 | 2.38E-03 | D21S2088E(dist=690951), LOC101927869(dist=228756) | intergenic     |
| 6  | 141706496 | A | G | rs116839492            | 7.33E-01 | 0.055 | 0.055 | 1.00 | 0.79 | -1.27 | 5.42E-05 | 0.071 | 0.047 | 1.56 | 1.26 | -1.93 | 1.32 | 2.39E-03 | MIR4465(dist=701476), NMBR(dist=690249)           | intergenic     |
| 14 | 62730395  | A | C | rs4902121              | 8.66E-01 | 0.390 | 0.398 | 1.03 | 0.92 | -1.16 | 2.92E-05 | 0.408 | 0.350 | 0.78 | 0.7  | -0.87 | 0.88 | 2.41E-03 | LINC00644(dist=123704), KCNH5(dist=442896)        | intergenic     |
| 6  | 141707890 | C | G | rs150824548            | 7.48E-01 | 0.055 | 0.056 | 1.00 | 0.79 | -1.27 | 4.94E-05 | 0.072 | 0.047 | 1.56 | 1.26 | -1.92 | 1.32 | 2.41E-03 | MIR4465(dist=702870), NMBR(dist=688855)           | intergenic     |
| 2  | 158812615 | C | T | rs13023945             | 8.47E-01 | 0.129 | 0.128 | 1.00 | 0.85 | -1.18 | 2.11E-05 | 0.155 | 0.117 | 1.39 | 1.2  | -1.61 | 1.20 | 2.42E-03 | ACVR1(dist=80241), UPP2(dist=39076)               | intergenic     |
| 10 | 97336379  | C | G | rs7305365              | 2.73E-05 | 0.208 | 0.171 | 1.27 | 1.11 | -1.46 | 6.35E-01 | 0.178 | 0.168 | 1.07 | 0.93 | -1.23 | 1.18 | 2.42E-03 | SORBS1(dist=15202), ALDH18A1(dist=29307)          | intergenic     |
| 6  | 108724531 | C | T | rs56945680             | 6.15E-01 | 0.161 | 0.174 | 0.91 | 0.78 | -1.05 | 6.20E-05 | 0.127 | 0.152 | 0.81 | 0.7  | -0.95 | 0.84 | 2.42E-03 | LACE1                                             | intronic       |
| 18 | 72900325  | C | T | rs115921118            | 4.61E-05 | 0.060 | 0.039 | 1.57 | 1.22 | -2.03 | 9.44E-01 | 0.035 | 0.034 | 1.03 | 0.77 | -1.37 | 1.38 | 2.42E-03 | ZNF407(dist=122697), ZADH2(dist=8953)             | intergenic     |
| 19 | 36712221  | C | T | rs147959229            | 9.69E-01 | 0.067 | 0.072 | 0.93 | 0.75 | -1.16 | 3.79E-05 | 0.099 | 0.070 | 1.45 | 1.21 | -1.74 | 1.30 | 2.43E-03 | ZNF146                                            | intronic       |
| 2  | 140061178 | C | T | rs1344973              | 6.45E-01 | 0.458 | 0.467 | 1.04 | 0.93 | -1.16 | 4.86E-05 | 0.419 | 0.463 | 1.20 | 1.08 | -1.33 | 1.15 | 2.43E-03 | YY1P2(dist=404434), LRP1B(dist=927818)            | intergenic     |
| 6  | 29409106  | T | C | rs11968684;rs386698375 | 6.11E-01 | 0.107 | 0.114 | 0.93 | 0.78 | -1.11 | 7.92E-07 | 0.136 | 0.092 | 1.56 | 1.33 | -1.83 | 1.22 | 2.43E-03 | OR10C1                                            | downstream     |
| 2  | 158824518 | G | A | rs13014993             | 7.40E-01 | 0.132 | 0.130 | 1.01 | 0.86 | -1.19 | 4.45E-05 | 0.157 | 0.120 | 1.37 | 1.18 | -1.59 | 1.20 | 2.43E-03 | ACVR1(dist=92144), UPP2(dist=27173)               | intergenic     |
| 5  | 37970920  | G | C | rs13183095             | 9.94E-01 | 0.426 | 0.426 | 1.00 | 0.9  | -1.12 | 1.10E-05 | 0.374 | 0.425 | 0.81 | 0.72 | -0.9  | 0.88 | 2.44E-03 | GDNF-AS1(dist=95020), EGFLAM(dist=287591)         | intergenic     |
| 15 | 99638949  | A | G | rs1703796              | 6.40E-05 | 0.318 | 0.351 | 1.16 | 1.03 | -1.3  | 8.38E-01 | 0.385 | 0.404 | 1.08 | 0.97 | -1.2  | 1.15 | 2.44E-03 | LUNAR1(dist=64674), SYNM(dist=6337)               | intergenic     |
| 10 | 15436365  | T | C | rs11594332             | 9.79E-01 | 0.079 | 0.074 | 1.07 | 0.87 | -1.32 | 1.95E-05 | 0.100 | 0.076 | 1.34 | 1.12 | -1.6  | 1.27 | 2.48E-03 | FAM171A1(dist=23307), ITGA8(dist=119583)          | intergenic     |
| 10 | 97329911  | T | C | rs11188367             | 3.50E-05 | 0.224 | 0.185 | 1.27 | 1.11 | -1.46 | 5.96E-01 | 0.198 | 0.189 | 1.06 | 0.93 | -1.21 | 1.18 | 2.49E-03 | SORBS1(dist=8734), ALDH18A1(dist=35775)           | intergenic     |
| 2  | 158831351 | C | T | rs34449717             | 7.61E-01 | 0.128 | 0.127 | 1.01 | 0.86 | -1.19 | 3.98E-05 | 0.154 | 0.117 | 1.37 | 1.18 | -1.59 | 1.21 | 2.49E-03 | ACVR1(dist=98977), UPP2(dist=20340)               | intergenic     |
| 16 | 85081912  | A | G | rs8051294              | 9.16E-01 | 0.400 | 0.390 | 0.96 | 0.86 | -1.07 | 3.41E-05 | 0.360 | 0.422 | 1.29 | 1.16 | -1.44 | 1.14 | 2.50E-03 | KIAA0513                                          | intronic       |
| 21 | 46629464  | G | C | rs3788183              | 5.77E-05 | 0.487 | 0.431 | 1.25 | 1.12 | -1.4  | 6.50E-01 | 0.469 | 0.467 | 1.01 | 0.91 | -1.12 | 1.13 | 2.50E-03 | ADARB1                                            | intronic       |
| 15 | 89857804  | T | C | rs16943013             | 8.47E-01 | 0.058 | 0.060 | 0.96 | 0.76 | -1.21 | 5.08E-05 | 0.072 | 0.046 | 1.60 | 1.29 | -1.98 | 1.31 | 2.51E-03 | FANCI                                             | intronic       |
| 10 | 83319665  | C | T | rs116631201            | 6.29E-01 | 0.084 | 0.085 | 0.98 | 0.81 | -1.2  | 4.00E-05 | 0.092 | 0.067 | 1.41 | 1.17 | -1.7  | 1.29 | 2.51E-03 | SH2D4B(dist=913349), NRG3(dist=315405)            | intergenic     |
| 8  | 19011610  | C | T | rs115423277            | 5.58E-05 | 0.026 | 0.049 | 0.53 | 0.39 | -0.72 | 9.38E-01 | 0.032 | 0.031 | 1.04 | 0.77 | -1.39 | 0.70 | 2.51E-03 | PSD3(dist=140414), LOC100128993(dist=29576)       | intergenic     |
| 1  | 90079678  | C | T | rs1215529              | 5.43E-05 | 0.517 | 0.447 | 0.76 | 0.68 | -0.84 | 7.17E-01 | 0.505 | 0.495 | 1.04 | 0.94 | -1.16 | 0.88 | 2.52E-03 | LRRC8B(dist=16258), FLJ27354(dist=10730)          | intergenic     |
| 2  | 224794396 | T | C | rs73992110             | 2.13E-05 | 0.043 | 0.023 | 1.90 | 1.39 | -2.6  | 7.83E-01 | 0.029 | 0.028 | 1.01 | 0.74 | -1.38 | 1.47 | 2.54E-03 | WDFY1                                             | intronic       |
| 16 | 85080848  | C | T | rs8045387              | 8.40E-01 | 0.401 | 0.392 | 0.96 | 0.86 | -1.08 | 5.91E-05 | 0.370 | 0.429 | 1.28 | 1.15 | -1.42 | 1.14 | 2.55E-03 | KIAA0513                                          | intronic       |
| 3  | 64053207  | T | C | rs166230               | 8.04E-01 | 0.211 | 0.211 | 1.00 | 0.88 | -1.14 | 5.57E-05 | 0.225 | 0.186 | 0.79 | 0.69 | -0.89 | 0.86 | 2.56E-03 | PRICKLE2-AS1                                      | upstream       |
| 7  | 79010235  | C | T | rs78254548             | 9.83E-01 | 0.108 | 0.110 | 0.98 | 0.82 | -1.16 | 5.31E-06 | 0.131 | 0.095 | 1.44 | 1.23 | -1.69 | 1.23 | 2.56E-03 | MAGI2                                             | intronic       |
| 11 | 36977975  | G | A | rs115455621            | 8.15E-01 | 0.034 | 0.035 | 0.96 | 0.71 | -1.29 | 8.68E-06 | 0.042 | 0.024 | 1.80 | 1.36 | -2.39 | 1.45 | 2.56E-03 | C11orf74(dist=297134), LOC103312105(dist=1661839) | intergenic     |
| 1  | 198606892 | C | G | rs114368190            | 5.95E-05 | 0.039 | 0.024 | 1.69 | 1.23 | -2.32 | 7.08E-01 | 0.032 | 0.029 | 1.12 | 0.83 | -1.52 | 1.46 | 2.56E-03 | ATP6V1G3(dist=96817), PTPRC(dist=1206)            | intergenic     |
| 10 | 83340308  | G | A | rs1933289              | 5.80E-01 | 0.084 | 0.085 | 0.99 | 0.81 | -1.21 | 6.34E-05 | 0.091 | 0.066 | 1.41 | 1.17 | -1.7  | 1.29 | 2.57E-03 | SH2D4B(dist=933992), NRG3(dist=294762)            | intergenic     |
| 5  | 37966315  | C | G | rs2292262              | 9.90E-01 | 0.471 | 0.475 | 0.98 | 0.88 | -1.1  | 1.40E-05 | 0.417 | 0.466 | 0.82 | 0.74 | -0.91 | 0.88 | 2.57E-03 | GDNF-AS1(dist=90415), EGFLAM(dist=292196)         | intergenic     |
| 11 | 102671839 | C | T | rs116002430            | 9.89E-01 | 0.026 | 0.027 | 0.98 | 0.7  | -1.38 | 3.41E-05 | 0.042 | 0.023 | 1.82 | 1.37 | -2.41 | 1.48 | 2.57E-03 | WTAPP1                                            | ncRNA_intronic |
| 3  | 59745406  | C | G | rs4679504              | 9.46E-01 | 0.028 | 0.023 | 1.21 | 0.86 | -1.71 | 6.27E-05 | 0.041 | 0.028 | 1.50 | 1.14 | -1.97 | 1.47 | 2.57E-03 | FHIT                                              | intronic       |
| 5  | 37957085  | T | C | rs6898456              | 7.49E-01 | 0.299 | 0.304 | 0.98 | 0.87 | -1.1  | 6.41E-05 | 0.263 | 0.308 | 0.80 | 0.71 | -0.9  | 0.87 | 2.59E-03 | GDNF-AS1(dist=81185), EGFLAM(dist=301426)         | intergenic     |
| 12 | 114982445 | A | G | rs10774757             | 9.03E-01 | 0.350 | 0.353 | 0.99 | 0.88 | -1.11 | 1.12E-05 | 0.377 | 0.328 | 1.24 | 1.11 | -1.38 | 1.15 | 2.60E-03 | TBX5-AS1(dist=131808), TBX3(dist=125614)          | intergenic     |
| 17 | 33294069  | G | A | rs141340287            | 4.35E-05 | 0.052 | 0.082 | 0.61 | 0.48 | -0.76 | 9.30E-01 | 0.061 | 0.060 | 1.03 | 0.83 | -1.28 | 0.78 | 2.61E-03 | ZNF830(dist=3864), LIG3(dist=13448)               | intergenic     |
| 7  | 79000955  | C | T | rs6943036              | 9.57E-01 | 0.110 | 0.112 | 0.98 | 0.82 | -1.16 | 6.05E-06 | 0.135 | 0.098 | 1.43 | 1.22 | -1.67 | 1.23 | 2.61E-03 | MAGI2                                             | intronic       |
| 10 | 97237794  | A | G | rs998292               | 5.25E-05 | 0.409 | 0.463 | 1.25 | 1.12 | -1.39 | 5.30E-01 | 0.421 | 0.429 | 1.03 | 0.93 | -1.15 | 1.13 | 2.61E-03 | SORBS1                                            | intronic       |
| 2  | 46188304  | C | G | rs6728293              | 5.58E-06 | 0.046 | 0.027 | 1.77 | 1.32 | -2.39 | 4.35E-01 | 0.027 | 0.028 | 0.97 | 0.71 | -1.34 | 1.51 | 2.61E-03 | PRKCE                                             | intronic       |
| 17 | 33083458  | C | G | rs76783155             | 3.01E-05 | 0.052 | 0.083 | 0.60 | 0.48 | -     |          |       |       |      |      |       |      |          |                                                   |                |

|    |           |   |   |                       |          |       |       |      |      |       |          |       |       |      |      |       |      |          |                                                   |                |
|----|-----------|---|---|-----------------------|----------|-------|-------|------|------|-------|----------|-------|-------|------|------|-------|------|----------|---------------------------------------------------|----------------|
| 19 | 57274399  | G | A | rs145569750           | 8.51E-01 | 0.038 | 0.039 | 0.97 | 0.73 | -1.29 | 3.25E-05 | 0.030 | 0.045 | 0.65 | 0.49 | -0.88 | 0.70 | 2.71E-03 | ZNF835(dist=91276), ZIM2-AS1(dist=2291)           | intergenic     |
| 3  | 64009508  | T | C | rs40610               | 8.18E-01 | 0.215 | 0.219 | 0.98 | 0.86 | -1.12 | 1.09E-05 | 0.262 | 0.217 | 1.28 | 1.14 | -1.45 | 1.16 | 2.72E-03 | PSMD6                                             | exonic         |
| 16 | 85089570  | A | C | rs11647328            | 9.77E-01 | 0.396 | 0.384 | 0.95 | 0.85 | -1.06 | 2.55E-05 | 0.360 | 0.422 | 1.30 | 1.17 | -1.45 | 1.13 | 2.72E-03 | KIAA0513                                          | intronic       |
| 16 | 85089684  | A | G | rs11647376            | 9.77E-01 | 0.396 | 0.384 | 0.95 | 0.85 | -1.06 | 2.56E-05 | 0.360 | 0.422 | 1.30 | 1.17 | -1.45 | 1.13 | 2.73E-03 | KIAA0513                                          | intronic       |
| 3  | 143026285 | A | T | rs111532413           | 9.73E-01 | 0.033 | 0.034 | 0.97 | 0.71 | -1.31 | 1.51E-05 | 0.045 | 0.027 | 1.71 | 1.31 | -2.24 | 1.44 | 2.74E-03 | SLC9A9                                            | intronic       |
| 10 | 34417835  | A | G | rs1415546             | 3.92E-05 | 0.318 | 0.377 | 0.77 | 0.69 | -0.86 | 5.95E-01 | 0.335 | 0.340 | 0.97 | 0.87 | -1.09 | 0.88 | 2.74E-03 | PARD3                                             | intronic       |
| 10 | 50134180  | C | T | rs10735227            | 7.31E-06 | 0.250 | 0.186 | 1.46 | 1.28 | -1.67 | 8.95E-01 | 0.248 | 0.256 | 0.96 | 0.85 | -1.08 | 1.18 | 2.76E-03 | WDFY4                                             | intronic       |
| 10 | 83318001  | C | T | rs138691092           | 6.62E-01 | 0.083 | 0.085 | 0.98 | 0.8  | -1.19 | 3.97E-05 | 0.093 | 0.067 | 1.41 | 1.17 | -1.7  | 1.29 | 2.77E-03 | SH2D4B(dist=911685), NRG3(dist=317069)            | intergenic     |
| 2  | 57694254  | T | C | rs75576248            | 6.99E-01 | 0.032 | 0.028 | 1.15 | 0.84 | -1.59 | 2.85E-05 | 0.040 | 0.026 | 1.57 | 1.18 | -2.08 | 1.47 | 2.78E-03 | CCDC85A(dist=1080945), VRK2(dist=440532)          | intergenic     |
| 8  | 49975746  | G | A | rs2385127             | 5.19E-05 | 0.334 | 0.375 | 0.84 | 0.75 | -0.94 | 8.02E-01 | 0.361 | 0.376 | 0.94 | 0.84 | -1.04 | 0.88 | 2.79E-03 | C8orf22                                           | intronic       |
| 2  | 140216853 | C | T | rs11899681            | 8.58E-01 | 0.494 | 0.488 | 0.98 | 0.88 | -1.09 | 2.75E-05 | 0.526 | 0.466 | 1.27 | 1.14 | -1.41 | 1.13 | 2.81E-03 | YY1P2(dist=560109), LRP1B(dist=772143)            | intergenic     |
| 10 | 83317761  | A | G | rs150110036           | 6.67E-01 | 0.083 | 0.085 | 0.98 | 0.8  | -1.19 | 3.96E-05 | 0.093 | 0.067 | 1.41 | 1.17 | -1.7  | 1.29 | 2.81E-03 | SH2D4B(dist=911445), NRG3(dist=317309)            | intergenic     |
| 12 | 5066440   | C | T | rs79760117            | 5.46E-05 | 0.056 | 0.030 | 1.88 | 1.43 | -2.47 | 6.35E-01 | 0.059 | 0.061 | 0.96 | 0.77 | -1.2  | 1.35 | 2.82E-03 | KCNA1(dist=39018), KCNA5(dist=86645)              | intergenic     |
| 8  | 62254719  | C | G | rs113127855           | 9.05E-01 | 0.049 | 0.052 | 0.94 | 0.73 | -1.21 | 7.55E-06 | 0.060 | 0.036 | 1.71 | 1.35 | -2.16 | 1.36 | 2.83E-03 | CLVS1                                             | intronic       |
| 10 | 121921817 | T | C | rs7078528             | 9.97E-01 | 0.265 | 0.268 | 1.02 | 0.9  | -1.15 | 4.33E-05 | 0.223 | 0.266 | 1.26 | 1.11 | -1.42 | 1.15 | 2.85E-03 | MIR4682(dist=203713), PPAADC1A(dist=294649)       | intergenic     |
| 16 | 85085395  | G | A | rs12923299            | 9.88E-01 | 0.396 | 0.384 | 0.95 | 0.85 | -1.06 | 3.25E-05 | 0.356 | 0.418 | 1.30 | 1.17 | -1.45 | 1.13 | 2.86E-03 | KIAA0513                                          | intronic       |
| 10 | 97329035  | A | C | rs12257523            | 2.45E-05 | 0.206 | 0.169 | 1.27 | 1.11 | -1.46 | 6.84E-01 | 0.177 | 0.168 | 1.07 | 0.93 | -1.22 | 1.18 | 2.87E-03 | SORBS1(dist=7858), ALDH18A1(dist=36651)           | intergenic     |
| 10 | 97333234  | T | C | rs7912555             | 3.33E-05 | 0.209 | 0.173 | 1.26 | 1.1  | -1.45 | 6.51E-01 | 0.178 | 0.168 | 1.07 | 0.93 | -1.23 | 1.18 | 2.89E-03 | SORBS1(dist=12057), ALDH18A1(dist=32452)          | intergenic     |
| 10 | 49947642  | C | T | rs17836423            | 3.97E-05 | 0.041 | 0.023 | 1.85 | 1.34 | -2.54 | 5.11E-01 | 0.036 | 0.036 | 1.01 | 0.76 | -1.33 | 1.58 | 2.90E-03 | WDFY4                                             | intronic       |
| 6  | 32457038  | T | C | rs77585607            | 7.34E-06 | 0.130 | 0.162 | 0.77 | 0.66 | -0.9  | 8.98E-01 | 0.145 | 0.149 | 0.97 | 0.83 | -1.12 | 0.81 | 2.90E-03 | HLA-DRA(dist=44212), HLA-DRB5(dist=28116)         | intergenic     |
| 5  | 176148118 | G | T | rs79679848            | 2.90E-05 | 0.068 | 0.044 | 1.57 | 1.24 | -1.99 | 9.83E-01 | 0.045 | 0.045 | 1.00 | 0.78 | -1.29 | 1.34 | 2.91E-03 | TSPAN17(dist=62059), LINC01574(dist=22088)        | intergenic     |
| 12 | 5079155   | A | C | rs77941559            | 1.56E-05 | 0.054 | 0.028 | 2.03 | 1.53 | -2.7  | 9.02E-01 | 0.058 | 0.062 | 0.93 | 0.74 | -1.16 | 1.35 | 2.92E-03 | KCNA1(dist=51733), KCNA5(dist=73930)              | intergenic     |
| 1  | 198638542 | G | C | rs76317261            | 6.22E-05 | 0.041 | 0.024 | 1.70 | 1.25 | -2.33 | 7.28E-01 | 0.033 | 0.030 | 1.11 | 0.83 | -1.49 | 1.42 | 2.95E-03 | PTPRC                                             | intronic       |
| 18 | 3170259   | A | G | rs6506080             | 4.38E-05 | 0.419 | 0.365 | 0.80 | 0.71 | -0.89 | 8.53E-01 | 0.399 | 0.394 | 0.98 | 0.88 | -1.09 | 0.88 | 2.96E-03 | MYOM1                                             | intronic       |
| 5  | 37989879  | T | C | rs7726340             | 8.81E-01 | 0.376 | 0.374 | 1.01 | 0.9  | -1.13 | 9.24E-06 | 0.334 | 0.387 | 0.80 | 0.71 | -0.89 | 0.88 | 2.97E-03 | GDNF-AS1(dist=113979), EGFLAM(dist=268632)        | intergenic     |
| 11 | 36923511  | A | G | rs113718317           | 7.42E-01 | 0.055 | 0.057 | 0.97 | 0.76 | -1.23 | 6.06E-05 | 0.069 | 0.045 | 1.58 | 1.27 | -1.96 | 1.32 | 2.97E-03 | C11orf74(dist=242670), LOC103312105(dist=1716303) | intergenic     |
| 12 | 12254476  | A | G | rs4763781             | 7.22E-01 | 0.303 | 0.290 | 0.94 | 0.83 | -1.06 | 2.63E-05 | 0.258 | 0.317 | 1.34 | 1.19 | -1.51 | 1.15 | 2.97E-03 | BCL2L14(dist=1849), MIR1244-4(dist=10410)         | intergenic     |
| 5  | 13916739  | C | T | rs1445821             | 8.71E-01 | 0.472 | 0.468 | 0.98 | 0.88 | -1.1  | 4.05E-05 | 0.516 | 0.467 | 0.82 | 0.74 | -0.91 | 0.89 | 2.98E-03 | DNAH5                                             | intronic       |
| 14 | 82250104  | G | A | rs112025783           | 4.04E-05 | 0.106 | 0.150 | 0.67 | 0.57 | -0.79 | 8.11E-01 | 0.123 | 0.119 | 1.04 | 0.88 | -1.21 | 0.83 | 2.98E-03 | LINC01467(dist=160699), NONE(dist=NONE)           | intergenic     |
| 5  | 13917017  | A | G | rs11744581            | 8.71E-01 | 0.472 | 0.468 | 0.98 | 0.88 | -1.1  | 4.07E-05 | 0.516 | 0.467 | 0.82 | 0.74 | -0.91 | 0.89 | 2.99E-03 | DNAH5                                             | intronic       |
| 7  | 157986458 | T | C | rs1806612;rs386720284 | 8.82E-01 | 0.311 | 0.301 | 0.95 | 0.84 | -1.07 | 1.86E-05 | 0.304 | 0.359 | 1.28 | 1.15 | -1.43 | 1.15 | 2.99E-03 | PTPRN2                                            | intronic       |
| 8  | 32578999  | A | G | rs2975504             | 7.80E-01 | 0.040 | 0.037 | 0.93 | 0.7  | -1.23 | 4.31E-05 | 0.054 | 0.035 | 0.63 | 0.49 | -0.8  | 0.72 | 3.01E-03 | NRG1                                              | intronic       |
| 2  | 57674150  | T | A | rs2007699             | 7.41E-01 | 0.032 | 0.028 | 1.14 | 0.83 | -1.57 | 2.71E-05 | 0.040 | 0.025 | 1.59 | 1.2  | -2.11 | 1.46 | 3.01E-03 | CCDC85A(dist=1060841), VRK2(dist=460636)          | intergenic     |
| 1  | 158512923 | T | C | rs1342944             | 9.10E-06 | 0.517 | 0.451 | 0.77 | 0.69 | -0.86 | 9.38E-01 | 0.471 | 0.474 | 1.01 | 0.91 | -1.12 | 0.89 | 3.03E-03 | OR10R2(dist=62248), OR6Y1(dist=3995)              | intergenic     |
| 18 | 6557401   | G | A | rs78408598            | 7.63E-01 | 0.146 | 0.150 | 0.97 | 0.83 | -1.13 | 6.10E-05 | 0.183 | 0.144 | 1.33 | 1.16 | -1.53 | 1.21 | 3.03E-03 | LINC01387                                         | ncRNA_intronic |
| 21 | 25490017  | C | T | rs1632510             | 9.11E-01 | 0.044 | 0.044 | 0.98 | 0.75 | -1.28 | 7.23E-06 | 0.053 | 0.032 | 1.68 | 1.31 | -2.15 | 1.39 | 3.04E-03 | D21S2088E(dist=732861), LOC101927869(dist=186846) | intergenic     |
| 5  | 86352289  | T | C | rs7704274             | 8.59E-01 | 0.198 | 0.208 | 0.94 | 0.82 | -1.08 | 2.93E-05 | 0.165 | 0.199 | 0.80 | 0.69 | -0.92 | 0.86 | 3.06E-03 | LOC100505878(dist=306700), MIR4280(dist=58407)    | intergenic     |
| 1  | 197704717 | C | T | rs17641524            | 9.65E-01 | 0.049 | 0.042 | 1.18 | 0.91 | -1.53 | 6.17E-05 | 0.075 | 0.059 | 1.29 | 1.05 | -1.58 | 1.33 | 3.08E-03 | DENND1B                                           | exonic         |
| 15 | 87375771  | T | C | rs2123263             | 5.80E-05 | 0.376 | 0.336 | 0.84 | 0.75 | -0.94 | 8.83E-01 | 0.346 | 0.333 | 0.94 | 0.85 | -1.05 | 0.88 | 3.08E-03 | AGBL1                                             | intronic       |
| 16 | 85082684  | C | T | rs16975153            | 9.88E-01 | 0.397 | 0.385 | 0.95 | 0.85 | -1.06 | 3.22E-05 | 0.356 | 0.418 | 1.30 | 1.17 | -1.45 | 1.13 | 3.09E-03 | KIAA0513                                          | intronic       |
| 12 | 5079248   | C | T | rs78561728            | 2.34E-05 | 0.065 | 0.037 | 1.82 | 1.41 | -2.35 | 9.02E-01 | 0.058 | 0.062 | 0.93 | 0.74 | -1.16 | 1.35 | 3.10E-03 | KCNA1(dist=51826), KCNA5(dist=73837)              | intergenic     |
| 8  | 32578701  | C | T | rs2919374             | 7.87E-01 | 0.040 | 0.037 | 0.93 | 0.7  | -1.23 | 4.39E-05 | 0.054 | 0.035 | 0.63 | 0.49 | -0.8  | 0.72 | 3.10E-03 | NRG1                                              | intronic       |
| 16 | 85082374  | A | C | rs1532638             | 9.82E-01 | 0.395 | 0.383 | 0.95 | 0.85 | -1.06 | 3.14E-05 | 0.355 | 0.418 | 1.30 | 1.17 | -1.45 | 1.13 | 3.11E-03 | KIAA0513                                          | intronic       |
| 15 | 58656271  | A | C | rs28849098            | 7.34E-01 | 0.105 | 0.107 | 0.97 | 0.82 | -1.16 | 3.40E-05 | 0.104 | 0.073 | 1.48 | 1.24 | -1.77 | 1.24 | 3.14E-03 | AQP9(dist=178161), LIPC(dist=67904)               | intergenic     |
| 20 | 58308307  | A | G | rs16984986            | 7.41E-01 | 0.169 | 0.165 | 1.03 | 0.89 | -1.19 | 3.80E-05 | 0.178 | 0.146 | 1.27 | 1.1  | -1.46 | 1.21 | 3.15E-03 | PHACTR3                                           | intronic       |
| 2  | 57691542  | T | G | rs148126334           | 7.20E-01 | 0.032 | 0.028 | 1.15 | 0.83 | -1.58 | 3.06E-05 | 0.039 | 0.026 | 1.57 | 1.18 | -2.08 | 1.47 | 3.16E-03 | CCDC85A(dist=1078233), VRK2(dist=443244)          | intergenic     |
| 8  | 62263344  | C | T | rs79326694            | 8.95E-01 | 0.048 | 0.051 | 0.94 | 0.73 | -1.21 | 9.74E-06 | 0.060 | 0.036 | 1.71 | 1.35 | -2.16 | 1.35 | 3.18E-03 | CLVS1                                             | intronic       |
| 17 | 73801154  | T | C | rs9900933             | 8.62E-01 | 0.182 | 0.162 | 0.87 | 0.75 | -1    | 5.18E-05 | 0.229 | 0.212 | 0.90 | 0.8  | -1.02 | 0.84 | 3.18E-03 | UNK                                               | intronic       |
| 7  | 79000456  | C | T | rs10237230            | 9.81E-01 | 0.112 | 0.115 | 0.97 | 0.82 | -1.16 | 6.25E-06 | 0.135 | 0.099 | 1.42 | 1.21 | -1.66 | 1.22 | 3.18E-03 | MAGI2                                             | intronic       |
| 8  | 62264007  | G | A | rs79134451            | 8.95E-01 | 0.048 | 0.051 | 0.94 | 0.73 | -1.21 | 9.81E-06 | 0.060 | 0.036 | 1.71 | 1.35 | -2.16 | 1.35 | 3.20E-03 | CLVS1                                             | intronic       |
| 16 | 85090307  | G | A | rs9939536             | 9.58E-01 | 0.396 | 0.384 | 0.95 | 0.85 | -1.06 | 3.12E-05 | 0.362 | 0.424 | 1.30 | 1.16 | -1.44 | 1.13 | 3.20E-03 | KIAA0513                                          | intronic       |
| 15 | 58655129  | A | G | rs28457584            | 7.38E-01 | 0.105 | 0.107 | 0.97 | 0.82 | -1.16 | 3.43E-05 | 0.104 | 0.073 | 1.48 | 1.24 | -1    |      |          |                                                   |                |

|    |           |   |   |                      |          |       |       |      |      |       |          |       |       |      |      |       |      |          |                                                 |                |
|----|-----------|---|---|----------------------|----------|-------|-------|------|------|-------|----------|-------|-------|------|------|-------|------|----------|-------------------------------------------------|----------------|
| 4  | 99772678  | G | C | rs78283519           | 4.35E-05 | 0.192 | 0.158 | 1.27 | 1.1  | 1.47  | 9.99E-01 | 0.168 | 0.156 | 1.09 | 0.95 | -1.26 | 1.18 | 3.37E-03 | TSPAN5(dist=192866), EIF4E(dist=26929)          | intergenic     |
| 2  | 103048157 | G | A | rs56331791           | 9.71E-01 | 0.114 | 0.107 | 1.08 | 0.91 | -1.29 | 3.98E-05 | 0.095 | 0.136 | 0.67 | 0.56 | -0.79 | 0.83 | 3.38E-03 | IL18RAP                                         | intronic       |
| 1  | 158521034 | G | A | rs10489834           | 7.20E-06 | 0.435 | 0.369 | 0.76 | 0.68 | -0.85 | 8.55E-01 | 0.395 | 0.403 | 1.03 | 0.93 | -1.15 | 0.88 | 3.38E-03 | OR6Y1(dist=3139), OR6P1(dist=11407)             | intergenic     |
| 16 | 85084016  | C | T | rs8063262            | 9.84E-01 | 0.407 | 0.395 | 0.95 | 0.85 | -1.06 | 3.67E-05 | 0.366 | 0.427 | 1.29 | 1.16 | -1.44 | 1.13 | 3.38E-03 | KIAA0513                                        | intronic       |
| 6  | 29403272  | C | T | rs6908560            | 5.10E-01 | 0.066 | 0.071 | 0.93 | 0.75 | -1.16 | 2.26E-06 | 0.102 | 0.066 | 1.61 | 1.34 | -1.93 | 1.26 | 3.39E-03 | OR11A1(dist=7763), OR10C1(dist=4444)            | intergenic     |
| 2  | 60122310  | C | T | rs10865314           | 9.89E-01 | 0.308 | 0.302 | 0.98 | 0.87 | -1.1  | 2.48E-05 | 0.260 | 0.318 | 1.32 | 1.18 | -1.49 | 1.14 | 3.41E-03 | LOC101927285(dist=615775), MIR4432(dist=492187) | intergenic     |
| 5  | 169154555 | A | T | rs75003416           | 9.17E-01 | 0.042 | 0.039 | 1.08 | 0.82 | -1.43 | 3.42E-05 | 0.025 | 0.048 | 0.50 | 0.36 | -0.69 | 0.73 | 3.41E-03 | DOCK2                                           | intronic       |
| 17 | 33101927  | G | A | rs79691473           | 5.23E-05 | 0.053 | 0.084 | 0.61 | 0.49 | -0.77 | 9.73E-01 | 0.061 | 0.059 | 1.04 | 0.83 | -1.29 | 0.79 | 3.41E-03 | TMEM132E(dist=135585), CCT6B(dist=152951)       | intergenic     |
| 2  | 140219123 | G | A | rs34033127           | 9.64E-01 | 0.490 | 0.483 | 0.97 | 0.87 | -1.08 | 2.28E-05 | 0.530 | 0.469 | 1.28 | 1.15 | -1.42 | 1.13 | 3.42E-03 | YY1P2(dist=562379), LRP1B(dist=769873)          | intergenic     |
| 17 | 33096833  | C | G | rs16970372           | 5.41E-05 | 0.053 | 0.084 | 0.61 | 0.49 | -0.77 | 9.82E-01 | 0.061 | 0.059 | 1.03 | 0.83 | -1.29 | 0.79 | 3.42E-03 | TMEM132E(dist=130491), CCT6B(dist=158045)       | intergenic     |
| 5  | 2920958   | C | G | rs13176860           | 7.92E-01 | 0.388 | 0.395 | 0.97 | 0.87 | -1.09 | 6.31E-05 | 0.360 | 0.405 | 0.82 | 0.74 | -0.92 | 0.88 | 3.42E-03 | C5orf38(dist=165447), LINC01377(dist=256991)    | intergenic     |
| 16 | 85086236  | C | T | rs9936850            | 1.00E+00 | 0.396 | 0.384 | 0.95 | 0.85 | -1.06 | 4.29E-05 | 0.357 | 0.418 | 1.29 | 1.16 | -1.44 | 1.13 | 3.42E-03 | KIAA0513                                        | intronic       |
| 8  | 5386982   | G | A | rs28580814           | 1.31E-05 | 0.023 | 0.047 | 0.46 | 0.33 | -0.64 | 6.91E-01 | 0.033 | 0.029 | 1.12 | 0.83 | -1.5  | 0.71 | 3.42E-03 | CSMD1(dist=534654), LOC100287015(dist=874095)   | intergenic     |
| 3  | 191945739 | T | C | rs76213903           | 7.36E-01 | 0.026 | 0.028 | 0.93 | 0.66 | -1.31 | 9.93E-07 | 0.038 | 0.020 | 1.93 | 1.44 | -2.6  | 1.48 | 3.43E-03 | FGF12                                           | intronic       |
| 7  | 19209526  | G | T | rs12666830           | 9.66E-01 | 0.083 | 0.083 | 1.00 | 0.82 | -1.22 | 2.68E-05 | 0.116 | 0.084 | 1.43 | 1.21 | -1.69 | 1.25 | 3.43E-03 | FERD3L(dist=24482), TWISTNB(dist=525559)        | intergenic     |
| 18 | 31171190  | C | T | rs7236817            | 5.43E-05 | 0.422 | 0.367 | 0.79 | 0.71 | -0.89 | 8.64E-01 | 0.396 | 0.391 | 0.98 | 0.88 | -1.09 | 0.89 | 3.45E-03 | MYOM1                                           | intronic       |
| 7  | 16050528  | C | T | rs76577428           | 3.04E-05 | 0.018 | 0.030 | 0.60 | 0.41 | -0.88 | 8.20E-01 | 0.032 | 0.036 | 0.88 | 0.65 | -1.18 | 0.68 | 3.45E-03 | MEOX2-AS1(dist=314011), ISPD(dist=76624)        | intergenic     |
| 13 | 27719526  | C | T | rs995424             | 3.70E-05 | 0.525 | 0.460 | 1.30 | 1.16 | -1.45 | 8.71E-01 | 0.494 | 0.494 | 1.00 | 0.9  | -1.11 | 1.12 | 3.51E-03 | USP12-AS1                                       | ncRNA_intronic |
| 3  | 104478542 | C | T | rs80341070           | 6.45E-05 | 0.115 | 0.085 | 1.40 | 1.17 | -1.68 | 9.68E-01 | 0.085 | 0.084 | 1.01 | 0.84 | -1.22 | 1.24 | 3.52E-03 | MIR548A3(dist=532437), ALCAM(dist=607015)       | intergenic     |
| 2  | 18477823  | G | A | rs193057233          | 8.46E-01 | 0.189 | 0.192 | 0.98 | 0.86 | -1.13 | 3.49E-05 | 0.211 | 0.171 | 1.29 | 1.13 | -1.47 | 1.20 | 3.53E-03 | KCNK33(dist=363598), RDH14(dist=258166)         | intergenic     |
| 17 | 13575708  | T | C | rs9892382            | 7.61E-01 | 0.473 | 0.470 | 1.01 | 0.9  | -1.13 | 5.63E-05 | 0.485 | 0.441 | 1.19 | 1.08 | -1.33 | 1.13 | 3.54E-03 | HS3ST3A1(dist=70449), CDRT15P1(dist=352107)     | intergenic     |
| 16 | 85085955  | G | A | rs67712391;rs9934770 | 9.99E-01 | 0.396 | 0.384 | 0.95 | 0.85 | -1.06 | 4.49E-05 | 0.357 | 0.418 | 1.29 | 1.16 | -1.44 | 1.13 | 3.54E-03 | KIAA0513                                        | intronic       |
| 8  | 62282228  | G | A | rs75322877           | 8.89E-01 | 0.048 | 0.051 | 0.94 | 0.73 | -1.21 | 1.45E-05 | 0.059 | 0.036 | 1.71 | 1.35 | -2.16 | 1.34 | 3.55E-03 | CLVS1                                           | intronic       |
| 6  | 29408153  | C | T | rs17177639           | 4.47E-01 | 0.065 | 0.070 | 0.92 | 0.74 | -1.15 | 1.99E-06 | 0.101 | 0.065 | 1.62 | 1.35 | -1.94 | 1.26 | 3.55E-03 | OR10C1                                          | exonic         |
| 8  | 66474197  | A | G | rs6472207            | 7.03E-01 | 0.182 | 0.184 | 1.01 | 0.88 | -1.17 | 4.49E-06 | 0.220 | 0.180 | 0.78 | 0.68 | -0.88 | 0.86 | 3.57E-03 | LINC01299                                       | ncRNA_intronic |
| 15 | 75234610  | T | C | rs11072518           | 5.29E-05 | 0.424 | 0.480 | 1.26 | 1.12 | -1.4  | 9.54E-01 | 0.452 | 0.448 | 0.98 | 0.88 | -1.09 | 1.12 | 3.58E-03 | COX5A(dist=4115), RPP25(dist=12833)             | intergenic     |
| 7  | 157993749 | G | T | rs59787925           | 7.42E-01 | 0.365 | 0.356 | 0.96 | 0.86 | -1.08 | 5.61E-05 | 0.359 | 0.409 | 1.24 | 1.11 | -1.38 | 1.15 | 3.59E-03 | PTPRN2                                          | intronic       |
| 3  | 191963699 | T | C | rs112723257          | 7.22E-01 | 0.026 | 0.028 | 0.93 | 0.66 | -1.3  | 9.78E-07 | 0.038 | 0.020 | 1.94 | 1.44 | -2.61 | 1.48 | 3.59E-03 | FGF12-AS1                                       | ncRNA_intronic |
| 17 | 33083349  | A | G | rs16970352           | 5.89E-05 | 0.055 | 0.085 | 0.63 | 0.5  | -0.78 | 9.95E-01 | 0.064 | 0.062 | 1.04 | 0.84 | -1.28 | 0.79 | 3.60E-03 | TMEM132E(dist=117007), CCT6B(dist=171529)       | intergenic     |
| 21 | 46581798  | T | C | rs394608             | 4.03E-05 | 0.517 | 0.459 | 1.26 | 1.13 | -1.41 | 8.64E-01 | 0.500 | 0.500 | 1.00 | 0.9  | -1.11 | 1.13 | 3.63E-03 | ADARB1                                          | intronic       |
| 3  | 124247149 | G | A | rs332414             | 7.47E-01 | 0.102 | 0.094 | 0.92 | 0.77 | -1.11 | 1.27E-05 | 0.134 | 0.107 | 0.78 | 0.66 | -0.91 | 0.82 | 3.65E-03 | KALRN                                           | intronic       |
| 2  | 80298707  | G | A | rs14844465           | 9.18E-01 | 0.085 | 0.080 | 0.93 | 0.77 | -1.14 | 5.90E-05 | 0.093 | 0.070 | 0.73 | 0.61 | -0.88 | 0.78 | 3.66E-03 | CTNNA2                                          | intronic       |
| 4  | 189435070 | G | A | rs10012220           | 1.62E-05 | 0.081 | 0.055 | 1.51 | 1.21 | -1.87 | 6.89E-01 | 0.055 | 0.053 | 1.03 | 0.82 | -1.3  | 1.29 | 3.69E-03 | LINC01060                                       | ncRNA_intronic |
| 6  | 29407955  | C | T | rs17184009           | 4.42E-01 | 0.065 | 0.070 | 0.92 | 0.74 | -1.15 | 2.04E-06 | 0.101 | 0.065 | 1.62 | 1.35 | -1.94 | 1.26 | 3.70E-03 | OR10C1                                          | exonic         |
| 14 | 77147676  | T | C | rs12590782           | 9.49E-01 | 0.133 | 0.132 | 1.01 | 0.86 | -1.18 | 3.51E-05 | 0.150 | 0.118 | 1.32 | 1.13 | -1.53 | 1.19 | 3.70E-03 | ESRRB(dist=179496), VASH1(dist=80559)           | intergenic     |
| 12 | 1625663   | T | C | rs12817716           | 6.29E-01 | 0.062 | 0.054 | 0.87 | 0.69 | -1.09 | 4.90E-06 | 0.038 | 0.069 | 1.91 | 1.47 | -2.47 | 1.30 | 3.70E-03 | LINC00942(dist=12073), FBXL14(dist=49496)       | intergenic     |
| 5  | 86346509  | G | A | rs78855788           | 8.98E-01 | 0.199 | 0.208 | 0.95 | 0.83 | -1.09 | 3.52E-05 | 0.170 | 0.203 | 0.80 | 0.7  | -0.92 | 0.86 | 3.71E-03 | LOC100505878(dist=300920), MIR4280(dist=64187)  | intergenic     |
| 5  | 68303485  | C | T | rs5022687            | 7.74E-01 | 0.489 | 0.480 | 1.04 | 0.93 | -1.16 | 5.15E-05 | 0.529 | 0.465 | 0.77 | 0.7  | -0.86 | 0.89 | 3.75E-03 | LOC101928885                                    | ncRNA_intronic |
| 5  | 68303481  | C | T | rs5022688            | 7.74E-01 | 0.489 | 0.480 | 1.04 | 0.93 | -1.16 | 5.14E-05 | 0.529 | 0.465 | 0.77 | 0.7  | -0.86 | 0.89 | 3.75E-03 | LOC101928885                                    | ncRNA_intronic |
| 3  | 64013417  | G | A | rs35839              | 8.05E-01 | 0.249 | 0.257 | 0.96 | 0.84 | -1.09 | 1.58E-05 | 0.278 | 0.228 | 1.30 | 1.15 | -1.46 | 1.14 | 3.76E-03 | PSMD6(dist=3731), PRICKLE2-AS1(dist=40223)      | intergenic     |
| 3  | 191960452 | A | T | rs10470541           | 9.61E-01 | 0.466 | 0.471 | 0.98 | 0.88 | -1.09 | 4.43E-05 | 0.493 | 0.433 | 1.27 | 1.15 | -1.41 | 1.12 | 3.76E-03 | FGF12-AS1                                       | ncRNA_intronic |
| 16 | 12021332  | G | A | rs256390             | 2.29E-05 | 0.400 | 0.329 | 1.36 | 1.21 | -1.52 | 9.17E-01 | 0.393 | 0.410 | 0.93 | 0.84 | -1.04 | 1.15 | 3.77E-03 | GSPT1(dist=10813), TNFRSF17(dist=37632)         | intergenic     |
| 10 | 50130702  | G | A | rs10776655           | 1.01E-05 | 0.247 | 0.183 | 1.46 | 1.28 | -1.67 | 9.50E-01 | 0.246 | 0.255 | 0.95 | 0.85 | -1.08 | 1.17 | 3.77E-03 | WDFY4                                           | intronic       |
| 14 | 91122214  | A | T | rs745468             | 9.81E-01 | 0.265 | 0.264 | 1.00 | 0.88 | -1.13 | 2.76E-05 | 0.311 | 0.266 | 0.80 | 0.72 | -0.9  | 0.86 | 3.77E-03 | TTC7B                                           | intronic       |
| 10 | 50130781  | C | T | rs10776656           | 1.01E-05 | 0.247 | 0.183 | 1.46 | 1.28 | -1.67 | 9.50E-01 | 0.246 | 0.255 | 0.95 | 0.85 | -1.08 | 1.17 | 3.77E-03 | WDFY4                                           | intronic       |
| 21 | 46582100  | C | T | rs394872             | 4.26E-05 | 0.517 | 0.458 | 1.26 | 1.13 | -1.41 | 8.68E-01 | 0.500 | 0.499 | 1.00 | 0.9  | -1.11 | 1.13 | 3.78E-03 | ADARB1                                          | intronic       |
| 11 | 7810940   | A | T | rs11500778           | 6.41E-01 | 0.236 | 0.246 | 0.95 | 0.83 | -1.08 | 3.57E-06 | 0.290 | 0.248 | 1.24 | 1.1  | -1.39 | 1.19 | 3.78E-03 | OVCH2(dist=82999), OR5P2(dist=6581)             | intergenic     |
| 9  | 80116661  | C | T | rs62571537           | 1.13E-05 | 0.049 | 0.026 | 1.93 | 1.44 | -2.58 | 7.76E-01 | 0.043 | 0.046 | 0.93 | 0.72 | -1.2  | 1.41 | 3.80E-03 | GNA14-AS1                                       | ncRNA_intronic |
| 4  | 141825414 | C | T | rs62345005           | 6.13E-06 | 0.078 | 0.112 | 0.67 | 0.55 | -0.81 | 6.79E-01 | 0.100 | 0.098 | 1.02 | 0.85 | -1.21 | 0.81 | 3.80E-03 | RNF150                                          | intronic       |
| 3  | 143027397 | G | A | rs113194875          | 8.41E-01 | 0.034 | 0.036 | 0.95 | 0.7  | -1.27 | 1.07E-05 | 0.048 | 0.029 | 1.68 | 1.29 | -2.17 | 1.41 | 3.83E-03 | SLC9A9                                          | intronic       |
| 5  | 68303343  | C | T | rs6874327            | 7.80E-01 | 0.490 | 0.480 | 1.04 | 0.93 | -1.16 | 5.22E-05 | 0.529 | 0.465 | 0.77 | 0.7  | -0.86 | 0.89 | 3.84E-03 | LOC101928885                                    | ncRNA_intronic |
| 10 | 50131397  | G | C | rs10745288           | 1.06E-05 | 0.247 | 0.183 | 1.46 | 1.28 | -1.67 | 9.50E-01 | 0.246 | 0.255 | 0.95 | 0.85 | -1.08 | 1.17 | 3.85E-03 | WDFY4                                           | intronic       |
| 1  | 206669465 | C | T | rs3748022            | 6.26E-05 | 0.041 | 0.054 | 0.76 | 0.58 | -0.98 | 8.04E-01 | 0.054 | 0.063 | 0.86 | 0.68 | -1.07 | 0.74 | 3.87E-03 | IKBKE                                           | exonic         |
| 6  | 29415005  | A | G | rs114147387          | 4.79E-01 | 0.067 | 0.071 | 0.93 | 0.75 | -1.15 | 2.25E-06 | 0.101 | 0.065 | 1.61 | 1.34 | -1.93 | 1.25 | 3.89E-03 | OR10C1(dist=6251), OR2H1(dist=11225)            | intergenic     |
| 5  | 37991582  | G | C | rs10941375           | 8.46E-01 | 0.377 | 0.374 | 1.02 | 0.91 | -1.14 | 1.20E-05 | 0.333 | 0.384 | 0.80 | 0.72 | -0.89 | 0.89 | 3.89E-03 | GDNF-AS1(dist=115682), EGFLAM(dist=266929)      | intergenic     |
| 16 | 85084020  | A | G | rs8063125            | 9.95E-01 | 0.400 | 0.387 | 0.95 | 0.85 | -1.06 | 5.00E-05 | 0.360 | 0.420 | 1.29 | 1.16 | -1.43 | 1.13 | 3.90E-03 | KIAA0513                                        | intronic       |
| 8  | 3119845   | T | C | rs7821543            | 8.15E-01 | 0.365 | 0.372 | 1.03 | 0.92 | -1.16 | 1.03E-05 | 0.387 | 0.326 | 0.77 | 0.69 | -0.85 | 0.88 | 3.92E-03 | CSMD1                                           | intronic       |
| 11 | 104957726 | A | C | rs12273474           | 4.       |       |       |      |      |       |          |       |       |      |      |       |      |          |                                                 |                |

|    |           |   |   |                       |          |       |       |      |      |       |          |       |       |      |      |       |      |          |                                                  |                |
|----|-----------|---|---|-----------------------|----------|-------|-------|------|------|-------|----------|-------|-------|------|------|-------|------|----------|--------------------------------------------------|----------------|
| 10 | 97358047  | G | A | rs12259971            | 3.23E-05 | 0.206 | 0.171 | 1.26 | 1.09 | 1.44  | 7.59E-01 | 0.172 | 0.165 | 1.05 | 0.92 | -1.21 | 1.18 | 3.98E-03 | SORBS1(dist=36870), ALDH18A1(dist=7639)          | intergenic     |
| 5  | 118740848 | C | A | rs17386541            | 2.64E-05 | 0.238 | 0.190 | 1.33 | 1.17 | -1.52 | 9.26E-01 | 0.222 | 0.223 | 0.99 | 0.88 | -1.13 | 1.16 | 4.02E-03 | TNFAIP8(dist=10549), HSD17B4(dist=47290)         | intergenic     |
| 12 | 48211782  | A | T | rs7958910             | 4.77E-05 | 0.327 | 0.279 | 1.26 | 1.12 | -1.42 | 9.76E-01 | 0.309 | 0.311 | 0.99 | 0.88 | -1.11 | 1.16 | 4.03E-03 | HDAC7                                            | intronic       |
| 6  | 29415833  | G | A | rs6907565             | 4.96E-01 | 0.067 | 0.072 | 0.93 | 0.75 | -1.15 | 2.81E-06 | 0.101 | 0.065 | 1.61 | 1.34 | -1.93 | 1.25 | 4.05E-03 | OR10C1(dist=7079), OR2H1(dist=10397)             | intergenic     |
| 4  | 14141243  | C | T | rs16889750            | 4.33E-05 | 0.053 | 0.081 | 0.64 | 0.51 | -0.8  | 9.83E-01 | 0.079 | 0.080 | 0.99 | 0.81 | -1.2  | 0.80 | 4.07E-03 | LINC01085                                        | ncRNA_exonic   |
| 7  | 47564745  | C | T | rs334521              | 7.25E-01 | 0.369 | 0.359 | 1.04 | 0.93 | -1.17 | 4.59E-05 | 0.367 | 0.421 | 0.80 | 0.72 | -0.89 | 0.87 | 4.11E-03 | TNS3                                             | intronic       |
| 16 | 85083157  | C | T | rs28538669            | 9.76E-01 | 0.404 | 0.392 | 0.95 | 0.85 | -1.06 | 5.13E-05 | 0.365 | 0.425 | 1.29 | 1.15 | -1.43 | 1.13 | 4.14E-03 | KIAA0513                                         | intronic       |
| 16 | 85083154  | T | C | rs28436679            | 9.76E-01 | 0.404 | 0.392 | 0.95 | 0.85 | -1.06 | 5.13E-05 | 0.365 | 0.425 | 1.29 | 1.15 | -1.43 | 1.13 | 4.14E-03 | KIAA0513                                         | intronic       |
| 16 | 84555072  | G | A | rs114209812           | 9.93E-01 | 0.066 | 0.068 | 0.96 | 0.77 | -1.19 | 1.50E-05 | 0.079 | 0.054 | 1.51 | 1.24 | -1.85 | 1.30 | 4.17E-03 | TLCD1(dist=16784), COTL1(dist=44132)             | intergenic     |
| 2  | 197035827 | C | T | rs1401723             | 9.37E-01 | 0.180 | 0.161 | 1.15 | 0.99 | -1.33 | 5.33E-05 | 0.171 | 0.228 | 0.70 | 0.61 | -0.8  | 0.85 | 4.17E-03 | STK17B                                           | intronic       |
| 16 | 85083398  | G | T | rs11149707            | 9.98E-01 | 0.405 | 0.393 | 0.95 | 0.85 | -1.07 | 5.75E-05 | 0.366 | 0.426 | 1.28 | 1.15 | -1.43 | 1.13 | 4.17E-03 | KIAA0513                                         | intronic       |
| 16 | 85082710  | A | G | rs16975155            | 9.87E-01 | 0.405 | 0.393 | 0.95 | 0.85 | -1.06 | 5.45E-05 | 0.366 | 0.426 | 1.28 | 1.15 | -1.43 | 1.13 | 4.18E-03 | KIAA0513                                         | intronic       |
| 16 | 85082749  | G | A | rs16975157            | 9.86E-01 | 0.405 | 0.393 | 0.95 | 0.85 | -1.06 | 5.45E-05 | 0.366 | 0.426 | 1.28 | 1.15 | -1.43 | 1.13 | 4.19E-03 | KIAA0513                                         | intronic       |
| 16 | 85082960  | A | G | rs66867926            | 9.86E-01 | 0.405 | 0.393 | 0.95 | 0.85 | -1.06 | 5.50E-05 | 0.366 | 0.425 | 1.28 | 1.15 | -1.43 | 1.13 | 4.20E-03 | KIAA0513                                         | intronic       |
| 16 | 85082890  | A | G | rs35237475            | 9.86E-01 | 0.405 | 0.393 | 0.95 | 0.85 | -1.06 | 5.48E-05 | 0.366 | 0.425 | 1.28 | 1.15 | -1.43 | 1.13 | 4.20E-03 | KIAA0513                                         | intronic       |
| 16 | 85082972  | G | A | rs62048459            | 9.86E-01 | 0.405 | 0.393 | 0.95 | 0.85 | -1.06 | 5.50E-05 | 0.366 | 0.425 | 1.28 | 1.15 | -1.43 | 1.13 | 4.20E-03 | KIAA0513                                         | intronic       |
| 5  | 86349055  | A | G | rs75566272            | 9.25E-01 | 0.199 | 0.208 | 0.95 | 0.83 | -1.09 | 3.91E-05 | 0.170 | 0.203 | 0.80 | 0.7  | -0.92 | 0.86 | 4.23E-03 | LOC100505878(dist=303466), MIR4280(dist=61641)   | intergenic     |
| 16 | 85082912  | C | T | rs16975159            | 9.82E-01 | 0.405 | 0.393 | 0.95 | 0.85 | -1.06 | 5.49E-05 | 0.366 | 0.426 | 1.28 | 1.15 | -1.43 | 1.13 | 4.25E-03 | KIAA0513                                         | intronic       |
| 11 | 7835743   | G | A | rs111479812           | 7.03E-01 | 0.295 | 0.271 | 1.12 | 1    | -1.27 | 1.08E-05 | 0.254 | 0.323 | 0.71 | 0.63 | -0.8  | 0.88 | 4.26E-03 | OR5P2(dist=17254), OR5P3(dist=10841)             | intergenic     |
| 3  | 191961313 | C | T | rs112140525           | 7.82E-01 | 0.027 | 0.029 | 0.94 | 0.67 | -1.31 | 2.68E-06 | 0.039 | 0.021 | 1.87 | 1.4  | -2.51 | 1.46 | 4.26E-03 | FGF12-AS1                                        | ncRNA_intronic |
| 5  | 37982876  | G | C | rs386687316;rs6896489 | 9.67E-01 | 0.439 | 0.442 | 0.99 | 0.88 | -1.1  | 3.49E-05 | 0.385 | 0.429 | 0.84 | 0.75 | -0.93 | 0.89 | 4.27E-03 | GDNF-AS1(dist=106976), EGFLAM(dist=275635)       | intergenic     |
| 19 | 36824200  | A | G | rs77351039            | 9.25E-01 | 0.082 | 0.088 | 0.93 | 0.76 | -1.13 | 1.89E-05 | 0.104 | 0.073 | 1.48 | 1.24 | -1.76 | 1.25 | 4.28E-03 | LINC00665(dist=1580), ZFP14(dist=1155)           | intergenic     |
| 5  | 37978292  | A | G | rs1963641             | 9.38E-01 | 0.440 | 0.439 | 1.00 | 0.9  | -1.12 | 2.25E-05 | 0.395 | 0.443 | 0.82 | 0.74 | -0.91 | 0.89 | 4.28E-03 | GDNF-AS1(dist=102392), EGFLAM(dist=280219)       | intergenic     |
| 16 | 85083132  | C | T | rs28449531            | 9.76E-01 | 0.404 | 0.392 | 0.95 | 0.85 | -1.06 | 5.47E-05 | 0.365 | 0.425 | 1.28 | 1.15 | -1.43 | 1.13 | 4.29E-03 | KIAA0513                                         | intronic       |
| 13 | 33872289  | T | C | rs7998857             | 9.56E-01 | 0.214 | 0.221 | 1.04 | 0.91 | -1.19 | 5.08E-05 | 0.247 | 0.205 | 0.78 | 0.69 | -0.89 | 0.84 | 4.29E-03 | STARD13                                          | intronic       |
| 16 | 85083125  | T | C | rs28459643            | 9.75E-01 | 0.404 | 0.392 | 0.95 | 0.85 | -1.06 | 5.47E-05 | 0.365 | 0.425 | 1.28 | 1.15 | -1.43 | 1.13 | 4.29E-03 | KIAA0513                                         | intronic       |
| 5  | 68303071  | C | T | rs4976068             | 8.06E-01 | 0.490 | 0.480 | 1.04 | 0.93 | -1.16 | 5.55E-05 | 0.529 | 0.466 | 0.78 | 0.7  | -0.86 | 0.89 | 4.29E-03 | LOC101928885                                     | ncRNA_intronic |
| 5  | 86369216  | C | G | rs3773205             | 9.17E-01 | 0.198 | 0.207 | 0.95 | 0.83 | -1.09 | 3.93E-05 | 0.166 | 0.199 | 0.80 | 0.7  | -0.92 | 0.86 | 4.30E-03 | LOC100505878(dist=323627), MIR4280(dist=41480)   | intergenic     |
| 16 | 85083055  | A | T | rs28403503            | 9.69E-01 | 0.404 | 0.392 | 0.95 | 0.85 | -1.06 | 5.36E-05 | 0.365 | 0.425 | 1.28 | 1.15 | -1.43 | 1.13 | 4.31E-03 | KIAA0513                                         | intronic       |
| 6  | 29328392  | C | T | rs2207698             | 3.70E-05 | 0.016 | 0.034 | 0.47 | 0.32 | -0.69 | 9.05E-01 | 0.029 | 0.028 | 1.04 | 0.76 | -1.42 | 0.68 | 4.31E-03 | OR5V1(dist=4338), OR12D3(dist=12808)             | intergenic     |
| 11 | 113973394 | C | T | rs73000959            | 1.66E-05 | 0.233 | 0.200 | 1.22 | 1.07 | -1.39 | 8.91E-01 | 0.208 | 0.202 | 1.03 | 0.91 | -1.17 | 1.17 | 4.32E-03 | ZBTB16                                           | intronic       |
| 17 | 73835281  | C | T | rs12603812            | 9.06E-01 | 0.234 | 0.216 | 0.90 | 0.79 | -1.03 | 4.15E-05 | 0.276 | 0.252 | 0.88 | 0.79 | -0.99 | 0.86 | 4.32E-03 | UNC13D                                           | intronic       |
| 8  | 5385594   | G | C | rs28406137            | 2.04E-05 | 0.022 | 0.047 | 0.47 | 0.34 | -0.65 | 6.89E-01 | 0.032 | 0.029 | 1.12 | 0.83 | -1.51 | 0.72 | 4.33E-03 | CSMD1(dist=533266), LOC100287015(dist=875483)    | intergenic     |
| 5  | 37981862  | C | T | rs9292684             | 9.94E-01 | 0.446 | 0.446 | 1.00 | 0.9  | -1.12 | 3.05E-05 | 0.400 | 0.447 | 0.82 | 0.74 | -0.92 | 0.89 | 4.34E-03 | GDNF-AS1(dist=105962), EGFLAM(dist=276649)       | intergenic     |
| 9  | 44248033  | C | G | rs73443672            | 9.76E-01 | 0.084 | 0.087 | 0.97 | 0.8  | -1.18 | 2.97E-05 | 0.094 | 0.070 | 1.38 | 1.15 | -1.66 | 1.31 | 4.35E-03 | CNTNAP3B(dist=325560), LOC101927827(dist=136552) | intergenic     |
| 5  | 117747565 | A | C | rs61484922            | 9.00E-01 | 0.089 | 0.096 | 0.92 | 0.76 | -1.11 | 7.56E-06 | 0.102 | 0.069 | 1.53 | 1.28 | -1.83 | 1.24 | 4.37E-03 | LOC101927280                                     | ncRNA_intronic |
| 15 | 101475243 | C | T | rs73482810            | 1.03E-05 | 0.157 | 0.211 | 0.69 | 0.6  | -0.8  | 6.60E-01 | 0.180 | 0.167 | 1.09 | 0.95 | -1.25 | 0.86 | 4.39E-03 | LRRK1                                            | intronic       |
| 5  | 65446273  | G | T | rs12523007            | 5.45E-01 | 0.085 | 0.078 | 1.10 | 0.9  | -1.34 | 5.98E-06 | 0.063 | 0.097 | 0.63 | 0.51 | -0.77 | 0.81 | 4.39E-03 | SREK1                                            | intronic       |
| 14 | 94370351  | A | T | rs4900204             | 8.73E-01 | 0.067 | 0.064 | 0.95 | 0.76 | -1.19 | 6.10E-05 | 0.086 | 0.064 | 0.73 | 0.6  | -0.89 | 0.78 | 4.40E-03 | FAM181A-AS1                                      | downstream     |
| 1  | 21344145  | A | G | rs6697563             | 4.05E-05 | 0.360 | 0.310 | 1.25 | 1.11 | -1.4  | 9.03E-01 | 0.347 | 0.349 | 0.99 | 0.89 | -1.11 | 1.14 | 4.41E-03 | EIF4G3                                           | intronic       |
| 1  | 158520414 | A | G | rs9804005             | 1.62E-05 | 0.429 | 0.363 | 0.76 | 0.68 | -0.85 | 8.51E-01 | 0.383 | 0.391 | 1.04 | 0.93 | -1.15 | 0.89 | 4.43E-03 | OR6Y1(dist=2519), OR6P1(dist=12027)              | intergenic     |
| 19 | 36831950  | C | G | rs75480801            | 9.13E-01 | 0.083 | 0.088 | 0.93 | 0.76 | -1.13 | 1.91E-05 | 0.104 | 0.073 | 1.48 | 1.24 | -1.76 | 1.24 | 4.44E-03 | ZFP14                                            | exonic         |
| 16 | 85081477  | C | G | rs3803637             | 9.70E-01 | 0.410 | 0.398 | 0.95 | 0.85 | -1.07 | 5.67E-05 | 0.369 | 0.428 | 1.28 | 1.15 | -1.43 | 1.13 | 4.44E-03 | KIAA0513                                         | intronic       |
| 8  | 49981091  | C | T | rs2137013             | 5.69E-05 | 0.324 | 0.367 | 0.83 | 0.74 | -0.93 | 9.59E-01 | 0.349 | 0.360 | 0.96 | 0.86 | -1.07 | 0.89 | 4.45E-03 | C8orf22                                          | intronic       |
| 8  | 5384957   | A | C | rs28512288            | 2.21E-05 | 0.022 | 0.047 | 0.47 | 0.34 | -0.65 | 6.94E-01 | 0.032 | 0.029 | 1.12 | 0.83 | -1.51 | 0.72 | 4.46E-03 | CSMD1(dist=532629), LOC100287015(dist=876120)    | intergenic     |
| 5  | 68304658  | C | A | rs4563578             | 8.67E-01 | 0.503 | 0.491 | 1.05 | 0.94 | -1.17 | 4.09E-05 | 0.513 | 0.449 | 0.77 | 0.7  | -0.86 | 0.89 | 4.47E-03 | LOC101928885                                     | ncRNA_intronic |
| 1  | 61806984  | A | G | rs9436206             | 9.50E-01 | 0.056 | 0.053 | 1.06 | 0.83 | -1.34 | 3.75E-05 | 0.072 | 0.052 | 1.42 | 1.15 | -1.75 | 1.32 | 4.48E-03 | NFIA                                             | intronic       |
| 6  | 29413573  | G | T | rs114917638           | 4.72E-01 | 0.066 | 0.071 | 0.93 | 0.74 | -1.15 | 2.89E-06 | 0.101 | 0.065 | 1.60 | 1.34 | -1.92 | 1.25 | 4.48E-03 | OR10C1(dist=4819), OR2H1(dist=12657)             | intergenic     |
| 6  | 29412864  | A | G | rs142389383           | 4.73E-01 | 0.066 | 0.071 | 0.93 | 0.74 | -1.15 | 2.90E-06 | 0.101 | 0.065 | 1.60 | 1.34 | -1.92 | 1.25 | 4.49E-03 | OR10C1(dist=4110), OR2H1(dist=13366)             | intergenic     |
| 11 | 17417337  | C | T | rs8192691             | 6.93E-01 | 0.026 | 0.025 | 1.04 | 0.73 | -1.47 | 1.74E-05 | 0.047 | 0.033 | 1.45 | 1.12 | -1.88 | 1.48 | 4.52E-03 | ABCC8                                            | intronic       |
| 2  | 60153321  | C | G | rs6751255             | 9.79E-01 | 0.311 | 0.308 | 0.99 | 0.88 | -1.11 | 4.50E-05 | 0.276 | 0.329 | 1.29 | 1.15 | -1.44 | 1.13 | 4.58E-03 | LOC101927285(dist=646786), MIR4432(dist=461176)  | intergenic     |
| 6  | 29411578  | C | T | rs16894915            | 4.74E-01 | 0.066 | 0.071 | 0.93 | 0.75 | -1.15 | 3.05E-06 | 0.101 | 0.065 | 1.60 | 1.34 | -1.92 | 1.25 | 4.58E-03 | OR10C1(dist=2824), OR2H1(dist=14652)             | intergenic     |
| 15 | 61034496  | T | G | rs7168905             | 8.28E-01 | 0.114 | 0.101 | 1.15 | 0.97 | -1.38 | 4.62E-05 | 0.147 | 0.130 | 1.16 | 1    | -1.34 | 1.21 | 4.59E-03 | RORA                                             | intronic       |
| 2  | 40465195  | T | A | rs1627626             | 2.02E-05 | 0.425 | 0.374 | 0.81 | 0.72 | -0.9  | 8.53E-01 | 0.402 | 0.402 | 1.00 | 0.9  | -1.11 | 0.88 | 4.60E-03 | SLC8A1-AS1                                       | ncRNA_intronic |
| 4  | 85392995  | G | A | rs12642612            | 9.41E-01 | 0.368 | 0.372 | 0.98 | 0.88 | -1.1  | 6.24E-05 | 0.402 | 0.348 | 1.26 | 1.13 | -1.4  | 1.12 | 4.65E-03 | LOC101928978(dist=172673), NKX6-1(dist=21441)    | intergenic     |
| 10 | 51519516  | A | G | rs2611486             | 3.34E-05 | 0.248 | 0.188 | 1.42 | 1.25 | -1.62 | 7.32E-01 | 0.226 | 0.231 | 0.97 | 0.86 | -1.1  | 1.16 | 4.66E-03 | TIMM23B                                          | intronic       |
| 15 | 77682375  | A | G | rs145302438           | 6.61E-01 | 0.018 | 0.021 | 0.88 | 0.59 | -1.31 | 2.60E-05 | 0.041 | 0.023 | 1.77 | 1.33 | -2.35 | 1.47 | 4.66E-03 | PEAK1                                            | intronic       |
| 15 | 77694171  | C | T |                       |          |       |       |      |      |       |          |       |       |      |      |       |      |          |                                                  |                |



|    |           |   |   |             |          |       |       |      |      |       |          |       |       |      |      |       |      |          |                                                   |                |
|----|-----------|---|---|-------------|----------|-------|-------|------|------|-------|----------|-------|-------|------|------|-------|------|----------|---------------------------------------------------|----------------|
| 14 | 56248455  | G | A | rs4144657   | 8.97E-01 | 0.088 | 0.091 | 0.96 | 0.79 | -1.16 | 2.35E-05 | 0.067 | 0.090 | 0.73 | 0.59 | -0.89 | 0.79 | 4.72E-03 | LINC00520                                         | ncRNA_exonic   |
| 10 | 51518688  | A | C | rs2843546   | 3.53E-05 | 0.249 | 0.189 | 1.42 | 1.25 | -1.62 | 7.29E-01 | 0.227 | 0.232 | 0.97 | 0.86 | -1.1  | 1.16 | 4.73E-03 | TIMM23B                                           | intronic       |
| 8  | 89298829  | A | C | rs57136992  | 8.19E-01 | 0.122 | 0.126 | 0.96 | 0.82 | -1.14 | 1.75E-05 | 0.091 | 0.120 | 0.73 | 0.61 | -0.87 | 0.84 | 4.73E-03 | MMP16                                             | intronic       |
| 4  | 122565372 | C | T | rs13131447  | 6.78E-01 | 0.258 | 0.250 | 1.04 | 0.92 | -1.18 | 1.20E-05 | 0.293 | 0.275 | 0.76 | 0.67 | -0.86 | 0.87 | 4.73E-03 | QRFRP(dist=263191), ANXA5(dist=23780)             | intergenic     |
| 5  | 86369563  | C | T | rs55928768  | 9.23E-01 | 0.199 | 0.207 | 0.95 | 0.83 | -1.09 | 4.84E-05 | 0.171 | 0.203 | 0.81 | 0.7  | -0.93 | 0.86 | 4.77E-03 | LOC100505878(dist=323974), MIR4280(dist=41133)    | intergenic     |
| 8  | 89282661  | A | C | rs16880535  | 6.57E-01 | 0.120 | 0.124 | 0.96 | 0.81 | -1.13 | 2.25E-05 | 0.089 | 0.118 | 0.73 | 0.61 | -0.87 | 0.84 | 4.77E-03 | MMP16                                             | intronic       |
| 2  | 180501037 | T | A | rs11901866  | 6.28E-05 | 0.081 | 0.045 | 1.86 | 1.48 | -2.33 | 8.97E-01 | 0.065 | 0.070 | 0.93 | 0.75 | -1.14 | 1.27 | 4.78E-03 | ZNF385B                                           | intronic       |
| 6  | 29411249  | G | T | rs115116585 | 4.57E-01 | 0.066 | 0.071 | 0.92 | 0.74 | -1.15 | 3.05E-06 | 0.101 | 0.065 | 1.61 | 1.34 | -1.93 | 1.25 | 4.80E-03 | OR10C1(dist=2495), OR2H1(dist=14981)              | intergenic     |
| 4  | 14158633  | A | G | rs17346022  | 3.55E-05 | 0.059 | 0.086 | 0.67 | 0.53 | -0.83 | 9.68E-01 | 0.087 | 0.088 | 0.98 | 0.82 | -1.18 | 0.81 | 4.80E-03 | LINC01085(dist=16957), LINC00504(dist=313457)     | intergenic     |
| 16 | 85083741  | A | G | rs12597543  | 8.31E-01 | 0.385 | 0.370 | 0.94 | 0.84 | -1.05 | 3.55E-05 | 0.351 | 0.412 | 1.30 | 1.17 | -1.45 | 1.13 | 4.81E-03 | KIAA0513                                          | intronic       |
| 2  | 180511629 | T | C | rs6743733   | 2.57E-05 | 0.078 | 0.043 | 1.85 | 1.47 | -2.34 | 9.42E-01 | 0.071 | 0.076 | 0.93 | 0.76 | -1.14 | 1.28 | 4.83E-03 | ZNF385B                                           | intronic       |
| 11 | 7879794   | T | C | rs16933012  | 7.35E-01 | 0.188 | 0.189 | 0.99 | 0.86 | -1.14 | 5.32E-06 | 0.144 | 0.179 | 0.77 | 0.67 | -0.89 | 0.86 | 4.83E-03 | LOC283299                                         | ncRNA_intronic |
| 15 | 77670803  | C | T | rs116476587 | 6.46E-01 | 0.019 | 0.022 | 0.88 | 0.59 | -1.29 | 2.41E-05 | 0.041 | 0.023 | 1.78 | 1.34 | -2.36 | 1.47 | 4.84E-03 | PEAK1                                             | intronic       |
| 15 | 77632140  | C | A | rs142228963 | 6.46E-01 | 0.019 | 0.022 | 0.88 | 0.59 | -1.29 | 2.41E-05 | 0.041 | 0.023 | 1.78 | 1.34 | -2.36 | 1.47 | 4.85E-03 | PEAK1                                             | intronic       |
| 2  | 224781994 | A | G | rs73994436  | 4.59E-05 | 0.045 | 0.026 | 1.77 | 1.31 | -2.39 | 7.02E-01 | 0.029 | 0.029 | 1.00 | 0.73 | -1.36 | 1.43 | 4.85E-03 | WDFY1                                             | intronic       |
| 15 | 77624517  | T | C | rs146224919 | 6.45E-01 | 0.019 | 0.022 | 0.88 | 0.59 | -1.29 | 2.41E-05 | 0.041 | 0.023 | 1.78 | 1.34 | -2.36 | 1.47 | 4.86E-03 | PEAK1                                             | intronic       |
| 15 | 77613233  | T | C | rs139425312 | 6.45E-01 | 0.019 | 0.022 | 0.88 | 0.59 | -1.29 | 2.41E-05 | 0.041 | 0.023 | 1.78 | 1.34 | -2.36 | 1.47 | 4.86E-03 | PEAK1                                             | intronic       |
| 21 | 25483596  | C | T | rs1783342   | 6.45E-01 | 0.040 | 0.043 | 0.93 | 0.71 | -1.22 | 3.35E-06 | 0.053 | 0.032 | 1.72 | 1.34 | -2.21 | 1.36 | 4.88E-03 | D21S2088E(dist=726440), LOC101927869(dist=193267) | intergenic     |
| 8  | 89285456  | G | C | rs147849836 | 8.53E-01 | 0.120 | 0.124 | 0.96 | 0.81 | -1.14 | 2.29E-05 | 0.089 | 0.118 | 0.73 | 0.61 | -0.88 | 0.84 | 4.90E-03 | MMP16                                             | intronic       |
| 21 | 25482931  | T | C | rs1783341   | 6.44E-01 | 0.040 | 0.043 | 0.93 | 0.71 | -1.22 | 3.34E-06 | 0.053 | 0.032 | 1.72 | 1.34 | -2.21 | 1.36 | 4.90E-03 | D21S2088E(dist=725775), LOC101927869(dist=193932) | intergenic     |
| 21 | 25482893  | T | C | rs1783340   | 6.44E-01 | 0.040 | 0.043 | 0.93 | 0.71 | -1.22 | 3.34E-06 | 0.053 | 0.032 | 1.72 | 1.34 | -2.21 | 1.36 | 4.90E-03 | D21S2088E(dist=725737), LOC101927869(dist=193970) | intergenic     |
| 2  | 60122951  | C | T | rs2042559   | 9.10E-01 | 0.307 | 0.300 | 0.97 | 0.86 | -1.09 | 3.40E-05 | 0.261 | 0.317 | 1.32 | 1.17 | -1.48 | 1.13 | 4.91E-03 | LOC101927285(dist=616416), MIR4432(dist=491546)   | intergenic     |
| 16 | 85083839  | G | C | rs8063208   | 8.93E-01 | 0.415 | 0.404 | 0.95 | 0.85 | -1.07 | 4.82E-05 | 0.371 | 0.431 | 1.28 | 1.15 | -1.43 | 1.13 | 4.91E-03 | KIAA0513                                          | intronic       |
| 10 | 97354958  | T | C | rs7900149   | 1.85E-05 | 0.226 | 0.186 | 1.27 | 1.11 | -1.46 | 9.83E-01 | 0.184 | 0.178 | 1.04 | 0.91 | -1.19 | 1.16 | 4.92E-03 | SORBS1(dist=33781), ALDH18A1(dist=10728)          | intergenic     |
| 15 | 77716473  | G | C | rs114547308 | 6.57E-01 | 0.018 | 0.021 | 0.88 | 0.59 | -1.31 | 2.86E-05 | 0.041 | 0.023 | 1.77 | 1.33 | -2.35 | 1.47 | 4.93E-03 | HMG20A                                            | intronic       |
| 15 | 77707628  | C | T | rs141101751 | 6.57E-01 | 0.018 | 0.021 | 0.88 | 0.59 | -1.31 | 2.86E-05 | 0.041 | 0.023 | 1.77 | 1.33 | -2.35 | 1.47 | 4.93E-03 | PEAK1                                             | intronic       |
| 15 | 77648864  | T | C | rs75394783  | 6.41E-01 | 0.019 | 0.022 | 0.88 | 0.59 | -1.29 | 2.44E-05 | 0.041 | 0.024 | 1.77 | 1.34 | -2.35 | 1.46 | 4.94E-03 | PEAK1                                             | intronic       |
| 6  | 5455161   | T | C | rs2791458   | 8.97E-01 | 0.091 | 0.088 | 0.96 | 0.79 | -1.16 | 6.43E-05 | 0.123 | 0.100 | 0.79 | 0.67 | -0.93 | 0.81 | 4.98E-03 | LOC101927972                                      | ncRNA_intronic |
| 1  | 240277956 | C | G | rs10926127  | 6.22E-05 | 0.119 | 0.142 | 0.81 | 0.69 | -0.96 | 8.23E-01 | 0.153 | 0.169 | 0.89 | 0.77 | -1.02 | 0.85 | 4.99E-03 | FMN2                                              | intronic       |
| 8  | 89291085  | G | C | rs11986608  | 8.56E-01 | 0.120 | 0.124 | 0.96 | 0.81 | -1.13 | 2.40E-05 | 0.089 | 0.118 | 0.73 | 0.61 | -0.88 | 0.84 | 5.01E-03 | MMP16                                             | intronic       |
| 6  | 130542171 | T | C | rs6569666   | 5.22E-05 | 0.232 | 0.271 | 0.81 | 0.71 | -0.92 | 9.70E-01 | 0.255 | 0.258 | 0.98 | 0.87 | -1.11 | 0.86 | 5.01E-03 | SAMD3                                             | intronic       |
| 1  | 61808086  | C | T | rs9436635   | 7.63E-01 | 0.085 | 0.086 | 0.98 | 0.81 | -1.2  | 2.43E-05 | 0.113 | 0.083 | 1.40 | 1.18 | -1.67 | 1.22 | 5.04E-03 | NFIA                                              | intronic       |
| 15 | 77730400  | G | A | rs141416811 | 6.63E-01 | 0.018 | 0.021 | 0.88 | 0.59 | -1.31 | 3.11E-05 | 0.041 | 0.023 | 1.77 | 1.33 | -2.35 | 1.46 | 5.04E-03 | HMG20A                                            | intronic       |
| 11 | 8546365   | A | C | rs7119274   | 6.66E-01 | 0.294 | 0.307 | 0.94 | 0.83 | -1.06 | 9.61E-06 | 0.318 | 0.264 | 1.30 | 1.16 | -1.46 | 1.13 | 5.07E-03 | STK33                                             | intronic       |
| 8  | 3121242   | C | G | rs7010968   | 9.72E-01 | 0.479 | 0.486 | 1.03 | 0.92 | -1.15 | 4.37E-05 | 0.499 | 0.434 | 0.77 | 0.69 | -0.85 | 0.89 | 5.07E-03 | CSMD1                                             | intronic       |
| 14 | 62730285  | C | A | rs4899069   | 7.16E-01 | 0.373 | 0.387 | 1.06 | 0.95 | -1.19 | 2.54E-05 | 0.399 | 0.339 | 0.77 | 0.69 | -0.86 | 0.89 | 5.14E-03 | LINC00644(dist=123594), KCNH5(dist=443006)        | intergenic     |
| 10 | 97349758  | C | T | rs7915910   | 2.45E-05 | 0.226 | 0.187 | 1.27 | 1.11 | -1.45 | 9.55E-01 | 0.184 | 0.179 | 1.04 | 0.91 | -1.19 | 1.16 | 5.17E-03 | SORBS1(dist=28581), ALDH18A1(dist=15928)          | intergenic     |
| 8  | 32574651  | G | A | rs2976526   | 9.98E-01 | 0.039 | 0.037 | 0.96 | 0.72 | -1.28 | 4.23E-05 | 0.055 | 0.035 | 0.63 | 0.5  | -0.8  | 0.73 | 5.18E-03 | NRG1                                              | intronic       |
| 21 | 25481225  | A | G | rs8126510   | 6.42E-01 | 0.040 | 0.043 | 1.08 | 0.82 | -1.41 | 3.88E-06 | 0.054 | 0.032 | 0.58 | 0.45 | -0.75 | 0.74 | 5.19E-03 | D21S2088E(dist=724069), LOC101927869(dist=195638) | intergenic     |
| 21 | 25482266  | G | A | rs79720228  | 6.43E-01 | 0.040 | 0.043 | 0.93 | 0.71 | -1.22 | 3.90E-06 | 0.054 | 0.032 | 1.72 | 1.34 | -2.22 | 1.36 | 5.19E-03 | D21S2088E(dist=725110), LOC101927869(dist=194597) | intergenic     |
| 21 | 25475526  | T | C | rs1783328   | 6.22E-01 | 0.040 | 0.043 | 0.92 | 0.7  | -1.22 | 3.43E-06 | 0.053 | 0.032 | 1.73 | 1.35 | -2.22 | 1.35 | 5.20E-03 | D21S2088E(dist=718370), LOC101927869(dist=201337) | intergenic     |
| 12 | 12254075  | C | T | rs2448032   | 8.08E-01 | 0.219 | 0.204 | 1.09 | 0.96 | -1.25 | 6.23E-05 | 0.202 | 0.258 | 0.73 | 0.64 | -0.83 | 0.86 | 5.21E-03 | BCL2L14(dist=1448), MIR1244-4(dist=10811)         | intergenic     |
| 5  | 34616358  | T | G | rs256311    | 9.71E-01 | 0.419 | 0.410 | 1.04 | 0.93 | -1.16 | 4.45E-05 | 0.469 | 0.425 | 1.20 | 1.08 | -1.33 | 1.12 | 5.24E-03 | C1QTNF3-AMACR(dist=491725), RAI14(dist=40075)     | intergenic     |
| 8  | 5387864   | C | T | rs28416345  | 2.38E-05 | 0.022 | 0.046 | 0.47 | 0.34 | -0.65 | 6.63E-01 | 0.032 | 0.029 | 1.12 | 0.83 | -1.51 | 0.72 | 5.25E-03 | CSMD1(dist=535536), LOC100287015(dist=873213)     | intergenic     |
| 6  | 32454652  | C | T | rs113888165 | 1.17E-05 | 0.401 | 0.439 | 0.85 | 0.76 | -0.95 | 4.00E-03 | 0.417 | 0.450 | 0.88 | 0.79 | -0.97 | 0.81 | 5.29E-03 | HLA-DRA(dist=41826), HLA-DRB5(dist=30502)         | intergenic     |
| 5  | 37999777  | A | T | rs1508840   | 7.56E-01 | 0.380 | 0.375 | 1.02 | 0.91 | -1.14 | 1.28E-05 | 0.332 | 0.383 | 0.80 | 0.72 | -0.9  | 0.89 | 5.30E-03 | GDNF-AS1(dist=123877), EGLAM(dist=258734)         | intergenic     |
| 14 | 105081957 | G | C | rs6576054   | 7.68E-01 | 0.136 | 0.138 | 1.02 | 0.87 | -1.19 | 3.53E-05 | 0.164 | 0.126 | 0.74 | 0.64 | -0.85 | 0.85 | 5.31E-03 | TMEM179(dist=10860), MIR4710(dist=62074)          | intergenic     |
| 1  | 61802286  | T | C | rs12066006  | 7.32E-01 | 0.079 | 0.080 | 0.98 | 0.8  | -1.2  | 1.99E-05 | 0.107 | 0.079 | 1.40 | 1.17 | -1.66 | 1.23 | 5.31E-03 | NFIA                                              | intronic       |
| 21 | 25478260  | C | T | rs1910636   | 6.35E-01 | 0.041 | 0.044 | 0.93 | 0.71 | -1.22 | 3.78E-06 | 0.054 | 0.032 | 1.72 | 1.34 | -2.2  | 1.35 | 5.35E-03 | D21S2088E(dist=721104), LOC101927869(dist=198603) | intergenic     |
| 3  | 143067049 | C | A | rs142097046 | 9.86E-01 | 0.041 | 0.042 | 0.96 | 0.73 | -1.26 | 3.57E-05 | 0.055 | 0.036 | 1.57 | 1.23 | -2    | 1.35 | 5.36E-03 | SLC9A9                                            | intronic       |
| 7  | 113541607 | T | C | rs12673425  | 7.78E-01 | 0.360 | 0.367 | 0.97 | 0.87 | -1.09 | 1.42E-05 | 0.315 | 0.357 | 0.83 | 0.74 | -0.92 | 0.89 | 5.39E-03 | PPP1R3A                                           | intronic       |
| 21 | 25450911  | C | T | rs1783313   | 6.19E-01 | 0.040 | 0.043 | 0.93 | 0.71 | -1.22 | 4.72E-06 | 0.053 | 0.031 | 1.74 | 1.35 | -2.22 | 1.35 | 5.41E-03 | D21S2088E(dist=693755), LOC101927869(dist=225952) | intergenic     |
| 11 | 124137934 | C | G | rs7130169   | 9.04E-01 | 0.272 | 0.271 | 1.01 | 0.89 | -1.14 | 5.72E-05 | 0.306 | 0.263 | 1.24 | 1.1  | -1.39 | 1.13 | 5.45E-03 | OR8G5(dist=2171), OR8D1(dist=41802)               | intergenic     |
| 1  | 61808444  | A | G | rs4915735   | 7.79E-01 | 0.085 | 0.087 | 1.01 | 0.83 | -1.23 | 3.18E-05 | 0.113 | 0.084 | 0.72 | 0.61 | -0.85 | 0.82 | 5.48E-03 | NFIA                                              | intronic       |
| 21 | 25458142  | C | T | rs1699713   | 6.00E-01 | 0.040 | 0.043 | 0.92 | 0.7  | -1.22 | 3.64E-06 | 0.053 | 0.031 | 1.74 | 1.36 | -2.23 | 1.35 | 5.48E-03 | D21S2088E(dist=700986), LOC101927869(dist=218721) | intergenic     |
| 16 | 85083763  | A | G | rs12597553  | 8.66E-01 | 0.418 | 0.405 | 0.95 | 0.85 | -1.06 | 5.15E-05 | 0.377 | 0.436 | 1.28 | 1.15 | -1.42 | 1.13 | 5.48E-03 | KIAA0513                                          | intronic       |
| 8  | 89316955  | T | A | rs11994310  | 7.93E-01 | 0.123 | 0.127 | 0.97 | 0.82 | -1.14 | 1.76E-05 | 0.090 | 0.119 | 0.73 | 0.61 | -0.88 | 0.84 | 5.51E-03 | MMP                                               |                |

|    |           |   |   |             |          |       |       |      |      |       |          |       |       |      |      |       |      |          |                                                    |                |
|----|-----------|---|---|-------------|----------|-------|-------|------|------|-------|----------|-------|-------|------|------|-------|------|----------|----------------------------------------------------|----------------|
| 1  | 12187712  | A | G | rs497426    | 8.43E-01 | 0.386 | 0.367 | 0.92 | 0.82 | -1.03 | 3.19E-05 | 0.463 | 0.433 | 0.89 | 0.8  | -0.98 | 0.88 | 5.73E-03 | TNFRSF8                                            | intronic       |
| 8  | 5959900   | A | G | rs74478569  | 6.60E-01 | 0.174 | 0.187 | 0.92 | 0.79 | -1.06 | 2.44E-06 | 0.210 | 0.161 | 1.38 | 1.21 | -1.58 | 1.16 | 5.76E-03 | CSMD1(dist=1107572), LOC100287015(dist=301177)     | intergenic     |
| 21 | 25455847  | A | T | rs1783317   | 6.19E-01 | 0.040 | 0.043 | 0.93 | 0.71 | -1.22 | 5.35E-06 | 0.053 | 0.032 | 1.73 | 1.35 | -2.21 | 1.34 | 5.77E-03 | D21S2088E(dist=698691), LOC101927869(dist=221016)  | intergenic     |
| 11 | 124116898 | A | C | rs10790658  | 8.18E-01 | 0.305 | 0.306 | 0.99 | 0.88 | -1.12 | 4.86E-05 | 0.348 | 0.301 | 1.24 | 1.11 | -1.38 | 1.13 | 5.79E-03 | OR8G2(dist=20530), OR8G1(dist=3525)                | intergenic     |
| 11 | 7810948   | T | C | rs11500779  | 7.10E-01 | 0.261 | 0.271 | 0.95 | 0.84 | -1.07 | 9.46E-06 | 0.293 | 0.252 | 1.23 | 1.1  | -1.38 | 1.18 | 5.83E-03 | OVCH2(dist=83007), OR5P2(dist=6573)                | intergenic     |
| 10 | 108243842 | C | G | rs144969892 | 6.48E-05 | 0.097 | 0.072 | 1.39 | 1.14 | -1.69 | 9.33E-01 | 0.078 | 0.075 | 1.05 | 0.86 | -1.28 | 1.28 | 5.83E-03 | LOC101927549(dist=663751), SORCS1(dist=89579)      | intergenic     |
| 21 | 28298049  | A | G | rs229079    | 3.09E-05 | 0.164 | 0.199 | 0.78 | 0.68 | -0.91 | 9.53E-01 | 0.203 | 0.211 | 0.96 | 0.84 | -1.09 | 0.87 | 5.84E-03 | ADAMTS5                                            | intronic       |
| 8  | 5961216   | T | C | rs17076050  | 6.22E-01 | 0.174 | 0.187 | 0.92 | 0.79 | -1.06 | 2.44E-06 | 0.209 | 0.160 | 1.38 | 1.21 | -1.57 | 1.17 | 5.92E-03 | CSMD1(dist=1108888), LOC100287015(dist=299861)     | intergenic     |
| 1  | 66341400  | C | T | rs12759968  | 6.18E-01 | 0.041 | 0.039 | 1.07 | 0.81 | -1.41 | 9.66E-06 | 0.063 | 0.047 | 1.37 | 1.1  | -1.72 | 1.35 | 5.93E-03 | PDE4B                                              | intronic       |
| 16 | 26460232  | T | C | rs34319955  | 4.66E-05 | 0.134 | 0.091 | 1.55 | 1.3  | -1.84 | 8.16E-01 | 0.125 | 0.134 | 0.93 | 0.79 | -1.08 | 1.19 | 5.94E-03 | HS3ST4(dist=311223), C16orf82(dist=617987)         | intergenic     |
| 14 | 105084021 | A | T | rs10138987  | 7.57E-01 | 0.135 | 0.137 | 1.02 | 0.87 | -1.2  | 4.54E-05 | 0.162 | 0.125 | 0.74 | 0.64 | -0.85 | 0.85 | 5.95E-03 | TMEM179(dist=12924), MIR4710(dist=60010)           | intergenic     |
| 6  | 29404876  | A | G | rs138570612 | 8.42E-01 | 0.113 | 0.118 | 0.96 | 0.81 | -1.14 | 2.01E-05 | 0.133 | 0.094 | 1.48 | 1.26 | -1.74 | 1.20 | 5.98E-03 | OR11A1(dist=9367), OR10C1(dist=2840)               | intergenic     |
| 2  | 196719555 | T | A | rs1462293   | 8.54E-01 | 0.234 | 0.211 | 1.14 | 1    | -1.3  | 4.58E-05 | 0.206 | 0.267 | 0.71 | 0.63 | -0.81 | 0.87 | 6.02E-03 | DNAH7                                              | intronic       |
| 20 | 57963275  | C | T | rs57113192  | 5.34E-05 | 0.264 | 0.219 | 1.27 | 1.12 | -1.45 | 6.42E-01 | 0.244 | 0.248 | 0.98 | 0.87 | -1.1  | 1.17 | 6.02E-03 | EDN3(dist=62228), PHACTR3(dist=189289)             | intergenic     |
| 10 | 51500301  | A | G | rs2611502   | 5.27E-05 | 0.241 | 0.185 | 1.40 | 1.22 | -1.6  | 7.73E-01 | 0.231 | 0.236 | 0.97 | 0.86 | -1.1  | 1.16 | 6.04E-03 | TIMM23B                                            | intronic       |
| 7  | 78981676  | T | C | rs7788723   | 8.40E-01 | 0.112 | 0.113 | 0.99 | 0.83 | -1.18 | 5.92E-05 | 0.120 | 0.088 | 1.40 | 1.19 | -1.66 | 1.21 | 6.05E-03 | MAGI2                                              | intronic       |
| 2  | 196996654 | G | A | rs12994633  | 8.21E-01 | 0.199 | 0.177 | 1.16 | 1.01 | -1.33 | 4.58E-05 | 0.182 | 0.240 | 0.70 | 0.62 | -0.8  | 0.87 | 6.07E-03 | DNAH7(dist=63118), STK17B(dist=1653)               | intergenic     |
| 4  | 85372878  | G | A | rs1444956   | 8.62E-01 | 0.297 | 0.301 | 0.98 | 0.87 | -1.11 | 6.22E-05 | 0.328 | 0.281 | 1.25 | 1.12 | -1.4  | 1.12 | 6.07E-03 | LOC101928978(dist=152556), NKX6-1(dist=41558)      | intergenic     |
| 11 | 8537411   | G | A | rs2311390   | 6.40E-01 | 0.290 | 0.304 | 0.94 | 0.83 | -1.05 | 1.10E-05 | 0.315 | 0.262 | 1.29 | 1.15 | -1.45 | 1.13 | 6.08E-03 | STK33                                              | intronic       |
| 8  | 62686651  | G | T | rs34827206  | 9.03E-01 | 0.070 | 0.075 | 0.93 | 0.75 | -1.15 | 5.66E-06 | 0.069 | 0.044 | 1.61 | 1.29 | -2    | 1.29 | 6.12E-03 | MIR4470(dist=58233), NKAIN3(dist=475850)           | intergenic     |
| 21 | 20262503  | C | T | rs74932851  | 6.26E-05 | 0.071 | 0.048 | 1.54 | 1.22 | -1.94 | 8.20E-01 | 0.060 | 0.058 | 1.02 | 0.82 | -1.28 | 1.29 | 6.12E-03 | LOC101927797(dist=130373), LINC00320(dist=1852405) | intergenic     |
| 11 | 18593714  | C | T | rs10766486  | 8.01E-01 | 0.335 | 0.317 | 1.08 | 0.96 | -1.22 | 4.04E-05 | 0.325 | 0.388 | 0.76 | 0.68 | -0.85 | 0.89 | 6.14E-03 | UEVLD                                              | intronic       |
| 11 | 8535922   | G | A | rs1992756   | 6.46E-01 | 0.290 | 0.304 | 0.94 | 0.83 | -1.06 | 1.09E-05 | 0.314 | 0.261 | 1.29 | 1.15 | -1.45 | 1.13 | 6.14E-03 | STK33                                              | intronic       |
| 6  | 5458579   | A | G | rs2552289   | 7.06E-01 | 0.074 | 0.073 | 0.99 | 0.8  | -1.22 | 3.03E-05 | 0.104 | 0.080 | 0.74 | 0.62 | -0.89 | 0.80 | 6.15E-03 | FARS2                                              | intronic       |
| 4  | 85374120  | C | T | rs7690203   | 8.50E-01 | 0.299 | 0.302 | 0.98 | 0.87 | -1.11 | 6.05E-05 | 0.329 | 0.282 | 1.25 | 1.12 | -1.4  | 1.12 | 6.19E-03 | LOC101928978(dist=153798), NKX6-1(dist=40316)      | intergenic     |
| 15 | 10146947  | A | G | rs73480694  | 5.13E-05 | 0.178 | 0.231 | 0.72 | 0.63 | -0.83 | 8.05E-01 | 0.189 | 0.179 | 1.07 | 0.94 | -1.23 | 0.87 | 6.20E-03 | LRRK1                                              | intronic       |
| 8  | 5958623   | G | C | rs17076042  | 7.32E-01 | 0.165 | 0.178 | 0.91 | 0.79 | -1.06 | 4.88E-06 | 0.187 | 0.139 | 1.43 | 1.24 | -1.64 | 1.17 | 6.31E-03 | CSMD1(dist=1106295), LOC100287015(dist=302454)     | intergenic     |
| 7  | 158025328 | C | A | rs6949642   | 9.53E-01 | 0.385 | 0.373 | 0.95 | 0.85 | -1.06 | 4.12E-05 | 0.362 | 0.413 | 1.24 | 1.11 | -1.38 | 1.13 | 6.32E-03 | PTPRN2                                             | intronic       |
| 8  | 38817163  | T | A | rs73674664  | 9.37E-01 | 0.074 | 0.078 | 0.93 | 0.76 | -1.15 | 4.27E-05 | 0.100 | 0.069 | 1.51 | 1.26 | -1.8  | 1.24 | 6.34E-03 | PLEKHA2                                            | intronic       |
| 11 | 8548811   | T | C | rs11041960  | 5.91E-01 | 0.290 | 0.305 | 0.93 | 0.83 | -1.05 | 1.08E-05 | 0.318 | 0.264 | 1.30 | 1.16 | -1.45 | 1.13 | 6.35E-03 | STK33                                              | intronic       |
| 2  | 65950183  | C | A | rs62139656  | 1.14E-05 | 0.058 | 0.071 | 0.81 | 0.65 | -1.01 | 5.47E-01 | 0.071 | 0.075 | 0.94 | 0.77 | -1.15 | 0.74 | 6.37E-03 | SPRED2(dist=290527), MIR4778(dist=635198)          | intergenic     |
| 4  | 85371991  | A | G | rs7654114   | 8.97E-01 | 0.307 | 0.309 | 0.99 | 0.88 | -1.12 | 5.66E-05 | 0.336 | 0.292 | 1.23 | 1.1  | -1.37 | 1.13 | 6.42E-03 | LOC101928978(dist=151669), NKX6-1(dist=42445)      | intergenic     |
| 16 | 26441790  | C | T | rs34644807  | 4.48E-05 | 0.134 | 0.090 | 1.56 | 1.31 | -1.85 | 8.59E-01 | 0.125 | 0.134 | 0.92 | 0.79 | -1.08 | 1.19 | 6.56E-03 | HS3ST4(dist=292781), C16orf82(dist=636429)         | intergenic     |
| 3  | 63959465  | C | T | rs62252368  | 2.74E-01 | 0.192 | 0.204 | 0.92 | 0.8  | -1.06 | 1.50E-06 | 0.238 | 0.190 | 1.33 | 1.17 | -1.51 | 1.15 | 6.59E-03 | ATXN7                                              | intronic       |
| 3  | 143062266 | A | G | rs75353832  | 9.09E-01 | 0.039 | 0.042 | 0.94 | 0.71 | -1.24 | 2.36E-05 | 0.053 | 0.033 | 1.61 | 1.26 | -2.06 | 1.34 | 6.62E-03 | SLC9A9-AS1                                         | ncRNA_exon     |
| 13 | 27715813  | A | C | rs7326966   | 5.94E-05 | 0.391 | 0.451 | 1.28 | 1.15 | -1.43 | 9.62E-01 | 0.429 | 0.428 | 1.00 | 0.9  | -1.11 | 1.12 | 6.66E-03 | USP12-AS1                                          | ncRNA_intronic |
| 14 | 105081712 | T | C | rs7147154   | 7.65E-01 | 0.164 | 0.168 | 1.03 | 0.89 | -1.19 | 5.46E-05 | 0.198 | 0.156 | 0.75 | 0.66 | -0.86 | 0.86 | 6.66E-03 | TMEM179(dist=10615), MIR4710(dist=62319)           | intergenic     |
| 1  | 198125585 | T | C | rs80323693  | 3.46E-06 | 0.042 | 0.023 | 1.86 | 1.36 | -2.56 | 5.11E-01 | 0.027 | 0.028 | 0.96 | 0.7  | -1.32 | 1.39 | 6.68E-03 | NEK7                                               | upstream       |
| 5  | 3350440   | G | A | rs115134278 | 7.46E-01 | 0.048 | 0.052 | 0.93 | 0.72 | -1.19 | 5.71E-06 | 0.066 | 0.042 | 1.61 | 1.29 | -2.01 | 1.32 | 6.70E-03 | LINC01377(dist=169094), LINC01019(dist=66826)      | intergenic     |
| 10 | 55413116  | T | C | rs9416295   | 4.49E-05 | 0.136 | 0.091 | 1.57 | 1.32 | -1.87 | 8.55E-01 | 0.118 | 0.122 | 0.96 | 0.81 | -1.12 | 1.21 | 6.78E-03 | MBL2(dist=881656), PCDH15(dist=149417)             | intergenic     |
| 1  | 198128817 | T | C | rs115669600 | 3.58E-06 | 0.042 | 0.023 | 1.86 | 1.36 | -2.55 | 5.09E-01 | 0.027 | 0.028 | 0.96 | 0.7  | -1.32 | 1.39 | 6.78E-03 | NEK7                                               | intronic       |
| 1  | 198128839 | G | T | rs116180579 | 3.58E-06 | 0.042 | 0.023 | 1.86 | 1.36 | -2.55 | 5.09E-01 | 0.027 | 0.028 | 0.96 | 0.7  | -1.32 | 1.39 | 6.78E-03 | NEK7                                               | intronic       |
| 8  | 5959685   | G | T | rs76278735  | 7.16E-01 | 0.165 | 0.178 | 0.91 | 0.79 | -1.05 | 5.26E-06 | 0.187 | 0.139 | 1.42 | 1.24 | -1.63 | 1.16 | 6.83E-03 | CSMD1(dist=1107357), LOC100287015(dist=301392)     | intergenic     |
| 2  | 140211958 | C | T | rs11682693  | 9.29E-01 | 0.494 | 0.484 | 0.96 | 0.86 | -1.07 | 5.37E-05 | 0.532 | 0.474 | 1.27 | 1.14 | -1.41 | 1.12 | 6.84E-03 | YY1P2(dist=555214), LRP1B(dist=777038)             | intergenic     |
| 18 | 52874822  | C | T | rs9319977   | 6.82E-01 | 0.063 | 0.070 | 0.89 | 0.72 | -1.11 | 1.51E-05 | 0.078 | 0.051 | 1.59 | 1.29 | -1.95 | 1.26 | 6.85E-03 | LOC101927229(dist=83285), TCF4(dist=14740)         | intergenic     |
| 4  | 122556417 | C | T | rs28572619  | 9.06E-01 | 0.362 | 0.360 | 1.01 | 0.9  | -1.13 | 6.21E-05 | 0.321 | 0.369 | 0.81 | 0.73 | -0.91 | 0.89 | 6.86E-03 | QRFRP(dist=254236), ANXA5(dist=32735)              | intergenic     |
| 11 | 8510768   | C | T | rs11041949  | 5.79E-01 | 0.290 | 0.305 | 0.93 | 0.83 | -1.05 | 8.56E-06 | 0.317 | 0.263 | 1.30 | 1.16 | -1.45 | 1.13 | 6.87E-03 | STK33                                              | intronic       |
| 11 | 8525987   | T | C | rs73405938  | 5.79E-01 | 0.290 | 0.305 | 0.93 | 0.83 | -1.05 | 8.93E-06 | 0.316 | 0.262 | 1.30 | 1.16 | -1.45 | 1.13 | 6.90E-03 | STK33                                              | intronic       |
| 7  | 113472564 | C | G | rs10265135  | 4.99E-01 | 0.235 | 0.253 | 0.91 | 0.8  | -1.03 | 1.81E-06 | 0.265 | 0.210 | 1.36 | 1.2  | -1.53 | 1.15 | 6.99E-03 | LINC00998(dist=713927), PPP1R3A(dist=44318)        | intergenic     |
| 6  | 107467003 | T | C | rs114403483 | 8.39E-01 | 0.031 | 0.034 | 0.92 | 0.68 | -1.26 | 5.55E-05 | 0.051 | 0.032 | 1.63 | 1.27 | -2.1  | 1.42 | 7.03E-03 | BEND3(dist=31367), PDSS2(dist=6758)                | intergenic     |
| 2  | 196952298 | C | T | rs2139388   | 7.13E-01 | 0.189 | 0.166 | 1.17 | 1.02 | -1.35 | 3.72E-05 | 0.171 | 0.228 | 0.70 | 0.61 | -0.8  | 0.87 | 7.06E-03 | DNAH7(dist=18762), STK17B(dist=46009)              | intergenic     |
| 6  | 96970253  | G | A | rs79624430  | 8.93E-01 | 0.105 | 0.109 | 0.96 | 0.8  | -1.14 | 3.14E-05 | 0.123 | 0.088 | 1.45 | 1.23 | -1.71 | 1.21 | 7.07E-03 | UFL1                                               | intronic       |
| 11 | 7878148   | T | C | rs77169598  | 6.85E-01 | 0.181 | 0.182 | 0.99 | 0.86 | -1.14 | 2.68E-05 | 0.138 | 0.173 | 0.77 | 0.66 | -0.89 | 0.87 | 7.12E-03 | LOC283299                                          | ncRNA_intronic |
| 2  | 196953061 | T | G | rs10931719  | 7.91E-01 | 0.190 | 0.168 | 1.16 | 1.01 | -1.34 | 5.57E-05 | 0.174 | 0.230 | 0.70 | 0.61 | -0.8  | 0.87 | 7.17E-03 | DNAH7(dist=19525), STK17B(dist=45246)              | intergenic     |
| 11 | 36924596  | C | G | rs150396235 | 9.48E-01 | 0.032 | 0.035 | 0.92 | 0.68 | -1.25 | 6.14E-05 | 0.041 | 0.024 | 1.76 | 1.33 | -2.34 | 1.39 | 7.19E-03 | C11orf74(dist=243755), LOC103312105(dist=1715218)  | intergenic     |
| 5  | 154531496 | A | G | rs73808770  | 9.94E-01 | 0.104 | 0.109 | 0.95 | 0.79 | -1.13 | 6.13E-05 | 0.112 | 0.078 | 1.50 | 1.26 | -1.78 | 1.21 | 7.19E-03 | KIF4B(dist=133811), SGCD(dist=1222271)             | intergenic     |
| 3  | 118189580 | T | C | rs1520120   | 7.31E-01 | 0.388 | 0.379 | 1.04 | 0.   |       |          |       |       |      |      |       |      |          |                                                    |                |

|    |           |   |   |                      |          |       |       |      |      |       |          |       |       |      |      |       |      |          |                                                   |            |
|----|-----------|---|---|----------------------|----------|-------|-------|------|------|-------|----------|-------|-------|------|------|-------|------|----------|---------------------------------------------------|------------|
| 2  | 196955900 | C | A | rs6713835            | 7.78E-01 | 0.191 | 0.169 | 1.16 | 1.01 | -1.34 | 5.35E-05 | 0.173 | 0.229 | 0.70 | 0.61 | -0.8  | 0.87 | 7.36E-03 | DNAH7(dist=22364), STK17B(dist=42407)             | intergenic |
| 7  | 106656413 | G | A | rs849304             | 8.40E-06 | 0.183 | 0.144 | 1.33 | 1.15 | -1.55 | 5.03E-01 | 0.150 | 0.154 | 0.97 | 0.84 | -1.13 | 1.16 | 7.44E-03 | PIK3CG(dist=106990), PRKR2B(dist=28765)           | intergenic |
| 2  | 196723946 | T | C | rs1462290            | 7.96E-01 | 0.233 | 0.209 | 1.15 | 1    | -1.31 | 5.43E-05 | 0.207 | 0.268 | 0.71 | 0.63 | -0.81 | 0.88 | 7.46E-03 | DNAH7                                             | intronic   |
| 10 | 51521684  | T | G | rs2249986            | 3.08E-05 | 0.247 | 0.187 | 1.43 | 1.25 | -1.63 | 9.15E-01 | 0.230 | 0.237 | 0.96 | 0.85 | -1.09 | 1.15 | 7.48E-03 | TIMM23B                                           | intronic   |
| 4  | 58217300  | A | G | rs73818809           | 5.79E-01 | 0.027 | 0.030 | 0.87 | 0.63 | -1.22 | 8.85E-06 | 0.040 | 0.021 | 1.95 | 1.45 | -2.61 | 1.39 | 7.49E-03 | IGFBP7-AS1(dist=145835), LOC101928851(dist=74738) | intergenic |
| 6  | 29408204  | C | T | rs17177646           | 5.85E-01 | 0.062 | 0.065 | 0.95 | 0.76 | -1.18 | 2.30E-05 | 0.093 | 0.062 | 1.56 | 1.3  | -1.89 | 1.24 | 7.51E-03 | OR10C1                                            | exonic     |
| 11 | 76921090  | G | A | rs12793189           | 8.20E-01 | 0.439 | 0.445 | 1.02 | 0.92 | -1.14 | 3.84E-05 | 0.501 | 0.456 | 0.83 | 0.75 | -0.93 | 0.89 | 7.51E-03 | MYO7A                                             | intronic   |
| 16 | 26440033  | G | A | rs62034787           | 4.84E-05 | 0.134 | 0.091 | 1.55 | 1.31 | -1.85 | 8.91E-01 | 0.126 | 0.135 | 0.92 | 0.79 | -1.08 | 1.19 | 7.52E-03 | HS3ST4(dist=291024), C16orf82(dist=638186)        | intergenic |
| 10 | 55416851  | T | C | rs825822             | 6.17E-05 | 0.131 | 0.087 | 0.63 | 0.53 | -0.75 | 8.39E-01 | 0.114 | 0.119 | 1.05 | 0.89 | -1.23 | 0.83 | 7.54E-03 | MBL2(dist=885391), PCDH15(dist=145682)            | intergenic |
| 5  | 37981642  | A | C | rs10057592           | 9.05E-01 | 0.429 | 0.429 | 1.00 | 0.9  | -1.12 | 5.64E-05 | 0.378 | 0.421 | 0.83 | 0.75 | -0.93 | 0.89 | 7.57E-03 | GDNF-AS1(dist=105742), EGFLAM(dist=276869)        | intergenic |
| 21 | 28304838  | C | G | rs229044;rs386817552 | 1.43E-05 | 0.183 | 0.222 | 0.79 | 0.69 | -0.9  | 7.27E-01 | 0.223 | 0.226 | 0.98 | 0.87 | -1.11 | 0.87 | 7.60E-03 | ADAMT55                                           | intronic   |
| 14 | 105086888 | A | G | rs7155060            | 7.22E-01 | 0.135 | 0.138 | 1.02 | 0.87 | -1.2  | 6.02E-05 | 0.162 | 0.126 | 0.74 | 0.64 | -0.86 | 0.85 | 7.63E-03 | TMEM179(dist=15791), MIR4710(dist=57143)          | intergenic |
| 1  | 198258187 | G | C | rs115359978          | 3.24E-05 | 0.049 | 0.030 | 1.66 | 1.25 | -2.21 | 7.86E-01 | 0.036 | 0.035 | 1.03 | 0.78 | -1.36 | 1.34 | 7.65E-03 | NEK7                                              | intronic   |
| 10 | 51524274  | C | T | rs2843555            | 2.68E-05 | 0.246 | 0.185 | 1.43 | 1.25 | -1.63 | 9.35E-01 | 0.220 | 0.228 | 0.96 | 0.85 | -1.09 | 1.15 | 7.71E-03 | TIMM23B                                           | intronic   |
| 2  | 196955334 | A | G | rs6738827            | 7.37E-01 | 0.192 | 0.169 | 1.17 | 1.01 | -1.35 | 4.76E-05 | 0.173 | 0.230 | 0.70 | 0.61 | -0.8  | 0.87 | 7.74E-03 | DNAH7(dist=21798), STK17B(dist=42973)             | intergenic |
| 2  | 60124003  | T | C | rs6752231            | 8.18E-01 | 0.311 | 0.303 | 0.97 | 0.86 | -1.09 | 4.27E-05 | 0.260 | 0.314 | 1.30 | 1.15 | -1.46 | 1.13 | 7.75E-03 | LOC101927285(dist=617468), MIR4432(dist=490494)   | intergenic |
| 4  | 141828297 | A | G | rs2303412            | 7.08E-06 | 0.070 | 0.104 | 0.65 | 0.53 | -0.79 | 4.42E-01 | 0.095 | 0.091 | 1.04 | 0.87 | -1.25 | 0.82 | 7.82E-03 | RNF150                                            | intronic   |
| 20 | 53281908  | A | G | rs1997834            | 7.62E-01 | 0.226 | 0.228 | 1.01 | 0.89 | -1.15 | 5.04E-05 | 0.174 | 0.211 | 1.28 | 1.11 | -1.46 | 1.14 | 7.83E-03 | DOK5(dist=14198), LINC01441(dist=754966)          | intergenic |
| 2  | 196992803 | C | A | rs12621714           | 6.87E-01 | 0.196 | 0.172 | 1.17 | 1.02 | -1.35 | 4.14E-05 | 0.179 | 0.237 | 0.70 | 0.62 | -0.8  | 0.87 | 7.86E-03 | DNAH7(dist=59267), STK17B(dist=5504)              | intergenic |
| 10 | 50329743  | A | G | rs4838449            | 5.92E-05 | 0.287 | 0.222 | 0.71 | 0.63 | -0.8  | 8.63E-01 | 0.264 | 0.273 | 1.04 | 0.93 | -1.18 | 0.88 | 7.87E-03 | FAM170B-AS1                                       | upstream   |
| 19 | 46906400  | C | T | rs12463199           | 8.40E-06 | 0.275 | 0.317 | 1.22 | 1.08 | -1.38 | 5.91E-01 | 0.322 | 0.315 | 0.97 | 0.86 | -1.08 | 1.15 | 7.87E-03 | PPP5C(dist=12168), CCDC8(dist=7186)               | intergenic |
| 4  | 122563134 | C | G | rs4833228            | 5.72E-01 | 0.254 | 0.244 | 1.05 | 0.93 | -1.2  | 1.73E-05 | 0.218 | 0.269 | 0.75 | 0.67 | -0.85 | 0.88 | 7.88E-03 | QRFRP(dist=260953), ANXA5(dist=26018)             | intergenic |
| 21 | 28305647  | A | G | rs162499             | 4.04E-05 | 0.174 | 0.209 | 0.80 | 0.7  | -0.92 | 9.04E-01 | 0.206 | 0.213 | 0.96 | 0.84 | -1.09 | 0.87 | 7.90E-03 | ADAMT55                                           | intronic   |
| 10 | 32398589  | A | G | rs211422             | 1.97E-05 | 0.279 | 0.343 | 1.35 | 1.2  | -1.52 | 8.57E-01 | 0.302 | 0.294 | 0.96 | 0.86 | -1.08 | 1.13 | 7.94E-03 | KIF5B(dist=53218), EPC1(dist=158055)              | intergenic |
| 2  | 196976853 | T | C | rs1568366            | 7.58E-01 | 0.193 | 0.170 | 1.17 | 1.01 | -1.34 | 5.59E-05 | 0.174 | 0.231 | 0.70 | 0.61 | -0.8  | 0.87 | 7.94E-03 | DNAH7(dist=43317), STK17B(dist=21454)             | intergenic |
| 10 | 51530757  | G | A | rs10826127           | 1.78E-05 | 0.245 | 0.184 | 1.44 | 1.26 | -1.65 | 9.89E-01 | 0.220 | 0.229 | 0.95 | 0.84 | -1.08 | 1.15 | 7.98E-03 | TIMM23B                                           | intronic   |
| 1  | 198145413 | A | C | rs74388251           | 1.57E-05 | 0.044 | 0.026 | 1.73 | 1.28 | -2.33 | 6.22E-01 | 0.031 | 0.031 | 0.99 | 0.73 | -1.33 | 1.37 | 8.01E-03 | NEK7                                              | intronic   |
| 6  | 22400047  | G | T | rs6903942            | 5.92E-05 | 0.114 | 0.087 | 1.36 | 1.13 | -1.63 | 8.22E-01 | 0.084 | 0.081 | 1.05 | 0.87 | -1.27 | 1.21 | 8.02E-03 | PRL(dist=96965), HDGFL1(dist=169631)              | intergenic |
| 7  | 153932619 | C | T | rs4397309            | 5.53E-05 | 0.141 | 0.113 | 1.29 | 1.09 | -1.52 | 5.35E-01 | 0.117 | 0.116 | 1.01 | 0.86 | -1.18 | 1.22 | 8.03E-03 | DPP6                                              | intronic   |
| 13 | 110409931 | A | C | rs7996317            | 6.18E-06 | 0.127 | 0.096 | 1.37 | 1.16 | -1.64 | 5.23E-01 | 0.098 | 0.099 | 0.98 | 0.82 | -1.17 | 1.19 | 8.06E-03 | IRS2                                              | intronic   |
| 11 | 36926707  | C | T | rs112809811          | 8.21E-01 | 0.045 | 0.049 | 0.91 | 0.7  | -1.18 | 4.05E-05 | 0.063 | 0.040 | 1.61 | 1.29 | -2.03 | 1.30 | 8.08E-03 | C11orf74(dist=245866), LOC103312105(dist=1713107) | intergenic |
| 11 | 8513242   | G | A | rs7933271            | 5.74E-01 | 0.290 | 0.305 | 0.93 | 0.82 | -1.05 | 1.16E-05 | 0.315 | 0.263 | 1.29 | 1.15 | -1.45 | 1.12 | 8.11E-03 | STK33                                             | intronic   |
| 2  | 140171154 | C | T | rs78043311           | 8.82E-01 | 0.083 | 0.086 | 0.97 | 0.8  | -1.18 | 5.04E-05 | 0.059 | 0.082 | 0.69 | 0.56 | -0.86 | 0.82 | 8.19E-03 | YY1P2(dist=514410), LRP1B(dist=817842)            | intergenic |
| 4  | 58238701  | G | A | rs73818823           | 6.76E-01 | 0.027 | 0.031 | 0.89 | 0.64 | -1.24 | 3.07E-05 | 0.041 | 0.023 | 1.85 | 1.39 | -2.46 | 1.38 | 8.19E-03 | IGFBP7-AS1(dist=167236), LOC101928851(dist=53337) | intergenic |
| 2  | 196985734 | A | G | rs4014168            | 7.29E-01 | 0.191 | 0.169 | 1.16 | 1.01 | -1.34 | 5.42E-05 | 0.174 | 0.229 | 0.71 | 0.62 | -0.81 | 0.87 | 8.23E-03 | DNAH7(dist=52198), STK17B(dist=12573)             | intergenic |
| 16 | 26426788  | G | A | rs34896253           | 6.01E-05 | 0.134 | 0.091 | 1.55 | 1.3  | -1.84 | 8.87E-01 | 0.127 | 0.137 | 0.92 | 0.79 | -1.08 | 1.18 | 8.25E-03 | HS3ST4(dist=277779), C16orf82(dist=651431)        | intergenic |
| 5  | 154529922 | G | A | rs17117020           | 9.47E-01 | 0.106 | 0.112 | 0.94 | 0.79 | -1.12 | 5.49E-05 | 0.114 | 0.079 | 1.50 | 1.27 | -1.78 | 1.20 | 8.28E-03 | KIF4B(dist=132237), SGCD(dist=1223845)            | intergenic |
| 2  | 220634351 | C | T | rs77276515           | 2.98E-05 | 0.029 | 0.051 | 0.55 | 0.41 | -0.75 | 6.62E-01 | 0.041 | 0.038 | 1.08 | 0.83 | -1.41 | 0.75 | 8.29E-03 | SLC4A3(dist=127649), MIR4268(dist=136872)         | intergenic |
| 15 | 27629735  | G | T | rs75307139           | 7.94E-01 | 0.050 | 0.051 | 0.98 | 0.76 | -1.26 | 5.65E-05 | 0.049 | 0.031 | 1.58 | 1.22 | -2.04 | 1.33 | 8.32E-03 | GABRG3                                            | intronic   |
| 14 | 105084994 | A | C | rs11625738           | 6.37E-01 | 0.136 | 0.140 | 1.03 | 0.88 | -1.21 | 3.80E-05 | 0.167 | 0.130 | 0.74 | 0.65 | -0.86 | 0.86 | 8.38E-03 | TMEM179(dist=13897), MIR4710(dist=59037)          | intergenic |
| 7  | 54210733  | T | C | rs79120346           | 5.22E-05 | 0.049 | 0.079 | 0.60 | 0.48 | -0.76 | 7.09E-01 | 0.065 | 0.060 | 1.09 | 0.88 | -1.35 | 0.81 | 8.38E-03 | LINC01446(dist=331109), HPVC1(dist=58184)         | intergenic |
| 18 | 52878233  | G | A | rs147482428          | 6.24E-01 | 0.059 | 0.066 | 0.89 | 0.71 | -1.12 | 2.79E-05 | 0.076 | 0.049 | 1.59 | 1.3  | -1.96 | 1.26 | 8.38E-03 | LOC101927229(dist=86696), TCF4(dist=11329)        | intergenic |
| 19 | 36755708  | T | G | rs141967947          | 6.94E-01 | 0.069 | 0.077 | 0.89 | 0.72 | -1.1  | 3.42E-05 | 0.095 | 0.067 | 1.45 | 1.21 | -1.75 | 1.25 | 8.42E-03 | ZNF146(dist=26033), LOC100134317(dist=46537)      | intergenic |
| 2  | 2874131   | C | G | rs934566             | 8.27E-01 | 0.472 | 0.470 | 1.01 | 0.9  | -1.12 | 6.35E-05 | 0.417 | 0.468 | 0.81 | 0.73 | -0.9  | 0.90 | 8.42E-03 | MYT1L(dist=539046), LINC01250(dist=24689)         | intergenic |
| 7  | 54211123  | T | G | rs77886507           | 5.28E-05 | 0.049 | 0.079 | 0.60 | 0.48 | -0.76 | 7.07E-01 | 0.065 | 0.060 | 1.09 | 0.88 | -1.35 | 0.81 | 8.46E-03 | LINC01446(dist=331499), HPVC1(dist=57794)         | intergenic |
| 15 | 27630264  | C | T | rs78559188           | 8.04E-01 | 0.050 | 0.051 | 0.98 | 0.76 | -1.26 | 5.57E-05 | 0.049 | 0.031 | 1.58 | 1.22 | -2.04 | 1.33 | 8.48E-03 | GABRG3                                            | intronic   |
| 5  | 37983634  | C | T | rs10472296           | 8.84E-01 | 0.439 | 0.439 | 1.00 | 0.9  | -1.12 | 5.96E-05 | 0.384 | 0.426 | 0.84 | 0.75 | -0.93 | 0.90 | 8.49E-03 | GDNF-AS1(dist=107734), EGFLAM(dist=274877)        | intergenic |
| 5  | 154529013 | A | G | rs58540801           | 9.38E-01 | 0.106 | 0.112 | 0.94 | 0.79 | -1.12 | 5.50E-05 | 0.115 | 0.079 | 1.50 | 1.27 | -1.78 | 1.20 | 8.49E-03 | KIF4B(dist=131328), SGCD(dist=1224754)            | intergenic |
| 11 | 8504500   | G | T | rs57313949           | 4.66E-01 | 0.279 | 0.295 | 0.92 | 0.82 | -1.04 | 4.11E-06 | 0.302 | 0.249 | 1.30 | 1.16 | -1.46 | 1.13 | 8.52E-03 | STK33                                             | intronic   |
| 15 | 77669153  | G | A | rs115606865          | 5.50E-01 | 0.022 | 0.025 | 0.87 | 0.61 | -1.25 | 3.81E-05 | 0.042 | 0.025 | 1.73 | 1.31 | -2.29 | 1.42 | 8.56E-03 | PEAK1                                             | intronic   |
| 16 | 26426207  | C | T | rs11648273           | 6.28E-05 | 0.134 | 0.091 | 1.55 | 1.3  | -1.84 | 8.93E-01 | 0.127 | 0.137 | 0.92 | 0.79 | -1.07 | 1.18 | 8.59E-03 | HS3ST4(dist=277198), C16orf82(dist=652012)        | intergenic |
| 16 | 81663793  | G | A | rs7184768            | 7.45E-01 | 0.373 | 0.372 | 1.00 | 0.9  | -1.12 | 4.92E-05 | 0.395 | 0.350 | 1.21 | 1.09 | -1.35 | 1.12 | 8.63E-03 | CMIP                                              | intronic   |
| 10 | 36518128  | C | T | rs115674183          | 5.70E-05 | 0.013 | 0.030 | 0.41 | 0.27 | -0.64 | 7.87E-01 | 0.026 | 0.027 | 0.96 | 0.7  | -1.34 | 0.70 | 8.63E-03 | LINC01452(dist=428280), ANKRD30A(dist=896657)     | intergenic |
| 1  | 165406711 | T | A | rs74118603           | 3.83E-05 | 0.076 | 0.106 | 0.70 | 0.58 | -0.85 | 8.64E-01 | 0.095 | 0.093 | 1.02 | 0.85 | -1.22 | 0.83 | 8.69E-03 | XRXG                                              | intronic   |
| 8  | 5377029   | A | G | rs10100358           | 5.73E-05 | 0.023 | 0.047 | 0.49 | 0.35 | -0.68 | 6.41E-01 | 0.033 | 0.029 | 1.13 | 0.84 | -1.52 | 0.74 | 8.69E-03 | CSMD1(dist=524701), LOC100287015(dist=884048)     | intergenic |
| 2  | 80298534  | G | A | rs1484464            | 9.61E-01 | 0.067 | 0.065 | 0.96 | 0.77 | -1.2  | 3.01E-05 | 0.089 | 0.070 | 0.77 | 0.64 | -0.93 | 0.79 | 8.74E-03 | CTNNA2                                            | intronic   |
| 3  | 63982670  | C | T | rs112674299          | 1.88E-01 | 0.177 | 0     |      |      |       |          |       |       |      |      |       |      |          |                                                   |            |

|    |           |   |   |             |          |       |       |      |      |       |          |       |       |      |      |       |      |          |                                                  |                |
|----|-----------|---|---|-------------|----------|-------|-------|------|------|-------|----------|-------|-------|------|------|-------|------|----------|--------------------------------------------------|----------------|
| 2  | 220636750 | C | G | rs80079790  | 3.03E-05 | 0.030 | 0.052 | 0.57 | 0.42 | -0.76 | 6.60E-01 | 0.041 | 0.038 | 1.08 | 0.83 | -1.41 | 0.75 | 9.05E-03 | SLC4A3(dist=130048), MIR4268(dist=134473)        | intergenic     |
| 4  | 88307042  | G | A | rs115037129 | 4.43E-01 | 0.020 | 0.024 | 0.82 | 0.56 | -1.2  | 3.21E-05 | 0.039 | 0.021 | 1.91 | 1.42 | -2.56 | 1.43 | 9.08E-03 | HSD17B11                                         | intronic       |
| 2  | 154559734 | C | A | rs74362797  | 7.52E-01 | 0.038 | 0.038 | 0.99 | 0.75 | -1.32 | 6.18E-05 | 0.038 | 0.022 | 1.75 | 1.31 | -2.34 | 1.38 | 9.09E-03 | RPRM(dist=224412), GALNT13(dist=168677)          | intergenic     |
| 5  | 92199658  | G | A | rs75690877  | 4.14E-05 | 0.083 | 0.121 | 0.66 | 0.55 | -0.79 | 6.02E-01 | 0.102 | 0.094 | 1.09 | 0.92 | -1.3  | 0.84 | 9.10E-03 | ARRDC3-AS1(dist=1483126), NR2F1-AS1(dist=545404) | intergenic     |
| 21 | 28302006  | A | G | rs229090    | 2.47E-05 | 0.196 | 0.236 | 0.79 | 0.69 | -0.9  | 7.32E-01 | 0.234 | 0.237 | 0.99 | 0.87 | -1.11 | 0.88 | 9.18E-03 | ADAMTSS5                                         | intronic       |
| 10 | 34537601  | A | G | rs2804541   | 4.52E-05 | 0.358 | 0.428 | 0.74 | 0.66 | -0.83 | 9.45E-01 | 0.361 | 0.351 | 1.05 | 0.94 | -1.17 | 0.89 | 9.22E-03 | PARD3                                            | intronic       |
| 5  | 155751383 | C | G | rs4705003   | 4.67E-05 | 0.100 | 0.065 | 0.62 | 0.51 | -0.76 | 7.92E-01 | 0.081 | 0.089 | 1.11 | 0.92 | -1.35 | 0.82 | 9.34E-03 | KIF4B(dist=1353698), SGCD(dist=2384)             | intergenic     |
| 12 | 56394954  | A | G | rs773125    | 5.00E-01 | 0.422 | 0.413 | 1.04 | 0.93 | -1.16 | 3.04E-05 | 0.377 | 0.427 | 0.81 | 0.73 | -0.9  | 0.90 | 9.35E-03 | SUOX                                             | intronic       |
| 2  | 197026769 | A | G | rs1519601   | 5.72E-01 | 0.188 | 0.164 | 1.18 | 1.02 | -1.36 | 3.86E-05 | 0.177 | 0.235 | 0.70 | 0.61 | -0.8  | 0.87 | 9.37E-03 | STK17B                                           | intronic       |
| 21 | 28302558  | T | G | rs7281968   | 2.38E-05 | 0.195 | 0.234 | 0.79 | 0.69 | -0.9  | 7.21E-01 | 0.234 | 0.236 | 0.99 | 0.87 | -1.12 | 0.88 | 9.38E-03 | ADAMTSS5                                         | intronic       |
| 3  | 36819221  | A | T | rs1876470   | 4.78E-01 | 0.122 | 0.129 | 1.06 | 0.9  | -1.25 | 8.59E-06 | 0.166 | 0.130 | 0.75 | 0.65 | -0.86 | 0.85 | 9.44E-03 | DCLK3(dist=37869), TRANK1(dist=49087)            | intergenic     |
| 21 | 28302906  | G | A | rs2830584   | 2.44E-05 | 0.195 | 0.234 | 0.79 | 0.69 | -0.91 | 7.22E-01 | 0.234 | 0.236 | 0.99 | 0.87 | -1.12 | 0.88 | 9.45E-03 | ADAMTSS5                                         | intronic       |
| 8  | 5654482   | G | A | rs12156005  | 3.80E-05 | 0.136 | 0.098 | 1.45 | 1.22 | -1.72 | 6.56E-01 | 0.110 | 0.117 | 0.93 | 0.79 | -1.1  | 1.19 | 9.47E-03 | CSMD1(dist=802154), LOC100287015(dist=606595)    | intergenic     |
| 11 | 7854519   | C | T | rs7947347   | 2.00E-01 | 0.438 | 0.462 | 1.10 | 0.98 | -1.23 | 8.37E-07 | 0.505 | 0.435 | 0.76 | 0.68 | -0.84 | 0.90 | 9.50E-03 | OR5P3(dist=7000), OR5E1P(dist=16079)             | intergenic     |
| 4  | 172005983 | A | G | rs13133786  | 1.13E-05 | 0.049 | 0.070 | 0.67 | 0.53 | -0.85 | 3.88E-01 | 0.052 | 0.056 | 0.93 | 0.74 | -1.18 | 0.80 | 9.54E-03 | LOC100506122(dist=25672), MIR6082(dist=101352)   | intergenic     |
| 8  | 5957456   | A | G | rs17076034  | 4.62E-01 | 0.175 | 0.191 | 0.90 | 0.78 | -1.04 | 2.25E-06 | 0.217 | 0.168 | 1.38 | 1.21 | -1.57 | 1.15 | 9.54E-03 | CSMD1(dist=1105128), LOC100287015(dist=303621)   | intergenic     |
| 8  | 5961552   | G | C | rs75241974  | 8.23E-01 | 0.202 | 0.214 | 0.93 | 0.81 | -1.06 | 3.23E-05 | 0.222 | 0.173 | 1.36 | 1.2  | -1.55 | 1.15 | 9.55E-03 | CSMD1(dist=1109224), LOC100287015(dist=299525)   | intergenic     |
| 11 | 7854821   | A | G | rs10769836  | 1.95E-01 | 0.438 | 0.462 | 1.10 | 0.99 | -1.23 | 7.83E-07 | 0.505 | 0.436 | 0.76 | 0.68 | -0.84 | 0.90 | 9.58E-03 | OR5P3(dist=7302), OR5E1P(dist=15777)             | intergenic     |
| 8  | 63737164  | C | T | rs7830008   | 8.53E-01 | 0.032 | 0.035 | 0.91 | 0.67 | -1.23 | 4.96E-05 | 0.049 | 0.030 | 1.68 | 1.3  | -2.17 | 1.35 | 9.62E-03 | NKAIN3                                           | intronic       |
| 1  | 165394087 | A | T | rs41419946  | 6.31E-05 | 0.078 | 0.107 | 0.70 | 0.58 | -0.85 | 8.88E-01 | 0.097 | 0.096 | 1.01 | 0.85 | -1.21 | 0.83 | 9.62E-03 | RXRG(NM_001256571:c.-4908T>A)                    | UTR5           |
| 7  | 54213489  | A | G | rs940465    | 4.00E-05 | 0.103 | 0.145 | 1.48 | 1.25 | -1.76 | 5.64E-01 | 0.116 | 0.107 | 0.91 | 0.77 | -1.07 | 1.18 | 9.63E-03 | LINC01446(dist=333865), HPVC1(dist=55428)        | intergenic     |
| 4  | 172031172 | G | A | rs17247383  | 5.92E-05 | 0.101 | 0.130 | 0.75 | 0.63 | -0.89 | 6.00E-01 | 0.104 | 0.106 | 0.98 | 0.82 | -1.16 | 0.84 | 9.70E-03 | LOC100506122(dist=50861), MIR6082(dist=76163)    | intergenic     |
| 5  | 169064548 | C | T | rs264868    | 6.88E-01 | 0.383 | 0.388 | 1.02 | 0.91 | -1.14 | 3.36E-05 | 0.425 | 0.374 | 0.81 | 0.73 | -0.9  | 0.89 | 9.70E-03 | DOCK2                                            | intronic       |
| 4  | 172016463 | A | G | rs35094144  | 1.66E-05 | 0.052 | 0.075 | 0.68 | 0.54 | -0.86 | 4.06E-01 | 0.054 | 0.058 | 0.93 | 0.74 | -1.17 | 0.80 | 9.71E-03 | LOC100506122(dist=36152), MIR6082(dist=90872)    | intergenic     |
| 6  | 29403656  | A | G | rs116688008 | 5.15E-01 | 0.061 | 0.065 | 0.93 | 0.74 | -1.17 | 2.42E-05 | 0.093 | 0.062 | 1.56 | 1.29 | -1.88 | 1.23 | 9.73E-03 | OR11A1(dist=8147), OR10C1(dist=4060)             | intergenic     |
| 2  | 156576215 | A | G | rs148835155 | 8.24E-01 | 0.024 | 0.026 | 0.93 | 0.65 | -1.32 | 3.95E-05 | 0.035 | 0.021 | 1.68 | 1.24 | -2.27 | 1.52 | 9.76E-03 | KCNJ3(dist=861351), LOC101929378(dist=300832)    | intergenic     |
| 1  | 198125006 | C | T | rs60001478  | 1.29E-05 | 0.044 | 0.026 | 1.74 | 1.29 | -2.36 | 5.62E-01 | 0.029 | 0.030 | 0.97 | 0.71 | -1.33 | 1.36 | 9.78E-03 | LHX9(dist=225733), NEK7(dist=1102)               | intergenic     |
| 9  | 76924650  | C | A | rs11143913  | 3.37E-05 | 0.065 | 0.092 | 0.68 | 0.55 | -0.84 | 5.77E-01 | 0.078 | 0.075 | 1.06 | 0.87 | -1.28 | 0.81 | 9.84E-03 | MIR6130                                          | ncRNA_intronic |
| 10 | 50450730  | G | A | rs11101057  | 2.67E-06 | 0.149 | 0.091 | 1.75 | 1.47 | -2.07 | 7.25E-01 | 0.146 | 0.160 | 0.89 | 0.77 | -1.03 | 1.19 | 9.96E-03 | C10orf128(dist=54285), C10orf71-AS1(dist=53598)  | intergenic     |
| 1  | 198153784 | T | A | rs75803260  | 8.92E-06 | 0.040 | 0.022 | 1.82 | 1.32 | -2.5  | 4.88E-01 | 0.026 | 0.027 | 0.95 | 0.69 | -1.32 | 1.38 | 9.98E-03 | NEK7                                             | intronic       |
| 10 | 50436863  | T | A | rs10857448  | 1.65E-06 | 0.157 | 0.098 | 1.72 | 1.46 | -2.03 | 6.62E-01 | 0.152 | 0.167 | 0.89 | 0.77 | -1.03 | 1.19 | 9.99E-03 | C10orf128(dist=40418), C10orf71-AS1(dist=67465)  | intergenic     |
| 12 | 67140806  | C | T | rs73327093  | 5.81E-05 | 0.039 | 0.067 | 0.57 | 0.44 | -0.74 | 7.68E-01 | 0.052 | 0.048 | 1.08 | 0.85 | -1.37 | 0.79 | 1.00E-02 | GRIP1(dist=67881), LOC102724421(dist=330600)     | intergenic     |
| 2  | 197002663 | C | T | rs11676514  | 6.27E-01 | 0.187 | 0.163 | 1.18 | 1.02 | -1.36 | 5.66E-05 | 0.177 | 0.235 | 0.70 | 0.62 | -0.8  | 0.87 | 1.01E-02 | STK17B                                           | intronic       |
| 3  | 15562246  | A | G | rs4685251   | 4.55E-01 | 0.379 | 0.378 | 0.99 | 0.89 | -1.11 | 1.20E-05 | 0.418 | 0.376 | 0.84 | 0.76 | -0.93 | 0.90 | 1.01E-02 | COLQ                                             | intronic       |
| 4  | 81913206  | A | C | rs12186250  | 7.45E-01 | 0.029 | 0.033 | 1.15 | 0.84 | -1.58 | 4.71E-05 | 0.043 | 0.025 | 0.57 | 0.44 | -0.76 | 0.72 | 1.01E-02 | C4orf22(dist=28296), BMP3(dist=38913)            | intergenic     |
| 8  | 3118840   | A | G | rs7838785   | 7.00E-01 | 0.325 | 0.334 | 1.04 | 0.92 | -1.17 | 3.15E-05 | 0.354 | 0.298 | 0.77 | 0.69 | -0.86 | 0.89 | 1.01E-02 | CSMD1                                            | intronic       |
| 11 | 8495512   | G | C | rs142599164 | 7.77E-01 | 0.035 | 0.037 | 0.95 | 0.71 | -1.27 | 5.50E-05 | 0.056 | 0.038 | 1.49 | 1.17 | -1.88 | 1.33 | 1.02E-02 | STK33                                            | intronic       |
| 7  | 19186465  | C | T | rs10257807  | 6.44E-01 | 0.071 | 0.073 | 0.98 | 0.79 | -1.21 | 4.78E-05 | 0.107 | 0.079 | 1.40 | 1.18 | -1.67 | 1.23 | 1.02E-02 | FERD3L(dist=1421), TWISTNB(dist=548620)          | intergenic     |
| 15 | 101474902 | G | A | rs74801720  | 3.81E-05 | 0.175 | 0.230 | 0.71 | 0.62 | -0.81 | 5.65E-01 | 0.193 | 0.179 | 1.10 | 0.96 | -1.26 | 0.88 | 1.02E-02 | LRRK1                                            | intronic       |
| 5  | 37999798  | C | T | rs1508839   | 7.20E-01 | 0.356 | 0.352 | 1.02 | 0.91 | -1.14 | 4.48E-05 | 0.304 | 0.349 | 0.81 | 0.73 | -0.91 | 0.90 | 1.03E-02 | GDNF-AS1(dist=123898), EGFLAM(dist=258713)       | intergenic     |
| 3  | 36824677  | G | A | rs906480    | 6.70E-01 | 0.097 | 0.098 | 1.01 | 0.84 | -1.22 | 3.76E-05 | 0.145 | 0.116 | 0.77 | 0.66 | -0.9  | 0.84 | 1.03E-02 | DCLK3(dist=43325), TRANK1(dist=43631)            | intergenic     |
| 16 | 84535162  | G | C | rs380010    | 4.66E-01 | 0.223 | 0.200 | 1.15 | 1.01 | -1.31 | 5.62E-05 | 0.197 | 0.253 | 0.72 | 0.64 | -0.82 | 0.87 | 1.03E-02 | TLDC1                                            | intronic       |
| 21 | 28306308  | G | A | rs162497    | 3.81E-05 | 0.186 | 0.223 | 0.80 | 0.69 | -0.91 | 7.54E-01 | 0.220 | 0.224 | 0.98 | 0.86 | -1.11 | 0.88 | 1.04E-02 | ADAMTSS5                                         | intronic       |
| 4  | 5730954   | G | A | rs2276875   | 1.88E-05 | 0.066 | 0.078 | 0.84 | 0.68 | -1.04 | 6.44E-01 | 0.095 | 0.101 | 0.93 | 0.78 | -1.12 | 0.79 | 1.04E-02 | EVC                                              | intronic       |
| 10 | 56371176  | G | A | rs1937409   | 4.33E-05 | 0.381 | 0.438 | 1.26 | 1.13 | -1.41 | 9.57E-01 | 0.420 | 0.417 | 0.99 | 0.89 | -1.1  | 1.12 | 1.04E-02 | PCDH15                                           | intronic       |
| 7  | 77990646  | C | G | rs10261582  | 7.56E-01 | 0.195 | 0.192 | 0.98 | 0.85 | -1.13 | 4.10E-05 | 0.161 | 0.201 | 1.31 | 1.14 | -1.51 | 1.15 | 1.05E-02 | MAGI2                                            | intronic       |
| 2  | 197010823 | C | T | rs2271888   | 5.69E-01 | 0.192 | 0.167 | 1.18 | 1.02 | -1.36 | 4.52E-05 | 0.180 | 0.238 | 0.70 | 0.62 | -0.8  | 0.87 | 1.05E-02 | STK17B                                           | intronic       |
| 13 | 46728597  | C | A | rs56797349  | 9.89E-01 | 0.035 | 0.037 | 0.94 | 0.7  | -1.26 | 5.70E-05 | 0.037 | 0.022 | 1.70 | 1.27 | -2.29 | 1.46 | 1.05E-02 | LCP1                                             | intronic       |
| 7  | 106650540 | T | C | rs6954575   | 4.12E-06 | 0.178 | 0.139 | 1.35 | 1.16 | -1.56 | 3.54E-01 | 0.145 | 0.151 | 0.95 | 0.82 | -1.11 | 1.16 | 1.05E-02 | PIK3CG(dist=101117), PRKAR2B(dist=34638)         | intergenic     |
| 11 | 8620053   | A | C | rs117307454 | 5.95E-01 | 0.033 | 0.036 | 0.92 | 0.68 | -1.24 | 5.52E-05 | 0.057 | 0.038 | 1.55 | 1.22 | -1.96 | 1.32 | 1.06E-02 | STK33(dist=4217), TRIM66(dist=13531)             | intergenic     |
| 8  | 3121192   | C | T | rs6996492   | 7.25E-01 | 0.469 | 0.480 | 1.05 | 0.94 | -1.17 | 5.48E-05 | 0.490 | 0.425 | 0.77 | 0.7  | -0.86 | 0.90 | 1.07E-02 | CSMD1                                            | intronic       |
| 8  | 5398900   | G | A | rs10102121  | 5.78E-05 | 0.024 | 0.047 | 0.49 | 0.36 | -0.68 | 5.42E-01 | 0.032 | 0.028 | 1.15 | 0.86 | -1.56 | 0.74 | 1.07E-02 | CSMD1(dist=546572), LOC100287015(dist=862177)    | intergenic     |
| 20 | 58267277  | C | T | rs144361651 | 8.49E-01 | 0.038 | 0.040 | 0.95 | 0.72 | -1.26 | 6.26E-05 | 0.045 | 0.026 | 1.72 | 1.31 | -2.26 | 1.35 | 1.07E-02 | PHACTR3                                          | intronic       |
| 6  | 29417198  | C | A | rs114854144 | 5.01E-01 | 0.061 | 0.066 | 0.93 | 0.74 | -1.16 | 2.60E-05 | 0.092 | 0.061 | 1.56 | 1.29 | -1.89 | 1.23 | 1.08E-02 | OR10C1(dist=8444), OR2H1(dist=9032)              | intergenic     |
| 5  | 61930099  | T | C | rs7735741   | 6.04E-01 | 0.158 | 0.149 | 0.93 | 0.8  | -1.08 | 4.59E-05 | 0.140 | 0.184 | 1.39 | 1.2  | -1.61 | 1.15 | 1.08E-02 | IPO11(dist=5683), HTR1A(dist=1325776)            | intergenic     |
| 7  | 113505111 | A | T | rs61075694  | 6.43E-01 | 0.308 | 0.314 | 0.97 | 0.86 | -1.1  | 2.98E-05 | 0.352 | 0.303 | 1.25 | 1.12 | -1.39 | 1.12 | 1.08E-02 | LINC00998(dist=746474), PPP1R3A(dist=11771)      | intergenic     |
| 2  | 196997203 | T | C | rs10931722  | 5.60E-01 | 0.193 | 0.168 | 1.18 | 1.02 | -1.36 | 4.45E-05 | 0.182 | 0.240 | 0.70 | 0.62 | -0.8  |      |          |                                                  |                |

|    |           |   |   |                       |          |       |       |      |      |       |          |       |       |      |      |       |      |          |                                                   |                |
|----|-----------|---|---|-----------------------|----------|-------|-------|------|------|-------|----------|-------|-------|------|------|-------|------|----------|---------------------------------------------------|----------------|
| 9  | 80079180  | G | T | rs62571503            | 6.04E-06 | 0.063 | 0.033 | 1.95 | 1.5  | -2.53 | 6.24E-01 | 0.048 | 0.056 | 0.85 | 0.67 | -1.08 | 1.30 | 1.12E-02 | GNA14-AS1                                         | ncRNA_intronic |
| 4  | 172004003 | C | T | rs72708451            | 2.23E-05 | 0.051 | 0.073 | 0.68 | 0.54 | -0.86 | 4.03E-01 | 0.054 | 0.057 | 0.93 | 0.74 | -1.17 | 0.81 | 1.13E-02 | LOC100506122(dist=23692), MIR6082(dist=103332)    | intergenic     |
| 6  | 98173858  | A | G | rs75318248            | 3.00E-05 | 0.076 | 0.054 | 1.45 | 1.16 | -1.81 | 5.74E-01 | 0.054 | 0.053 | 1.01 | 0.8  | -1.27 | 1.29 | 1.13E-02 | LOC101927314(dist=17065), MIR2113(dist=298549)    | intergenic     |
| 11 | 8522826   | G | C | rs11041953            | 5.72E-01 | 0.263 | 0.276 | 0.93 | 0.83 | -1.06 | 2.66E-05 | 0.294 | 0.245 | 1.28 | 1.14 | -1.44 | 1.12 | 1.14E-02 | STK33                                             | intronic       |
| 14 | 105433947 | C | A | rs115956192           | 6.98E-01 | 0.025 | 0.027 | 0.93 | 0.66 | -1.31 | 2.14E-05 | 0.036 | 0.021 | 1.72 | 1.28 | -2.33 | 1.47 | 1.15E-02 | AHNAK2                                            | intronic       |
| 16 | 76252388  | A | C | rs8059365             | 4.70E-01 | 0.363 | 0.373 | 0.96 | 0.85 | -1.07 | 3.53E-05 | 0.414 | 0.367 | 1.22 | 1.09 | -1.35 | 1.12 | 1.15E-02 | TERF2IP(dist=561047), CNTNAP4(dist=58788)         | intergenic     |
| 8  | 5963920   | G | C | rs57137549            | 6.18E-01 | 0.190 | 0.205 | 0.91 | 0.79 | -1.04 | 1.75E-05 | 0.217 | 0.166 | 1.39 | 1.22 | -1.58 | 1.14 | 1.18E-02 | CSMD1(dist=1111592), LOC100287015(dist=297157)    | intergenic     |
| 10 | 131083694 | G | A | rs11016737            | 5.07E-01 | 0.154 | 0.154 | 1.00 | 0.86 | -1.16 | 4.88E-05 | 0.212 | 0.185 | 1.19 | 1.04 | -1.35 | 1.16 | 1.20E-02 | LINC01163(dist=967704), MGMT(dist=181760)         | intergenic     |
| 8  | 5963616   | G | C | rs57358452            | 6.11E-01 | 0.190 | 0.205 | 0.91 | 0.79 | -1.04 | 1.81E-05 | 0.217 | 0.166 | 1.39 | 1.22 | -1.58 | 1.14 | 1.23E-02 | CSMD1(dist=1111288), LOC100287015(dist=297461)    | intergenic     |
| 20 | 53284305  | C | T | rs6023475             | 6.01E-01 | 0.218 | 0.217 | 1.00 | 0.87 | -1.14 | 5.21E-05 | 0.165 | 0.202 | 1.28 | 1.12 | -1.47 | 1.13 | 1.24E-02 | DOK5(dist=16595), LINC01441(dist=752569)          | intergenic     |
| 13 | 91443276  | C | T | rs9515805             | 1.95E-05 | 0.165 | 0.122 | 1.42 | 1.22 | -1.66 | 5.45E-01 | 0.142 | 0.153 | 0.92 | 0.79 | -1.07 | 1.16 | 1.24E-02 | LINC01049(dist=255681), LINC00410(dist=99932)     | intergenic     |
| 3  | 36825111  | C | T | rs1472861             | 6.44E-01 | 0.098 | 0.099 | 1.01 | 0.84 | -1.22 | 5.46E-05 | 0.140 | 0.112 | 0.78 | 0.66 | -0.9  | 0.84 | 1.25E-02 | DCLK3(dist=43759), TRANK1(dist=43197)             | intergenic     |
| 10 | 50426639  | G | A | rs7082708             | 5.17E-06 | 0.148 | 0.092 | 1.72 | 1.45 | -2.04 | 7.14E-01 | 0.140 | 0.155 | 0.89 | 0.77 | -1.03 | 1.18 | 1.26E-02 | C10orf128(dist=30194), C10orf71-AS1(dist=77689)   | intergenic     |
| 5  | 155804141 | A | G | rs1504927             | 4.79E-05 | 0.079 | 0.046 | 0.57 | 0.45 | -0.71 | 7.95E-01 | 0.071 | 0.080 | 1.14 | 0.93 | -1.39 | 0.81 | 1.27E-02 | SGCD                                              | intronic       |
| 1  | 66334518  | C | T | rs35825384            | 4.30E-01 | 0.055 | 0.055 | 1.00 | 0.79 | -1.27 | 3.15E-05 | 0.086 | 0.066 | 1.33 | 1.1  | -1.61 | 1.26 | 1.28E-02 | PDE4B                                             | intronic       |
| 11 | 8539069   | C | T | rs12226069            | 4.01E-01 | 0.304 | 0.321 | 0.93 | 0.82 | -1.04 | 8.05E-06 | 0.326 | 0.275 | 1.28 | 1.14 | -1.43 | 1.12 | 1.28E-02 | STK33                                             | intronic       |
| 7  | 7848912   | C | T | rs10259199            | 8.10E-01 | 0.252 | 0.265 | 0.94 | 0.83 | -1.06 | 5.90E-05 | 0.302 | 0.255 | 1.27 | 1.13 | -1.42 | 1.13 | 1.28E-02 | UMAD1                                             | intronic       |
| 9  | 80078548  | G | T | rs62571502            | 6.19E-06 | 0.062 | 0.032 | 1.98 | 1.52 | -2.58 | 5.83E-01 | 0.047 | 0.055 | 0.85 | 0.66 | -1.08 | 1.29 | 1.28E-02 | GNA14-AS1                                         | ncRNA_intronic |
| 20 | 53283184  | T | C | rs2870340             | 5.64E-01 | 0.216 | 0.215 | 0.99 | 0.87 | -1.14 | 4.31E-05 | 0.165 | 0.203 | 1.29 | 1.12 | -1.48 | 1.13 | 1.28E-02 | DOK5(dist=15474), LINC01441(dist=753690)          | intergenic     |
| 11 | 8537159   | G | T | rs11041955            | 6.45E-01 | 0.249 | 0.259 | 0.95 | 0.83 | -1.07 | 6.24E-05 | 0.279 | 0.233 | 1.27 | 1.13 | -1.43 | 1.12 | 1.30E-02 | STK33                                             | intronic       |
| 18 | 4863799   | G | C | rs8085811             | 6.27E-01 | 0.119 | 0.127 | 0.93 | 0.78 | -1.09 | 1.43E-05 | 0.148 | 0.112 | 1.37 | 1.18 | -1.59 | 1.18 | 1.30E-02 | DLGAP1(dist=408533), C18orf42(dist=279873)        | intergenic     |
| 13 | 91439462  | A | C | rs9523079             | 1.95E-05 | 0.165 | 0.122 | 1.43 | 1.22 | -1.67 | 5.25E-01 | 0.143 | 0.153 | 0.92 | 0.79 | -1.06 | 1.16 | 1.30E-02 | LINC01049(dist=251867), LINC00410(dist=103746)    | intergenic     |
| 3  | 70339885  | C | T | rs6766653             | 5.96E-05 | 0.294 | 0.249 | 1.26 | 1.11 | -1.42 | 6.15E-01 | 0.262 | 0.266 | 0.98 | 0.87 | -1.1  | 1.12 | 1.31E-02 | LINC01212(dist=275434), FOXP1(dist=663980)        | intergenic     |
| 11 | 8492384   | A | T | rs58049051            | 6.58E-01 | 0.033 | 0.036 | 0.92 | 0.69 | -1.25 | 5.19E-05 | 0.055 | 0.037 | 1.51 | 1.19 | -1.92 | 1.32 | 1.31E-02 | STK33                                             | intronic       |
| 11 | 18610041  | C | T | rs61884724            | 2.77E-01 | 0.028 | 0.029 | 0.96 | 0.69 | -1.33 | 1.39E-05 | 0.052 | 0.037 | 1.41 | 1.11 | -1.8  | 1.36 | 1.31E-02 | UEVLD                                             | intronic       |
| 10 | 51489215  | C | T | rs2611493             | 2.28E-05 | 0.269 | 0.211 | 1.37 | 1.21 | -1.56 | 7.99E-01 | 0.272 | 0.284 | 0.95 | 0.84 | -1.06 | 1.15 | 1.31E-02 | TIMM23B                                           | intronic       |
| 1  | 21719538  | C | G | rs59538708            | 6.16E-01 | 0.084 | 0.080 | 1.05 | 0.86 | -1.28 | 5.44E-05 | 0.074 | 0.098 | 0.73 | 0.61 | -0.89 | 0.81 | 1.33E-02 | ECE1(dist=47504), NBP3(dist=47045)                | intergenic     |
| 11 | 8545468   | G | A | rs7950041             | 6.06E-01 | 0.258 | 0.271 | 0.93 | 0.82 | -1.06 | 4.27E-05 | 0.280 | 0.233 | 1.28 | 1.14 | -1.44 | 1.12 | 1.33E-02 | STK33                                             | intronic       |
| 18 | 4863506   | C | T | rs73942629            | 6.28E-01 | 0.118 | 0.127 | 0.93 | 0.78 | -1.09 | 1.53E-05 | 0.147 | 0.112 | 1.37 | 1.18 | -1.59 | 1.18 | 1.33E-02 | DLGAP1(dist=408240), C18orf42(dist=280166)        | intergenic     |
| 11 | 8524933   | T | C | rs61447809            | 3.05E-01 | 0.310 | 0.328 | 0.92 | 0.82 | -1.03 | 4.12E-06 | 0.342 | 0.289 | 1.28 | 1.15 | -1.43 | 1.11 | 1.33E-02 | STK33                                             | intronic       |
| 18 | 4863586   | T | C | rs73942630            | 6.27E-01 | 0.118 | 0.127 | 0.93 | 0.78 | -1.09 | 1.54E-05 | 0.147 | 0.112 | 1.37 | 1.18 | -1.59 | 1.18 | 1.33E-02 | DLGAP1(dist=408320), C18orf42(dist=280086)        | intergenic     |
| 19 | 58245332  | G | A | rs9676995;rs386811350 | 5.60E-01 | 0.186 | 0.194 | 0.95 | 0.83 | -1.09 | 4.54E-05 | 0.237 | 0.201 | 1.24 | 1.09 | -1.4  | 1.15 | 1.34E-02 | ZNF671(dist=6337), ZNF776(dist=12832)             | intergenic     |
| 8  | 5971072   | G | A | rs146054152           | 6.04E-01 | 0.137 | 0.147 | 0.92 | 0.79 | -1.08 | 2.08E-05 | 0.156 | 0.121 | 1.34 | 1.15 | -1.55 | 1.19 | 1.35E-02 | CSMD1(dist=1118744), LOC100287015(dist=290005)    | intergenic     |
| 6  | 29351641  | A | G | rs238873              | 6.28E-05 | 0.083 | 0.121 | 0.66 | 0.54 | -0.79 | 7.32E-01 | 0.109 | 0.102 | 1.07 | 0.91 | -1.27 | 0.85 | 1.35E-02 | OR12D3(dist=8573), OR12D2(dist=12775)             | intergenic     |
| 21 | 28303523  | G | A | rs151056              | 2.57E-05 | 0.188 | 0.225 | 0.79 | 0.69 | -0.91 | 6.06E-01 | 0.229 | 0.231 | 0.99 | 0.88 | -1.12 | 0.88 | 1.35E-02 | ADAMTS5                                           | intronic       |
| 20 | 53283031  | G | T | rs2904389             | 5.52E-01 | 0.216 | 0.215 | 0.99 | 0.87 | -1.13 | 4.46E-05 | 0.165 | 0.203 | 1.29 | 1.12 | -1.48 | 1.13 | 1.35E-02 | DOK5(dist=15321), LINC01441(dist=753843)          | intergenic     |
| 7  | 113547890 | T | G | rs7792710             | 7.33E-01 | 0.449 | 0.458 | 1.04 | 0.93 | -1.16 | 6.21E-05 | 0.488 | 0.435 | 0.81 | 0.73 | -0.9  | 0.90 | 1.35E-02 | PPP1R3A                                           | intronic       |
| 17 | 39220899  | T | C | rs112293933           | 6.23E-01 | 0.065 | 0.072 | 0.90 | 0.72 | -1.12 | 3.88E-05 | 0.092 | 0.064 | 1.50 | 1.24 | -1.81 | 1.23 | 1.36E-02 | KRTAP2-4                                          | downstream     |
| 16 | 89796010  | G | A | rs7185737             | 6.84E-01 | 0.191 | 0.186 | 0.97 | 0.84 | -1.12 | 2.96E-05 | 0.206 | 0.240 | 1.21 | 1.07 | -1.38 | 1.15 | 1.37E-02 | ZNF276                                            | intronic       |
| 19 | 36753559  | A | G | rs146500904           | 5.82E-01 | 0.065 | 0.073 | 0.88 | 0.71 | -1.09 | 4.86E-05 | 0.091 | 0.064 | 1.45 | 1.2  | -1.76 | 1.24 | 1.37E-02 | ZNF146(dist=23884), LOC100134317(dist=48686)      | intergenic     |
| 11 | 8489008   | T | C | rs149189806           | 6.63E-01 | 0.033 | 0.036 | 0.93 | 0.69 | -1.25 | 5.44E-05 | 0.053 | 0.036 | 1.52 | 1.19 | -1.93 | 1.32 | 1.38E-02 | STK33                                             | intronic       |
| 15 | 48797307  | A | G | rs25458               | 4.28E-05 | 0.461 | 0.416 | 1.20 | 1.08 | -1.34 | 5.15E-01 | 0.429 | 0.426 | 1.01 | 0.91 | -1.13 | 1.10 | 1.38E-02 | FBN1                                              | exonic         |
| 4  | 58166994  | G | T | rs56062419            | 3.29E-01 | 0.036 | 0.042 | 0.84 | 0.63 | -1.12 | 2.92E-06 | 0.049 | 0.027 | 1.85 | 1.42 | -2.4  | 1.31 | 1.39E-02 | IGFBP7-AS1(dist=95529), LOC101928851(dist=125044) | intergenic     |
| 16 | 11424058  | A | G | rs112743879           | 4.17E-05 | 0.290 | 0.231 | 1.36 | 1.2  | -1.54 | 7.46E-01 | 0.269 | 0.284 | 0.93 | 0.82 | -1.04 | 1.13 | 1.41E-02 | PRM1(dist=48866), RMI2(dist=15237)                | intergenic     |
| 13 | 91436557  | C | T | rs7993405             | 1.95E-05 | 0.165 | 0.122 | 1.43 | 1.22 | -1.67 | 5.00E-01 | 0.142 | 0.153 | 0.92 | 0.79 | -1.06 | 1.16 | 1.42E-02 | LINC01049(dist=248962), LINC00410(dist=106651)    | intergenic     |
| 11 | 7856650   | C | T | rs10769839            | 1.76E-01 | 0.428 | 0.452 | 1.10 | 0.99 | -1.23 | 1.37E-06 | 0.499 | 0.431 | 0.76 | 0.69 | -0.85 | 0.91 | 1.42E-02 | OR5P3(dist=9131), OR5E1P(dist=13948)              | intergenic     |
| 10 | 51533376  | C | T | rs9787697             | 4.12E-05 | 0.240 | 0.182 | 1.43 | 1.25 | -1.63 | 9.00E-01 | 0.218 | 0.227 | 0.95 | 0.84 | -1.07 | 1.13 | 1.42E-02 | TIMM23B                                           | intronic       |
| 11 | 7857076   | G | A | rs10769841            | 1.75E-01 | 0.428 | 0.452 | 1.10 | 0.99 | -1.23 | 1.37E-06 | 0.499 | 0.431 | 0.76 | 0.69 | -0.84 | 0.91 | 1.43E-02 | OR5P3(dist=9557), OR5E1P(dist=13522)              | intergenic     |
| 4  | 157132561 | G | A | rs114144144           | 3.80E-05 | 0.077 | 0.053 | 1.49 | 1.19 | -1.86 | 2.18E-01 | 0.049 | 0.055 | 0.89 | 0.7  | -1.13 | 1.28 | 1.44E-02 | CTSO(dist=257513), PDGFC(dist=550202)             | intergenic     |
| 10 | 32600462  | C | A | rs2505414             | 1.20E-05 | 0.240 | 0.175 | 1.50 | 1.31 | -1.71 | 7.08E-01 | 0.227 | 0.244 | 0.91 | 0.81 | -1.03 | 1.14 | 1.45E-02 | EPC1                                              | intronic       |
| 13 | 91426634  | T | C | rs9523076             | 2.16E-05 | 0.164 | 0.121 | 1.42 | 1.21 | -1.66 | 5.18E-01 | 0.143 | 0.154 | 0.92 | 0.79 | -1.07 | 1.16 | 1.45E-02 | LINC01049(dist=239039), LINC00410(dist=116574)    | intergenic     |
| 13 | 91434604  | A | T | rs9515803             | 2.04E-05 | 0.165 | 0.122 | 1.43 | 1.22 | -1.67 | 4.98E-01 | 0.143 | 0.154 | 0.92 | 0.79 | -1.06 | 1.15 | 1.47E-02 | LINC01049(dist=247009), LINC00410(dist=108604)    | intergenic     |
| 1  | 198257324 | A | G | rs58740678            | 7.04E-06 | 0.044 | 0.025 | 1.79 | 1.32 | -2.42 | 3.45E-01 | 0.028 | 0.030 | 0.92 | 0.67 | -1.26 | 1.34 | 1.47E-02 | NEK7                                              | intronic       |
| 3  | 81362670  | A | G | rs7646047             | 5.84E-01 | 0.113 | 0.123 | 0.91 | 0.77 | -1.08 | 5.68E-05 | 0.140 | 0.104 | 1.40 | 1.2  | -1.64 | 1.17 | 1.47E-02 | ROBO1(dist=1545611), GBE1(dist=176180)            | intergenic     |
| 11 | 7810270   | T | G | rs77359649            | 3.22E-01 | 0.459 | 0.480 | 0.92 | 0.82 | -1.02 | 8.57E-06 | 0.508 | 0.445 | 1.29 | 1.16 | -1.43 | 1.11 | 1.49E-02 | OVCH2(dist=82329), OR5P2(dist=7251)               | intergenic     |
| 13 | 91430926  | G | C | rs12877329            | 2.33E-05 | 0.165 | 0.122 | 1.42 | 1.22 | -1.66 | 5.08E-01 | 0.142 | 0.153 | 0.92 | 0.79 | -1.06 | 1.15 | 1.50E-02 | LINC01049(dist=243331), LINC00410(dist=112282)    | intergenic     |
| 13 | 91429074  | A | G | rs9515801             | 2.37E-05 |       |       |      |      |       |          |       |       |      |      |       |      |          |                                                   |                |

|    |           |   |   |             |          |       |       |      |      |       |          |       |       |      |      |       |      |          |                                                |                |
|----|-----------|---|---|-------------|----------|-------|-------|------|------|-------|----------|-------|-------|------|------|-------|------|----------|------------------------------------------------|----------------|
| 12 | 56393337  | C | G | rs1081975   | 4.18E-01 | 0.445 | 0.435 | 1.04 | 0.93 | -1.17 | 5.07E-05 | 0.396 | 0.447 | 0.81 | 0.73 | -0.9  | 0.91 | 1.53E-02 | SUOX                                           | intronic       |
| 4  | 172028775 | C | A | rs35867911  | 1.95E-05 | 0.055 | 0.078 | 0.69 | 0.55 | -0.87 | 3.12E-01 | 0.057 | 0.060 | 0.95 | 0.76 | -1.19 | 0.81 | 1.53E-02 | LOC100506122(dist=48464), MIR6082(dist=78560)  | intergenic     |
| 13 | 91424528  | G | A | rs9523072   | 2.40E-05 | 0.164 | 0.121 | 1.42 | 1.22 | -1.66 | 5.04E-01 | 0.143 | 0.154 | 0.92 | 0.79 | -1.06 | 1.15 | 1.54E-02 | LINC01049(dist=236933), LINC00410(dist=118680) | intergenic     |
| 12 | 67117776  | A | C | rs73327057  | 4.62E-05 | 0.031 | 0.057 | 0.52 | 0.39 | -0.7  | 5.59E-01 | 0.050 | 0.045 | 1.12 | 0.88 | -1.43 | 0.79 | 1.54E-02 | GRIP1(dist=44851), LOC1102724421(dist=353630)  | intergenic     |
| 3  | 109043846 | G | A | rs144630234 | 6.50E-01 | 0.039 | 0.044 | 0.90 | 0.68 | -1.18 | 4.52E-05 | 0.054 | 0.035 | 1.56 | 1.23 | -1.99 | 1.31 | 1.54E-02 | DPPA2(dist=8482), DPPA4(dist=1142)             | intergenic     |
| 6  | 29351136  | C | T | rs238874    | 5.65E-05 | 0.082 | 0.121 | 0.65 | 0.54 | -0.79 | 6.57E-01 | 0.108 | 0.100 | 1.09 | 0.92 | -1.29 | 0.85 | 1.54E-02 | OR12D3(dist=8068), OR12D2(dist=13280)          | intergenic     |
| 7  | 106651787 | C | T | rs10234225  | 1.29E-06 | 0.186 | 0.144 | 1.36 | 1.17 | -1.57 | 1.51E-01 | 0.141 | 0.152 | 0.92 | 0.79 | -1.06 | 1.15 | 1.54E-02 | PIK3CG(dist=102364), PRKAR2B(dist=33391)       | intergenic     |
| 6  | 32456928  | C | T | rs76224106  | 4.40E-05 | 0.102 | 0.129 | 0.77 | 0.64 | -0.91 | 6.25E-01 | 0.120 | 0.121 | 0.99 | 0.85 | -1.17 | 0.82 | 1.55E-02 | HLA-DRA(dist=44102), HLA-DRB5(dist=28226)      | intergenic     |
| 20 | 2112292   | C | T | rs116135359 | 8.33E-01 | 0.040 | 0.042 | 0.94 | 0.71 | -1.24 | 4.88E-05 | 0.042 | 0.024 | 1.78 | 1.34 | -2.35 | 1.33 | 1.55E-02 | STK35                                          | intronic       |
| 13 | 91424214  | T | C | rs9301691   | 2.44E-05 | 0.164 | 0.121 | 1.42 | 1.22 | -1.66 | 5.05E-01 | 0.143 | 0.154 | 0.92 | 0.79 | -1.06 | 1.15 | 1.55E-02 | LINC01049(dist=236619), LINC00410(dist=118994) | intergenic     |
| 20 | 53284144  | A | C | rs6023474   | 5.40E-01 | 0.214 | 0.212 | 0.99 | 0.87 | -1.13 | 5.31E-05 | 0.159 | 0.196 | 1.29 | 1.12 | -1.48 | 1.13 | 1.55E-02 | DOK5(dist=16434), LINC01441(dist=752730)       | intergenic     |
| 3  | 36825533  | G | A | rs1472863   | 5.98E-01 | 0.093 | 0.096 | 1.03 | 0.86 | -1.25 | 5.50E-05 | 0.140 | 0.112 | 0.78 | 0.67 | -0.9  | 0.85 | 1.56E-02 | DCLK3(dist=44181), TRANK1(dist=42775)          | intergenic     |
| 13 | 91423971  | T | A | rs9301690   | 2.48E-05 | 0.164 | 0.121 | 1.42 | 1.22 | -1.66 | 5.05E-01 | 0.143 | 0.154 | 0.92 | 0.79 | -1.06 | 1.15 | 1.56E-02 | LINC01049(dist=236376), LINC00410(dist=119237) | intergenic     |
| 19 | 16087057  | C | T | rs28739565  | 4.27E-05 | 0.317 | 0.273 | 1.23 | 1.09 | -1.39 | 2.93E-01 | 0.242 | 0.242 | 1.00 | 0.89 | -1.13 | 1.13 | 1.56E-02 | OR10H4(dist=26289), LINC00661(dist=39387)      | intergenic     |
| 1  | 108581907 | G | A | rs4626916   | 6.67E-01 | 0.407 | 0.412 | 0.98 | 0.87 | -1.09 | 6.17E-05 | 0.432 | 0.386 | 1.21 | 1.09 | -1.35 | 1.11 | 1.56E-02 | VAV3-AS1(dist=44678), SLC25A24(dist=95437)     | intergenic     |
| 13 | 91423878  | A | C | rs9301689   | 2.49E-05 | 0.164 | 0.121 | 1.42 | 1.22 | -1.66 | 5.05E-01 | 0.143 | 0.154 | 0.92 | 0.79 | -1.06 | 1.15 | 1.56E-02 | LINC01049(dist=236283), LINC00410(dist=119330) | intergenic     |
| 11 | 7810326   | G | A | rs113537757 | 3.23E-01 | 0.463 | 0.485 | 0.92 | 0.82 | -1.02 | 1.08E-05 | 0.516 | 0.452 | 1.29 | 1.16 | -1.43 | 1.10 | 1.57E-02 | OVCH2(dist=82385), OR5P2(dist=7195)            | intergenic     |
| 11 | 8463014   | G | A | rs7130983   | 7.07E-01 | 0.023 | 0.025 | 0.92 | 0.64 | -1.32 | 6.43E-05 | 0.035 | 0.021 | 1.70 | 1.26 | -2.31 | 1.42 | 1.58E-02 | STK33                                          | intronic       |
| 8  | 3119065   | G | A | rs7820340   | 6.20E-01 | 0.312 | 0.322 | 1.04 | 0.93 | -1.17 | 5.62E-05 | 0.338 | 0.284 | 0.78 | 0.7  | -0.87 | 0.90 | 1.59E-02 | CSMD1                                          | intronic       |
| 10 | 52002204  | C | A | rs7076242   | 6.21E-05 | 0.539 | 0.465 | 0.74 | 0.67 | -0.83 | 8.83E-01 | 0.489 | 0.478 | 1.04 | 0.94 | -1.16 | 0.90 | 1.59E-02 | ASAH2                                          | intronic       |
| 11 | 8520408   | G | A | rs7118501   | 3.08E-01 | 0.309 | 0.327 | 0.92 | 0.82 | -1.03 | 6.29E-06 | 0.339 | 0.287 | 1.28 | 1.14 | -1.43 | 1.11 | 1.59E-02 | STK33                                          | intronic       |
| 10 | 51532751  | G | A | rs4630241   | 6.25E-05 | 0.243 | 0.184 | 1.42 | 1.24 | -1.62 | 9.21E-01 | 0.219 | 0.228 | 0.95 | 0.84 | -1.08 | 1.13 | 1.60E-02 | TIMM23B                                        | intronic       |
| 5  | 3353173   | A | T | rs116319755 | 7.95E-01 | 0.040 | 0.043 | 0.94 | 0.71 | -1.23 | 5.66E-05 | 0.053 | 0.035 | 1.56 | 1.22 | -1.99 | 1.34 | 1.60E-02 | LINC01377(dist=171827), LINC01019(dist=64093)  | intergenic     |
| 4  | 92464138  | C | G | rs9995601   | 3.11E-01 | 0.078 | 0.087 | 0.89 | 0.73 | -1.09 | 1.50E-05 | 0.113 | 0.078 | 1.51 | 1.27 | -1.79 | 1.19 | 1.61E-02 | CCSER1                                         | intronic       |
| 21 | 40392366  | T | C | rs73366874  | 3.21E-05 | 0.172 | 0.218 | 0.75 | 0.65 | -0.86 | 4.01E-01 | 0.187 | 0.176 | 1.08 | 0.95 | -1.24 | 0.88 | 1.62E-02 | LOC101928435(dist=42666), PSMG1(dist=155006)   | intergenic     |
| 8  | 3117292   | G | A | rs1444615   | 3.40E-01 | 0.311 | 0.327 | 1.08 | 0.96 | -1.21 | 5.52E-06 | 0.350 | 0.290 | 0.76 | 0.68 | -0.85 | 0.90 | 1.63E-02 | CSMD1                                          | intronic       |
| 15 | 48796337  | C | T | rs12904033  | 4.37E-05 | 0.469 | 0.423 | 1.21 | 1.08 | -1.35 | 4.47E-01 | 0.419 | 0.416 | 1.01 | 0.91 | -1.12 | 1.10 | 1.64E-02 | FBN1                                           | intronic       |
| 6  | 32523492  | G | C | rs115839012 | 2.44E-05 | 0.044 | 0.059 | 0.73 | 0.57 | -0.95 | 1.34E-02 | 0.055 | 0.071 | 0.76 | 0.61 | -0.95 | 0.69 | 1.66E-02 | HLA-DRB6                                       | ncRNA_intronic |
| 5  | 66021794  | T | G | rs57098301  | 5.02E-05 | 0.036 | 0.020 | 1.80 | 1.29 | -2.51 | 6.64E-01 | 0.026 | 0.027 | 0.95 | 0.69 | -1.32 | 1.37 | 1.66E-02 | MAST4                                          | intronic       |
| 13 | 110624272 | G | A | rs35384359  | 4.12E-05 | 0.092 | 0.111 | 0.82 | 0.68 | -0.98 | 7.76E-01 | 0.143 | 0.152 | 0.93 | 0.8  | -1.08 | 0.86 | 1.66E-02 | IRS2(dist=185358), LINC00396(dist=81360)       | intergenic     |
| 10 | 31856588  | G | T | rs10740846  | 7.13E-06 | 0.148 | 0.094 | 0.60 | 0.51 | -0.71 | 5.49E-01 | 0.136 | 0.150 | 1.12 | 0.97 | -1.3  | 0.84 | 1.66E-02 | ZEB1(dist=37846), ARHGAP12(dist=237738)        | intergenic     |
| 11 | 8504936   | C | T | rs2028881   | 3.81E-01 | 0.252 | 0.268 | 0.92 | 0.81 | -1.04 | 1.27E-05 | 0.286 | 0.237 | 1.29 | 1.15 | -1.45 | 1.12 | 1.67E-02 | STK33                                          | intronic       |
| 18 | 27098396  | C | A | rs138129352 | 6.55E-01 | 0.029 | 0.033 | 0.90 | 0.66 | -1.24 | 3.10E-05 | 0.037 | 0.021 | 1.81 | 1.34 | -2.44 | 1.38 | 1.70E-02 | CDH2(dist=1340951), MIR302F(dist=780480)       | intergenic     |
| 13 | 91425454  | T | C | rs9523075   | 2.95E-05 | 0.164 | 0.122 | 1.42 | 1.21 | -1.66 | 5.02E-01 | 0.143 | 0.154 | 0.92 | 0.79 | -1.06 | 1.15 | 1.70E-02 | LINC01049(dist=237859), LINC00410(dist=117754) | intergenic     |
| 8  | 62284796  | T | C | rs111580622 | 6.08E-01 | 0.048 | 0.055 | 0.86 | 0.67 | -1.1  | 3.86E-05 | 0.065 | 0.041 | 1.63 | 1.3  | -2.04 | 1.26 | 1.71E-02 | CLVS1                                          | intronic       |
| 4  | 172004471 | C | T | rs1508295   | 5.33E-05 | 0.054 | 0.075 | 0.71 | 0.56 | -0.89 | 4.03E-01 | 0.054 | 0.057 | 0.93 | 0.74 | -1.17 | 0.82 | 1.71E-02 | LOC100506122(dist=24160), MIR6082(dist=102864) | intergenic     |
| 2  | 102960281 | C | G | rs3821204   | 4.24E-01 | 0.101 | 0.086 | 1.19 | 0.99 | -1.43 | 4.12E-05 | 0.080 | 0.120 | 0.64 | 0.53 | -0.77 | 0.85 | 1.72E-02 | IL1RL1                                         | UTR3           |
| 2  | 102960007 | G | A | rs12905     | 4.24E-01 | 0.101 | 0.086 | 1.19 | 0.99 | -1.44 | 4.14E-05 | 0.080 | 0.119 | 0.64 | 0.53 | -0.77 | 0.85 | 1.73E-02 | IL1RL1                                         | UTR3           |
| 20 | 53283487  | A | G | rs6068935   | 4.95E-01 | 0.216 | 0.213 | 0.98 | 0.86 | -1.12 | 5.21E-05 | 0.161 | 0.199 | 1.29 | 1.12 | -1.48 | 1.13 | 1.74E-02 | DOK5(dist=15777), LINC01441(dist=753387)       | intergenic     |
| 5  | 168832600 | A | T | rs76135517  | 3.18E-01 | 0.075 | 0.085 | 0.88 | 0.72 | -1.08 | 1.55E-06 | 0.088 | 0.059 | 1.54 | 1.27 | -1.87 | 1.26 | 1.74E-02 | SLIT3(dist=104467), SPDL1(dist=178038)         | intergenic     |
| 13 | 91420787  | A | C | rs7330481   | 3.27E-05 | 0.164 | 0.122 | 1.41 | 1.21 | -1.65 | 5.06E-01 | 0.144 | 0.155 | 0.92 | 0.79 | -1.06 | 1.15 | 1.75E-02 | LINC01049(dist=233192), LINC00410(dist=122421) | intergenic     |
| 10 | 51489367  | C | T | rs2843566   | 3.37E-05 | 0.269 | 0.214 | 1.35 | 1.19 | -1.54 | 7.18E-01 | 0.269 | 0.281 | 0.94 | 0.84 | -1.06 | 1.15 | 1.75E-02 | TIMM23B                                        | intronic       |
| 6  | 75030959  | C | A | rs4708145   | 5.84E-01 | 0.445 | 0.447 | 0.99 | 0.89 | -1.11 | 5.97E-05 | 0.387 | 0.423 | 0.86 | 0.78 | -0.96 | 0.90 | 1.76E-02 | LOC101928516                                   | ncRNA_intronic |
| 13 | 91422002  | C | T | rs7336900   | 3.54E-05 | 0.162 | 0.121 | 1.41 | 1.21 | -1.65 | 5.19E-01 | 0.143 | 0.154 | 0.92 | 0.79 | -1.06 | 1.15 | 1.76E-02 | LINC01049(dist=234407), LINC00410(dist=121206) | intergenic     |
| 6  | 22451352  | G | A | rs143469084 | 5.98E-05 | 0.095 | 0.071 | 1.38 | 1.13 | -1.68 | 5.44E-01 | 0.066 | 0.065 | 1.01 | 0.81 | -1.24 | 1.21 | 1.76E-02 | PRL(dist=148270), HDGF11(dist=118326)          | intergenic     |
| 14 | 80796367  | T | A | rs2371289   | 4.35E-01 | 0.189 | 0.183 | 1.04 | 0.91 | -1.2  | 6.39E-05 | 0.251 | 0.227 | 1.14 | 1.01 | -1.29 | 1.13 | 1.77E-02 | DIO2-AS1                                       | ncRNA_intronic |
| 15 | 48789634  | T | C | rs140605    | 4.59E-05 | 0.408 | 0.454 | 1.21 | 1.08 | -1.35 | 4.47E-01 | 0.461 | 0.463 | 1.01 | 0.91 | -1.12 | 1.10 | 1.77E-02 | FBN1                                           | intronic       |
| 6  | 28840184  | G | A | rs9257307   | 5.66E-05 | 0.052 | 0.083 | 0.60 | 0.48 | -0.75 | 6.30E-01 | 0.076 | 0.071 | 1.06 | 0.87 | -1.3  | 0.82 | 1.78E-02 | LOC401242(dist=8730), HCG14(dist=24123)        | intergenic     |
| 8  | 62266177  | G | A | rs115875046 | 6.27E-01 | 0.049 | 0.057 | 0.87 | 0.68 | -1.11 | 2.93E-05 | 0.065 | 0.041 | 1.63 | 1.3  | -2.04 | 1.26 | 1.80E-02 | CLVS1                                          | intronic       |
| 2  | 158814154 | C | T | rs13032042  | 2.27E-01 | 0.027 | 0.028 | 0.98 | 0.7  | -1.36 | 1.14E-05 | 0.049 | 0.033 | 1.52 | 1.18 | -1.96 | 1.34 | 1.80E-02 | ACVR1(dist=81780), UPP2(dist=37537)            | intergenic     |
| 14 | 30734839  | C | A | rs4981743   | 4.40E-01 | 0.214 | 0.208 | 1.04 | 0.91 | -1.19 | 3.07E-05 | 0.174 | 0.213 | 0.78 | 0.68 | -0.89 | 0.89 | 1.82E-02 | PRKD1(dist=337940), G2E3(dist=293490)          | intergenic     |
| 2  | 102965332 | G | C | rs17027006  | 4.10E-01 | 0.101 | 0.086 | 1.19 | 0.99 | -1.44 | 4.36E-05 | 0.080 | 0.119 | 0.64 | 0.53 | -0.77 | 0.85 | 1.82E-02 | IL1RL1                                         | intronic       |
| 7  | 113522662 | T | C | rs35436835  | 5.06E-01 | 0.307 | 0.316 | 0.96 | 0.85 | -1.08 | 4.42E-05 | 0.340 | 0.292 | 1.25 | 1.12 | -1.4  | 1.11 | 1.83E-02 | PPP1R3A                                        | intronic       |
| 7  | 113524668 | T | C | rs59437547  | 5.04E-01 | 0.307 | 0.315 | 0.96 | 0.85 | -1.08 | 4.39E-05 | 0.340 | 0.292 | 1.25 | 1.12 | -1.4  | 1.11 | 1.84E-02 | PPP1R3A                                        | intronic       |
| 11 | 8504174   | C | G | rs12806736  | 5.31E-01 | 0.329 | 0.337 | 0.96 | 0.86 | -1.08 | 6.35E-05 | 0.361 | 0.319 | 1.20 | 1.08 | -1.34 | 1.11 | 1.84E-02 | STK33                                          | intronic       |
| 2  | 102965871 | C | T | rs12469506  | 4.00E-01 | 0.101 | 0.086 | 1.20 | 0.99 | -1.44 | 4.33E-05 | 0.080 | 0.119 | 0.64 | 0.53 | -0.77 | 0.85 | 1.85E-02 | IL1RL1                                         | intronic       |
| 11 | 7857526   | G | C | rs2361060   | 9.43E-02 | 0.447 | 0.476 | 1.13 | 1.01 | -1.26 | 5.83E-07 | 0.517 | 0.447 |      |      |       |      |          |                                                |                |

|    |           |   |   |                        |          |       |       |      |      |       |          |       |       |      |      |       |      |          |                                                   |                |
|----|-----------|---|---|------------------------|----------|-------|-------|------|------|-------|----------|-------|-------|------|------|-------|------|----------|---------------------------------------------------|----------------|
| 10 | 51535931  | T | C | rs10763539             | 5.05E-05 | 0.238 | 0.182 | 1.40 | 1.23 | -1.6  | 8.35E-01 | 0.218 | 0.227 | 0.94 | 0.83 | -1.07 | 1.13 | 1.89E-02 | TIMM23B                                           | intronic       |
| 10 | 50409099  | G | A | rs12570293             | 2.29E-05 | 0.101 | 0.058 | 1.83 | 1.49 | -2.24 | 7.58E-01 | 0.098 | 0.106 | 0.92 | 0.77 | -1.09 | 1.20 | 1.91E-02 | C10orf128(dist=12654), C10orf71-AS1(dist=95229)   | intergenic     |
| 2  | 102969807 | C | T | rs67723747             | 3.81E-01 | 0.099 | 0.083 | 1.21 | 1    | -1.47 | 4.44E-05 | 0.079 | 0.119 | 0.64 | 0.53 | -0.77 | 0.85 | 1.93E-02 | IL1RL1(dist=1310), IL18R1(dist=2936)              | intergenic     |
| 6  | 29356046  | G | A | rs47111185             | 2.67E-01 | 0.189 | 0.193 | 0.98 | 0.85 | -1.12 | 1.11E-05 | 0.225 | 0.191 | 1.23 | 1.08 | -1.39 | 1.13 | 1.94E-02 | OR12D3(dist=12978), OR12D2(dist=8370)             | intergenic     |
| 7  | 113535598 | T | C | rs73716343             | 4.72E-01 | 0.304 | 0.313 | 0.96 | 0.85 | -1.08 | 3.67E-05 | 0.338 | 0.290 | 1.25 | 1.12 | -1.4  | 1.11 | 1.94E-02 | PPP1R3A                                           | intronic       |
| 6  | 29304547  | A | G | rs3130804              | 4.12E-05 | 0.043 | 0.073 | 0.57 | 0.44 | -0.73 | 5.62E-01 | 0.070 | 0.063 | 1.11 | 0.91 | -1.37 | 0.82 | 1.96E-02 | OR14J1(dist=29115), OR5V1(dist=18460)             | intergenic     |
| 1  | 66364465  | G | T | rs12750939             | 4.59E-01 | 0.077 | 0.074 | 1.04 | 0.85 | -1.28 | 4.42E-05 | 0.124 | 0.105 | 1.20 | 1.02 | -1.41 | 1.20 | 1.97E-02 | PDE4B                                             | intronic       |
| 14 | 80803552  | T | C | rs200592478;rs12888896 | 2.30E-01 | 0.162 | 0.164 | 0.99 | 0.85 | -1.15 | 9.05E-06 | 0.214 | 0.188 | 1.17 | 1.03 | -1.34 | 1.15 | 1.97E-02 | DIO2-AS1                                          | ncRNA_intronic |
| 11 | 7810979   | C | T | rs11499957             | 2.41E-01 | 0.436 | 0.458 | 0.91 | 0.82 | -1.02 | 7.69E-06 | 0.255 | 0.430 | 1.28 | 1.16 | -1.42 | 1.10 | 1.97E-02 | OVCH2(dist=83038), OR5P2(dist=6542)               | intergenic     |
| 3  | 63853423  | T | C | rs832192               | 1.40E-01 | 0.149 | 0.168 | 1.15 | 0.99 | -1.34 | 1.89E-06 | 0.198 | 0.153 | 0.73 | 0.64 | -0.84 | 0.88 | 1.98E-02 | ATXN7                                             | intronic       |
| 8  | 62270018  | T | G | rs7007732;rs551024976  | 5.23E-01 | 0.047 | 0.055 | 0.85 | 0.66 | -1.09 | 2.97E-05 | 0.065 | 0.041 | 1.63 | 1.3  | -2.04 | 1.26 | 1.98E-02 | CLVS1                                             | intronic       |
| 3  | 73447726  | G | T | rs78795849             | 3.33E-01 | 0.090 | 0.102 | 0.88 | 0.73 | -1.06 | 7.38E-06 | 0.108 | 0.074 | 1.51 | 1.27 | -1.8  | 1.18 | 1.99E-02 | PDZRN3                                            | intronic       |
| 11 | 18542538  | C | G | rs11024696             | 3.57E-01 | 0.066 | 0.070 | 0.95 | 0.76 | -1.18 | 2.79E-05 | 0.091 | 0.070 | 1.34 | 1.12 | -1.62 | 1.21 | 1.99E-02 | TSG101                                            | intronic       |
| 16 | 88050653  | T | C | rs6540149              | 2.89E-05 | 0.436 | 0.359 | 1.38 | 1.23 | -1.54 | 5.61E-01 | 0.515 | 0.482 | 0.88 | 0.79 | -0.97 | 1.10 | 2.01E-02 | BANP                                              | intronic       |
| 16 | 77342569  | A | C | rs10514413             | 4.30E-05 | 0.028 | 0.048 | 0.58 | 0.43 | -0.79 | 5.53E-01 | 0.037 | 0.035 | 1.08 | 0.81 | -1.42 | 0.77 | 2.02E-02 | ADAMTS18                                          | intronic       |
| 2  | 158802857 | T | C | rs35211699             | 3.07E-01 | 0.027 | 0.027 | 1.01 | 0.72 | -1.41 | 2.42E-05 | 0.045 | 0.030 | 1.53 | 1.17 | -1.99 | 1.34 | 2.02E-02 | ACVR1(dist=70483), UPP2(dist=48834)               | intergenic     |
| 10 | 131147153 | G | A | rs10829593             | 2.73E-01 | 0.192 | 0.199 | 0.96 | 0.83 | -1.1  | 1.99E-05 | 0.255 | 0.224 | 1.19 | 1.05 | -1.34 | 1.14 | 2.03E-02 | LINC01163(dist=1031167), MGMT(dist=118301)        | intergenic     |
| 15 | 91493972  | G | A | rs78738339             | 2.72E-01 | 0.029 | 0.034 | 0.84 | 0.61 | -1.15 | 8.05E-07 | 0.045 | 0.029 | 1.59 | 1.22 | -2.07 | 1.38 | 2.03E-02 | UNC45A                                            | intronic       |
| 7  | 113515745 | T | C | rs2974941              | 4.69E-01 | 0.304 | 0.313 | 0.96 | 0.85 | -1.08 | 4.47E-05 | 0.340 | 0.292 | 1.25 | 1.12 | -1.4  | 1.11 | 2.04E-02 | LINC00998(dist=757108), PPP1R3A(dist=1137)        | intergenic     |
| 7  | 113516616 | T | C | rs2968845              | 4.68E-01 | 0.304 | 0.313 | 1.04 | 0.93 | -1.18 | 4.58E-05 | 0.339 | 0.291 | 0.80 | 0.72 | -0.89 | 0.90 | 2.06E-02 | PPP1R3A                                           | downstream     |
| 2  | 63268355  | T | C | rs12620918             | 3.60E-01 | 0.127 | 0.116 | 1.10 | 0.93 | -1.3  | 4.97E-05 | 0.114 | 0.152 | 0.72 | 0.61 | -0.84 | 0.87 | 2.07E-02 | EHBP1                                             | intronic       |
| 2  | 172376961 | G | A | rs72884317             | 1.84E-01 | 0.024 | 0.023 | 1.02 | 0.71 | -1.46 | 5.38E-06 | 0.043 | 0.029 | 1.52 | 1.16 | -1.99 | 1.40 | 2.09E-02 | DCAF17(dist=35399), CYBRD1(dist=1796)             | intergenic     |
| 11 | 88082778  | A | G | rs7116555              | 5.66E-06 | 0.188 | 0.152 | 1.29 | 1.11 | -1.49 | 2.45E-01 | 0.161 | 0.162 | 0.99 | 0.86 | -1.14 | 1.14 | 2.10E-02 | CTSC(dist=11837), GRM5(dist=154966)               | intergenic     |
| 4  | 58248526  | T | A | rs61357246             | 5.09E-01 | 0.029 | 0.033 | 0.87 | 0.63 | -1.2  | 3.14E-05 | 0.040 | 0.022 | 1.84 | 1.38 | -2.45 | 1.32 | 2.10E-02 | IGFBP7-AS1(dist=177061), LOC101928851(dist=43512) | intergenic     |
| 4  | 15986168  | T | A | rs56331443             | 4.12E-01 | 0.028 | 0.028 | 0.98 | 0.71 | -1.37 | 5.31E-05 | 0.037 | 0.026 | 1.46 | 1.09 | -1.94 | 1.40 | 2.10E-02 | PROM1                                             | intronic       |
| 5  | 85771172  | C | T | rs1546254;rs543811812  | 5.50E-01 | 0.079 | 0.085 | 1.08 | 0.88 | -1.32 | 3.23E-05 | 0.097 | 0.072 | 0.72 | 0.6  | -0.86 | 0.82 | 2.11E-02 | NBPF22P(dist=177807), COX7C(dist=142612)          | intergenic     |
| 11 | 88069563  | C | A | rs150232776            | 4.37E-05 | 0.068 | 0.047 | 1.48 | 1.17 | -1.87 | 4.47E-01 | 0.061 | 0.061 | 1.00 | 0.8  | -1.24 | 1.24 | 2.12E-02 | CTSC                                              | intronic       |
| 7  | 113520262 | C | T | rs11973095             | 4.63E-01 | 0.304 | 0.313 | 0.96 | 0.85 | -1.08 | 4.70E-05 | 0.339 | 0.291 | 1.25 | 1.12 | -1.4  | 1.11 | 2.12E-02 | PPP1R3A                                           | intronic       |
| 8  | 3118494   | T | C | rs9644333              | 3.70E-01 | 0.296 | 0.310 | 1.07 | 0.95 | -1.21 | 1.58E-05 | 0.333 | 0.276 | 0.77 | 0.68 | -0.86 | 0.90 | 2.13E-02 | CSMD1                                             | intronic       |
| 17 | 40375281  | T | G | rs114196602            | 7.22E-01 | 0.025 | 0.027 | 0.93 | 0.66 | -1.3  | 3.11E-05 | 0.034 | 0.020 | 1.69 | 1.24 | -2.3  | 1.43 | 2.13E-02 | STAT5B                                            | intronic       |
| 7  | 113513612 | C | A | rs2974946              | 4.58E-01 | 0.303 | 0.313 | 0.96 | 0.85 | -1.08 | 4.44E-05 | 0.343 | 0.295 | 1.25 | 1.12 | -1.39 | 1.11 | 2.13E-02 | LINC00998(dist=754975), PPP1R3A(dist=3270)        | intergenic     |
| 7  | 106653143 | A | G | rs79508051             | 9.14E-06 | 0.185 | 0.146 | 1.33 | 1.15 | -1.54 | 1.60E-01 | 0.153 | 0.162 | 0.93 | 0.81 | -1.08 | 1.14 | 2.16E-02 | PIK3CG(dist=103720), PRKAR2B(dist=32035)          | intergenic     |
| 3  | 102978297 | A | G | rs4856140              | 4.15E-05 | 0.431 | 0.370 | 0.77 | 0.69 | -0.86 | 3.87E-01 | 0.396 | 0.412 | 1.07 | 0.96 | -1.19 | 0.91 | 2.22E-02 | ZPLD1(dist=779612), MIR548AB(dist=264580)         | intergenic     |
| 16 | 84534252  | G | C | rs3688681              | 2.09E-01 | 0.295 | 0.265 | 1.16 | 1.03 | -1.31 | 4.96E-05 | 0.261 | 0.320 | 0.75 | 0.67 | -0.84 | 0.89 | 2.22E-02 | TLDC1                                             | intronic       |
| 11 | 18601790  | C | T | rs61884723             | 2.96E-01 | 0.026 | 0.027 | 0.96 | 0.68 | -1.34 | 6.30E-05 | 0.049 | 0.036 | 1.40 | 1.09 | -1.8  | 1.32 | 2.24E-02 | UEVLD                                             | intronic       |
| 15 | 37346476  | G | C | rs386783080;rs8037848  | 5.18E-01 | 0.496 | 0.493 | 0.99 | 0.88 | -1.1  | 3.19E-05 | 0.520 | 0.483 | 1.16 | 1.04 | -1.29 | 1.11 | 2.25E-02 | MEIS2                                             | intronic       |
| 3  | 36828658  | T | C | rs4075977              | 4.57E-01 | 0.088 | 0.092 | 1.05 | 0.87 | -1.27 | 5.72E-05 | 0.134 | 0.107 | 0.77 | 0.66 | -0.91 | 0.85 | 2.26E-02 | DCLK3(dist=47306), TRANK1(dist=39650)             | intergenic     |
| 8  | 3112636   | C | A | rs6995457              | 3.98E-01 | 0.319 | 0.334 | 1.07 | 0.95 | -1.2  | 2.45E-05 | 0.358 | 0.301 | 0.77 | 0.69 | -0.86 | 0.90 | 2.28E-02 | CSMD1                                             | intronic       |
| 3  | 102987771 | C | T | rs1565677              | 4.31E-05 | 0.432 | 0.370 | 0.77 | 0.69 | -0.86 | 3.79E-01 | 0.396 | 0.412 | 1.07 | 0.96 | -1.19 | 0.91 | 2.31E-02 | ZPLD1(dist=789086), MIR548AB(dist=255106)         | intergenic     |
| 8  | 26481974  | G | A | rs17322051             | 3.96E-01 | 0.076 | 0.080 | 0.95 | 0.78 | -1.17 | 2.27E-05 | 0.092 | 0.068 | 1.39 | 1.16 | -1.68 | 1.20 | 2.32E-02 | DPYSL2                                            | intronic       |
| 8  | 60019607  | G | C | rs12674720             | 5.32E-05 | 0.015 | 0.023 | 0.66 | 0.44 | -1.01 | 1.91E-02 | 0.028 | 0.025 | 1.14 | 0.83 | -1.57 | 1.84 | 2.33E-02 | TOX                                               | intronic       |
| 8  | 3936403   | A | G | rs2552142              | 5.21E-05 | 0.400 | 0.345 | 1.27 | 1.13 | -1.42 | 4.75E-01 | 0.386 | 0.405 | 0.92 | 0.83 | -1.03 | 1.11 | 2.34E-02 | CSMD1                                             | intronic       |
| 10 | 32612263  | A | G | rs2505408              | 2.33E-05 | 0.241 | 0.177 | 1.47 | 1.29 | -1.68 | 6.40E-01 | 0.227 | 0.243 | 0.91 | 0.8  | -1.03 | 1.13 | 2.34E-02 | EPC1                                              | intronic       |
| 7  | 113541630 | C | T | rs6466472              | 4.29E-01 | 0.299 | 0.309 | 1.05 | 0.93 | -1.18 | 4.18E-05 | 0.337 | 0.289 | 0.80 | 0.72 | -0.89 | 0.91 | 2.36E-02 | PPP1R3A                                           | intronic       |
| 8  | 86428870  | T | C | rs60457697             | 3.49E-01 | 0.164 | 0.181 | 0.89 | 0.77 | -1.03 | 2.93E-05 | 0.192 | 0.146 | 1.40 | 1.22 | -1.6  | 1.14 | 2.38E-02 | CA2(dist=35149), REXO1L2P(dist=137958)            | intergenic     |
| 18 | 4589960   | T | C | rs1785062              | 5.09E-01 | 0.333 | 0.347 | 0.94 | 0.84 | -1.05 | 2.25E-05 | 0.315 | 0.270 | 1.24 | 1.11 | -1.39 | 1.13 | 2.38E-02 | DLGAP1(dist=134694), C18orf42(dist=553712)        | intergenic     |
| 11 | 7809306   | T | A | rs11500772             | 2.59E-01 | 0.472 | 0.496 | 0.91 | 0.81 | -1.01 | 1.62E-05 | 0.526 | 0.463 | 1.29 | 1.16 | -1.43 | 1.10 | 2.39E-02 | OVCH2(dist=81365), OR5P2(dist=8215)               | intergenic     |
| 11 | 7809039   | C | T | rs12291512             | 2.59E-01 | 0.472 | 0.496 | 0.91 | 0.81 | -1.01 | 1.62E-05 | 0.526 | 0.463 | 1.29 | 1.16 | -1.43 | 1.10 | 2.40E-02 | OVCH2(dist=81098), OR5P2(dist=8482)               | intergenic     |
| 6  | 32459120  | T | C | rs186231674            | 1.34E-05 | 0.084 | 0.105 | 0.78 | 0.65 | -0.95 | 1.98E-02 | 0.099 | 0.116 | 0.84 | 0.71 | -0.99 | 0.76 | 2.40E-02 | HLA-DRA(dist=46294), HLA-DRB5(dist=26034)         | intergenic     |
| 12 | 9060025   | C | T | rs12814670             | 4.84E-05 | 0.139 | 0.093 | 1.57 | 1.33 | -1.87 | 5.53E-01 | 0.130 | 0.150 | 0.85 | 0.73 | -0.99 | 1.15 | 2.40E-02 | A2ML1(dist=30644), PHC1(dist=7291)                | intergenic     |
| 11 | 7809935   | A | C | rs11500776             | 2.58E-01 | 0.472 | 0.496 | 0.91 | 0.81 | -1.01 | 1.60E-05 | 0.525 | 0.462 | 1.29 | 1.16 | -1.43 | 1.10 | 2.41E-02 | OVCH2(dist=81994), OR5P2(dist=7586)               | intergenic     |
| 8  | 5966496   | C | G | rs73660526             | 4.80E-01 | 0.235 | 0.255 | 0.90 | 0.79 | -1.02 | 3.41E-05 | 0.256 | 0.203 | 1.35 | 1.2  | -1.53 | 1.12 | 2.43E-02 | CSMD1(dist=1114168), LOC100287015(dist=294581)    | intergenic     |
| 16 | 50407846  | T | C | rs75032005             | 1.19E-05 | 0.053 | 0.031 | 1.75 | 1.33 | -2.31 | 2.20E-01 | 0.030 | 0.036 | 0.85 | 0.63 | -1.14 | 1.29 | 2.45E-02 | BRD7(dist=5001), NKD1(dist=174395)                | intergenic     |
| 2  | 69835516  | A | G | rs79146779             | 5.29E-05 | 0.047 | 0.029 | 1.63 | 1.22 | -2.17 | 3.97E-01 | 0.031 | 0.034 | 0.92 | 0.69 | -1.24 | 1.29 | 2.46E-02 | AAK1                                              | intronic       |
| 8  | 89298250  | C | T | rs61656674             | 4.14E-01 | 0.105 | 0.104 | 1.02 | 0.85 | -1.21 | 4.80E-05 | 0.076 | 0.102 | 0.73 | 0.6  | -0.88 | 0.86 | 2.47E-02 | MMP16                                             | intronic       |
| 4  | 158550609 | T | C | rs1387994              | 3.94E-05 | 0.415 | 0.360 | 0.79 | 0.71 | -0.89 | 3.26E-01 | 0.367 | 0.380 | 1.05 | 0.95 | -1.17 | 0.91 | 2.50E-02 | LOC340017(dist=53306), FAM198B(dist=495123)       | intergenic     |
| 3  | 63854445  | C | T | rs832193               | 8.53E-02 | 0.153 | 0.174 | 1.16 | 1    | -1.35 | 9.97E-07 | 0.204 | 0.159 | 0.74 | 0.64 | -0.84 | 0.89 | 2.52E-02 | ATXN7                                             | intronic       |
| 11 | 7806994   | T | C | rs12295983             |          |       |       |      |      |       |          |       |       |      |      |       |      |          |                                                   |                |

|    |           |   |   |                        |          |       |       |      |      |       |          |       |       |      |      |       |      |          |                                                   |                |
|----|-----------|---|---|------------------------|----------|-------|-------|------|------|-------|----------|-------|-------|------|------|-------|------|----------|---------------------------------------------------|----------------|
| 21 | 25448939  | T | C | rs1699641              | 5.97E-01 | 0.040 | 0.043 | 0.92 | 0.7  | -1.22 | 3.98E-05 | 0.050 | 0.034 | 1.52 | 1.18 | -1.95 | 1.29 | 2.65E-02 | D21S2088E(dist=691783), LOC101927869(dist=227924) | intergenic     |
| 9  | 76928165  | A | T | rs1931585              | 4.52E-05 | 0.069 | 0.098 | 0.68 | 0.56 | -0.84 | 4.90E-01 | 0.086 | 0.079 | 1.08 | 0.9  | -1.31 | 0.85 | 2.66E-02 | MIR6130                                           | ncRNA_intronic |
| 11 | 7802330   | C | T | rs2100734              | 2.42E-01 | 0.473 | 0.498 | 0.91 | 0.81 | -1.01 | 1.89E-05 | 0.524 | 0.461 | 1.29 | 1.16 | -1.43 | 1.09 | 2.69E-02 | OVCH2(dist=74389), OR5P2(dist=15191)              | intergenic     |
| 4  | 122521660 | T | C | rs4833748              | 2.60E-01 | 0.253 | 0.235 | 1.10 | 0.97 | -1.25 | 4.18E-05 | 0.216 | 0.272 | 0.74 | 0.65 | -0.83 | 0.90 | 2.69E-02 | QRFRP(dist=219479), ANXA5(dist=67492)             | intergenic     |
| 10 | 50411008  | T | C | rs4364980              | 4.12E-05 | 0.098 | 0.056 | 1.83 | 1.49 | -2.26 | 7.07E-01 | 0.092 | 0.101 | 0.91 | 0.76 | -1.09 | 1.19 | 2.71E-02 | C10orf128(dist=14563), C10orf71-AS1(dist=93320)   | intergenic     |
| 4  | 158554149 | C | T | rs6854380              | 4.70E-05 | 0.415 | 0.361 | 0.79 | 0.71 | -0.89 | 3.24E-01 | 0.367 | 0.380 | 1.06 | 0.95 | -1.18 | 0.91 | 2.72E-02 | LOC340017(dist=56846), FAM198B(dist=491583)       | intergenic     |
| 1  | 198334066 | T | G | rs76504062             | 4.81E-05 | 0.039 | 0.023 | 1.74 | 1.26 | -2.39 | 5.05E-01 | 0.029 | 0.031 | 0.96 | 0.7  | -1.3  | 1.31 | 2.73E-02 | NEK7(dist=42518), ATP6V1G3(dist=158286)           | intergenic     |
| 8  | 13269694  | A | C | rs17817461             | 3.11E-05 | 0.078 | 0.051 | 1.58 | 1.26 | -1.97 | 2.81E-01 | 0.074 | 0.084 | 0.88 | 0.72 | -1.07 | 1.23 | 2.74E-02 | DLC1                                              | intronic       |
| 11 | 7802304   | C | T | rs2062148              | 2.45E-01 | 0.470 | 0.495 | 0.91 | 0.81 | -1.01 | 1.89E-05 | 0.524 | 0.461 | 1.29 | 1.16 | -1.43 | 1.09 | 2.75E-02 | OVCH2(dist=74363), OR5P2(dist=15217)              | intergenic     |
| 14 | 80788145  | A | T | rs12881848             | 2.83E-01 | 0.171 | 0.167 | 1.03 | 0.89 | -1.19 | 5.28E-05 | 0.238 | 0.215 | 1.14 | 1.01 | -1.29 | 1.13 | 2.75E-02 | DIO2-AS1                                          | ncRNA_intronic |
| 3  | 102998357 | T | C | rs9790025              | 3.69E-05 | 0.430 | 0.368 | 0.77 | 0.69 | -0.86 | 3.13E-01 | 0.391 | 0.409 | 1.08 | 0.97 | -1.2  | 0.91 | 2.76E-02 | ZPLD1(dist=799672), MIR548AB(dist=244520)         | intergenic     |
| 2  | 207763631 | T | C | rs144260439            | 4.32E-05 | 0.038 | 0.022 | 1.76 | 1.27 | -2.44 | 4.47E-01 | 0.027 | 0.029 | 0.92 | 0.67 | -1.26 | 1.32 | 2.78E-02 | FASTKD2(dist=102720), CPO(dist=40647)             | intergenic     |
| 4  | 58256071  | A | G | rs139393118            | 4.82E-01 | 0.030 | 0.034 | 0.86 | 0.63 | -1.18 | 4.29E-05 | 0.040 | 0.023 | 1.80 | 1.35 | -2.4  | 1.30 | 2.81E-02 | IGFBP7-AS1(dist=184606), LOC101928851(dist=35967) | intergenic     |
| 8  | 18896866  | T | A | rs975095               | 3.89E-01 | 0.149 | 0.133 | 0.87 | 0.75 | -1.02 | 4.17E-05 | 0.124 | 0.168 | 1.43 | 1.23 | -1.67 | 1.14 | 2.86E-02 | PSD3(dist=25670), LOC100128993(dist=144320)       | intergenic     |
| 9  | 102452996 | G | A | rs111701716            | 5.47E-05 | 0.045 | 0.025 | 1.80 | 1.33 | -2.44 | 2.03E-01 | 0.028 | 0.031 | 0.90 | 0.66 | -1.23 | 1.32 | 2.88E-02 | LOC101928438                                      | ncRNA_intronic |
| 10 | 50384547  | C | T | rs55908723             | 2.64E-05 | 0.102 | 0.058 | 1.84 | 1.5  | -2.25 | 6.09E-01 | 0.093 | 0.103 | 0.89 | 0.74 | -1.06 | 1.19 | 2.89E-02 | C10orf128                                         | intronic       |
| 19 | 30033739  | T | C | rs79364176             | 7.74E-06 | 0.079 | 0.055 | 1.47 | 1.18 | -1.83 | 1.52E-01 | 0.062 | 0.067 | 0.92 | 0.74 | -1.14 | 1.23 | 2.90E-02 | VSTM2B                                            | intronic       |
| 5  | 86222404  | T | C | rs115422180            | 1.14E-05 | 0.016 | 0.035 | 0.44 | 0.3  | -0.65 | 1.19E-01 | 0.034 | 0.027 | 1.27 | 0.95 | -1.7  | 0.75 | 2.93E-02 | LOC100505878(dist=176815), MIR4280(dist=188292)   | intergenic     |
| 9  | 81530728  | A | G | rs73465949             | 5.62E-05 | 0.118 | 0.162 | 0.69 | 0.59 | -0.81 | 4.44E-01 | 0.142 | 0.129 | 1.12 | 0.96 | -1.3  | 0.88 | 2.94E-02 | PSAT1(dist=585719), LOC101927450(dist=219610)     | intergenic     |
| 9  | 76924441  | G | A | rs11143911             | 3.78E-05 | 0.068 | 0.097 | 0.68 | 0.55 | -0.83 | 4.30E-01 | 0.085 | 0.078 | 1.09 | 0.91 | -1.32 | 0.85 | 2.94E-02 | MIR6130                                           | ncRNA_intronic |
| 11 | 21566468  | T | A | rs10833563             | 3.29E-01 | 0.179 | 0.155 | 1.19 | 1.03 | -1.38 | 5.69E-05 | 0.142 | 0.195 | 0.68 | 0.59 | -0.79 | 0.89 | 2.95E-02 | NELL1                                             | intronic       |
| 6  | 32491314  | A | C | rs116562604            | 6.14E-05 | 0.032 | 0.043 | 0.75 | 0.56 | -1.01 | 2.48E-02 | 0.043 | 0.056 | 0.76 | 0.59 | -0.98 | 0.69 | 2.97E-02 | HLA-DRB5                                          | intronic       |
| 9  | 81536067  | T | C | rs73465986             | 4.92E-05 | 0.119 | 0.164 | 0.69 | 0.59 | -0.81 | 4.29E-01 | 0.142 | 0.129 | 1.12 | 0.96 | -1.3  | 0.88 | 2.97E-02 | PSAT1(dist=591058), LOC101927450(dist=214271)     | intergenic     |
| 4  | 122513549 | A | T | rs12511308             | 2.02E-01 | 0.241 | 0.223 | 1.11 | 0.98 | -1.26 | 3.30E-05 | 0.206 | 0.262 | 0.73 | 0.64 | -0.83 | 0.90 | 2.99E-02 | QRFRP(dist=211368), ANXA5(dist=75603)             | intergenic     |
| 8  | 89317637  | C | T | rs58378440             | 3.68E-01 | 0.108 | 0.106 | 1.02 | 0.86 | -1.22 | 4.57E-05 | 0.079 | 0.104 | 0.74 | 0.61 | -0.89 | 0.86 | 3.01E-02 | MMP16                                             | intronic       |
| 2  | 158825985 | A | G | rs13005189             | 2.02E-01 | 0.028 | 0.029 | 0.97 | 0.7  | -1.35 | 2.57E-05 | 0.046 | 0.031 | 1.50 | 1.16 | -1.95 | 1.31 | 3.01E-02 | ACVRF1(dist=93611), UPP2(dist=25706)              | intergenic     |
| 5  | 37967352  | A | G | rs4072686              | 2.36E-01 | 0.368 | 0.352 | 1.07 | 0.96 | -1.2  | 1.67E-05 | 0.312 | 0.364 | 0.79 | 0.71 | -0.89 | 0.91 | 3.02E-02 | GDNF-AS1(dist=91452), EGFAM(dist=291159)          | intergenic     |
| 8  | 3108085   | T | G | rs78561648             | 2.18E-01 | 0.287 | 0.307 | 1.10 | 0.97 | -1.24 | 9.26E-06 | 0.329 | 0.272 | 0.76 | 0.68 | -0.85 | 0.90 | 3.10E-02 | CSMD1                                             | intronic       |
| 8  | 18898040  | A | G | rs10104732             | 3.47E-01 | 0.146 | 0.129 | 0.87 | 0.74 | -1.01 | 4.41E-05 | 0.125 | 0.170 | 1.43 | 1.22 | -1.66 | 1.14 | 3.14E-02 | PSD3(dist=26844), LOC100128993(dist=143146)       | intergenic     |
| 2  | 158821921 | C | T | rs116697623            | 1.99E-01 | 0.028 | 0.028 | 0.97 | 0.69 | -1.35 | 2.80E-05 | 0.046 | 0.031 | 1.50 | 1.16 | -1.95 | 1.31 | 3.17E-02 | ACVRF1(dist=89547), UPP2(dist=29770)              | intergenic     |
| 6  | 32541377  | T | C | rs9269408              | 6.21E-06 | 0.226 | 0.261 | 0.83 | 0.73 | -0.94 | 2.70E-02 | 0.311 | 0.333 | 0.90 | 0.81 | -1.01 | 0.85 | 3.21E-02 | HLA-DRB6(dist=13598), HLA-DRB1(dist=5170)         | intergenic     |
| 4  | 158544584 | T | C | rs6853516              | 6.32E-05 | 0.428 | 0.377 | 0.81 | 0.72 | -0.9  | 2.86E-01 | 0.388 | 0.404 | 1.07 | 0.96 | -1.19 | 0.91 | 3.23E-02 | LOC340017(dist=47281), FAM198B(dist=501148)       | intergenic     |
| 3  | 63974258  | T | G | rs3774725              | 1.43E-01 | 0.215 | 0.237 | 0.88 | 0.77 | -1    | 1.06E-05 | 0.266 | 0.217 | 1.31 | 1.16 | -1.47 | 1.11 | 3.25E-02 | ATXN7                                             | intronic       |
| 11 | 7810687   | G | C | rs186011709            | 3.27E-01 | 0.438 | 0.458 | 0.92 | 0.82 | -1.03 | 5.98E-05 | 0.490 | 0.434 | 1.25 | 1.13 | -1.39 | 1.10 | 3.25E-02 | OVCH2(dist=82746), OR5P2(dist=6834)               | intergenic     |
| 5  | 37967498  | G | T | rs4072685              | 2.31E-01 | 0.368 | 0.352 | 1.07 | 0.96 | -1.2  | 1.88E-05 | 0.313 | 0.364 | 0.80 | 0.71 | -0.89 | 0.91 | 3.25E-02 | GDNF-AS1(dist=91598), EGFAM(dist=291013)          | intergenic     |
| 9  | 81544405  | T | G | rs73453123             | 3.93E-05 | 0.121 | 0.166 | 0.69 | 0.59 | -0.81 | 3.38E-01 | 0.146 | 0.131 | 1.13 | 0.98 | -1.32 | 0.88 | 3.26E-02 | PSAT1(dist=599396), LOC101927450(dist=205933)     | intergenic     |
| 16 | 75773584  | C | T | rs140193503            | 3.31E-06 | 0.074 | 0.049 | 1.55 | 1.23 | -1.95 | 8.48E-02 | 0.042 | 0.049 | 0.86 | 0.67 | -1.11 | 1.24 | 3.30E-02 | TERF2IP(dist=82243), CNTNAP4(dist=537592)         | intergenic     |
| 11 | 17416125  | G | A | rs17846770             | 3.05E-01 | 0.033 | 0.036 | 0.93 | 0.69 | -1.25 | 3.06E-05 | 0.054 | 0.039 | 1.41 | 1.11 | -1.79 | 1.30 | 3.31E-02 | ABCC8                                             | intronic       |
| 14 | 80792090  | C | T | rs12894797;rs113360620 | 2.52E-01 | 0.180 | 0.176 | 1.03 | 0.89 | -1.19 | 5.93E-05 | 0.240 | 0.217 | 1.14 | 1.01 | -1.29 | 1.12 | 3.32E-02 | DIO2-AS1                                          | ncRNA_intronic |
| 8  | 18897138  | C | G | rs13255941             | 3.75E-01 | 0.149 | 0.132 | 0.87 | 0.74 | -1.02 | 5.39E-05 | 0.124 | 0.168 | 1.43 | 1.22 | -1.66 | 1.14 | 3.32E-02 | PSD3(dist=25942), LOC100128993(dist=144048)       | intergenic     |
| 10 | 110433076 | A | G | rs12261750             | 2.92E-01 | 0.049 | 0.059 | 0.81 | 0.64 | -1.04 | 4.00E-05 | 0.068 | 0.045 | 1.54 | 1.24 | -1.92 | 1.24 | 3.40E-02 | LINC01435(dist=604025), RNU6-53P(dist=497339)     | intergenic     |
| 10 | 50384581  | T | A | rs61848458             | 5.83E-05 | 0.102 | 0.060 | 1.79 | 1.46 | -2.2  | 6.70E-01 | 0.088 | 0.098 | 0.89 | 0.74 | -1.07 | 1.18 | 3.41E-02 | C10orf128                                         | intronic       |
| 7  | 106477445 | A | G | rs7457045              | 3.76E-01 | 0.209 | 0.210 | 0.99 | 0.87 | -1.13 | 3.33E-05 | 0.161 | 0.193 | 0.81 | 0.7  | -0.93 | 0.89 | 3.41E-02 | CCDC71L(dist=175811), PIK3CG(dist=28278)          | intergenic     |
| 5  | 118731273 | A | C | rs1105771              | 6.43E-05 | 0.293 | 0.237 | 1.33 | 1.18 | -1.51 | 3.24E-01 | 0.268 | 0.282 | 0.93 | 0.83 | -1.05 | 1.10 | 3.42E-02 | TNFAIP8                                           | downstream     |
| 11 | 7805861   | A | C | rs11601933             | 2.23E-01 | 0.476 | 0.501 | 0.90 | 0.81 | -1.01 | 2.79E-05 | 0.529 | 0.467 | 1.28 | 1.16 | -1.42 | 1.09 | 3.43E-02 | OVCH2(dist=77920), OR5P2(dist=11660)              | intergenic     |
| 8  | 18899241  | G | A | rs1395518              | 3.69E-01 | 0.148 | 0.131 | 0.87 | 0.74 | -1.02 | 5.52E-05 | 0.129 | 0.172 | 1.41 | 1.21 | -1.64 | 1.13 | 3.44E-02 | PSD3(dist=28045), LOC100128993(dist=141945)       | intergenic     |
| 14 | 33605947  | A | G | rs17100227             | 5.69E-05 | 0.435 | 0.494 | 1.27 | 1.14 | -1.42 | 1.97E-01 | 0.476 | 0.454 | 0.92 | 0.83 | -1.02 | 1.10 | 3.47E-02 | NPAS3                                             | intronic       |
| 6  | 29364838  | C | G | rs2073152              | 9.50E-02 | 0.109 | 0.117 | 0.93 | 0.78 | -1.1  | 8.78E-06 | 0.158 | 0.129 | 1.27 | 1.1  | -1.47 | 1.14 | 3.48E-02 | OR12D2                                            | exonic         |
| 8  | 5966427   | C | G | rs73660525             | 3.95E-01 | 0.220 | 0.241 | 0.89 | 0.78 | -1.01 | 4.40E-05 | 0.242 | 0.190 | 1.36 | 1.2  | -1.54 | 1.11 | 3.50E-02 | CSMD1(dist=1114099), LOC100287015(dist=294650)    | intergenic     |
| 5  | 86194419  | A | G | rs139065562            | 4.78E-06 | 0.017 | 0.038 | 0.43 | 0.3  | -0.63 | 4.10E-02 | 0.036 | 0.027 | 1.34 | 1.01 | -1.79 | 0.76 | 3.51E-02 | LOC100505878(dist=148830), MIR4280(dist=216277)   | intergenic     |
| 4  | 156936029 | A | G | rs7691581              | 2.36E-01 | 0.344 | 0.327 | 1.08 | 0.96 | -1.21 | 4.26E-05 | 0.280 | 0.324 | 0.81 | 0.72 | -0.91 | 0.91 | 3.55E-02 | CTSO(dist=60981), PDGFC(dist=746734)              | intergenic     |
| 6  | 74985342  | C | T | rs9341460              | 2.98E-01 | 0.247 | 0.239 | 1.04 | 0.92 | -1.18 | 5.86E-05 | 0.210 | 0.246 | 0.82 | 0.72 | -0.93 | 0.90 | 3.56E-02 | LOC101928516                                      | ncRNA_intronic |
| 1  | 198462240 | C | A | rs78519086             | 4.80E-05 | 0.041 | 0.024 | 1.78 | 1.3  | -2.44 | 3.37E-01 | 0.028 | 0.031 | 0.92 | 0.67 | -1.25 | 1.28 | 3.59E-02 | NEK7(dist=170692), ATP6V1G3(dist=30112)           | intergenic     |
| 3  | 63948609  | C | G | rs13433909             | 1.07E-01 | 0.198 | 0.220 | 0.87 | 0.76 | -1    | 4.99E-06 | 0.247 | 0.199 | 1.32 | 1.16 | -1.49 | 1.11 | 3.59E-02 | ATXN7                                             | intronic       |
| 8  | 18898681  | G | A | rs2063075              | 3.57E-01 | 0.149 | 0.131 | 0.87 | 0.74 | -1.01 | 5.49E-05 | 0.128 | 0.172 | 1.41 | 1.21 | -1.64 | 1.13 | 3.60E-02 | PSD3(dist=27485), LOC100128993(dist=142505)       | intergenic     |
| 8  | 18898789  | C | A | rs2063076              | 3.33E-01 | 0.147 | 0.130 | 0.86 | 0.74 | -1.01 | 5.45E-05 | 0.128 | 0.172 | 1.41 | 1.   |       |      |          |                                                   |                |



|    |           |   |   |                       |          |       |       |      |      |       |          |       |       |      |      |       |      |          |                                                |                |
|----|-----------|---|---|-----------------------|----------|-------|-------|------|------|-------|----------|-------|-------|------|------|-------|------|----------|------------------------------------------------|----------------|
| 16 | 81798874  | G | C | rs116322606           | 3.24E-02 | 0.028 | 0.021 | 1.33 | 0.94 | -1.89 | 9.71E-06 | 0.035 | 0.025 | 1.43 | 1.06 | -1.92 | 1.55 | 3.95E-02 | CMIP(dist=53507), PLCG2(dist=13989)            | intergenic     |
| 10 | 54917916  | T | G | rs10430535            | 3.51E-05 | 0.394 | 0.335 | 1.29 | 1.15 | -1.44 | 3.86E-01 | 0.351 | 0.366 | 0.94 | 0.84 | -1.04 | 1.10 | 3.97E-02 | MBL2(dist=386456), PCDH15(dist=644617)         | intergenic     |
| 16 | 76246904  | C | G | rs12149782            | 1.10E-01 | 0.237 | 0.255 | 0.91 | 0.8  | -1.03 | 1.25E-05 | 0.286 | 0.240 | 1.27 | 1.13 | -1.42 | 1.10 | 3.99E-02 | TERF2IP(dist=555563), CNTNAP4(dist=64272)      | intergenic     |
| 6  | 29371165  | G | C | rs11362601            | 8.73E-02 | 0.108 | 0.108 | 0.92 | 0.78 | -1.1  | 1.11E-05 | 0.158 | 0.128 | 1.27 | 1.1  | -1.47 | 1.14 | 4.01E-02 | OR12D2(dist=5717), OR11A1(dist=22116)          | intergenic     |
| 14 | 101841010 | C | T | rs76478523            | 1.71E-01 | 0.041 | 0.045 | 0.90 | 0.68 | -1.18 | 4.46E-05 | 0.070 | 0.051 | 1.39 | 1.12 | -1.72 | 1.27 | 4.02E-02 | MEG9(dist=301737), LINC00524(dist=31314)       | intergenic     |
| 1  | 107894526 | C | T | rs12039016            | 5.68E-05 | 0.142 | 0.108 | 1.37 | 1.16 | -1.62 | 2.78E-01 | 0.105 | 0.111 | 0.94 | 0.79 | -1.11 | 1.14 | 4.03E-02 | NTNG1                                          | intronic       |
| 8  | 121818344 | C | T | rs6985486             | 2.88E-01 | 0.480 | 0.486 | 0.98 | 0.87 | -1.09 | 2.17E-05 | 0.393 | 0.421 | 0.89 | 0.8  | -0.99 | 0.91 | 4.03E-02 | SNTB1                                          | intronic       |
| 16 | 81799707  | C | T | rs77678007            | 3.33E-02 | 0.028 | 0.021 | 1.32 | 0.93 | -1.88 | 9.82E-06 | 0.035 | 0.025 | 1.43 | 1.06 | -1.92 | 1.55 | 4.05E-02 | CMIP(dist=54340), PLCG2(dist=13156)            | intergenic     |
| 16 | 81799490  | A | G | rs138625434           | 3.33E-02 | 0.028 | 0.021 | 1.32 | 0.93 | -1.88 | 9.65E-06 | 0.035 | 0.025 | 1.43 | 1.06 | -1.92 | 1.55 | 4.05E-02 | CMIP(dist=54123), PLCG2(dist=13373)            | intergenic     |
| 4  | 122548144 | G | A | rs35294008            | 7.91E-02 | 0.326 | 0.304 | 1.11 | 0.99 | -1.25 | 4.34E-06 | 0.271 | 0.326 | 0.77 | 0.68 | -0.86 | 0.91 | 4.10E-02 | QRFPFR(dist=245963), ANXA5(dist=41008)         | intergenic     |
| 16 | 50410602  | C | A | rs139005242           | 3.35E-05 | 0.051 | 0.030 | 1.74 | 1.32 | -2.31 | 1.94E-01 | 0.027 | 0.033 | 0.83 | 0.61 | -1.13 | 1.26 | 4.11E-02 | BRD7(dist=7757), NKD1(dist=171639)             | intergenic     |
| 11 | 89326344  | T | C | rs141328190           | 1.82E-01 | 0.089 | 0.082 | 1.09 | 0.9  | -1.33 | 3.19E-05 | 0.061 | 0.087 | 0.68 | 0.55 | -0.84 | 0.86 | 4.18E-02 | NOX4(dist=3565), FOLH1B(dist=66121)            | intergenic     |
| 5  | 22237271  | T | C | rs73062563            | 4.51E-01 | 0.027 | 0.032 | 0.85 | 0.61 | -1.17 | 5.61E-05 | 0.038 | 0.022 | 1.78 | 1.32 | -2.39 | 1.30 | 4.19E-02 | CDH12                                          | intronic       |
| 11 | 89326918  | G | A | rs7925554             | 1.82E-01 | 0.089 | 0.082 | 1.09 | 0.9  | -1.33 | 3.18E-05 | 0.061 | 0.087 | 0.68 | 0.55 | -0.84 | 0.86 | 4.19E-02 | NOX4(dist=4139), FOLH1B(dist=65547)            | intergenic     |
| 6  | 29356118  | C | T | rs9380123             | 9.33E-02 | 0.109 | 0.117 | 0.93 | 0.78 | -1.1  | 1.31E-05 | 0.155 | 0.127 | 1.27 | 1.1  | -1.47 | 1.14 | 4.20E-02 | OR12D3(dist=13050), OR12D2(dist=8298)          | intergenic     |
| 5  | 22240444  | C | T | rs73062571            | 4.49E-01 | 0.027 | 0.032 | 0.85 | 0.61 | -1.17 | 5.56E-05 | 0.038 | 0.022 | 1.78 | 1.32 | -2.38 | 1.30 | 4.20E-02 | CDH12                                          | intronic       |
| 16 | 50412541  | C | T | rs114659467           | 3.89E-05 | 0.052 | 0.031 | 1.71 | 1.29 | -2.25 | 2.04E-01 | 0.027 | 0.033 | 0.83 | 0.61 | -1.14 | 1.26 | 4.23E-02 | BRD7(dist=9696), NKD1(dist=169700)             | intergenic     |
| 18 | 7765570   | T | A | rs11663448            | 4.92E-05 | 0.340 | 0.279 | 1.33 | 1.18 | -1.5  | 3.47E-01 | 0.307 | 0.328 | 0.91 | 0.81 | -1.02 | 1.09 | 4.26E-02 | PTPRM                                          | intronic       |
| 10 | 50388908  | C | G | rs7094833             | 4.01E-05 | 0.098 | 0.056 | 1.82 | 1.48 | -2.24 | 5.48E-01 | 0.084 | 0.094 | 0.88 | 0.73 | -1.06 | 1.18 | 4.27E-02 | C10orf128                                      | intronic       |
| 1  | 107892093 | G | A | rs61422607            | 5.90E-05 | 0.142 | 0.108 | 1.37 | 1.16 | -1.61 | 2.61E-01 | 0.103 | 0.110 | 0.93 | 0.79 | -1.11 | 1.14 | 4.33E-02 | NTNG1                                          | intronic       |
| 1  | 107891918 | C | T | rs17018817            | 5.90E-05 | 0.142 | 0.108 | 1.37 | 1.16 | -1.61 | 2.60E-01 | 0.103 | 0.110 | 0.93 | 0.79 | -1.11 | 1.14 | 4.35E-02 | NTNG1                                          | intronic       |
| 18 | 11728168  | A | G | rs12458816            | 5.65E-05 | 0.035 | 0.022 | 1.61 | 1.15 | -2.24 | 3.53E-01 | 0.027 | 0.030 | 0.90 | 0.65 | -1.24 | 1.31 | 4.35E-02 | GNAL                                           | intronic       |
| 9  | 81534958  | G | A | rs3900867             | 5.82E-05 | 0.116 | 0.160 | 0.69 | 0.59 | -0.81 | 2.04E-01 | 0.146 | 0.129 | 1.15 | 0.99 | -1.34 | 0.88 | 4.36E-02 | PSAT1(dist=589949), LOC101927450(dist=215380)  | intergenic     |
| 10 | 101682300 | A | G | rs7077577             | 7.45E-06 | 0.345 | 0.397 | 0.80 | 0.71 | -0.9  | 3.02E-01 | 0.402 | 0.391 | 1.05 | 0.94 | -1.16 | 0.91 | 4.36E-02 | DNMBP                                          | intronic       |
| 5  | 22246467  | C | T | rs73062406            | 4.29E-01 | 0.027 | 0.032 | 0.84 | 0.61 | -1.17 | 5.49E-05 | 0.038 | 0.022 | 1.78 | 1.32 | -2.38 | 1.30 | 4.36E-02 | CDH12                                          | intronic       |
| 1  | 107891357 | C | T | rs11185095            | 5.85E-05 | 0.142 | 0.108 | 1.37 | 1.16 | -1.61 | 2.57E-01 | 0.103 | 0.110 | 0.93 | 0.79 | -1.1  | 1.14 | 4.38E-02 | NTNG1                                          | intronic       |
| 5  | 3355540   | C | T | rs112551664           | 5.33E-01 | 0.039 | 0.043 | 0.92 | 0.7  | -1.21 | 6.11E-05 | 0.049 | 0.033 | 1.50 | 1.17 | -1.94 | 1.31 | 4.38E-02 | LINC01377(dist=174194), LINC01019(dist=61726)  | intergenic     |
| 12 | 96964170  | A | G | rs61940438            | 4.63E-05 | 0.094 | 0.064 | 1.52 | 1.24 | -1.86 | 2.58E-01 | 0.072 | 0.080 | 0.89 | 0.73 | -1.09 | 1.16 | 4.40E-02 | CDK17(dist=169804), NEDD1(dist=336831)         | intergenic     |
| 6  | 41454542  | G | A | rs112004670           | 3.91E-02 | 0.059 | 0.072 | 0.80 | 0.64 | -1    | 4.74E-05 | 0.078 | 0.058 | 1.37 | 1.12 | -1.68 | 0.72 | 4.47E-02 | NCR2(dist=135917), LINC01276(dist=15640)       | intergenic     |
| 12 | 17834537  | A | T | rs115051397           | 4.49E-01 | 0.030 | 0.033 | 0.89 | 0.65 | -1.22 | 6.24E-05 | 0.035 | 0.020 | 1.77 | 1.3  | -2.4  | 1.30 | 4.52E-02 | MIR3974(dist=8209), RERGL(dist=399266)         | intergenic     |
| 1  | 104464617 | A | G | rs11185332            | 7.52E-02 | 0.243 | 0.260 | 0.91 | 0.8  | -1.03 | 5.27E-06 | 0.309 | 0.260 | 1.27 | 1.13 | -1.43 | 1.10 | 4.54E-02 | AMY1A(dist=163306), LOC100129138(dist=151028)  | intergenic     |
| 2  | 208146362 | A | G | rs77463728            | 3.52E-02 | 0.078 | 0.055 | 1.44 | 1.16 | -1.79 | 1.01E-06 | 0.049 | 0.088 | 0.54 | 0.43 | -0.68 | 0.85 | 4.57E-02 | MIR1302-4(dist=12214), CREB1(dist=248254)      | intergenic     |
| 2  | 18497448  | C | A | rs1516919             | 3.35E-01 | 0.383 | 0.375 | 1.04 | 0.93 | -1.16 | 3.12E-05 | 0.330 | 0.374 | 0.83 | 0.74 | -0.92 | 0.92 | 4.59E-02 | KCNS3(dist=383223), RDH14(dist=238541)         | intergenic     |
| 10 | 50132176  | C | T | rs3849151             | 4.92E-05 | 0.294 | 0.235 | 1.35 | 1.2  | -1.53 | 3.91E-01 | 0.280 | 0.297 | 0.92 | 0.82 | -1.03 | 1.11 | 4.63E-02 | WDFY4                                          | intronic       |
| 10 | 42606751  | A | G | rs28404483            | 3.03E-05 | 0.182 | 0.136 | 0.71 | 0.61 | -0.82 | 5.09E-01 | 0.183 | 0.195 | 1.08 | 0.94 | -1.23 | 0.88 | 4.67E-02 | NONE(dist=NONE), LOC441666(dist=220563)        | intergenic     |
| 17 | 33418379  | T | A | rs62062400            | 5.67E-05 | 0.261 | 0.320 | 0.75 | 0.67 | -0.85 | 1.73E-01 | 0.286 | 0.264 | 1.12 | 1    | -1.26 | 0.91 | 4.68E-02 | RAD51L3-RFFL                                   | ncRNA_intronic |
| 8  | 60059341  | G | A | rs28524585            | 6.10E-05 | 0.030 | 0.043 | 0.69 | 0.51 | -0.93 | 4.45E-01 | 0.053 | 0.057 | 0.94 | 0.74 | -1.18 | 0.82 | 4.70E-02 | TOX(dist=27574), CA8(dist=1042082)             | intergenic     |
| 13 | 50109085  | G | A | rs151311812           | 2.88E-01 | 0.029 | 0.034 | 0.85 | 0.62 | -1.16 | 5.68E-05 | 0.042 | 0.025 | 1.71 | 1.3  | -2.26 | 1.29 | 4.78E-02 | RCBTB1                                         | intronic       |
| 5  | 68295773  | A | G | rs6888650             | 2.81E-01 | 0.421 | 0.444 | 1.10 | 0.98 | -1.23 | 3.48E-05 | 0.461 | 0.403 | 0.79 | 0.71 | -0.87 | 0.92 | 4.81E-02 | LOC101928885                                   | ncRNA_intronic |
| 11 | 7857950   | C | T | rs11600477            | 1.45E-01 | 0.341 | 0.361 | 0.92 | 0.82 | -1.03 | 2.20E-05 | 0.392 | 0.337 | 1.27 | 1.14 | -1.41 | 1.09 | 4.85E-02 | OR5P3(dist=10431), OR5E1P(dist=12648)          | intergenic     |
| 2  | 204729153 | C | T | rs231770              | 1.88E-01 | 0.407 | 0.390 | 1.07 | 0.96 | -1.2  | 4.00E-05 | 0.355 | 0.406 | 0.80 | 0.72 | -0.9  | 0.92 | 4.87E-02 | CD28(dist=125517), CTLA4(dist=3358)            | intergenic     |
| 6  | 75009770  | C | T | rs9341463             | 2.12E-01 | 0.251 | 0.240 | 1.06 | 0.93 | -1.2  | 6.39E-05 | 0.213 | 0.249 | 0.82 | 0.72 | -0.92 | 0.91 | 4.90E-02 | LOC101928516                                   | ncRNA_intronic |
| 11 | 62816826  | G | A | rs4963333             | 2.62E-01 | 0.341 | 0.352 | 0.96 | 0.85 | -1.07 | 5.94E-05 | 0.398 | 0.357 | 1.19 | 1.07 | -1.32 | 1.09 | 4.96E-02 | SLC22A8(dist=33509), SLC22A24(dist=30586)      | intergenic     |
| 2  | 102112351 | T | C | rs12712106            | 3.41E-05 | 0.312 | 0.254 | 1.33 | 1.18 | -1.5  | 2.20E-01 | 0.292 | 0.319 | 0.88 | 0.79 | -0.99 | 1.10 | 5.00E-02 | RFX8(dist=21186), MAP4K4(dist=201814)          | intergenic     |
| 6  | 74996947  | G | A | rs73460274            | 1.85E-01 | 0.250 | 0.239 | 1.06 | 0.94 | -1.21 | 5.31E-05 | 0.212 | 0.249 | 0.81 | 0.72 | -0.92 | 0.91 | 5.03E-02 | LOC101928516                                   | ncRNA_intronic |
| 11 | 7855951   | C | T | rs60268423            | 1.36E-01 | 0.342 | 0.363 | 0.91 | 0.81 | -1.02 | 2.07E-05 | 0.394 | 0.339 | 1.27 | 1.14 | -1.41 | 1.09 | 5.03E-02 | OR5P3(dist=8432), OR5E1P(dist=14647)           | intergenic     |
| 8  | 6001215   | T | C | rs2552222;rs570077706 | 3.51E-01 | 0.123 | 0.136 | 0.89 | 0.76 | -1.05 | 3.79E-05 | 0.136 | 0.098 | 1.44 | 1.23 | -1.69 | 1.14 | 5.06E-02 | CSMD1(dist=1148887), LOC100287015(dist=259862) | intergenic     |
| 16 | 81804459  | C | T | rs142105916           | 4.22E-02 | 0.031 | 0.025 | 1.23 | 0.88 | -1.72 | 2.76E-05 | 0.034 | 0.024 | 1.42 | 1.05 | -1.91 | 1.57 | 5.06E-02 | CMIP(dist=59092), PLCG2(dist=8404)             | intergenic     |
| 10 | 101674941 | C | T | rs7894369             | 3.46E-05 | 0.409 | 0.462 | 0.81 | 0.72 | -0.9  | 4.04E-01 | 0.456 | 0.447 | 1.04 | 0.94 | -1.15 | 0.92 | 5.13E-02 | DNMBP                                          | intronic       |
| 12 | 15652220  | A | G | rs2193165             | 1.81E-01 | 0.069 | 0.062 | 0.89 | 0.71 | -1.11 | 3.91E-05 | 0.036 | 0.057 | 1.59 | 1.22 | -2.07 | 1.19 | 5.15E-02 | PTPRO                                          | intronic       |
| 3  | 63897915  | T | C | rs6785040             | 1.47E-01 | 0.254 | 0.278 | 0.88 | 0.78 | -1    | 4.15E-05 | 0.303 | 0.254 | 1.27 | 1.14 | -1.43 | 1.09 | 5.16E-02 | ATXN7                                          | intronic       |
| 10 | 51532528  | G | A | rs4630240             | 3.69E-06 | 0.115 | 0.071 | 1.70 | 1.41 | -2.06 | 2.32E-01 | 0.095 | 0.110 | 0.85 | 0.72 | -1.01 | 1.18 | 5.18E-02 | TIMM23B                                        | intronic       |
| 8  | 43037193  | G | A | rs6990676             | 3.72E-01 | 0.054 | 0.061 | 0.89 | 0.7  | -1.12 | 5.98E-05 | 0.070 | 0.049 | 1.46 | 1.18 | -1.81 | 1.22 | 5.18E-02 | CSMD1                                          | intronic       |
| 10 | 101675129 | A | G | rs10883422;rs35813317 | 1.05E-05 | 0.392 | 0.447 | 0.80 | 0.71 | -0.89 | 2.81E-01 | 0.443 | 0.430 | 1.05 | 0.95 | -1.17 | 0.92 | 5.22E-02 | DNMBP                                          | intronic       |
| 3  | 63948566  | T | C | rs13434089            | 9.26E-02 | 0.187 | 0.211 | 0.86 | 0.75 | -0.98 | 1.13E-05 | 0.234 | 0.188 | 1.32 | 1.16 | -1.5  | 1.10 | 5.24E-02 | ATXN7                                          | intronic       |
| 16 | 81803866  | C | A | rs115241505           | 4.41E-02 | 0.030 | 0.024 | 1.24 | 0.89 | -1.74 | 3.02E-05 | 0.033 | 0.024 | 1.42 | 1.05 | -1.91 | 1.56 | 5.27E-02 | CMIP(dist=58499), PLCG2(dist=8997)             | intergenic     |
| 16 | 50417209  | G | A | rs16948438            | 4.42E-05 | 0.052 | 0.032 | 1.68 | 1.27 | -2.21 | 8.83E-02 | 0.026 | 0.032 | 0.80 | 0.58 | -1.11 |      |          |                                                |                |

|    |           |   |   |                        |          |       |       |      |      |       |          |       |       |      |      |       |      |          |                                                  |                |
|----|-----------|---|---|------------------------|----------|-------|-------|------|------|-------|----------|-------|-------|------|------|-------|------|----------|--------------------------------------------------|----------------|
| 4  | 171998842 | A | G | rs35160188             | 2.42E-05 | 0.052 | 0.074 | 0.68 | 0.54 | -0.86 | 6.06E-02 | 0.065 | 0.064 | 1.02 | 0.83 | -1.26 | 0.85 | 5.39E-02 | LOC100506122(dist=18531), MIR6082(dist=108493)   | intergenic     |
| 5  | 22272943  | C | G | rs113191174            | 3.03E-01 | 0.027 | 0.033 | 0.82 | 0.59 | -1.13 | 3.05E-05 | 0.039 | 0.023 | 1.77 | 1.33 | -2.37 | 1.28 | 5.40E-02 | CDH12                                            | intronic       |
| 3  | 63940509  | C | T | rs9820538              | 5.95E-02 | 0.187 | 0.213 | 0.85 | 0.74 | -0.97 | 3.18E-06 | 0.226 | 0.179 | 1.34 | 1.18 | -1.52 | 1.10 | 5.41E-02 | ATXN7                                            | intronic       |
| 16 | 75779499  | A | C | rs11560081             | 1.02E-05 | 0.078 | 0.053 | 1.50 | 1.2  | -1.87 | 7.21E-02 | 0.045 | 0.052 | 0.86 | 0.67 | -1.1  | 1.21 | 5.44E-02 | TERF2IP(dist=88158), CNTNAP4(dist=531677)        | intergenic     |
| 8  | 60032541  | C | G | rs7837298              | 5.78E-06 | 0.068 | 0.092 | 0.72 | 0.59 | -0.89 | 1.74E-01 | 0.105 | 0.101 | 1.04 | 0.88 | -1.23 | 0.87 | 5.46E-02 | TOX                                              | upstream       |
| 3  | 63947565  | A | C | rs73117082             | 9.21E-02 | 0.187 | 0.212 | 0.86 | 0.75 | -0.98 | 1.28E-05 | 0.233 | 0.187 | 1.32 | 1.16 | -1.49 | 1.10 | 5.50E-02 | ATXN7                                            | intronic       |
| 10 | 101658585 | T | C | rs3740057              | 9.43E-06 | 0.416 | 0.474 | 0.79 | 0.71 | -0.88 | 2.63E-01 | 0.474 | 0.460 | 1.06 | 0.95 | -1.17 | 0.92 | 5.59E-02 | DNMBP                                            | intronic       |
| 4  | 122550874 | G | A | rs4833753              | 1.32E-01 | 0.482 | 0.462 | 1.08 | 0.97 | -1.21 | 2.50E-05 | 0.427 | 0.479 | 0.81 | 0.73 | -0.9  | 0.93 | 5.64E-02 | QRFPR(dist=248693), ANXA5(dist=38278)            | intergenic     |
| 16 | 50423195  | C | T | rs16948448             | 4.04E-05 | 0.052 | 0.032 | 1.65 | 1.26 | -2.17 | 1.49E-01 | 0.025 | 0.031 | 0.81 | 0.59 | -1.12 | 1.25 | 5.69E-02 | BRD7(dist=20350), NKD1(dist=159046)              | intergenic     |
| 3  | 63845411  | C | T | rs9848808              | 2.15E-01 | 0.044 | 0.052 | 0.84 | 0.65 | -1.09 | 4.45E-05 | 0.072 | 0.050 | 1.47 | 1.19 | -1.81 | 1.21 | 5.71E-02 | THOC7                                            | intronic       |
| 16 | 76249115  | C | G | rs9928916              | 7.52E-02 | 0.264 | 0.288 | 0.89 | 0.78 | -1    | 1.91E-05 | 0.314 | 0.265 | 1.27 | 1.13 | -1.42 | 1.09 | 5.77E-02 | TERF2IP(dist=557774), CNTNAP4(dist=62061)        | intergenic     |
| 20 | 24637352  | C | T | rs62215327             | 1.42E-01 | 0.067 | 0.069 | 0.96 | 0.77 | -1.2  | 5.62E-05 | 0.106 | 0.086 | 1.25 | 1.05 | -1.49 | 1.18 | 5.83E-02 | SYNDIG1                                          | intronic       |
| 11 | 7858723   | C | T | rs1380495              | 1.46E-01 | 0.347 | 0.367 | 0.92 | 0.82 | -1.03 | 3.33E-05 | 0.400 | 0.347 | 1.25 | 1.13 | -1.4  | 1.08 | 5.85E-02 | OR5P3(dist=11204), OR5E1P(dist=11875)            | intergenic     |
| 6  | 29894853  | C | T | rs2959825              | 8.05E-02 | 0.202 | 0.190 | 1.08 | 0.94 | -1.24 | 5.16E-05 | 0.186 | 0.219 | 0.82 | 0.72 | -0.93 | 0.90 | 5.87E-02 | HCG4B                                            | ncRNA_exonic   |
| 5  | 22282635  | A | G | rs145269611            | 3.37E-01 | 0.029 | 0.034 | 0.84 | 0.61 | -1.15 | 6.37E-05 | 0.040 | 0.024 | 1.72 | 1.29 | -2.29 | 1.27 | 5.87E-02 | CDH12                                            | intronic       |
| 1  | 104472651 | A | C | rs12142090             | 4.61E-02 | 0.257 | 0.278 | 0.90 | 0.79 | -1.02 | 3.78E-06 | 0.325 | 0.274 | 1.28 | 1.14 | -1.43 | 1.09 | 5.93E-02 | AMY1A(dist=171340), LOC100129138(dist=142994)    | intergenic     |
| 16 | 17861346  | C | T | rs142673782            | 2.30E-01 | 0.056 | 0.066 | 0.84 | 0.67 | -1.06 | 3.76E-05 | 0.070 | 0.046 | 1.55 | 1.25 | -1.92 | 1.20 | 5.95E-02 | XYLT1(dist=296608), NPIPA7(dist=550430)          | intergenic     |
| 10 | 8256509   | G | A | rs139133324            | 2.50E-05 | 0.046 | 0.022 | 2.15 | 1.57 | -2.94 | 2.97E-01 | 0.037 | 0.046 | 0.79 | 0.61 | -1.04 | 1.26 | 5.97E-02 | GATA3(dist=139345), LINC00708(dist=44786)        | intergenic     |
| 10 | 101675130 | G | A | rs35813317;rs10883423  | 2.47E-05 | 0.391 | 0.444 | 0.81 | 0.72 | -0.9  | 3.14E-01 | 0.441 | 0.429 | 1.05 | 0.94 | -1.17 | 0.92 | 5.99E-02 | DNMBP                                            | intronic       |
| 2  | 172389853 | G | A | rs6710032              | 6.93E-02 | 0.018 | 0.021 | 0.89 | 0.59 | -1.32 | 1.34E-05 | 0.041 | 0.028 | 1.49 | 1.13 | -1.96 | 1.33 | 6.03E-02 | CYBRD1                                           | intronic       |
| 2  | 60424353  | A | G | rs7422287              | 1.94E-01 | 0.206 | 0.206 | 1.00 | 0.87 | -1.15 | 3.95E-05 | 0.232 | 0.205 | 1.17 | 1.03 | -1.32 | 1.11 | 6.08E-02 | LOC101927285(dist=917818), MIR4432(dist=190144)  | intergenic     |
| 7  | 95631484  | A | G | rs193309               | 4.68E-01 | 0.041 | 0.047 | 0.88 | 0.67 | -1.15 | 5.26E-05 | 0.047 | 0.030 | 1.60 | 1.23 | -2.07 | 1.25 | 6.11E-02 | DYNC111                                          | intronic       |
| 8  | 3117115   | T | C | rs34604143;rs4433167   | 2.12E-01 | 0.387 | 0.408 | 1.09 | 0.97 | -1.22 | 5.37E-05 | 0.439 | 0.380 | 0.79 | 0.71 | -0.87 | 0.92 | 6.12E-02 | CSMD1                                            | intronic       |
| 16 | 81796597  | G | T | rs148784601            | 5.26E-02 | 0.029 | 0.023 | 1.27 | 0.9  | -1.78 | 1.23E-05 | 0.037 | 0.026 | 1.41 | 1.06 | -1.88 | 1.47 | 6.22E-02 | CMIP(dist=51230), PLCG2(dist=16266)              | intergenic     |
| 10 | 34058250  | A | G | rs76668348;rs139019333 | 4.42E-05 | 0.107 | 0.071 | 1.58 | 1.3  | -1.91 | 3.93E-01 | 0.096 | 0.109 | 0.86 | 0.72 | -1.03 | 1.18 | 6.30E-02 | LINC00838                                        | ncRNA_intronic |
| 19 | 36645683  | G | A | rs148955536            | 1.02E-01 | 0.047 | 0.060 | 0.78 | 0.61 | -1    | 2.19E-05 | 0.074 | 0.051 | 1.49 | 1.21 | -1.84 | 1.21 | 6.31E-02 | COX7A1(dist=1912), ZNF565(dist=27279)            | intergenic     |
| 12 | 44865428  | T | C | rs140922456            | 1.76E-01 | 0.036 | 0.044 | 0.81 | 0.61 | -1.07 | 4.68E-05 | 0.053 | 0.032 | 1.72 | 1.34 | -2.2  | 1.22 | 6.31E-02 | TMEM117(dist=81883), NELL2(dist=36630)           | intergenic     |
| 8  | 60034012  | G | A | rs10094653             | 3.05E-06 | 0.070 | 0.092 | 0.74 | 0.61 | -0.91 | 1.20E-01 | 0.107 | 0.103 | 1.04 | 0.88 | -1.24 | 0.87 | 6.40E-02 | TOX(dist=2245), CA8(dist=1067411)                | intergenic     |
| 8  | 6014159   | T | C | rs2552264              | 1.24E-01 | 0.075 | 0.089 | 0.83 | 0.68 | -1.02 | 4.44E-06 | 0.104 | 0.071 | 1.51 | 1.27 | -1.81 | 1.16 | 6.47E-02 | CSMD1(dist=1161831), LOC100287015(dist=246918)   | intergenic     |
| 6  | 75010403  | A | G | rs9352092              | 1.55E-01 | 0.250 | 0.238 | 1.07 | 0.94 | -1.21 | 6.38E-05 | 0.213 | 0.249 | 0.82 | 0.72 | -0.92 | 0.92 | 6.48E-02 | LOC101928516                                     | ncRNA_intronic |
| 6  | 75003937  | C | A | rs12526986             | 1.31E-01 | 0.246 | 0.231 | 1.08 | 0.95 | -1.23 | 4.87E-05 | 0.206 | 0.242 | 0.81 | 0.71 | -0.92 | 0.92 | 6.67E-02 | LOC101928516                                     | ncRNA_intronic |
| 16 | 81798597  | G | T | rs149847160            | 5.68E-02 | 0.029 | 0.023 | 1.26 | 0.89 | -1.77 | 1.20E-05 | 0.037 | 0.026 | 1.41 | 1.06 | -1.88 | 1.47 | 6.68E-02 | CMIP(dist=53230), PLCG2(dist=14266)              | intergenic     |
| 16 | 14023188  | G | A | rs13136100             | 6.17E-05 | 0.076 | 0.111 | 0.66 | 0.54 | -0.8  | 1.50E-01 | 0.092 | 0.077 | 1.21 | 1.01 | -1.46 | 0.87 | 6.69E-02 | ERCC4                                            | intronic       |
| 6  | 75002053  | A | G | rs9343129              | 1.45E-01 | 0.250 | 0.237 | 1.07 | 0.94 | -1.22 | 6.43E-05 | 0.212 | 0.248 | 0.81 | 0.72 | -0.92 | 0.92 | 6.80E-02 | LOC101928516                                     | ncRNA_intronic |
| 6  | 75011462  | C | T | rs1586598              | 1.41E-01 | 0.250 | 0.237 | 1.07 | 0.94 | -1.22 | 6.14E-05 | 0.212 | 0.249 | 0.81 | 0.72 | -0.92 | 0.92 | 6.85E-02 | LOC101928516                                     | ncRNA_intronic |
| 6  | 75006125  | G | A | rs9352090              | 1.41E-01 | 0.250 | 0.237 | 1.07 | 0.94 | -1.22 | 6.15E-05 | 0.212 | 0.249 | 0.81 | 0.72 | -0.92 | 0.92 | 6.85E-02 | LOC101928516                                     | ncRNA_intronic |
| 1  | 198456576 | C | T | rs79632665             | 6.40E-05 | 0.039 | 0.022 | 1.81 | 1.31 | -2.49 | 1.48E-01 | 0.023 | 0.027 | 0.84 | 0.59 | -1.18 | 1.26 | 6.89E-02 | NEK7(dist=165028), ATP6V1G3(dist=35776)          | intergenic     |
| 10 | 32088412  | G | A | rs7069005              | 2.34E-05 | 0.334 | 0.409 | 0.72 | 0.65 | -0.81 | 2.43E-01 | 0.367 | 0.344 | 1.11 | 0.99 | -1.23 | 0.92 | 6.95E-02 | ZEB1(dist=269670), ARHGAP12(dist=5914)           | intergenic     |
| 10 | 8254435   | C | T | rs72786323             | 3.17E-05 | 0.047 | 0.023 | 2.13 | 1.57 | -2.91 | 2.77E-01 | 0.038 | 0.047 | 0.79 | 0.6  | -1.03 | 1.24 | 6.97E-02 | GATA3(dist=137271), LINC00708(dist=46860)        | intergenic     |
| 3  | 63886515  | T | C | rs864975               | 7.09E-02 | 0.187 | 0.213 | 1.18 | 1.03 | -1.35 | 1.63E-05 | 0.231 | 0.185 | 0.76 | 0.67 | -0.86 | 0.91 | 7.09E-02 | ATXN7                                            | intronic       |
| 18 | 11730847  | C | T | rs114406527            | 1.17E-05 | 0.071 | 0.050 | 1.45 | 1.15 | -1.82 | 1.50E-01 | 0.054 | 0.060 | 0.88 | 0.7  | -1.11 | 1.18 | 7.10E-02 | GNAL                                             | intronic       |
| 8  | 634494    | C | G | rs336440               | 4.50E-05 | 0.028 | 0.051 | 0.54 | 0.4  | -0.72 | 1.88E-01 | 0.051 | 0.041 | 1.25 | 0.98 | -1.59 | 0.83 | 7.24E-02 | ERICH1                                           | intronic       |
| 8  | 6012188   | T | C | rs2570694              | 1.78E-01 | 0.080 | 0.092 | 0.86 | 0.7  | -1.04 | 1.63E-05 | 0.099 | 0.068 | 1.50 | 1.25 | -1.8  | 1.15 | 7.32E-02 | CSMD1(dist=1159860), LOC100287015(dist=248889)   | intergenic     |
| 5  | 92183200  | C | T | rs6888382              | 5.90E-05 | 0.060 | 0.090 | 0.64 | 0.52 | -0.79 | 8.37E-02 | 0.069 | 0.057 | 1.24 | 1.01 | -1.53 | 0.86 | 7.34E-02 | ARRDC3-AS1(dist=1466668), NR2F1-AS1(dist=561862) | intergenic     |
| 12 | 44879323  | C | T | rs114153370            | 1.55E-01 | 0.036 | 0.044 | 0.80 | 0.6  | -1.06 | 4.65E-05 | 0.053 | 0.032 | 1.71 | 1.33 | -2.19 | 1.21 | 7.34E-02 | TMEM117(dist=95778), NELL2(dist=22735)           | intergenic     |
| 8  | 633770    | C | A | rs336443               | 6.42E-05 | 0.030 | 0.053 | 0.55 | 0.41 | -0.73 | 1.81E-01 | 0.051 | 0.041 | 1.25 | 0.98 | -1.59 | 0.83 | 7.43E-02 | ERICH1                                           | intronic       |
| 8  | 74049175  | T | C | rs2383886;rs386726678  | 4.90E-05 | 0.359 | 0.299 | 0.76 | 0.68 | -0.86 | 7.49E-02 | 0.298 | 0.326 | 1.13 | 1.01 | -1.27 | 0.92 | 7.53E-02 | SBSPO1(dist=43668), C8orf89(dist=104484)         | intergenic     |
| 8  | 75910256  | T | A | rs7004616              | 6.49E-05 | 0.154 | 0.120 | 1.33 | 1.14 | -1.56 | 1.36E-01 | 0.121 | 0.133 | 0.90 | 0.77 | -1.05 | 1.11 | 7.57E-02 | CRISPLD1                                         | intronic       |
| 16 | 79595250  | A | G | rs146412242            | 4.83E-05 | 0.062 | 0.041 | 1.53 | 1.2  | -1.97 | 1.58E-01 | 0.038 | 0.043 | 0.88 | 0.67 | -1.15 | 1.19 | 7.59E-02 | WVVOX(dist=348686), MAF(dist=32495)              | intergenic     |
| 13 | 91441129  | G | A | rs272081               | 1.94E-05 | 0.309 | 0.247 | 1.37 | 1.21 | -1.55 | 8.81E-02 | 0.258 | 0.288 | 0.86 | 0.77 | -0.97 | 1.08 | 7.69E-02 | LINC01049(dist=253534), LINC00410(dist=102079)   | intergenic     |
| 3  | 63942188  | C | G | rs28675788             | 7.99E-02 | 0.192 | 0.217 | 0.86 | 0.75 | -0.99 | 2.61E-05 | 0.235 | 0.191 | 1.30 | 1.15 | -1.48 | 1.09 | 7.75E-02 | ATXN7                                            | intronic       |
| 16 | 76248410  | A | G | rs2161638              | 8.71E-02 | 0.278 | 0.302 | 0.89 | 0.79 | -1    | 1.61E-05 | 0.319 | 0.273 | 1.25 | 1.11 | -1.4  | 1.09 | 7.75E-02 | TERF2IP(dist=557069), CNTNAP4(dist=62766)        | intergenic     |
| 3  | 64009102  | G | T | rs35836                | 9.31E-02 | 0.129 | 0.153 | 0.82 | 0.7  | -0.96 | 2.32E-05 | 0.161 | 0.121 | 1.40 | 1.21 | -1.62 | 1.11 | 7.77E-02 | PSMD6                                            | UTR5           |
| 11 | 104420700 | G | A | rs60064090             | 1.07E-01 | 0.266 | 0.247 | 1.11 | 0.98 | -1.25 | 6.14E-05 | 0.211 | 0.252 | 0.79 | 0.7  | -0.9  | 0.92 | 7.88E-02 | MIR7641-1(dist=297321), LOC102723895(dist=18517) | intergenic     |
| 8  | 5977923   | C | A | rs79987071             | 1.76E-01 | 0.108 | 0.126 | 0.85 | 0.71 | -1    | 4.22E-05 | 0.133 | 0.096 | 1.45 | 1.24 | -1.7  | 1.12 | 7.91E-02 | CSMD1(dist=1125595), LOC100287015(dist=283154)   | intergenic     |
| 6  | 74997693  | G | A | rs9341461              | 1.43E-01 | 0.250 | 0.237 | 1.07 | 0.94 | -1.22 | 5.44E-05 | 0.220 | 0.255 | 0.83 | 0.73 | -0.93 | 0.92 | 7.99E-02 | LOC101928516                                     | ncRNA_intronic |
| 3  | 63902629  | G | A | rs6770864              | 5.69E-02 | 0.187 | 0.215 | 0.84 | 0.74 | -0.97 | 1.42E-05 | 0.233 | 0.187 | 1.32 | 1.16 | -1.   |      |          |                                                  |                |

|    |           |   |   |                                   |          |       |       |      |      |       |          |       |       |      |      |       |      |          |                                                  |                |
|----|-----------|---|---|-----------------------------------|----------|-------|-------|------|------|-------|----------|-------|-------|------|------|-------|------|----------|--------------------------------------------------|----------------|
| 11 | 39603673  | A | G | rs80013527                        | 4.11E-05 | 0.042 | 0.028 | 1.52 | 1.13 | -2.05 | 2.24E-01 | 0.034 | 0.037 | 0.92 | 0.69 | -1.22 | 1.25 | 8.22E-02 | LINC01493(dist=926874), LRRC4C(dist=532078)      | intergenic     |
| 2  | 208189865 | C | T | rs59408366                        | 1.25E-01 | 0.144 | 0.126 | 1.16 | 0.99 | -1.36 | 5.38E-05 | 0.112 | 0.149 | 0.72 | 0.61 | -0.85 | 0.90 | 8.23E-02 | MIR1302-4(dist=55717), CREB1(dist=204751)        | intergenic     |
| 3  | 63857071  | G | A | rs832194                          | 5.03E-02 | 0.185 | 0.211 | 1.18 | 1.03 | -1.36 | 1.32E-05 | 0.235 | 0.190 | 0.76 | 0.67 | -0.86 | 0.92 | 8.23E-02 | ATXN7                                            | intronic       |
| 2  | 208190557 | G | A | rs138675833                       | 1.28E-01 | 0.144 | 0.126 | 1.16 | 0.99 | -1.36 | 5.87E-05 | 0.112 | 0.149 | 0.72 | 0.61 | -0.85 | 0.90 | 8.29E-02 | MIR1302-4(dist=56409), CREB1(dist=204059)        | intergenic     |
| 2  | 208189004 | G | C | rs6708803                         | 1.22E-01 | 0.144 | 0.126 | 1.16 | 0.99 | -1.36 | 5.23E-05 | 0.111 | 0.148 | 0.72 | 0.61 | -0.84 | 0.90 | 8.33E-02 | MIR1302-4(dist=54856), CREB1(dist=205612)        | intergenic     |
| 2  | 208189282 | T | C | rs16839629                        | 1.23E-01 | 0.144 | 0.126 | 1.16 | 0.99 | -1.36 | 5.32E-05 | 0.111 | 0.149 | 0.72 | 0.61 | -0.84 | 0.90 | 8.34E-02 | MIR1302-4(dist=55134), CREB1(dist=205334)        | intergenic     |
| 11 | 104436445 | C | T | rs11226428                        | 7.93E-02 | 0.266 | 0.245 | 1.12 | 0.98 | -1.27 | 4.39E-05 | 0.210 | 0.252 | 0.79 | 0.7  | -0.9  | 0.92 | 8.41E-02 | MIR7641-1(dist=313066), LOC102723895(dist=2772)  | intergenic     |
| 10 | 824745    | A | T | rs72786315                        | 4.30E-05 | 0.050 | 0.025 | 2.05 | 1.52 | -2.75 | 2.78E-01 | 0.040 | 0.050 | 0.79 | 0.61 | -1.02 | 1.22 | 8.49E-02 | GATA3(dist=131581), LINC00708(dist=52550)        | intergenic     |
| 10 | 42645582  | A | G | rs11815687                        | 5.62E-05 | 0.160 | 0.122 | 0.73 | 0.62 | -0.85 | 3.01E-01 | 0.155 | 0.166 | 1.08 | 0.94 | -1.25 | 0.88 | 8.50E-02 | NONE(dist=NONE), LOC441666(dist=181732)          | intergenic     |
| 16 | 75689763  | G | A | rs574109873;rs77124775            | 6.38E-05 | 0.081 | 0.056 | 1.49 | 1.2  | -1.85 | 1.98E-01 | 0.057 | 0.064 | 0.88 | 0.71 | -1.1  | 1.15 | 8.54E-02 | TERF2IP                                          | intronic       |
| 1  | 151538366 | G | A | rs3790506                         | 7.94E-02 | 0.137 | 0.116 | 1.21 | 1.03 | -1.43 | 1.62E-05 | 0.157 | 0.139 | 1.16 | 1    | -1.34 | 1.21 | 8.55E-02 | TUFT1                                            | intronic       |
| 16 | 79530566  | T | C | rs10514458                        | 2.69E-05 | 0.114 | 0.089 | 1.32 | 1.1  | -1.58 | 1.32E-01 | 0.084 | 0.089 | 0.94 | 0.78 | -1.13 | 1.16 | 8.66E-02 | WVVOX(dist=284002), MAF(dist=97179)              | intergenic     |
| 3  | 63841942  | T | C | rs832189                          | 4.93E-02 | 0.209 | 0.236 | 1.17 | 1.02 | -1.33 | 1.71E-05 | 0.260 | 0.214 | 0.77 | 0.69 | -0.87 | 0.92 | 8.74E-02 | THOC7                                            | intronic       |
| 8  | 141522710 | C | G | rs74333573                        | 8.36E-02 | 0.035 | 0.045 | 0.78 | 0.59 | -1.04 | 8.40E-06 | 0.045 | 0.032 | 1.45 | 1.12 | -1.89 | 0.75 | 8.81E-02 | CHRC1                                            | intronic       |
| 8  | 60034428  | C | T | rs10808698                        | 8.10E-06 | 0.031 | 0.047 | 0.65 | 0.48 | -0.86 | 1.03E-01 | 0.055 | 0.053 | 1.04 | 0.83 | -1.31 | 0.84 | 8.91E-02 | TOX(dist=2661), CA8(dist=1066995)                | intergenic     |
| 7  | 113476939 | G | A | rs35514509                        | 1.20E-01 | 0.263 | 0.289 | 0.88 | 0.78 | -0.99 | 2.22E-05 | 0.287 | 0.240 | 1.28 | 1.14 | -1.44 | 1.09 | 8.97E-02 | LINC00998(dist=718302), PPP1R3A(dist=39943)      | intergenic     |
| 11 | 104424807 | A | G | rs11226426                        | 7.13E-02 | 0.266 | 0.245 | 1.12 | 0.99 | -1.27 | 4.36E-05 | 0.211 | 0.252 | 0.79 | 0.7  | -0.9  | 0.92 | 9.01E-02 | MIR7641-1(dist=301428), LOC102723895(dist=14410) | intergenic     |
| 10 | 101675641 | T | C | rs12767930                        | 4.00E-05 | 0.433 | 0.487 | 0.81 | 0.72 | -0.9  | 2.47E-01 | 0.480 | 0.465 | 1.06 | 0.96 | -1.18 | 0.93 | 9.13E-02 | DNMBP                                            | intronic       |
| 3  | 63878340  | G | A | rs372095772;rs704362              | 3.25E-02 | 0.209 | 0.239 | 1.18 | 1.04 | -1.35 | 7.46E-06 | 0.261 | 0.213 | 0.76 | 0.68 | -0.86 | 0.92 | 9.23E-02 | ATXN7                                            | intronic       |
| 10 | 42666096  | A | G | rs7084952                         | 3.96E-05 | 0.152 | 0.108 | 0.67 | 0.57 | -0.79 | 2.72E-01 | 0.142 | 0.157 | 1.13 | 0.98 | -1.31 | 0.89 | 9.30E-02 | NONE(dist=NONE), LOC441666(dist=161218)          | intergenic     |
| 1  | 104474710 | G | A | rs34356428                        | 2.19E-02 | 0.244 | 0.268 | 0.88 | 0.78 | -1    | 4.04E-06 | 0.316 | 0.266 | 1.28 | 1.14 | -1.43 | 1.08 | 9.38E-02 | AMY1A(dist=173399), LOC100129138(dist=140935)    | intergenic     |
| 4  | 139631944 | C | G | rs72937607                        | 2.07E-05 | 0.147 | 0.114 | 1.34 | 1.14 | -1.57 | 8.24E-02 | 0.118 | 0.126 | 0.93 | 0.79 | -1.09 | 1.11 | 9.53E-02 | LINC00499(dist=286446), CCRN4L(dist=304969)      | intergenic     |
| 3  | 63891106  | C | T | rs386661726;rs9850682;rs370104712 | 5.90E-02 | 0.185 | 0.211 | 0.84 | 0.74 | -0.97 | 2.53E-05 | 0.227 | 0.183 | 1.31 | 1.16 | -1.49 | 1.09 | 9.61E-02 | ATXN7                                            | intronic       |
| 16 | 79589798  | C | T | rs116555449                       | 5.15E-05 | 0.058 | 0.038 | 1.56 | 1.2  | -2.02 | 1.20E-01 | 0.034 | 0.040 | 0.85 | 0.64 | -1.12 | 1.19 | 9.72E-02 | WVVOX(dist=343234), MAF(dist=37947)              | intergenic     |
| 10 | 50379773  | A | G | rs2002435                         | 1.75E-05 | 0.337 | 0.266 | 0.71 | 0.63 | -0.8  | 1.70E-01 | 0.299 | 0.324 | 1.13 | 1.01 | -1.26 | 0.92 | 9.80E-02 | C10orf128                                        | intronic       |
| 8  | 6009195   | G | C | rs2700822                         | 1.32E-01 | 0.078 | 0.091 | 0.84 | 0.69 | -1.02 | 1.47E-05 | 0.099 | 0.068 | 1.50 | 1.25 | -1.8  | 1.14 | 9.94E-02 | CSMD1(dist=1156867), LOC100287015(dist=251882)   | intergenic     |
| 16 | 79590746  | T | A | rs114592884                       | 5.48E-05 | 0.058 | 0.038 | 1.56 | 1.2  | -2.01 | 1.20E-01 | 0.034 | 0.040 | 0.85 | 0.64 | -1.12 | 1.19 | 9.94E-02 | WVVOX(dist=344182), MAF(dist=36999)              | intergenic     |
| 3  | 63865947  | C | T | rs704374                          | 3.21E-02 | 0.184 | 0.212 | 1.20 | 1.04 | -1.37 | 9.31E-06 | 0.234 | 0.188 | 0.76 | 0.67 | -0.86 | 0.92 | 9.95E-02 | ATXN7                                            | intronic       |
| 3  | 63827381  | G | A | rs13059603                        | 8.97E-02 | 0.208 | 0.229 | 1.13 | 0.99 | -1.29 | 4.10E-05 | 0.259 | 0.220 | 0.81 | 0.72 | -0.91 | 0.92 | 9.97E-02 | C3orf49                                          | ncRNA_intronic |
| 8  | 60037660  | C | G | rs12334865                        | 8.55E-06 | 0.032 | 0.048 | 0.65 | 0.49 | -0.87 | 1.03E-01 | 0.056 | 0.054 | 1.04 | 0.83 | -1.31 | 0.85 | 9.99E-02 | TOX(dist=5893), CA8(dist=1063763)                | intergenic     |
| 3  | 63841395  | T | C | rs832188                          | 4.63E-02 | 0.193 | 0.219 | 1.17 | 1.02 | -1.34 | 2.29E-05 | 0.243 | 0.199 | 0.77 | 0.68 | -0.88 | 0.92 | 1.00E-01 | THOC7                                            | intronic       |
| 16 | 79591823  | A | G | rs77828881                        | 6.09E-05 | 0.057 | 0.038 | 1.55 | 1.2  | -2.01 | 1.25E-01 | 0.034 | 0.040 | 0.85 | 0.64 | -1.12 | 1.19 | 1.00E-01 | WVVOX(dist=345259), MAF(dist=35922)              | intergenic     |
| 3  | 63865531  | A | G | rs832199                          | 3.23E-02 | 0.184 | 0.212 | 1.20 | 1.04 | -1.37 | 9.77E-06 | 0.234 | 0.188 | 0.76 | 0.67 | -0.86 | 0.92 | 1.01E-01 | ATXN7                                            | intronic       |
| 10 | 101672854 | C | G | rs7093297                         | 1.87E-05 | 0.421 | 0.477 | 0.80 | 0.71 | -0.89 | 1.48E-01 | 0.479 | 0.461 | 1.07 | 0.97 | -1.19 | 0.94 | 1.07E-01 | DNMBP                                            | intronic       |
| 6  | 114403049 | A | C | rs915202                          | 8.28E-02 | 0.290 | 0.310 | 0.91 | 0.81 | -1.02 | 5.40E-05 | 0.336 | 0.294 | 1.21 | 1.09 | -1.36 | 1.08 | 1.08E-01 | LOC101927768                                     | ncRNA_intronic |
| 6  | 114400462 | C | G | rs35877583                        | 8.06E-02 | 0.289 | 0.309 | 0.91 | 0.8  | -1.02 | 5.37E-05 | 0.336 | 0.294 | 1.21 | 1.09 | -1.36 | 1.07 | 1.10E-01 | LOC101927768                                     | ncRNA_intronic |
| 10 | 101662514 | G | A | rs12762327                        | 2.72E-05 | 0.390 | 0.444 | 0.80 | 0.72 | -0.9  | 1.70E-01 | 0.446 | 0.428 | 1.07 | 0.97 | -1.19 | 0.94 | 1.12E-01 | DNMBP                                            | intronic       |
| 8  | 6006939   | A | G | rs2700727                         | 1.13E-01 | 0.078 | 0.093 | 0.83 | 0.68 | -1.01 | 1.67E-05 | 0.100 | 0.069 | 1.50 | 1.25 | -1.8  | 1.13 | 1.16E-01 | CSMD1(dist=1154611), LOC100287015(dist=254138)   | intergenic     |
| 10 | 101662477 | C | G | rs12761972                        | 4.94E-05 | 0.401 | 0.454 | 0.81 | 0.72 | -0.9  | 1.91E-01 | 0.454 | 0.437 | 1.07 | 0.96 | -1.19 | 0.94 | 1.18E-01 | DNMBP                                            | intronic       |
| 2  | 208173545 | A | G | rs16839586                        | 9.08E-02 | 0.160 | 0.139 | 1.18 | 1.01 | -1.37 | 5.96E-05 | 0.113 | 0.152 | 0.71 | 0.6  | -0.83 | 0.91 | 1.18E-01 | MIR1302-4(dist=39397), CREB1(dist=221071)        | intergenic     |
| 8  | 3117114   | G | T | rs1442394;rs34604143              | 1.06E-01 | 0.370 | 0.396 | 1.12 | 1    | -1.25 | 5.37E-05 | 0.439 | 0.380 | 0.79 | 0.71 | -0.87 | 0.94 | 1.20E-01 | CSMD1                                            | intronic       |
| 6  | 114398669 | A | G | rs7772117                         | 6.41E-02 | 0.294 | 0.315 | 0.91 | 0.81 | -1.02 | 5.37E-05 | 0.336 | 0.294 | 1.21 | 1.09 | -1.36 | 1.07 | 1.20E-01 | LOC101927768                                     | ncRNA_intronic |
| 18 | 5332365   | G | C | rs550740                          | 1.20E-01 | 0.289 | 0.298 | 0.96 | 0.85 | -1.08 | 5.81E-05 | 0.286 | 0.323 | 0.84 | 0.75 | -0.94 | 0.90 | 1.20E-01 | ZBTB14(dist=35313), EPB41L3(dist=60015)          | intergenic     |
| 10 | 101665298 | A | G | rs7080771                         | 6.23E-05 | 0.441 | 0.495 | 0.81 | 0.72 | -0.9  | 1.97E-01 | 0.492 | 0.476 | 1.07 | 0.96 | -1.18 | 0.94 | 1.21E-01 | DNMBP                                            | intronic       |
| 8  | 60034920  | A | T | rs74373412                        | 8.30E-06 | 0.031 | 0.048 | 0.65 | 0.48 | -0.87 | 7.37E-02 | 0.055 | 0.051 | 1.07 | 0.85 | -1.34 | 0.86 | 1.21E-01 | TOX(dist=3153), CA8(dist=1066503)                | intergenic     |
| 19 | 50280376  | C | T | rs11671380                        | 5.13E-02 | 0.035 | 0.041 | 0.83 | 0.62 | -1.11 | 5.91E-05 | 0.051 | 0.037 | 1.38 | 1.08 | -1.77 | 1.24 | 1.24E-01 | AP2A1                                            | intronic       |
| 3  | 30570181  | G | A | rs75839712                        | 2.14E-01 | 0.028 | 0.034 | 0.83 | 0.6  | -1.14 | 3.74E-05 | 0.033 | 0.020 | 1.65 | 1.21 | -2.26 | 1.26 | 1.24E-01 | RBMS3(dist=518295), TGFBR2(dist=77813)           | intergenic     |
| 8  | 5997132   | G | A | rs2552217                         | 1.56E-01 | 0.080 | 0.092 | 0.85 | 0.7  | -1.04 | 4.03E-05 | 0.098 | 0.070 | 1.46 | 1.22 | -1.75 | 1.13 | 1.25E-01 | CSMD1(dist=1144804), LOC100287015(dist=263945)   | intergenic     |
| 10 | 101671095 | T | C | rs10883420                        | 5.89E-05 | 0.432 | 0.485 | 0.81 | 0.72 | -0.9  | 1.82E-01 | 0.481 | 0.465 | 1.07 | 0.96 | -1.18 | 0.94 | 1.26E-01 | DNMBP                                            | intronic       |
| 8  | 6003427   | T | C | rs2552226                         | 1.09E-01 | 0.079 | 0.094 | 0.83 | 0.68 | -1.01 | 2.30E-05 | 0.101 | 0.070 | 1.49 | 1.24 | -1.78 | 1.13 | 1.28E-01 | CSMD1(dist=1151099), LOC100287015(dist=257650)   | intergenic     |
| 10 | 42514325  | A | C | rs386743104;rs2204160             | 6.03E-05 | 0.135 | 0.091 | 1.57 | 1.32 | -1.86 | 2.19E-01 | 0.125 | 0.142 | 0.87 | 0.74 | -1.01 | 1.11 | 1.29E-01 | NONE(dist=NONE), LOC441666(dist=312989)          | intergenic     |
| 20 | 61698888  | C | T | rs139907250                       | 1.28E-01 | 0.038 | 0.033 | 1.17 | 0.87 | -1.57 | 3.68E-05 | 0.034 | 0.023 | 1.51 | 1.11 | -2.03 | 1.38 | 1.37E-01 | LOC63930                                         | ncRNA_intronic |
| 2  | 60416214  | T | A | rs12466652                        | 7.00E-02 | 0.170 | 0.172 | 0.99 | 0.85 | -1.14 | 5.64E-05 | 0.207 | 0.184 | 1.16 | 1.02 | -1.32 | 1.09 | 1.38E-01 | LOC101927285(dist=909679), MIR4432(dist=198283)  | intergenic     |
| 16 | 14027205  | C | T | rs3136134                         | 4.76E-05 | 0.075 | 0.110 | 0.65 | 0.54 | -0.79 | 6.14E-02 | 0.101 | 0.081 | 1.26 | 1.06 | -1.51 | 0.90 | 1.39E-01 | ERCC4                                            | intronic       |
| 10 | 24665624  | G | T | rs112253843                       | 5.10E-05 | 0.068 | 0.037 | 1.91 | 1.49 | -2.46 | 2.78E-01 | 0.093 | 0.108 | 0.86 | 0.72 | -1.02 | 1.14 | 1.40E-01 | KIAA1217                                         | intronic       |
| 8  | 60147276  | G | C | rs2552265                         | 1.02E-01 | 0.271 | 0.297 | 0.88 | 0.78 | -1    | 5.60E-05 | 0.298 | 0.248 | 1.29 | 1.15 | -1.44 | 1.07 | 1.42E-01 | CSMD1(dist=1162398), LOC100287015(dist=246351)   | intergenic     |
| 1  | 104474307 | C | T | rs12567044                        | 3.64E-02 | 0.243 | 0.264 | 0.90 | 0    |       |          |       |       |      |      |       |      |          |                                                  |                |

|    |           |   |   |                         |          |       |       |      |      |       |          |       |       |      |      |       |      |          |                                                |                |
|----|-----------|---|---|-------------------------|----------|-------|-------|------|------|-------|----------|-------|-------|------|------|-------|------|----------|------------------------------------------------|----------------|
| 16 | 14027638  | G | A | rs3136137               | 5.69E-05 | 0.075 | 0.110 | 0.66 | 0.54 | -0.8  | 5.80E-02 | 0.099 | 0.079 | 1.27 | 1.06 | -1.52 | 0.90 | 1.50E-01 | ERCC4                                          | intronic       |
| 16 | 14027738  | C | G | rs3136140               | 5.69E-05 | 0.075 | 0.110 | 0.66 | 0.54 | -0.8  | 5.78E-02 | 0.099 | 0.079 | 1.27 | 1.06 | -1.52 | 0.90 | 1.50E-01 | ERCC4                                          | intronic       |
| 12 | 44290804  | A | G | rs71696511              | 1.47E-01 | 0.041 | 0.050 | 0.80 | 0.62 | -1.05 | 5.77E-05 | 0.048 | 0.029 | 1.69 | 1.31 | -2.19 | 1.17 | 1.50E-01 | TMEM117                                        | intronic       |
| 10 | 50519197  | T | C | rs11101084              | 5.30E-05 | 0.146 | 0.096 | 1.61 | 1.36 | -1.91 | 1.40E-01 | 0.126 | 0.148 | 0.83 | 0.71 | -0.97 | 1.10 | 1.51E-01 | C10orf71                                       | intronic       |
| 16 | 14026555  | G | T | rs3136126               | 5.59E-05 | 0.075 | 0.110 | 0.65 | 0.54 | -0.8  | 5.85E-02 | 0.099 | 0.080 | 1.27 | 1.06 | -1.52 | 0.90 | 1.53E-01 | ERCC4                                          | intronic       |
| 16 | 14026379  | C | G | rs3136123               | 5.67E-05 | 0.075 | 0.110 | 0.65 | 0.54 | -0.8  | 5.89E-02 | 0.100 | 0.080 | 1.27 | 1.06 | -1.52 | 0.91 | 1.54E-01 | ERCC4                                          | intronic       |
| 1  | 104464676 | C | G | rs7524994               | 1.27E-02 | 0.246 | 0.273 | 0.87 | 0.77 | -0.98 | 8.69E-06 | 0.314 | 0.266 | 1.26 | 1.13 | -1.41 | 1.07 | 1.54E-01 | AMY1A(dist=163365), LOC100129138(dist=150969)  | intergenic     |
| 16 | 14025892  | C | A | rs3136120               | 5.66E-05 | 0.075 | 0.110 | 0.65 | 0.54 | -0.8  | 5.91E-02 | 0.100 | 0.080 | 1.27 | 1.06 | -1.52 | 0.91 | 1.55E-01 | ERCC4                                          | intronic       |
| 16 | 14021402  | G | A | rs191367455             | 5.48E-05 | 0.075 | 0.110 | 0.65 | 0.54 | -0.79 | 6.06E-02 | 0.100 | 0.081 | 1.27 | 1.06 | -1.52 | 0.91 | 1.56E-01 | ERCC4                                          | intronic       |
| 16 | 14021492  | A | G | rs3136094               | 5.48E-05 | 0.075 | 0.110 | 0.65 | 0.54 | -0.79 | 6.06E-02 | 0.100 | 0.081 | 1.27 | 1.06 | -1.52 | 0.91 | 1.56E-01 | ERCC4                                          | intronic       |
| 16 | 14021149  | C | T | rs113463405             | 5.50E-05 | 0.075 | 0.110 | 0.65 | 0.54 | -0.79 | 6.07E-02 | 0.100 | 0.081 | 1.27 | 1.06 | -1.52 | 0.91 | 1.56E-01 | ERCC4                                          | intronic       |
| 16 | 14020382  | C | G | rs3136091               | 5.59E-05 | 0.075 | 0.110 | 0.65 | 0.54 | -0.8  | 6.13E-02 | 0.100 | 0.081 | 1.27 | 1.06 | -1.52 | 0.91 | 1.57E-01 | ERCC4                                          | intronic       |
| 16 | 14023702  | T | G | rs3136108               | 5.55E-05 | 0.075 | 0.110 | 0.65 | 0.54 | -0.79 | 5.96E-02 | 0.100 | 0.080 | 1.27 | 1.06 | -1.52 | 0.91 | 1.57E-01 | ERCC4                                          | intronic       |
| 16 | 14023652  | C | T | rs3136107               | 5.55E-05 | 0.075 | 0.110 | 0.65 | 0.54 | -0.79 | 5.97E-02 | 0.100 | 0.081 | 1.27 | 1.06 | -1.52 | 0.91 | 1.57E-01 | ERCC4                                          | intronic       |
| 16 | 14022944  | G | A | rs3136098               | 5.53E-05 | 0.075 | 0.110 | 0.65 | 0.54 | -0.79 | 5.99E-02 | 0.100 | 0.081 | 1.27 | 1.06 | -1.52 | 0.91 | 1.57E-01 | ERCC4                                          | intronic       |
| 19 | 7270149   | C | T | rs34380919              | 1.52E-01 | 0.074 | 0.064 | 1.16 | 0.94 | -1.44 | 3.87E-05 | 0.070 | 0.059 | 1.19 | 0.97 | -1.47 | 1.19 | 1.58E-01 | INSR                                           | intronic       |
| 10 | 101656449 | A | G | rs7090333               | 4.43E-05 | 0.438 | 0.493 | 0.80 | 0.72 | -0.9  | 1.26E-01 | 0.491 | 0.472 | 1.08 | 0.97 | -1.2  | 0.94 | 1.58E-01 | DNMBP                                          | intronic       |
| 16 | 14026764  | G | A | rs3136129               | 4.70E-05 | 0.070 | 0.104 | 0.65 | 0.53 | -0.79 | 4.01E-02 | 0.091 | 0.072 | 1.29 | 1.07 | -1.55 | 0.90 | 1.60E-01 | ERCC4                                          | intronic       |
| 16 | 14025566  | C | T | rs3136116               | 6.19E-05 | 0.075 | 0.110 | 0.66 | 0.54 | -0.8  | 5.85E-02 | 0.100 | 0.080 | 1.27 | 1.06 | -1.52 | 0.91 | 1.61E-01 | ERCC4                                          | intronic       |
| 8  | 5996685   | G | A | rs2570702               | 6.87E-02 | 0.093 | 0.111 | 0.83 | 0.69 | -0.99 | 9.46E-06 | 0.116 | 0.083 | 1.46 | 1.23 | -1.73 | 1.11 | 1.63E-01 | CSMD1(dist=1144357), LOC100287015(dist=264392) | intergenic     |
| 20 | 61692474  | A | G | rs151267029             | 1.54E-01 | 0.038 | 0.034 | 1.15 | 0.86 | -1.54 | 7.20E-06 | 0.041 | 0.027 | 1.51 | 1.15 | -2    | 1.35 | 1.63E-01 | LOC63930                                       | ncRNA_intronic |
| 1  | 104473089 | T | C | rs11185336              | 1.02E-02 | 0.273 | 0.302 | 0.86 | 0.77 | -0.98 | 9.33E-06 | 0.345 | 0.294 | 1.27 | 1.13 | -1.41 | 1.06 | 1.64E-01 | AMY1A(dist=171778), LOC100129138(dist=142556)  | intergenic     |
| 10 | 42638556  | T | G | rs7919062;rs66502870    | 3.15E-05 | 0.163 | 0.117 | 0.68 | 0.58 | -0.8  | 1.36E-01 | 0.156 | 0.175 | 1.15 | 0.99 | -1.32 | 0.91 | 1.68E-01 | NONE(dist=NONE), LOC441666(dist=188758)        | intergenic     |
| 1  | 104473412 | C | T | rs10881523              | 1.10E-02 | 0.274 | 0.304 | 0.86 | 0.77 | -0.98 | 8.97E-06 | 0.344 | 0.293 | 1.27 | 1.13 | -1.41 | 1.06 | 1.69E-01 | AMY1A(dist=172101), LOC100129138(dist=142233)  | intergenic     |
| 8  | 5991436   | G | A | rs2552211               | 7.49E-02 | 0.126 | 0.149 | 0.82 | 0.7  | -0.97 | 5.63E-05 | 0.144 | 0.106 | 1.42 | 1.22 | -1.66 | 1.09 | 1.73E-01 | CSMD1(dist=1139108), LOC100287015(dist=269641) | intergenic     |
| 14 | 69565193  | T | G | rs11628126              | 3.32E-05 | 0.402 | 0.468 | 1.31 | 1.17 | -1.46 | 2.89E-02 | 0.453 | 0.423 | 0.89 | 0.8  | -0.98 | 1.06 | 1.80E-01 | DCAF5                                          | intronic       |
| 8  | 60043089  | T | G | rs77717207              | 5.39E-05 | 0.032 | 0.045 | 0.70 | 0.52 | -0.94 | 8.09E-02 | 0.056 | 0.053 | 1.05 | 0.83 | -1.31 | 0.87 | 1.88E-01 | TOX(dist=11322), CA8(dist=1058334)             | intergenic     |
| 16 | 14021276  | C | T | rs113015597             | 6.03E-05 | 0.076 | 0.111 | 0.66 | 0.54 | -0.8  | 4.49E-02 | 0.103 | 0.083 | 1.27 | 1.07 | -1.52 | 0.91 | 1.88E-01 | ERCC4                                          | intronic       |
| 10 | 42478914  | T | C | rs9794164               | 4.18E-05 | 0.147 | 0.100 | 1.56 | 1.32 | -1.84 | 1.07E-01 | 0.131 | 0.152 | 0.84 | 0.73 | -0.98 | 1.09 | 1.90E-01 | NONE(dist=NONE), LOC441666(dist=348400)        | intergenic     |
| 6  | 47821531  | A | G | rs73475571              | 7.40E-02 | 0.033 | 0.026 | 1.28 | 0.93 | -1.77 | 6.36E-05 | 0.014 | 0.028 | 0.50 | 0.33 | -0.76 | 0.84 | 1.92E-01 | OPN5(dist=27415), PTHCHD4(dist=24233)          | intergenic     |
| 8  | 5990456   | A | G | rs2700824               | 5.34E-02 | 0.115 | 0.139 | 0.81 | 0.68 | -0.95 | 6.02E-05 | 0.139 | 0.101 | 1.44 | 1.23 | -1.68 | 1.09 | 1.93E-01 | CSMD1(dist=1138128), LOC100287015(dist=270621) | intergenic     |
| 12 | 44290544  | C | T | rs114079287;rs386762605 | 1.00E-01 | 0.038 | 0.048 | 0.77 | 0.59 | -1.02 | 5.79E-05 | 0.048 | 0.029 | 1.69 | 1.31 | -2.19 | 1.15 | 1.96E-01 | TMEM117                                        | intronic       |
| 10 | 42607692  | T | C | rs10899776;rs386743106  | 6.01E-05 | 0.177 | 0.132 | 0.71 | 0.61 | -0.82 | 1.45E-01 | 0.168 | 0.186 | 1.13 | 0.99 | -1.13 | 0.92 | 1.97E-01 | NONE(dist=NONE), LOC441666(dist=219622)        | intergenic     |
| 8  | 60021908  | C | T | rs16924609              | 1.60E-05 | 0.032 | 0.045 | 0.70 | 0.52 | -0.93 | 3.39E-02 | 0.052 | 0.047 | 1.10 | 0.87 | -1.4  | 0.86 | 2.00E-01 | TOX                                            | intronic       |
| 4  | 185023159 | T | A | rs4482809               | 1.90E-05 | 0.203 | 0.256 | 0.74 | 0.65 | -0.84 | 1.34E-02 | 0.256 | 0.226 | 1.18 | 1.05 | -1.33 | 0.94 | 2.03E-01 | ENPP6                                          | intronic       |
| 10 | 101654696 | T | C | rs3758394               | 3.98E-05 | 0.447 | 0.494 | 0.83 | 0.74 | -0.92 | 7.71E-02 | 0.508 | 0.488 | 1.08 | 0.97 | -1.12 | 0.95 | 2.13E-01 | DNMBP                                          | intronic       |
| 13 | 78943559  | G | A | rs78562126              | 2.15E-01 | 0.018 | 0.023 | 0.79 | 0.54 | -1.18 | 2.92E-05 | 0.033 | 0.022 | 1.48 | 1.09 | -2.01 | 0.77 | 2.24E-01 | RNF219-AS1                                     | ncRNA_intronic |
| 16 | 16246164  | T | G | rs11075299              | 6.26E-05 | 0.117 | 0.080 | 1.53 | 1.27 | -1.84 | 6.50E-02 | 0.088 | 0.108 | 0.79 | 0.66 | -0.95 | 1.09 | 2.26E-01 | ABCC6                                          | intronic       |
| 1  | 242330417 | T | A | rs199764889;rs12564355  | 1.92E-05 | 0.208 | 0.172 | 1.26 | 1.1  | -1.45 | 1.01E-02 | 0.155 | 0.173 | 0.88 | 0.76 | -1.01 | 1.07 | 2.27E-01 | PLD5                                           | intronic       |
| 13 | 78943318  | G | A | rs75119373              | 2.18E-01 | 0.018 | 0.023 | 0.80 | 0.54 | -1.18 | 2.38E-05 | 0.032 | 0.021 | 1.50 | 1.1  | -2.05 | 0.77 | 2.27E-01 | RNF219-AS1                                     | ncRNA_intronic |
| 13 | 78943028  | C | T | rs117152880             | 2.18E-01 | 0.018 | 0.023 | 0.80 | 0.54 | -1.18 | 2.38E-05 | 0.032 | 0.021 | 1.50 | 1.1  | -2.05 | 0.77 | 2.27E-01 | RNF219-AS1                                     | ncRNA_intronic |
| 13 | 78942393  | G | A | rs77452499              | 2.19E-01 | 0.018 | 0.023 | 0.80 | 0.54 | -1.18 | 2.38E-05 | 0.032 | 0.021 | 1.50 | 1.1  | -2.05 | 0.77 | 2.28E-01 | RNF219-AS1                                     | ncRNA_intronic |
| 11 | 61060654  | G | A | rs111341988             | 2.28E-01 | 0.025 | 0.026 | 0.96 | 0.68 | -1.36 | 2.66E-05 | 0.045 | 0.036 | 1.27 | 0.98 | -1.64 | 0.76 | 2.34E-01 | VWCE                                           | intronic       |
| 6  | 114410561 | T | A | rs35680201              | 1.58E-02 | 0.257 | 0.288 | 0.86 | 0.76 | -0.97 | 4.40E-05 | 0.305 | 0.258 | 1.26 | 1.13 | -1.42 | 1.06 | 2.36E-01 | LOC101927768                                   | ncRNA_intronic |
| 16 | 83965086  | G | T | rs144213123             | 2.25E-01 | 0.033 | 0.029 | 1.15 | 0.83 | -1.57 | 4.78E-06 | 0.034 | 0.021 | 1.65 | 1.22 | -2.24 | 1.26 | 2.43E-01 | MLYCD(dist=15299), OSGIN1(dist=21741)          | intergenic     |
| 13 | 78935905  | A | C | rs80255344              | 2.39E-01 | 0.021 | 0.026 | 0.81 | 0.56 | -1.17 | 1.27E-05 | 0.034 | 0.023 | 1.49 | 1.1  | -2.02 | 0.79 | 2.48E-01 | RNF219-AS1                                     | ncRNA_intronic |
| 13 | 78822358  | A | G | rs76763033              | 2.40E-01 | 0.018 | 0.023 | 0.78 | 0.53 | -1.15 | 5.97E-06 | 0.034 | 0.023 | 1.52 | 1.12 | -2.05 | 0.78 | 2.49E-01 | RNF219-AS1                                     | ncRNA_intronic |
| 10 | 49458749  | G | A | rs1652244               | 5.78E-05 | 0.121 | 0.078 | 0.61 | 0.51 | -0.73 | 4.71E-02 | 0.101 | 0.122 | 1.23 | 1.04 | -1.46 | 0.91 | 2.49E-01 | FRMPD2                                         | intronic       |
| 4  | 185022370 | G | A | rs4285130               | 4.60E-05 | 0.191 | 0.241 | 0.74 | 0.65 | -0.85 | 1.46E-02 | 0.240 | 0.212 | 1.18 | 1.04 | -1.33 | 0.95 | 2.50E-01 | ENPP6                                          | intronic       |
| 13 | 112324131 | G | T | rs11842981;rs35218042   | 2.42E-01 | 0.142 | 0.139 | 1.02 | 0.87 | -1.19 | 6.02E-05 | 0.152 | 0.122 | 1.30 | 1.12 | -1.51 | 1.11 | 2.51E-01 | TEX29(dist=327537), LINC00354(dist=223561)     | intergenic     |
| 9  | 3852115   | C | A | rs7868369               | 3.48E-05 | 0.422 | 0.492 | 1.33 | 1.19 | -1.48 | 1.09E-02 | 0.476 | 0.433 | 0.84 | 0.76 | -0.93 | 1.05 | 2.65E-01 | GLIS3                                          | intronic       |
| 13 | 78832827  | C | T | rs77583205              | 2.59E-01 | 0.019 | 0.024 | 0.79 | 0.54 | -1.16 | 8.28E-06 | 0.034 | 0.023 | 1.51 | 1.12 | -2.05 | 0.80 | 2.68E-01 | RNF219-AS1                                     | ncRNA_intronic |
| 13 | 78833053  | T | C | rs115696291             | 2.62E-01 | 0.019 | 0.024 | 0.79 | 0.54 | -1.16 | 8.41E-06 | 0.034 | 0.023 | 1.51 | 1.12 | -2.05 | 0.80 | 2.71E-01 | RNF219-AS1                                     | ncRNA_intronic |
| 5  | 88991920  | A | G | rs4916670               | 2.65E-02 | 0.426 | 0.403 | 0.91 | 0.81 | -1.01 | 2.55E-05 | 0.355 | 0.397 | 1.20 | 1.08 | -1.34 | 1.05 | 2.71E-01 | MEF2C-AS1(dist=663727), MIR3660(dist=320518)   | intergenic     |
| 10 | 42470330  | C | T | rs11265985              | 1.92E-05 | 0.141 | 0.093 | 1.59 | 1.34 | -1.89 | 4.11E-02 | 0.117 | 0.140 | 0.81 | 0.69 | -0.95 | 1.08 | 2.74E-01 | NONE(dist=NONE), LOC441666(dist=356984)        | intergenic     |
| 4  | 185019825 | C | G | rs12512435              | 4.51E-05 | 0.196 | 0.247 | 0.75 | 0.65 | -0.85 | 1.06E-02 | 0.246 | 0.216 | 1.18 | 1.05 | -1.34 | 0.95 | 2.81E-01 | ENPP6                                          | intronic       |
| 6  | 166915505 | G | A | rs115816393             | 2.71E-01 | 0.041 | 0.050 | 0.81 | 0.62 | -1.06 | 6.06E-06 | 0.059 | 0.040 | 1.50 | 1.19 | -1.89 | 0.85 | 2.84E-01 | RPS6KA2                                        | intronic       |
| 6  | 166915041 | C | T | rs16899021              | 2.71E-01 | 0.041 | 0.050 | 0.81 | 0.62 | -1.06 | 5.86E-06 | 0.059 | 0.040 | 1.50 | 1.19 | -1.89 | 0.85 | 2.84E-01 | RPS6                                           |                |

|    |           |   |   |                       |          |       |       |      |      |       |          |       |       |      |      |       |      |          |                                                     |                |
|----|-----------|---|---|-----------------------|----------|-------|-------|------|------|-------|----------|-------|-------|------|------|-------|------|----------|-----------------------------------------------------|----------------|
| 13 | 78937309  | G | T | rs76213407            | 2.84E-01 | 0.020 | 0.024 | 0.82 | 0.56 | -1.2  | 2.83E-05 | 0.032 | 0.022 | 1.49 | 1.09 | -2.04 | 0.80 | 2.93E-01 | RNF219-AS1                                          | ncRNA_intronic |
| 13 | 78936893  | A | G | rs116899733           | 2.84E-01 | 0.020 | 0.024 | 0.82 | 0.56 | -1.2  | 2.83E-05 | 0.032 | 0.022 | 1.49 | 1.09 | -2.04 | 0.80 | 2.93E-01 | RNF219-AS1                                          | ncRNA_intronic |
| 13 | 78926490  | T | C | rs75214321            | 2.84E-01 | 0.020 | 0.024 | 0.82 | 0.56 | -1.2  | 2.86E-05 | 0.032 | 0.022 | 1.49 | 1.09 | -2.04 | 0.80 | 2.93E-01 | RNF219-AS1                                          | ncRNA_intronic |
| 13 | 78925903  | C | T | rs78058983            | 2.85E-01 | 0.020 | 0.024 | 0.82 | 0.56 | -1.2  | 2.87E-05 | 0.032 | 0.022 | 1.49 | 1.09 | -2.04 | 0.80 | 2.94E-01 | RNF219-AS1                                          | ncRNA_intronic |
| 10 | 42431115  | T | C | rs12219843            | 4.12E-05 | 0.143 | 0.097 | 1.56 | 1.32 | -1.84 | 7.30E-02 | 0.128 | 0.150 | 0.83 | 0.71 | -0.97 | 1.07 | 2.95E-01 | NONE(dist=NONE), LOC441666(dist=396199)             | intergenic     |
| 10 | 42484520  | G | C | rs2878325             | 4.31E-05 | 0.140 | 0.093 | 1.58 | 1.33 | -1.87 | 4.95E-02 | 0.118 | 0.140 | 0.82 | 0.7  | -0.96 | 1.07 | 2.97E-01 | NONE(dist=NONE), LOC441666(dist=342794)             | intergenic     |
| 10 | 42479888  | G | A | rs11265998            | 2.43E-05 | 0.142 | 0.094 | 1.59 | 1.34 | -1.88 | 4.00E-02 | 0.119 | 0.143 | 0.81 | 0.69 | -0.95 | 1.07 | 2.99E-01 | NONE(dist=NONE), LOC441666(dist=347426)             | intergenic     |
| 10 | 42482202  | G | A | rs11528798            | 4.46E-05 | 0.140 | 0.093 | 1.58 | 1.33 | -1.87 | 4.94E-02 | 0.117 | 0.140 | 0.82 | 0.7  | -0.96 | 1.07 | 3.00E-01 | NONE(dist=NONE), LOC441666(dist=345112)             | intergenic     |
| 7  | 99203037  | T | G | rs147230959           | 3.00E-01 | 0.030 | 0.034 | 0.89 | 0.65 | -1.22 | 1.21E-05 | 0.040 | 0.026 | 1.56 | 1.18 | -2.07 | 0.81 | 3.02E-01 | GS1-259H13.2                                        | intronic       |
| 10 | 42451897  | C | T | rs1603828             | 2.06E-05 | 0.143 | 0.095 | 1.59 | 1.34 | -1.88 | 3.78E-02 | 0.117 | 0.141 | 0.81 | 0.69 | -0.95 | 1.07 | 3.06E-01 | NONE(dist=NONE), LOC441666(dist=375417)             | intergenic     |
| 13 | 78878767  | G | A | rs74566709            | 2.97E-01 | 0.022 | 0.027 | 0.83 | 0.58 | -1.19 | 6.80E-06 | 0.034 | 0.023 | 1.52 | 1.12 | -2.05 | 0.82 | 3.06E-01 | RNF219-AS1                                          | ncRNA_intronic |
| 13 | 78878024  | T | A | rs79617112            | 2.99E-01 | 0.022 | 0.027 | 0.83 | 0.58 | -1.19 | 6.99E-06 | 0.034 | 0.023 | 1.52 | 1.12 | -2.05 | 0.82 | 3.08E-01 | RNF219-AS1                                          | ncRNA_intronic |
| 16 | 16268868  | G | A | rs12931553            | 6.28E-05 | 0.110 | 0.072 | 1.59 | 1.32 | -1.93 | 4.89E-02 | 0.096 | 0.122 | 0.77 | 0.65 | -0.92 | 1.07 | 3.09E-01 | ABCC6                                               | intronic       |
| 13 | 78846263  | G | A | rs79854491            | 3.01E-01 | 0.020 | 0.025 | 0.81 | 0.56 | -1.18 | 1.14E-05 | 0.034 | 0.023 | 1.51 | 1.11 | -2.04 | 0.82 | 3.10E-01 | RNF219-AS1                                          | ncRNA_intronic |
| 13 | 78835361  | T | C | rs80187665            | 3.01E-01 | 0.020 | 0.025 | 0.81 | 0.56 | -1.18 | 1.03E-05 | 0.034 | 0.023 | 1.51 | 1.12 | -2.04 | 0.82 | 3.10E-01 | RNF219-AS1                                          | ncRNA_intronic |
| 13 | 78837277  | T | A | rs78474623            | 3.01E-01 | 0.020 | 0.025 | 0.81 | 0.56 | -1.18 | 1.04E-05 | 0.034 | 0.023 | 1.51 | 1.12 | -2.04 | 0.82 | 3.10E-01 | RNF219-AS1                                          | ncRNA_intronic |
| 7  | 95636259  | C | T | rs319316              | 4.97E-02 | 0.028 | 0.038 | 0.74 | 0.54 | -1.01 | 4.68E-05 | 0.041 | 0.025 | 1.67 | 1.26 | -2.22 | 1.14 | 3.11E-01 | DYNC111                                             | intronic       |
| 13 | 78873846  | G | T | rs77618544            | 3.14E-01 | 0.022 | 0.026 | 0.83 | 0.57 | -1.19 | 8.53E-06 | 0.034 | 0.023 | 1.51 | 1.12 | -2.05 | 0.82 | 3.23E-01 | RNF219-AS1                                          | ncRNA_intronic |
| 13 | 78873440  | G | A | rs76711188            | 3.14E-01 | 0.022 | 0.026 | 0.83 | 0.57 | -1.19 | 8.54E-06 | 0.034 | 0.023 | 1.51 | 1.12 | -2.05 | 0.82 | 3.24E-01 | RNF219-AS1                                          | ncRNA_intronic |
| 13 | 78872166  | T | C | rs76054032            | 3.15E-01 | 0.022 | 0.026 | 0.83 | 0.57 | -1.19 | 8.76E-06 | 0.034 | 0.023 | 1.51 | 1.12 | -2.05 | 0.82 | 3.24E-01 | RNF219-AS1                                          | ncRNA_intronic |
| 13 | 78856257  | A | C | rs76219190            | 3.17E-01 | 0.021 | 0.026 | 0.82 | 0.57 | -1.19 | 1.06E-05 | 0.034 | 0.023 | 1.51 | 1.12 | -2.04 | 0.82 | 3.26E-01 | RNF219-AS1                                          | ncRNA_intronic |
| 13 | 78861066  | T | C | rs78222135            | 3.19E-01 | 0.021 | 0.026 | 0.82 | 0.57 | -1.19 | 1.02E-05 | 0.034 | 0.023 | 1.51 | 1.12 | -2.04 | 0.82 | 3.28E-01 | RNF219-AS1                                          | ncRNA_intronic |
| 17 | 78256045  | G | A | rs10871506;rs71354808 | 3.32E-01 | 0.315 | 0.320 | 0.98 | 0.87 | -1.11 | 1.02E-06 | 0.383 | 0.346 | 1.17 | 1.05 | -1.31 | 0.94 | 3.29E-01 | RNF213                                              | intronic       |
| 10 | 42430265  | A | C | rs11266164            | 3.02E-05 | 0.136 | 0.091 | 1.57 | 1.32 | -1.86 | 6.62E-02 | 0.120 | 0.142 | 0.82 | 0.7  | -0.96 | 1.07 | 3.32E-01 | NONE(dist=NONE), LOC441666(dist=397049)             | intergenic     |
| 16 | 83963096  | C | T | rs138126554           | 3.21E-01 | 0.033 | 0.030 | 1.10 | 0.8  | -1.51 | 3.76E-06 | 0.035 | 0.021 | 1.65 | 1.22 | -2.24 | 1.21 | 3.40E-01 | MLYCD(dist=13309), OSGIN1(dist=23731)               | intergenic     |
| 4  | 171983768 | C | T | rs13110811            | 6.21E-05 | 0.060 | 0.078 | 0.75 | 0.6  | -0.93 | 1.78E-02 | 0.088 | 0.083 | 1.07 | 0.89 | -1.29 | 0.93 | 3.40E-01 | LOC100506122(dist=3457), MIR6082(dist=123567)       | intergenic     |
| 16 | 83964828  | C | G | rs146022777           | 3.30E-01 | 0.032 | 0.029 | 1.10 | 0.8  | -1.52 | 3.77E-06 | 0.035 | 0.021 | 1.65 | 1.22 | -2.23 | 1.21 | 3.49E-01 | MLYCD(dist=15041), OSGIN1(dist=21999)               | intergenic     |
| 16 | 83965094  | G | T | rs148719447           | 3.51E-01 | 0.032 | 0.029 | 1.10 | 0.8  | -1.51 | 4.17E-06 | 0.035 | 0.022 | 1.64 | 1.21 | -2.21 | 1.20 | 3.69E-01 | MLYCD(dist=15307), OSGIN1(dist=21733)               | intergenic     |
| 6  | 44150486  | G | T | rs3734700             | 3.57E-01 | 0.050 | 0.048 | 0.95 | 0.74 | -1.22 | 1.67E-05 | 0.091 | 0.084 | 0.91 | 0.76 | -1.1  | 1.17 | 3.70E-01 | CAPN11                                              | intronic       |
| 6  | 32492887  | A | T | rs112747517           | 1.64E-05 | 0.067 | 0.086 | 0.76 | 0.62 | -0.94 | 3.58E-01 | 0.110 | 0.123 | 0.89 | 0.75 | -1.05 | 0.91 | 3.73E-01 | HLA-DRB5                                            | intronic       |
| 1  | 104480469 | G | T | rs12731458            | 3.42E-03 | 0.288 | 0.325 | 0.84 | 0.75 | -0.95 | 3.70E-05 | 0.347 | 0.299 | 1.25 | 1.12 | -1.39 | 1.04 | 3.78E-01 | AMY1A(dist=179158), LOC100129138(dist=135176)       | intergenic     |
| 9  | 117605524 | G | A | rs140546987           | 3.70E-01 | 0.036 | 0.034 | 1.06 | 0.79 | -1.42 | 2.30E-06 | 0.036 | 0.024 | 1.49 | 1.11 | -2.01 | 1.16 | 3.84E-01 | TNFSF15(dist=37116), TNFSF8(dist=50099)             | intergenic     |
| 17 | 19619053  | C | G | rs12450979            | 3.87E-01 | 0.031 | 0.024 | 1.30 | 0.93 | -1.81 | 1.12E-05 | 0.043 | 0.034 | 1.30 | 1    | -1.69 | 1.21 | 3.85E-01 | SLC47A2                                             | intronic       |
| 9  | 117585897 | G | C | rs56211063            | 3.78E-01 | 0.051 | 0.048 | 1.05 | 0.82 | -1.36 | 3.77E-05 | 0.058 | 0.041 | 1.43 | 1.13 | -1.8  | 1.13 | 3.92E-01 | TNFSF15(dist=17489), TNFSF8(dist=69726)             | intergenic     |
| 19 | 36485438  | C | A | rs77694703            | 1.05E-02 | 0.037 | 0.054 | 0.68 | 0.52 | -0.89 | 3.23E-05 | 0.056 | 0.037 | 1.55 | 1.22 | -1.96 | 1.10 | 3.94E-01 | SDHAF1                                              | upstream       |
| 7  | 120481    | G | A | rs114059049           | 4.06E-01 | 0.024 | 0.022 | 1.07 | 0.74 | -1.54 | 1.00E-05 | 0.031 | 0.020 | 1.54 | 1.12 | -2.11 | 1.23 | 4.08E-01 | NONE(dist=NONE), LOC100507642(dist=29237)           | intergenic     |
| 9  | 117574220 | G | A | rs55768522            | 4.18E-01 | 0.052 | 0.050 | 1.05 | 0.82 | -1.34 | 5.73E-05 | 0.059 | 0.042 | 1.43 | 1.13 | -1.8  | 1.12 | 4.31E-01 | TNFSF15(dist=5812), TNFSF8(dist=81403)              | intergenic     |
| 1  | 12108834  | T | C | rs28375907            | 4.51E-01 | 0.267 | 0.276 | 0.95 | 0.84 | -1.08 | 1.58E-05 | 0.242 | 0.275 | 0.84 | 0.74 | -0.95 | 0.94 | 4.60E-01 | MIIP(dist=16728), TNFRSF8(dist=14600)               | intergenic     |
| 19 | 36491745  | G | A | rs116703004           | 9.97E-03 | 0.037 | 0.054 | 0.68 | 0.51 | -0.89 | 6.03E-05 | 0.054 | 0.036 | 1.54 | 1.21 | -1.96 | 1.08 | 4.76E-01 | SDHAF1(dist=4525), SYNE4(dist=2257)                 | intergenic     |
| 7  | 120808    | C | T | rs138892364           | 4.82E-01 | 0.028 | 0.026 | 1.06 | 0.76 | -1.48 | 7.57E-06 | 0.032 | 0.021 | 1.53 | 1.12 | -2.09 | 1.15 | 4.84E-01 | NONE(dist=NONE), LOC100507642(dist=28910)           | intergenic     |
| 17 | 76314189  | A | G | rs4429354             | 5.15E-01 | 0.030 | 0.025 | 0.84 | 0.61 | -1.18 | 4.21E-05 | 0.056 | 0.047 | 0.84 | 0.67 | -1.06 | 0.87 | 5.12E-01 | LOC100996291(dist=39616), SOCS3(dist=38669)         | intergenic     |
| 9  | 140428047 | C | A | rs821309              | 5.04E-01 | 0.497 | 0.495 | 0.99 | 0.89 | -1.11 | 4.04E-05 | 0.455 | 0.481 | 0.90 | 0.81 | -1    | 1.04 | 5.17E-01 | PNPLA7                                              | intronic       |
| 16 | 81795129  | T | A | rs114848866           | 5.38E-01 | 0.041 | 0.040 | 1.00 | 0.76 | -1.33 | 5.52E-06 | 0.048 | 0.035 | 1.39 | 1.08 | -1.79 | 1.11 | 5.53E-01 | CMIP(dist=49762), PLCG2(dist=17734)                 | intergenic     |
| 1  | 60847989  | C | T | rs61801065            | 6.30E-01 | 0.037 | 0.036 | 1.04 | 0.78 | -1.39 | 1.25E-05 | 0.060 | 0.044 | 1.39 | 1.11 | -1.75 | 1.09 | 6.37E-01 | C1orf87(dist=308547), LOC101926964(dist=277314)     | intergenic     |
| 19 | 53850971  | T | C | rs4803095             | 6.53E-01 | 0.039 | 0.036 | 0.93 | 0.7  | -1.25 | 1.20E-05 | 0.067 | 0.059 | 0.88 | 0.71 | -1.08 | 1.09 | 6.57E-01 | ZNF845                                              | intronic       |
| 21 | 45515347  | T | G | rs9984123             | 6.50E-01 | 0.156 | 0.153 | 0.97 | 0.84 | -1.13 | 1.29E-05 | 0.172 | 0.152 | 0.86 | 0.75 | -0.99 | 1.04 | 6.58E-01 | TRAPPC10                                            | intronic       |
| 1  | 99728334  | G | A | rs79754822            | 6.59E-01 | 0.031 | 0.029 | 1.07 | 0.77 | -1.47 | 3.99E-06 | 0.068 | 0.056 | 1.23 | 0.99 | -1.52 | 0.91 | 6.65E-01 | LOC100129620(dist=113926), LPPR4(dist=1514)         | intergenic     |
| 6  | 10533751  | T | C | rs142960138           | 6.57E-01 | 0.044 | 0.043 | 1.02 | 0.78 | -1.34 | 5.79E-05 | 0.053 | 0.037 | 1.47 | 1.15 | -1.87 | 1.08 | 6.66E-01 | GCNT2                                               | intronic       |
| 18 | 5323289   | G | A | rs1940954             | 6.67E-01 | 0.220 | 0.199 | 1.14 | 0.99 | -1.3  | 2.76E-05 | 0.214 | 0.264 | 0.76 | 0.67 | -0.86 | 1.03 | 6.68E-01 | ZBTB14(dist=26237), EPB41L3(dist=69091)             | intergenic     |
| 2  | 8009840   | C | T | rs114622424           | 6.85E-01 | 0.036 | 0.041 | 0.87 | 0.66 | -1.16 | 2.24E-05 | 0.036 | 0.025 | 1.50 | 1.12 | -2.01 | 0.93 | 6.90E-01 | LOC100506274(dist=419459), LOC101929551(dist=17058) | intergenic     |
| 9  | 139510151 | T | C | rs914745              | 6.89E-01 | 0.487 | 0.480 | 1.03 | 0.92 | -1.15 | 6.30E-05 | 0.470 | 0.497 | 1.12 | 1.01 | -1.24 | 1.03 | 6.97E-01 | LINC01573(dist=65955), EGF7L7(dist=47228)           | intergenic     |
| 17 | 78408057  | C | T | rs41302844            | 6.99E-01 | 0.024 | 0.021 | 1.15 | 0.8  | -1.66 | 8.41E-06 | 0.061 | 0.048 | 1.29 | 1.03 | -1.61 | 1.08 | 6.97E-01 | ENDOV                                               | intronic       |
| 6  | 10531675  | C | T | rs78333635            | 6.96E-01 | 0.044 | 0.043 | 1.02 | 0.78 | -1.33 | 6.29E-05 | 0.053 | 0.037 | 1.46 | 1.15 | -1.87 | 1.07 | 7.04E-01 | GCNT2                                               | intronic       |
| 6  | 258786    | C | A | rs12208661            | 6.96E-01 | 0.128 | 0.134 | 0.95 | 0.81 | -1.11 | 5.34E-05 | 0.101 | 0.122 | 0.80 | 0.68 | -0.95 | 0.96 | 7.04E-01 | LOC285766(dist=53302), DUSP22(dist=33271)           | intergenic     |
| 17 | 78408213  | C | G | rs4494603             | 7.09E-01 | 0.024 | 0.021 | 1.15 | 0.8  | -1.66 | 8.63E-06 | 0.061 | 0.048 | 1.29 | 1.03 | -1.61 | 1.08 | 7.07E-01 | ENDOV                                               | intronic       |
| 9  | 139166504 | C | A | rs78078529            | 7.01E-01 | 0.042 | 0.043 | 0.99 | 0.75 | -1.3  | 5.90E-05 | 0.035 | 0.026 | 1.35 | 1    | -1.81 | 1.08 | 7.10E-01 | QSX2(dist=28817), DKFZP434A062(dist=50494)          | intergenic     |
| 6  | 32456318  | C | A | rs116644119           | 3.39E-05 | 0.071 | 0.089 | 0.78 | 0.63 | -0.95 | 7.07E-01 | 0.100 | 0.106 | 0.94 | 0.79 | -1.11 | 0.96 |          |                                                     |                |

|    |           |   |   |             |          |       |       |      |             |          |       |       |      |             |      |          |                                             |            |
|----|-----------|---|---|-------------|----------|-------|-------|------|-------------|----------|-------|-------|------|-------------|------|----------|---------------------------------------------|------------|
| 18 | 3186022   | C | T | rs145459859 | 5.59E-05 | 0.021 | 0.035 | 0.58 | 0.41 - 0.82 | 9.07E-01 | 0.033 | 0.031 | 1.05 | 0.79 - 1.41 | 0.98 | 9.08E-01 | MYOM1                                       | intronic   |
| 17 | 76295961  | G | A | rs4789581   | 9.52E-01 | 0.030 | 0.027 | 0.91 | 0.65 - 1.25 | 4.21E-05 | 0.055 | 0.047 | 0.85 | 0.67 - 1.07 | 0.99 | 9.51E-01 | LOC100996291(dist=21388), SOCS3(dist=56897) | intergenic |
| 4  | 146837176 | C | T | rs10027696  | 9.56E-01 | 0.096 | 0.097 | 0.99 | 0.82 - 1.19 | 3.64E-05 | 0.129 | 0.112 | 1.18 | 1.01 - 1.38 | 0.99 | 9.55E-01 | ZNF827                                      | intronic   |
| 6  | 41463776  | C | T | rs114054427 | 9.63E-01 | 0.038 | 0.039 | 0.96 | 0.72 - 1.28 | 4.90E-05 | 0.028 | 0.021 | 1.37 | 0.99 - 1.9  | 0.99 | 9.64E-01 | NCR2(dist=145151), LINC01276(dist=6406)     | intergenic |
| 17 | 76299354  | T | C | rs4374234   | 9.72E-01 | 0.038 | 0.035 | 0.93 | 0.69 - 1.24 | 1.78E-05 | 0.068 | 0.059 | 0.86 | 0.7 - 1.06  | 0.99 | 9.72E-01 | LOC100996291(dist=24781), SOCS3(dist=53504) | intergenic |
| 17 | 76294376  | T | C | rs9709190   | 9.90E-01 | 0.031 | 0.028 | 0.91 | 0.66 - 1.25 | 2.05E-05 | 0.057 | 0.048 | 0.84 | 0.67 - 1.06 | 1.00 | 9.89E-01 | LOC100996291(dist=19803), SOCS3(dist=58482) | intergenic |
| 3  | 65322224  | G | T | rs73123787  | 9.93E-01 | 0.036 | 0.030 | 1.19 | 0.88 - 1.62 | 3.65E-05 | 0.066 | 0.055 | 1.20 | 0.97 - 1.49 | 1.00 | 9.92E-01 | ADAMTS9-AS2(dist=325081), MAG11(dist=17682) | intergenic |

Results for all association with p-values < 6.5x10<sup>-5</sup> in GWAS1 and GWAS2 for IBD. Suggestive SNPs at established European loci (specifically <1 Mb of the maximal reported associations) for IBD are indicated in bold.

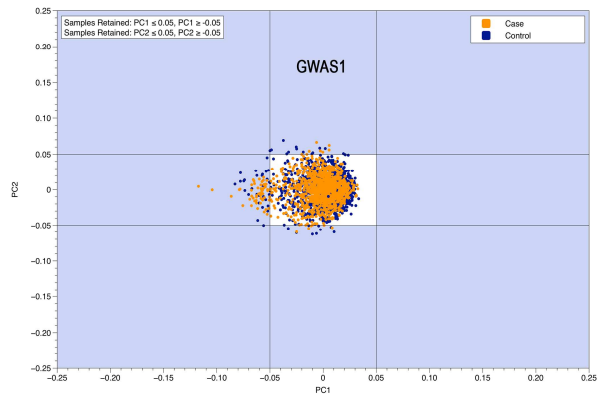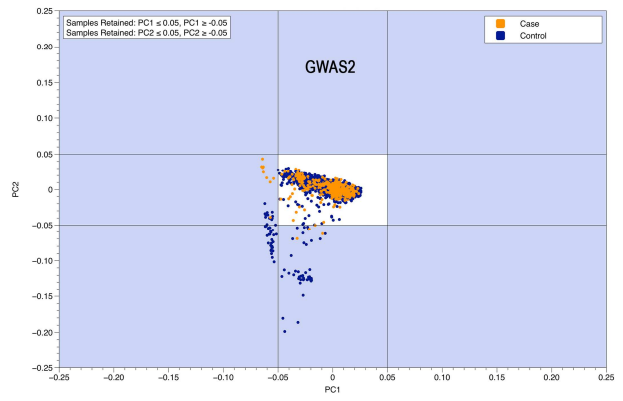

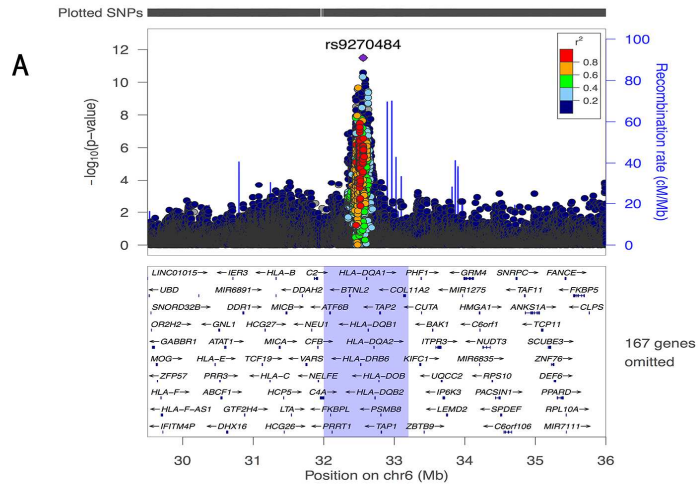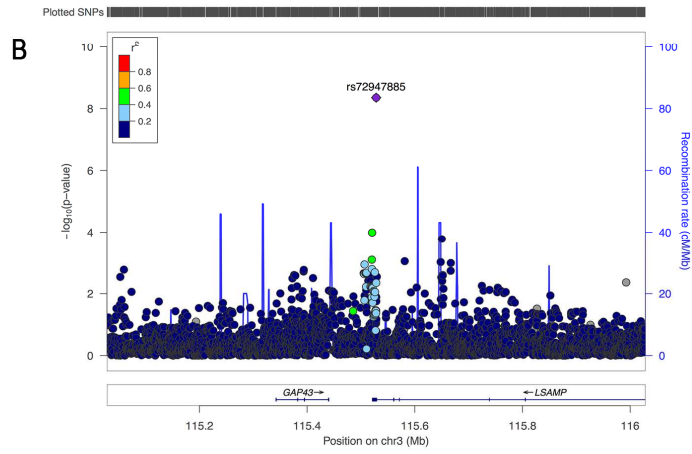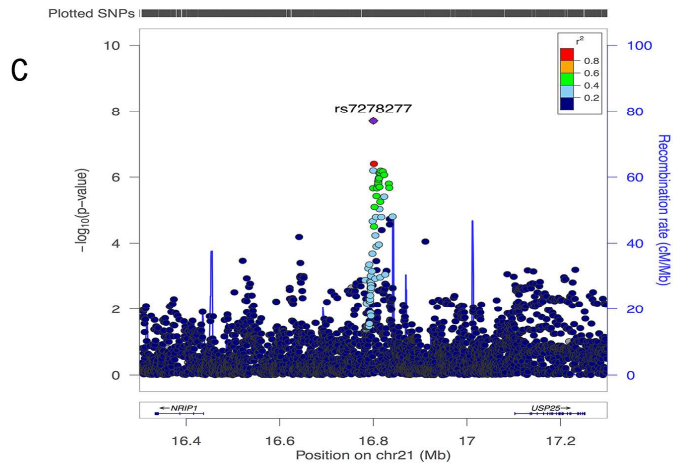



Plotted SNPs

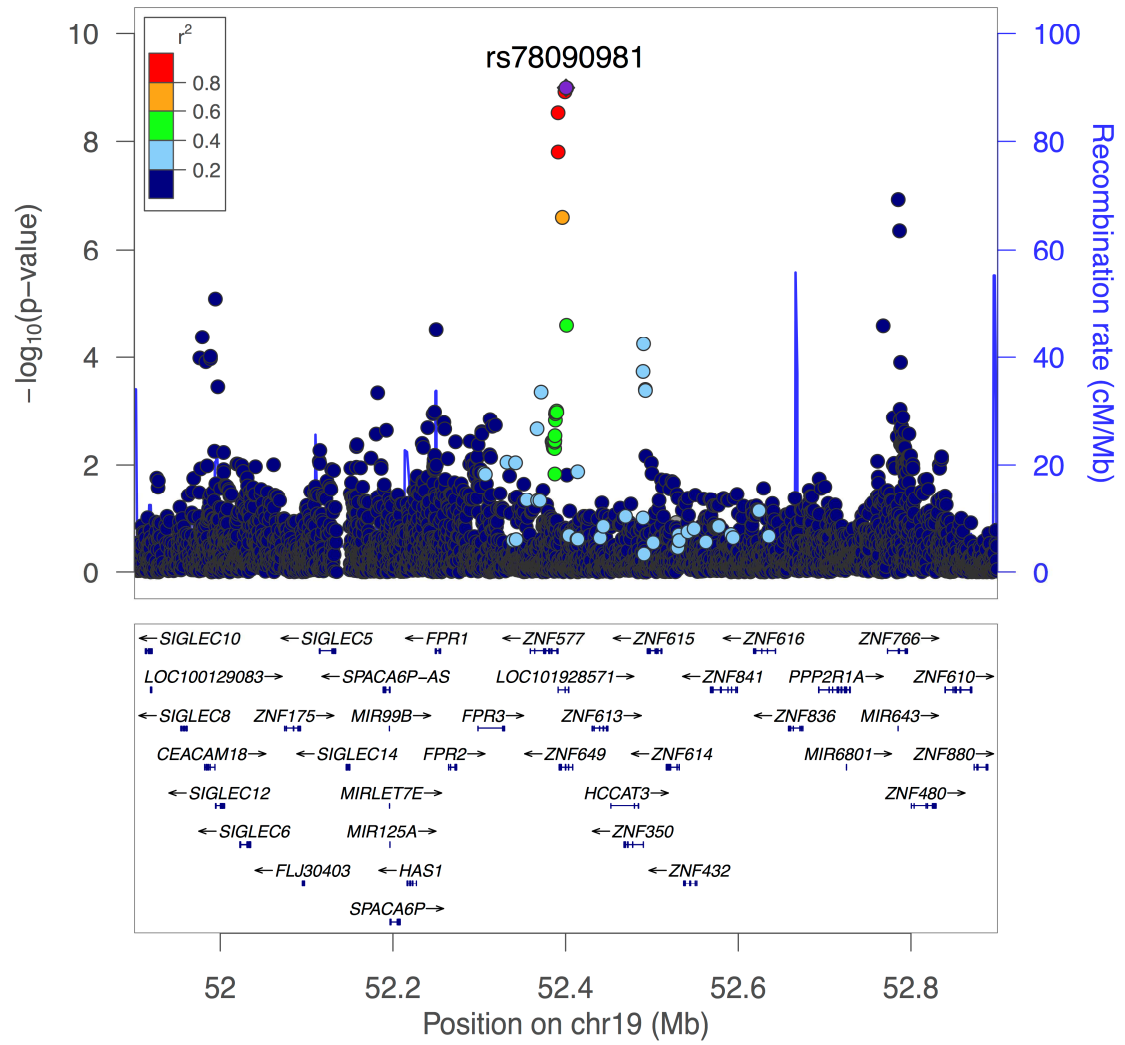

KG\_3\_117010986\_r  
Intensities: called genotypes

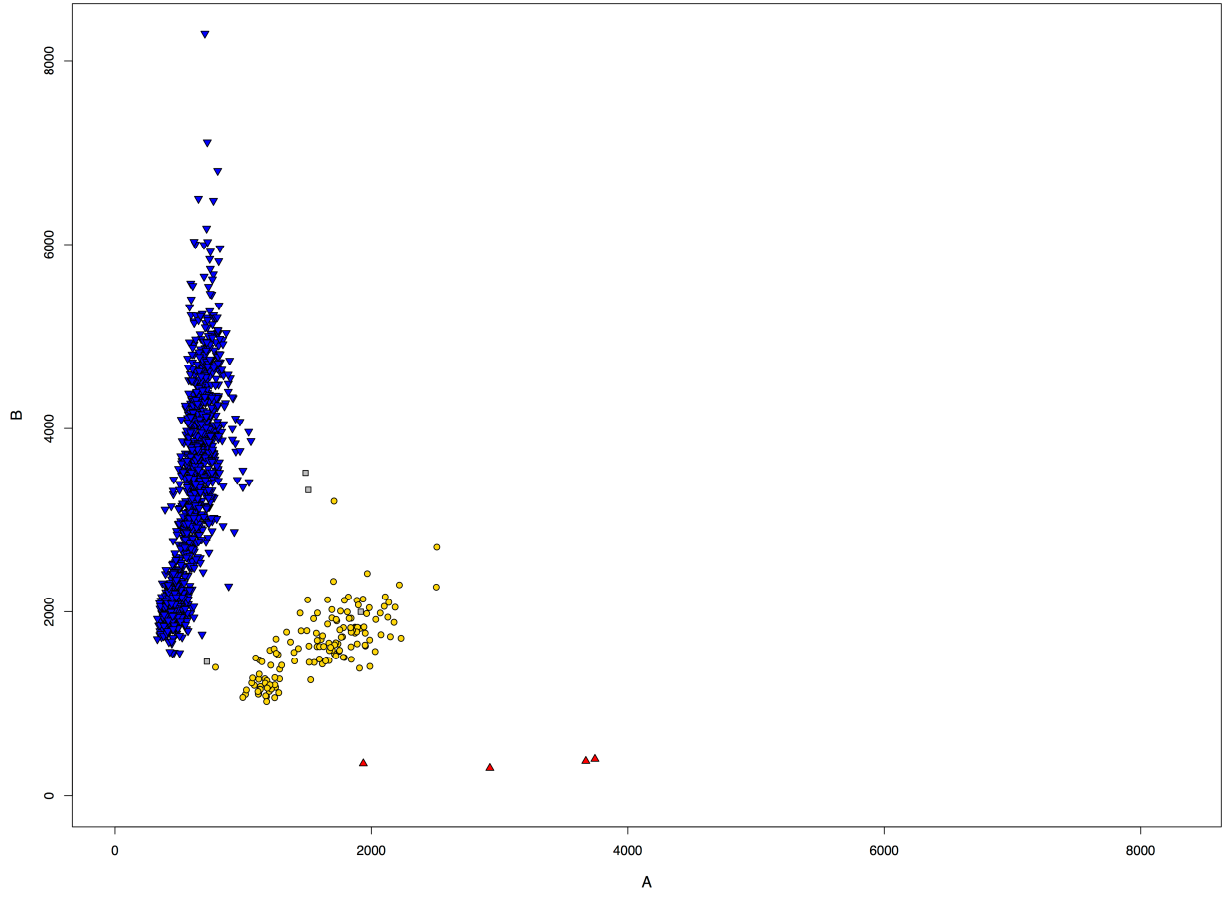
